# Supplementary material for: Body fluid volume homeostasis is abnormal in pregnancies complicated with hypertension and/or poor fetal growth
Source: PubMed Central journal article supplement (PMC6211673; doi:10.1371/journal.pone.0206257), 2018-11-01
Supplement: pone.0206257.s001.pdf [file pone.0206257.s001.pdf]

| ID Code | Abdo Surgery | Hypertension | Diabetes | Thrombophilia | Allergy | Race | Parity (0=nulli, 1=multi) | G | P | A | Start weight | Length | BMI  | History IU death |   |
|---------|--------------|--------------|----------|---------------|---------|------|---------------------------|---|---|---|--------------|--------|------|------------------|---|
| 1       | 0            | 0            | 0        | 0             | 0       |      |                           | 1 | 2 | 1 | 0            | 55     | 1,65 | 20,2             | 0 |
| 2       | 0            | 0            | 0        | 0             | 0       |      |                           | 0 | 1 | 0 | 0            | 93     | 1,68 | 32,95            | 0 |
| 3       | 0            | 0            | 0        | 0             | 0       |      |                           | 0 | 1 | 0 | 0            | 53     | 1,56 | 21,78            | 0 |
| 4       | 0            | 1            | 0        | 0             | 0       |      |                           | 1 | 2 | 1 | 0            | 44     | 1,58 | 17,63            | 0 |
| 5       | 0            | 0            | 0        | 0             | 0       |      |                           | 1 | 9 | 4 | 4            | 65     | 1,65 | 23,88            | 0 |
| 6       | 0            | 0            | 0        | 0             | 0       |      |                           | 1 | 5 | 1 | 3            | 58     | 1,64 | 21,56            | 0 |
| 7       | 0            | 0            | 0        | 0             | 0       |      |                           | 0 | 1 | 0 | 0            | 80     | 1,7  | 27,68            | 0 |
| 8       | 0            | 0            | 0        | 0             | 0       |      |                           | 0 | 2 | 0 | 1            | 48     | 1,49 | 21,62            | 0 |
| 9       | 0            | 0            | 0        | 0             | 0       |      |                           | 0 | 1 | 0 | 0            | 76     | 1,68 | 26,93            | 0 |
| 10      | 0            | 0            | 0        | 0             | 0       |      |                           | 1 | 5 | 2 | 2            | 51     | 1,68 | 18,07            | 0 |
| 11      | 0            | 0            | 0        | 0             | 0       |      |                           | 1 | 3 | 1 | 1            | 56     | 1,5  | 24,89            | 0 |
| 12      | 0            | 1            | 0        | 0             | 0       |      |                           | 1 | 7 | 4 | 2            | 49     | 1,54 | 20,66            | 0 |
| 13      | 0            | 0            | 0        | 0             | 0       |      |                           | 0 | 1 | 0 | 0            | 60     | 1,68 | 21,26            | 0 |
| 14      | 0            | 0            | 1        | 0             | 0       |      |                           | 0 | 1 | 0 | 0            | 47     | 1,62 | 17,91            | 0 |
| 15      | 0            | 0            | 0        | 0             | 0       | 1    |                           | 0 | 1 | 0 | 1            | 55     | 1,68 | 19,49            | 0 |
| 16      | 0            | 0            | 0        | 0             | 0       | 1    |                           | 0 | 1 | 0 | 1            | 55     | 1,68 | 19,49            | 0 |
| 17      | 2            | 0            | 0        | 0             | 0       | 3    |                           | 1 | 2 | 1 | 0            | 63     | 1,72 | 21,3             | 0 |
| 18      | 0            | 0            | 0        | 0             | 0       | 1    |                           | 1 | 2 | 1 | 0            | 96     | 1,72 | 32,45            | 0 |
| 19      | 0            | 0            | 0        | 0             | 0       | 1    |                           | 1 | 2 | 1 | 0            | 96     | 1,72 | 32,45            | 0 |
| 20      | 1            | 0            | 0        | 0             | 0       | 3    |                           | 0 | 2 | 0 | 1            | 42     | 1,54 | 17,71            | 0 |
| 21      | 1            | 0            | 0        | 0             | 0       | 3    |                           | 0 | 2 | 0 | 1            | 42     | 1,54 | 17,71            | 0 |
| 22      | 0            | 0            | 0        | 0             | 1       | 1    |                           | 1 | 2 | 1 | 0            | 67     | 1,57 | 27,18            | 0 |
| 23      | 0            | 0            | 0        | 0             | 0       | 6    |                           | 1 | 3 | 1 | 1            | 73     | 1,6  | 28,52            | 0 |
| 24      | 1            | 1            | 0        | 0             | 0       | 1    |                           | 1 | 2 | 1 | 0            | 72     | 1,55 | 29,97            | 0 |
| 25      | 1            | 1            | 0        | 0             | 0       | 1    |                           | 1 | 2 | 1 | 0            | 72     | 1,55 | 29,97            | 0 |
| 26      | 2            | 0            | 0        | 0             | 0       | 3    |                           | 1 | 3 | 2 | 0            | 85     | 1,5  | 37,78            | 0 |
| 27      | 2            | 0            | 0        | 0             | 0       | 3    |                           | 1 | 3 | 2 | 0            | 85     | 1,5  | 37,78            | 0 |
| 28      | 0            | 0            | 0        | 0             | 0       | 1    |                           | 0 | 1 | 0 | 0            | 60     | 1,67 | 21,51            | 0 |
| 29      | 0            | 0            | 0        | 0             | 0       | 1    |                           | 0 | 1 | 0 | 0            | 60     | 1,67 | 21,51            | 0 |
| 30      | 1            | 0            | 0        | 0             | 1       | 1    |                           | 1 | 4 | 1 | 2            | 80     | 1,72 | 27,04            | 0 |
| 31      | 1            | 0            | 0        | 0             | 1       | 1    |                           | 1 | 4 | 1 | 2            | 80     | 1,72 | 27,04            | 0 |
| 32      | 1            | 0            | 0        | 0             | 1       | 3    |                           | 0 | 1 | 0 | 0            | 66     | 1,58 | 26,44            | 0 |

|    |   |   |   |   |   |   |   |   |   |   |      |      |       |   |
|----|---|---|---|---|---|---|---|---|---|---|------|------|-------|---|
| 33 | 1 | 0 | 0 | 0 | 1 | 3 | 0 | 1 | 0 | 0 | 66   | 1,58 | 26,44 | 0 |
| 34 | 0 | 1 | 0 | 0 | 0 |   | 1 | 4 | 2 | 1 | 59   | 1,47 | 27,30 | 0 |
| 35 | 0 | 0 | 0 | 0 | 0 |   | 1 | 2 | 1 | 0 | 60   | 1,67 | 21,51 | 0 |
| 36 | 0 | 0 | 0 | 0 | 0 |   | 0 | 1 | 0 | 0 | 68   | 1,78 | 21,46 | 0 |
| 37 | 0 | 0 | 0 | 0 | 0 |   | 0 | 1 | 0 | 0 | 49   | 1,64 | 18,22 | 0 |
| 38 | 0 | 0 | 0 | 0 | 0 |   | 0 | 1 | 0 | 0 | 68   | 1,68 | 24,09 | 0 |
| 39 | 0 | 0 | 0 | 0 | 0 |   | 0 | 1 | 0 | 0 | 68   | 1,68 | 24,09 | 0 |
| 40 | 0 | 0 | 0 | 0 | 0 |   | 0 | 2 | 0 | 1 | 72   | 1,65 | 26,45 | 0 |
| 41 | 0 | 0 | 0 | 0 | 0 |   | 0 | 2 | 0 | 1 | 57   | 1,6  | 22,27 | 0 |
| 42 | 0 | 0 | 0 | 0 | 0 |   | 0 | 1 | 0 | 0 | 53   | 1,6  | 20,7  | 0 |
| 43 | 0 | 0 | 0 | 0 | 0 |   | 0 | 1 | 0 | 0 | 86   | 1,65 | 31,59 | 0 |
| 44 | 0 | 0 | 0 | 0 | 0 |   | 0 | 1 | 0 | 0 | 51   | 1,58 | 20,43 | 0 |
| 45 | 0 | 0 | 0 | 0 | 0 |   | 1 | 2 | 1 | 0 | 63   | 1,6  | 24,61 | 0 |
| 46 | 0 | 0 | 0 | 0 | 0 |   | 0 | 2 | 0 | 1 | 64   | 1,72 | 21,63 | 0 |
| 47 | 0 | 0 | 0 | 0 | 0 |   | 0 | 1 | 0 | 0 | 59   | 1,6  | 23,05 | 0 |
| 48 | 0 | 0 | 0 | 0 | 0 |   | 0 | 1 | 0 | 0 | 67   | 1,65 | 24,61 | 0 |
| 49 | 0 | 0 | 0 | 0 | 0 |   | 1 | 2 | 1 | 0 | 63   | 1,6  | 24,61 | 0 |
| 50 | 0 | 0 | 0 | 0 | 1 | 1 | 1 | 2 | 1 | 0 | 52,3 | 1,53 | 22,34 | 0 |
| 51 | 0 | 0 | 0 | 0 | 0 |   | 0 | 1 | 0 | 0 | 64   | 1,61 | 24,69 | 0 |
| 52 | 0 | 0 | 0 | 0 | 0 |   | 1 | 5 | 3 | 1 | 55   | 1,68 | 19,49 | 0 |
| 53 | 0 | 0 | 0 | 0 | 0 |   | 0 | 1 | 0 | 0 | 61   | 1,77 | 19,47 | 0 |
| 54 | 0 | 0 | 0 | 0 | 0 |   | 0 | 1 | 0 | 0 | 45   | 1,53 | 19,22 | 0 |
| 55 | 0 | 0 | 0 | 0 | 0 |   | 0 | 1 | 0 | 0 | 49   | 1,64 | 18,22 | 0 |
| 56 | 0 | 0 | 0 | 0 | 0 |   | 0 | 1 | 0 | 0 | 86   | 1,72 | 29,07 | 0 |
| 57 | 0 | 0 | 0 | 0 | 0 |   | 0 | 1 | 0 | 0 | 86   | 1,72 | 29,07 | 0 |
| 58 | 0 | 0 | 0 | 0 | 0 |   | 1 | 2 | 1 | 0 | 45   | 1,6  | 17,58 | 0 |
| 59 | 0 | 0 | 0 | 0 | 0 |   | 0 | 1 | 0 | 0 | 64   | 1,7  | 22,15 | 0 |
| 60 | 0 | 0 | 0 | 0 | 0 |   | 0 | 1 | 0 | 0 | 68   | 1,64 | 25,28 | 0 |
| 61 | 0 | 0 | 0 | 0 | 0 |   | 0 | 1 | 0 | 0 | 64   | 1,7  | 22,15 | 0 |
| 62 | 0 | 0 | 0 | 0 | 0 |   | 0 | 1 | 0 | 0 | 86   | 1,72 | 29,07 | 0 |
| 63 | 0 | 0 | 0 | 0 | 0 |   | 0 | 1 | 0 | 0 | 63   | 1,68 | 22,32 | 0 |
| 64 | 0 | 0 | 0 | 0 | 0 |   | 0 | 2 | 0 | 1 | 69   | 1,57 | 27,99 | 0 |
| 65 | 0 | 0 | 0 | 0 | 0 |   | 1 | 3 | 1 | 1 | 99   | 1,65 | 36,36 | 0 |

|    |   |   |   |   |   |   |  |   |   |   |   |    |      |       |   |
|----|---|---|---|---|---|---|--|---|---|---|---|----|------|-------|---|
| 66 | 0 | 0 | 0 | 0 | 0 |   |  | 1 | 2 | 1 | 0 | 57 | 1,63 | 21,45 | 0 |
| 67 | 0 | 0 | 0 | 0 | 0 |   |  | 0 | 2 | 0 | 1 | 49 | 1,65 | 18    | 0 |
| 68 | 0 | 1 | 0 | 0 | 0 |   |  | 1 | 2 | 1 | 0 | 58 | 1,73 | 19,38 | 0 |
| 69 | 0 | 1 | 0 | 0 | 0 |   |  | 1 | 2 | 1 | 0 | 58 | 1,73 | 19,38 | 0 |
| 70 | 0 | 0 | 0 | 0 | 0 |   |  | 1 | 3 | 2 | 0 | 75 | 1,65 | 27,55 | 0 |
| 71 | 0 | 0 | 0 | 0 | 0 |   |  | 0 | 1 | 0 | 0 | 58 | 1,68 | 20,55 | 0 |
| 72 | 0 | 0 | 0 | 0 | 0 |   |  | 0 | 1 | 0 | 0 | 53 | 1,55 | 22,06 | 0 |
| 73 | 0 | 0 | 0 | 0 | 0 |   |  | 1 | 2 | 1 | 0 | 58 | 1,61 | 22,38 | 0 |
| 74 | 0 | 0 | 0 | 0 | 0 |   |  | 1 | 4 | 2 | 1 | 89 | 1,76 | 28,73 | 0 |
| 75 | 0 | 0 | 0 | 0 | 0 |   |  | 0 | 1 | 0 | 0 | 45 | 1,6  | 17,58 | 0 |
| 76 | 0 | 0 | 0 | 0 | 0 |   |  | 1 | 3 | 2 | 0 | 88 | 1,68 | 31,18 | 0 |
| 77 | 0 | 0 | 0 | 0 | 0 |   |  | 1 | 3 | 1 | 1 | 55 | 1,65 | 20,2  | 0 |
| 78 | 0 | 0 | 0 | 0 | 0 |   |  | 1 | 3 | 1 | 1 | 58 | 1,85 | 16,95 | 0 |
| 79 | 0 | 0 | 0 | 0 | 0 |   |  | 1 | 2 | 1 | 0 | 60 | 1,63 | 22,58 | 0 |
| 80 | 0 | 0 | 0 | 0 | 0 |   |  | 0 | 1 | 0 | 0 | 65 | 1,73 | 21,72 | 0 |
| 81 | 0 | 0 | 0 | 0 | 0 |   |  | 0 | 1 | 0 | 0 | 53 | 1,54 | 22,35 | 0 |
| 82 | 0 | 0 | 0 | 0 | 0 |   |  | 0 | 1 | 0 | 0 | 65 | 1,73 | 21,72 | 0 |
| 83 | 0 | 0 | 0 | 0 | 0 |   |  | 1 | 3 | 2 | 0 | 86 | 1,68 | 30,47 | 0 |
| 84 | 0 | 0 | 0 | 0 | 1 | 2 |  | 0 | 1 | 0 | 0 | 94 | 1,65 | 34,53 | 0 |
| 85 | 0 | 0 | 0 | 0 | 1 | 2 |  | 0 | 1 | 0 | 0 | 94 | 1,65 | 34,53 | 0 |
| 86 | 0 | 0 | 0 | 0 | 0 |   |  | 0 | 2 | 0 | 1 | 66 | 1,66 | 23,95 | 0 |
| 87 | 0 | 0 | 0 | 0 | 0 |   |  | 1 | 2 | 1 | 0 |    | 1,68 |       | 0 |
| 88 | 0 | 0 | 0 | 0 | 0 |   |  | 0 | 1 | 0 | 0 | 58 | 1,73 | 19,38 | 0 |
| 89 | 0 | 0 | 0 | 0 | 0 |   |  | 1 | 4 | 3 | 0 | 64 | 1,64 | 23,8  | 0 |
| 90 | 0 | 0 | 0 | 0 | 0 |   |  | 1 | 4 | 3 | 0 | 64 | 1,64 | 23,8  | 0 |
| 91 | 0 | 1 | 0 | 0 | 0 |   |  | 1 | 2 | 1 | 0 | 58 | 1,63 | 21,83 | 0 |
| 92 | 0 | 1 | 0 | 0 | 0 |   |  | 1 | 2 | 1 | 0 | 58 | 1,63 | 21,83 | 0 |
| 93 | 0 | 0 | 0 | 0 | 0 |   |  | 0 | 1 | 0 | 0 | 68 | 1,58 | 27,24 | 0 |
| 94 | 0 | 0 | 0 | 0 | 0 |   |  | 1 | 2 | 1 | 0 | 80 | 1,65 | 29,38 | 0 |
| 95 | 0 | 0 | 0 | 0 | 0 |   |  | 0 | 1 | 0 | 0 | 58 | 1,55 | 24,14 | 0 |
| 96 | 0 | 0 | 0 | 0 | 0 |   |  | 1 | 2 | 1 | 0 | 71 | 1,6  | 27,73 | 0 |
| 97 | 0 | 0 | 0 | 0 | 0 |   |  | 0 | 1 | 0 | 0 | 83 | 1,68 | 29,41 | 0 |
| 98 | 0 | 0 | 0 | 0 | 0 |   |  | 1 | 2 | 1 | 0 | 68 | 1,6  | 26,56 | 0 |

|     |   |   |   |   |   |   |   |   |   |   |     |      |       |   |
|-----|---|---|---|---|---|---|---|---|---|---|-----|------|-------|---|
| 99  | 0 | 0 | 0 | 0 | 0 |   | 0 | 1 | 0 | 0 | 60  | 1,63 | 22,58 | 0 |
| 100 | 0 | 0 | 0 | 0 | 0 |   | 1 | 2 | 1 | 0 | 68  | 1,73 | 22,72 | 0 |
| 101 | 0 | 0 | 0 | 0 | 0 |   | 1 | 3 | 1 | 1 | 69  | 1,66 | 25,04 | 1 |
| 102 | 0 | 0 | 0 | 0 | 0 |   | 0 | 2 | 0 | 1 | 68  | 1,7  | 23,53 | 0 |
| 103 | 0 | 0 | 0 | 0 | 0 |   | 0 | 1 | 0 | 0 | 62  | 1,63 | 23,34 | 0 |
| 104 | 0 | 0 | 0 | 0 | 0 |   | 0 | 1 | 0 | 0 | 54  | 1,65 | 19,83 | 0 |
| 105 | 0 | 0 | 0 | 0 | 0 |   | 0 | 1 | 0 | 0 | 52  | 1,51 | 22,81 | 0 |
| 106 | 0 | 0 | 0 | 0 | 0 |   | 1 | 2 | 1 | 0 | 45  | 1,6  | 17,58 | 0 |
| 107 | 0 | 0 | 0 | 0 | 0 |   | 0 | 1 | 0 | 0 | 52  | 1,51 | 22,81 | 0 |
| 108 | 0 | 0 | 0 | 0 | 0 |   | 0 | 1 | 0 | 0 | 53  | 1,67 | 19    | 0 |
| 109 | 0 | 0 | 0 | 0 | 0 |   | 1 | 4 | 3 | 0 | 94  | 1,6  | 36,72 | 0 |
| 110 | 0 | 0 | 0 | 0 | 0 |   | 1 | 4 | 3 | 0 | 94  | 1,6  | 36,72 | 0 |
| 111 | 0 | 0 | 0 | 0 | 0 |   | 1 | 4 | 2 | 1 | 59  | 1,61 | 22,76 | 0 |
| 112 | 0 | 0 | 0 | 0 | 0 |   | 1 | 4 | 2 | 1 | 59  | 1,61 | 22,76 | 0 |
| 113 | 0 | 0 | 0 | 0 | 0 |   | 0 | 1 | 0 | 0 | 64  | 1,67 | 22,95 | 0 |
| 114 | 0 | 0 | 0 | 0 | 0 |   | 0 | 1 | 0 | 0 | 60  | 1,7  | 20,76 | 0 |
| 115 | 0 | 0 | 0 | 0 | 0 |   | 0 | 3 | 0 | 2 | 52  | 1,68 | 18,42 | 0 |
| 116 | 0 | 0 | 0 | 0 | 0 |   | 1 | 4 | 3 | 0 | 64  | 1,57 | 25,96 | 1 |
| 117 | 0 | 0 | 0 | 0 | 0 |   | 0 | 2 | 0 | 1 | 59  | 1,67 | 21,16 | 0 |
| 118 | 0 | 1 | 0 | 0 | 0 |   | 1 | 2 | 1 | 0 | 73  | 1,65 | 26,81 | 0 |
| 119 | 0 | 0 | 0 | 0 | 0 |   | 0 | 1 | 0 | 0 | 79  | 1,68 | 27,99 | 0 |
| 120 | 0 | 0 | 0 | 0 | 0 |   | 0 | 2 | 0 | 1 | 75  | 1,7  | 25,95 | 0 |
| 121 | 0 | 0 | 0 | 0 | 0 |   | 1 | 2 | 1 | 0 | 55  | 1,67 | 19,72 | 0 |
| 122 | 0 | 0 | 0 | 0 | 0 |   | 0 | 1 | 0 | 0 | 108 | 1,74 | 35,67 | 0 |
| 123 | 0 | 0 | 0 | 0 | 0 |   | 1 | 2 | 1 | 0 |     |      |       | 1 |
| 124 | 0 | 0 | 0 | 0 | 0 |   | 0 | 2 | 0 | 1 | 75  | 1,7  | 25,95 | 0 |
| 125 | 0 | 0 | 0 | 0 | 0 | 1 | 1 | 9 | 7 | 1 | 82  | 1,7  | 28,37 | 0 |
| 126 | 0 | 0 | 0 | 0 | 0 |   | 0 | 1 | 0 | 0 | 108 | 1,74 | 35,67 | 0 |
| 127 | 0 | 0 | 0 | 0 | 0 |   | 1 | 2 | 1 | 0 |     |      |       | 1 |
| 128 | 0 | 0 | 0 | 0 | 0 |   | 1 | 2 | 1 | 0 |     |      |       | 1 |
| 129 | 0 | 1 | 0 | 0 | 0 |   | 1 | 2 | 1 | 0 | 84  | 1,72 | 28,39 | 0 |
| 130 | 0 | 0 | 0 | 0 | 0 |   | 1 | 2 | 1 | 0 | 73  | 1,72 | 24,68 | 0 |
| 131 | 0 | 0 | 0 | 0 | 0 |   | 1 | 2 | 1 | 0 | 64  | 1,67 | 22,95 | 0 |

|     |   |   |   |   |   |   |  |   |   |   |   |     |      |       |   |
|-----|---|---|---|---|---|---|--|---|---|---|---|-----|------|-------|---|
| 132 | 0 | 0 | 0 | 0 | 0 |   |  | 1 | 2 | 1 | 0 | 73  | 1,72 | 24,68 | 0 |
| 133 | 0 | 0 | 0 | 0 | 0 |   |  | 1 | 2 | 1 | 0 | 69  | 1,64 | 25,65 | 0 |
| 134 | 0 | 1 | 0 | 0 | 0 |   |  | 1 | 4 | 2 | 1 | 77  | 1,68 | 27,28 | 0 |
| 135 | 0 | 0 | 0 | 0 | 0 |   |  | 0 | 1 | 0 | 0 | 56  | 1,5  | 24,89 | 0 |
| 136 | 0 | 0 | 0 | 0 | 0 |   |  | 1 | 9 | 1 | 5 | 69  | 1,73 | 23,05 | 0 |
| 137 | 0 | 0 | 0 | 0 | 0 |   |  | 0 | 1 | 0 | 0 | 81  | 1,73 | 27,06 | 0 |
| 138 | 0 | 0 | 0 | 0 | 0 |   |  | 1 | 4 | 1 | 2 | 65  | 1,69 | 22,76 | 0 |
| 139 | 0 | 0 | 0 | 0 | 0 | 1 |  | 0 | 1 | 0 | 0 | 80  | 1,72 | 27,04 | 0 |
| 140 | 0 | 0 | 0 | 0 | 0 |   |  | 1 | 2 | 1 | 0 | 70  | 1,66 | 25,4  | 0 |
| 141 | 0 | 0 | 0 | 0 | 0 |   |  | 0 | 2 | 0 | 1 | 59  | 1,7  | 20,42 | 0 |
| 142 | 0 | 0 | 0 | 0 | 0 |   |  | 1 | 4 | 3 | 0 | 71  | 1,58 | 28,44 | 0 |
| 143 | 0 | 0 | 0 | 0 | 0 |   |  | 1 | 3 | 1 | 1 | 80  | 1,74 | 26,42 | 0 |
| 144 | 0 | 0 | 0 | 0 | 0 |   |  | 0 | 4 | 0 | 3 | 63  | 1,66 | 22,86 | 0 |
| 145 | 0 | 0 | 0 | 0 | 0 |   |  | 0 | 4 | 0 | 3 | 63  | 1,66 | 22,86 | 0 |
| 146 | 0 | 0 | 0 | 0 | 0 |   |  | 0 | 1 | 0 | 0 | 60  | 1,68 | 21,26 | 0 |
| 147 | 0 | 0 | 0 | 0 | 0 |   |  | 0 | 1 | 0 | 0 | 68  | 1,74 | 22,46 | 0 |
| 148 | 0 | 0 | 0 | 0 | 0 |   |  | 1 | 4 | 3 | 0 | 84  | 1,72 | 28,39 | 0 |
| 149 | 0 | 0 | 0 | 0 | 0 |   |  | 1 | 4 | 2 | 1 | 109 | 1,7  | 37,72 | 0 |
| 150 | 0 | 0 | 0 | 0 | 0 |   |  | 0 | 2 | 0 | 1 | 66  | 1,68 | 23,38 | 0 |
| 151 | 0 | 0 | 0 | 0 | 0 |   |  | 1 | 2 | 1 | 0 | 83  | 1,73 | 27,73 | 0 |
| 152 | 0 | 1 | 0 | 0 | 0 |   |  | 1 | 2 | 1 | 0 | 80  | 1,7  | 27,68 | 0 |
| 153 | 0 | 0 | 0 | 0 | 0 |   |  | 0 | 1 | 0 | 0 | 61  | 1,58 | 24,44 | 0 |
| 154 | 0 | 1 | 0 | 0 | 0 |   |  | 1 | 2 | 1 | 0 | 80  | 1,7  | 27,68 | 0 |
| 155 | 0 | 0 | 0 | 0 | 0 |   |  | 1 | 3 | 1 | 1 | 52  | 1,58 | 20,83 | 0 |
| 156 | 0 | 0 | 0 | 0 | 0 |   |  | 1 | 3 | 2 | 2 | 70  | 1,7  | 24,22 | 0 |
| 157 | 2 | 0 | 0 | 0 | 0 | 1 |  | 1 | 2 | 1 | 0 | 79  | 1,65 | 29,02 | 0 |
| 158 | 2 | 0 | 0 | 0 | 1 | 1 |  | 0 | 1 | 0 | 0 | 52  | 1,59 | 20,57 | 0 |
| 159 | 2 | 0 | 0 | 0 | 1 | 1 |  | 0 | 1 | 0 | 0 | 52  | 1,59 | 20,57 | 0 |
| 160 | 2 | 0 | 0 | 0 | 0 | 1 |  | 1 | 2 | 1 | 0 | 60  | 1,63 | 22,58 | 0 |
| 161 | 2 | 0 | 0 | 0 | 0 | 1 |  | 1 | 2 | 1 | 0 | 60  | 1,63 | 22,58 | 0 |
| 162 | 1 | 0 | 0 | 0 | 0 | 1 |  | 0 | 2 | 0 | 1 | 71  | 1,78 | 22,41 | 0 |
| 163 | 1 | 0 | 0 | 0 | 0 | 1 |  | 0 | 2 | 0 | 1 | 71  | 1,78 | 22,41 | 0 |
| 164 | 1 | 0 | 0 | 0 | 0 | 1 |  | 0 | 1 | 0 | 0 | 89  | 1,65 | 32,69 | 0 |

|     |   |   |   |   |   |   |   |   |   |   |    |      |       |   |
|-----|---|---|---|---|---|---|---|---|---|---|----|------|-------|---|
| 165 | 1 | 0 | 0 | 0 | 0 | 1 | 0 | 1 | 0 | 0 | 89 | 1,65 | 32,69 | 0 |
| 166 | 1 | 0 | 0 | 0 | 1 | 2 | 1 | 5 | 1 | 3 | 72 | 1,72 | 24,34 | 0 |
| 167 | 1 | 0 | 0 | 0 | 1 | 2 | 1 | 5 | 1 | 3 | 72 | 1,72 | 24,34 | 0 |
| 168 | 1 | 1 | 0 | 0 | 0 |   | 1 | 2 | 1 | 0 | 60 | 1,6  | 23,44 | 0 |
| 169 | 2 | 0 | 0 | 0 | 0 | 1 | 0 | 1 | 0 | 0 | 87 | 1,62 | 33,15 | 0 |
| 170 | 1 | 1 | 0 | 0 | 1 | 2 | 1 | 2 | 1 | 0 | 53 | 1,6  | 20,7  | 0 |
| 171 | 1 | 1 | 0 | 0 | 1 | 2 | 1 | 2 | 1 | 0 | 53 | 1,6  | 20,7  | 0 |
| 172 | 0 | 0 | 0 | 0 | 0 |   | 0 | 1 | 0 | 0 | 68 | 1,76 | 21,95 | 0 |
| 173 | 0 | 0 | 0 | 0 | 0 |   | 1 | 3 | 1 | 1 | 78 | 1,68 | 27,64 | 0 |
| 174 | 0 | 1 | 0 | 0 | 0 |   | 1 | 4 | 1 | 2 | 62 | 1,54 | 26,14 | 0 |
| 175 | 0 | 0 | 0 | 0 | 0 |   | 0 | 2 | 0 | 1 | 70 | 1,73 | 23,39 | 0 |
| 176 | 0 | 0 | 0 | 0 | 0 |   | 1 | 2 | 1 | 0 | 68 | 1,65 | 24,98 | 1 |
| 177 | 0 | 0 | 0 | 0 | 0 |   | 1 | 6 | 3 | 2 | 48 | 1,57 | 19,47 | 0 |
| 178 | 0 | 1 | 0 | 0 | 0 |   | 1 | 2 | 1 | 0 | 67 | 1,7  | 23,18 | 0 |
| 179 | 0 | 1 | 0 | 0 | 0 |   | 1 | 2 | 1 | 0 | 67 | 1,7  | 23,18 | 0 |
| 180 | 0 | 1 | 0 | 0 | 0 |   | 1 | 2 | 1 | 0 | 67 | 1,7  | 23,18 | 0 |
| 181 | 2 | 0 | 0 | 0 | 0 | 3 | 1 | 4 | 2 | 1 | 78 | 1,55 | 32,47 | 0 |
| 182 | 0 | 1 | 0 | 0 | 0 |   | 1 | 2 | 1 | 0 | 62 | 1,57 | 25,15 | 0 |
| 183 | 0 | 0 | 0 | 0 | 0 |   | 1 | 2 | 1 | 0 | 53 | 1,7  | 18,34 | 0 |
| 184 | 0 | 0 | 0 | 0 | 0 |   | 1 | 2 | 1 | 0 | 52 | 1,58 | 20,83 | 0 |
| 185 | 0 | 0 | 0 | 0 | 0 |   | 1 | 4 | 2 | 1 |    |      |       | 0 |
| 186 | 0 | 0 | 0 | 0 | 0 |   | 0 | 1 | 0 | 0 | 73 | 1,71 | 24,96 | 0 |
| 187 | 0 | 0 | 0 | 0 | 0 |   | 1 | 5 | 2 | 2 | 92 | 1,67 | 32,99 | 0 |
| 188 | 0 | 0 | 0 | 0 | 0 |   | 1 | 3 | 1 | 1 | 93 | 1,65 | 34,16 | 0 |
| 189 | 0 | 0 | 0 | 0 | 0 |   | 1 | 3 | 1 | 1 | 72 | 1,68 | 25,51 | 0 |
| 190 | 1 | 1 | 0 | 0 | 0 |   | 1 | 2 | 1 | 0 | 85 | 1,72 | 28,73 | 0 |
| 191 | 1 | 1 | 0 | 0 | 0 |   | 1 | 2 | 1 | 0 | 85 | 1,72 | 28,73 | 0 |
| 192 | 0 | 0 | 0 | 0 | 0 |   | 1 | 2 | 1 | 0 | 66 | 1,67 | 23,67 | 0 |
| 193 | 1 | 0 | 0 | 0 | 1 |   | 1 | 3 | 1 | 1 | 52 | 1,62 | 19,81 | 0 |
| 194 | 0 | 0 | 0 | 0 | 0 |   | 1 | 2 | 1 | 0 | 59 | 1,64 | 21,94 | 0 |
| 195 | 0 | 0 | 0 | 0 | 0 |   | 1 | 2 | 1 | 0 | 69 | 1,67 | 24,74 | 0 |
| 196 | 1 | 0 | 0 | 0 | 1 | 1 | 1 | 3 | 1 | 1 | 51 | 1,57 | 20,69 | 0 |
| 197 | 1 | 0 | 0 | 0 | 1 | 1 | 1 | 3 | 1 | 1 | 51 | 1,57 | 20,69 | 0 |

|     |   |   |   |   |   |   |  |   |   |   |   |     |      |       |   |
|-----|---|---|---|---|---|---|--|---|---|---|---|-----|------|-------|---|
| 198 | 1 | 0 | 0 | 0 | 0 |   |  | 0 | 1 | 0 | 0 | 72  | 1,63 | 27,1  | 0 |
| 199 | 1 | 0 | 0 | 0 | 0 |   |  | 1 | 6 | 3 | 2 | 72  | 1,74 | 23,78 | 0 |
| 200 | 1 | 0 | 0 | 0 | 0 |   |  | 1 | 5 | 3 | 2 | 70  | 1,62 | 26,67 | 0 |
| 201 | 2 | 1 | 0 | 1 | 1 | 1 |  | 1 | 2 | 1 | 0 | 65  | 1,71 | 22,23 | 0 |
| 202 | 2 | 1 | 0 | 1 | 1 | 1 |  | 1 | 2 | 1 | 0 | 65  | 1,71 | 22,23 | 0 |
| 203 | 2 | 1 | 0 | 1 | 1 | 1 |  | 1 | 2 | 1 | 0 | 65  | 1,71 | 22,23 | 0 |
| 204 | 0 | 0 | 1 | 0 | 0 |   |  | 0 | 1 | 0 | 0 | 104 | 1,65 | 38,2  | 0 |
| 205 | 0 | 0 | 1 | 0 | 0 |   |  | 0 | 1 | 0 | 0 | 104 | 1,65 | 38,2  | 0 |
| 206 | 0 | 0 | 0 | 0 | 0 |   |  | 1 | 2 | 1 | 0 | 98  | 1,67 | 35,14 | 0 |
| 207 | 0 | 0 | 0 | 0 | 0 |   |  | 1 | 2 | 1 | 0 | 98  | 1,67 | 35,14 | 0 |
| 208 | 0 | 0 | 0 | 0 | 0 |   |  | 0 | 1 | 0 | 0 | 80  | 1,72 | 27,04 | 0 |
| 209 | 0 | 0 | 1 | 0 | 0 |   |  | 0 | 2 | 0 | 1 | 94  | 1,6  | 36,72 | 0 |
| 210 | 0 | 0 | 0 | 0 | 0 |   |  | 0 | 1 | 0 | 0 | 56  | 1,75 | 18,29 | 0 |
| 211 | 0 | 0 | 0 | 0 | 0 |   |  | 0 | 1 | 0 | 0 |     | 1,9  |       | 0 |
| 212 | 0 | 0 | 0 | 0 | 0 |   |  | 0 | 1 | 0 | 0 | 80  | 1,7  | 27,68 | 0 |
| 213 | 0 | 0 | 0 | 0 | 0 |   |  | 1 | 4 | 1 | 2 | 60  | 1,56 | 24,65 | 0 |
| 214 | 0 | 0 | 0 | 0 | 0 |   |  | 1 | 4 | 1 | 2 | 60  | 1,56 | 24,65 | 0 |
| 215 | 2 | 0 | 0 | 0 | 0 |   |  | 0 | 1 | 0 | 0 | 91  | 1,7  | 31,49 | 0 |
| 216 | 2 | 0 | 0 | 0 | 0 |   |  | 0 | 1 | 0 | 0 | 91  | 1,7  | 31,49 | 0 |
| 217 | 0 | 0 | 0 | 0 | 0 |   |  | 1 | 3 | 2 | 0 | 69  | 1,68 | 24,45 | 0 |
| 218 | 0 | 1 | 0 | 1 | 0 | 1 |  | 1 | 3 | 2 | 0 | 62  | 1,63 | 23,34 | 0 |
| 219 | 0 | 1 | 0 | 1 | 0 | 1 |  | 1 | 3 | 2 | 0 | 62  | 1,63 | 23,34 | 0 |
| 220 | 0 | 1 | 0 | 1 | 0 | 1 |  | 1 | 3 | 2 | 0 | 62  | 1,63 | 23,34 | 0 |
| 221 | 0 | 0 | 0 | 0 | 0 |   |  | 1 | 2 | 1 | 0 | 59  | 1,68 | 20,9  | 0 |
| 222 | 0 | 0 | 0 | 0 | 0 |   |  | 0 | 1 | 0 | 0 | 92  | 1,75 | 30,04 | 0 |
| 223 | 0 | 0 | 0 | 0 | 0 |   |  | 1 | 2 | 1 | 0 | 72  | 1,6  | 28,12 | 1 |
| 224 | 0 | 0 | 0 | 0 | 0 |   |  | 1 | 2 | 1 | 0 | 80  | 1,63 | 30,11 | 0 |
| 225 | 0 | 0 | 0 | 0 | 0 |   |  | 0 | 1 | 0 | 0 | 58  | 1,7  | 20,07 | 0 |
| 226 | 0 | 0 | 0 | 0 | 0 |   |  | 1 | 3 | 2 | 0 | 65  | 1,75 | 21,22 | 0 |
| 227 | 0 | 0 | 0 | 0 | 0 |   |  | 1 | 2 | 1 | 0 | 77  | 1,67 | 27,61 | 0 |
| 228 | 0 | 0 | 0 | 0 | 0 |   |  | 0 | 1 | 0 | 0 | 72  | 1,68 | 25,51 | 0 |
| 229 | 0 | 1 | 1 | 0 | 0 |   |  | 1 | 3 | 1 | 1 | 95  | 1,75 | 31,02 | 0 |
| 230 | 0 | 1 | 1 | 0 | 0 |   |  | 1 | 3 | 1 | 1 | 95  | 1,75 | 31,02 | 0 |

|     |   |   |   |   |   |   |   |   |   |   |      |      |       |   |
|-----|---|---|---|---|---|---|---|---|---|---|------|------|-------|---|
| 231 | 1 | 0 | 0 | 0 | 1 | 1 | 1 | 2 | 1 | 0 | 111  | 1,68 | 39,33 | 1 |
| 232 | 1 | 0 | 0 | 0 | 1 | 1 | 1 | 2 | 1 | 0 | 111  | 1,68 | 39,33 | 1 |
| 233 | 1 | 0 | 0 | 0 | 1 | 1 | 1 | 2 | 1 | 0 | 111  | 1,68 | 39,33 | 1 |
| 234 | 2 | 1 | 0 | 0 | 0 | 1 | 1 | 2 | 1 | 0 | 60   | 1,6  | 23,44 | 0 |
| 235 | 0 | 0 | 1 | 0 | 0 |   |   | 1 | 0 | 0 | 86   | 1,65 | 31,59 | 0 |
| 236 | 0 | 1 | 1 | 0 | 0 |   |   | 4 | 3 | 0 | 91   | 1,73 | 30,41 | 0 |
| 237 | 1 | 0 | 1 | 0 | 0 | 1 | 1 | 3 | 1 | 1 | 138  | 1,78 | 43,56 | 0 |
| 238 | 1 | 0 | 1 | 0 | 0 | 1 | 1 | 3 | 1 | 1 | 138  | 1,78 | 43,56 | 0 |
| 239 | 1 | 0 | 1 | 0 | 1 |   |   | 1 | 0 | 0 | 77,4 | 1,74 | 25,56 | 0 |
| 240 | 0 | 0 | 1 | 0 | 0 |   |   | 1 | 0 | 0 | 86   | 1,59 | 34,02 | 0 |
| 241 | 0 | 0 | 1 | 0 | 0 |   |   | 4 | 2 | 1 | 48   | 1,65 | 17,63 | 0 |
| 242 | 0 | 1 | 1 | 0 | 0 |   |   | 2 | 1 | 0 | 105  | 1,73 | 35,08 | 0 |
| 243 | 0 | 1 | 1 | 0 | 0 |   |   | 2 | 1 | 0 | 105  | 1,73 | 35,08 | 0 |
| 244 | 0 | 0 | 1 | 0 | 0 |   |   | 4 | 3 | 1 | 106  | 1,64 | 39,41 | 0 |
| 245 | 0 | 0 | 1 | 0 | 0 |   |   | 5 | 2 | 2 | 68   | 1,67 | 24,38 | 0 |
| 246 | 0 | 0 | 1 | 0 | 0 |   |   | 5 | 2 | 2 | 68   | 1,67 | 24,38 | 0 |
| 247 | 0 | 0 | 1 | 0 | 0 |   |   | 1 | 0 | 0 | 70   | 1,69 | 24,51 | 0 |
| 248 | 0 | 0 | 1 | 0 | 0 |   |   | 1 | 0 | 0 | 70   | 1,69 | 24,51 | 0 |
| 249 | 0 | 1 | 0 | 0 | 0 |   |   | 2 | 1 | 0 |      | 1,7  |       | 0 |
| 250 | 0 | 0 | 1 | 0 | 0 |   |   | 5 | 3 | 1 | 86   | 1,5  | 38,22 | 0 |
| 251 | 0 | 0 | 0 | 0 | 0 | 1 | 1 | 3 | 1 | 1 | 57   | 1,62 | 21,72 | 0 |
| 252 | 0 | 0 | 0 | 0 | 0 | 1 | 1 | 3 | 1 | 1 | 57   | 1,62 | 21,72 | 0 |
| 253 | 1 | 0 | 0 | 0 | 0 | 1 | 1 | 4 | 3 | 0 | 60   | 1,72 | 20,28 | 0 |
| 254 | 1 | 0 | 0 | 0 | 0 | 1 | 1 | 4 | 3 | 0 | 60   | 1,72 | 20,28 | 0 |
| 255 | 2 | 0 | 0 | 0 | 0 | 1 | 1 | 2 | 1 | 0 | 63   | 1,7  | 21,8  | 0 |
| 256 | 2 | 0 | 0 | 0 | 0 | 1 | 1 | 2 | 1 | 0 | 63   | 1,7  | 21,8  | 0 |
| 257 | 1 | 0 | 0 | 0 | 0 | 2 | 2 | 2 | 1 | 0 | 59   | 1,62 | 22,48 | 0 |
| 258 | 0 | 0 | 0 | 0 | 1 | 1 | 1 | 1 | 0 | 0 | 92   | 1,64 | 34,21 | 0 |
| 259 | 0 | 0 | 0 | 0 | 1 | 1 | 1 | 1 | 0 | 0 | 92   | 1,64 | 34,21 | 0 |
| 260 | 0 | 1 | 0 | 0 | 0 |   |   | 2 | 1 | 0 | 52   | 1,64 | 19,33 | 0 |
| 261 | 0 | 1 | 0 | 0 | 0 |   |   | 2 | 1 | 0 | 52   | 1,64 | 19,33 | 0 |
| 262 | 0 | 0 | 1 | 0 | 0 |   |   | 3 | 1 | 1 | 63   | 1,5  | 28    | 0 |
| 263 | 0 | 0 | 0 | 0 | 0 | 1 | 1 | 1 | 0 | 0 | 76   | 1,66 | 27,58 | 0 |



|     |   |   |   |   |   |   |   |   |   |   |     |      |       |   |
|-----|---|---|---|---|---|---|---|---|---|---|-----|------|-------|---|
| 264 | 0 | 0 | 0 | 0 | 0 | 1 | 0 | 1 | 0 | 0 | 76  | 1,66 | 27,58 | 0 |
| 265 | 0 | 0 | 0 | 0 | 0 | 3 | 1 | 3 | 2 | 0 | 89  | 1,73 | 29,74 | 0 |
| 266 | 2 | 0 | 0 | 0 | 0 | 3 | 0 | 2 | 0 | 1 | 59  | 1,64 | 21,94 | 0 |
| 267 | 2 | 0 | 0 | 0 | 0 | 3 | 0 | 2 | 0 | 1 | 59  | 1,64 | 21,94 | 0 |
| 268 | 0 | 0 | 0 | 1 | 1 | 1 | 1 | 2 | 1 | 0 | 70  | 1,66 | 25,4  | 0 |
| 269 | 0 | 0 | 0 | 1 | 1 | 1 | 1 | 2 | 1 | 0 | 70  | 1,66 | 25,4  | 0 |
| 270 | 0 | 0 | 0 | 0 | 0 | 2 | 0 | 1 | 0 | 0 | 58  | 1,58 | 23,23 | 0 |
| 271 | 0 | 0 | 0 | 0 | 0 | 2 | 0 | 1 | 0 | 0 | 58  | 1,58 | 23,23 | 0 |
| 272 | 1 | 0 | 0 | 0 | 0 | 1 | 0 | 1 | 0 | 1 | 68  | 1,69 | 23,81 | 0 |
| 273 | 1 | 0 | 0 | 0 | 0 | 1 | 0 | 1 | 0 | 1 | 68  | 1,69 | 23,81 | 0 |
| 274 | 0 | 0 | 0 | 0 | 0 | 1 | 0 | 1 | 0 | 0 | 49  | 1,6  | 19,14 | 0 |
| 275 | 0 | 0 | 0 | 0 | 0 | 1 | 0 | 1 | 0 | 0 | 49  | 1,6  | 19,14 | 0 |
| 276 | 0 | 0 | 0 | 0 | 0 | 1 | 0 | 1 | 0 | 0 | 62  | 1,6  | 24,22 | 0 |
| 277 | 0 | 0 | 0 | 0 | 0 | 1 | 0 | 1 | 0 | 0 | 62  | 1,6  | 24,22 | 0 |
| 278 | 0 | 0 | 0 | 0 | 0 | 1 | 1 | 3 | 1 | 1 | 72  | 1,7  | 24,91 | 0 |
| 279 | 0 | 0 | 0 | 0 | 0 | 1 | 1 | 3 | 1 | 1 | 72  | 1,7  | 24,91 | 0 |
| 280 | 0 | 0 | 0 | 0 | 0 | 2 | 1 | 3 | 1 | 1 | 72  | 1,7  | 24,91 | 0 |
| 281 | 0 | 0 | 0 | 0 | 0 | 2 | 1 | 3 | 1 | 1 | 72  | 1,7  | 24,91 | 0 |
| 282 | 0 | 0 | 0 | 0 | 0 | 3 | 1 | 3 | 2 | 0 | 101 | 1,61 | 38,96 | 0 |
| 283 | 0 | 0 | 0 | 0 | 0 | 3 | 1 | 3 | 2 | 0 | 101 | 1,61 | 38,96 | 0 |
| 284 | 0 | 0 | 0 | 0 | 0 | 1 | 1 | 2 | 1 | 0 | 74  | 1,67 | 26,53 | 0 |
| 285 | 0 | 0 | 0 | 0 | 0 | 1 | 1 | 2 | 1 | 0 | 74  | 1,67 | 26,53 | 0 |
| 286 | 0 | 0 | 0 | 0 | 0 | 2 | 1 | 5 | 3 | 1 | 72  | 1,75 | 23,51 | 0 |
| 287 | 0 | 0 | 0 | 0 | 0 | 2 | 1 | 5 | 3 | 1 | 72  | 1,75 | 23,51 | 0 |
| 288 | 1 | 0 | 0 | 0 | 0 | 3 | 1 | 3 | 2 | 0 | 60  | 1,65 | 22,04 | 0 |
| 289 | 1 | 0 | 0 | 0 | 0 | 3 | 1 | 3 | 2 | 0 | 60  | 1,65 | 22,04 | 0 |
| 290 | 1 | 0 | 0 | 0 | 0 | 1 | 1 | 4 | 2 | 1 | 79  | 1,67 | 28,33 | 0 |
| 291 | 1 | 0 | 0 | 0 | 0 | 1 | 1 | 4 | 2 | 1 | 79  | 1,67 | 28,33 | 0 |
| 292 | 1 | 0 | 1 | 0 | 0 | 1 | 0 | 2 | 0 | 1 | 60  | 1,62 | 22,86 | 0 |
| 293 | 1 | 0 | 1 | 0 | 0 | 1 | 0 | 2 | 0 | 1 | 60  | 1,62 | 22,86 | 0 |
| 294 | 1 | 0 | 0 | 0 | 1 | 2 | 1 | 2 | 1 | 0 | 70  | 1,68 | 24,8  | 0 |
| 295 | 1 | 0 | 0 | 0 | 1 | 2 | 1 | 2 | 1 | 0 | 70  | 1,68 | 24,8  | 0 |
| 296 | 2 | 0 | 0 | 0 | 0 | 3 | 1 | 2 | 1 | 0 | 69  | 1,64 | 25,65 | 0 |

|     |   |   |   |   |   |   |   |    |   |   |     |      |       |   |
|-----|---|---|---|---|---|---|---|----|---|---|-----|------|-------|---|
| 297 | 2 | 0 | 0 | 0 | 0 | 3 | 1 | 2  | 1 | 0 | 69  | 1,64 | 25,65 | 0 |
| 298 | 0 | 0 | 0 | 1 | 0 | 1 | 0 | 1  | 0 | 0 | 48  | 1,63 | 18,07 | 0 |
| 299 | 0 | 0 | 0 | 1 | 0 | 1 | 0 | 1  | 0 | 0 | 48  | 1,63 | 18,07 | 0 |
| 300 | 0 | 0 | 0 | 0 | 0 | 2 | 0 | 1  | 0 | 0 | 85  | 1,75 | 27,76 | 0 |
| 301 | 0 | 0 | 0 | 0 | 0 | 2 | 0 | 1  | 0 | 0 | 85  | 1,75 | 27,76 | 0 |
| 302 | 2 | 0 | 0 | 0 | 0 | 1 | 0 | 4  | 0 | 3 | 64  | 1,65 | 23,51 | 0 |
| 303 | 2 | 0 | 0 | 0 | 0 | 1 | 0 | 4  | 0 | 3 | 64  | 1,65 | 23,51 | 0 |
| 304 | 1 | 0 | 0 | 0 | 0 | 1 | 0 | 1  | 0 | 0 | 57  | 1,67 | 20,44 | 0 |
| 305 | 1 | 0 | 0 | 0 | 0 | 1 | 0 | 1  | 0 | 0 | 57  | 1,67 | 20,44 | 0 |
| 306 | 2 | 0 | 0 | 0 | 0 | 1 | 1 | 2  | 1 | 0 | 66  | 1,74 | 21,8  | 0 |
| 307 | 2 | 0 | 0 | 0 | 0 | 1 | 1 | 2  | 1 | 0 | 66  | 1,74 | 21,8  | 0 |
| 308 | 0 | 0 | 0 | 0 | 1 | 1 | 1 | 3  | 1 | 1 | 57  | 1,67 | 20,44 | 0 |
| 309 | 2 | 0 | 0 | 0 | 0 | 1 | 0 | 1  | 0 | 0 | 59  | 1,69 | 20,66 | 0 |
| 310 | 2 | 0 | 0 | 0 | 0 | 1 | 0 | 1  | 0 | 0 | 59  | 1,69 | 20,66 | 0 |
| 311 | 1 | 0 | 0 | 0 | 0 | 3 | 1 | 4  | 2 | 1 | 60  | 1,59 | 23,73 | 0 |
| 312 | 1 | 0 | 0 | 0 | 0 | 3 | 1 | 4  | 2 | 1 | 60  | 1,59 | 23,73 | 0 |
| 313 | 1 | 0 | 0 | 0 | 0 | 3 | 1 | 3  | 1 | 1 | 70  | 1,62 | 26,67 | 0 |
| 314 | 1 | 0 | 0 | 0 | 0 | 3 | 1 | 3  | 1 | 1 | 70  | 1,62 | 26,67 | 0 |
| 315 | 0 | 0 | 0 | 0 | 0 | 3 | 1 | 10 | 6 | 3 | 57  | 1,65 | 20,94 | 0 |
| 316 | 0 | 0 | 0 | 0 | 0 | 3 | 1 | 10 | 6 | 3 | 57  | 1,65 | 20,94 | 0 |
| 317 | 1 | 0 | 1 | 0 | 0 | 3 | 0 | 1  | 0 | 0 | 74  | 1,67 | 26,53 | 0 |
| 318 | 1 | 0 | 1 | 0 | 0 | 3 | 0 | 1  | 0 | 0 | 74  | 1,67 | 26,53 | 0 |
| 319 | 1 | 0 | 1 | 0 | 0 | 1 | 1 | 5  | 3 | 1 | 121 | 1,64 | 44,99 | 0 |
| 320 | 1 | 0 | 1 | 0 | 0 | 1 | 1 | 5  | 3 | 1 | 121 | 1,64 | 44,99 | 0 |
| 321 | 1 | 0 | 1 | 0 | 0 | 3 | 1 | 5  | 1 | 3 | 57  | 1,7  | 19,72 | 0 |
| 322 | 0 | 0 | 0 | 0 | 0 | 1 | 0 | 1  | 0 | 0 | 58  | 1,55 | 24,14 | 0 |
| 323 | 0 | 0 | 0 | 0 | 0 | 1 | 0 | 1  | 0 | 0 | 58  | 1,55 | 24,14 | 0 |
| 324 | 0 | 0 | 0 | 0 | 0 | 1 | 0 | 2  | 0 | 1 | 81  | 1,7  | 28,03 | 0 |
| 325 | 0 | 0 | 0 | 0 | 0 | 1 | 0 | 2  | 0 | 1 | 81  | 1,7  | 28,03 | 0 |
| 326 | 0 | 0 | 0 | 0 | 0 | 3 | 1 | 2  | 1 | 0 | 70  | 1,62 | 26,67 | 0 |
| 327 | 0 | 0 | 0 | 0 | 0 | 1 | 0 | 1  | 0 | 0 | 60  | 1,68 | 21,26 | 0 |
| 328 | 0 | 0 | 0 | 0 | 0 | 1 | 0 | 1  | 0 | 0 | 60  | 1,68 | 21,26 | 0 |
| 329 | 0 | 0 | 0 | 0 | 0 | 1 | 0 | 1  | 0 | 1 | 55  | 1,68 | 19,49 | 0 |

|     |   |   |   |   |   |   |   |   |   |   |      |      |       |   |
|-----|---|---|---|---|---|---|---|---|---|---|------|------|-------|---|
| 330 | 0 | 0 | 0 | 0 | 0 | 3 | 1 | 5 | 3 | 1 | 54   | 1,56 | 22,19 | 0 |
| 331 | 0 | 0 | 0 | 0 | 0 | 3 | 1 | 5 | 3 | 1 | 54   | 1,56 | 22,19 | 0 |
| 332 | 0 | 0 | 0 | 1 | 0 | 1 | 0 | 1 | 0 | 0 | 54   | 1,64 | 20,08 | 0 |
| 333 | 0 | 0 | 0 | 1 | 0 | 1 | 0 | 1 | 0 | 0 | 54   | 1,64 | 20,08 | 0 |
| 334 | 2 | 0 | 0 | 0 | 0 | 1 | 0 | 2 | 0 | 1 | 86   | 1,65 | 31,59 | 0 |
| 335 | 2 | 0 | 0 | 0 | 0 | 1 | 0 | 2 | 0 | 1 | 86   | 1,65 | 31,59 | 0 |
| 336 | 1 | 0 | 0 | 0 | 1 | 1 | 1 | 2 | 1 | 0 | 66   | 1,67 | 23,67 | 0 |
| 337 | 1 | 0 | 0 | 0 | 1 | 1 | 1 | 2 | 1 | 0 | 66   | 1,67 | 23,67 | 0 |
| 338 | 2 | 0 | 0 | 0 | 0 | 1 | 0 | 2 | 0 | 1 | 116  | 1,76 | 37,45 | 0 |
| 339 | 1 | 0 | 0 | 0 | 1 | 1 | 1 | 4 | 2 | 1 | 63   | 1,72 | 21,3  | 0 |
| 340 | 1 | 0 | 0 | 0 | 1 | 1 | 1 | 4 | 2 | 1 | 63   | 1,72 | 21,3  | 0 |
| 341 | 2 | 0 | 0 | 0 | 0 | 3 | 1 | 3 | 2 | 0 | 65   | 1,64 | 24,17 | 0 |
| 342 | 2 | 0 | 0 | 0 | 0 | 3 | 1 | 3 | 2 | 0 | 65   | 1,64 | 24,17 | 0 |
| 343 | 2 | 0 | 0 | 0 | 0 | 1 | 1 | 3 | 1 | 1 | 58   | 1,71 | 19,84 | 0 |
| 344 | 2 | 0 | 0 | 0 | 0 | 1 | 1 | 3 | 1 | 1 | 58   | 1,71 | 19,84 | 0 |
| 345 | 2 | 0 | 0 | 0 | 1 | 1 | 1 | 2 | 1 | 0 | 54   | 1,65 | 19,83 | 0 |
| 346 | 2 | 0 | 0 | 0 | 1 | 1 | 1 | 2 | 1 | 0 | 54   | 1,65 | 19,83 | 0 |
| 347 | 0 | 0 | 0 | 0 | 0 | 1 | 0 | 1 | 0 | 0 | 67   | 1,71 | 22,91 | 0 |
| 348 | 0 | 0 | 0 | 0 | 0 | 1 | 0 | 1 | 0 | 0 | 67   | 1,71 | 22,91 | 0 |
| 349 | 2 | 0 | 0 | 0 | 1 | 3 | 1 | 2 | 1 | 0 | 66   | 1,6  | 25,78 | 0 |
| 350 | 2 | 0 | 0 | 0 | 1 | 3 | 1 | 2 | 1 | 0 | 66   | 1,6  | 25,78 | 0 |
| 351 | 2 | 0 | 0 | 0 | 1 | 2 | 0 | 1 | 0 | 0 | 63   | 1,7  | 21,8  | 0 |
| 352 | 2 | 0 | 0 | 0 | 1 | 2 | 0 | 1 | 0 | 0 | 63   | 1,7  | 21,8  | 0 |
| 353 | 1 | 0 | 0 | 0 | 1 | 1 | 1 | 2 | 1 | 0 | 52   | 1,64 | 19,33 | 0 |
| 354 | 1 | 0 | 0 | 0 | 1 | 1 | 1 | 2 | 1 | 0 | 52   | 1,64 | 19,33 | 0 |
| 355 | 0 | 0 | 0 | 0 | 1 | 1 | 0 | 1 | 0 | 0 | 56   | 1,56 | 23,01 | 0 |
| 356 | 0 | 0 | 0 | 0 | 1 | 1 | 0 | 1 | 0 | 0 | 56   | 1,56 | 23,01 | 0 |
| 357 | 0 | 0 | 0 | 0 | 0 | 2 | 0 | 1 | 0 | 0 | 80   | 1,73 | 26,73 | 0 |
| 358 | 1 | 0 | 0 | 1 | 0 | 3 | 0 | 1 | 0 | 0 | 51   | 1,65 | 18,73 | 0 |
| 359 | 2 | 1 | 0 | 0 | 0 | 2 | 0 | 1 | 0 | 0 | 78   | 1,58 | 31,24 | 0 |
| 360 | 1 | 0 | 0 | 0 | 1 | 3 | 1 | 5 | 1 | 3 | 58   | 1,62 | 22,10 | 0 |
| 361 | 1 | 0 | 0 | 0 | 1 | 3 | 1 | 3 | 2 | 0 | 56   | 1,6  | 21,88 | 0 |
| 362 | 1 | 0 | 0 | 1 | 1 | 1 | 0 | 2 | 0 | 1 | 81,5 | 1,78 | 25,72 | 0 |

|     |   |   |   |   |   |   |   |   |   |   |      |      |       |   |
|-----|---|---|---|---|---|---|---|---|---|---|------|------|-------|---|
| 363 | 2 | 0 | 0 | 0 | 0 | 1 | 0 | 1 | 0 | 0 | 110  | 1,73 | 36,75 | 0 |
| 364 | 1 | 0 | 0 | 0 | 0 | 1 | 0 | 1 | 0 | 0 | 58   | 1,67 | 20,80 | 0 |
| 365 | 1 | 0 | 0 | 0 | 0 | 1 | 0 | 1 | 0 | 0 | 59   | 1,65 | 21,67 | 0 |
| 366 | 1 | 0 | 0 | 0 | 0 | 1 | 0 | 1 | 0 | 0 | 63   | 1,61 | 24,30 | 0 |
| 367 | 1 | 0 | 0 | 0 | 0 | 1 | 1 | 2 | 1 | 0 | 88,8 | 1,8  | 27,41 | 0 |
| 368 | 0 | 0 | 0 | 0 | 0 | 1 | 0 | 1 | 0 | 0 | 72   | 1,65 | 26,45 | 0 |
| 369 | 2 | 0 | 1 | 0 | 0 | 1 | 0 | 1 | 0 | 0 | 55   | 1,76 | 17,76 | 0 |
| 370 | 1 | 0 | 0 | 0 | 0 | 2 | 1 | 3 | 2 | 0 | 65   | 1,63 | 24,46 | 0 |
| 371 | 2 | 1 | 1 | 1 | 1 |   | 1 | 3 | 1 | 1 | 80   | 1,68 | 28,34 | 0 |
| 372 | 1 | 0 | 0 | 0 | 0 | 1 | 0 | 1 | 0 | 0 | 69   | 1,59 | 27,29 | 0 |
| 373 | 0 | 0 | 0 | 0 | 1 | 3 | 0 | 2 | 0 | 1 | 45   | 1,62 | 17,15 | 0 |
| 374 | 2 | 0 | 0 | 0 | 0 | 1 | 0 | 1 | 0 | 0 | 70   | 1,74 | 23,12 | 0 |
| 375 | 1 | 0 | 0 | 0 | 1 | 3 | 1 | 2 | 1 | 0 | 58   | 1,58 | 23,23 | 0 |
| 376 | 1 | 0 | 1 | 0 | 0 | 2 | 0 | 1 | 0 | 0 | 57   | 1,7  | 19,72 | 0 |
| 377 | 1 | 0 | 0 | 0 | 0 |   | 0 | 1 | 0 | 0 | 65   | 1,7  | 22,49 | 0 |
| 378 | 1 | 0 | 0 | 0 | 0 | 1 | 1 | 2 | 1 | 0 | 64   | 1,71 | 21,89 | 0 |
| 379 | 2 | 0 | 1 | 0 | 0 | 1 | 0 | 1 | 0 | 0 | 66,8 | 1,57 | 27,10 | 0 |
| 380 | 0 | 0 | 1 | 0 | 0 | 1 | 0 | 1 | 0 | 0 | 56   | 1,69 | 19,61 | 0 |
| 381 | 2 | 0 | 1 | 0 | 0 | 6 | 0 | 1 | 0 | 0 | 79   | 1,75 | 25,80 | 0 |
| 382 | 1 | 0 | 1 | 0 | 0 | 3 | 1 | 3 | 2 | 0 | 118  | 1,8  | 36,42 | 0 |
| 383 | 1 | 0 | 0 | 0 | 0 | 2 | 0 | 1 | 0 | 0 | 61   | 1,65 | 22,41 | 0 |
| 384 | 0 | 0 | 0 | 0 | 0 | 1 | 0 | 1 | 0 | 0 | 68   | 1,68 | 24,09 | 0 |
| 385 | 0 | 1 | 0 | 0 | 1 | 1 | 0 | 1 | 0 | 0 | 49   | 1,68 | 17,36 | 0 |
| 386 | 0 | 1 | 0 | 0 | 1 | 1 | 0 | 1 | 0 | 0 | 49   | 1,68 | 17,36 | 0 |
| 387 | 0 | 0 | 0 | 0 | 1 | 1 | 1 | 1 | 1 | 0 | 64   | 1,64 | 23,8  | 0 |
| 388 | 0 | 0 | 0 | 0 | 1 | 1 | 1 | 1 | 1 | 0 | 64   | 1,64 | 23,8  | 0 |
| 389 | 1 | 0 | 0 | 0 | 0 | 1 | 1 | 5 | 2 | 2 | 63   | 1,72 | 21,3  | 0 |
| 390 | 1 | 0 | 0 | 0 | 0 | 1 | 1 | 5 | 2 | 2 | 63   | 1,72 | 21,3  | 0 |
| 391 | 2 | 0 | 0 | 0 | 0 | 1 | 1 | 3 | 1 | 1 | 68   | 1,65 | 24,98 | 0 |
| 392 | 2 | 0 | 0 | 0 | 0 | 1 | 1 | 3 | 1 | 1 | 68   | 1,65 | 24,98 | 0 |
| 393 | 1 | 0 | 0 | 1 | 0 | 4 | 1 | 4 | 1 | 2 | 56   | 1,56 | 23,01 | 0 |
| 394 | 1 | 0 | 0 | 1 | 0 | 4 | 1 | 4 | 1 | 2 | 56   | 1,56 | 23,01 | 0 |
| 395 | 2 | 0 | 1 | 0 | 0 | 1 | 1 | 3 | 1 | 1 | 60   | 1,68 | 21,26 | 0 |

|     |   |   |   |   |   |   |   |   |   |   |      |      |       |   |
|-----|---|---|---|---|---|---|---|---|---|---|------|------|-------|---|
| 396 | 2 | 0 | 1 | 0 | 0 | 1 | 1 | 3 | 1 | 1 | 60   | 1,68 | 21,26 | 0 |
| 397 | 2 | 0 | 0 | 0 | 0 | 3 | 1 | 5 | 3 | 1 | 77   | 1,55 | 32,05 | 0 |
| 398 | 2 | 0 | 0 | 0 | 0 | 3 | 1 | 5 | 3 | 1 | 77   | 1,55 | 32,05 | 0 |
| 399 | 0 | 1 | 0 | 0 | 0 | 1 | 1 | 2 | 1 | 0 | 62   | 1,64 | 23,05 | 0 |
| 400 | 0 | 1 | 0 | 0 | 0 | 1 | 1 | 2 | 1 | 0 | 62   | 1,64 | 23,05 | 0 |
| 401 | 2 | 0 | 0 | 0 | 0 | 3 | 1 | 4 | 3 | 0 | 94   | 1,63 | 35,38 | 0 |
| 402 | 2 | 0 | 0 | 0 | 0 | 1 | 1 | 4 | 2 | 1 | 80   | 1,71 | 27,36 | 0 |
| 403 | 2 | 0 | 0 | 0 | 0 | 1 | 1 | 4 | 2 | 1 | 80   | 1,71 | 27,36 | 0 |
| 404 | 1 | 0 | 0 | 0 | 0 | 1 | 1 | 2 | 1 | 0 | 66   | 1,6  | 25,78 | 0 |
| 405 | 1 | 1 | 1 | 0 | 0 | 3 | 0 | 1 | 0 | 0 | 75   | 1,47 | 34,71 | 0 |
| 406 | 1 | 0 | 0 | 0 | 0 | 1 | 1 | 2 | 1 | 0 |      | 1,63 |       | 0 |
| 407 | 1 | 0 | 0 | 0 | 0 | 3 | 0 | 1 | 0 | 0 | 55   | 1,7  | 19,03 | 0 |
| 408 | 1 | 0 | 0 | 0 | 0 | 1 | 1 | 3 | 1 | 1 | 80   | 1,71 | 27,36 | 0 |
| 409 | 1 | 0 | 0 | 0 | 1 | 1 | 0 | 1 | 0 | 0 | 75   | 1,67 | 26,89 | 0 |
| 410 | 2 | 0 | 1 | 0 | 0 | 1 | 1 | 2 | 1 | 0 | 57   | 1,58 | 22,83 | 0 |
| 411 | 1 | 0 | 1 | 0 | 0 | 3 | 1 | 3 | 1 | 1 | 64   | 1,63 | 24,09 | 0 |
| 412 | 0 | 0 | 1 | 0 | 0 | 1 | 1 | 3 | 2 | 0 | 68,5 | 1,74 | 22,63 | 0 |
| 413 | 1 | 1 | 0 | 0 | 0 | 1 | 1 | 2 | 1 | 0 | 50,4 | 1,65 | 18,51 | 0 |
| 414 | 0 | 0 | 0 | 0 | 0 | 1 | 0 | 1 | 0 | 0 | 53   | 1,56 | 21,78 | 0 |
| 415 | 0 | 0 | 0 | 0 | 1 | 1 | 1 | 2 | 1 | 0 | 54   | 1,62 | 20,58 | 0 |
| 416 | 2 | 0 | 0 | 0 | 0 |   | 0 | 1 | 0 | 0 | 58   | 1,63 | 21,83 | 0 |
| 417 | 0 | 0 | 0 | 0 | 0 |   | 0 | 1 | 0 | 0 | 77   | 1,55 | 32,05 | 0 |
| 418 | 0 | 0 | 0 | 0 | 0 | 2 | 0 | 1 | 0 | 0 | 50   | 1,55 | 20,81 | 0 |
| 419 | 0 | 0 | 0 | 0 | 0 | 2 | 0 | 1 | 0 | 0 | 50   | 1,55 | 20,81 | 0 |
| 420 | 0 | 0 | 0 | 0 | 0 | 1 | 0 | 2 | 0 | 1 | 54   | 1,58 | 21,63 | 0 |
| 421 | 0 | 0 | 0 | 0 | 0 | 3 | 0 | 1 | 0 | 0 | 58   | 1,61 | 22,38 | 0 |
| 422 | 0 | 0 | 0 | 0 | 0 | 3 | 0 | 1 | 0 | 0 | 58   | 1,61 | 22,38 | 0 |
| 423 | 0 | 0 | 0 | 0 | 0 | 2 | 0 | 1 | 0 | 0 | 75   | 1,78 | 23,67 | 0 |
| 424 | 1 | 0 | 0 | 0 | 0 | 2 | 0 | 1 | 0 | 0 | 60   | 1,62 | 22,86 | 0 |
| 425 | 1 | 0 | 0 | 0 | 0 | 2 | 0 | 1 | 0 | 0 | 60   | 1,62 | 22,86 | 0 |
| 426 | 2 | 1 | 1 | 0 | 1 | 1 | 0 | 1 | 0 | 0 | 65   | 1,63 | 24,46 | 0 |
| 427 | 1 | 0 | 1 | 0 | 0 | 1 | 0 | 1 | 0 | 0 | 62   | 1,65 | 22,77 | 0 |
| 428 | 1 | 0 | 0 | 0 | 0 | 1 | 1 | 3 | 1 | 1 | 48   | 1,6  | 18,75 | 0 |

|     |   |   |   |   |   |   |   |   |   |   |      |      |       |   |
|-----|---|---|---|---|---|---|---|---|---|---|------|------|-------|---|
| 429 | 1 | 0 | 0 | 0 | 0 | 1 | 1 | 3 | 1 | 1 | 65,7 | 1,69 | 23,00 | 0 |
| 430 | 2 | 0 | 0 | 0 | 1 | 1 | 0 | 1 | 0 | 0 | 78   | 1,62 | 29,72 | 0 |
| 431 | 2 | 0 | 0 | 0 | 1 | 1 | 0 | 1 | 0 | 0 | 78   | 1,62 | 29,72 | 0 |
| 432 | 2 | 0 | 0 | 0 | 1 | 1 | 0 | 1 | 0 | 0 | 61   | 1,7  | 21,11 | 0 |
| 433 | 2 | 1 | 0 | 0 | 1 | 2 | 0 | 1 | 0 | 0 | 64   | 1,69 | 22,41 | 0 |
| 434 | 2 | 1 | 0 | 0 | 1 | 2 | 0 | 1 | 0 | 0 | 64   | 1,69 | 22,41 | 0 |
| 435 | 1 | 0 | 0 | 1 | 0 | 1 | 0 | 1 | 0 | 0 | 76   | 1,7  | 26,30 | 0 |
| 436 | 1 | 0 | 0 | 0 | 0 | 3 | 0 | 1 | 0 | 0 | 52   | 1,57 | 21,10 | 0 |
| 437 | 1 | 0 | 0 | 0 | 1 | 1 | 0 | 2 | 0 | 1 | 60,4 | 1,53 | 25,80 | 0 |
| 438 | 1 | 0 | 1 | 0 | 0 | 6 | 1 | 4 | 2 | 1 | 80   | 1,59 | 31,64 | 0 |
| 439 | 1 | 0 | 1 | 0 | 0 | 6 | 1 | 4 | 2 | 1 | 80   | 1,59 | 31,64 | 0 |
| 440 | 0 | 0 | 0 | 0 | 0 | 2 | 1 | 2 | 1 | 0 | 113  | 1,63 | 42,53 | 0 |
| 441 | 0 | 0 | 0 | 0 | 0 | 2 | 1 | 2 | 1 | 0 | 113  | 1,63 | 42,53 | 0 |
| 442 | 1 | 0 | 0 | 0 | 0 | 1 | 0 | 2 | 0 | 1 | 62   | 1,77 | 19,79 | 0 |
| 443 | 1 | 0 | 0 | 0 | 0 | 1 | 0 | 2 | 0 | 1 | 62   | 1,77 | 19,79 | 0 |
| 444 | 1 | 0 | 1 | 0 | 0 | 1 | 0 | 2 | 0 | 1 | 63   | 1,58 | 25,24 | 0 |
| 445 | 1 | 0 | 1 | 0 | 0 | 1 | 0 | 2 | 0 | 1 | 63   | 1,58 | 25,24 | 0 |
| 446 | 1 | 0 | 0 | 0 | 0 | 1 | 0 | 2 | 0 | 1 | 113  | 1,7  | 39,1  | 0 |
| 447 | 1 | 0 | 0 | 0 | 0 | 1 | 0 | 2 | 0 | 1 | 113  | 1,7  | 39,1  | 0 |
| 448 | 1 | 0 | 1 | 0 | 0 | 1 | 1 | 2 | 1 | 0 | 77   | 1,66 | 27,94 | 0 |
| 449 | 1 | 1 | 1 | 0 | 0 | 2 | 1 | 2 | 1 | 0 | 74   | 1,64 | 27,51 | 0 |
| 450 | 0 | 0 | 0 | 0 | 0 | 1 | 1 | 3 | 1 | 1 | 56   | 1,64 | 20,82 | 0 |
| 451 | 0 | 0 | 0 | 0 | 0 | 1 | 1 | 3 | 1 | 1 | 56   | 1,64 | 20,82 | 0 |
| 452 | 0 | 0 | 0 | 0 | 0 | 1 | 0 | 1 | 0 | 0 | 42   | 1,53 | 17,94 | 0 |
| 453 | 0 | 0 | 0 | 0 | 0 | 2 | 1 | 2 | 1 | 0 | 62   | 1,6  | 24,22 | 0 |
| 454 | 0 | 0 | 0 | 0 | 0 | 2 | 1 | 2 | 1 | 0 | 62   | 1,6  | 24,22 | 0 |
| 455 | 0 | 0 | 0 | 0 | 0 | 2 | 0 | 1 | 0 | 0 | 73   | 1,61 | 28,16 | 0 |
| 456 | 0 | 0 | 0 | 0 | 0 | 2 | 0 | 1 | 0 | 0 | 73   | 1,61 | 28,16 | 0 |
| 457 | 1 | 0 | 0 | 0 | 1 | 1 | 0 | 3 | 0 | 2 | 87   | 1,73 | 29,07 | 0 |
| 458 | 2 | 0 | 0 | 0 | 0 | 1 | 0 | 1 | 0 | 0 | 60   | 1,73 | 20,05 | 0 |
| 459 | 1 | 0 | 1 | 0 | 1 | 1 | 0 | 2 | 0 | 1 | 58   | 1,69 | 20,31 | 0 |
| 460 | 1 | 0 | 1 | 0 | 1 | 1 | 0 | 2 | 0 | 1 | 58   | 1,69 | 20,31 | 0 |
| 461 | 0 | 0 | 0 | 0 | 0 | 2 | 1 | 4 | 3 | 0 | 55   | 1,6  | 21,48 | 0 |

|     |   |   |   |   |   |   |   |   |   |   |    |      |       |   |
|-----|---|---|---|---|---|---|---|---|---|---|----|------|-------|---|
| 462 | 0 | 0 | 0 | 0 | 0 | 2 | 1 | 4 | 3 | 0 | 55 | 1,6  | 21,48 | 0 |
| 463 | 2 | 0 | 0 | 0 | 0 | 3 | 0 | 1 | 0 | 0 | 50 | 1,6  | 19,53 | 0 |
| 464 | 2 | 0 | 0 | 0 | 0 | 3 | 0 | 1 | 0 | 0 | 50 | 1,6  | 19,53 | 0 |
| 465 | 1 | 0 | 0 | 0 | 0 | 1 | 1 | 3 | 1 | 1 | 82 | 1,77 | 26,17 | 0 |
| 466 | 1 | 0 | 0 | 0 | 0 | 1 | 1 | 3 | 1 | 1 | 82 | 1,77 | 26,17 | 0 |
| 467 | 2 | 0 | 1 | 0 | 0 | 1 | 0 | 2 | 0 | 1 | 96 | 1,75 | 31,35 | 0 |
| 468 | 2 | 0 | 0 | 0 | 0 | 1 | 0 | 1 | 0 | 0 | 68 | 1,68 | 24,09 | 0 |
| 469 | 2 | 0 | 0 | 0 | 0 | 1 | 0 | 1 | 0 | 0 | 68 | 1,68 | 24,09 | 0 |
| 470 | 0 | 0 | 0 | 0 | 0 |   | 1 | 4 | 3 | 0 | 69 | 1,71 | 23,6  | 0 |
| 471 | 0 | 0 | 0 | 0 | 0 |   | 1 | 4 | 3 | 0 | 69 | 1,71 | 23,6  | 0 |
| 472 | 0 | 0 | 0 | 0 | 0 |   | 0 | 2 | 0 | 1 | 53 | 1,7  | 18,34 | 0 |
| 473 | 0 | 0 | 0 | 0 | 0 |   | 0 | 2 | 0 | 1 | 53 | 1,7  | 18,34 | 0 |
| 474 | 0 | 0 | 0 | 0 | 0 | 6 | 1 | 3 | 2 | 0 | 48 | 1,63 | 18,07 | 0 |
| 475 | 0 | 0 | 0 | 0 | 0 | 6 | 1 | 3 | 2 | 0 | 48 | 1,63 | 18,07 | 0 |
| 476 | 0 | 0 | 0 | 0 | 0 | 1 | 0 | 1 | 0 | 0 | 50 | 1,6  | 19,53 | 0 |
| 477 | 0 | 0 | 0 | 0 | 0 | 3 | 0 | 2 | 0 | 1 | 68 | 1,54 | 28,67 | 0 |
| 478 | 0 | 0 | 0 | 0 | 0 | 3 | 0 | 2 | 0 | 1 | 68 | 1,54 | 28,67 | 0 |
| 479 | 0 | 0 | 0 | 0 | 0 | 1 | 0 | 1 | 0 | 0 | 50 | 1,6  | 19,53 | 0 |
| 480 | 0 | 0 | 1 | 0 | 0 | 3 | 1 | 2 | 1 | 0 | 62 | 1,62 | 23,62 | 0 |
| 481 | 0 | 0 | 0 | 0 | 0 | 3 | 1 | 3 | 2 | 0 | 49 | 1,6  | 19,14 | 0 |
| 482 | 0 | 0 | 0 | 0 | 0 | 3 | 1 | 2 | 1 | 0 | 54 | 1,71 | 18,47 | 0 |
| 483 | 0 | 0 | 0 | 0 | 0 | 3 | 1 | 3 | 2 | 0 | 49 | 1,6  | 19,14 | 0 |
| 484 | 0 | 0 | 0 | 0 | 0 | 1 | 0 | 1 | 0 | 0 | 64 | 1,58 | 25,64 | 0 |
| 485 | 0 | 0 | 0 | 0 | 0 | 1 | 0 | 1 | 0 | 0 | 54 | 1,63 | 20,32 | 0 |
| 486 | 0 | 0 | 1 | 0 | 0 | 2 | 1 | 2 | 1 | 0 | 58 | 1,59 | 22,94 | 0 |
| 487 | 0 | 0 | 0 | 0 | 0 | 1 | 0 | 1 | 0 | 0 | 54 | 1,63 | 20,32 | 0 |
| 488 | 0 | 0 | 0 | 0 | 0 | 1 | 0 | 1 | 0 | 0 | 46 | 1,6  | 17,97 | 0 |
| 489 | 0 | 0 | 0 | 0 | 0 | 1 | 0 | 1 | 0 | 0 | 46 | 1,6  | 17,97 | 0 |
| 490 | 0 | 0 | 0 | 0 | 0 | 2 | 0 | 2 | 0 | 1 | 70 | 1,65 | 25,71 | 0 |
| 491 | 0 | 0 | 0 | 0 | 0 | 2 | 0 | 2 | 0 | 1 | 70 | 1,65 | 25,71 | 0 |
| 492 | 0 | 0 | 1 | 0 | 0 | 1 | 1 | 5 | 4 | 1 | 66 | 1,7  | 22,84 | 0 |
| 493 | 0 | 0 | 1 | 0 | 0 | 1 | 1 | 5 | 4 | 1 | 66 | 1,7  | 22,84 | 0 |
| 494 | 0 | 1 | 0 | 0 | 0 | 1 | 1 | 2 | 1 | 0 | 52 | 1,58 | 20,83 | 0 |

|     |   |   |   |   |   |   |   |   |   |   |    |      |       |   |
|-----|---|---|---|---|---|---|---|---|---|---|----|------|-------|---|
| 495 | 0 | 0 | 0 | 0 | 0 | 1 | 1 | 3 | 1 | 1 | 66 | 1,63 | 24,84 | 0 |
| 496 | 0 | 0 | 0 | 0 | 0 | 3 | 1 | 2 | 1 | 0 | 57 | 1,67 | 20,44 | 0 |
| 497 | 0 | 0 | 1 | 0 | 0 | 1 | 0 | 1 | 0 | 0 | 60 | 1,65 | 22,04 | 0 |
| 498 | 0 | 1 | 0 | 0 | 0 | 1 | 1 | 2 | 1 | 0 | 52 | 1,58 | 20,83 | 0 |
| 499 | 0 | 0 | 0 | 0 | 0 | 3 | 1 | 2 | 1 | 0 | 57 | 1,67 | 20,44 | 0 |
| 500 | 0 | 0 | 0 | 0 | 0 | 1 | 1 | 3 | 1 | 1 | 66 | 1,63 | 24,84 | 0 |
| 501 | 0 | 0 | 1 | 0 | 0 | 1 | 0 | 1 | 0 | 0 | 60 | 1,65 | 22,04 | 0 |
| 502 | 0 | 0 | 0 | 0 | 0 | 1 | 0 | 1 | 0 | 0 | 53 | 1,59 | 20,96 | 0 |
| 503 | 0 | 0 | 0 | 0 | 0 | 1 | 0 | 2 | 0 | 1 | 64 | 1,64 | 23,8  | 0 |
| 504 | 0 | 0 | 0 | 0 | 0 | 1 | 0 | 2 | 0 | 1 | 64 | 1,64 | 23,8  | 0 |
| 505 | 0 | 0 | 0 | 0 | 0 | 1 | 0 | 1 | 0 | 0 | 53 | 1,59 | 20,96 | 0 |
| 506 | 0 | 0 | 0 | 0 | 0 | 1 | 0 | 1 | 0 | 0 | 58 | 1,6  | 22,66 | 0 |
| 507 | 0 | 0 | 0 | 0 | 0 | 1 | 0 | 1 | 0 | 0 | 58 | 1,6  | 22,66 | 0 |
| 508 | 0 | 0 | 0 | 0 | 0 | 2 | 0 | 1 | 0 | 0 | 60 | 1,68 | 21,26 | 0 |
| 509 | 0 | 0 | 0 | 0 | 0 | 2 | 0 | 1 | 0 | 0 | 60 | 1,68 | 21,26 | 0 |
| 510 | 0 | 0 | 0 | 0 | 0 | 1 | 0 | 2 | 0 | 1 | 57 | 1,69 | 19,96 | 0 |
| 511 | 0 | 0 | 0 | 0 | 1 | 1 | 0 | 1 | 0 | 0 | 68 | 1,76 | 21,95 | 0 |
| 512 | 0 | 0 | 0 | 0 | 1 | 1 | 0 | 1 | 0 | 0 | 68 | 1,76 | 21,95 | 0 |
| 513 | 0 | 0 | 0 | 0 | 0 | 2 | 1 | 3 | 1 | 1 | 74 | 1,61 | 28,55 | 0 |
| 514 | 0 | 0 | 0 | 0 | 0 | 2 | 1 | 3 | 1 | 1 | 74 | 1,61 | 28,55 | 0 |
| 515 | 0 | 0 | 0 | 0 | 0 | 1 | 1 | 3 | 1 | 1 | 74 | 1,67 | 26,53 | 0 |
| 516 | 0 | 0 | 0 | 0 | 0 | 1 | 1 | 3 | 1 | 1 | 74 | 1,67 | 26,53 | 0 |
| 517 | 0 | 0 | 0 | 0 | 0 | 1 | 1 | 2 | 1 | 0 | 52 | 1,56 | 21,37 | 0 |
| 518 | 0 | 0 | 0 | 0 | 0 | 2 | 0 | 1 | 0 | 0 | 67 | 1,67 | 24,02 | 0 |
| 519 | 0 | 0 | 0 | 0 | 0 | 2 | 1 | 2 | 1 | 0 | 70 | 1,68 | 24,8  | 0 |
| 520 | 0 | 0 | 0 | 0 | 0 | 2 | 1 | 2 | 1 | 0 | 70 | 1,68 | 24,8  | 0 |
| 521 | 0 | 0 | 0 | 0 | 0 | 2 | 1 | 3 | 2 | 0 | 57 | 1,59 | 22,55 | 0 |
| 522 | 0 | 0 | 0 | 0 | 0 | 2 | 1 | 3 | 2 | 0 | 57 | 1,59 | 22,55 | 0 |
| 523 | 0 | 0 | 0 | 0 | 0 | 1 | 1 | 2 | 1 | 0 | 58 | 1,6  | 22,66 | 0 |
| 524 | 0 | 0 | 0 | 0 | 0 | 1 | 1 | 2 | 1 | 0 | 58 | 1,6  | 22,66 | 0 |
| 525 | 0 | 0 | 0 | 0 | 0 | 2 | 1 | 4 | 3 | 0 | 57 | 1,6  | 22,27 | 0 |
| 526 | 0 | 0 | 0 | 0 | 0 | 1 | 1 | 2 | 1 | 0 | 63 | 1,73 | 21,05 | 0 |
| 527 | 0 | 0 | 0 | 0 | 0 | 1 | 0 | 1 | 0 | 0 | 94 | 1,59 | 37,18 | 0 |



|     |   |   |   |   |   |   |   |   |   |   |      |      |       |   |
|-----|---|---|---|---|---|---|---|---|---|---|------|------|-------|---|
| 528 | 0 | 0 | 0 | 0 | 0 | 2 | 1 | 4 | 3 | 0 | 57   | 1,6  | 22,27 | 0 |
| 529 | 0 | 0 | 0 | 0 | 0 | 1 | 1 | 2 | 1 | 0 | 63   | 1,73 | 21,05 | 0 |
| 530 | 0 | 0 | 0 | 0 | 1 | 1 | 0 | 2 | 0 | 1 | 57   | 1,63 | 21,45 | 0 |
| 531 | 0 | 0 | 0 | 0 | 0 | 6 | 0 | 1 | 0 | 0 | 53   | 1,62 | 20,2  | 0 |
| 532 | 0 | 0 | 0 | 0 | 1 | 1 | 0 | 2 | 0 | 1 | 57   | 1,63 | 21,45 | 0 |
| 533 | 0 | 0 | 0 | 0 | 0 | 6 | 0 | 1 | 0 | 0 | 53   | 1,62 | 20,2  | 0 |
| 534 | 0 | 0 | 0 | 0 | 1 | 1 | 0 | 1 | 0 | 0 | 60   | 1,76 | 19,37 | 0 |
| 535 | 0 | 0 | 0 | 0 | 0 | 1 | 1 | 2 | 1 | 0 | 84   | 1,68 | 29,76 | 0 |
| 536 | 0 | 0 | 0 | 0 | 0 | 1 | 1 | 2 | 1 | 0 | 84   | 1,68 | 29,76 | 0 |
| 537 | 0 | 0 | 0 | 0 | 0 | 1 | 0 | 1 | 0 | 0 |      | 1,6  |       | 0 |
| 538 | 0 | 0 | 0 | 0 | 0 | 1 | 0 | 2 | 0 | 1 | 60   | 1,68 | 21,26 | 0 |
| 539 | 0 | 0 | 0 | 0 | 0 | 1 | 1 | 3 | 2 | 0 | 56   | 1,6  | 21,88 | 0 |
| 540 | 0 | 0 | 0 | 0 | 0 | 1 | 0 | 2 | 0 | 1 | 60   | 1,68 | 21,26 | 0 |
| 541 | 0 | 0 | 0 | 0 | 0 | 1 | 0 | 2 | 0 | 1 | 58,8 | 1,72 | 19,88 | 0 |
| 542 | 0 | 0 | 0 | 0 | 0 | 1 | 0 | 2 | 0 | 1 | 49   | 1,55 | 20,40 | 0 |
| 543 | 0 | 0 | 0 | 0 | 0 | 1 | 1 | 2 | 1 | 0 | 56   | 1,65 | 20,57 | 0 |
| 544 | 0 | 0 | 0 | 0 | 0 | 1 | 1 | 2 | 1 | 0 | 56   | 1,65 | 20,57 | 0 |
| 545 | 0 | 0 | 0 | 0 | 0 | 2 | 1 | 3 | 2 | 0 | 50   | 1,55 | 20,81 | 0 |
| 546 | 0 | 0 | 0 | 0 | 0 | 2 | 1 | 3 | 2 | 0 | 50   | 1,55 | 20,81 | 0 |
| 547 | 0 | 0 | 0 | 0 | 0 | 1 | 0 | 1 | 0 | 0 | 51   | 1,65 | 18,73 | 0 |
| 548 | 0 | 0 | 0 | 0 | 1 | 1 | 1 | 2 | 1 | 0 | 74   | 1,65 | 27,18 | 0 |
| 549 | 0 | 0 | 0 | 0 | 0 | 4 | 1 | 6 | 4 | 1 | 58   | 1,58 | 23,23 | 0 |
| 550 | 0 | 0 | 0 | 0 | 0 | 1 | 0 | 1 | 0 | 0 | 60   | 1,7  | 20,76 | 0 |
| 551 | 0 | 0 | 0 | 0 | 0 | 4 | 0 | 3 | 0 | 2 | 44   | 1,58 | 17,63 | 0 |
| 552 | 0 | 0 | 0 | 0 | 0 | 1 | 0 | 1 | 0 | 0 | 60   | 1,7  | 20,76 | 0 |
| 553 | 0 | 0 | 0 | 0 | 0 | 2 | 1 | 2 | 1 | 0 | 87   | 1,7  | 30,1  | 0 |
| 554 | 0 | 0 | 0 | 0 | 0 | 2 | 1 | 2 | 1 | 0 | 87   | 1,7  | 30,1  | 0 |
| 555 | 0 | 0 | 0 | 0 | 0 | 1 | 1 | 3 | 1 | 1 | 63   | 1,67 | 22,59 | 0 |
| 556 | 0 | 0 | 0 | 0 | 0 | 1 | 1 | 3 | 1 | 1 | 63   | 1,67 | 22,59 | 0 |
| 557 | 0 | 0 | 0 | 0 | 0 | 1 | 0 | 1 | 0 | 0 | 75,2 | 1,75 | 24,56 | 0 |
| 558 | 0 | 0 | 0 | 0 | 1 | 1 | 1 | 3 | 1 | 1 | 64   | 1,75 | 20,9  | 0 |
| 559 | 0 | 0 | 0 | 0 | 0 | 1 | 1 | 2 | 1 | 0 | 56   | 1,68 | 19,84 | 0 |
| 560 | 0 | 0 | 0 | 0 | 0 | 1 | 1 | 2 | 1 | 0 | 56   | 1,68 | 19,84 | 0 |

|     |   |   |   |   |   |   |   |   |   |   |      |      |       |   |
|-----|---|---|---|---|---|---|---|---|---|---|------|------|-------|---|
| 561 | 0 | 0 | 0 | 0 | 0 | 1 | 0 | 1 | 0 | 0 | 64   | 1,6  | 25    | 0 |
| 562 | 0 | 0 | 0 | 0 | 0 | 1 | 0 | 1 | 0 | 0 | 64   | 1,6  | 25    | 0 |
| 563 | 0 | 1 | 0 | 0 | 0 | 3 | 1 | 2 | 1 | 0 | 93   | 1,68 | 32,95 | 0 |
| 564 | 0 | 1 | 0 | 0 | 0 | 3 | 1 | 2 | 1 | 0 | 93   | 1,68 | 32,95 | 0 |
| 565 | 0 | 0 | 0 | 0 | 0 | 3 | 1 | 3 | 2 | 0 | 53   | 1,68 | 18,78 | 0 |
| 566 | 0 | 0 | 0 | 0 | 0 | 2 | 1 | 2 | 1 | 0 | 70   | 1,65 | 25,71 | 0 |
| 567 | 0 | 0 | 0 | 0 | 0 | 3 | 1 | 3 | 2 | 0 | 53   | 1,68 | 18,78 | 0 |
| 568 | 0 | 0 | 0 | 0 | 0 | 2 | 1 | 2 | 1 | 0 | 70   | 1,65 | 25,71 | 0 |
| 569 | 0 | 0 | 0 | 0 | 0 | 1 | 1 | 2 | 1 | 0 | 68   | 1,6  | 26,56 | 0 |
| 570 | 0 | 0 | 0 | 0 | 0 | 1 | 0 | 1 | 0 | 0 | 69   | 1,63 | 25,97 | 0 |
| 571 | 0 | 0 | 0 | 0 | 0 | 1 | 0 | 1 | 0 | 0 | 64,5 | 1,75 | 21,06 | 0 |
| 572 | 0 | 0 | 0 | 0 | 0 | 1 | 0 | 1 | 0 | 0 | 69   | 1,63 | 25,97 | 0 |
| 573 | 0 | 0 | 0 | 0 | 0 | 4 | 0 | 2 | 0 | 1 | 60   | 1,6  | 23,44 | 0 |
| 574 | 0 | 0 | 0 | 0 | 0 | 1 | 1 | 5 | 1 | 3 | 46   | 1,62 | 17,53 | 0 |
| 575 | 0 | 0 | 0 | 0 | 0 | 3 | 1 | 3 | 1 | 1 | 69   | 1,53 | 29,48 | 0 |
| 576 | 0 | 0 | 0 | 0 | 0 | 1 | 1 | 5 | 1 | 3 | 46   | 1,62 | 17,53 | 0 |
| 577 | 0 | 0 | 0 | 0 | 0 | 2 | 1 | 4 | 2 | 1 | 49   | 1,51 | 21,49 | 0 |
| 578 | 0 | 0 | 0 | 0 | 0 | 3 | 1 | 3 | 1 | 1 | 69   | 1,53 | 29,48 | 0 |
| 579 | 0 | 0 | 0 | 0 | 0 | 1 | 1 | 3 | 1 | 1 | 57   | 1,59 | 22,55 | 0 |
| 580 | 0 | 0 | 0 | 0 | 0 | 1 | 1 | 3 | 1 | 1 | 57   | 1,59 | 22,55 | 0 |
| 581 | 0 | 0 | 0 | 0 | 0 | 2 | 1 | 4 | 2 | 1 | 49   | 1,51 | 21,49 | 0 |
| 582 | 0 | 0 | 0 | 0 | 1 | 1 | 1 | 3 | 2 | 0 | 51   | 1,61 | 19,68 | 0 |
| 583 | 0 | 0 | 0 | 0 | 1 | 1 | 1 | 3 | 2 | 0 | 51   | 1,61 | 19,68 | 0 |
| 584 | 0 | 0 | 0 | 0 | 0 | 1 | 0 | 1 | 0 | 0 | 80   | 1,65 | 29,38 | 0 |
| 585 | 0 | 0 | 0 | 0 | 0 | 1 | 0 | 1 | 0 | 0 | 80   | 1,65 | 29,38 | 0 |
| 586 | 0 | 0 | 0 | 0 | 0 | 1 | 0 | 1 | 0 | 0 | 80   | 1,65 | 29,38 | 0 |
| 587 | 0 | 0 | 0 | 0 | 1 | 1 | 0 | 1 | 0 | 0 | 56   | 1,66 | 20,32 | 0 |
| 588 | 0 | 0 | 0 | 0 | 1 | 1 | 0 | 1 | 0 | 0 | 56   | 1,66 | 20,32 | 0 |
| 589 | 0 | 0 | 0 | 0 | 0 | 1 | 1 | 3 | 1 | 1 | 47   | 1,58 | 18,83 | 0 |
| 590 | 0 | 0 | 0 | 0 | 0 | 1 | 1 | 2 | 1 | 0 | 61   | 1,67 | 21,87 | 0 |
| 591 | 0 | 0 | 0 | 0 | 0 | 1 | 1 | 2 | 1 | 0 | 61   | 1,67 | 21,87 | 0 |
| 592 | 0 | 0 | 0 | 0 | 0 | 1 | 0 | 1 | 0 | 0 | 65   | 1,68 | 23,03 | 0 |
| 593 | 0 | 0 | 0 | 0 | 1 | 1 | 1 | 2 | 1 | 0 | 71   | 1,71 | 24,28 | 0 |

|     |   |   |   |   |   |   |   |   |   |   |      |      |       |   |
|-----|---|---|---|---|---|---|---|---|---|---|------|------|-------|---|
| 594 | 0 | 0 | 0 | 0 | 0 | 1 | 1 | 3 | 1 | 1 | 69   | 1,65 | 25,34 | 0 |
| 595 | 0 | 0 | 0 | 0 | 0 | 1 | 1 | 3 | 1 | 1 | 69   | 1,65 | 25,34 | 0 |
| 596 | 0 | 0 | 0 | 0 | 0 | 1 | 1 | 2 | 1 | 0 | 80   | 1,81 | 24,42 | 0 |
| 597 | 0 | 0 | 0 | 0 | 0 | 1 | 1 | 3 | 1 | 1 | 47   | 1,58 | 18,83 | 0 |
| 598 | 0 | 0 | 0 | 0 | 0 | 1 | 0 | 1 | 0 | 0 | 65   | 1,68 | 23,03 | 0 |
| 599 | 0 | 0 | 0 | 0 | 0 | 2 | 1 | 2 | 1 | 0 | 63   | 1,74 | 20,81 | 0 |
| 600 | 0 | 0 | 0 | 0 | 1 | 1 | 1 | 2 | 1 | 0 | 71   | 1,71 | 24,28 | 0 |
| 601 | 0 | 0 | 0 | 0 | 0 | 1 | 1 | 2 | 1 | 0 | 115  | 1,69 | 40,26 | 0 |
| 602 | 0 | 0 | 0 | 0 | 0 | 2 | 1 | 2 | 1 | 0 | 63   | 1,74 | 20,81 | 0 |
| 603 | 0 | 0 | 0 | 0 | 0 | 1 | 1 | 2 | 1 | 0 | 115  | 1,69 | 40,26 | 0 |
| 604 | 0 | 0 | 0 | 0 | 0 | 6 | 1 | 5 | 3 | 1 | 60   | 1,66 | 21,77 | 0 |
| 605 | 0 | 0 | 1 | 0 | 0 | 2 | 0 | 1 | 0 | 0 | 56   | 1,68 | 19,84 | 0 |
| 606 | 0 | 0 | 0 | 0 | 0 | 1 | 0 | 1 | 0 | 0 | 69   | 1,7  | 23,88 | 0 |
| 607 | 0 | 0 | 0 | 0 | 0 | 6 | 1 | 5 | 3 | 1 | 60   | 1,66 | 21,77 | 0 |
| 608 | 0 | 0 | 1 | 0 | 0 | 2 | 0 | 1 | 0 | 0 | 56   | 1,68 | 19,84 | 0 |
| 609 | 0 | 0 | 0 | 0 | 0 | 1 | 0 | 1 | 0 | 0 | 1,69 |      |       | 0 |
| 610 | 0 | 0 | 0 | 0 | 0 | 1 | 0 | 1 | 0 | 0 | 69   | 1,7  | 23,88 | 0 |
| 611 | 0 | 0 | 0 | 0 | 0 | 1 | 0 | 1 | 0 | 0 | 76   | 1,69 | 26,61 | 0 |
| 612 | 0 | 0 | 0 | 0 | 0 | 1 | 0 | 1 | 0 | 0 | 76   | 1,69 | 26,61 | 0 |
| 613 | 0 | 0 | 0 | 0 | 1 | 1 | 0 | 1 | 0 | 0 | 71   | 1,7  | 24,57 | 0 |
| 614 | 0 | 0 | 0 | 0 | 1 | 1 | 0 | 1 | 0 | 0 | 71   | 1,7  | 24,57 | 0 |
| 615 | 0 | 0 | 0 | 0 | 0 | 1 | 0 | 1 | 0 | 0 | 86   | 1,7  | 29,76 | 0 |
| 616 | 0 | 0 | 0 | 0 | 0 | 1 | 1 | 3 | 1 | 1 | 92   | 1,75 | 30,04 | 0 |
| 617 | 0 | 0 | 0 | 0 | 0 | 1 | 1 | 3 | 2 | 0 | 62   | 1,72 | 20,96 | 0 |
| 618 | 0 | 0 | 0 | 0 | 0 | 1 | 1 | 3 | 2 | 0 | 62   | 1,72 | 20,96 | 0 |
| 619 | 0 | 0 | 0 | 0 | 0 | 1 | 0 | 1 | 0 | 0 | 86   | 1,7  | 29,76 | 0 |
| 620 | 0 | 0 | 0 | 0 | 0 | 6 | 0 | 1 | 0 | 0 | 57   | 1,65 | 20,94 | 0 |
| 621 | 0 | 0 | 0 | 0 | 0 | 6 | 1 | 3 | 2 | 0 | 80   | 1,6  | 31,25 | 0 |
| 622 | 0 | 0 | 0 | 0 | 1 | 1 | 1 | 3 | 2 | 0 | 72   | 1,69 | 25,21 | 0 |
| 623 | 0 | 0 | 0 | 0 | 0 | 6 | 1 | 3 | 2 | 0 | 80   | 1,6  | 31,25 | 0 |
| 624 | 0 | 1 | 0 | 0 | 0 | 1 | 1 | 2 | 1 | 0 | 88   | 1,58 | 35,25 | 0 |
| 625 | 0 | 1 | 0 | 0 | 0 | 1 | 1 | 2 | 1 | 0 | 88   | 1,58 | 35,25 | 0 |
| 626 | 0 | 0 | 0 | 0 | 0 | 1 | 1 | 2 | 1 | 0 | 85   | 1,74 | 28,08 | 0 |

|     |   |   |   |   |   |   |   |   |   |   |     |      |       |   |
|-----|---|---|---|---|---|---|---|---|---|---|-----|------|-------|---|
| 627 | 0 | 0 | 0 | 0 | 1 | 1 | 1 | 3 | 2 | 0 | 72  | 1,69 | 25,21 | 0 |
| 628 | 0 | 0 | 0 | 0 | 0 | 1 | 1 | 5 | 1 | 3 | 106 | 1,74 | 35,01 | 0 |
| 629 | 0 | 0 | 0 | 0 | 0 | 1 | 0 | 1 | 0 | 0 | 66  | 1,61 | 25,46 | 0 |
| 630 | 0 | 0 | 0 | 0 | 0 | 1 | 0 | 1 | 0 | 0 | 78  | 1,76 | 25,18 | 0 |
| 631 | 0 | 0 | 0 | 0 | 0 | 1 | 0 | 1 | 0 | 0 | 66  | 1,61 | 25,46 | 0 |
| 632 | 0 | 0 | 0 | 0 | 0 | 1 | 1 | 5 | 1 | 3 | 106 | 1,74 | 35,01 | 0 |
| 633 | 0 | 0 | 0 | 0 | 0 | 1 | 1 | 5 | 1 | 3 | 106 | 1,74 | 35,01 | 0 |
| 634 | 0 | 0 | 0 | 0 | 0 | 2 | 0 | 1 | 0 | 0 | 72  | 1,7  | 24,91 | 0 |
| 635 | 0 | 0 | 0 | 0 | 0 | 5 | 0 | 1 | 0 | 0 | 68  | 1,5  | 30,22 | 0 |
| 636 | 0 | 0 | 0 | 0 | 0 | 2 | 0 | 1 | 0 | 0 | 72  | 1,7  | 24,91 | 0 |
| 637 | 0 | 1 | 1 | 0 | 0 | 3 | 1 | 3 | 2 | 0 | 89  | 1,67 | 31,91 | 0 |
| 638 | 0 | 1 | 1 | 0 | 0 | 3 | 1 | 3 | 2 | 0 | 89  | 1,67 | 31,91 | 0 |
| 639 | 0 | 0 | 0 | 0 | 0 | 1 | 1 | 3 | 1 | 1 | 102 | 1,78 | 32,19 | 0 |
| 640 | 0 | 0 | 1 | 0 | 1 | 3 | 0 | 1 | 0 | 0 | 66  | 1,58 | 26,44 | 0 |
| 641 | 0 | 0 | 0 | 0 | 0 | 1 | 1 | 3 | 1 | 1 | 102 | 1,78 | 32,19 | 0 |
| 642 | 0 | 0 | 1 | 0 | 1 | 3 | 0 | 1 | 0 | 0 | 66  | 1,58 | 26,44 | 0 |
| 643 | 0 | 0 | 0 | 0 | 0 | 1 | 0 | 1 | 0 | 0 | 62  | 1,81 | 18,92 | 0 |
| 644 | 2 | 1 | 0 | 0 | 0 | 1 | 0 | 1 | 0 | 0 | 72  | 1,61 | 27,78 | 0 |
| 645 | 2 | 1 | 0 | 0 | 0 | 1 | 0 | 1 | 0 | 0 | 72  | 1,61 | 27,78 | 0 |
| 646 | 2 | 0 | 0 | 0 | 0 | 1 | 0 | 1 | 0 | 0 | 72  | 1,6  | 28,12 | 0 |
| 647 | 2 | 0 | 0 | 0 | 0 | 1 | 0 | 1 | 0 | 0 | 72  | 1,6  | 28,12 | 0 |
| 648 | 1 | 0 | 0 | 0 | 1 | 1 | 1 | 2 | 1 | 0 | 72  | 1,68 | 25,51 | 0 |
| 649 | 1 | 0 | 0 | 0 | 1 | 1 | 1 | 2 | 1 | 0 | 72  | 1,68 | 25,51 | 0 |
| 650 | 1 | 0 | 0 | 0 | 0 | 1 | 1 | 2 | 1 | 0 | 64  | 1,69 | 22,41 | 0 |
| 651 | 1 | 0 | 1 | 0 | 0 | 6 | 1 | 2 | 1 | 0 | 67  | 1,6  | 26,17 | 0 |
| 652 | 1 | 0 | 0 | 0 | 0 | 1 | 0 | 1 | 0 | 0 | 70  | 1,69 | 24,51 | 0 |
| 653 | 1 | 0 | 0 | 0 | 0 | 1 | 0 | 1 | 0 | 0 | 70  | 1,69 | 24,51 | 0 |
| 654 | 1 | 0 | 0 | 0 | 0 | 1 | 0 | 1 | 0 | 0 | 49  | 1,63 | 18,44 | 0 |
| 655 | 1 | 0 | 0 | 0 | 0 | 1 | 0 | 1 | 0 | 0 | 49  | 1,63 | 18,44 | 0 |
| 656 | 1 | 0 | 0 | 0 | 0 | 1 | 0 | 1 | 0 | 0 | 65  | 1,7  | 22,49 | 0 |
| 657 | 1 | 0 | 0 | 0 | 0 | 2 | 1 | 2 | 1 | 0 | 54  | 1,56 | 22,19 | 0 |
| 658 | 2 | 0 | 0 | 0 | 0 | 3 | 1 | 3 | 1 | 1 | 49  | 1,63 | 18,44 | 0 |
| 659 | 2 | 0 | 0 | 0 | 0 | 3 | 1 | 3 | 1 | 1 | 49  | 1,63 | 18,44 | 0 |

|     |   |   |   |   |   |   |   |   |   |   |      |      |       |   |
|-----|---|---|---|---|---|---|---|---|---|---|------|------|-------|---|
| 660 | 2 | 0 | 0 | 0 | 1 | 1 | 1 | 3 | 1 | 1 | 65,5 | 1,75 | 21,39 | 0 |
| 661 | 1 | 0 | 1 | 0 | 0 | 6 | 1 | 3 | 2 | 0 | 70   | 1,65 | 25,71 | 0 |
| 662 | 1 | 0 | 1 | 0 | 0 | 6 | 1 | 3 | 2 | 0 | 70   | 1,65 | 25,71 | 0 |
| 663 | 2 | 0 | 0 | 0 | 1 | 1 | 0 | 1 | 0 | 0 | 70   | 1,7  | 24,22 | 0 |
| 664 | 2 | 0 | 0 | 0 | 1 | 1 | 0 | 1 | 0 | 0 | 70   | 1,7  | 24,22 | 0 |
| 665 | 1 | 0 | 0 | 0 | 0 | 1 | 1 | 6 | 2 | 4 | 90   | 1,74 | 29,73 | 1 |
| 666 | 1 | 0 | 0 | 0 | 0 | 1 | 0 | 3 | 0 | 2 | 68   | 1,7  | 23,53 | 0 |
| 667 | 1 | 0 | 0 | 0 | 0 | 1 | 0 | 3 | 0 | 2 | 68   | 1,7  | 23,53 | 0 |
| 668 | 1 | 0 | 0 | 0 | 0 | 1 | 0 | 4 | 0 | 3 | 64   | 1,75 | 20,9  | 0 |
| 669 | 1 | 0 | 0 | 0 | 0 | 1 | 0 | 4 | 0 | 3 | 64   | 1,75 | 20,9  | 0 |
| 670 | 1 | 0 | 1 | 0 | 0 | 1 | 0 | 1 | 0 | 0 | 72,5 | 1,73 | 24,22 | 0 |
| 671 | 1 | 0 | 0 | 0 | 1 | 3 | 0 | 1 | 0 | 0 | 58   | 1,69 | 20,31 | 0 |
| 672 | 1 | 0 | 0 | 0 | 1 | 3 | 0 | 1 | 0 | 0 | 58   | 1,69 | 20,31 | 0 |
| 673 | 2 | 0 | 1 | 0 | 0 | 1 | 1 | 2 | 1 | 0 | 83   | 1,61 | 32,02 | 0 |
| 674 | 1 | 0 | 0 | 0 | 0 | 3 | 0 | 1 | 0 | 1 | 60   | 1,7  | 20,76 | 0 |
| 675 | 1 | 0 | 0 | 0 | 0 | 3 | 0 | 1 | 0 | 1 | 60   | 1,7  | 20,76 | 0 |
| 676 | 1 | 0 | 0 | 0 | 0 | 1 | 0 | 1 | 0 | 0 | 58   | 1,72 | 19,61 | 0 |
| 677 | 2 | 0 | 1 | 0 | 1 | 1 | 0 | 1 | 0 | 0 | 59   | 1,68 | 20,9  | 0 |
| 678 | 2 | 1 | 0 | 0 | 0 | 1 | 1 | 4 | 1 | 2 | 80   | 1,65 | 29,38 | 0 |
| 679 | 2 | 1 | 0 | 0 | 0 | 1 | 1 | 4 | 1 | 2 | 80   | 1,65 | 29,38 | 0 |
| 680 | 2 | 0 | 0 | 0 | 0 | 1 | 1 | 3 | 2 | 0 | 62   | 1,69 | 21,71 | 0 |
| 681 | 1 | 0 | 0 | 0 | 0 | 3 | 1 | 2 | 1 | 0 | 83   | 1,62 | 31,63 | 0 |
| 682 | 1 | 0 | 0 | 0 | 0 | 3 | 1 | 3 | 2 | 0 | 77   | 1,65 | 28,28 | 0 |
| 683 | 2 | 1 | 0 | 0 | 1 | 1 | 0 | 1 | 0 | 0 | 65   | 1,62 | 24,77 | 0 |
| 684 | 2 | 1 | 0 | 0 | 1 | 1 | 0 | 1 | 0 | 0 | 65   | 1,62 | 24,77 | 0 |
| 685 | 1 | 0 | 0 | 0 | 0 | 1 | 1 | 3 | 1 | 1 | 85   | 1,62 | 32,39 | 0 |
| 686 | 1 | 0 | 0 | 0 | 0 | 1 | 1 | 3 | 1 | 1 | 85   | 1,62 | 32,39 | 0 |
| 687 | 1 | 0 | 0 | 0 | 0 | 3 | 0 | 2 | 0 | 1 | 60   | 1,72 | 20,28 | 0 |
| 688 | 1 | 0 | 0 | 0 | 0 | 3 | 0 | 2 | 0 | 1 | 60   | 1,72 | 20,28 | 0 |
| 689 | 2 | 0 | 1 | 0 | 0 | 3 | 1 | 3 | 2 | 0 | 51   | 1,66 | 18,51 | 0 |
| 690 | 2 | 0 | 0 | 0 | 0 | 1 | 0 | 1 | 0 | 0 | 55   | 1,6  | 21,48 | 0 |
| 691 | 2 | 0 | 0 | 0 | 0 | 1 | 0 | 1 | 0 | 0 | 55   | 1,6  | 21,48 | 0 |
| 692 | 1 | 0 | 0 | 0 | 1 | 2 | 0 | 3 | 0 | 2 | 63   | 1,72 | 21,3  | 0 |

|     |   |   |   |   |   |   |   |   |   |   |      |      |       |   |
|-----|---|---|---|---|---|---|---|---|---|---|------|------|-------|---|
| 693 | 1 | 0 | 0 | 0 | 1 | 2 | 0 | 3 | 0 | 2 | 63   | 1,72 | 21,3  | 0 |
| 694 | 1 | 0 | 0 | 0 | 1 | 2 | 0 | 3 | 0 | 2 | 63   | 1,72 | 21,3  | 0 |
| 695 | 1 | 0 | 0 | 0 | 0 | 2 | 1 | 2 | 1 | 0 | 56   | 1,57 | 22,72 | 0 |
| 696 | 1 | 0 | 1 | 0 | 0 |   | 0 | 4 | 0 | 3 | 52   | 1,59 | 20,57 | 0 |
| 697 | 1 | 0 | 0 | 0 | 0 | 3 | 1 | 5 | 4 | 0 | 65   | 1,67 | 23,31 | 0 |
| 698 | 2 | 1 | 0 | 0 | 0 | 1 | 0 | 1 | 0 | 0 | 52   | 1,71 | 17,78 | 0 |
| 699 | 2 | 1 | 0 | 0 | 0 | 1 | 0 | 1 | 0 | 0 | 52   | 1,71 | 17,78 | 0 |
| 700 | 2 | 0 | 0 | 0 | 0 | 1 | 1 | 2 | 1 | 0 | 55   | 1,66 | 19,96 | 0 |
| 701 | 2 | 0 | 0 | 0 | 0 | 1 | 1 | 2 | 1 | 0 | 55   | 1,66 | 19,96 | 0 |
| 702 | 2 | 0 | 0 | 0 | 0 | 1 | 0 | 1 | 0 | 0 | 64   | 1,57 | 25,96 | 0 |
| 703 | 1 | 1 | 0 | 0 | 0 | 1 | 0 | 1 | 0 | 0 | 63   | 1,64 | 23,42 | 0 |
| 704 | 1 | 0 | 0 | 0 | 0 | 1 | 0 | 1 | 0 | 0 | 73   | 1,76 | 23,57 | 0 |
| 705 | 1 | 0 | 0 | 0 | 1 | 1 | 1 | 2 | 1 | 0 | 92   | 1,76 | 29,70 | 0 |
| 706 | 1 | 1 | 0 | 0 | 0 | 1 | 0 | 1 | 0 | 0 | 89   | 1,65 | 32,69 | 0 |
| 707 | 1 | 0 | 0 | 0 | 0 | 3 | 1 | 4 | 3 | 0 | 100  | 1,59 | 39,56 | 0 |
| 708 | 1 | 0 | 0 | 0 | 1 | 5 | 1 | 2 | 1 | 0 | 62   | 1,67 | 22,23 | 0 |
| 709 | 1 | 0 | 1 | 0 | 0 | 1 | 0 | 1 | 0 | 0 | 63   | 1,64 | 23,42 | 0 |
| 710 | 1 | 0 | 0 | 0 | 0 | 1 | 1 | 2 | 1 | 0 | 52   | 1,73 | 17,37 | 0 |
| 711 | 1 | 1 | 1 | 0 | 0 | 1 | 0 | 1 | 0 | 0 | 60,5 | 1,67 | 21,69 | 0 |
| 712 | 1 | 0 | 0 | 0 | 0 | 1 | 0 | 1 | 0 | 0 | 56   | 1,63 | 21,08 | 0 |
| 713 | 1 | 0 | 1 | 0 | 0 | 3 | 1 | 3 | 2 | 0 | 57   | 1,63 | 21,45 | 0 |
| 714 | 1 | 0 | 0 | 0 | 0 | 1 | 1 | 2 | 1 | 0 | 56   | 1,7  | 19,38 | 0 |
| 715 | 1 | 0 | 0 | 0 | 0 | 1 | 1 | 2 | 1 | 0 | 62   | 1,67 | 22,23 | 0 |
| 716 | 1 | 0 | 0 | 0 | 0 | 2 | 0 | 1 | 0 | 0 | 64   | 1,62 | 24,39 | 0 |
| 717 | 1 | 0 | 0 | 0 | 0 | 5 | 1 | 4 | 3 | 0 | 71   | 1,61 | 27,39 | 0 |
| 718 | 1 | 0 | 0 | 0 | 0 | 5 | 1 | 4 | 3 | 0 | 71   | 1,61 | 27,39 | 0 |
| 719 | 1 | 0 | 0 | 0 | 0 | 3 | 0 | 1 | 0 | 0 | 47,5 | 1,53 | 20,29 | 0 |
| 720 | 1 | 0 | 0 | 0 | 1 | 1 | 1 | 2 | 1 | 0 | 82   | 1,76 | 26,47 | 0 |
| 721 | 1 | 0 | 0 | 0 | 0 | 3 | 0 | 1 | 0 | 0 | 62   | 1,62 | 23,62 | 0 |
| 722 | 1 | 0 | 0 | 0 | 0 | 2 | 0 | 1 | 0 | 0 | 60   | 1,68 | 21,26 | 0 |
| 723 | 1 | 0 | 0 | 0 | 0 | 1 | 1 | 4 | 1 | 2 | 75   | 1,65 | 27,55 | 0 |
| 724 | 1 | 1 | 0 | 0 | 0 | 1 | 1 | 2 | 1 | 0 | 73,5 | 1,68 | 26,04 | 0 |
| 725 | 1 | 1 | 0 | 0 | 0 | 6 | 1 | 2 | 1 | 0 | 61   | 1,58 | 24,44 | 0 |

|     |   |   |   |   |   |   |   |   |   |   |      |      |       |   |
|-----|---|---|---|---|---|---|---|---|---|---|------|------|-------|---|
| 726 | 1 | 0 | 0 | 0 | 0 | 2 | 0 | 1 | 0 | 0 | 48   | 1,55 | 19,98 | 0 |
| 727 | 1 | 0 | 0 | 0 | 0 | 1 | 0 | 1 | 0 | 0 | 63,8 | 1,75 | 20,83 | 0 |
| 728 | 1 | 0 | 0 | 0 | 0 | 1 | 0 | 1 | 0 | 0 | 53   | 1,65 | 19,47 | 0 |
| 729 | 1 | 0 | 0 | 0 | 0 | 1 | 0 | 1 | 0 | 0 | 69,5 | 1,68 | 24,62 | 0 |
| 730 | 1 | 0 | 0 | 0 | 0 | 1 | 1 | 2 | 1 | 0 | 69   | 1,69 | 24,16 | 0 |
| 731 | 1 | 0 | 0 | 0 | 0 | 2 | 1 | 2 | 1 | 0 | 78   | 1,7  | 26,99 | 0 |
| 732 | 1 | 0 | 0 | 0 | 0 | 1 | 1 | 4 | 2 | 1 | 62   | 1,61 | 23,92 | 0 |
| 733 | 2 | 0 | 0 | 0 | 0 | 1 | 1 | 2 | 1 | 0 | 56   | 1,57 | 22,72 | 0 |
| 734 | 2 | 0 | 0 | 0 | 0 | 1 | 1 | 2 | 1 | 0 | 56   | 1,57 | 22,72 | 0 |
| 735 | 2 | 0 | 0 | 0 | 1 | 1 | 1 | 3 | 2 | 0 | 71   | 1,58 | 28,44 | 0 |
| 736 | 2 | 0 | 0 | 0 | 1 | 1 | 1 | 3 | 2 | 0 | 71   | 1,58 | 28,44 | 0 |
| 737 | 1 | 0 | 0 | 0 | 0 | 1 | 0 | 1 | 0 | 0 | 50,5 | 1,63 | 19,01 | 0 |
| 738 | 2 | 0 | 0 | 0 | 0 | 1 | 1 | 2 | 1 | 0 | 53   | 1,67 | 19    | 0 |
| 739 | 2 | 0 | 0 | 0 | 0 | 1 | 0 | 1 | 0 | 0 | 57   | 1,61 | 21,99 | 0 |
| 740 | 2 | 0 | 0 | 0 | 0 | 1 | 0 | 1 | 0 | 0 | 57   | 1,61 | 21,99 | 0 |
| 741 | 1 | 0 | 0 | 0 | 1 | 1 | 0 | 1 | 0 | 0 | 51   | 1,66 | 18,51 | 0 |
| 742 | 1 | 0 | 0 | 0 | 1 | 1 | 0 | 1 | 0 | 0 | 75   | 1,68 | 26,57 | 0 |
| 743 | 1 | 0 | 0 | 0 | 1 | 1 | 0 | 1 | 0 | 0 | 75   | 1,68 | 26,57 | 0 |
| 744 | 1 | 0 | 0 | 0 | 0 | 1 | 0 | 1 | 0 | 0 | 81,5 | 1,79 | 25,44 | 0 |
| 745 | 2 | 1 | 0 | 0 | 0 | 1 | 0 | 1 | 0 | 0 | 102  | 1,67 | 36,57 | 0 |
| 746 | 1 | 0 | 0 | 0 | 0 | 1 | 1 | 2 | 1 | 0 | 66   | 1,57 | 26,78 | 0 |
| 747 | 1 | 0 | 0 | 0 | 0 | 1 | 1 | 4 | 2 | 1 | 75   | 1,63 | 28,23 | 0 |
| 748 | 1 | 0 | 0 | 0 | 0 | 1 | 1 | 4 | 2 | 1 | 75   | 1,63 | 28,23 | 0 |
| 749 | 1 | 0 | 0 | 0 | 0 | 2 | 0 | 1 | 0 | 0 | 54   | 1,58 | 21,63 | 0 |
| 750 | 1 | 0 | 0 | 0 | 0 | 2 | 0 | 1 | 0 | 0 | 54   | 1,58 | 21,63 | 0 |
| 751 | 1 | 0 | 0 | 0 | 0 | 1 | 1 | 6 | 3 | 2 | 58   | 1,6  | 22,66 | 1 |
| 752 | 1 | 0 | 0 | 0 | 0 | 6 | 1 | 2 | 1 | 0 | 52   | 1,6  | 20,31 | 0 |
| 753 | 1 | 0 | 1 | 0 | 0 | 2 | 1 | 2 | 1 | 0 | 71   | 1,6  | 27,73 | 0 |
| 754 | 1 | 0 | 0 | 0 | 0 | 1 | 1 | 5 | 1 | 3 | 71,5 | 1,83 | 21,35 | 0 |
| 755 | 1 | 1 | 0 | 0 | 1 | 1 | 0 | 1 | 0 | 0 | 88   | 1,65 | 32,32 | 0 |
| 756 | 1 | 0 | 0 | 0 | 0 | 6 | 1 | 4 | 2 | 1 | 60   | 1,65 | 22,04 | 0 |
| 757 | 1 | 0 | 0 | 0 | 0 | 6 | 1 | 4 | 2 | 1 | 60   | 1,65 | 22,04 | 0 |
| 758 | 1 | 0 | 0 | 0 | 0 | 1 | 1 | 2 | 1 | 0 | 65   | 1,68 | 23,03 | 0 |

|     |   |   |   |   |   |   |   |   |   |   |     |      |       |   |
|-----|---|---|---|---|---|---|---|---|---|---|-----|------|-------|---|
| 759 | 1 | 0 | 0 | 0 | 0 | 1 | 1 | 2 | 1 | 0 | 65  | 1,68 | 23,03 | 0 |
| 760 | 2 | 0 | 0 | 0 | 0 | 1 | 0 | 1 | 0 | 0 | 78  | 1,8  | 24,07 | 0 |
| 761 | 2 | 0 | 0 | 0 | 0 | 1 | 0 | 1 | 0 | 0 | 78  | 1,8  | 24,07 | 0 |
| 762 | 2 | 0 | 0 | 0 | 1 | 1 | 0 | 1 | 0 | 0 | 73  | 1,63 | 27,48 | 0 |
| 763 | 2 | 0 | 0 | 0 | 1 | 1 | 0 | 1 | 0 | 0 | 73  | 1,63 | 27,48 | 0 |
| 764 | 2 | 0 | 0 | 0 | 1 | 1 | 1 | 2 | 1 | 0 | 65  | 1,68 | 23,03 | 0 |
| 765 | 2 | 0 | 0 | 0 | 1 | 1 | 1 | 2 | 1 | 0 | 65  | 1,68 | 23,03 | 0 |
| 766 | 2 | 1 | 1 | 0 | 0 | 1 | 0 | 2 | 0 | 1 | 83  | 1,67 | 29,76 | 0 |
| 767 | 2 | 1 | 1 | 0 | 0 | 1 | 0 | 2 | 0 | 1 | 83  | 1,67 | 29,76 | 0 |
| 768 | 2 | 1 | 0 | 0 | 1 | 1 | 0 | 1 | 0 | 0 | 116 | 1,67 | 41,59 | 0 |
| 769 | 2 | 1 | 0 | 0 | 1 | 1 | 0 | 1 | 0 | 0 | 116 | 1,67 | 41,59 | 0 |
| 770 | 2 | 1 | 0 | 0 | 0 | 1 | 0 | 1 | 0 | 0 | 58  | 1,69 | 20,31 | 0 |
| 771 | 2 | 1 | 0 | 0 | 0 | 1 | 0 | 1 | 0 | 0 | 58  | 1,69 | 20,31 | 0 |
| 772 | 1 | 0 | 0 | 0 | 1 | 1 | 0 | 1 | 0 | 0 | 54  | 1,57 | 21,91 | 0 |
| 773 | 1 | 0 | 0 | 0 | 1 | 1 | 0 | 1 | 0 | 0 | 54  | 1,57 | 21,91 | 0 |
| 774 | 1 | 0 | 0 | 0 | 1 | 1 | 1 | 2 | 1 | 1 | 53  | 1,59 | 20,96 | 0 |
| 775 | 1 | 0 | 0 | 0 | 1 | 1 | 1 | 2 | 1 | 1 | 53  | 1,59 | 20,96 | 0 |
| 776 | 2 | 0 | 1 | 0 | 1 |   | 0 | 1 | 0 | 0 | 58  | 1,58 | 23,23 | 0 |
| 777 | 2 | 0 | 0 | 0 | 0 | 3 | 0 | 1 | 0 | 0 | 75  | 1,6  | 29,30 | 0 |
| 778 | 2 | 0 | 0 | 0 | 0 | 1 | 0 | 2 | 0 | 1 | 50  | 1,59 | 19,78 | 0 |
| 779 | 2 | 1 | 0 | 0 | 1 | 1 | 1 | 2 | 1 | 0 | 98  | 1,69 | 34,31 | 0 |
| 780 | 2 | 1 | 0 | 0 | 1 | 1 | 1 | 2 | 1 | 0 | 98  | 1,69 | 34,31 | 0 |
| 781 | 2 | 0 | 0 | 0 | 1 | 1 | 0 | 1 | 0 | 0 | 70  | 1,67 | 25,1  | 0 |
| 782 | 2 | 0 | 0 | 0 | 1 | 1 | 0 | 1 | 0 | 0 | 70  | 1,67 | 25,1  | 0 |
| 783 | 2 | 0 | 0 | 0 | 1 | 1 | 0 | 1 | 0 | 0 | 58  | 1,67 | 20,8  | 0 |
| 784 | 2 | 0 | 0 | 0 | 0 | 3 | 1 | 2 | 1 | 0 | 57  | 1,6  | 22,27 | 0 |
| 785 | 2 | 0 | 0 | 0 | 1 | 1 | 0 | 1 | 0 | 0 | 58  | 1,67 | 20,8  | 0 |
| 786 | 2 | 0 | 0 | 0 | 0 | 1 | 1 | 2 | 1 | 0 | 69  | 1,5  | 30,67 | 0 |
| 787 | 2 | 0 | 0 | 0 | 0 | 1 | 1 | 2 | 1 | 0 | 69  | 1,5  | 30,67 | 0 |
| 788 | 2 | 0 | 0 | 0 | 0 | 1 | 0 | 1 | 0 | 0 | 106 | 1,7  | 36,68 | 0 |
| 789 | 2 | 0 | 0 | 0 | 0 | 1 | 0 | 1 | 0 | 0 | 60  | 1,68 | 21,26 | 0 |
| 790 | 2 | 0 | 0 | 0 | 0 | 1 | 0 | 1 | 0 | 0 | 60  | 1,68 | 21,26 | 0 |
| 791 | 2 | 0 | 0 | 0 | 0 | 1 | 0 | 1 | 0 | 0 | 64  | 1,7  | 22,15 | 0 |



|     |   |   |   |   |   |   |   |   |   |   |      |      |       |   |
|-----|---|---|---|---|---|---|---|---|---|---|------|------|-------|---|
| 792 | 2 | 0 | 0 | 0 | 0 | 1 | 0 | 1 | 0 | 0 | 64   | 1,7  | 22,15 | 0 |
| 793 | 2 | 0 | 0 | 0 | 0 | 1 | 1 | 2 | 1 | 0 | 71,5 | 1,66 | 25,95 | 0 |
| 794 | 2 | 0 | 0 | 0 | 1 | 1 | 0 | 1 | 0 | 0 | 56   | 1,69 | 19,61 | 0 |
| 795 | 2 | 0 | 0 | 0 | 1 | 1 | 0 | 1 | 0 | 0 | 56   | 1,69 | 19,61 | 0 |
| 796 | 2 | 1 | 1 | 0 | 0 | 1 | 0 | 1 | 0 | 0 | 50   | 1,58 | 20,03 | 0 |
| 797 | 2 | 1 | 1 | 0 | 0 | 1 | 0 | 1 | 0 | 0 | 50   | 1,58 | 20,03 | 0 |
| 798 | 2 | 0 | 0 | 0 | 0 | 2 | 0 | 1 | 0 | 0 | 80   | 1,71 | 27,36 | 0 |
| 799 | 2 | 0 | 0 | 0 | 0 | 2 | 0 | 1 | 0 | 0 | 80   | 1,71 | 27,36 | 0 |
| 800 | 2 | 0 | 0 | 0 | 0 | 1 | 1 | 3 | 1 | 1 | 70   | 1,7  | 24,22 | 0 |
| 801 | 2 | 0 | 0 | 0 | 0 | 1 | 1 | 3 | 1 | 1 | 70   | 1,7  | 24,22 | 0 |
| 802 | 1 | 0 | 0 | 0 | 0 | 1 | 1 | 4 | 1 | 2 | 56   | 1,67 | 20,08 | 0 |
| 803 | 1 | 0 | 0 | 0 | 0 | 1 | 1 | 4 | 1 | 2 | 56   | 1,67 | 20,08 | 0 |
| 804 | 1 | 0 | 0 | 0 | 0 | 1 | 1 | 3 | 1 | 1 | 61   | 1,6  | 23,83 | 0 |
| 805 | 1 | 0 | 0 | 0 | 0 | 1 | 1 | 3 | 1 | 1 | 61   | 1,6  | 23,83 | 0 |
| 806 | 2 | 0 | 0 | 0 | 0 | 1 | 1 | 4 | 2 | 1 | 89   | 1,62 | 33,91 | 0 |
| 807 | 2 | 0 | 0 | 0 | 0 | 1 | 1 | 4 | 2 | 1 | 89   | 1,62 | 33,91 | 0 |
| 808 | 2 | 0 | 0 | 0 | 0 | 1 | 0 | 1 | 0 | 0 | 64   | 1,65 | 23,51 | 0 |
| 809 | 1 | 0 | 1 | 0 | 0 | 2 | 0 | 1 | 0 | 0 | 54   | 1,6  | 21,09 | 0 |
| 810 | 1 | 0 | 1 | 0 | 0 | 2 | 0 | 1 | 0 | 0 | 54   | 1,6  | 21,09 | 0 |
| 811 | 1 | 1 | 0 | 0 | 0 | 1 | 0 | 2 | 0 | 1 | 56   | 1,68 | 19,84 | 0 |
| 812 | 1 | 1 | 0 | 0 | 0 | 1 | 0 | 2 | 0 | 1 | 56   | 1,68 | 19,84 | 0 |
| 813 | 1 | 0 | 0 | 0 | 0 | 1 | 0 | 1 | 0 | 0 | 77   | 1,66 | 27,94 | 0 |
| 814 | 2 | 0 | 0 | 0 | 0 | 3 | 1 | 4 | 1 | 2 | 74   | 1,7  | 25,61 | 0 |
| 815 | 2 | 0 | 0 | 0 | 0 | 3 | 1 | 4 | 1 | 2 | 74   | 1,7  | 25,61 | 0 |
| 816 | 2 | 0 | 0 | 0 | 0 | 1 | 0 | 1 | 0 | 0 | 49   | 1,65 | 18    | 0 |
| 817 | 2 | 0 | 0 | 0 | 1 | 1 | 0 | 1 | 0 | 0 | 60   | 1,62 | 22,86 | 0 |
| 818 | 2 | 0 | 0 | 0 | 1 | 1 | 0 | 1 | 0 | 0 | 60   | 1,62 | 22,86 | 0 |
| 819 | 1 | 0 | 0 | 0 | 1 | 2 | 0 | 1 | 0 | 0 | 50   | 1,6  | 19,53 | 0 |
| 820 | 2 | 0 | 0 | 0 | 0 | 1 | 1 | 2 | 1 | 0 | 60   | 1,64 | 22,31 | 0 |
| 821 | 2 | 0 | 0 | 0 | 0 | 1 | 1 | 2 | 1 | 0 | 60   | 1,64 | 22,31 | 0 |
| 822 | 1 | 0 | 0 | 0 | 1 | 1 | 0 | 3 | 0 | 2 | 72   | 1,64 | 26,77 | 0 |
| 823 | 1 | 0 | 1 | 0 | 0 | 2 | 0 | 2 | 0 | 1 | 66   | 1,6  | 25,78 | 0 |
| 824 | 0 | 0 | 0 | 0 | 0 | 3 | 1 | 2 | 1 | 0 | 54   | 1,71 | 18,47 | 0 |

|     |   |   |   |   |   |   |   |   |   |   |      |      |       |   |
|-----|---|---|---|---|---|---|---|---|---|---|------|------|-------|---|
| 825 | 1 | 1 | 0 | 0 | 0 | 1 | 1 | 2 | 1 | 0 | 70   | 1,6  | 27,34 | 0 |
| 826 | 1 | 1 | 0 | 0 | 0 | 1 | 1 | 2 | 1 | 0 | 70   | 1,6  | 27,34 | 0 |
| 827 | 1 | 1 | 0 | 0 | 0 | 1 | 1 | 2 | 1 | 0 | 70   | 1,6  | 27,34 | 0 |
| 828 | 1 | 1 | 0 | 0 | 0 | 1 | 1 | 2 | 1 | 0 | 69,5 | 1,72 | 23,49 | 0 |
| 829 | 1 | 0 | 0 | 0 | 0 | 1 | 1 | 4 | 1 | 2 | 53   | 1,71 | 18,13 | 0 |
| 830 | 1 | 1 | 0 | 0 | 0 | 1 | 1 | 5 | 2 | 2 | 59   | 1,7  | 20,42 | 0 |
| 831 | 0 | 0 | 0 | 1 | 0 | 1 | 1 | 4 | 1 | 2 | 72   | 1,65 | 26,45 | 0 |
| 832 | 0 | 0 | 0 | 1 | 0 | 1 | 1 | 4 | 1 | 2 | 72   | 1,65 | 26,45 | 0 |
| 833 | 2 | 0 | 0 | 0 | 0 | 1 | 0 | 1 | 0 | 0 | 50   | 1,56 | 20,55 | 0 |
| 834 | 2 | 0 | 0 | 0 | 0 | 1 | 0 | 1 | 0 | 0 | 50   | 1,56 | 20,55 | 0 |
| 835 | 1 | 1 | 1 | 0 | 0 | 6 | 1 | 2 | 1 | 0 | 52   | 1,5  | 23,11 | 0 |
| 836 | 1 | 0 | 0 | 0 | 0 | 3 | 1 | 4 | 2 | 1 | 75   | 1,68 | 26,57 | 0 |
| 837 | 1 | 0 | 0 | 0 | 1 | 1 | 1 | 2 | 1 | 0 | 57   | 1,61 | 21,99 | 0 |
| 838 | 1 | 0 | 0 | 0 | 1 | 1 | 1 | 2 | 1 | 0 | 57   | 1,61 | 21,99 | 0 |
| 839 | 1 | 0 | 0 | 0 | 0 | 1 | 1 | 2 | 1 | 0 | 68   | 1,7  | 23,53 | 0 |
| 840 | 1 | 0 | 0 | 0 | 0 | 1 | 1 | 2 | 1 | 0 | 68   | 1,7  | 23,53 | 0 |
| 841 | 2 | 0 | 1 | 0 | 0 | 1 | 0 | 2 | 0 | 1 | 75   | 1,66 | 27,22 | 0 |
| 842 | 2 | 0 | 1 | 0 | 0 | 1 | 0 | 2 | 0 | 1 | 75   | 1,66 | 27,22 | 0 |
| 843 | 2 | 1 | 0 | 0 | 1 | 1 | 0 | 1 | 0 | 0 | 75   | 1,81 | 22,89 | 0 |
| 844 | 2 | 1 | 0 | 0 | 1 | 1 | 0 | 1 | 0 | 0 | 75   | 1,81 | 22,89 | 0 |
| 845 | 1 | 0 | 0 | 0 | 1 | 1 | 1 | 3 | 1 | 1 | 92   | 1,68 | 32,6  | 0 |
| 846 | 1 | 0 | 0 | 0 | 1 | 1 | 1 | 3 | 1 | 1 | 92   | 1,68 | 32,6  | 0 |
| 847 | 0 | 0 | 0 | 0 | 0 | 1 | 1 | 2 | 1 | 0 | 67   | 1,82 | 20,23 | 0 |
| 848 | 0 | 0 | 0 | 0 | 0 | 1 | 1 | 2 | 1 | 0 | 67   | 1,82 | 20,23 | 0 |
| 849 | 2 | 0 | 0 | 0 | 0 | 1 | 0 | 1 | 0 | 0 | 60   | 1,7  | 20,76 | 0 |
| 850 | 2 | 0 | 0 | 0 | 0 | 1 | 0 | 1 | 0 | 0 | 60   | 1,7  | 20,76 | 0 |
| 851 | 1 | 0 | 0 | 0 | 0 | 5 | 0 | 2 | 0 | 1 | 64   | 1,54 | 26,99 | 0 |
| 852 | 1 | 0 | 0 | 0 | 0 | 5 | 0 | 2 | 0 | 1 | 64   | 1,54 | 26,99 | 0 |
| 853 | 1 | 0 | 0 | 0 | 0 | 2 | 1 | 3 | 2 | 0 | 61   | 1,72 | 20,62 | 0 |
| 854 | 1 | 1 | 0 | 1 | 1 | 1 | 1 | 5 | 1 | 3 | 70   | 1,78 | 22,09 | 0 |
| 855 | 1 | 1 | 0 | 1 | 1 | 1 | 1 | 5 | 1 | 3 | 70   | 1,78 | 22,09 | 0 |
| 856 | 1 | 0 | 0 | 0 | 0 | 1 | 0 | 3 | 0 | 2 | 67   | 1,73 | 22,39 | 0 |
| 857 | 0 | 0 | 0 | 0 | 1 | 1 | 1 | 2 | 1 | 0 | 52   | 1,58 | 20,83 | 0 |

|     |   |   |   |   |   |   |   |   |   |   |      |      |       |   |
|-----|---|---|---|---|---|---|---|---|---|---|------|------|-------|---|
| 858 | 0 | 0 | 0 | 0 | 1 | 1 | 1 | 2 | 1 | 0 | 52   | 1,58 | 20,83 | 0 |
| 859 | 0 | 1 | 0 | 0 | 0 | 6 | 1 | 3 | 2 | 0 | 50   | 1,62 | 19,05 | 0 |
| 860 | 0 | 1 | 0 | 0 | 0 | 6 | 1 | 3 | 2 | 0 | 50   | 1,62 | 19,05 | 0 |
| 861 | 2 | 1 | 1 | 0 | 1 | 1 | 1 | 2 | 1 | 0 | 90   | 1,65 | 33,06 | 0 |
| 862 | 2 | 1 | 1 | 0 | 1 | 1 | 1 | 2 | 1 | 0 | 90   | 1,65 | 33,06 | 0 |
| 863 | 2 | 1 | 1 | 0 | 1 | 1 | 1 | 2 | 1 | 0 | 90   | 1,65 | 33,06 | 0 |
| 864 | 1 | 0 | 0 | 0 | 1 | 1 | 0 | 3 | 0 | 2 | 64   | 1,73 | 21,38 | 0 |
| 865 | 1 | 0 | 0 | 0 | 1 | 1 | 0 | 3 | 0 | 2 | 64   | 1,73 | 21,38 | 0 |
| 866 | 1 | 1 | 1 | 0 | 1 | 1 | 1 | 3 | 2 | 0 | 119  | 1,76 | 38,42 | 0 |
| 867 | 1 | 1 | 1 | 0 | 1 | 1 | 1 | 3 | 2 | 0 | 119  | 1,76 | 38,42 | 0 |
| 868 | 0 | 0 | 0 | 0 | 1 | 1 | 1 | 2 | 1 | 0 | 72   | 1,59 | 28,48 | 0 |
| 869 | 0 | 0 | 0 | 0 | 1 | 1 | 1 | 2 | 1 | 0 | 72   | 1,59 | 28,48 | 0 |
| 870 | 0 | 0 | 0 | 0 | 1 | 1 | 1 | 3 | 1 | 1 | 56   | 1,6  | 21,88 | 0 |
| 871 | 0 | 0 | 0 | 0 | 1 | 1 | 1 | 3 | 1 | 1 | 56   | 1,6  | 21,88 | 0 |
| 872 | 1 | 0 | 0 | 0 | 0 | 1 | 1 | 3 | 1 | 1 | 75   | 1,76 | 24,21 | 0 |
| 873 | 1 | 0 | 0 | 0 | 0 | 1 | 1 | 3 | 1 | 1 | 75   | 1,76 | 24,21 | 0 |
| 874 | 1 | 0 | 0 | 0 | 0 | 1 | 0 | 1 | 0 | 0 | 55   | 1,6  | 21,48 | 0 |
| 875 | 1 | 0 | 0 | 0 | 0 | 1 | 0 | 1 | 0 | 0 | 55   | 1,6  | 21,48 | 0 |
| 876 | 1 | 0 | 0 | 0 | 0 | 1 | 1 | 2 | 1 | 0 | 62   | 1,65 | 22,77 | 0 |
| 877 | 1 | 0 | 0 | 0 | 1 | 1 | 0 | 1 | 0 | 0 | 62   | 1,7  | 21,45 | 0 |
| 878 | 1 | 0 | 0 | 0 | 1 | 1 | 0 | 1 | 0 | 0 | 62   | 1,7  | 21,45 | 0 |
| 879 | 0 | 0 | 0 | 0 | 0 | 1 | 0 | 2 | 0 | 1 | 65   | 1,65 | 23,88 | 0 |
| 880 | 0 | 0 | 0 | 0 | 0 | 1 | 0 | 2 | 0 | 1 | 65   | 1,65 | 23,88 | 0 |
| 881 | 2 | 0 | 0 | 0 | 0 | 1 | 0 | 1 | 0 | 0 | 96   | 1,84 | 28,36 | 0 |
| 882 | 2 | 0 | 0 | 0 | 0 | 1 | 0 | 1 | 0 | 0 | 96   | 1,84 | 28,36 | 0 |
| 883 | 2 | 0 | 0 | 0 | 0 | 1 | 1 | 3 | 1 | 1 | 76   | 1,68 | 26,93 | 0 |
| 884 | 2 | 0 | 0 | 0 | 0 | 1 | 1 | 3 | 1 | 1 | 76   | 1,68 | 26,93 | 0 |
| 885 | 1 | 0 | 0 | 1 | 0 | 2 | 1 | 2 | 1 | 0 | 59   | 1,72 | 19,94 | 0 |
| 886 | 1 | 0 | 0 | 1 | 0 | 2 | 1 | 2 | 1 | 0 | 59   | 1,72 | 19,94 | 0 |
| 887 | 1 | 0 | 0 | 0 | 1 | 1 | 0 | 3 | 0 | 2 | 66,2 | 1,7  | 22,91 | 0 |
| 888 | 2 | 0 | 0 | 0 | 0 | 1 | 1 | 2 | 1 | 0 | 62   | 1,64 | 23,05 | 0 |
| 889 | 2 | 0 | 0 | 0 | 0 | 1 | 1 | 2 | 1 | 0 | 62   | 1,64 | 23,05 | 0 |
| 890 | 1 | 0 | 0 | 1 | 0 | 2 | 1 | 3 | 2 | 0 | 78   | 1,57 | 31,64 | 0 |

|     |   |   |   |   |   |   |   |   |   |   |     |      |       |   |
|-----|---|---|---|---|---|---|---|---|---|---|-----|------|-------|---|
| 891 | 1 | 0 | 0 | 0 | 0 | 3 | 0 | 2 | 0 | 1 | 109 | 1,73 | 36,42 | 0 |
| 892 | 1 | 0 | 0 | 0 | 0 | 3 | 0 | 2 | 0 | 1 | 109 | 1,73 | 36,42 | 0 |
| 893 | 1 | 0 | 0 | 0 | 0 | 2 | 0 | 2 | 0 | 1 | 56  | 1,65 | 20,57 | 0 |
| 894 | 1 | 0 | 0 | 1 | 0 | 1 | 0 | 3 | 0 | 2 | 106 | 1,78 | 33,46 | 0 |
| 895 | 1 | 0 | 0 | 1 | 0 | 1 | 0 | 3 | 0 | 2 | 106 | 1,78 | 33,46 | 0 |
| 896 | 1 | 1 | 1 | 0 | 1 | 1 | 1 | 4 | 2 | 1 | 96  | 1,65 | 35,26 | 0 |
| 897 | 1 | 0 | 0 | 0 | 1 | 1 | 1 | 2 | 1 | 0 | 62  | 1,7  | 21,45 | 0 |
| 898 | 1 | 0 | 0 | 0 | 1 | 1 | 1 | 2 | 1 | 0 | 62  | 1,7  | 21,45 | 0 |
| 899 | 1 | 0 | 0 | 0 | 1 | 1 | 0 | 1 | 0 | 0 | 50  | 1,61 | 19,29 | 0 |
| 900 | 1 | 0 | 0 | 0 | 1 | 1 | 0 | 1 | 0 | 0 | 50  | 1,61 | 19,29 | 0 |
| 901 | 2 | 0 | 0 | 0 | 0 |   | 1 | 2 | 1 | 0 | 55  | 1,66 | 19,96 | 0 |
| 902 | 2 | 0 | 0 | 0 | 1 | 1 | 0 | 1 | 0 | 0 | 59  | 1,63 | 22,21 | 0 |
| 903 | 2 | 0 | 0 | 0 | 1 | 1 | 0 | 1 | 0 | 0 | 59  | 1,63 | 22,21 | 0 |
| 904 | 2 | 0 | 1 | 0 | 0 | 1 | 1 | 4 | 1 | 2 | 70  | 1,76 | 22,60 | 0 |
| 905 | 2 | 0 | 0 | 0 | 1 | 1 | 0 | 1 | 0 | 0 | 68  | 1,8  | 20,99 | 0 |
| 906 | 2 | 0 | 0 | 0 | 1 | 1 | 0 | 1 | 0 | 0 | 68  | 1,8  | 20,99 | 0 |
| 907 | 1 | 0 | 0 | 0 | 0 | 1 | 1 | 2 | 1 | 0 | 60  | 1,67 | 21,51 | 0 |
| 908 | 1 | 0 | 0 | 0 | 0 | 1 | 1 | 2 | 1 | 0 | 60  | 1,67 | 21,51 | 0 |
| 909 | 1 | 1 | 0 | 0 | 0 | 2 | 1 | 4 | 1 | 2 | 107 | 1,64 | 39,78 | 0 |
| 910 | 0 | 0 | 1 | 0 | 1 | 1 | 0 | 1 | 0 | 0 | 87  | 1,58 | 34,85 | 0 |
| 911 | 1 | 1 | 0 | 0 | 0 | 1 | 0 | 1 | 0 | 0 | 62  | 1,64 | 23,05 | 0 |
| 912 | 2 | 0 | 0 | 0 | 0 |   | 1 | 2 | 1 | 0 | 54  | 1,68 | 19,13 | 0 |
| 913 | 0 | 0 | 0 | 0 | 0 | 1 | 0 | 1 | 0 | 0 | 64  | 1,78 | 20,2  | 0 |
| 914 | 0 | 0 | 0 | 0 | 0 | 1 | 0 | 1 | 0 | 0 | 64  | 1,78 | 20,2  | 0 |
| 915 | 1 | 0 | 0 | 0 | 0 | 1 | 1 | 5 | 1 | 3 | 85  | 1,66 | 30,85 | 0 |
| 916 | 1 | 0 | 0 | 0 | 0 | 1 | 1 | 5 | 1 | 3 | 85  | 1,66 | 30,85 | 0 |
| 917 | 1 | 0 | 1 | 0 | 0 | 2 | 1 | 3 | 1 | 1 | 56  | 1,6  | 21,88 | 0 |
| 918 | 0 | 1 | 0 | 1 | 0 | 1 | 1 | 2 | 1 | 0 | 73  | 1,68 | 25,86 | 0 |
| 919 | 0 | 1 | 0 | 1 | 0 | 1 | 1 | 2 | 1 | 0 | 73  | 1,68 | 25,86 | 0 |
| 920 | 2 | 0 | 0 | 0 | 0 | 1 | 1 | 2 | 1 | 0 | 59  | 1,76 | 19,05 | 0 |
| 921 | 2 | 0 | 0 | 0 | 0 | 3 | 1 | 4 | 1 | 2 | 66  | 1,64 | 24,54 | 0 |
| 922 | 1 | 0 | 0 | 0 | 0 | 4 | 1 | 5 | 2 | 2 | 53  | 1,49 | 23,87 | 0 |
| 923 | 1 | 0 | 0 | 0 | 0 | 4 | 1 | 5 | 2 | 2 | 53  | 1,49 | 23,87 | 0 |

|     |   |   |   |   |   |   |   |   |   |   |      |      |       |   |
|-----|---|---|---|---|---|---|---|---|---|---|------|------|-------|---|
| 924 | 1 | 1 | 0 | 0 | 0 | 2 | 0 | 1 | 0 | 0 | 90,4 | 1,7  | 31,28 | 0 |
| 925 | 2 | 1 | 0 | 0 | 0 | 3 | 1 | 2 | 1 | 0 | 74   | 1,58 | 29,64 | 0 |
| 926 | 2 | 1 | 0 | 0 | 0 | 3 | 1 | 2 | 1 | 0 | 74   | 1,58 | 29,64 | 0 |
| 927 | 0 | 0 | 0 | 0 | 1 | 1 | 1 | 2 | 1 | 0 | 56   | 1,68 | 19,84 | 0 |
| 928 | 0 | 0 | 0 | 0 | 1 | 1 | 1 | 2 | 1 | 0 | 56   | 1,68 | 19,84 | 0 |
| 929 | 0 | 0 | 0 | 0 | 0 | 1 | 1 | 2 | 1 | 0 | 58   | 1,7  | 20,07 | 0 |
| 930 | 0 | 0 | 0 | 0 | 0 | 1 | 1 | 2 | 1 | 0 | 58   | 1,7  | 20,07 | 0 |
| 931 | 1 | 0 | 0 | 0 | 0 |   | 1 | 2 | 1 | 0 | 64   | 1,67 | 22,95 | 0 |
| 932 | 0 | 0 | 0 | 0 | 1 | 1 | 0 | 1 | 0 | 0 | 73   | 1,82 | 22,04 | 0 |
| 933 | 0 | 0 | 0 | 0 | 1 | 1 | 0 | 1 | 0 | 0 | 73   | 1,82 | 22,04 | 0 |
| 934 | 1 | 0 | 0 | 0 | 1 | 1 | 1 | 2 | 1 | 0 | 69   | 1,64 | 25,65 | 0 |
| 935 | 1 | 0 | 0 | 0 | 1 | 1 | 1 | 2 | 1 | 0 | 69   | 1,64 | 25,65 | 0 |
| 936 | 2 | 0 | 0 | 0 | 1 | 1 | 0 | 1 | 0 | 0 | 106  | 1,69 | 37,11 | 0 |
| 937 | 2 | 0 | 0 | 0 | 1 | 1 | 0 | 1 | 0 | 0 | 106  | 1,69 | 37,11 | 0 |
| 938 | 2 | 0 | 1 | 0 | 1 | 3 | 0 | 1 | 0 | 0 | 73   | 1,5  | 32,44 | 0 |
| 939 | 2 | 0 | 1 | 0 | 1 | 3 | 0 | 1 | 0 | 0 | 73   | 1,5  | 32,44 | 0 |
| 940 | 0 | 0 | 0 | 0 | 0 | 1 | 0 | 1 | 0 | 0 | 88   | 1,69 | 30,81 | 0 |
| 941 | 0 | 0 | 0 | 0 | 0 | 1 | 0 | 1 | 0 | 0 | 88   | 1,69 | 30,81 | 0 |
| 942 | 0 | 1 | 0 | 0 | 0 | 2 | 0 | 1 | 0 | 0 | 77   | 1,81 | 23,5  | 0 |
| 943 | 0 | 1 | 0 | 0 | 0 | 2 | 0 | 1 | 0 | 0 | 77   | 1,81 | 23,5  | 0 |
| 944 | 1 | 1 | 0 | 0 | 0 | 3 | 1 | 2 | 1 | 0 | 68   | 1,7  | 23,53 | 0 |
| 945 | 0 | 0 | 0 | 0 | 1 | 1 | 0 | 1 | 0 | 0 | 58   | 1,68 | 20,55 | 0 |
| 946 | 0 | 0 | 0 | 0 | 1 | 1 | 0 | 1 | 0 | 0 | 58   | 1,68 | 20,55 | 0 |
| 947 | 1 | 0 | 0 | 0 | 0 | 3 | 0 | 1 | 0 | 0 | 75   | 1,57 | 30,43 | 0 |
| 948 | 1 | 0 | 0 | 0 | 1 | 1 | 1 | 2 | 1 | 0 | 100  | 1,58 | 40,06 | 0 |
| 949 | 1 | 0 | 0 | 0 | 1 | 1 | 1 | 2 | 1 | 0 | 100  | 1,58 | 40,06 | 0 |
| 950 | 1 | 1 | 0 | 0 | 0 | 6 | 0 | 1 | 0 | 0 | 81   | 1,68 | 28,7  | 0 |
| 951 | 1 | 1 | 0 | 0 | 0 | 6 | 0 | 1 | 0 | 0 | 81   | 1,68 | 28,7  | 0 |
| 952 | 0 | 0 | 0 | 0 | 0 | 3 | 0 | 1 | 0 | 0 | 61   | 1,65 | 22,41 | 0 |
| 953 | 0 | 0 | 0 | 0 | 0 | 3 | 0 | 2 | 0 | 1 | 66   | 1,68 | 23,38 | 0 |
| 954 | 0 | 0 | 1 | 0 | 0 | 2 | 0 | 1 | 0 | 0 | 58   | 1,72 | 19,61 | 0 |
| 955 | 0 | 0 | 1 | 0 | 0 | 2 | 0 | 1 | 0 | 0 | 58   | 1,72 | 19,61 | 0 |
| 956 | 2 | 0 | 0 | 0 | 1 | 1 | 0 | 1 | 0 | 0 | 83   | 1,61 | 32,02 | 0 |

|     |   |   |   |   |   |   |   |   |   |   |      |      |       |   |
|-----|---|---|---|---|---|---|---|---|---|---|------|------|-------|---|
| 957 | 2 | 0 | 0 | 0 | 1 | 1 | 0 | 1 | 0 | 0 | 83   | 1,61 | 32,02 | 0 |
| 958 | 0 | 0 | 0 | 0 | 0 | 3 | 1 | 2 | 1 | 0 | 65   | 1,65 | 23,88 | 0 |
| 959 | 0 | 0 | 0 | 0 | 0 | 6 | 0 | 1 | 0 | 0 | 63   | 1,72 | 21,3  | 0 |
| 960 | 0 | 0 | 0 | 0 | 0 | 6 | 0 | 1 | 0 | 0 | 63   | 1,72 | 21,3  | 0 |
| 961 | 1 | 0 | 1 | 0 | 1 | 1 | 0 | 2 | 0 | 1 | 91   | 1,63 | 34,25 | 0 |
| 962 | 1 | 0 | 1 | 0 | 1 | 1 | 0 | 2 | 0 | 1 | 91   | 1,63 | 34,25 | 0 |
| 963 | 0 | 0 | 0 | 0 | 1 | 1 | 0 | 1 | 0 | 0 | 62   | 1,75 | 20,24 | 0 |
| 964 | 0 | 0 | 0 | 0 | 1 | 1 | 0 | 1 | 0 | 0 | 62   | 1,75 | 20,24 | 0 |
| 965 | 1 | 0 | 1 | 1 | 0 | 3 | 0 | 4 | 0 | 3 | 71   | 1,59 | 28,08 | 0 |
| 966 | 1 | 0 | 1 | 1 | 0 | 3 | 0 | 4 | 0 | 3 | 71   | 1,59 | 28,08 | 0 |
| 967 | 1 | 0 | 1 | 1 | 0 | 3 | 0 | 4 | 0 | 3 | 71   | 1,59 | 28,08 | 0 |
| 968 | 0 | 0 | 0 | 1 | 1 | 1 | 0 | 2 | 0 | 1 | 58   | 1,68 | 20,55 | 0 |
| 969 | 0 | 0 | 0 | 1 | 1 | 1 | 0 | 2 | 0 | 1 | 58   | 1,68 | 20,55 | 0 |
| 970 | 1 | 0 | 0 | 0 | 0 | 1 | 1 | 3 | 1 | 1 | 80   | 1,73 | 26,73 | 0 |
| 971 | 1 | 0 | 0 | 0 | 0 | 1 | 1 | 3 | 1 | 1 | 80   | 1,73 | 26,73 | 0 |
| 972 | 2 | 0 | 0 | 0 | 1 | 3 | 0 | 1 | 0 | 0 | 77   | 1,57 | 31,24 | 0 |
| 973 | 1 | 0 | 0 | 0 | 0 | 1 | 1 | 3 | 1 | 1 | 63,5 | 1,75 | 20,73 | 0 |
| 974 | 0 | 0 | 0 | 0 | 1 | 1 | 0 | 1 | 0 | 0 | 64   | 1,58 | 25,64 | 0 |
| 975 | 0 | 0 | 0 | 0 | 1 | 1 | 0 | 1 | 0 | 0 | 64   | 1,58 | 25,64 | 0 |
| 976 | 2 | 0 | 0 | 0 | 1 | 1 | 1 | 3 | 1 | 1 | 97   | 1,71 | 33,17 | 0 |
| 977 | 2 | 0 | 0 | 0 | 1 | 1 | 1 | 3 | 1 | 1 | 97   | 1,71 | 33,17 | 0 |
| 978 | 1 | 0 | 0 | 0 | 0 | 1 | 1 | 2 | 1 | 0 | 60   | 1,68 | 21,26 | 0 |
| 979 | 2 | 0 | 0 | 0 | 0 | 2 | 1 | 2 | 1 | 0 | 54   | 1,6  | 21,09 | 0 |
| 980 | 1 | 0 | 0 | 0 | 0 |   | 0 | 1 | 0 | 0 | 55,6 | 1,6  | 21,72 | 0 |
| 981 | 0 | 0 | 0 | 1 | 1 | 3 | 1 | 3 | 2 | 0 | 69   | 1,7  | 23,88 | 1 |
| 982 | 0 | 0 | 0 | 1 | 1 | 3 | 1 | 3 | 2 | 0 | 69   | 1,7  | 23,88 | 1 |
| 983 | 0 | 1 | 0 | 0 | 0 | 1 | 1 | 2 | 1 | 0 | 60   | 1,68 | 21,26 | 0 |
| 984 | 0 | 1 | 0 | 0 | 0 | 1 | 1 | 2 | 1 | 0 | 60   | 1,68 | 21,26 | 0 |
| 985 | 0 | 0 | 0 | 0 | 0 | 1 | 1 | 2 | 1 | 0 | 78   | 1,6  | 30,47 | 0 |
| 986 | 0 | 0 | 0 | 0 | 0 | 1 | 1 | 2 | 1 | 0 | 78   | 1,6  | 30,47 | 0 |
| 987 | 1 | 1 | 0 | 0 | 1 | 1 | 0 | 1 | 0 | 0 | 49   | 1,68 | 17,36 | 0 |
| 988 | 1 | 1 | 0 | 0 | 1 | 1 | 0 | 1 | 0 | 0 | 49   | 1,68 | 17,36 | 0 |
| 989 | 1 | 1 | 0 | 0 | 0 | 3 | 1 | 2 | 1 | 0 | 64   | 1,56 | 26,3  | 0 |

|      |   |   |   |   |   |   |   |   |   |   |      |      |       |   |
|------|---|---|---|---|---|---|---|---|---|---|------|------|-------|---|
| 990  | 1 | 1 | 0 | 0 | 0 | 3 | 1 | 2 | 1 | 0 | 64   | 1,56 | 26,3  | 0 |
| 991  | 2 | 0 | 0 | 0 | 0 | 1 | 0 | 1 | 0 | 0 | 73   | 1,69 | 25,56 | 0 |
| 992  | 2 | 0 | 0 | 0 | 0 | 1 | 0 | 1 | 0 | 0 | 73   | 1,69 | 25,56 | 0 |
| 993  | 1 | 0 | 0 | 0 | 0 | 3 | 1 | 3 | 2 | 0 | 75   | 1,58 | 30,04 | 0 |
| 994  | 0 | 1 | 0 | 0 | 1 | 1 | 1 | 2 | 1 | 0 | 86   | 1,72 | 29,07 | 0 |
| 995  | 0 | 1 | 0 | 0 | 1 | 1 | 1 | 2 | 1 | 0 | 86   | 1,72 | 29,07 | 0 |
| 996  | 0 | 1 | 0 | 0 | 1 | 1 | 1 | 2 | 1 | 0 | 86   | 1,72 | 29,07 | 0 |
| 997  | 0 | 1 | 0 | 0 | 0 | 1 | 1 | 2 | 1 | 0 | 81   | 1,65 | 29,75 | 0 |
| 998  | 0 | 1 | 0 | 0 | 0 | 1 | 1 | 2 | 1 | 0 | 81   | 1,65 | 29,75 | 0 |
| 999  | 2 | 1 | 0 | 1 | 0 | 1 | 1 | 2 | 1 | 0 | 65,5 | 1,7  | 22,66 | 0 |
| 1000 | 1 | 0 | 0 | 1 | 0 | 1 | 0 | 2 | 0 | 1 | 56,3 | 1,68 | 19,95 | 0 |
| 1001 | 2 | 0 | 0 | 0 | 0 | 1 | 0 | 2 | 0 | 1 | 60   | 1,84 | 17,72 | 0 |
| 1002 | 1 | 0 | 0 | 0 | 0 | 2 | 1 | 2 | 1 | 0 | 100  | 1,68 | 35,43 | 0 |
| 1003 | 2 | 1 | 1 | 0 | 1 | 1 | 0 | 1 | 0 | 0 | 132  | 1,66 | 47,9  | 0 |
| 1004 | 2 | 1 | 1 | 0 | 1 | 1 | 0 | 1 | 0 | 0 | 132  | 1,66 | 47,9  | 0 |
| 1005 | 2 | 1 | 1 | 0 | 1 | 1 | 0 | 1 | 0 | 0 | 132  | 1,66 | 47,9  | 0 |
| 1006 | 1 | 0 | 0 | 0 | 1 | 1 | 1 | 4 | 2 | 1 | 81   | 1,84 | 23,92 | 0 |
| 1007 | 1 | 0 | 0 | 0 | 1 | 1 | 1 | 4 | 2 | 1 | 81   | 1,84 | 23,92 | 0 |
| 1008 | 1 | 0 | 0 | 0 | 1 | 1 | 1 | 4 | 2 | 1 | 81   | 1,84 | 23,92 | 0 |
| 1009 | 1 | 0 | 0 | 0 | 0 | 1 | 1 | 2 | 1 | 0 | 82   | 1,6  | 32,03 | 0 |
| 1010 | 1 | 0 | 0 | 0 | 0 | 1 | 1 | 2 | 1 | 0 | 82   | 1,6  | 32,03 | 0 |
| 1011 | 1 | 0 | 0 | 0 | 0 | 1 | 1 | 3 | 2 | 1 | 85   | 1,75 | 27,76 | 0 |
| 1012 | 1 | 0 | 0 | 0 | 0 | 1 | 1 | 3 | 2 | 1 | 85   | 1,75 | 27,76 | 0 |
| 1013 | 2 | 0 | 0 | 0 | 0 | 1 | 1 | 3 | 1 | 1 | 68   | 1,62 | 25,91 | 0 |
| 1014 | 2 | 0 | 0 | 0 | 0 | 1 | 1 | 3 | 1 | 1 | 68   | 1,62 | 25,91 | 0 |
| 1015 | 0 | 0 | 0 | 0 | 0 | 3 | 1 | 3 | 1 | 1 | 72   | 1,65 | 26,45 | 1 |
| 1016 | 0 | 1 | 1 | 0 | 0 | 1 | 0 | 1 | 0 | 0 | 48   | 1,54 | 20,24 | 0 |
| 1017 | 0 | 1 | 1 | 0 | 0 | 1 | 0 | 1 | 0 | 0 | 48   | 1,54 | 20,24 | 0 |
| 1018 | 0 | 0 | 0 | 0 | 0 | 1 | 1 | 2 | 1 | 0 | 53   | 1,63 | 19,95 | 0 |
| 1019 | 1 | 0 | 0 | 0 | 0 | 1 | 1 | 2 | 1 | 0 | 58   | 1,63 | 21,83 | 0 |
| 1020 | 1 | 0 | 0 | 0 | 0 | 1 | 1 | 2 | 1 | 0 | 58   | 1,63 | 21,83 | 0 |
| 1021 | 0 | 0 | 0 | 0 | 0 | 2 | 0 | 1 | 0 | 0 | 60   | 1,7  | 20,76 | 0 |
| 1022 | 2 | 0 | 0 | 0 | 1 | 1 | 1 | 2 | 1 | 0 | 70   | 1,81 | 21,37 | 0 |

|      |   |   |   |   |   |   |   |   |   |   |      |      |       |   |
|------|---|---|---|---|---|---|---|---|---|---|------|------|-------|---|
| 1023 | 2 | 0 | 0 | 0 | 1 | 1 | 1 | 2 | 1 | 0 | 70   | 1,81 | 21,37 | 0 |
| 1024 | 1 | 0 | 1 | 0 | 0 | 1 | 1 | 2 | 1 | 0 | 108  | 1,69 | 37,81 | 0 |
| 1025 | 1 | 1 | 1 | 0 | 0 | 2 | 0 | 1 | 0 | 0 | 61,5 | 1,65 | 22,59 | 0 |
| 1026 | 0 | 0 | 1 | 0 | 1 | 1 | 0 | 1 | 0 | 0 | 60   | 1,63 | 22,58 | 0 |
| 1027 | 0 | 0 | 1 | 0 | 0 | 2 | 1 | 3 | 2 | 0 | 53   | 1,6  | 20,7  | 0 |
| 1028 | 0 | 0 | 1 | 0 | 0 | 2 | 1 | 3 | 2 | 0 | 53   | 1,6  | 20,7  | 0 |
| 1029 | 0 | 0 | 1 | 0 | 0 | 3 | 1 | 4 | 1 | 2 | 56   | 1,67 | 20,08 | 0 |
| 1030 | 0 | 0 | 1 | 0 | 0 | 3 | 1 | 4 | 1 | 2 | 56   | 1,67 | 20,08 | 0 |
| 1031 | 0 | 0 | 1 | 0 | 0 | 1 | 1 | 2 | 1 | 0 | 83   | 1,56 | 34,11 | 0 |
| 1032 | 0 | 0 | 1 | 0 | 0 | 1 | 1 | 2 | 1 | 0 | 83   | 1,56 | 34,11 | 0 |
| 1033 | 0 | 0 | 1 | 0 | 0 | 1 | 1 | 2 | 1 | 0 | 83   | 1,56 | 34,11 | 0 |
| 1034 | 0 | 0 | 1 | 0 | 0 | 1 | 1 | 2 | 1 | 0 | 85   | 1,75 | 27,76 | 0 |
| 1035 | 0 | 0 | 1 | 0 | 0 | 1 | 1 | 2 | 1 | 0 | 85   | 1,75 | 27,76 | 0 |
| 1036 | 0 | 0 | 1 | 0 | 1 | 1 | 0 | 1 | 0 | 0 | 98   | 1,64 | 36,44 | 0 |
| 1037 | 0 | 0 | 1 | 0 | 0 | 1 | 1 | 2 | 1 | 0 | 79   | 1,79 | 24,66 | 0 |
| 1038 | 1 | 0 | 1 | 0 | 0 | 1 | 0 | 1 | 0 | 0 | 74,5 | 1,6  | 29,10 | 0 |
| 1039 | 1 | 0 | 1 | 0 | 1 | 1 | 0 | 2 | 0 | 1 | 76   | 1,75 | 24,82 | 0 |
| 1040 | 1 | 0 | 1 | 0 | 1 | 1 | 0 | 2 | 0 | 1 | 76   | 1,75 | 24,82 | 0 |
| 1041 | 1 | 0 | 1 | 0 | 0 | 1 | 0 | 1 | 0 | 0 | 59   | 1,74 | 19,49 | 0 |
| 1042 | 1 | 0 | 1 | 0 | 0 | 1 | 0 | 1 | 0 | 0 | 59   | 1,74 | 19,49 | 0 |
| 1043 | 1 | 0 | 1 | 0 | 0 | 1 | 1 | 2 | 1 | 0 | 71   | 1,64 | 26,4  | 0 |
| 1044 | 1 | 0 | 1 | 0 | 0 | 1 | 1 | 2 | 1 | 0 | 71   | 1,64 | 26,4  | 0 |
| 1045 | 1 | 0 | 1 | 0 | 0 | 2 | 1 | 2 | 1 | 0 | 87   | 1,7  | 30,1  | 0 |
| 1046 | 1 | 0 | 1 | 0 | 0 | 2 | 1 | 2 | 1 | 0 | 87   | 1,7  | 30,1  | 0 |
| 1047 | 1 | 0 | 1 | 0 | 0 | 2 | 1 | 2 | 1 | 0 | 87   | 1,7  | 30,1  | 0 |
| 1048 | 1 | 0 | 1 | 0 | 0 | 2 | 1 | 3 | 2 | 0 | 68   | 1,62 | 25,91 | 0 |
| 1049 | 1 | 0 | 1 | 0 | 0 | 2 | 1 | 3 | 1 | 1 | 56   | 1,55 | 23,31 | 0 |
| 1050 | 1 | 0 | 1 | 0 | 0 | 2 | 1 | 3 | 1 | 1 | 56   | 1,55 | 23,31 | 0 |
| 1051 | 2 | 0 | 1 | 0 | 0 | 1 | 0 | 1 | 0 | 0 | 77   | 1,6  | 30,08 | 0 |
| 1052 | 1 | 0 | 1 | 0 | 0 | 1 | 1 | 3 | 1 | 1 | 45   | 1,55 | 18,73 | 0 |
| 1053 | 1 | 0 | 1 | 0 | 0 | 1 | 1 | 3 | 1 | 1 | 45   | 1,55 | 18,73 | 0 |
| 1054 | 1 | 0 | 1 | 0 | 0 | 2 | 0 | 4 | 0 | 3 | 57   | 1,58 | 22,83 | 0 |
| 1055 | 1 | 0 | 1 | 0 | 0 | 2 | 0 | 4 | 0 | 3 | 57   | 1,58 | 22,83 | 0 |



|      |   |   |   |   |   |   |   |   |   |   |     |      |       |   |
|------|---|---|---|---|---|---|---|---|---|---|-----|------|-------|---|
| 1056 | 2 | 0 | 1 | 0 | 1 | 1 | 0 | 1 | 0 | 0 | 57  | 1,62 | 21,72 | 0 |
| 1057 | 2 | 0 | 1 | 0 | 1 | 1 | 0 | 1 | 0 | 0 | 71  | 1,76 | 22,92 | 0 |
| 1058 | 2 | 0 | 1 | 0 | 1 | 1 | 0 | 1 | 0 | 0 | 71  | 1,76 | 22,92 | 0 |
| 1059 | 2 | 1 | 1 | 0 | 0 | 1 | 1 | 3 | 2 | 0 | 65  | 1,6  | 25,39 | 0 |
| 1060 | 2 | 1 | 1 | 0 | 0 | 1 | 1 | 3 | 2 | 0 | 65  | 1,6  | 25,39 | 0 |
| 1061 | 2 | 1 | 1 | 0 | 0 | 1 | 1 | 3 | 2 | 0 | 65  | 1,6  | 25,39 | 0 |
| 1062 | 1 | 0 | 1 | 1 | 0 | 1 | 1 | 4 | 1 | 2 | 80  | 1,65 | 29,38 | 0 |
| 1063 | 1 | 0 | 1 | 1 | 0 | 1 | 1 | 4 | 1 | 2 | 80  | 1,65 | 29,38 | 0 |
| 1064 | 1 | 0 | 1 | 0 | 0 | 1 | 1 | 2 | 1 | 0 | 108 | 1,69 | 37,81 | 0 |
| 1065 | 2 | 0 | 1 | 0 | 1 | 2 | 1 | 3 | 1 | 1 | 71  | 1,55 | 29,55 | 1 |
| 1066 | 2 | 0 | 1 | 0 | 1 | 2 | 1 | 3 | 1 | 1 | 71  | 1,55 | 29,55 | 1 |
| 1067 | 2 | 0 | 1 | 0 | 1 | 2 | 1 | 3 | 1 | 1 | 71  | 1,55 | 29,55 | 1 |
| 1068 | 2 | 1 | 1 | 0 | 1 | 1 | 1 | 3 | 1 | 1 | 77  | 1,5  | 34,22 | 0 |
| 1069 | 2 | 1 | 1 | 0 | 1 | 1 | 1 | 3 | 1 | 1 | 77  | 1,5  | 34,22 | 0 |
| 1070 | 2 | 1 | 1 | 0 | 1 | 1 | 1 | 3 | 1 | 1 | 77  | 1,5  | 34,22 | 0 |
| 1071 | 0 | 0 | 1 | 0 | 0 | 3 | 1 | 4 | 3 | 0 | 72  | 1,57 | 29,21 | 0 |
| 1072 | 0 | 0 | 1 | 0 | 0 | 3 | 1 | 4 | 3 | 0 | 72  | 1,57 | 29,21 | 0 |
| 1073 | 0 | 0 | 1 | 0 | 0 | 4 | 1 | 2 | 1 | 0 | 66  | 1,6  | 25,78 | 0 |
| 1074 | 1 | 0 | 1 | 0 | 0 | 1 | 1 | 2 | 1 | 0 | 58  | 1,6  | 22,66 | 0 |
| 1075 | 2 | 0 | 1 | 0 | 0 | 1 | 1 | 5 | 3 | 1 | 70  | 1,78 | 22,09 | 0 |
| 1076 | 2 | 0 | 1 | 0 | 0 | 1 | 1 | 5 | 3 | 1 | 70  | 1,78 | 22,09 | 0 |
| 1077 | 2 | 0 | 1 | 0 | 0 | 3 | 1 | 2 | 1 | 0 | 51  | 1,5  | 22,67 | 0 |
| 1078 | 1 | 1 | 1 | 0 | 0 | 1 | 1 | 3 | 1 | 1 | 59  | 1,67 | 21,16 | 0 |
| 1079 | 2 | 1 | 1 | 1 | 1 | 1 | 1 | 2 | 1 | 0 | 111 | 1,78 | 35,03 | 0 |
| 1080 | 2 | 1 | 1 | 1 | 1 | 1 | 1 | 2 | 1 | 0 | 111 | 1,78 | 35,03 | 0 |
| 1081 | 1 | 0 | 0 | 0 | 1 | 1 | 0 | 1 | 0 | 0 | 88  | 1,74 | 29,07 | 0 |
| 1082 | 1 | 0 | 0 | 1 | 0 | 1 | 0 | 2 | 0 | 1 | 64  | 1,69 | 22,41 | 0 |
| 1083 | 1 | 0 | 0 | 1 | 0 | 1 | 0 | 2 | 0 | 1 | 64  | 1,69 | 22,41 | 0 |
| 1084 | 1 | 0 | 0 | 0 | 0 | 5 | 1 | 4 | 3 | 0 | 74  | 1,63 | 27,85 | 0 |
| 1085 | 1 | 0 | 0 | 0 | 0 | 5 | 1 | 4 | 3 | 0 | 74  | 1,63 | 27,85 | 0 |
| 1086 | 1 | 1 | 0 | 0 | 1 | 1 | 0 | 2 | 0 | 1 | 92  | 1,5  | 40,89 | 0 |
| 1087 | 1 | 1 | 0 | 0 | 1 | 1 | 0 | 2 | 0 | 1 | 92  | 1,5  | 40,89 | 0 |
| 1088 | 0 | 0 | 0 | 0 | 0 | 4 | 0 | 1 | 0 | 0 | 45  | 1,6  | 17,58 | 0 |

|      |   |   |   |   |   |   |   |   |   |   |      |      |       |   |
|------|---|---|---|---|---|---|---|---|---|---|------|------|-------|---|
| 1089 | 1 | 0 | 0 | 0 | 0 | 1 | 1 | 4 | 3 | 0 | 96,5 | 1,65 | 35,45 | 0 |
| 1090 | 2 | 0 | 0 | 0 | 1 | 3 | 1 | 2 | 1 | 0 | 54   | 1,6  | 21,09 | 0 |
| 1091 | 2 | 0 | 0 | 0 | 1 | 3 | 1 | 2 | 1 | 0 | 54   | 1,6  | 21,09 | 0 |
| 1092 | 2 | 0 | 0 | 0 | 0 | 1 | 0 | 1 | 0 | 0 | 91   | 1,64 | 33,83 | 0 |
| 1093 | 0 | 0 | 0 | 0 | 0 | 2 | 0 | 1 | 0 | 0 | 43   | 1,54 | 18,13 | 0 |
| 1094 | 2 | 0 | 1 | 1 | 0 | 3 | 1 | 4 | 1 | 2 | 53,5 | 1,64 | 19,89 | 1 |
| 1095 | 1 | 0 | 0 | 0 | 0 | 2 | 1 | 3 | 1 | 1 | 64   | 1,78 | 20,2  | 0 |
| 1096 | 1 | 0 | 0 | 0 | 0 | 2 | 1 | 3 | 1 | 1 | 64   | 1,78 | 20,2  | 0 |
| 1097 | 1 | 0 | 0 | 0 | 1 | 1 | 0 | 3 | 0 | 2 | 78   | 1,69 | 27,31 | 0 |
| 1098 | 1 | 0 | 0 | 0 | 1 | 1 | 0 | 3 | 0 | 2 | 78   | 1,69 | 27,31 | 0 |
| 1099 | 2 | 0 | 0 | 0 | 1 | 1 | 0 | 1 | 0 | 0 | 72   | 1,68 | 25,51 | 0 |
| 1100 | 2 | 0 | 0 | 0 | 1 | 1 | 0 | 1 | 0 | 0 | 72   | 1,68 | 25,51 | 0 |
| 1101 | 2 | 0 | 0 | 0 | 1 | 1 | 0 | 1 | 0 | 0 | 72   | 1,68 | 25,51 | 0 |
| 1102 | 1 | 0 | 0 | 0 | 0 | 2 | 1 | 6 | 1 | 4 | 67,5 | 1,68 | 23,92 | 1 |
| 1103 | 1 | 1 | 0 | 0 | 0 | 1 | 1 | 5 | 1 | 3 | 75   | 1,7  | 25,95 | 0 |
| 1104 | 1 | 1 | 0 | 0 | 0 | 1 | 1 | 5 | 1 | 3 | 75   | 1,7  | 25,95 | 0 |
| 1105 | 1 | 1 | 0 | 0 | 0 | 1 | 1 | 5 | 1 | 3 | 75   | 1,7  | 25,95 | 0 |
| 1106 | 0 | 0 | 0 | 0 | 0 | 6 | 0 | 1 | 0 | 0 | 62   | 1,62 | 23,62 | 0 |
| 1107 | 0 | 0 | 0 | 0 | 0 | 6 | 0 | 1 | 0 | 0 | 62   | 1,62 | 23,62 | 0 |
| 1108 | 1 | 1 | 1 | 0 | 0 | 6 | 0 | 2 | 0 | 1 | 78   | 1,55 | 32,47 | 0 |
| 1109 | 1 | 1 | 1 | 0 | 0 | 6 | 0 | 2 | 0 | 1 | 78   | 1,55 | 32,47 | 0 |
| 1110 | 1 | 0 | 0 | 0 | 1 | 1 | 0 | 2 | 0 | 1 | 65   | 1,74 | 21,47 | 0 |
| 1111 | 1 | 0 | 0 | 0 | 1 | 1 | 0 | 2 | 0 | 1 | 65   | 1,74 | 21,47 | 0 |
| 1112 | 1 | 0 | 0 | 0 | 1 | 1 | 0 | 2 | 0 | 1 | 65   | 1,74 | 21,47 | 0 |
| 1113 | 0 | 1 | 0 | 1 | 0 | 1 | 1 | 2 | 1 | 0 | 49   | 1,68 | 17,36 | 0 |
| 1114 | 1 | 0 | 0 | 0 | 0 | 1 | 0 | 1 | 0 | 0 | 68   | 1,74 | 22,46 | 0 |
| 1115 | 1 | 0 | 0 | 0 | 0 | 1 | 0 | 1 | 0 | 0 | 68   | 1,74 | 22,46 | 0 |
| 1116 | 2 | 0 | 0 | 0 | 1 | 2 | 0 | 1 | 0 | 0 | 65   | 1,71 | 22,23 | 0 |
| 1117 | 1 | 1 | 0 | 0 | 0 | 1 | 1 | 3 | 1 | 1 | 89   | 1,68 | 31,53 | 0 |
| 1118 | 1 | 1 | 0 | 0 | 0 | 1 | 1 | 3 | 1 | 1 | 89   | 1,68 | 31,53 | 0 |
| 1119 | 1 | 1 | 0 | 0 | 0 | 1 | 1 | 3 | 1 | 1 | 89   | 1,68 | 31,53 | 0 |
| 1120 | 0 | 0 | 0 | 1 | 1 | 1 | 0 | 1 | 0 | 0 | 52   | 1,65 | 19,10 | 0 |
| 1121 | 0 | 0 | 0 | 0 | 0 |   | 1 | 6 | 3 | 2 | 52   | 1,62 | 19,81 | 0 |

|      |   |   |   |   |   |   |   |   |   |   |      |      |       |   |
|------|---|---|---|---|---|---|---|---|---|---|------|------|-------|---|
| 1122 | 0 | 0 | 0 | 0 | 0 |   | 1 | 6 | 3 | 2 | 52   | 1,62 | 19,81 | 0 |
| 1123 | 1 | 0 | 0 | 0 | 0 | 1 | 1 | 5 | 2 | 2 | 92   | 1,8  | 28,4  | 0 |
| 1124 | 1 | 0 | 0 | 0 | 0 | 1 | 1 | 5 | 2 | 2 | 92   | 1,8  | 28,4  | 0 |
| 1125 | 1 | 0 | 0 | 0 | 0 | 2 | 0 | 2 | 0 | 1 | 47   | 1,58 | 18,83 | 0 |
| 1126 | 1 | 0 | 0 | 0 | 0 | 2 | 0 | 2 | 0 | 1 | 47   | 1,58 | 18,83 | 0 |
| 1127 | 0 | 0 | 0 | 0 | 0 | 1 | 0 | 1 | 0 | 0 | 67   | 1,64 | 24,91 | 0 |
| 1128 | 0 | 0 | 0 | 0 | 0 | 1 | 1 | 2 | 1 | 0 | 92   | 1,7  | 31,83 | 0 |
| 1129 | 0 | 0 | 0 | 0 | 0 | 1 | 0 | 2 | 0 | 1 | 59   | 1,64 | 21,94 | 0 |
| 1130 | 0 | 0 | 0 | 0 | 0 | 1 | 1 | 2 | 1 | 0 | 92   | 1,7  | 31,83 | 0 |
| 1131 | 0 | 0 | 0 | 0 | 0 | 3 | 0 | 1 | 0 | 0 | 64   | 1,6  | 25    | 0 |
| 1132 | 0 | 0 | 0 | 0 | 1 | 3 | 1 | 2 | 1 | 0 | 50   | 1,63 | 18,82 | 0 |
| 1133 | 0 | 0 | 0 | 0 | 1 | 3 | 1 | 2 | 1 | 0 | 50   | 1,63 | 18,82 | 0 |
| 1134 | 0 | 0 | 0 | 0 | 0 | 3 | 0 | 1 | 0 | 0 | 64   | 1,6  | 25    | 0 |
| 1135 | 0 | 0 | 0 | 0 | 0 | 2 | 1 | 2 | 1 | 0 | 69   | 1,58 | 27,64 | 0 |
| 1136 | 0 | 0 | 0 | 0 | 0 | 2 | 1 | 2 | 1 | 0 | 69   | 1,58 | 27,64 | 0 |
| 1137 | 0 | 0 | 0 | 0 | 0 | 2 | 1 | 2 | 1 | 0 | 69   | 1,58 | 27,64 | 0 |
| 1138 | 0 | 0 | 0 | 0 | 0 | 3 | 1 | 2 | 1 | 0 | 62   | 1,6  | 24,22 | 0 |
| 1139 | 0 | 0 | 0 | 0 | 0 | 3 | 1 | 2 | 1 | 0 | 62   | 1,6  | 24,22 | 0 |
| 1140 | 0 | 0 | 0 | 0 | 0 | 1 | 0 | 1 | 0 | 0 | 57,5 | 1,73 | 19,21 | 0 |
| 1141 | 0 | 0 | 0 | 0 | 0 | 1 | 0 | 1 | 0 | 0 | 65   | 1,64 | 24,17 | 0 |
| 1142 | 0 | 0 | 0 | 0 | 1 | 1 | 1 | 2 | 1 | 0 | 66   | 1,7  | 22,84 | 0 |
| 1143 | 0 | 0 | 0 | 0 | 0 | 3 | 1 | 2 | 1 | 0 | 59   | 1,69 | 20,66 | 0 |
| 1144 | 0 | 0 | 0 | 0 | 0 | 1 | 1 | 2 | 1 | 0 | 54   | 1,67 | 19,36 | 0 |
| 1145 | 0 | 0 | 0 | 0 | 1 | 1 | 1 | 2 | 1 | 0 | 66   | 1,7  | 22,84 | 0 |
| 1146 | 0 | 0 | 0 | 0 | 0 | 1 | 0 | 3 | 0 | 2 | 72   | 1,73 | 24,06 | 0 |
| 1147 | 0 | 0 | 0 | 0 | 0 | 1 | 1 | 2 | 1 | 0 | 54   | 1,67 | 19,36 | 0 |
| 1148 | 0 | 0 | 0 | 0 | 0 | 1 | 0 | 3 | 0 | 2 | 72   | 1,73 | 24,06 | 0 |
| 1149 | 0 | 0 | 0 | 0 | 0 | 1 | 0 | 2 | 0 | 1 | 61   | 1,72 | 20,62 | 0 |
| 1150 | 0 | 0 | 0 | 0 | 0 | 1 | 0 | 2 | 0 | 1 | 61   | 1,72 | 20,62 | 0 |
| 1151 | 0 | 0 | 0 | 0 | 0 | 1 | 0 | 2 | 0 | 1 | 56   | 1,69 | 19,61 | 0 |
| 1152 | 0 | 0 | 0 | 0 | 0 | 1 | 0 | 2 | 0 | 1 | 56   | 1,69 | 19,61 | 0 |
| 1153 | 0 | 0 | 1 | 0 | 1 | 1 | 1 | 2 | 1 | 0 | 57   | 1,6  | 22,27 | 0 |
| 1154 | 0 | 0 | 0 | 0 | 0 | 3 | 0 | 1 | 0 | 0 | 50   | 1,7  | 17,30 | 0 |

|      |   |   |   |   |   |   |   |   |   |   |      |      |       |   |
|------|---|---|---|---|---|---|---|---|---|---|------|------|-------|---|
| 1155 | 0 | 0 | 1 | 0 | 0 | 2 | 0 | 2 | 0 | 1 | 61   | 1,75 | 19,92 | 0 |
| 1156 | 0 | 0 | 0 | 0 | 0 | 3 | 1 | 4 | 2 | 1 | 69   | 1,67 | 24,74 | 0 |
| 1157 | 0 | 0 | 1 | 0 | 0 | 2 | 0 | 2 | 0 | 1 | 61   | 1,75 | 19,92 | 0 |
| 1158 | 0 | 0 | 0 | 0 | 0 | 3 | 1 | 4 | 2 | 1 | 69   | 1,67 | 24,74 | 0 |
| 1159 | 0 | 0 | 0 | 0 | 0 | 1 | 0 | 1 | 0 | 0 | 68   | 1,7  | 23,53 | 0 |
| 1160 | 0 | 0 | 0 | 0 | 0 | 1 | 0 | 1 | 0 | 0 | 68   | 1,7  | 23,53 | 0 |
| 1161 | 0 | 0 | 0 | 0 | 0 | 3 | 0 | 1 | 0 | 0 | 58   | 1,66 | 21,05 | 0 |
| 1162 | 0 | 0 | 0 | 0 | 0 | 1 | 1 | 2 | 1 | 0 | 65   | 1,63 | 24,46 | 0 |
| 1163 | 0 | 0 | 0 | 0 | 0 | 1 | 1 | 2 | 1 | 0 | 65   | 1,63 | 24,46 | 0 |
| 1164 | 0 | 0 | 0 | 0 | 0 | 1 | 0 | 2 | 0 | 1 | 63,5 | 1,63 | 23,90 | 0 |
| 1165 | 0 | 0 | 0 | 0 | 1 | 1 | 1 | 2 | 1 | 0 | 62   | 1,58 | 24,84 | 0 |
| 1166 | 0 | 0 | 0 | 0 | 0 |   | 0 | 1 | 0 | 0 | 79   | 1,64 | 29,37 | 0 |
| 1167 | 0 | 0 | 0 | 0 | 0 | 3 | 1 | 2 | 1 | 0 | 52   | 1,61 | 20,06 | 0 |
| 1168 | 0 | 0 | 0 | 0 | 0 | 1 | 0 | 1 | 0 | 0 | 69   | 1,71 | 23,60 | 0 |
| 1169 | 0 | 0 | 0 | 0 | 0 | 1 | 1 | 2 | 1 | 0 | 62   | 1,73 | 20,72 | 0 |
| 1170 | 0 | 0 | 0 | 0 | 0 | 1 | 1 | 2 | 1 | 0 | 62   | 1,73 | 20,72 | 0 |
| 1171 | 0 | 0 | 0 | 0 | 0 | 1 | 0 | 1 | 0 | 0 | 63   | 1,7  | 21,8  | 0 |
| 1172 | 0 | 0 | 1 | 0 | 1 | 3 | 0 | 2 | 0 | 1 | 63   | 1,6  | 24,61 | 0 |
| 1173 | 0 | 0 | 0 | 0 | 0 | 1 | 0 | 1 | 0 | 0 | 63   | 1,7  | 21,8  | 0 |
| 1174 | 0 | 0 | 1 | 0 | 1 | 3 | 0 | 2 | 0 | 1 | 63   | 1,6  | 24,61 | 0 |
| 1175 | 0 | 0 | 0 | 0 | 0 | 1 | 1 | 2 | 1 | 0 | 78   | 1,61 | 30,09 | 0 |
| 1176 | 0 | 0 | 0 | 0 | 0 | 2 | 1 | 3 | 2 | 0 | 82   | 1,65 | 30,12 | 0 |
| 1177 | 0 | 0 | 0 | 0 | 0 | 2 | 0 | 1 | 0 | 0 | 60   | 1,6  | 23,44 | 0 |
| 1178 | 0 | 0 | 0 | 0 | 0 | 2 | 0 | 1 | 0 | 0 | 60   | 1,6  | 23,44 | 0 |
| 1179 | 0 | 0 | 0 | 0 | 0 | 1 | 1 | 2 | 1 | 0 | 78   | 1,61 | 30,09 | 0 |
| 1180 | 0 | 0 | 0 | 0 | 0 | 1 | 0 | 1 | 0 | 0 | 60   | 1,68 | 21,26 | 0 |
| 1181 | 0 | 0 | 0 | 0 | 0 | 1 | 0 | 1 | 0 | 0 | 69   | 1,73 | 23,05 | 0 |
| 1182 | 0 | 0 | 0 | 0 | 0 | 1 | 0 | 1 | 0 | 0 | 69   | 1,73 | 23,05 | 0 |
| 1183 | 0 | 0 | 0 | 0 | 0 | 3 | 1 | 2 | 1 | 0 | 57   | 1,67 | 20,44 | 0 |
| 1184 | 0 | 0 | 0 | 0 | 0 | 1 | 1 | 2 | 1 | 0 | 68   | 1,73 | 22,72 | 0 |
| 1185 | 0 | 0 | 0 | 0 | 0 | 1 | 0 | 1 | 0 | 0 | 62   | 1,67 | 22,23 | 0 |
| 1186 | 0 | 0 | 0 | 0 | 0 | 3 | 1 | 2 | 1 | 0 | 57   | 1,67 | 20,44 | 0 |
| 1187 | 0 | 0 | 0 | 0 | 0 | 1 | 0 | 1 | 0 | 0 | 88   | 1,68 | 31,18 | 0 |

|      |   |   |   |   |   |   |   |   |   |   |      |      |       |   |
|------|---|---|---|---|---|---|---|---|---|---|------|------|-------|---|
| 1188 | 0 | 0 | 0 | 0 | 0 | 1 | 1 | 2 | 1 | 0 | 68   | 1,73 | 22,72 | 0 |
| 1189 | 0 | 0 | 0 | 0 | 0 | 1 | 1 | 3 | 1 | 1 | 50   | 1,62 | 19,05 | 0 |
| 1190 | 0 | 0 | 0 | 0 | 0 | 1 | 0 | 1 | 0 | 0 | 88   | 1,68 | 31,18 | 0 |
| 1191 | 0 | 0 | 0 | 0 | 0 | 1 | 0 | 1 | 0 | 0 | 62   | 1,67 | 22,23 | 0 |
| 1192 | 0 | 0 | 0 | 0 | 0 | 1 | 1 | 2 | 1 | 0 | 91   | 1,78 | 28,72 | 0 |
| 1193 | 0 | 0 | 0 | 0 | 0 | 1 | 1 | 2 | 1 | 0 | 72   | 1,75 | 23,51 | 0 |
| 1194 | 0 | 0 | 0 | 0 | 0 | 1 | 1 | 2 | 1 | 0 | 91   | 1,78 | 28,72 | 0 |
| 1195 | 0 | 0 | 0 | 0 | 0 | 1 | 1 | 2 | 1 | 0 | 72   | 1,75 | 23,51 | 0 |
| 1196 | 0 | 0 | 0 | 0 | 0 | 1 | 1 | 2 | 1 | 0 | 91   | 1,78 | 28,72 | 0 |
| 1197 | 0 | 0 | 0 | 0 | 0 | 2 | 1 | 3 | 1 | 1 | 59,5 | 1,73 | 19,88 | 0 |
| 1198 | 0 | 0 | 0 | 1 | 0 | 1 | 0 | 1 | 0 | 0 | 64   | 1,61 | 24,69 | 0 |
| 1199 | 0 | 0 | 0 | 1 | 0 | 1 | 0 | 1 | 0 | 0 | 64   | 1,61 | 24,69 | 0 |
| 1200 | 0 | 0 | 1 | 0 | 0 | 1 | 0 | 1 | 0 | 0 | 64   | 1,63 | 24,09 | 0 |
| 1201 | 0 | 1 | 0 | 0 | 0 | 2 | 1 | 2 | 1 | 0 | 85   | 1,68 | 30,12 | 1 |
| 1202 | 0 | 0 | 0 | 0 | 0 | 1 | 1 | 2 | 1 | 0 | 86   | 1,73 | 28,73 | 0 |
| 1203 | 0 | 0 | 0 | 0 | 1 | 1 | 0 | 1 | 0 | 0 | 69   | 1,6  | 26,95 | 0 |
| 1204 | 0 | 0 | 0 | 0 | 1 | 1 | 0 | 1 | 0 | 0 | 69   | 1,6  | 26,95 | 0 |
| 1205 | 0 | 0 | 0 | 0 | 1 | 1 | 0 | 1 | 0 | 0 | 69   | 1,6  | 26,95 | 0 |
| 1206 | 0 | 0 | 0 | 0 | 0 | 1 | 1 | 3 | 2 | 0 | 66   | 1,68 | 23,38 | 0 |
| 1207 | 0 | 0 | 0 | 0 | 0 | 1 | 1 | 3 | 2 | 0 | 66   | 1,68 | 23,38 | 0 |
| 1208 | 0 | 0 | 0 | 0 | 0 | 1 | 0 | 1 | 0 | 0 | 59   | 1,6  | 23,05 | 0 |
| 1209 | 0 | 0 | 0 | 0 | 0 | 4 | 0 | 1 | 0 | 0 | 45   | 1,55 | 18,73 | 0 |
| 1210 | 0 | 0 | 0 | 0 | 0 | 2 | 0 | 1 | 0 | 0 | 72   | 1,75 | 23,51 | 0 |
| 1211 | 0 | 0 | 0 | 0 | 0 | 4 | 0 | 1 | 0 | 0 | 45   | 1,55 | 18,73 | 0 |
| 1212 | 0 | 1 | 0 | 0 | 0 | 1 | 1 | 3 | 2 | 0 | 69   | 1,65 | 25,34 | 0 |
| 1213 | 0 | 0 | 0 | 0 | 0 | 1 | 0 | 1 | 0 | 0 | 75   | 1,6  | 29,3  | 0 |
| 1214 | 0 | 0 | 0 | 0 | 0 | 6 | 1 | 3 | 1 | 1 | 69   | 1,63 | 25,97 | 0 |
| 1215 | 0 | 0 | 0 | 0 | 0 | 2 | 1 | 3 | 1 | 1 | 71   | 1,76 | 22,92 | 0 |
| 1216 | 0 | 0 | 0 | 0 | 0 | 1 | 0 | 1 | 0 | 0 | 75   | 1,6  | 29,3  | 0 |
| 1217 | 0 | 0 | 0 | 0 | 0 | 1 | 1 | 2 | 1 | 0 | 52   | 1,7  | 17,99 | 0 |
| 1218 | 0 | 0 | 0 | 0 | 0 | 2 | 1 | 3 | 1 | 1 | 71   | 1,76 | 22,92 | 0 |
| 1219 | 0 | 1 | 0 | 0 | 1 | 1 | 0 | 1 | 0 | 0 | 81   | 1,73 | 27,06 | 0 |
| 1220 | 0 | 0 | 0 | 0 | 0 | 6 | 1 | 3 | 1 | 1 | 69   | 1,63 | 25,97 | 0 |

|      |   |   |   |   |   |   |   |   |   |   |      |      |       |   |
|------|---|---|---|---|---|---|---|---|---|---|------|------|-------|---|
| 1221 | 0 | 0 | 0 | 0 | 0 | 1 | 0 | 1 | 0 | 0 | 98   | 1,76 | 31,64 | 0 |
| 1222 | 0 | 0 | 0 | 0 | 1 | 1 | 0 | 1 | 0 | 0 | 84,8 | 1,78 | 26,76 | 0 |
| 1223 | 0 | 0 | 0 | 0 | 0 | 1 | 0 | 1 | 0 | 0 | 98   | 1,76 | 31,64 | 0 |
| 1224 | 0 | 1 | 0 | 0 | 0 | 1 | 1 | 3 | 2 | 0 | 84   | 1,69 | 29,41 | 0 |
| 1225 | 0 | 0 | 0 | 0 | 0 | 1 | 1 | 2 | 1 | 0 | 72   | 1,68 | 25,51 | 0 |
| 1226 | 0 | 1 | 0 | 0 | 0 | 1 | 1 | 3 | 2 | 0 | 84   | 1,69 | 29,41 | 0 |
| 1227 | 0 | 0 | 0 | 0 | 0 | 6 | 0 | 1 | 0 | 0 | 62   | 1,6  | 24,22 | 0 |
| 1228 | 0 | 0 | 0 | 0 | 0 | 1 | 1 | 2 | 1 | 0 | 73   | 1,72 | 24,68 | 0 |
| 1229 | 0 | 0 | 0 | 0 | 0 | 1 | 1 | 2 | 1 | 0 | 73   | 1,72 | 24,68 | 0 |
| 1230 | 1 | 1 | 1 | 0 | 0 | 3 | 1 | 3 | 2 | 0 | 49   | 1,57 | 19,88 | 0 |
| 1231 | 1 | 1 | 0 | 0 | 1 | 1 | 1 | 2 | 1 | 0 | 77   | 1,6  | 30,08 | 0 |
| 1232 | 1 | 1 | 0 | 0 | 1 | 1 | 1 | 2 | 1 | 0 | 77   | 1,6  | 30,08 | 0 |
| 1233 | 1 | 1 | 0 | 0 | 0 | 2 | 1 | 2 | 1 | 0 | 69   | 1,7  | 23,88 | 0 |
| 1234 | 2 | 0 | 0 | 0 | 0 | 1 | 1 | 2 | 1 | 0 | 48,5 | 1,59 | 19,18 | 0 |
| 1235 | 1 | 0 | 0 | 0 | 1 | 3 | 1 | 3 | 2 | 0 | 88   | 1,65 | 32,32 | 0 |
| 1236 | 1 | 0 | 0 | 0 | 1 | 3 | 1 | 3 | 2 | 0 | 88   | 1,65 | 32,32 | 0 |
| 1237 | 1 | 0 | 0 | 0 | 0 | 1 | 0 | 2 | 0 | 1 | 68   | 1,77 | 21,71 | 0 |
| 1238 | 1 | 0 | 0 | 0 | 0 | 1 | 0 | 2 | 0 | 1 | 68   | 1,77 | 21,71 | 0 |
| 1239 | 1 | 0 | 0 | 0 | 1 | 1 | 1 | 3 | 1 | 1 | 70   | 1,6  | 27,34 | 0 |
| 1240 | 1 | 0 | 0 | 0 | 1 | 1 | 1 | 3 | 1 | 1 | 70   | 1,6  | 27,34 | 0 |
| 1241 | 1 | 0 | 0 | 0 | 0 |   | 1 | 5 | 2 | 2 | 53   | 1,63 | 19,95 | 0 |
| 1242 | 1 | 0 | 0 | 0 | 0 | 1 | 1 | 5 | 3 | 1 | 62   | 1,68 | 21,97 | 0 |
| 1243 | 1 | 0 | 0 | 0 | 0 | 1 | 1 | 5 | 3 | 1 | 62   | 1,68 | 21,97 | 0 |
| 1244 | 1 | 0 | 0 | 0 | 0 | 1 | 0 | 3 | 0 | 2 | 59   | 1,7  | 20,42 | 0 |
| 1245 | 1 | 0 | 0 | 0 | 0 | 2 | 0 | 2 | 0 | 1 | 58   | 1,71 | 19,84 | 0 |
| 1246 | 1 | 0 | 0 | 0 | 0 | 2 | 1 | 7 | 4 | 2 | 59   | 1,7  | 20,42 | 0 |
| 1247 | 1 | 0 | 0 | 0 | 0 | 2 | 1 | 7 | 4 | 2 | 59   | 1,7  | 20,42 | 0 |
| 1248 | 1 | 0 | 0 | 0 | 0 | 2 | 0 | 4 | 0 | 3 | 77   | 1,7  | 26,64 | 0 |
| 1249 | 1 | 0 | 0 | 0 | 0 | 3 | 1 | 4 | 1 | 2 | 62   | 1,65 | 22,77 | 0 |
| 1250 | 2 | 0 | 0 | 0 | 1 | 1 | 0 | 3 | 0 | 2 | 47   | 1,65 | 17,26 | 0 |
| 1251 | 2 | 0 | 0 | 0 | 1 | 1 | 0 | 3 | 0 | 2 | 47   | 1,65 | 17,26 | 0 |
| 1252 | 2 | 0 | 0 | 0 | 0 | 3 | 0 | 1 | 0 | 0 | 67   | 1,72 | 22,65 | 0 |
| 1253 | 2 | 0 | 0 | 0 | 0 | 3 | 0 | 1 | 0 | 0 | 67   | 1,72 | 22,65 | 0 |

|      |   |   |   |   |   |   |   |   |   |   |      |      |       |   |
|------|---|---|---|---|---|---|---|---|---|---|------|------|-------|---|
| 1254 | 1 | 0 | 0 | 0 | 1 | 1 | 1 | 2 | 1 | 0 | 70   | 1,76 | 22,6  | 0 |
| 1255 | 1 | 0 | 0 | 0 | 1 | 1 | 1 | 2 | 1 | 0 | 70   | 1,76 | 22,6  | 0 |
| 1256 | 1 | 0 | 0 | 0 | 0 | 3 | 0 | 1 | 0 | 0 | 51,5 | 1,59 | 20,37 | 0 |
| 1257 | 2 | 0 | 1 | 0 | 0 | 1 | 1 | 3 | 2 | 0 | 85   | 1,61 | 32,79 | 0 |
| 1258 | 2 | 0 | 1 | 0 | 0 | 1 | 1 | 3 | 2 | 0 | 85   | 1,61 | 32,79 | 0 |
| 1259 | 1 | 0 | 0 | 0 | 0 | 1 | 0 | 2 | 0 | 1 | 60,5 | 1,7  | 20,93 | 0 |
| 1260 | 1 | 0 | 0 | 0 | 1 | 3 | 1 | 3 | 1 | 1 | 65   | 1,58 | 26,04 | 0 |
| 1261 | 1 | 0 | 0 | 0 | 1 | 3 | 1 | 3 | 1 | 1 | 65   | 1,58 | 26,04 | 0 |
| 1262 | 1 | 0 | 0 | 0 | 0 | 3 | 0 | 1 | 0 | 0 | 75   | 1,68 | 26,57 | 0 |
| 1263 | 1 | 0 | 1 | 0 | 0 | 1 | 0 | 2 | 0 | 1 | 79,9 | 1,7  | 27,65 | 0 |
| 1264 | 1 | 0 | 0 | 0 | 0 | 6 | 1 | 2 | 1 | 0 | 151  | 1,7  | 52,25 | 0 |
| 1265 | 1 | 0 | 0 | 0 | 0 | 6 | 1 | 2 | 1 | 0 | 151  | 1,7  | 52,25 | 0 |
| 1266 | 2 | 0 | 0 | 0 | 0 | 2 | 1 | 2 | 1 | 0 | 86   | 1,7  | 29,76 | 0 |
| 1267 | 2 | 0 | 0 | 0 | 0 | 1 | 0 | 1 | 0 | 0 | 74   | 1,7  | 25,61 | 0 |
| 1268 | 2 | 0 | 0 | 0 | 0 | 1 | 0 | 1 | 0 | 0 | 74   | 1,7  | 25,61 | 0 |
| 1269 | 1 | 0 | 0 | 0 | 0 | 1 | 1 | 3 | 2 | 0 | 68,5 | 1,8  | 21,14 | 0 |
| 1270 | 1 | 0 | 0 | 0 | 0 | 1 | 1 | 2 | 1 | 0 | 48   | 1,57 | 19,47 | 0 |
| 1271 | 1 | 0 | 0 | 0 | 0 | 1 | 1 | 3 | 1 | 1 | 97   | 1,6  | 37,89 | 0 |
| 1272 | 1 | 0 | 0 | 0 | 0 | 1 | 0 | 1 | 0 | 0 | 67   | 1,82 | 20,23 | 0 |
| 1273 | 1 | 0 | 0 | 0 | 0 | 1 | 0 | 1 | 0 | 0 | 67   | 1,82 | 20,23 | 0 |
| 1274 | 2 | 0 | 0 | 0 | 0 | 1 | 1 | 2 | 1 | 0 | 57   | 1,63 | 21,45 | 0 |
| 1275 | 2 | 0 | 0 | 0 | 0 | 1 | 1 | 2 | 1 | 0 | 57   | 1,63 | 21,45 | 0 |
| 1276 | 2 | 1 | 0 | 0 | 0 | 1 | 0 | 1 | 0 | 0 | 77   | 1,65 | 28,28 | 0 |
| 1277 | 1 | 0 | 0 | 0 | 0 | 1 | 0 | 1 | 0 | 0 | 50   | 1,57 | 20,28 | 0 |
| 1278 | 1 | 0 | 0 | 0 | 0 | 1 | 0 | 1 | 0 | 0 | 50   | 1,57 | 20,28 | 0 |
| 1279 | 2 | 0 | 0 | 0 | 0 | 1 | 1 | 3 | 1 | 1 | 68   | 1,79 | 21,22 | 0 |
| 1280 | 2 | 0 | 0 | 0 | 0 | 1 | 1 | 3 | 1 | 1 | 68   | 1,79 | 21,22 | 0 |
| 1281 | 2 | 0 | 0 | 0 | 0 | 1 | 1 | 3 | 1 | 1 | 68   | 1,79 | 21,22 | 0 |
| 1282 | 2 | 0 | 0 | 0 | 0 | 1 | 1 | 2 | 1 | 0 | 56   | 1,69 | 19,61 | 0 |
| 1283 | 2 | 0 | 0 | 0 | 0 | 1 | 1 | 2 | 1 | 0 | 56   | 1,69 | 19,61 | 0 |
| 1284 | 1 | 0 | 0 | 0 | 0 | 3 | 1 | 2 | 1 | 0 | 59   | 1,68 | 20,90 | 0 |
| 1285 | 2 | 0 | 0 | 0 | 1 | 1 | 0 | 1 | 0 | 0 | 62   | 1,68 | 21,97 | 0 |
| 1286 | 2 | 0 | 0 | 0 | 1 | 1 | 0 | 1 | 0 | 0 | 62   | 1,68 | 21,97 | 0 |

|      |   |   |   |   |   |   |   |   |   |   |     |      |       |   |
|------|---|---|---|---|---|---|---|---|---|---|-----|------|-------|---|
| 1287 | 1 | 0 | 0 | 0 | 0 | 1 | 1 | 2 | 1 | 0 | 74  | 1,73 | 24,73 | 0 |
| 1288 | 1 | 0 | 0 | 0 | 0 | 1 | 1 | 2 | 1 | 0 | 74  | 1,73 | 24,73 | 0 |
| 1289 | 1 | 0 | 0 | 0 | 0 | 1 | 0 | 2 | 0 | 1 | 56  | 1,77 | 17,87 | 0 |
| 1290 | 1 | 0 | 0 | 0 | 0 | 1 | 0 | 2 | 0 | 1 | 56  | 1,77 | 17,87 | 0 |
| 1291 | 1 | 0 | 0 | 0 | 0 | 1 | 0 | 1 | 0 | 0 | 53  | 1,68 | 18,78 | 0 |
| 1292 | 1 | 0 | 0 | 0 | 0 | 1 | 0 | 1 | 0 | 0 | 53  | 1,68 | 18,78 | 0 |
| 1293 | 1 | 0 | 0 | 0 | 0 | 1 | 0 | 1 | 0 | 0 | 53  | 1,68 | 18,78 | 0 |
| 1294 | 1 | 0 | 0 | 0 | 0 | 1 | 1 | 3 | 1 | 1 | 60  | 1,66 | 21,77 | 0 |
| 1295 | 1 | 0 | 0 | 0 | 0 | 1 | 1 | 3 | 1 | 1 | 60  | 1,66 | 21,77 | 0 |
| 1296 | 1 | 0 | 0 | 0 | 1 | 1 | 1 | 3 | 1 | 1 | 92  | 1,66 | 33,39 | 0 |
| 1297 | 1 | 1 | 0 | 0 | 0 | 3 | 0 | 1 | 0 | 0 | 65  | 1,63 | 24,46 | 0 |
| 1298 | 1 | 0 | 0 | 0 | 0 | 1 | 1 | 3 | 1 | 1 | 63  | 1,58 | 25,24 | 0 |
| 1299 | 1 | 0 | 0 | 0 | 0 | 1 | 1 | 3 | 1 | 1 | 63  | 1,58 | 25,24 | 0 |
| 1300 | 2 | 0 | 0 | 0 | 1 | 1 | 0 | 1 | 0 | 0 | 80  | 1,68 | 28,34 | 0 |
| 1301 | 2 | 0 | 0 | 0 | 0 | 1 | 0 | 1 | 0 | 0 | 50  | 1,65 | 18,37 | 0 |
| 1302 | 2 | 0 | 1 | 0 | 1 | 1 | 1 | 2 | 1 | 0 | 85  | 1,72 | 28,73 | 0 |
| 1303 | 2 | 0 | 1 | 0 | 1 | 1 | 1 | 2 | 1 | 0 | 85  | 1,72 | 28,73 | 0 |
| 1304 | 2 | 0 | 0 | 0 | 0 | 1 | 0 | 1 | 0 | 0 | 50  | 1,67 | 17,93 | 0 |
| 1305 | 2 | 0 | 0 | 0 | 0 | 1 | 0 | 1 | 0 | 0 | 50  | 1,67 | 17,93 | 0 |
| 1306 | 2 | 0 | 0 | 0 | 0 | 1 | 0 | 1 | 0 | 0 | 61  | 1,69 | 21,36 | 0 |
| 1307 | 2 | 0 | 0 | 0 | 0 | 1 | 0 | 1 | 0 | 0 | 61  | 1,69 | 21,36 | 0 |
| 1308 | 2 | 0 | 0 | 0 | 0 | 1 | 0 | 1 | 0 | 0 | 61  | 1,69 | 21,36 | 0 |
| 1309 | 2 | 0 | 0 | 0 | 0 | 1 | 0 | 1 | 0 | 0 | 87  | 1,82 | 26,26 | 0 |
| 1310 | 2 | 0 | 0 | 0 | 0 | 1 | 0 | 1 | 0 | 0 | 87  | 1,82 | 26,26 | 0 |
| 1311 | 2 | 0 | 0 | 0 | 1 | 1 | 0 | 1 | 0 | 0 | 65  | 1,69 | 22,76 | 0 |
| 1312 | 2 | 0 | 0 | 0 | 0 | 1 | 0 | 2 | 0 | 1 | 72  | 1,68 | 25,51 | 0 |
| 1313 | 2 | 0 | 0 | 0 | 0 | 1 | 0 | 2 | 0 | 1 | 72  | 1,68 | 25,51 | 0 |
| 1314 | 1 | 1 | 1 | 0 | 1 | 1 | 1 | 4 | 1 | 2 | 107 | 1,65 | 39,3  | 0 |
| 1315 | 1 | 1 | 1 | 0 | 1 | 1 | 1 | 4 | 1 | 2 | 107 | 1,65 | 39,3  | 0 |
| 1316 | 2 | 0 | 0 | 0 | 0 | 1 | 0 | 3 | 0 | 2 | 73  | 1,72 | 24,68 | 0 |
| 1317 | 2 | 0 | 0 | 0 | 0 | 1 | 0 | 3 | 0 | 2 | 73  | 1,72 | 24,68 | 0 |
| 1318 | 0 | 1 | 0 | 0 | 0 | 2 | 1 | 4 | 2 | 1 | 84  | 1,68 | 29,76 | 1 |
| 1319 | 0 | 1 | 0 | 0 | 0 | 2 | 1 | 4 | 2 | 1 | 84  | 1,68 | 29,76 | 1 |



|      |   |   |   |   |   |   |   |   |   |   |    |      |       |   |
|------|---|---|---|---|---|---|---|---|---|---|----|------|-------|---|
| 1320 | 1 | 0 | 0 | 0 | 0 | 1 | 1 | 2 | 1 | 0 | 72 | 1,73 | 24,06 | 0 |
| 1321 | 1 | 0 | 0 | 0 | 0 | 1 | 1 | 2 | 1 | 0 | 72 | 1,73 | 24,06 | 0 |
| 1322 | 1 | 0 | 0 | 0 | 0 | 3 | 1 | 4 | 1 | 2 | 59 | 1,65 | 21,67 | 0 |
| 1323 | 0 | 0 | 0 | 0 | 0 | 3 | 1 | 2 | 1 | 0 | 64 | 1,58 | 25,64 | 0 |
| 1324 | 0 | 0 | 0 | 0 | 1 | 3 | 0 | 1 | 0 | 0 | 61 | 1,62 | 23,24 | 0 |
| 1325 | 0 | 0 | 0 | 0 | 1 | 3 | 0 | 1 | 0 | 0 | 61 | 1,62 | 23,24 | 0 |
| 1326 | 0 | 0 | 0 | 0 | 0 | 6 | 1 | 2 | 1 | 0 | 64 | 1,68 | 22,68 | 0 |
| 1327 | 0 | 0 | 0 | 0 | 0 | 6 | 1 | 2 | 1 | 0 | 64 | 1,68 | 22,68 | 0 |
| 1328 | 0 | 0 | 0 | 0 | 1 | 1 | 0 | 1 | 0 | 0 | 65 | 1,7  | 22,49 | 0 |
| 1329 | 0 | 0 | 0 | 0 | 1 | 1 | 1 | 2 | 1 | 0 | 83 | 1,62 | 31,63 | 0 |
| 1330 | 0 | 0 | 0 | 0 | 0 | 1 | 0 | 1 | 0 | 0 | 74 | 1,76 | 23,89 | 0 |
| 1331 | 1 | 0 | 0 | 0 | 1 | 2 | 1 | 2 | 1 | 0 | 60 | 1,67 | 21,51 | 0 |
| 1332 | 1 | 0 | 0 | 0 | 0 | 1 | 1 | 3 | 1 | 1 | 57 | 1,57 | 23,12 | 0 |
| 1333 | 1 | 0 | 0 | 0 | 0 | 1 | 1 | 3 | 1 | 1 | 57 | 1,57 | 23,12 | 0 |
| 1334 | 1 | 0 | 0 | 0 | 1 | 1 | 1 | 3 | 2 | 0 | 78 | 1,68 | 27,64 | 0 |
| 1335 | 0 | 0 | 0 | 0 | 0 | 3 | 1 | 4 | 3 | 1 | 55 | 1,57 | 22,31 | 0 |
| 1336 | 0 | 0 | 0 | 0 | 0 | 3 | 1 | 4 | 3 | 1 | 55 | 1,57 | 22,31 | 0 |
| 1337 | 1 | 0 | 0 | 0 | 0 | 1 | 1 | 2 | 1 | 0 | 70 | 1,7  | 24,22 | 0 |
| 1338 | 1 | 0 | 0 | 0 | 0 | 1 | 1 | 2 | 1 | 0 | 70 | 1,7  | 24,22 | 0 |
| 1339 | 0 | 0 | 0 | 0 | 0 | 1 | 1 | 2 | 1 | 0 | 76 | 1,76 | 24,54 | 0 |
| 1340 | 0 | 0 | 0 | 0 | 0 | 1 | 1 | 2 | 1 | 0 | 76 | 1,76 | 24,54 | 0 |
| 1341 | 0 | 0 | 0 | 0 | 1 | 2 | 0 | 1 | 0 | 0 | 44 | 1,55 | 18,31 | 0 |
| 1342 | 0 | 0 | 0 | 0 | 1 | 2 | 0 | 1 | 0 | 0 | 44 | 1,55 | 18,31 | 0 |
| 1343 | 1 | 0 | 0 | 0 | 0 | 2 | 1 | 2 | 1 | 0 | 56 | 1,65 | 20,57 | 0 |
| 1344 | 1 | 0 | 0 | 0 | 0 | 2 | 1 | 2 | 1 | 0 | 56 | 1,65 | 20,57 | 0 |
| 1345 | 0 | 1 | 0 | 0 | 1 | 2 | 1 | 3 | 2 | 0 | 59 | 1,65 | 21,67 | 0 |
| 1346 | 0 | 1 | 0 | 0 | 1 | 2 | 1 | 3 | 2 | 0 | 59 | 1,65 | 21,67 | 0 |
| 1347 | 1 | 0 | 0 | 0 | 0 | 1 | 0 | 1 | 0 | 0 | 58 | 1,67 | 20,8  | 0 |
| 1348 | 1 | 0 | 0 | 0 | 0 | 1 | 0 | 1 | 0 | 0 | 58 | 1,67 | 20,8  | 0 |
| 1349 | 1 | 1 | 0 | 0 | 0 | 1 | 1 | 2 | 1 | 0 | 98 | 1,63 | 36,89 | 0 |
| 1350 | 0 | 0 | 0 | 0 | 0 | 3 | 0 | 1 | 0 | 0 | 63 | 1,57 | 25,56 | 0 |
| 1351 | 0 | 0 | 0 | 0 | 0 | 3 | 0 | 1 | 0 | 0 | 63 | 1,57 | 25,56 | 0 |
| 1352 | 1 | 1 | 0 | 1 | 0 | 1 | 1 | 2 | 1 | 0 | 53 | 1,66 | 19,23 | 0 |

|      |   |   |   |   |   |   |   |   |   |   |      |      |       |   |
|------|---|---|---|---|---|---|---|---|---|---|------|------|-------|---|
| 1353 | 1 | 1 | 0 | 1 | 0 | 1 | 1 | 2 | 1 | 0 | 53   | 1,66 | 19,23 | 0 |
| 1354 | 1 | 1 | 0 | 1 | 0 | 1 | 1 | 2 | 1 | 0 | 53   | 1,66 | 19,23 | 0 |
| 1355 | 1 | 1 | 0 | 0 | 0 | 1 | 1 | 2 | 1 | 0 | 65   | 1,58 | 26,04 | 0 |
| 1356 | 1 | 1 | 0 | 0 | 0 | 1 | 1 | 2 | 1 | 0 | 65   | 1,58 | 26,04 | 0 |
| 1357 | 1 | 1 | 0 | 0 | 0 | 1 | 1 | 2 | 1 | 0 | 65   | 1,58 | 26,04 | 0 |
| 1358 | 1 | 0 | 0 | 0 | 1 | 1 | 1 | 3 | 1 | 1 | 81   | 1,7  | 28,03 | 0 |
| 1359 | 1 | 0 | 0 | 0 | 1 | 1 | 1 | 3 | 1 | 1 | 81   | 1,7  | 28,03 | 0 |
| 1360 | 0 | 0 | 0 | 0 | 0 | 1 | 0 | 1 | 0 | 0 | 69   | 1,74 | 22,79 | 0 |
| 1361 | 0 | 0 | 0 | 0 | 0 | 1 | 0 | 1 | 0 | 0 | 69   | 1,74 | 22,79 | 0 |
| 1362 | 1 | 0 | 0 | 0 | 1 | 1 | 1 | 3 | 2 | 0 | 53   | 1,63 | 19,95 | 0 |
| 1363 | 0 | 0 | 0 | 0 | 1 | 1 | 0 | 1 | 0 | 0 | 58   | 1,65 | 21,3  | 0 |
| 1364 | 0 | 0 | 0 | 0 | 1 | 1 | 0 | 1 | 0 | 0 | 58   | 1,65 | 21,3  | 0 |
| 1365 | 1 | 0 | 0 | 0 | 1 | 2 | 1 | 4 | 1 | 2 | 58   | 1,65 | 21,3  | 0 |
| 1366 | 1 | 0 | 0 | 0 | 1 | 2 | 1 | 4 | 1 | 2 | 58   | 1,65 | 21,3  | 0 |
| 1367 | 0 | 0 | 0 | 0 | 0 | 1 | 1 | 2 | 1 | 0 | 77   | 1,74 | 25,43 | 0 |
| 1368 | 0 | 0 | 0 | 0 | 0 | 1 | 1 | 2 | 1 | 0 | 77   | 1,74 | 25,43 | 0 |
| 1369 | 0 | 0 | 0 | 0 | 1 | 6 | 1 | 2 | 1 | 0 | 64   | 1,65 | 23,51 | 0 |
| 1370 | 0 | 0 | 0 | 0 | 1 | 6 | 1 | 2 | 1 | 0 | 64   | 1,65 | 23,51 | 0 |
| 1371 | 0 | 0 | 0 | 0 | 0 | 1 | 1 | 2 | 1 | 0 | 69   | 1,62 | 26,29 | 0 |
| 1372 | 0 | 0 | 0 | 0 | 0 | 6 | 1 | 2 | 1 | 0 | 60   | 1,57 | 24,34 | 0 |
| 1373 | 0 | 0 | 0 | 0 | 0 | 6 | 1 | 2 | 1 | 0 | 60   | 1,57 | 24,34 | 0 |
| 1374 | 1 | 0 | 0 | 0 | 1 | 1 | 1 | 2 | 1 | 0 | 72   | 1,66 | 26,13 | 0 |
| 1375 | 1 | 0 | 0 | 0 | 1 | 1 | 1 | 2 | 1 | 0 | 72   | 1,66 | 26,13 | 0 |
| 1376 | 0 | 0 | 0 | 0 | 0 | 1 | 1 | 3 | 1 | 1 | 62   | 1,68 | 21,97 | 0 |
| 1377 | 0 | 0 | 0 | 0 | 0 | 1 | 1 | 3 | 1 | 1 | 62   | 1,68 | 21,97 | 0 |
| 1378 | 1 | 0 | 0 | 0 | 0 | 2 | 1 | 2 | 1 | 0 | 53   | 1,58 | 21,23 | 0 |
| 1379 | 1 | 0 | 0 | 0 | 0 | 2 | 1 | 2 | 1 | 0 | 53   | 1,58 | 21,23 | 0 |
| 1380 | 1 | 0 | 0 | 0 | 0 | 1 | 1 | 3 | 1 | 1 | 68   | 1,71 | 23,26 | 0 |
| 1381 | 0 | 0 | 0 | 0 | 0 | 3 | 1 | 2 | 1 | 0 | 59,5 | 1,68 | 21,08 | 0 |
| 1382 | 1 | 0 | 0 | 0 | 1 | 2 | 0 | 1 | 0 | 0 | 58   | 1,72 | 19,61 | 0 |
| 1383 | 1 | 0 | 0 | 0 | 1 | 2 | 0 | 1 | 0 | 0 | 58   | 1,72 | 19,61 | 0 |
| 1384 | 0 | 0 | 0 | 0 | 0 | 1 | 1 | 3 | 2 | 1 | 72   | 1,66 | 26,13 | 1 |
| 1385 | 0 | 0 | 0 | 0 | 0 | 1 | 1 | 3 | 2 | 1 | 72   | 1,66 | 26,13 | 1 |

|      |   |   |   |   |   |   |   |   |   |   |      |      |       |   |
|------|---|---|---|---|---|---|---|---|---|---|------|------|-------|---|
| 1386 | 0 | 1 | 0 | 1 | 0 | 1 | 1 | 2 | 1 | 0 | 63   | 1,65 | 23,14 | 0 |
| 1387 | 0 | 1 | 0 | 1 | 0 | 1 | 1 | 2 | 1 | 0 | 63   | 1,65 | 23,14 | 0 |
| 1388 | 0 | 1 | 0 | 1 | 0 | 1 | 1 | 2 | 1 | 0 | 63   | 1,65 | 23,14 | 0 |
| 1389 | 2 | 0 | 0 | 0 | 0 | 6 | 0 | 1 | 0 | 0 | 77   | 1,68 | 27,28 | 0 |
| 1390 | 2 | 0 | 0 | 0 | 0 | 6 | 0 | 1 | 0 | 0 | 77   | 1,68 | 27,28 | 0 |
| 1391 | 1 | 0 | 0 | 0 | 1 | 1 | 0 | 1 | 0 | 0 | 90   | 1,63 | 33,87 | 0 |
| 1392 | 1 | 0 | 0 | 0 | 1 | 1 | 0 | 1 | 0 | 0 | 90   | 1,63 | 33,87 | 0 |
| 1393 | 2 | 0 | 0 | 0 | 0 | 3 | 0 | 1 | 0 | 0 | 69   | 1,63 | 25,97 | 0 |
| 1394 | 2 | 0 | 0 | 0 | 0 | 3 | 0 | 1 | 0 | 0 | 69   | 1,63 | 25,97 | 0 |
| 1395 | 1 | 0 | 0 | 0 | 0 | 1 | 0 | 2 | 0 | 1 | 76   | 1,73 | 25,39 | 0 |
| 1396 | 1 | 0 | 0 | 0 | 1 | 1 | 0 | 3 | 0 | 2 | 74   | 1,63 | 27,85 | 0 |
| 1397 | 1 | 0 | 0 | 0 | 1 | 1 | 0 | 3 | 0 | 2 | 74   | 1,63 | 27,85 | 0 |
| 1398 | 1 | 0 | 0 | 0 | 1 | 1 | 0 | 3 | 0 | 2 | 74   | 1,63 | 27,85 | 0 |
| 1399 | 1 | 0 | 0 | 0 | 0 | 2 | 1 | 3 | 2 | 0 | 64   | 1,58 | 25,64 | 0 |
| 1400 | 1 | 0 | 0 | 0 | 0 | 2 | 1 | 3 | 2 | 0 | 64   | 1,58 | 25,64 | 0 |
| 1401 | 0 | 0 | 0 | 0 | 0 | 1 | 0 | 2 | 0 | 1 | 62,5 | 1,68 | 22,14 | 0 |
| 1402 | 0 | 0 | 0 | 0 | 0 | 2 | 1 | 4 | 3 | 0 | 66   | 1,56 | 27,12 | 0 |
| 1403 | 0 | 0 | 0 | 0 | 0 | 2 | 1 | 4 | 3 | 0 | 66   | 1,56 | 27,12 | 0 |
| 1404 | 1 | 0 | 1 | 0 | 0 | 2 | 0 | 1 | 0 | 0 | 66   | 1,58 | 26,44 | 0 |
| 1405 | 1 | 0 | 0 | 0 | 1 | 2 | 1 | 2 | 1 | 0 | 56   | 1,59 | 22,15 | 0 |
| 1406 | 0 | 0 | 0 | 0 | 0 | 1 | 0 | 1 | 0 | 0 | 58   | 1,68 | 20,55 | 0 |
| 1407 | 2 | 0 | 0 | 0 | 1 | 1 | 0 | 1 | 0 | 0 | 77   | 1,65 | 28,28 | 0 |
| 1408 | 2 | 0 | 0 | 0 | 1 | 1 | 0 | 1 | 0 | 0 | 77   | 1,65 | 28,28 | 0 |
| 1409 | 2 | 0 | 1 | 0 | 0 | 1 | 1 | 2 | 1 | 0 | 59   | 1,67 | 21,16 | 0 |
| 1410 | 2 | 0 | 1 | 0 | 0 | 1 | 1 | 2 | 1 | 0 | 59   | 1,67 | 21,16 | 0 |
| 1411 | 1 | 0 | 0 | 0 | 1 | 1 | 0 | 1 | 0 | 0 | 52   | 1,53 | 22,21 | 0 |
| 1412 | 1 | 0 | 0 | 0 | 0 | 1 | 1 | 2 | 1 | 0 | 60   | 1,61 | 23,15 | 0 |
| 1413 | 1 | 0 | 0 | 0 | 0 | 1 | 1 | 2 | 1 | 0 | 60   | 1,61 | 23,15 | 0 |
| 1414 | 2 | 0 | 0 | 0 | 1 | 1 | 1 | 2 | 1 | 0 | 57   | 1,68 | 20,2  | 0 |
| 1415 | 2 | 0 | 0 | 0 | 1 | 1 | 1 | 2 | 1 | 0 | 57   | 1,68 | 20,2  | 0 |
| 1416 | 0 | 0 | 0 | 0 | 0 | 1 | 0 | 1 | 0 | 0 | 62   | 1,7  | 21,45 | 0 |
| 1417 | 1 | 0 | 0 | 0 | 0 | 2 | 1 | 3 | 1 | 1 | 63   | 1,6  | 24,61 | 0 |
| 1418 | 1 | 0 | 0 | 0 | 0 | 2 | 1 | 3 | 1 | 1 | 63   | 1,6  | 24,61 | 0 |

|      |   |   |   |   |   |   |   |   |   |   |      |      |       |   |
|------|---|---|---|---|---|---|---|---|---|---|------|------|-------|---|
| 1419 | 0 | 0 | 0 | 0 | 1 | 1 | 0 | 1 | 0 | 0 | 72,8 | 1,73 | 24,32 | 0 |
| 1420 | 0 | 0 | 0 | 0 | 0 | 3 | 0 | 1 | 0 | 0 | 55   | 1,68 | 19,49 | 0 |
| 1421 | 1 | 0 | 0 | 0 | 0 | 1 | 1 | 2 | 1 | 0 | 64   | 1,7  | 22,15 | 0 |
| 1422 | 2 | 0 | 0 | 0 | 0 | 1 | 0 | 1 | 0 | 0 | 64   | 1,52 | 27,7  | 0 |
| 1423 | 2 | 0 | 0 | 0 | 0 | 1 | 0 | 1 | 0 | 0 | 64   | 1,52 | 27,7  | 0 |
| 1424 | 1 | 0 | 0 | 0 | 0 | 1 | 0 | 1 | 0 | 0 | 58   | 1,7  | 20,07 | 0 |
| 1425 | 1 | 0 | 0 | 0 | 0 | 1 | 0 | 1 | 0 | 0 | 58   | 1,7  | 20,07 | 0 |
| 1426 | 0 | 0 | 0 | 0 | 0 | 3 | 1 | 4 | 3 | 0 | 58   | 1,5  | 25,78 | 0 |
| 1427 | 0 | 0 | 0 | 0 | 0 | 3 | 1 | 4 | 3 | 0 | 58   | 1,5  | 25,78 | 0 |
| 1428 | 0 | 0 | 0 | 0 | 1 | 1 | 0 | 1 | 0 | 0 | 75   | 1,68 | 26,57 | 0 |
| 1429 | 0 | 0 | 0 | 0 | 1 | 1 | 0 | 1 | 0 | 0 | 75   | 1,68 | 26,57 | 0 |
| 1430 | 2 | 0 | 0 | 1 | 0 | 1 | 0 | 1 | 0 | 0 | 57   | 1,63 | 21,45 | 0 |
| 1431 | 2 | 0 | 0 | 1 | 0 | 1 | 0 | 1 | 0 | 0 | 57   | 1,63 | 21,45 | 0 |
| 1432 | 1 | 0 | 0 | 0 | 0 | 1 | 0 | 1 | 0 | 0 | 80   | 1,68 | 28,34 | 0 |
| 1433 | 1 | 0 | 0 | 0 | 0 | 1 | 0 | 1 | 0 | 0 | 80   | 1,68 | 28,34 | 0 |
| 1434 | 1 | 1 | 0 | 0 | 0 | 3 | 0 | 1 | 0 | 0 | 75   | 1,68 | 26,57 | 0 |
| 1435 | 1 | 1 | 0 | 0 | 0 | 3 | 0 | 1 | 0 | 0 | 75   | 1,68 | 26,57 | 0 |
| 1436 | 2 | 0 | 0 | 0 | 1 | 3 | 0 | 2 | 0 | 1 | 85   | 1,52 | 36,79 | 0 |
| 1437 | 2 | 0 | 0 | 0 | 1 | 3 | 0 | 2 | 0 | 1 | 85   | 1,52 | 36,79 | 0 |
| 1438 | 2 | 0 | 0 | 0 | 1 | 3 | 0 | 2 | 0 | 1 | 85   | 1,52 | 36,79 | 0 |
| 1439 | 0 | 1 | 0 | 0 | 0 | 1 | 0 | 2 | 0 | 1 | 73   | 1,49 | 32,88 | 0 |
| 1440 | 0 | 1 | 0 | 0 | 0 | 1 | 0 | 2 | 0 | 1 | 73   | 1,49 | 32,88 | 0 |
| 1441 | 1 | 0 | 0 | 0 | 0 | 1 | 0 | 1 | 0 | 0 | 57   | 1,67 | 20,44 | 0 |
| 1442 | 1 | 0 | 0 | 0 | 0 | 1 | 0 | 1 | 0 | 0 | 57   | 1,67 | 20,44 | 0 |
| 1443 | 1 | 0 | 0 | 0 | 1 | 1 | 1 | 3 | 1 | 1 | 58   | 1,68 | 20,55 | 0 |
| 1444 | 1 | 0 | 0 | 0 | 1 | 1 | 1 | 3 | 1 | 1 | 58   | 1,68 | 20,55 | 0 |
| 1445 | 2 | 0 | 0 | 0 | 1 | 1 | 0 | 2 | 0 | 1 | 80   | 1,73 | 26,73 | 0 |
| 1446 | 2 | 0 | 0 | 0 | 1 | 1 | 0 | 2 | 0 | 1 | 80   | 1,73 | 26,73 | 0 |
| 1447 | 0 | 0 | 0 | 0 | 0 | 2 | 0 | 1 | 0 | 0 | 52   | 1,65 | 19,1  | 0 |
| 1448 | 0 | 0 | 0 | 0 | 0 | 2 | 0 | 1 | 0 | 0 | 52   | 1,65 | 19,1  | 0 |
| 1449 | 0 | 1 | 0 | 0 | 1 | 1 | 0 | 1 | 0 | 0 | 72   | 1,73 | 24,06 | 0 |
| 1450 | 0 | 1 | 0 | 0 | 1 | 1 | 0 | 1 | 0 | 0 | 72   | 1,73 | 24,06 | 0 |
| 1451 | 1 | 0 | 0 | 0 | 0 | 3 | 0 | 2 | 0 | 1 | 55   | 1,54 | 23,19 | 0 |

|      |   |   |   |   |   |   |   |   |   |   |      |      |       |   |
|------|---|---|---|---|---|---|---|---|---|---|------|------|-------|---|
| 1452 | 1 | 0 | 0 | 0 | 0 | 3 | 0 | 2 | 0 | 1 | 55   | 1,54 | 23,19 | 0 |
| 1453 | 1 | 0 | 0 | 0 | 0 | 1 | 0 | 1 | 0 | 0 | 60   | 1,69 | 21,01 | 0 |
| 1454 | 2 | 0 | 0 | 0 | 1 | 1 | 0 | 1 | 0 | 0 | 89   | 1,65 | 32,69 | 0 |
| 1455 | 1 | 0 | 0 | 0 | 0 | 2 | 1 | 2 | 1 | 0 | 75   | 1,65 | 27,55 | 1 |
| 1456 | 1 | 0 | 0 | 0 | 0 | 2 | 1 | 2 | 1 | 0 | 75   | 1,65 | 27,55 | 1 |
| 1457 | 1 | 0 | 0 | 0 | 0 | 2 | 1 | 2 | 1 | 0 | 75   | 1,65 | 27,55 | 1 |
| 1458 | 0 | 0 | 0 | 0 | 1 | 3 | 1 | 2 | 1 | 0 | 51   | 1,63 | 19,2  | 0 |
| 1459 | 0 | 0 | 0 | 0 | 1 | 3 | 1 | 2 | 1 | 0 | 51   | 1,63 | 19,2  | 0 |
| 1460 | 1 | 0 | 0 | 0 | 0 | 2 | 0 | 2 | 0 | 1 | 57   | 1,7  | 19,72 | 0 |
| 1461 | 1 | 0 | 0 | 0 | 0 | 2 | 0 | 2 | 0 | 1 | 57   | 1,7  | 19,72 | 0 |
| 1462 | 1 | 0 | 0 | 0 | 0 | 1 | 1 | 5 | 3 | 1 | 54   | 1,63 | 20,32 | 0 |
| 1463 | 2 | 0 | 0 | 0 | 0 | 3 | 0 | 1 | 0 | 0 | 73   | 1,59 | 28,88 | 0 |
| 1464 | 2 | 0 | 0 | 0 | 0 | 3 | 0 | 1 | 0 | 0 | 73   | 1,59 | 28,88 | 0 |
| 1465 | 0 | 0 | 0 | 0 | 0 | 1 | 1 | 2 | 1 | 0 | 57   | 1,65 | 20,94 | 0 |
| 1466 | 0 | 0 | 0 | 0 | 0 | 1 | 1 | 2 | 1 | 0 | 57   | 1,65 | 20,94 | 0 |
| 1467 | 1 | 1 | 0 | 0 | 1 | 1 | 1 | 3 | 1 | 1 | 62   | 1,68 | 21,97 | 0 |
| 1468 | 1 | 1 | 0 | 0 | 1 | 1 | 1 | 3 | 1 | 1 | 62   | 1,68 | 21,97 | 0 |
| 1469 | 1 | 1 | 0 | 0 | 1 | 1 | 1 | 3 | 1 | 1 | 62   | 1,68 | 21,97 | 0 |
| 1470 | 0 | 0 | 0 | 0 | 0 |   | 0 | 1 | 0 | 0 | 65   | 1,69 | 22,76 | 0 |
| 1471 | 0 | 0 | 0 | 0 | 0 |   | 0 | 1 | 0 | 0 | 48   | 1,55 | 19,98 | 0 |
| 1472 | 0 | 0 | 0 | 0 | 0 |   | 0 | 1 | 0 | 0 | 75   | 1,56 | 30,82 | 0 |
| 1473 | 0 | 1 | 0 | 0 | 0 |   | 1 | 2 | 1 | 0 | 69,5 | 1,72 | 23,49 | 0 |
| 1474 | 0 | 0 | 0 | 0 | 0 |   | 1 | 2 | 1 | 0 | 63   | 1,72 | 21,3  | 0 |
| 1475 | 0 | 0 | 1 | 0 | 0 |   | 1 | 3 | 1 | 1 | 70   | 1,65 | 25,71 | 0 |
| 1476 | 0 | 0 | 1 | 0 | 0 |   | 1 | 3 | 1 | 1 | 70   | 1,65 | 25,71 | 0 |
| 1477 | 0 | 0 | 1 | 0 | 0 |   | 1 | 2 | 1 | 0 | 84   | 1,6  | 32,81 | 0 |
| 1478 | 0 | 0 | 1 | 0 | 0 |   | 1 | 3 | 2 | 0 | 55   | 1,52 | 23,81 | 0 |
| 1479 | 0 | 0 | 1 | 0 | 0 |   | 0 | 3 | 0 | 2 | 75   | 1,68 | 26,57 | 0 |
| 1480 | 0 | 0 | 1 | 0 | 0 |   | 1 | 3 | 2 | 0 | 55   | 1,52 | 23,81 | 0 |
| 1481 | 0 | 0 | 1 | 0 | 0 |   | 1 | 4 | 3 | 1 | 62   | 1,6  | 24,22 | 1 |
| 1482 | 0 | 0 | 1 | 0 | 0 |   | 1 | 4 | 3 | 1 | 62   | 1,6  | 24,22 | 1 |
| 1483 | 0 | 0 | 1 | 0 | 0 |   | 1 | 3 | 2 | 0 | 68   | 1,57 | 27,59 | 0 |
| 1484 | 0 | 0 | 1 | 0 | 0 |   | 1 | 3 | 2 | 0 | 68   | 1,57 | 27,59 | 0 |

|      |   |   |   |   |   |  |   |   |   |   |    |      |       |   |
|------|---|---|---|---|---|--|---|---|---|---|----|------|-------|---|
| 1485 | 2 | 1 | 0 | 0 | 0 |  | 1 | 4 | 3 | 0 | 69 | 1,6  | 26,95 | 0 |
| 1486 | 2 | 0 | 0 | 0 | 0 |  | 1 | 3 | 2 | 0 | 53 | 1,6  | 20,7  | 0 |
| 1487 | 2 | 0 | 0 | 0 | 0 |  | 1 | 3 | 2 | 0 | 53 | 1,6  | 20,7  | 0 |
| 1488 | 1 | 0 | 0 | 0 | 0 |  | 1 | 2 | 1 | 0 | 52 | 1,59 | 20,57 | 0 |
| 1489 | 1 | 0 | 0 | 0 | 0 |  | 1 | 5 | 3 | 1 | 85 | 1,68 | 30,12 | 0 |
| 1490 | 0 | 0 | 0 | 0 | 0 |  | 1 | 4 | 1 | 2 | 56 | 1,6  | 21,88 | 0 |
| 1491 | 0 | 0 | 0 | 0 | 0 |  | 1 | 4 | 1 | 2 | 56 | 1,6  | 21,88 | 0 |
| 1492 | 0 | 0 | 0 | 0 | 0 |  | 1 | 3 | 2 | 0 | 69 | 1,6  | 26,95 | 0 |
| 1493 | 0 | 0 | 0 | 0 | 0 |  | 1 | 2 | 1 | 0 | 53 | 1,67 | 19    | 0 |
| 1494 | 0 | 0 | 0 | 0 | 0 |  | 1 | 2 | 1 | 0 | 53 | 1,67 | 19    | 0 |
| 1495 | 0 | 0 | 0 | 0 | 0 |  | 1 | 3 | 2 | 0 | 69 | 1,6  | 26,95 | 0 |
| 1496 | 0 | 0 | 0 | 0 | 0 |  | 1 | 2 | 1 | 0 | 71 | 1,52 | 30,73 | 0 |
| 1497 | 0 | 0 | 0 | 0 | 0 |  | 1 | 2 | 1 | 0 | 71 | 1,52 | 30,73 | 0 |
| 1498 | 0 | 0 | 0 | 0 | 0 |  | 1 | 2 | 1 | 0 | 60 | 1,6  | 23,44 | 0 |
| 1499 | 0 | 0 | 0 | 0 | 0 |  | 1 | 2 | 1 | 0 | 60 | 1,6  | 23,44 | 0 |
| 1500 | 0 | 0 | 0 | 0 | 0 |  | 0 | 1 | 0 | 0 | 71 | 1,62 | 27,05 | 0 |
| 1501 | 0 | 0 | 0 | 0 | 0 |  | 1 | 2 | 1 | 0 | 63 | 1,72 | 21,3  | 0 |
| 1502 | 0 | 0 | 0 | 0 | 0 |  | 0 | 1 | 0 | 0 | 71 | 1,62 | 27,05 | 0 |
| 1503 | 0 | 0 | 0 | 0 | 0 |  | 0 | 2 | 0 | 1 | 66 | 1,78 | 20,83 | 0 |
| 1504 | 0 | 0 | 0 | 0 | 0 |  | 1 | 2 | 1 | 0 | 50 | 1,63 | 18,82 | 0 |
| 1505 | 0 | 0 | 0 | 0 | 0 |  | 0 | 2 | 0 | 1 | 66 | 1,78 | 20,83 | 0 |
| 1506 | 0 | 0 | 0 | 0 | 0 |  | 1 | 2 | 1 | 0 | 57 | 1,63 | 21,45 | 0 |
| 1507 | 0 | 0 | 0 | 0 | 0 |  | 1 | 2 | 1 | 0 | 57 | 1,63 | 21,45 | 0 |
| 1508 | 0 | 0 | 0 | 0 | 0 |  | 0 | 2 | 0 | 1 | 57 | 1,66 | 20,69 | 0 |
| 1509 | 0 | 0 | 0 | 0 | 0 |  | 0 | 1 | 0 | 0 | 64 | 1,73 | 21,38 | 0 |
| 1510 | 0 | 0 | 0 | 0 | 0 |  | 0 | 1 | 0 | 0 | 60 | 1,73 | 20,05 | 0 |
| 1511 | 0 | 0 | 0 | 0 | 0 |  | 0 | 1 | 0 | 0 | 64 | 1,73 | 21,38 | 0 |
| 1512 | 0 | 0 | 0 | 0 | 0 |  | 0 | 2 | 0 | 1 | 57 | 1,66 | 20,69 | 0 |
| 1513 | 0 | 0 | 0 | 0 | 0 |  | 0 | 1 | 0 | 0 | 76 | 1,79 | 23,72 | 0 |
| 1514 | 0 | 0 | 0 | 0 | 0 |  | 0 | 1 | 0 | 0 | 66 | 1,63 | 24,84 | 0 |
| 1515 | 0 | 0 | 0 | 0 | 0 |  | 0 | 1 | 0 | 0 | 66 | 1,63 | 24,84 | 0 |
| 1516 | 0 | 0 | 0 | 0 | 0 |  | 0 | 2 | 0 | 1 | 78 | 1,58 | 31,24 | 0 |
| 1517 | 0 | 0 | 0 | 0 | 0 |  | 0 | 1 | 0 | 0 | 76 | 1,79 | 23,72 | 0 |

|      |   |   |   |   |   |  |   |   |   |   |    |      |       |   |
|------|---|---|---|---|---|--|---|---|---|---|----|------|-------|---|
| 1518 | 0 | 0 | 0 | 0 | 0 |  | 0 | 2 | 0 | 1 | 78 | 1,58 | 31,24 | 0 |
| 1519 | 0 | 0 | 0 | 0 | 0 |  | 0 | 2 | 0 | 1 | 71 | 1,74 | 23,45 | 0 |
| 1520 | 0 | 0 | 0 | 0 | 0 |  | 0 | 1 | 0 | 0 | 63 | 1,65 | 23,14 | 0 |
| 1521 | 0 | 0 | 0 | 0 | 0 |  | 0 | 1 | 0 | 0 | 63 | 1,65 | 23,14 | 0 |
| 1522 | 0 | 0 | 0 | 0 | 0 |  | 1 | 3 | 2 | 0 | 79 | 1,73 | 26,4  | 0 |
| 1523 | 0 | 0 | 0 | 0 | 0 |  | 1 | 3 | 2 | 0 | 56 | 1,8  | 17,28 | 0 |
| 1524 | 0 | 0 | 0 | 0 | 0 |  | 1 | 3 | 2 | 0 | 56 | 1,8  | 17,28 | 0 |
| 1525 | 0 | 0 | 0 | 0 | 0 |  | 1 | 2 | 1 | 0 | 54 | 1,63 | 20,32 | 0 |
| 1526 | 0 | 0 | 0 | 0 | 0 |  | 0 | 1 | 0 | 0 | 66 | 1,6  | 25,78 | 0 |
| 1527 | 0 | 0 | 0 | 0 | 0 |  | 1 | 2 | 1 | 0 | 54 | 1,63 | 20,32 | 0 |
| 1528 | 0 | 0 | 0 | 0 | 0 |  | 0 | 1 | 0 | 0 | 66 | 1,6  | 25,78 | 0 |
| 1529 | 0 | 0 | 0 | 0 | 0 |  | 1 | 2 | 1 | 0 | 54 | 1,76 | 17,43 | 0 |
| 1530 | 0 | 0 | 0 | 0 | 0 |  | 1 | 2 | 1 | 0 | 54 | 1,76 | 17,43 | 0 |
| 1531 | 0 | 0 | 0 | 0 | 0 |  | 1 | 2 | 1 | 0 | 52 | 1,59 | 20,57 | 0 |
| 1532 | 0 | 0 | 0 | 0 | 0 |  | 1 | 3 | 2 | 0 | 64 | 1,63 | 24,09 | 0 |
| 1533 | 0 | 0 | 0 | 0 | 0 |  | 1 | 3 | 2 | 0 | 64 | 1,63 | 24,09 | 0 |
| 1534 | 0 | 0 | 0 | 0 | 0 |  | 0 | 1 | 0 | 0 | 55 | 1,7  | 19,03 | 0 |
| 1535 | 0 | 0 | 0 | 0 | 0 |  | 0 | 1 | 0 | 0 | 55 | 1,7  | 19,03 | 0 |
| 1536 | 0 | 0 | 0 | 0 | 0 |  | 0 | 1 | 0 | 0 | 96 | 1,68 | 34,01 | 0 |
| 1537 | 0 | 0 | 0 | 0 | 0 |  | 1 | 2 | 1 | 0 | 68 | 1,63 | 25,59 | 0 |
| 1538 | 0 | 0 | 0 | 0 | 0 |  | 1 | 2 | 1 | 0 | 68 | 1,63 | 25,59 | 0 |
| 1539 | 0 | 1 | 0 | 0 | 0 |  | 1 | 5 | 3 | 1 | 50 | 1,7  | 17,3  | 0 |
| 1540 | 0 | 0 | 0 | 0 | 0 |  | 1 | 5 | 2 | 2 | 77 | 1,76 | 24,86 | 0 |
| 1541 | 0 | 0 | 0 | 0 | 0 |  | 1 | 5 | 2 | 2 | 77 | 1,76 | 24,86 | 0 |
| 1542 | 0 | 1 | 0 | 0 | 0 |  | 1 | 5 | 3 | 1 | 50 | 1,7  | 17,3  | 0 |
| 1543 | 0 | 0 | 0 | 0 | 0 |  | 0 | 1 | 0 | 0 | 96 | 1,68 | 34,01 | 0 |
| 1544 | 0 | 0 | 0 | 0 | 0 |  | 0 | 2 | 0 | 1 | 56 | 1,61 | 21,6  | 0 |
| 1545 | 0 | 0 | 0 | 0 | 0 |  | 1 | 2 | 1 | 0 | 60 | 1,66 | 21,77 | 0 |
| 1546 | 0 | 0 | 0 | 0 | 0 |  | 0 | 2 | 0 | 1 | 56 | 1,61 | 21,6  | 0 |
| 1547 | 0 | 0 | 0 | 0 | 0 |  | 0 | 1 | 0 | 0 | 54 | 1,58 | 21,63 | 0 |
| 1548 | 0 | 0 | 0 | 0 | 0 |  | 0 | 1 | 0 | 0 | 54 | 1,58 | 21,63 | 0 |
| 1549 | 0 | 0 | 0 | 0 | 0 |  | 1 | 2 | 1 | 0 | 63 | 1,76 | 20,34 | 0 |
| 1550 | 0 | 0 | 0 | 0 | 0 |  | 0 | 1 | 0 | 0 | 59 | 1,68 | 20,9  | 0 |

|      |   |   |   |   |   |   |   |   |   |    |      |       |   |
|------|---|---|---|---|---|---|---|---|---|----|------|-------|---|
| 1551 | 0 | 0 | 0 | 0 | 0 | 0 | 1 | 0 | 0 | 59 | 1,68 | 20,9  | 0 |
| 1552 | 0 | 0 | 0 | 0 | 0 | 0 | 2 | 0 | 1 | 66 | 1,76 | 21,31 | 0 |
| 1553 | 0 | 0 | 0 | 0 | 0 | 0 | 2 | 0 | 1 | 66 | 1,76 | 21,31 | 0 |
| 1554 | 0 | 0 | 0 | 0 | 0 | 0 | 1 | 0 | 0 | 70 | 1,6  | 27,34 | 0 |
| 1555 | 0 | 0 | 0 | 0 | 0 | 0 | 1 | 0 | 0 | 70 | 1,6  | 27,34 | 0 |
| 1556 | 0 | 0 | 0 | 0 | 0 | 1 | 3 | 1 | 1 | 60 | 1,72 | 20,28 | 0 |
| 1557 | 0 | 0 | 0 | 0 | 0 | 0 | 1 | 0 | 0 | 64 | 1,68 | 22,68 | 0 |
| 1558 | 0 | 0 | 0 | 0 | 0 | 0 | 1 | 0 | 0 | 64 | 1,68 | 22,68 | 0 |
| 1559 | 0 | 0 | 0 | 0 | 0 | 1 | 3 | 1 | 1 | 60 | 1,72 | 20,28 | 0 |
| 1560 | 0 | 1 | 0 | 0 | 0 | 1 | 4 | 3 | 0 | 69 | 1,6  | 26,95 | 0 |
| 1561 | 0 | 0 | 0 | 0 | 0 | 1 | 3 | 1 | 1 | 53 | 1,68 | 18,78 | 0 |
| 1562 | 0 | 0 | 0 | 0 | 0 | 1 | 2 | 1 | 0 | 60 | 1,7  | 20,76 | 0 |
| 1563 | 0 | 0 | 0 | 0 | 0 | 1 | 2 | 1 | 0 | 60 | 1,7  | 20,76 | 0 |
| 1564 | 0 | 0 | 0 | 0 | 0 | 1 | 3 | 1 | 1 | 53 | 1,68 | 18,78 | 0 |
| 1565 | 0 | 0 | 0 | 0 | 0 | 0 | 2 | 0 | 1 | 68 | 1,78 | 21,46 | 0 |
| 1566 | 0 | 0 | 0 | 0 | 0 | 0 | 2 | 0 | 1 | 68 | 1,78 | 21,46 | 0 |
| 1567 | 0 | 0 | 0 | 0 | 0 | 0 | 1 | 0 | 0 | 69 | 1,68 | 24,45 | 0 |
| 1568 | 0 | 0 | 0 | 0 | 0 | 0 | 1 | 0 | 0 | 69 | 1,68 | 24,45 | 0 |
| 1569 | 0 | 0 | 0 | 0 | 0 | 1 | 2 | 1 | 0 | 60 | 1,76 | 19,37 | 0 |
| 1570 | 0 | 0 | 0 | 0 | 0 | 0 | 1 | 0 | 0 | 70 | 1,6  | 27,34 | 0 |
| 1571 | 0 | 0 | 0 | 0 | 0 | 0 | 2 | 0 | 1 | 64 | 1,7  | 22,15 | 0 |
| 1572 | 0 | 0 | 0 | 0 | 0 | 1 | 3 | 1 | 1 | 57 | 1,67 | 20,44 | 0 |
| 1573 | 0 | 0 | 0 | 0 | 0 | 0 | 2 | 0 | 1 | 58 | 1,63 | 21,83 | 0 |
| 1574 | 0 | 0 | 0 | 0 | 0 | 0 | 1 | 0 | 0 | 70 | 1,6  | 27,34 | 0 |
| 1575 | 0 | 0 | 0 | 0 | 0 | 1 | 3 | 1 | 1 | 57 | 1,67 | 20,44 | 0 |
| 1576 | 0 | 0 | 0 | 0 | 0 | 0 | 2 | 0 | 1 | 64 | 1,7  | 22,15 | 0 |
| 1577 | 0 | 0 | 0 | 0 | 0 | 0 | 2 | 0 | 1 | 58 | 1,63 | 21,83 | 0 |
| 1578 | 0 | 0 | 0 | 0 | 0 | 0 | 1 | 0 | 0 | 92 | 1,78 | 29,04 | 0 |
| 1579 | 0 | 0 | 0 | 0 | 0 | 0 | 1 | 0 | 0 | 92 | 1,78 | 29,04 | 0 |
| 1580 | 0 | 0 | 0 | 0 | 0 | 0 | 1 | 0 | 0 | 95 | 1,7  | 32,87 | 0 |
| 1581 | 0 | 0 | 0 | 0 | 0 | 0 | 1 | 0 | 0 | 95 | 1,7  | 32,87 | 0 |
| 1582 | 0 | 0 | 0 | 0 | 0 | 1 | 5 | 2 | 2 | 68 | 1,68 | 24,09 | 0 |
| 1583 | 0 | 0 | 0 | 0 | 0 | 1 | 2 | 1 | 0 | 58 | 1,7  | 20,07 | 0 |



|      |   |   |   |   |   |  |   |   |   |   |     |      |       |   |
|------|---|---|---|---|---|--|---|---|---|---|-----|------|-------|---|
| 1584 | 0 | 0 | 0 | 0 | 0 |  | 1 | 2 | 1 | 0 | 58  | 1,7  | 20,07 | 0 |
| 1585 | 0 | 0 | 0 | 0 | 0 |  | 1 | 3 | 1 | 1 | 57  | 1,58 | 22,83 | 0 |
| 1586 | 0 | 0 | 0 | 0 | 0 |  | 1 | 5 | 2 | 2 | 68  | 1,68 | 24,09 | 0 |
| 1587 | 0 | 0 | 0 | 0 | 0 |  | 1 | 3 | 1 | 1 | 57  | 1,58 | 22,83 | 0 |
| 1588 | 0 | 0 | 0 | 0 | 0 |  | 0 | 1 | 0 | 0 | 64  | 1,52 | 27,7  | 0 |
| 1589 | 0 | 0 | 0 | 0 | 0 |  | 0 | 1 | 0 | 0 | 64  | 1,52 | 27,7  | 0 |
| 1590 | 0 | 0 | 0 | 0 | 0 |  | 0 | 1 | 0 | 0 | 66  | 1,79 | 20,6  | 0 |
| 1591 | 0 | 0 | 0 | 0 | 0 |  | 0 | 1 | 0 | 0 | 66  | 1,79 | 20,6  | 0 |
| 1592 | 0 | 0 | 0 | 0 | 0 |  | 0 | 1 | 0 | 0 | 68  | 1,68 | 24,09 | 0 |
| 1593 | 0 | 0 | 0 | 0 | 0 |  | 0 | 1 | 0 | 0 | 68  | 1,68 | 24,09 | 0 |
| 1594 | 0 | 0 | 0 | 0 | 0 |  | 1 | 2 | 1 | 0 | 56  | 1,6  | 21,88 | 0 |
| 1595 | 0 | 0 | 0 | 0 | 0 |  | 1 | 2 | 1 | 0 | 56  | 1,6  | 21,88 | 0 |
| 1596 | 0 | 0 | 0 | 0 | 0 |  | 1 | 2 | 1 | 0 | 61  | 1,7  | 21,11 | 0 |
| 1597 | 0 | 0 | 0 | 0 | 0 |  | 1 | 5 | 3 | 1 | 85  | 1,68 | 30,12 | 0 |
| 1598 | 0 | 0 | 0 | 0 | 0 |  | 1 | 2 | 1 | 0 | 49  | 1,58 | 19,63 | 0 |
| 1599 | 0 | 0 | 0 | 0 | 0 |  | 0 | 1 | 0 | 0 | 57  | 1,65 | 20,94 | 0 |
| 1600 | 0 | 0 | 0 | 0 | 0 |  | 0 | 1 | 0 | 0 | 57  | 1,65 | 20,94 | 0 |
| 1601 | 0 | 0 | 0 | 0 | 0 |  | 1 | 2 | 1 | 0 | 61  | 1,69 | 21,36 | 0 |
| 1602 | 0 | 0 | 0 | 0 | 0 |  | 1 | 2 | 1 | 0 | 61  | 1,69 | 21,36 | 0 |
| 1603 | 0 | 0 | 0 | 0 | 0 |  | 1 | 2 | 1 | 0 | 49  | 1,58 | 19,63 | 0 |
| 1604 | 0 | 0 | 0 | 0 | 0 |  | 1 | 8 | 4 | 3 | 114 | 1,75 | 37,22 | 0 |
| 1605 | 0 | 0 | 0 | 0 | 0 |  | 0 | 1 | 0 | 0 | 92  | 1,62 | 35,06 | 0 |
| 1606 | 0 | 0 | 0 | 0 | 0 |  | 0 | 1 | 0 | 0 | 81  | 1,68 | 28,7  | 0 |
| 1607 | 0 | 0 | 0 | 0 | 0 |  | 1 | 6 | 3 | 2 | 95  | 1,76 | 30,67 | 0 |
| 1608 | 0 | 0 | 0 | 0 | 0 |  | 0 | 1 | 0 | 0 | 92  | 1,62 | 35,06 | 0 |
| 1609 | 0 | 0 | 0 | 0 | 0 |  | 1 | 4 | 1 | 2 | 56  | 1,7  | 19,38 | 0 |
| 1610 | 0 | 1 | 0 | 0 | 0 |  | 1 | 2 | 1 | 0 | 72  | 1,62 | 27,43 | 0 |
| 1611 | 0 | 1 | 0 | 0 | 0 |  | 1 | 2 | 1 | 0 | 72  | 1,62 | 27,43 | 0 |
| 1612 | 0 | 0 | 0 | 0 | 0 |  | 1 | 5 | 1 | 3 | 62  | 1,58 | 24,84 | 0 |
| 1613 | 0 | 0 | 0 | 0 | 0 |  | 0 | 1 | 0 | 0 | 81  | 1,68 | 28,7  | 0 |
| 1614 | 0 | 0 | 0 | 0 | 0 |  | 1 | 4 | 1 | 2 | 56  | 1,7  | 19,38 | 0 |
| 1615 | 0 | 0 | 0 | 0 | 0 |  | 1 | 6 | 3 | 2 | 95  | 1,76 | 30,67 | 0 |
| 1616 | 0 | 0 | 0 | 0 | 0 |  | 1 | 5 | 1 | 3 | 62  | 1,58 | 24,84 | 0 |

|      |   |   |   |   |   |   |   |   |   |    |      |       |   |
|------|---|---|---|---|---|---|---|---|---|----|------|-------|---|
| 1617 | 0 | 0 | 0 | 0 | 0 | 0 | 1 | 0 | 0 | 58 | 1,62 | 22,1  | 0 |
| 1618 | 0 | 0 | 0 | 0 | 0 | 0 | 1 | 0 | 0 | 58 | 1,62 | 22,1  | 0 |
| 1619 | 0 | 0 | 0 | 0 | 0 | 0 | 2 | 0 | 1 | 65 | 1,7  | 22,49 | 0 |
| 1620 | 0 | 0 | 0 | 0 | 0 | 0 | 2 | 0 | 1 | 65 | 1,7  | 22,49 | 0 |
| 1621 | 0 | 1 | 0 | 0 | 0 | 0 | 2 | 1 | 0 | 80 | 1,65 | 29,38 | 0 |
| 1622 | 0 | 1 | 0 | 0 | 0 | 0 | 2 | 1 | 0 | 80 | 1,65 | 29,38 | 0 |
| 1623 | 0 | 0 | 0 | 0 | 0 | 0 | 2 | 1 | 0 | 72 | 1,68 | 25,51 | 0 |
| 1624 | 0 | 0 | 0 | 0 | 0 | 0 | 1 | 0 | 0 | 55 | 1,7  | 19,03 | 0 |
| 1625 | 0 | 0 | 0 | 0 | 0 | 0 | 2 | 1 | 0 | 72 | 1,68 | 25,51 | 0 |
| 1626 | 0 | 0 | 0 | 0 | 0 | 0 | 2 | 1 | 0 | 67 | 1,67 | 24,02 | 0 |
| 1627 | 0 | 0 | 0 | 0 | 0 | 0 | 1 | 0 | 0 | 60 | 1,56 | 24,65 | 0 |
| 1628 | 0 | 0 | 0 | 0 | 0 | 0 | 2 | 1 | 0 | 67 | 1,67 | 24,02 | 0 |
| 1629 | 0 | 0 | 0 | 0 | 0 | 0 | 2 | 1 | 0 | 59 | 1,6  | 23,05 | 0 |
| 1630 | 0 | 0 | 0 | 0 | 0 | 0 | 2 | 1 | 0 | 59 | 1,6  | 23,05 | 0 |
| 1631 | 0 | 0 | 0 | 0 | 0 | 0 | 2 | 1 | 0 | 66 | 1,71 | 22,57 | 0 |
| 1632 | 0 | 0 | 0 | 0 | 0 | 0 | 3 | 1 | 1 | 67 | 1,76 | 21,63 | 0 |
| 1633 | 0 | 0 | 0 | 0 | 0 | 0 | 3 | 1 | 1 | 67 | 1,76 | 21,63 | 0 |
| 1634 | 0 | 0 | 0 | 0 | 0 | 0 | 1 | 0 | 0 | 56 | 1,68 | 19,84 | 0 |
| 1635 | 0 | 0 | 0 | 0 | 0 | 0 | 2 | 1 | 0 | 66 | 1,71 | 22,57 | 0 |
| 1636 | 0 | 0 | 0 | 0 | 0 | 0 | 1 | 0 | 0 | 56 | 1,68 | 19,84 | 0 |
| 1637 | 0 | 0 | 0 | 0 | 0 | 0 | 1 | 0 | 0 | 52 | 1,68 | 18,42 | 0 |
| 1638 | 0 | 0 | 0 | 0 | 0 | 0 | 3 | 0 | 2 | 66 | 1,57 | 26,78 | 0 |
| 1639 | 0 | 0 | 0 | 0 | 0 | 0 | 3 | 0 | 2 | 66 | 1,57 | 26,78 | 0 |
| 1640 | 0 | 0 | 0 | 0 | 0 | 0 | 1 | 0 | 0 | 60 | 1,66 | 21,77 | 0 |
| 1641 | 0 | 0 | 0 | 0 | 0 | 0 | 4 | 3 | 0 | 62 | 1,65 | 22,77 | 0 |
| 1642 | 0 | 0 | 0 | 0 | 0 | 0 | 1 | 0 | 0 | 60 | 1,66 | 21,77 | 0 |
| 1643 | 0 | 0 | 0 | 0 | 0 | 0 | 6 | 5 | 0 | 75 | 1,56 | 30,82 | 0 |
| 1644 | 0 | 1 | 0 | 0 | 0 | 0 | 3 | 2 | 0 | 90 | 1,64 | 33,46 | 0 |
| 1645 | 0 | 1 | 0 | 0 | 0 | 0 | 3 | 2 | 0 | 90 | 1,64 | 33,46 | 0 |
| 1646 | 0 | 0 | 0 | 0 | 0 | 0 | 6 | 5 | 0 | 75 | 1,56 | 30,82 | 0 |
| 1647 | 0 | 0 | 0 | 0 | 0 | 0 | 3 | 2 | 1 | 65 | 1,58 | 26,04 | 0 |
| 1648 | 0 | 0 | 0 | 0 | 0 | 0 | 3 | 2 | 1 | 65 | 1,58 | 26,04 | 0 |
| 1649 | 0 | 0 | 0 | 0 | 0 | 0 | 2 | 1 | 0 | 60 | 1,55 | 24,97 | 0 |

|      |   |   |   |   |   |  |   |   |   |   |    |      |       |   |
|------|---|---|---|---|---|--|---|---|---|---|----|------|-------|---|
| 1650 | 0 | 0 | 0 | 0 | 0 |  | 1 | 2 | 1 | 0 | 60 | 1,55 | 24,97 | 0 |
| 1651 | 0 | 0 | 0 | 0 | 0 |  | 0 | 1 | 0 | 0 | 68 | 1,73 | 22,72 | 0 |
| 1652 | 0 | 0 | 0 | 0 | 0 |  | 0 | 1 | 0 | 0 | 68 | 1,73 | 22,72 | 0 |
| 1653 | 0 | 0 | 0 | 0 | 0 |  | 0 | 1 | 0 | 0 | 94 | 1,8  | 29,01 | 0 |
| 1654 | 0 | 0 | 0 | 0 | 0 |  | 0 | 1 | 0 | 0 | 70 | 1,72 | 23,66 | 0 |
| 1655 | 0 | 0 | 0 | 0 | 0 |  | 1 | 2 | 1 | 0 | 76 | 1,62 | 28,96 | 0 |
| 1656 | 0 | 0 | 0 | 0 | 0 |  | 1 | 2 | 1 | 0 | 67 | 1,74 | 22,13 | 0 |
| 1657 | 0 | 0 | 0 | 0 | 0 |  | 0 | 1 | 0 | 0 | 70 | 1,72 | 23,66 | 0 |
| 1658 | 0 | 0 | 0 | 0 | 0 |  | 1 | 2 | 1 | 0 | 76 | 1,62 | 28,96 | 0 |
| 1659 | 0 | 0 | 0 | 0 | 0 |  | 1 | 2 | 1 | 0 | 67 | 1,74 | 22,13 | 0 |
| 1660 | 0 | 0 | 0 | 0 | 0 |  | 0 | 1 | 0 | 0 | 94 | 1,8  | 29,01 | 0 |
| 1661 | 0 | 0 | 0 | 0 | 0 |  | 1 | 2 | 1 | 0 | 75 | 1,67 | 26,89 | 0 |
| 1662 | 0 | 0 | 0 | 0 | 0 |  | 1 | 3 | 1 | 1 | 70 | 1,78 | 22,09 | 0 |
| 1663 | 0 | 0 | 0 | 0 | 0 |  | 1 | 3 | 1 | 1 | 70 | 1,78 | 22,09 | 0 |
| 1664 | 0 | 0 | 0 | 0 | 0 |  | 1 | 2 | 1 | 0 | 97 | 1,7  | 33,56 | 0 |
| 1665 | 0 | 0 | 0 | 0 | 0 |  | 1 | 2 | 1 | 0 | 97 | 1,7  | 33,56 | 0 |
| 1666 | 0 | 0 | 0 | 0 | 0 |  | 1 | 2 | 1 | 0 | 74 | 1,76 | 23,89 | 0 |
| 1667 | 0 | 0 | 0 | 0 | 0 |  | 1 | 2 | 1 | 0 | 74 | 1,76 | 23,89 | 0 |
| 1668 | 0 | 0 | 0 | 0 | 0 |  | 0 | 1 | 0 | 0 | 68 | 1,78 | 21,46 | 0 |
| 1669 | 0 | 0 | 0 | 0 | 0 |  | 0 | 1 | 0 | 0 | 68 | 1,78 | 21,46 | 0 |
| 1670 | 0 | 0 | 0 | 0 | 0 |  | 0 | 4 | 0 | 3 | 59 | 1,74 | 19,49 | 0 |
| 1671 | 0 | 0 | 0 | 0 | 0 |  | 0 | 4 | 0 | 3 | 59 | 1,74 | 19,49 | 0 |
| 1672 | 0 | 0 | 0 | 0 | 0 |  | 0 | 1 | 0 | 0 | 59 | 1,55 | 24,56 | 0 |
| 1673 | 0 | 0 | 0 | 0 | 0 |  | 0 | 1 | 0 | 0 | 59 | 1,55 | 24,56 | 0 |
| 1674 | 0 | 0 | 0 | 0 | 0 |  | 0 | 2 | 0 | 1 | 88 | 1,63 | 33,12 | 0 |
| 1675 | 0 | 0 | 0 | 0 | 0 |  | 0 | 2 | 0 | 1 | 88 | 1,63 | 33,12 | 0 |
| 1676 | 0 | 0 | 0 | 0 | 0 |  | 0 | 1 | 0 | 0 | 57 | 1,73 | 19,05 | 0 |
| 1677 | 0 | 0 | 0 | 0 | 0 |  | 1 | 3 | 1 | 1 | 61 | 1,68 | 21,61 | 0 |
| 1678 | 0 | 0 | 0 | 0 | 0 |  | 1 | 3 | 1 | 1 | 61 | 1,68 | 21,61 | 0 |
| 1679 | 0 | 0 | 0 | 0 | 0 |  | 0 | 1 | 0 | 0 | 90 | 1,66 | 32,66 | 0 |
| 1680 | 0 | 0 | 0 | 0 | 0 |  | 0 | 1 | 0 | 0 | 90 | 1,66 | 32,66 | 0 |
| 1681 | 0 | 0 | 0 | 0 | 0 |  | 1 | 3 | 1 | 1 | 48 | 1,58 | 19,23 | 1 |
| 1682 | 0 | 0 | 0 | 0 | 0 |  | 1 | 3 | 1 | 1 | 48 | 1,58 | 19,23 | 1 |

|      |   |   |   |   |   |  |   |   |   |   |     |      |       |   |
|------|---|---|---|---|---|--|---|---|---|---|-----|------|-------|---|
| 1683 | 0 | 0 | 0 | 0 | 0 |  | 1 | 3 | 2 | 0 | 61  | 1,6  | 23,83 | 0 |
| 1684 | 0 | 0 | 0 | 0 | 0 |  | 1 | 3 | 2 | 0 | 61  | 1,6  | 23,83 | 0 |
| 1685 | 0 | 0 | 0 | 0 | 0 |  | 1 | 4 | 3 | 0 | 80  | 1,58 | 32,05 | 0 |
| 1686 | 0 | 0 | 0 | 0 | 0 |  | 1 | 4 | 3 | 0 | 80  | 1,58 | 32,05 | 0 |
| 1687 | 0 | 0 | 0 | 0 | 0 |  | 1 | 2 | 1 | 0 | 52  | 1,64 | 19,33 | 0 |
| 1688 | 0 | 0 | 0 | 0 | 0 |  | 1 | 2 | 1 | 0 | 52  | 1,64 | 19,33 | 0 |
| 1689 | 0 | 0 | 0 | 0 | 0 |  | 0 | 1 | 0 | 0 | 98  | 1,68 | 34,72 | 0 |
| 1690 | 0 | 0 | 0 | 0 | 0 |  | 0 | 1 | 0 | 0 | 98  | 1,68 | 34,72 | 0 |
| 1691 | 1 | 0 | 0 | 1 | 0 |  | 1 | 5 | 1 | 3 | 72  | 1,6  | 28,12 | 0 |
| 1692 | 0 | 0 | 0 | 1 | 0 |  | 1 | 5 | 1 | 3 | 72  | 1,6  | 28,12 | 0 |
| 1693 | 0 | 0 | 1 | 0 | 0 |  | 0 | 1 | 0 | 0 | 69  | 1,64 | 25,65 | 0 |
| 1694 | 0 | 0 | 1 | 0 | 0 |  | 0 | 1 | 0 | 0 | 69  | 1,64 | 25,65 | 0 |
| 1695 | 0 | 0 | 0 | 0 | 0 |  | 1 | 2 | 1 | 0 | 65  | 1,67 | 23,31 | 0 |
| 1696 | 0 | 0 | 0 | 0 | 0 |  | 1 | 2 | 1 | 0 | 65  | 1,67 | 23,31 | 0 |
| 1697 | 0 | 0 | 0 | 1 | 0 |  | 1 | 5 | 1 | 3 | 90  | 1,6  | 35,16 | 0 |
| 1698 | 0 | 1 | 0 | 0 | 0 |  | 1 | 2 | 1 | 0 | 58  | 1,68 | 20,55 | 0 |
| 1699 | 0 | 1 | 0 | 0 | 0 |  | 1 | 2 | 1 | 0 | 58  | 1,68 | 20,55 | 0 |
| 1700 | 0 | 0 | 0 | 0 | 0 |  | 1 | 2 | 1 | 0 | 63  | 1,64 | 23,42 | 0 |
| 1701 | 0 | 0 | 0 | 0 | 0 |  | 0 | 1 | 0 | 0 | 99  | 1,72 | 33,46 | 0 |
| 1702 | 0 | 0 | 0 | 0 | 0 |  | 0 | 1 | 0 | 0 | 59  | 1,62 | 22,48 | 0 |
| 1703 | 0 | 0 | 0 | 0 | 0 |  | 0 | 1 | 0 | 0 | 52  | 1,59 | 20,57 | 0 |
| 1704 | 0 | 0 | 0 | 0 | 0 |  | 0 | 2 | 0 | 1 | 99  | 1,7  | 34,26 | 0 |
| 1705 | 0 | 0 | 0 | 0 | 0 |  | 0 | 1 | 0 | 0 | 80  | 1,7  | 27,68 | 0 |
| 1706 | 0 | 0 | 0 | 0 | 0 |  | 0 | 1 | 0 | 0 | 64  | 1,69 | 22,41 | 0 |
| 1707 | 0 | 0 | 0 | 0 | 0 |  | 0 | 1 | 0 | 0 | 71  | 1,73 | 23,72 | 0 |
| 1708 | 0 | 0 | 0 | 0 | 0 |  | 0 | 1 | 0 | 0 | 67  | 1,64 | 24,91 | 0 |
| 1709 | 0 | 0 | 0 | 0 | 0 |  | 0 | 1 | 0 | 0 | 85  | 1,59 | 33,62 | 0 |
| 1710 | 0 | 0 | 0 | 0 | 0 |  | 0 | 1 | 0 | 0 | 45  | 1,7  | 15,57 | 0 |
| 1711 | 0 | 1 | 0 | 0 | 0 |  | 1 | 2 | 1 | 0 | 102 | 1,52 | 44,15 | 0 |
| 1712 | 0 | 0 | 0 | 0 | 0 |  | 0 | 1 | 0 | 0 | 79  | 1,75 | 25,8  | 0 |
| 1713 | 0 | 1 | 0 | 0 | 0 |  | 1 | 3 | 2 | 0 | 68  | 1,64 | 25,28 | 0 |
| 1714 | 0 | 0 | 0 | 0 | 0 |  | 0 | 1 | 0 | 0 | 85  | 1,67 | 30,48 | 0 |
| 1715 | 0 | 0 | 0 | 0 | 0 |  | 0 | 1 | 0 | 0 | 79  | 1,75 | 25,8  | 0 |

|      |   |   |   |   |   |   |   |   |   |   |     |      |       |   |
|------|---|---|---|---|---|---|---|---|---|---|-----|------|-------|---|
| 1716 | 0 | 0 | 0 | 0 | 0 | 0 | 0 | 1 | 0 | 0 | 86  | 1,74 | 28,41 | 0 |
| 1717 | 0 | 0 | 0 | 0 | 0 | 0 | 0 | 1 | 0 | 0 | 57  | 1,65 | 20,94 | 0 |
| 1718 | 0 | 0 | 0 | 0 | 0 | 0 | 0 | 1 | 0 | 0 | 75  | 1,75 | 24,49 | 0 |
| 1719 | 0 | 1 | 0 | 0 | 0 | 0 | 0 | 2 | 0 | 1 | 65  | 1,66 | 23,59 | 0 |
| 1720 | 0 | 0 | 0 | 0 | 0 | 0 | 0 | 1 | 0 | 0 | 78  | 1,65 | 28,65 | 0 |
| 1721 | 0 | 1 | 0 | 0 | 0 | 0 | 1 | 3 | 2 | 0 | 69  | 1,68 | 24,45 | 0 |
| 1722 | 0 | 0 | 0 | 0 | 0 | 0 | 1 | 3 | 1 | 1 | 78  | 1,5  | 34,67 | 0 |
| 1723 | 0 | 0 | 0 | 0 | 0 | 0 | 0 | 4 | 0 | 3 | 66  | 1,51 | 28,95 | 0 |
| 1724 | 0 | 1 | 0 | 0 | 0 | 0 | 0 | 1 | 0 | 0 | 80  | 1,73 | 26,73 | 0 |
| 1725 | 0 | 1 | 0 | 0 | 0 | 0 | 1 | 2 | 1 | 0 | 68  | 1,52 | 29,43 | 0 |
| 1726 | 0 | 0 | 0 | 0 | 0 | 0 | 0 | 2 | 0 | 1 | 64  | 1,68 | 22,68 | 0 |
| 1727 | 0 | 0 | 0 | 0 | 0 | 0 | 1 | 2 | 1 | 0 |     | 1,53 |       | 0 |
| 1728 | 0 | 1 | 0 | 0 | 0 | 0 | 1 | 4 | 2 | 1 | 81  | 1,74 | 26,75 | 0 |
| 1729 | 0 | 0 | 0 | 0 | 0 | 0 | 0 | 2 | 0 | 1 | 68  | 1,68 | 24,09 | 0 |
| 1730 | 0 | 1 | 0 | 0 | 0 | 0 | 1 | 2 | 1 | 0 | 60  | 1,6  | 23,44 | 0 |
| 1731 | 0 | 0 | 0 | 0 | 0 | 0 | 1 | 3 | 2 | 0 | 62  | 1,64 | 23,05 | 0 |
| 1732 | 0 | 1 | 0 | 0 | 0 | 0 | 1 | 5 | 3 | 1 | 64  | 1,67 | 22,95 | 0 |
| 1733 | 0 | 1 | 0 | 0 | 0 | 0 | 1 | 5 | 3 | 1 | 64  | 1,67 | 22,95 | 0 |
| 1734 | 0 | 1 | 0 | 0 | 0 | 0 | 1 | 2 | 1 | 0 | 50  | 1,53 | 21,36 | 0 |
| 1735 | 0 | 0 | 0 | 0 | 0 | 0 | 0 | 1 | 0 | 0 | 65  | 1,62 | 24,77 | 0 |
| 1736 | 0 | 1 | 0 | 1 | 0 | 0 | 1 | 3 | 2 | 0 | 68  | 1,6  | 26,56 | 0 |
| 1737 | 0 | 1 | 0 | 1 | 0 | 0 | 1 | 2 | 1 | 0 | 79  | 1,7  | 27,34 | 0 |
| 1738 | 0 | 1 | 0 | 1 | 0 | 0 | 1 | 2 | 1 | 0 | 79  | 1,7  | 27,34 | 0 |
| 1739 | 0 | 1 | 0 | 1 | 0 | 0 | 1 | 2 | 1 | 0 | 79  | 1,7  | 27,34 | 0 |
| 1740 | 0 | 0 | 0 | 0 | 0 | 0 | 0 | 1 | 0 | 0 | 83  | 1,71 | 28,38 | 0 |
| 1741 | 0 | 0 | 0 | 0 | 0 | 0 | 0 | 1 | 0 | 0 | 83  | 1,71 | 28,38 | 0 |
| 1742 | 0 | 0 | 0 | 0 | 0 | 0 | 0 | 1 | 0 | 0 | 83  | 1,71 | 28,38 | 0 |
| 1743 | 0 | 0 | 1 | 0 | 0 | 0 | 0 | 1 | 0 | 0 | 64  | 1,65 | 23,51 | 0 |
| 1744 | 0 | 0 | 0 | 0 | 0 | 0 | 1 | 3 | 2 | 0 | 150 | 1,7  | 51,9  | 0 |
| 1745 | 0 | 0 | 0 | 0 | 0 | 0 | 0 | 1 | 0 | 0 | 78  | 1,62 | 29,72 | 0 |
| 1746 | 0 | 0 | 0 | 0 | 0 | 0 | 0 | 1 | 0 | 0 | 70  | 1,72 | 23,66 | 0 |
| 1747 | 0 | 0 | 0 | 0 | 0 | 0 | 0 | 1 | 0 | 0 | 70  | 1,72 | 23,66 | 0 |
| 1748 | 0 | 0 | 0 | 0 | 0 | 0 | 1 | 2 | 1 | 0 | 52  | 1,67 | 18,65 | 0 |

|      |   |   |   |   |   |   |   |   |   |   |      |      |       |   |
|------|---|---|---|---|---|---|---|---|---|---|------|------|-------|---|
| 1749 | 0 | 0 | 0 | 0 | 0 |   | 0 | 1 | 0 | 0 | 48   | 1,65 | 17,63 | 0 |
| 1750 | 0 | 0 | 1 | 0 | 0 |   | 0 | 2 | 0 | 1 |      | 1,55 |       | 0 |
| 1751 | 0 | 0 | 0 | 0 | 0 |   | 1 | 3 | 2 | 0 | 63   | 1,66 | 22,86 | 0 |
| 1752 | 0 | 0 | 0 | 0 | 0 |   | 1 | 3 | 2 | 0 | 63   | 1,66 | 22,86 | 0 |
| 1753 | 0 | 0 | 1 | 0 | 0 | 1 | 1 | 2 | 1 | 0 | 76   | 1,65 | 27,92 | 0 |
| 1754 | 0 | 0 | 0 | 0 | 0 | 1 | 0 | 2 | 0 | 1 | 60   | 1,66 | 21,77 | 0 |
| 1755 | 0 | 0 | 0 | 0 | 0 | 1 | 0 | 2 | 0 | 1 | 60   | 1,66 | 21,77 | 0 |
| 1756 | 0 | 1 | 1 | 0 | 0 |   | 0 | 1 | 0 | 0 | 85   | 1,65 | 31,22 | 0 |
| 1757 | 0 | 1 | 0 | 0 | 0 |   | 0 | 1 | 0 | 0 | 85   | 1,65 | 31,22 | 0 |
| 1758 | 0 | 0 | 0 | 0 | 0 |   | 1 | 2 | 1 | 0 | 76   | 1,66 | 27,58 | 0 |
| 1759 | 0 | 0 | 0 | 0 | 0 |   | 1 | 3 | 1 | 1 | 76   | 1,56 | 31,23 | 0 |
| 1760 | 0 | 0 | 0 | 0 | 0 |   | 0 | 1 | 0 | 0 |      | 1,66 |       | 0 |
| 1761 | 0 | 0 | 0 | 0 | 0 |   | 1 | 2 | 1 | 0 | 89   | 1,65 | 32,69 | 0 |
| 1762 | 0 | 0 | 0 | 0 | 0 |   | 0 | 2 | 0 | 1 | 55   | 1,76 | 17,76 | 0 |
| 1763 | 0 | 0 | 0 | 0 | 0 |   | 0 | 2 | 0 | 1 | 70   | 1,6  | 27,34 | 0 |
| 1764 | 0 | 0 | 0 | 0 | 0 |   | 0 | 1 | 0 | 0 | 120  | 1,75 | 39,18 | 0 |
| 1765 | 0 | 0 | 0 | 0 | 0 |   | 0 | 1 | 0 | 0 | 95   | 1,75 | 31,02 | 0 |
| 1766 | 0 | 0 | 0 | 0 | 0 |   | 0 | 1 | 0 | 0 | 67,5 | 1,67 | 24,20 | 0 |
| 1767 | 0 | 0 | 0 | 0 | 0 |   | 0 | 1 | 0 | 0 | 51,5 | 1,7  | 17,82 | 0 |
| 1768 | 0 | 0 | 0 | 0 | 0 |   | 0 | 1 | 0 | 0 | 75   | 1,6  | 29,30 | 0 |
| 1769 | 0 | 0 | 0 | 0 | 0 |   | 0 | 1 | 0 | 0 | 64   | 1,63 | 24,09 | 0 |
| 1770 | 0 | 0 | 0 | 0 | 0 |   | 1 | 2 | 1 | 0 | 70   | 1,71 | 23,94 | 0 |
| 1771 | 0 | 0 | 0 | 0 | 0 |   | 0 | 1 | 0 | 0 | 70   | 1,7  | 24,22 | 0 |
| 1772 | 0 | 0 | 0 | 0 | 0 |   | 0 | 1 | 0 | 0 | 96   | 1,52 | 41,55 | 0 |
| 1773 | 0 | 0 | 0 | 0 | 0 |   | 0 | 1 | 0 | 0 | 114  | 1,75 | 37,22 | 0 |
| 1774 | 0 | 0 | 0 | 0 | 0 |   | 0 | 1 | 0 | 0 | 65   | 1,63 | 24,46 | 0 |
| 1775 | 0 | 0 | 0 | 0 | 0 |   | 0 | 1 | 0 | 0 | 66   | 1,77 | 21,07 | 0 |
| 1776 | 0 | 0 | 0 | 0 | 0 |   | 0 | 1 | 0 | 0 | 49,5 | 1,55 | 20,60 | 0 |
| 1777 | 0 | 0 | 0 | 0 | 0 |   | 0 | 1 | 0 | 0 | 60   | 1,63 | 22,58 | 0 |
| 1778 | 0 | 0 | 0 | 0 | 0 |   | 0 | 4 | 0 | 3 | 73   | 1,56 | 30,00 | 0 |
| 1779 | 0 | 0 | 0 | 0 | 0 |   | 0 | 1 | 0 | 0 | 78   | 1,72 | 26,37 | 0 |
| 1780 | 0 | 0 | 0 | 0 | 0 |   | 1 | 3 | 1 | 1 | 82   | 1,7  | 28,37 | 1 |
| 1781 | 0 | 0 | 0 | 0 | 0 |   | 0 | 1 | 0 | 0 | 98   | 1,79 | 30,59 | 0 |

|      |   |   |   |   |   |   |   |   |   |   |     |      |       |   |
|------|---|---|---|---|---|---|---|---|---|---|-----|------|-------|---|
| 1782 | 1 | 0 | 0 | 0 | 0 | 0 | 0 | 2 | 0 | 1 | 72  | 1,65 | 26,45 | 0 |
| 1783 | 0 | 1 | 0 | 0 | 0 | 0 | 0 | 1 | 0 | 0 | 65  | 1,69 | 22,76 | 0 |
| 1784 | 0 | 0 | 0 | 0 | 0 | 0 | 1 | 3 | 1 | 1 | 78  | 1,8  | 24,07 | 0 |
| 1785 | 0 | 1 | 0 | 0 | 0 | 0 | 1 | 2 | 1 | 0 | 89  | 1,59 | 35,2  | 0 |
| 1786 | 0 | 1 | 0 | 0 | 0 | 0 | 1 | 2 | 1 | 0 | 89  | 1,59 | 35,2  | 0 |
| 1787 | 0 | 0 | 0 | 0 | 0 | 0 | 1 | 2 | 1 | 0 | 60  | 1,62 | 22,86 | 0 |
| 1788 | 0 | 0 | 0 | 0 | 0 | 0 | 0 | 2 | 0 | 1 | 76  | 1,63 | 28,6  | 0 |
| 1789 | 0 | 0 | 0 | 0 | 0 | 0 | 1 | 3 | 2 | 0 | 60  | 1,63 | 22,58 | 0 |
| 1790 | 0 | 0 | 0 | 0 | 0 | 0 | 0 | 1 | 0 | 0 | 60  | 1,71 | 20,52 | 0 |
| 1791 | 0 | 0 | 0 | 0 | 0 | 0 | 0 | 1 | 0 | 0 | 74  | 1,7  | 25,61 | 0 |
| 1792 | 0 | 0 | 0 | 0 | 0 | 0 | 0 | 1 | 0 | 0 | 59  | 1,61 | 22,76 | 0 |
| 1793 | 0 | 1 | 0 | 0 | 0 | 0 | 1 | 2 | 1 | 0 | 69  | 1,69 | 24,16 | 0 |
| 1794 | 0 | 0 | 0 | 0 | 0 | 0 | 1 | 3 | 1 | 1 | 71  | 1,67 | 25,46 | 0 |
| 1795 | 0 | 0 | 0 | 0 | 0 | 0 | 0 | 1 | 0 | 0 | 65  | 1,66 | 23,59 | 0 |
| 1796 | 0 | 0 | 0 | 0 | 0 | 0 | 1 | 2 | 1 | 0 | 88  | 1,68 | 31,18 | 0 |
| 1797 | 0 | 0 | 0 | 0 | 0 | 0 | 0 | 1 | 0 | 0 | 68  | 1,63 | 25,59 | 0 |
| 1798 | 0 | 0 | 0 | 0 | 0 | 0 | 0 | 1 | 0 | 0 | 49  | 1,58 | 19,63 | 0 |
| 1799 | 0 | 0 | 0 | 0 | 0 | 0 | 0 | 1 | 0 | 0 | 45  | 1,54 | 18,97 | 0 |
| 1800 | 0 | 0 | 0 | 0 | 0 | 0 | 0 | 1 | 0 | 0 | 52  | 1,67 | 18,65 | 0 |
| 1801 | 0 | 0 | 0 | 0 | 0 | 0 | 0 | 1 | 0 | 0 | 61  | 1,64 | 22,68 | 0 |
| 1802 | 0 | 0 | 0 | 0 | 0 | 0 | 0 | 1 | 0 | 0 | 55  | 1,55 | 22,89 | 0 |
| 1803 | 0 | 0 | 0 | 0 | 0 | 0 | 0 | 1 | 0 | 0 | 75  | 1,65 | 27,55 | 0 |
| 1804 | 0 | 0 | 0 | 0 | 0 | 0 | 0 | 1 | 0 | 0 | 63  | 1,7  | 21,8  | 0 |
| 1805 | 0 | 0 | 0 | 0 | 0 | 0 | 0 | 1 | 0 | 0 | 58  | 1,6  | 22,66 | 0 |
| 1806 | 0 | 0 | 0 | 0 | 0 | 0 | 0 | 1 | 0 | 0 | 74  | 1,72 | 25,01 | 0 |
| 1807 | 0 | 1 | 0 | 0 | 0 | 0 | 0 | 1 | 0 | 0 | 73  | 1,7  | 25,26 | 1 |
| 1808 | 0 | 0 | 0 | 0 | 0 | 0 | 0 | 1 | 0 | 0 | 55  | 1,52 | 23,81 | 0 |
| 1809 | 0 | 0 | 0 | 0 | 0 | 0 | 1 | 2 | 1 | 0 | 64  | 1,63 | 24,09 | 0 |
| 1810 | 0 | 0 | 0 | 0 | 0 | 0 | 0 | 1 | 0 | 0 | 55  | 1,58 | 22,03 | 0 |
| 1811 | 0 | 0 | 0 | 0 | 0 | 0 | 1 | 4 | 2 | 1 | 61  | 1,63 | 22,96 | 0 |
| 1812 | 0 | 0 | 0 | 0 | 0 | 0 | 0 | 1 | 0 | 0 | 103 | 1,7  | 35,64 | 0 |
| 1813 | 0 | 0 | 0 | 0 | 0 | 0 | 0 | 1 | 0 | 0 | 61  | 1,66 | 22,14 | 0 |
| 1814 | 0 | 0 | 0 | 0 | 0 | 0 | 0 | 1 | 0 | 0 | 67  | 1,64 | 24,91 | 0 |

|      |   |   |   |   |   |   |   |   |   |   |     |      |       |   |
|------|---|---|---|---|---|---|---|---|---|---|-----|------|-------|---|
| 1815 | 0 | 0 | 0 | 0 | 0 |   | 1 | 2 | 1 | 0 | 59  | 1,69 | 20,66 | 0 |
| 1816 | 0 | 0 | 0 | 0 | 0 |   | 0 | 1 | 0 | 0 | 40  | 1,5  | 17,78 | 0 |
| 1817 | 0 | 0 | 0 | 0 | 0 |   | 0 | 1 | 0 | 0 | 61  | 1,61 | 23,53 | 0 |
| 1818 | 0 | 0 | 0 | 0 | 0 |   | 0 | 3 | 0 | 2 | 50  | 1,66 | 18,14 | 0 |
| 1819 | 0 | 0 | 0 | 0 | 0 |   | 0 | 1 | 0 | 0 | 76  | 1,63 | 28,6  | 0 |
| 1820 | 0 | 0 | 0 | 0 | 0 |   | 0 | 1 | 0 | 0 | 90  | 1,69 | 31,51 | 0 |
| 1821 | 0 | 0 | 0 | 0 | 0 |   | 0 | 1 | 0 | 0 | 74  | 1,72 | 25,01 | 0 |
| 1822 | 0 | 0 | 0 | 0 | 0 |   | 0 | 2 | 0 | 1 |     | 1,7  |       | 0 |
| 1823 | 0 | 0 | 0 | 0 | 0 |   | 0 | 1 | 0 | 0 | 62  | 1,67 | 22,23 | 0 |
| 1824 | 0 | 0 | 0 | 0 | 0 |   | 0 | 1 | 0 | 0 | 57  | 1,56 | 23,42 | 0 |
| 1825 | 0 | 0 | 0 | 0 | 0 |   | 0 | 1 | 0 | 0 | 74  | 1,61 | 28,55 | 0 |
| 1826 | 0 | 0 | 0 | 0 | 0 |   | 0 | 2 | 0 | 1 | 77  | 1,63 | 28,98 | 0 |
| 1827 | 0 | 0 | 0 | 0 | 0 |   | 0 | 1 | 0 | 0 | 55  | 1,6  | 21,48 | 0 |
| 1828 | 0 | 0 | 0 | 0 | 0 |   | 0 | 1 | 0 | 0 | 103 | 1,76 | 33,25 | 0 |
| 1829 | 0 | 0 | 0 | 0 | 0 |   | 0 | 1 | 0 | 0 | 76  | 1,73 | 25,39 | 0 |
| 1830 | 0 | 0 | 0 | 0 | 0 |   | 1 | 2 | 1 | 0 | 63  | 1,63 | 23,71 | 0 |
| 1831 | 0 | 0 | 0 | 0 | 0 |   | 1 | 3 | 1 | 1 | 75  | 1,68 | 26,57 | 0 |
| 1832 | 1 | 1 | 0 | 0 | 0 | 2 | 0 | 1 | 0 | 0 | 64  | 1,64 | 23,8  | 0 |
| 1833 | 2 | 0 | 0 | 0 | 0 | 1 | 0 | 1 | 0 | 0 | 89  | 1,65 | 32,69 | 0 |
| 1834 | 2 | 0 | 0 | 0 | 0 | 1 | 0 | 1 | 0 | 0 | 89  | 1,65 | 32,69 | 0 |
| 1835 | 2 | 1 | 0 | 0 | 0 | 3 | 0 | 1 | 0 | 0 | 74  | 1,6  | 28,91 | 0 |
| 1836 | 0 | 0 | 0 | 0 | 0 |   | 0 | 2 | 0 | 1 | 55  | 1,6  | 21,48 | 0 |
| 1837 | 0 | 0 | 0 | 0 | 0 |   | 0 | 3 | 0 | 2 | 62  | 1,73 | 20,72 | 0 |
| 1838 | 0 | 0 | 0 | 0 | 0 |   | 0 | 1 | 0 | 0 | 68  | 1,68 | 24,09 | 0 |
| 1839 | 0 | 0 | 0 | 0 | 0 |   | 0 | 3 | 0 | 2 | 90  | 1,74 | 29,73 | 0 |
| 1840 | 0 | 0 | 0 | 0 | 0 |   | 0 | 3 | 0 | 2 | 90  | 1,74 | 29,73 | 0 |
| 1841 | 0 | 0 | 0 | 0 | 0 |   | 0 | 1 | 0 | 0 | 74  | 1,6  | 28,91 | 0 |
| 1842 | 0 | 0 | 0 | 0 | 0 |   | 1 | 4 | 3 | 0 | 65  | 1,65 | 23,88 | 0 |
| 1843 | 0 | 0 | 0 | 0 | 0 |   | 1 | 4 | 3 | 0 | 65  | 1,65 | 23,88 | 0 |
| 1844 | 0 | 0 | 0 | 0 | 0 |   | 0 | 1 | 0 | 0 | 66  | 1,58 | 26,44 | 0 |
| 1845 | 0 | 1 | 0 | 0 | 0 |   | 0 | 1 | 0 | 0 | 97  | 1,75 | 31,67 | 0 |
| 1846 | 0 | 0 | 0 | 0 | 0 |   | 1 | 3 | 1 | 1 | 85  | 1,75 | 27,76 | 0 |
| 1847 | 0 | 0 | 0 | 0 | 0 |   | 0 | 2 | 0 | 1 | 58  | 1,67 | 20,8  | 0 |



|      |   |   |   |   |   |  |   |    |   |   |     |      |       |   |
|------|---|---|---|---|---|--|---|----|---|---|-----|------|-------|---|
| 1848 | 0 | 1 | 0 | 0 | 0 |  | 1 | 4  | 2 | 1 | 70  | 1,76 | 22,6  | 0 |
| 1849 | 0 | 1 | 0 | 0 | 0 |  | 1 | 4  | 2 | 1 | 70  | 1,76 | 22,6  | 0 |
| 1850 | 0 | 1 | 0 | 0 | 0 |  | 1 | 2  | 1 | 0 | 59  | 1,62 | 22,48 | 0 |
| 1851 | 0 | 1 | 0 | 0 | 0 |  | 1 | 2  | 1 | 0 | 59  | 1,62 | 22,48 | 0 |
| 1852 | 0 | 0 | 0 | 0 | 0 |  | 1 | 2  | 1 | 0 | 76  | 1,63 | 28,6  | 0 |
| 1853 | 0 | 0 | 0 | 0 | 0 |  | 0 | 1  | 0 | 0 | 68  | 1,77 | 21,71 | 0 |
| 1854 | 0 | 0 | 0 | 0 | 0 |  | 0 | 1  | 0 | 0 | 52  | 1,53 | 22,21 | 0 |
| 1855 | 0 | 1 | 0 | 0 | 0 |  | 0 | 1  | 0 | 0 | 58  | 1,69 | 20,31 | 0 |
| 1856 | 0 | 0 | 0 | 0 | 0 |  | 0 | 1  | 0 | 0 | 51  | 1,58 | 20,43 | 0 |
| 1857 | 0 | 0 | 0 | 0 | 0 |  | 0 | 1  | 0 | 0 | 79  | 1,63 | 29,73 | 0 |
| 1858 | 1 | 0 | 0 | 0 | 0 |  | 0 | 1  | 0 | 0 | 64  | 1,78 | 20,2  | 0 |
| 1859 | 0 | 0 | 0 | 0 | 0 |  | 0 | 2  | 0 | 1 | 58  | 1,72 | 19,61 | 0 |
| 1860 | 0 | 0 | 0 | 0 | 0 |  | 0 | 2  | 0 | 1 | 58  | 1,72 | 19,61 | 0 |
| 1861 | 0 | 0 | 0 | 0 | 0 |  | 0 | 2  | 0 | 1 | 58  | 1,72 | 19,61 | 0 |
| 1862 | 0 | 0 | 0 | 0 | 0 |  | 0 | 2  | 0 | 1 | 53  | 1,68 | 18,78 | 0 |
| 1863 | 0 | 0 | 0 | 0 | 0 |  | 0 | 1  | 0 | 0 | 47  | 1,55 | 19,56 | 0 |
| 1864 | 0 | 0 | 0 | 0 | 0 |  | 1 | 2  | 1 | 0 | 108 | 1,7  | 37,37 | 0 |
| 1865 | 0 | 0 | 0 | 0 | 0 |  | 0 | 1  | 0 | 0 |     | 1,64 |       | 0 |
| 1866 | 0 | 0 | 0 | 0 | 0 |  | 1 | 3  | 2 | 0 |     | 1,62 |       | 0 |
| 1867 | 0 | 1 | 0 | 1 | 0 |  | 1 | 2  | 1 | 0 | 61  | 1,57 | 24,75 | 0 |
| 1868 | 0 | 0 | 0 | 0 | 0 |  | 0 | 1  | 0 | 0 | 58  | 1,64 | 21,56 | 0 |
| 1869 | 0 | 0 | 0 | 0 | 0 |  | 0 | 1  | 0 | 0 | 58  | 1,67 | 20,8  | 0 |
| 1870 | 0 | 0 | 0 | 0 | 0 |  | 0 | 1  | 0 | 0 |     | 1,65 |       | 0 |
| 1871 | 0 | 0 | 0 | 0 | 0 |  | 0 | 3  | 0 | 2 |     | 1,65 |       | 0 |
| 1872 | 0 | 0 | 0 | 0 | 0 |  | 1 | 2  | 1 | 0 | 82  | 1,75 | 26,78 | 0 |
| 1873 | 0 | 0 | 0 | 0 | 0 |  | 0 | 1  | 0 | 0 | 118 | 1,63 | 44,41 | 0 |
| 1874 | 0 | 0 | 0 | 0 | 0 |  | 0 | 10 | 0 | 0 | 50  | 1,62 | 19,05 | 0 |
| 1875 | 0 | 0 | 0 | 0 | 0 |  | 0 | 1  | 0 | 0 | 56  | 1,64 | 20,82 | 0 |
| 1876 | 0 | 0 | 0 | 0 | 0 |  | 0 | 1  | 0 | 0 | 56  | 1,64 | 20,82 | 0 |
| 1877 | 0 | 0 | 0 | 0 | 0 |  | 0 | 1  | 0 | 0 | 56  | 1,64 | 20,82 | 0 |
| 1878 | 0 | 0 | 0 | 0 | 0 |  | 0 | 2  | 0 | 1 | 132 | 1,7  | 45,67 | 0 |
| 1879 | 0 | 0 | 0 | 0 | 0 |  | 1 | 3  | 1 | 1 | 70  | 1,65 | 25,71 | 0 |
| 1880 | 0 | 0 | 0 | 0 | 0 |  | 0 | 1  | 0 | 0 | 55  | 1,68 | 19,49 | 0 |

|      |   |   |   |   |   |   |   |   |   |   |      |      |       |   |
|------|---|---|---|---|---|---|---|---|---|---|------|------|-------|---|
| 1881 | 1 | 1 | 0 | 0 | 0 | 1 | 0 | 3 | 0 | 2 | 72   | 1,7  | 24,91 | 0 |
| 1882 | 0 | 0 | 1 | 0 | 0 |   | 1 | 2 | 1 | 0 | 113  | 1,72 | 38,2  | 0 |
| 1883 | 0 | 0 | 1 | 0 | 0 |   | 0 | 1 | 0 | 0 | 92   | 1,7  | 31,83 | 0 |
| 1884 | 0 | 0 | 1 | 0 | 0 |   | 0 | 1 | 0 | 0 | 102  | 1,71 | 34,88 | 0 |
| 1885 | 0 | 0 | 1 | 0 | 0 |   | 1 | 7 | 3 | 3 | 48   | 1,52 | 20,78 | 0 |
| 1886 | 2 | 0 | 1 | 0 | 0 | 1 | 0 | 1 | 0 | 0 | 70   | 1,7  | 24,22 | 0 |
| 1887 | 0 | 0 | 0 | 0 | 0 |   | 1 | 2 | 1 | 0 | 97   | 1,7  | 33,56 | 0 |
| 1888 | 1 | 1 | 1 | 0 | 0 |   | 1 | 2 | 1 | 0 | 66   | 1,58 | 26,44 | 0 |
| 1889 | 2 | 0 | 0 | 0 | 0 | 1 | 0 | 1 | 0 | 0 | 62   | 1,61 | 23,92 | 0 |
| 1890 | 2 | 0 | 0 | 0 | 0 | 1 | 0 | 1 | 0 | 0 | 62   | 1,61 | 23,92 | 0 |
| 1891 | 2 | 0 | 0 | 0 | 0 | 1 | 0 | 1 | 0 | 0 | 62   | 1,61 | 23,92 | 0 |
| 1892 | 0 | 0 | 1 | 0 | 0 | 1 | 0 | 1 | 0 | 0 | 127  | 1,7  | 43,94 | 0 |
| 1893 | 0 | 0 | 0 | 0 | 0 | 1 | 1 | 2 | 1 | 0 | 68   | 1,65 | 24,98 | 1 |
| 1894 | 0 | 0 | 0 | 0 | 0 | 6 | 1 | 2 | 1 | 0 | 53   | 1,65 | 19,47 | 0 |
| 1895 | 0 | 0 | 0 | 0 | 0 | 6 | 1 | 2 | 1 | 0 | 53   | 1,65 | 19,47 | 0 |
| 1896 | 0 | 0 | 0 | 0 | 0 | 6 | 1 | 2 | 1 | 0 | 53   | 1,65 | 19,47 | 0 |
| 1897 | 0 | 0 | 0 | 0 | 0 | 1 | 0 | 2 | 0 | 1 | 83   | 1,65 | 30,49 | 0 |
| 1898 | 0 | 0 | 0 | 0 | 0 | 1 | 0 | 2 | 0 | 1 | 83   | 1,65 | 30,49 | 0 |
| 1899 | 1 | 0 | 0 | 0 | 1 | 1 | 0 | 2 | 0 | 1 | 66   | 1,72 | 22,31 | 0 |
| 1900 | 1 | 0 | 0 | 0 | 1 | 1 | 0 | 2 | 0 | 1 | 66   | 1,72 | 22,31 | 0 |
| 1901 | 1 | 0 | 0 | 0 | 1 | 1 | 0 | 2 | 0 | 1 | 66   | 1,72 | 22,31 | 0 |
| 1902 | 2 | 0 | 0 | 0 | 0 | 1 | 0 | 1 | 0 | 0 | 64   | 1,65 | 23,51 | 0 |
| 1903 | 2 | 0 | 0 | 0 | 0 | 1 | 0 | 1 | 0 | 0 | 64   | 1,65 | 23,51 | 0 |
| 1904 | 2 | 0 | 0 | 0 | 0 | 1 | 0 | 1 | 0 | 0 | 64   | 1,65 | 23,51 | 0 |
| 1905 | 1 | 0 | 0 | 0 | 0 | 1 | 0 | 2 | 0 | 1 | 56,8 | 1,58 | 22,75 | 0 |
| 1906 | 2 | 0 | 0 | 0 | 0 | 2 | 0 | 1 | 0 | 0 | 63   | 1,67 | 22,59 | 0 |
| 1907 | 2 | 0 | 0 | 0 | 0 | 2 | 0 | 1 | 0 | 0 | 63   | 1,67 | 22,59 | 0 |
| 1908 | 2 | 0 | 0 | 0 | 0 | 2 | 0 | 1 | 0 | 0 | 63   | 1,67 | 22,59 | 0 |
| 1909 | 2 | 1 | 0 | 0 | 0 | 1 | 1 | 2 | 1 | 0 | 57   | 1,61 | 21,99 | 0 |
| 1910 | 2 | 1 | 0 | 0 | 0 | 1 | 1 | 2 | 1 | 0 | 57   | 1,61 | 21,99 | 0 |
| 1911 | 2 | 1 | 0 | 0 | 0 | 1 | 1 | 2 | 1 | 0 | 57   | 1,61 | 21,99 | 0 |
| 1912 | 1 | 1 | 0 | 0 | 0 | 1 | 1 | 2 | 1 | 0 | 65   | 1,69 | 22,76 | 0 |
| 1913 | 1 | 1 | 0 | 0 | 0 | 1 | 1 | 2 | 1 | 0 | 65   | 1,69 | 22,76 | 0 |

|      |   |   |   |   |   |   |   |   |   |   |      |      |       |   |
|------|---|---|---|---|---|---|---|---|---|---|------|------|-------|---|
| 1914 | 1 | 1 | 0 | 0 | 0 | 1 | 1 | 2 | 1 | 0 | 65   | 1,69 | 22,76 | 0 |
| 1915 | 0 | 0 | 0 | 0 | 0 | 2 | 0 | 1 | 0 | 0 | 53   | 1,53 | 22,64 | 0 |
| 1916 | 1 | 0 | 0 | 0 | 0 | 2 | 1 | 5 | 3 | 1 | 60   | 1,65 | 22,04 | 0 |
| 1917 | 1 | 0 | 0 | 0 | 0 | 2 | 1 | 5 | 3 | 1 | 60   | 1,65 | 22,04 | 0 |
| 1918 | 1 | 0 | 0 | 0 | 0 | 2 | 1 | 5 | 3 | 1 | 60   | 1,65 | 22,04 | 0 |
| 1919 | 1 | 0 | 1 | 0 | 1 | 1 | 0 | 1 | 0 | 0 | 112  | 1,76 | 36,16 | 0 |
| 1920 | 2 | 1 | 0 | 0 | 0 | 1 | 0 | 2 | 0 | 1 | 58   | 1,63 | 21,83 | 0 |
| 1921 | 2 | 1 | 0 | 0 | 0 | 1 | 0 | 2 | 0 | 1 | 58   | 1,63 | 21,83 | 0 |
| 1922 | 0 | 0 | 1 | 0 | 1 | 3 | 0 | 1 | 0 | 0 | 80   | 1,73 | 26,73 | 0 |
| 1923 | 1 | 1 | 0 | 0 | 0 | 2 | 1 | 2 | 1 | 0 | 87   | 1,68 | 30,82 | 0 |
| 1924 | 1 | 1 | 0 | 0 | 0 | 2 | 1 | 2 | 1 | 0 | 87   | 1,68 | 30,82 | 0 |
| 1925 | 1 | 1 | 0 | 0 | 0 | 2 | 1 | 2 | 1 | 0 | 87   | 1,68 | 30,82 | 0 |
| 1926 | 1 | 0 | 0 | 0 | 0 | 1 | 0 | 1 | 0 | 0 | 99   | 1,72 | 33,46 | 0 |
| 1927 | 1 | 0 | 0 | 0 | 0 | 1 | 0 | 1 | 0 | 0 | 99   | 1,72 | 33,46 | 0 |
| 1928 | 2 | 0 | 0 | 0 | 1 | 1 | 0 | 1 | 0 | 0 | 76   | 1,76 | 24,54 | 0 |
| 1929 | 2 | 0 | 0 | 0 | 1 | 1 | 0 | 1 | 0 | 0 | 76   | 1,76 | 24,54 | 0 |
| 1930 | 1 | 0 | 0 | 0 | 0 | 6 | 1 | 4 | 2 | 1 | 69   | 1,72 | 23,32 | 1 |
| 1931 | 1 | 0 | 0 | 0 | 0 | 6 | 1 | 4 | 2 | 1 | 69   | 1,72 | 23,32 | 1 |
| 1932 | 1 | 0 | 0 | 0 | 0 | 6 | 1 | 4 | 2 | 1 | 69   | 1,72 | 23,32 | 1 |
| 1933 | 0 | 0 | 1 | 0 | 0 | 1 | 0 | 2 | 0 | 1 | 66   | 1,66 | 23,95 | 0 |
| 1934 | 2 | 1 | 0 | 1 | 0 | 2 | 1 | 3 | 2 | 0 | 72   | 1,7  | 24,91 | 0 |
| 1935 | 1 | 0 | 0 | 1 | 0 | 1 | 0 | 1 | 0 | 0 | 75   | 1,8  | 23,15 | 0 |
| 1936 | 0 | 0 | 1 | 0 | 0 |   | 0 | 1 | 0 | 0 | 101  | 1,7  | 34,95 | 0 |
| 1937 | 0 | 0 | 0 | 0 | 0 |   | 0 | 1 | 0 | 0 | 60   | 1,7  | 20,76 | 0 |
| 1938 | 2 | 0 | 0 | 0 | 0 |   | 0 | 1 | 0 | 0 | 78   | 1,5  | 34,67 | 0 |
| 1939 | 0 | 0 | 0 | 0 | 0 |   | 1 | 2 | 1 | 0 | 70   | 1,65 | 25,71 | 0 |
| 1940 | 0 | 1 | 0 | 0 | 0 |   | 1 | 2 | 1 | 0 | 60   | 1,65 | 22,04 | 0 |
| 1941 | 0 | 0 | 0 | 0 | 0 |   | 0 | 1 | 0 | 0 | 95   | 1,65 | 34,89 | 0 |
| 1942 | 0 | 0 | 0 | 0 | 0 |   | 0 | 1 | 0 | 0 | 60   | 1,64 | 22,31 | 0 |
| 1943 | 0 | 1 | 0 | 0 | 0 |   | 0 | 1 | 0 | 0 | 64,2 | 1,56 | 26,38 | 1 |
| 1944 | 0 | 0 | 0 | 0 | 0 |   | 0 | 2 | 0 | 1 | 57   | 1,57 | 23,12 | 0 |
| 1945 | 0 | 0 | 0 | 0 | 0 |   | 0 | 1 | 0 | 0 |      | 1,55 |       | 0 |
| 1946 | 0 | 0 | 0 | 0 | 0 |   | 0 | 1 | 0 | 0 | 78   | 1,58 | 31,24 | 0 |

|      |   |   |   |   |   |   |   |   |   |       |      |       |   |
|------|---|---|---|---|---|---|---|---|---|-------|------|-------|---|
| 1947 | 0 | 0 | 0 | 0 | 0 | 1 | 2 | 1 | 0 | 114,8 | 1,77 | 36,64 | 0 |
| 1948 | 0 | 0 | 0 | 0 | 0 | 1 | 5 | 3 | 1 | 69    | 1,55 | 28,72 | 0 |
| 1949 | 0 | 0 | 0 | 0 | 0 | 0 | 1 | 0 | 0 | 65    | 1,59 | 25,71 | 0 |
| 1950 | 0 | 0 | 0 | 0 | 0 | 0 | 1 | 0 | 0 | 67    | 1,65 | 24,61 | 0 |
| 1951 | 0 | 0 | 0 | 0 | 0 | 0 | 1 | 0 | 0 | 78    | 1,61 | 30,09 | 0 |
| 1952 | 0 | 0 | 0 | 0 | 0 | 0 | 1 | 0 | 0 | 64    | 1,63 | 24,09 | 0 |
| 1953 | 0 | 0 | 0 | 0 | 0 | 0 | 1 | 0 | 0 | 57    | 1,58 | 22,83 | 0 |
| 1954 | 0 | 0 | 0 | 0 | 0 | 0 | 1 | 0 | 0 | 59    | 1,6  | 23,05 | 0 |
| 1955 | 0 | 0 | 0 | 0 | 0 | 0 | 1 | 0 | 0 | 54,5  | 1,66 | 19,78 | 0 |
| 1956 | 0 | 0 | 0 | 0 | 0 | 0 | 1 | 0 | 0 | 70    | 1,73 | 23,39 | 0 |
| 1957 | 0 | 0 | 0 | 0 | 0 | 0 | 1 | 0 | 0 | 76    | 1,8  | 23,46 | 0 |
| 1958 | 0 | 0 | 0 | 0 | 0 | 0 | 2 | 0 | 1 | 59    | 1,7  | 20,42 | 0 |
| 1959 | 0 | 0 | 0 | 0 | 0 | 0 | 1 | 0 | 0 | 77    | 1,65 | 28,28 | 0 |
| 1960 | 0 | 0 | 0 | 0 | 0 | 0 | 1 | 0 | 0 | 127   | 1,68 | 45,00 | 0 |
| 1961 | 0 | 0 | 0 | 0 | 0 | 0 | 2 | 0 | 1 | 70    | 1,7  | 24,22 | 0 |
| 1962 | 0 | 0 | 0 | 0 | 0 | 0 | 1 | 0 | 0 | 65    | 1,52 | 28,13 | 0 |
| 1963 | 0 | 0 | 0 | 0 | 0 | 0 | 1 | 0 | 0 | 100   | 1,63 | 37,64 | 0 |
| 1964 | 0 | 0 | 0 | 0 | 0 | 0 | 1 | 0 | 0 | 68    | 1,65 | 24,98 | 0 |
| 1965 | 0 | 0 | 0 | 0 | 0 | 0 | 1 | 0 | 0 | 49,5  | 1,53 | 21,15 | 0 |
| 1966 | 0 | 0 | 0 | 0 | 0 | 1 | 2 | 1 | 0 | 76    | 1,5  | 33,78 | 0 |
| 1967 | 0 | 0 | 0 | 0 | 0 | 1 | 6 | 1 | 4 |       | 1,72 |       | 0 |
| 1968 | 0 | 0 | 0 | 0 | 0 | 0 | 1 | 0 | 0 | 60    | 1,55 | 24,97 | 0 |
| 1969 | 0 | 0 | 0 | 0 | 0 | 0 | 2 | 0 | 1 | 88    | 1,65 | 32,32 | 0 |
| 1970 | 0 | 0 | 0 | 0 | 0 | 1 | 2 | 1 | 0 | 76    | 1,68 | 26,93 | 0 |
| 1971 | 0 | 0 | 0 | 0 | 0 | 0 | 1 | 0 | 0 | 65    | 1,67 | 23,31 | 0 |
| 1972 | 0 | 0 | 0 | 0 | 0 | 1 | 3 | 2 | 0 | 115   | 1,75 | 37,55 | 0 |
| 1973 | 0 | 0 | 0 | 0 | 0 | 0 | 1 | 0 | 0 | 112   | 1,76 | 36,16 | 0 |
| 1974 | 0 | 0 | 0 | 0 | 0 | 0 | 4 | 0 | 3 | 111   | 1,68 | 39,33 | 0 |
| 1975 | 0 | 0 | 0 | 0 | 0 | 0 | 1 | 0 | 0 | 76    | 1,72 | 25,69 | 0 |
| 1976 | 0 | 0 | 0 | 0 | 0 | 1 | 3 | 2 | 0 | 68    | 1,57 | 27,59 | 0 |
| 1977 | 0 | 0 | 0 | 0 | 0 | 0 | 1 | 0 | 0 | 69    | 1,69 | 24,16 | 0 |
| 1978 | 0 | 1 | 0 | 0 | 0 | 1 | 5 | 3 | 1 | 95    | 1,52 | 41,12 | 0 |
| 1979 | 0 | 0 | 0 | 0 | 0 | 1 | 3 | 2 | 0 | 64    | 1,64 | 23,80 | 0 |

|      |   |   |   |   |   |   |   |   |   |      |      |       |   |
|------|---|---|---|---|---|---|---|---|---|------|------|-------|---|
| 1980 | 0 | 0 | 0 | 0 | 0 | 0 | 1 | 0 | 0 | 75   | 1,72 | 25,35 | 0 |
| 1981 | 0 | 0 | 0 | 0 | 0 | 0 | 1 | 0 | 0 | 95   | 1,75 | 31,02 | 0 |
| 1982 | 0 | 0 | 0 | 0 | 0 | 0 | 1 | 0 | 0 | 80,5 | 1,55 | 33,51 | 0 |
| 1983 | 0 | 1 | 0 | 0 | 0 | 1 | 4 | 1 | 2 | 71   | 1,68 | 25,16 | 0 |
| 1984 | 0 | 0 | 0 | 0 | 0 | 1 | 2 | 1 | 0 | 62   | 1,7  | 21,45 | 0 |
| 1985 | 0 | 0 | 0 | 0 | 0 | 0 | 1 | 0 | 0 | 69   | 1,7  | 23,88 | 0 |
| 1986 | 0 | 1 | 0 | 0 | 0 | 1 | 5 | 2 | 2 | 53   | 1,57 | 21,50 | 0 |
| 1987 | 0 | 0 | 0 | 0 | 0 | 0 | 1 | 0 | 0 | 75   | 1,68 | 26,57 | 0 |
| 1988 | 0 | 0 | 0 | 0 | 0 | 0 | 1 | 0 | 0 | 66   | 1,7  | 22,84 | 0 |
| 1989 | 0 | 0 | 0 | 0 | 0 | 0 | 1 | 0 | 0 | 73   | 1,65 | 26,81 | 0 |
| 1990 | 0 | 0 | 0 | 0 | 0 | 0 | 1 | 0 | 0 | 73   | 1,65 | 26,81 | 0 |
| 1991 | 0 | 0 | 0 | 0 | 0 | 0 | 2 | 0 | 1 | 78   | 1,63 | 29,36 | 0 |
| 1992 | 0 | 0 | 0 | 0 | 0 | 0 | 2 | 0 | 1 | 78   | 1,63 | 29,36 | 0 |
| 1993 | 0 | 0 | 0 | 0 | 0 | 0 | 1 | 0 | 0 | 62   | 1,66 | 22,5  | 0 |
| 1994 | 0 | 0 | 0 | 0 | 0 | 0 | 1 | 0 | 0 | 62   | 1,66 | 22,5  | 0 |
| 1995 | 0 | 0 | 0 | 0 | 0 | 0 | 1 | 0 | 0 | 83   | 1,65 | 30,49 | 0 |
| 1996 | 0 | 0 | 0 | 0 | 0 | 0 | 1 | 0 | 0 | 83   | 1,65 | 30,49 | 0 |
| 1997 | 0 | 0 | 0 | 0 | 0 | 0 | 1 | 0 | 0 | 64   | 1,68 | 22,68 | 0 |
| 1998 | 0 | 0 | 0 | 0 | 0 | 1 | 2 | 1 | 0 | 89   | 1,69 | 31,16 | 0 |
| 1999 | 0 | 0 | 0 | 0 | 0 | 0 | 1 | 0 | 0 | 58   | 1,56 | 23,83 | 0 |
| 2000 | 0 | 0 | 0 | 0 | 0 | 0 | 1 | 0 | 0 | 58   | 1,56 | 23,83 | 0 |
| 2001 | 0 | 0 | 0 | 0 | 0 | 0 | 1 | 0 | 0 | 66   | 1,77 | 21,07 | 0 |
| 2002 | 0 | 0 | 0 | 0 | 0 | 0 | 1 | 0 | 0 | 66   | 1,77 | 21,07 | 0 |
| 2003 | 0 | 0 | 0 | 0 | 0 | 0 | 1 | 0 | 0 | 106  | 1,68 | 37,56 | 0 |
| 2004 | 0 | 0 | 0 | 0 | 0 | 0 | 1 | 0 | 0 | 106  | 1,68 | 37,56 | 0 |
| 2005 | 0 | 0 | 0 | 0 | 0 | 0 | 1 | 0 | 0 | 55   | 1,71 | 18,81 | 0 |
| 2006 | 0 | 0 | 0 | 0 | 0 | 0 | 1 | 0 | 0 | 43   | 1,63 | 16,18 | 0 |
| 2007 | 0 | 1 | 0 | 0 | 0 | 1 | 2 | 1 | 0 | 85   | 1,68 | 30,12 | 0 |
| 2008 | 0 | 1 | 0 | 0 | 0 | 1 | 2 | 1 | 0 | 85   | 1,68 | 30,12 | 0 |
| 2009 | 0 | 0 | 0 | 0 | 0 | 0 | 1 | 0 | 0 | 47   | 1,58 | 18,83 | 0 |
| 2010 | 0 | 0 | 0 | 0 | 0 | 0 | 3 | 0 | 2 | 63   | 1,68 | 22,32 | 0 |
| 2011 | 0 | 0 | 0 | 0 | 0 | 0 | 1 | 0 | 0 | 49   | 1,62 | 18,67 | 0 |
| 2012 | 0 | 0 | 0 | 0 | 0 | 0 | 2 | 0 | 1 | 99   | 1,76 | 31,96 | 0 |

|      |   |   |   |   |   |   |   |   |   |   |     |      |       |   |
|------|---|---|---|---|---|---|---|---|---|---|-----|------|-------|---|
| 2013 | 0 | 0 | 0 | 0 | 0 | 0 | 1 | 2 | 1 | 0 | 69  | 1,56 | 28,35 | 0 |
| 2014 | 0 | 0 | 0 | 0 | 0 | 0 | 0 | 1 | 0 | 0 | 53  | 1,65 | 19,47 | 0 |
| 2015 | 0 | 0 | 0 | 0 | 0 | 0 | 0 | 1 | 0 | 0 | 95  | 1,74 | 31,38 | 0 |
| 2016 | 0 | 0 | 0 | 0 | 0 | 0 | 1 | 4 | 2 | 1 | 71  | 1,59 | 28,08 | 0 |
| 2017 | 0 | 0 | 0 | 0 | 0 | 0 | 0 | 1 | 0 | 0 | 72  | 1,59 | 28,48 | 0 |
| 2018 | 0 | 0 | 0 | 0 | 0 | 0 | 0 | 1 | 0 | 0 | 51  | 1,6  | 19,92 | 0 |
| 2019 | 0 | 0 | 0 | 0 | 0 | 0 | 0 | 1 | 0 | 0 | 70  | 1,68 | 24,8  | 0 |
| 2020 | 0 | 0 | 0 | 0 | 0 | 0 | 0 | 1 | 0 | 0 | 92  | 1,63 | 34,63 | 0 |
| 2021 | 0 | 1 | 0 | 0 | 0 | 0 | 1 | 2 | 1 | 0 | 61  | 1,64 | 22,68 | 0 |
| 2022 | 0 | 0 | 0 | 0 | 0 | 0 | 0 | 1 | 0 | 0 | 51  | 1,54 | 21,5  | 0 |
| 2023 | 0 | 0 | 0 | 0 | 0 | 0 | 0 | 1 | 0 | 0 | 45  | 1,57 | 18,26 | 0 |
| 2024 | 0 | 0 | 0 | 0 | 0 | 0 | 0 | 1 | 0 | 0 |     | 1,65 |       | 0 |
| 2025 | 0 | 1 | 0 | 0 | 0 | 0 | 1 | 3 | 1 | 1 | 70  | 1,64 | 26,03 | 0 |
| 2026 | 0 | 0 | 0 | 0 | 0 | 0 | 1 | 2 | 1 | 0 | 62  | 1,64 | 23,05 | 0 |
| 2027 | 0 | 0 | 0 | 0 | 0 | 0 | 0 | 1 | 0 | 0 | 90  | 1,65 | 33,06 | 0 |
| 2028 | 0 | 0 | 0 | 0 | 0 | 0 | 0 | 1 | 0 | 0 | 72  | 1,68 | 25,51 | 0 |
| 2029 | 0 | 0 | 0 | 0 | 0 | 0 | 1 | 2 | 1 | 0 | 66  | 1,65 | 24,24 | 0 |
| 2030 | 0 | 0 | 0 | 0 | 0 | 0 | 0 | 1 | 0 | 0 | 78  | 1,6  | 30,47 | 0 |
| 2031 | 0 | 0 | 0 | 0 | 0 | 0 | 1 | 2 | 1 | 0 | 82  | 1,7  | 28,37 | 0 |
| 2032 | 0 | 0 | 0 | 0 | 0 | 0 | 0 | 1 | 0 | 0 | 74  | 1,68 | 26,22 | 0 |
| 2033 | 0 | 0 | 0 | 0 | 0 | 0 | 0 | 2 | 0 | 1 | 65  | 1,55 | 27,06 | 0 |
| 2034 | 0 | 1 | 0 | 0 | 0 | 0 | 1 | 3 | 1 | 1 | 67  | 1,8  | 20,68 | 0 |
| 2035 | 0 | 0 | 0 | 0 | 0 | 0 | 1 | 5 | 1 | 3 | 90  | 1,58 | 36,05 | 0 |
| 2036 | 0 | 1 | 0 | 0 | 0 | 0 | 1 | 2 | 1 | 0 | 131 | 1,75 | 42,78 | 0 |
| 2037 | 0 | 1 | 0 | 0 | 0 | 0 | 1 | 2 | 1 | 0 | 131 | 1,75 | 42,78 | 0 |
| 2038 | 0 | 0 | 0 | 0 | 0 | 0 | 0 | 1 | 0 | 0 | 51  | 1,6  | 19,92 | 0 |
| 2039 | 0 | 0 | 0 | 0 | 0 | 0 | 0 | 1 | 0 | 0 | 66  | 1,68 | 23,38 | 0 |
| 2040 | 0 | 0 | 0 | 0 | 0 | 0 | 0 | 1 | 0 | 0 | 91  | 1,69 | 31,86 | 0 |
| 2041 | 0 | 1 | 0 | 0 | 0 | 0 | 0 | 1 | 0 | 0 | 101 | 1,73 | 33,75 | 0 |
| 2042 | 0 | 0 | 0 | 0 | 0 | 0 | 0 | 1 | 0 | 0 | 95  | 1,75 | 31,02 | 0 |
| 2043 | 0 | 0 | 0 | 0 | 0 | 0 | 1 | 2 | 1 | 0 | 83  | 1,76 | 26,79 | 0 |
| 2044 | 0 | 0 | 0 | 0 | 0 | 0 | 0 | 1 | 0 | 0 | 79  | 1,72 | 26,7  | 0 |
| 2045 | 0 | 0 | 0 | 0 | 0 | 0 | 0 | 1 | 0 | 0 | 52  | 1,64 | 19,33 | 0 |

|      |   |   |   |   |   |   |  |   |   |   |   |     |      |       |  |   |
|------|---|---|---|---|---|---|--|---|---|---|---|-----|------|-------|--|---|
| 2046 | 0 | 0 | 0 | 0 | 0 |   |  | 0 | 2 | 0 | 1 | 90  | 1,78 | 28,41 |  | 0 |
| 2047 | 0 | 0 | 0 | 0 | 0 |   |  | 0 | 1 | 0 | 0 | 87  | 1,72 | 29,41 |  | 0 |
| 2048 | 0 | 0 | 0 | 0 | 0 |   |  | 0 | 1 | 0 | 0 | 77  | 1,61 | 29,71 |  | 0 |
| 2049 | 0 | 0 | 0 | 0 | 0 |   |  | 0 | 2 | 0 | 1 | 90  | 1,78 | 28,41 |  | 0 |
| 2050 | 0 | 0 | 0 | 0 | 0 |   |  | 0 | 1 | 0 | 0 | 115 | 1,86 | 33,24 |  | 0 |
| 2051 | 0 | 0 | 0 | 0 | 0 |   |  | 0 | 1 | 0 | 0 | 112 | 1,75 | 36,57 |  | 0 |
| 2052 | 0 | 0 | 0 | 0 | 0 |   |  | 0 | 1 | 0 | 0 | 72  | 1,7  | 24,91 |  | 0 |
| 2053 | 0 | 0 | 0 | 0 | 0 |   |  | 0 | 2 | 0 | 1 | 92  | 1,68 | 32,6  |  | 0 |
| 2054 | 0 | 0 | 0 | 0 | 0 |   |  | 0 | 2 | 0 | 1 | 92  | 1,68 | 32,6  |  | 0 |
| 2055 | 0 | 0 | 0 | 0 | 0 |   |  | 0 | 3 | 0 | 2 |     | 1,57 |       |  | 0 |
| 2056 | 0 | 0 | 0 | 0 | 0 |   |  | 1 | 2 | 1 | 0 | 143 | 1,67 | 51,27 |  | 0 |
| 2057 | 0 | 0 | 0 | 0 | 0 |   |  | 1 | 2 | 1 | 0 | 88  | 1,56 | 36,16 |  | 0 |
| 2058 | 0 | 1 | 0 | 0 | 0 | 1 |  | 0 | 2 | 0 | 1 | 56  | 1,65 | 20,57 |  | 0 |
| 2059 | 0 | 1 | 0 | 0 | 0 |   |  | 1 | 3 | 2 | 0 | 66  | 1,67 | 23,67 |  | 0 |
| 2060 | 0 | 1 | 0 | 0 | 0 |   |  | 1 | 3 | 2 | 0 | 66  | 1,67 | 23,67 |  | 0 |
| 2061 | 0 | 1 | 0 | 0 | 0 |   |  | 1 | 3 | 2 | 0 | 66  | 1,67 | 23,67 |  | 0 |
| 2062 | 0 | 0 | 0 | 0 | 0 |   |  | 1 | 2 | 1 | 0 | 65  | 1,7  | 22,49 |  | 1 |
| 2063 | 0 | 0 | 0 | 0 | 0 |   |  | 1 | 2 | 1 | 0 | 70  | 1,84 | 20,68 |  | 0 |
| 2064 | 0 | 0 | 0 | 0 | 0 |   |  | 1 | 4 | 3 | 0 | 65  | 1,65 | 23,88 |  | 0 |
| 2065 | 0 | 0 | 0 | 0 | 0 |   |  | 0 | 1 | 0 | 0 | 65  | 1,68 | 23,03 |  | 0 |
| 2066 | 0 | 0 | 0 | 0 | 0 |   |  | 1 | 3 | 1 | 1 | 62  | 1,58 | 24,84 |  | 0 |
| 2067 | 0 | 0 | 0 | 0 | 0 |   |  | 0 | 1 | 0 | 0 | 68  | 1,56 | 27,94 |  | 0 |
| 2068 | 0 | 0 | 0 | 0 | 0 |   |  | 0 | 1 | 0 | 0 | 82  | 1,72 | 27,72 |  | 0 |
| 2069 | 0 | 0 | 0 | 0 | 0 |   |  | 0 | 1 | 0 | 0 | 58  | 1,6  | 22,66 |  | 0 |
| 2070 | 0 | 0 | 1 | 0 | 0 |   |  | 1 | 3 | 2 | 0 | 84  | 1,6  | 32,81 |  | 0 |
| 2071 | 0 | 1 | 0 | 1 | 0 |   |  | 1 | 2 | 1 | 0 | 62  | 1,51 | 27,19 |  | 0 |
| 2072 | 0 | 0 | 0 | 0 | 0 |   |  | 1 | 2 | 1 | 0 | 58  | 1,69 | 20,31 |  | 0 |
| 2073 | 0 | 0 | 0 | 0 | 0 |   |  | 1 | 2 | 1 | 0 | 58  | 1,69 | 20,31 |  | 0 |
| 2074 | 0 | 0 | 0 | 0 | 0 |   |  | 0 | 1 | 0 | 0 | 86  | 1,81 | 26,25 |  | 0 |
| 2075 | 0 | 1 | 1 | 0 | 0 |   |  | 1 | 2 | 1 | 0 | 92  | 1,7  | 31,83 |  | 0 |
| 2076 | 0 | 0 | 1 | 0 | 0 |   |  | 1 | 2 | 1 | 0 | 80  | 1,63 | 30,11 |  | 0 |
| 2077 | 0 | 0 | 1 | 1 | 0 |   |  | 1 | 6 | 2 | 3 | 55  | 1,43 | 26,90 |  | 0 |
| 2078 | 0 | 0 | 1 | 0 | 0 |   |  | 0 | 1 | 0 | 0 | 65  | 1,68 | 23,03 |  | 0 |

|      |                 |   |   |   |   |   |  |   |   |   |   |      |      |       |   |
|------|-----------------|---|---|---|---|---|--|---|---|---|---|------|------|-------|---|
| 2079 | 0               | 0 | 1 | 0 | 0 |   |  | 1 | 4 | 2 | 1 | 84   | 1,61 | 32,41 | 0 |
| 2080 | 0               | 0 | 1 | 0 | 0 |   |  | 1 | 3 | 2 | 0 | 94   | 1,64 | 34,95 | 0 |
| 2081 | 0               | 0 | 1 | 0 | 0 |   |  | 1 | 3 | 1 | 1 | 100  | 1,7  | 34,6  | 0 |
| 2082 | 0               | 0 | 1 | 0 | 0 |   |  | 0 | 1 | 0 | 0 | 68   | 1,78 | 21,46 | 0 |
| 2083 | 0               | 1 | 0 | 0 | 1 | 1 |  | 1 | 2 | 1 | 0 | 62   | 1,63 | 23,34 | 0 |
| 2084 | 0               | 1 | 0 | 0 | 1 | 1 |  | 1 | 2 | 1 | 0 | 62   | 1,63 | 23,34 | 0 |
| 2085 | 0               | 1 | 0 | 0 | 1 | 1 |  | 1 | 2 | 1 | 0 | 62   | 1,63 | 23,34 | 0 |
| 2086 | 2               | 0 | 0 | 0 | 0 | 1 |  | 0 | 1 | 0 | 0 | 87   | 1,83 | 25,98 | 0 |
| 2087 | 2               | 0 | 0 | 1 | 1 | 1 |  | 1 | 2 | 1 | 0 | 57   | 1,68 | 20,2  | 1 |
| 2088 | 2               | 0 | 0 | 1 | 1 | 1 |  | 1 | 2 | 1 | 0 | 57   | 1,68 | 20,2  | 1 |
| 2089 | 2               | 0 | 0 | 1 | 1 | 1 |  | 1 | 2 | 1 | 0 | 57   | 1,68 | 20,2  | 1 |
| 2090 | 2               | 0 | 0 | 0 | 0 | 1 |  | 0 | 1 | 0 | 0 | 58   | 1,62 | 22,1  | 0 |
| 2091 | 2               | 0 | 0 | 0 | 0 | 1 |  | 0 | 1 | 0 | 0 | 58   | 1,62 | 22,1  | 0 |
| 2092 | 0               | 0 | 0 | 0 | 1 | 1 |  | 0 | 1 | 0 | 0 | 54   | 1,64 | 20,08 | 0 |
| 2093 | 0               | 0 | 0 | 0 | 0 |   |  | 1 | 3 | 2 | 0 | 55   | 1,71 | 18,81 | 0 |
| 2094 | 0               | 0 | 0 | 0 | 0 |   |  | 1 | 3 | 2 | 0 | 55   | 1,71 | 18,81 | 0 |
| 2095 | 0               | 0 | 0 | 0 | 0 |   |  | 1 | 3 | 2 | 0 | 55   | 1,71 | 18,81 | 0 |
| 2096 | 0               | 0 | 0 | 0 | 0 | 1 |  | 0 | 1 | 0 | 0 | 110  | 1,72 | 37,18 | 0 |
| 2097 | 0               | 0 | 0 | 0 | 0 | 1 |  | 0 | 1 | 0 | 0 | 110  | 1,72 | 37,18 | 0 |
| 2098 | 2               | 1 | 0 | 0 | 0 | 1 |  | 1 | 2 | 1 | 0 | 62   | 1,62 | 23,62 | 0 |
| 2099 | 2               | 1 | 0 | 0 | 0 | 1 |  | 1 | 2 | 1 | 0 | 62   | 1,62 | 23,62 | 0 |
| 2100 | 1               | 0 | 0 | 0 | 0 | 1 |  | 1 | 3 | 1 | 1 | 84   | 1,68 | 29,76 | 0 |
| 2101 | 1               | 0 | 0 | 0 | 0 | 1 |  | 1 | 3 | 1 | 1 | 84   | 1,68 | 29,76 | 0 |
| 2102 | 1               | 0 | 0 | 0 | 0 | 1 |  | 1 | 3 | 1 | 1 | 84   | 1,68 | 29,76 | 0 |
| 2103 | 2               | 0 | 0 | 0 | 1 | 1 |  | 0 | 1 | 0 | 0 | 62   | 1,5  | 27,56 | 0 |
| 2104 | curretage , mka | 1 | 0 | 0 | 0 | 1 |  | 0 | 2 | 0 | 1 | 66   | 1,68 | 23,38 | 0 |
| 2105 | 0               | 1 | 0 | 0 | 0 | 1 |  | 1 | 2 | 1 | 0 | 64   | 1,71 | 21,89 | 0 |
| 2106 | 1               | 1 | 0 | 0 | 1 | 1 |  | 1 | 3 | 1 | 1 | 64   | 1,66 | 23,23 | 0 |
| 2107 | 1               | 1 | 0 | 0 | 1 | 1 |  | 1 | 3 | 1 | 1 | 64   | 1,66 | 23,23 | 0 |
| 2108 | 1               | 1 | 0 | 0 | 1 | 1 |  | 1 | 3 | 1 | 1 | 64   | 1,66 | 23,23 | 0 |
| 2109 | 0               | 1 | 0 | 0 | 0 | 1 |  | 1 | 2 | 1 | 0 | 84   | 1,69 | 29,41 | 0 |
| 2110 | 2               | 0 | 1 | 0 | 1 | 1 |  | 0 | 1 | 0 | 0 | 70,5 | 1,76 | 22,76 | 0 |
| 2111 | 0               | 0 | 0 | 0 | 0 | 1 |  | 0 | 1 | 0 | 0 | 68   | 1,69 | 23,81 | 0 |



|      |   |   |   |   |   |   |   |   |   |   |       |      |       |   |
|------|---|---|---|---|---|---|---|---|---|---|-------|------|-------|---|
| 2112 | 0 | 0 | 0 | 0 | 0 | 1 | 0 | 1 | 0 | 0 | 68    | 1,69 | 23,81 | 0 |
| 2113 | 1 | 1 | 1 | 0 | 0 | 6 | 1 | 2 | 1 | 0 | 79    | 1,5  | 35,11 | 0 |
| 2114 | 1 | 1 | 1 | 0 | 0 | 6 | 1 | 2 | 1 | 0 | 79    | 1,5  | 35,11 | 0 |
| 2115 | 1 | 1 | 1 | 0 | 0 | 6 | 1 | 2 | 1 | 0 | 79    | 1,5  | 35,11 | 0 |
| 2116 | 1 | 0 | 0 | 0 | 1 | 6 | 0 | 1 | 0 | 0 | 55    | 1,55 | 22,89 | 0 |
| 2117 | 0 | 0 | 0 | 0 | 1 | 6 | 0 | 1 | 0 | 0 | 52    | 1,63 | 19,57 | 0 |
| 2118 | 0 | 0 | 0 | 0 | 0 | 6 | 0 | 1 | 0 | 0 | 52    | 1,63 | 19,57 | 0 |
| 2119 | 1 | 0 | 0 | 0 | 0 | 1 | 0 | 2 | 0 | 1 | 63    | 1,59 | 24,92 | 0 |
| 2120 | 1 | 0 | 0 | 0 | 0 | 1 | 0 | 2 | 0 | 1 | 63    | 1,59 | 24,92 | 0 |
| 2121 | 2 | 1 | 1 | 0 | 0 | 1 | 1 | 2 | 1 | 0 | 113   | 1,67 | 40,52 | 0 |
| 2122 | 2 | 1 | 1 | 0 | 0 | 1 | 1 | 2 | 1 | 0 | 113   | 1,67 | 40,52 | 0 |
| 2123 | 1 | 0 | 1 | 0 | 0 | 1 | 0 | 1 | 0 | 0 | 60    | 1,67 | 21,51 | 0 |
| 2124 | 1 | 0 | 1 | 0 | 0 | 1 | 0 | 1 | 0 | 0 | 60    | 1,67 | 21,51 | 0 |
| 2125 | 1 | 0 | 1 | 0 | 0 | 1 | 0 | 1 | 0 | 0 | 60    | 1,67 | 21,51 | 0 |
| 2126 | 1 | 0 | 1 | 0 | 0 | 3 | 0 | 1 | 0 | 0 | 60    | 1,54 | 25,3  | 0 |
| 2127 | 1 | 0 | 1 | 0 | 0 | 3 | 0 | 1 | 0 | 0 | 60    | 1,54 | 25,3  | 0 |
| 2128 | 0 | 0 | 0 | 0 | 1 | 1 | 0 | 1 | 0 | 0 | 54    | 1,6  | 21,09 | 0 |
| 2129 | 0 | 0 | 0 | 0 | 0 | 1 | 0 | 1 | 0 | 0 | 69    | 1,63 | 25,97 | 0 |
| 2130 | 0 | 0 | 0 | 0 | 0 | 1 | 0 | 1 | 0 | 0 | 69    | 1,63 | 25,97 | 0 |
| 2131 | 2 | 0 | 0 | 0 | 1 | 1 | 0 | 1 | 0 | 0 | 66    | 1,48 | 30,13 | 0 |
| 2132 | 2 | 0 | 0 | 0 | 1 | 1 | 0 | 1 | 0 | 0 | 66    | 1,48 | 30,13 | 0 |
| 2133 | 1 | 1 | 0 | 0 | 1 | 1 | 1 | 3 | 1 | 1 | 68    | 1,7  | 23,53 | 0 |
| 2134 | 1 | 1 | 0 | 0 | 1 | 1 | 1 | 3 | 1 | 1 | 68    | 1,7  | 23,53 | 0 |
| 2135 | 1 | 1 | 0 | 0 | 1 | 1 | 1 | 3 | 1 | 1 | 68    | 1,7  | 23,53 | 0 |
| 2136 | 1 | 0 | 0 | 0 | 1 | 1 | 0 | 1 | 0 | 0 |       | 1,6  |       | 0 |
| 2137 | 2 | 0 | 0 | 0 | 0 | 1 | 0 | 1 | 0 | 0 | 56    | 1,61 | 21,6  | 0 |
| 2138 | 2 | 0 | 0 | 0 | 0 | 1 | 0 | 1 | 0 | 0 | 56    | 1,61 | 21,6  | 0 |
| 2139 | 0 | 0 | 0 | 0 | 0 | 1 | 0 | 1 | 0 | 0 | 63    | 1,67 | 22,59 | 0 |
| 2140 | 0 | 0 | 0 | 0 | 0 | 1 | 0 | 1 | 0 | 0 | 63    | 1,67 | 22,59 | 0 |
| 2141 | 0 | 1 | 0 | 0 | 0 | 3 | 1 | 2 | 1 | 0 | 82    | 1,67 | 29,4  | 0 |
| 2142 | 0 | 1 | 0 | 0 | 0 | 3 | 1 | 2 | 1 | 0 | 82    | 1,67 | 29,4  | 0 |
| 2143 | 2 | 0 | 1 | 1 | 1 | 1 | 0 | 1 | 0 | 0 | 109,5 | 1,78 | 34,56 | 0 |
| 2144 | 1 | 1 | 0 | 0 | 0 | 1 | 0 | 1 | 0 | 0 | 67    | 1,68 | 23,74 | 0 |

|      |   |   |   |   |   |   |  |   |   |   |   |      |      |       |   |
|------|---|---|---|---|---|---|--|---|---|---|---|------|------|-------|---|
| 2145 | 1 | 1 | 0 | 0 | 0 | 1 |  | 0 | 1 | 0 | 0 | 67   | 1,68 | 23,74 | 0 |
| 2146 | 0 | 0 | 0 | 0 | 0 |   |  | 0 | 2 | 0 | 1 | 56   | 1,58 | 22,43 | 0 |
| 2147 | 0 | 0 | 0 | 0 | 0 |   |  | 0 | 1 | 0 | 0 | 57   | 1,54 | 24,03 | 0 |
| 2148 | 0 | 0 | 0 | 0 | 0 |   |  | 1 | 6 | 2 | 3 | 55   | 1,43 | 26,90 | 1 |
| 2149 | 0 | 0 | 0 | 0 | 0 |   |  | 1 | 9 | 3 | 5 | 83   | 1,56 | 34,11 | 0 |
| 2150 | 0 | 0 | 0 | 0 | 0 |   |  | 1 | 5 | 1 | 3 | 60   | 1,6  | 23,44 | 0 |
| 2151 | 0 | 0 | 0 | 0 | 0 |   |  | 0 | 1 | 0 | 0 | 56,7 | 1,58 | 22,71 | 0 |
| 2152 | 0 | 0 | 0 | 0 | 0 |   |  | 0 | 1 | 0 | 0 | 68   | 1,66 | 24,68 | 0 |
| 2153 | 0 | 0 | 0 | 0 | 0 |   |  | 0 | 1 | 0 | 0 | 54   | 1,64 | 20,08 | 0 |
| 2154 | 0 | 0 | 0 | 0 | 0 |   |  | 1 | 2 | 1 | 0 | 50   | 1,65 | 18,37 | 0 |
| 2155 | 0 | 0 | 0 | 0 | 0 |   |  | 0 | 1 | 0 | 0 | 54   | 1,63 | 20,32 | 0 |
| 2156 | 0 | 0 | 0 | 0 | 0 |   |  | 0 | 1 | 0 | 0 | 78   | 1,7  | 26,99 | 0 |
| 2157 | 0 | 0 | 0 | 0 | 0 |   |  | 0 | 1 | 0 | 0 | 65   | 1,68 | 23,03 | 0 |
| 2158 | 0 | 1 | 0 | 0 | 0 |   |  | 0 | 1 | 0 | 0 |      | 1,65 |       | 0 |
| 2159 | 0 | 0 | 0 | 0 | 0 |   |  | 0 | 1 | 0 | 0 | 105  | 1,5  | 46,67 | 0 |
| 2160 | 0 | 0 | 0 | 0 | 0 |   |  | 0 | 1 | 0 | 0 | 64   | 1,54 | 26,99 | 0 |
| 2161 | 0 | 0 | 0 | 0 | 0 |   |  | 0 | 1 | 0 | 0 | 66   | 1,69 | 23,11 | 0 |
| 2162 | 0 | 0 | 0 | 0 | 0 |   |  | 0 | 1 | 0 | 0 | 77   | 1,6  | 30,08 | 0 |
| 2163 | 0 | 0 | 0 | 0 | 0 |   |  | 1 | 3 | 2 | 0 | 90   | 1,74 | 29,73 | 0 |
| 2164 | 0 | 0 | 0 | 0 | 0 |   |  | 0 | 1 | 0 | 0 | 63   | 1,7  | 21,80 | 0 |
| 2165 | 0 | 0 | 0 | 0 | 0 |   |  | 1 | 2 | 1 | 0 | 50   | 1,67 | 17,93 | 0 |
| 2166 | 0 | 0 | 0 | 0 | 0 |   |  | 1 | 2 | 1 | 0 | 75   | 1,6  | 29,30 | 0 |
| 2167 | 0 | 0 | 0 | 0 | 0 |   |  | 0 | 1 | 0 | 0 | 90   | 1,8  | 27,78 | 0 |
| 2168 | 0 | 0 | 0 | 0 | 0 |   |  | 0 | 2 | 0 | 1 |      | 1,7  |       | 0 |
| 2169 | 0 | 0 | 0 | 0 | 0 |   |  | 1 | 3 | 2 | 0 | 68   | 1,7  | 23,53 | 0 |
| 2170 | 0 | 0 | 0 | 0 | 0 |   |  | 0 | 1 | 0 | 0 | 58   | 1,55 | 24,14 | 0 |
| 2171 | 0 | 0 | 0 | 0 | 0 |   |  | 0 | 1 | 0 | 0 | 65   | 1,67 | 23,31 | 0 |
| 2172 | 0 | 0 | 0 | 0 | 0 |   |  | 0 | 1 | 0 | 0 | 78   | 1,67 | 27,97 | 0 |
| 2173 | 0 | 0 | 0 | 0 | 0 |   |  | 0 | 1 | 0 | 0 | 61   | 1,67 | 21,87 | 0 |
| 2174 | 0 | 0 | 0 | 0 | 0 |   |  | 0 | 1 | 0 | 0 |      | 1,72 |       | 0 |
| 2175 | 0 | 0 | 0 | 0 | 0 |   |  | 1 | 3 | 2 | 0 | 100  | 1,73 | 33,41 | 0 |
| 2176 | 0 | 0 | 0 | 0 | 0 |   |  | 0 | 1 | 0 | 0 | 70,5 | 1,76 | 22,76 | 0 |
| 2177 | 0 | 1 | 0 | 0 | 0 |   |  | 1 | 2 | 1 | 0 | 86   | 1,72 | 29,07 | 0 |

|      |   |   |   |   |   |   |   |   |   |      |      |       |   |
|------|---|---|---|---|---|---|---|---|---|------|------|-------|---|
| 2178 | 0 | 0 | 0 | 0 | 0 | 0 | 2 | 0 | 1 | 92   | 1,74 | 30,39 | 0 |
| 2179 | 0 | 0 | 0 | 0 | 0 | 0 | 1 | 0 | 0 | 91   | 1,68 | 32,24 | 0 |
| 2180 | 0 | 0 | 0 | 0 | 0 | 0 | 1 | 0 | 0 | 73,3 | 1,7  | 25,36 | 0 |
| 2181 | 0 | 0 | 0 | 0 | 0 | 0 | 1 | 0 | 0 | 58   | 1,7  | 20,07 | 0 |
| 2182 | 0 | 0 | 0 | 0 | 0 | 0 | 1 | 0 | 0 | 58   | 1,7  | 20,07 | 0 |
| 2183 | 0 | 0 | 0 | 0 | 1 | 1 | 2 | 1 | 0 | 53   | 1,63 | 19,95 | 0 |
| 2184 | 0 | 0 | 0 | 0 | 1 | 1 | 2 | 1 | 0 | 53   | 1,63 | 19,95 | 0 |
| 2185 | 0 | 1 | 0 | 0 | 0 | 1 | 2 | 1 | 0 | 57   | 1,72 | 19,27 | 0 |
| 2186 | 0 | 1 | 0 | 0 | 0 | 1 | 2 | 1 | 0 | 57   | 1,72 | 19,27 | 0 |
| 2187 | 0 | 0 | 0 | 0 | 0 | 0 | 1 | 0 | 0 | 80   | 1,75 | 26,12 | 0 |
| 2188 | 0 | 0 | 0 | 0 | 0 | 0 | 1 | 0 | 0 | 80   | 1,75 | 26,12 | 0 |
| 2189 | 0 | 0 | 0 | 0 | 0 | 0 | 1 | 0 | 0 | 93   | 1,69 | 32,56 | 0 |
| 2190 | 0 | 0 | 0 | 0 | 0 | 0 | 1 | 0 | 0 | 93   | 1,69 | 32,56 | 0 |
| 2191 | 0 | 0 | 0 | 0 | 0 | 1 | 3 | 1 | 1 | 82   | 1,68 | 29,05 | 0 |
| 2192 | 0 | 0 | 0 | 0 | 0 | 1 | 3 | 1 | 1 | 82   | 1,68 | 29,05 | 0 |
| 2193 | 0 | 0 | 0 | 0 | 0 | 1 | 4 | 3 | 0 | 77   | 1,7  | 26,64 | 0 |
| 2194 | 0 | 0 | 0 | 0 | 0 | 1 | 4 | 3 | 0 | 77   | 1,7  | 26,64 | 0 |
| 2195 | 0 | 1 | 0 | 0 | 0 | 1 | 3 | 1 | 1 | 107  | 1,64 | 39,78 | 0 |
| 2196 | 0 | 0 | 0 | 0 | 0 | 0 | 1 | 0 | 0 | 83   | 1,7  | 28,72 | 0 |
| 2197 | 0 | 0 | 0 | 0 | 0 | 0 | 1 | 0 | 0 | 97   | 1,6  | 37,89 | 0 |
| 2198 | 0 | 0 | 0 | 0 | 0 | 0 | 1 | 0 | 0 | 97   | 1,6  | 37,89 | 0 |
| 2199 | 0 | 0 | 0 | 0 | 0 | 0 | 1 | 0 | 0 | 60   | 1,7  | 20,76 | 0 |
| 2200 | 0 | 0 | 0 | 0 | 0 | 0 | 1 | 0 | 0 | 60   | 1,7  | 20,76 | 0 |
| 2201 | 0 | 0 | 0 | 0 | 0 | 1 | 4 | 2 | 1 |      | 1,55 |       | 0 |
| 2202 | 0 | 1 | 0 | 0 | 0 | 1 | 3 | 1 | 1 | 66   | 1,56 | 27,12 | 1 |
| 2203 | 0 | 1 | 0 | 0 | 0 | 1 | 3 | 1 | 1 | 66   | 1,56 | 27,12 | 1 |
| 2204 | 0 | 0 | 0 | 0 | 0 | 1 | 2 | 1 | 0 | 70   | 1,73 | 23,39 | 0 |
| 2205 | 0 | 0 | 0 | 0 | 0 | 0 | 1 | 0 | 0 | 68   | 1,65 | 24,98 | 0 |
| 2206 | 0 | 0 | 0 | 0 | 0 | 1 | 2 | 1 | 0 | 62   | 1,58 | 24,84 | 0 |
| 2207 | 0 | 0 | 1 | 0 | 0 | 1 | 4 | 2 | 1 | 82   | 1,65 | 30,12 | 0 |
| 2208 | 0 | 1 | 0 | 0 | 0 | 1 | 2 | 1 | 0 | 78   | 1,78 | 24,62 | 0 |
| 2209 | 0 | 1 | 0 | 0 | 0 | 1 | 2 | 1 | 0 | 78   | 1,78 | 24,62 | 0 |
| 2210 | 0 | 0 | 1 | 0 | 0 | 0 | 2 | 0 | 1 | 92   | 1,7  | 31,83 | 0 |

|      |   |   |   |   |   |   |   |   |   |   |    |      |       |   |
|------|---|---|---|---|---|---|---|---|---|---|----|------|-------|---|
| 2211 | 1 | 0 | 0 | 0 | 1 | 1 | 0 | 2 | 0 | 1 | 72 | 1,7  | 24,91 | 0 |
| 2212 | 1 | 0 | 0 | 0 | 0 |   | 0 | 1 | 0 | 0 | 58 | 1,55 | 24,14 | 0 |
| 2213 | 1 | 0 | 0 | 0 | 0 |   | 0 | 1 | 0 | 0 | 58 | 1,55 | 24,14 | 0 |
| 2214 | 1 | 0 | 0 | 0 | 0 |   | 0 | 1 | 0 | 0 | 58 | 1,55 | 24,14 | 0 |
| 2215 | 1 | 1 | 0 | 0 | 1 | 1 | 1 | 6 | 4 | 1 | 69 | 1,58 | 27,64 | 0 |
| 2216 | 1 | 1 | 0 | 0 | 1 | 1 | 1 | 6 | 4 | 1 | 69 | 1,58 | 27,64 | 0 |
| 2217 | 1 | 0 | 1 | 0 | 1 | 1 | 0 | 1 | 0 | 0 | 83 | 1,63 | 31,24 | 0 |
| 2218 | 1 | 0 | 1 | 0 | 1 | 1 | 0 | 1 | 0 | 0 | 83 | 1,63 | 31,24 | 0 |
| 2219 | 1 | 0 | 1 | 0 | 1 | 1 | 0 | 1 | 0 | 0 | 83 | 1,63 | 31,24 | 0 |
| 2220 | 1 | 0 | 0 | 0 | 0 | 3 | 0 | 1 | 0 | 0 | 65 | 1,69 | 22,76 | 0 |
| 2221 | 1 | 0 | 0 | 0 | 0 | 3 | 0 | 1 | 0 | 0 | 65 | 1,69 | 22,76 | 0 |
| 2222 | 1 | 0 | 0 | 0 | 1 | 1 | 1 | 2 | 1 | 0 | 90 | 1,81 | 27,47 | 0 |
| 2223 | 1 | 0 | 0 | 0 | 0 | 1 | 0 | 3 | 0 | 2 | 50 | 1,67 | 17,93 | 0 |
| 2224 | 1 | 0 | 0 | 0 | 0 | 1 | 0 | 3 | 0 | 2 | 50 | 1,67 | 17,93 | 0 |
| 2225 | 1 | 0 | 0 | 0 | 0 | 1 | 0 | 3 | 0 | 2 | 50 | 1,67 | 17,93 | 0 |
| 2226 | 0 | 1 | 0 | 0 | 0 | 1 | 0 | 1 | 0 | 0 | 60 | 1,6  | 23,44 | 0 |
| 2227 | 0 | 1 | 0 | 0 | 0 | 1 | 0 | 1 | 0 | 0 | 60 | 1,6  | 23,44 | 0 |
| 2228 | 0 | 1 | 0 | 0 | 0 | 1 | 0 | 1 | 0 | 0 | 60 | 1,6  | 23,44 | 0 |
| 2229 | 0 | 1 | 0 | 0 | 0 |   | 0 | 1 | 0 | 0 | 65 | 1,57 | 26,37 | 0 |
| 2230 | 0 | 1 | 0 | 0 | 0 |   | 0 | 1 | 0 | 0 | 65 | 1,57 | 26,37 | 0 |
| 2231 | 0 | 0 | 0 | 0 | 0 | 3 | 0 | 1 | 0 | 0 | 80 | 1,65 | 29,38 | 0 |
| 2232 | 0 | 0 | 0 | 0 | 0 | 3 | 0 | 1 | 0 | 0 | 80 | 1,65 | 29,38 | 0 |
| 2233 | 0 | 0 | 0 | 0 | 0 | 1 | 1 | 2 | 1 | 0 | 62 | 1,67 | 22,23 | 0 |
| 2234 | 1 | 0 | 0 | 0 | 0 | 2 | 1 | 2 | 1 | 0 | 63 | 1,68 | 22,32 | 0 |
| 2235 | 1 | 0 | 0 | 0 | 0 | 2 | 1 | 2 | 1 | 0 | 63 | 1,68 | 22,32 | 0 |
| 2236 | 0 | 0 | 0 | 0 | 0 | 1 | 0 | 1 | 0 | 0 | 96 | 1,73 | 32,08 | 0 |
| 2237 | 0 | 0 | 0 | 0 | 0 | 1 | 0 | 1 | 0 | 0 | 96 | 1,73 | 32,08 | 0 |
| 2238 | 0 | 0 | 0 | 1 | 0 | 1 | 0 | 1 | 0 | 0 | 82 | 1,7  | 28,37 | 0 |
| 2239 | 0 | 0 | 0 | 1 | 0 | 1 | 0 | 1 | 0 | 0 | 82 | 1,7  | 28,37 | 0 |
| 2240 | 0 | 0 | 0 | 1 | 0 | 1 | 0 | 1 | 0 | 0 | 82 | 1,7  | 28,37 | 0 |
| 2241 | 2 | 1 | 1 | 0 | 1 | 1 | 1 | 5 | 2 | 2 | 90 | 1,64 | 33,46 | 0 |
| 2242 | 2 | 1 | 1 | 0 | 1 | 1 | 1 | 5 | 2 | 2 | 90 | 1,64 | 33,46 | 0 |
| 2243 | 1 | 0 | 1 | 0 | 0 | 1 | 1 | 4 | 1 | 2 | 98 | 1,6  | 38,28 | 0 |

|      |   |   |   |   |   |   |   |   |   |   |      |      |       |   |
|------|---|---|---|---|---|---|---|---|---|---|------|------|-------|---|
| 2244 | 1 | 0 | 1 | 0 | 0 | 1 | 0 | 1 | 0 | 0 | 79   | 1,73 | 26,4  | 0 |
| 2245 | 1 | 0 | 1 | 0 | 0 | 1 | 0 | 1 | 0 | 0 | 79   | 1,73 | 26,4  | 0 |
| 2246 | 1 | 0 | 1 | 0 | 1 | 2 | 1 | 2 | 1 | 0 | 90   | 1,6  | 35,16 | 0 |
| 2247 | 1 | 0 | 1 | 0 | 1 | 2 | 1 | 2 | 1 | 0 | 90   | 1,6  | 35,16 | 0 |
| 2248 | 1 | 0 | 1 | 0 | 1 | 2 | 1 | 2 | 1 | 0 | 90   | 1,6  | 35,16 | 0 |
| 2249 | 1 | 1 | 1 | 1 | 0 | 2 | 1 | 4 | 2 | 1 | 60   | 1,77 | 19,15 | 1 |
| 2250 | 1 | 0 | 0 | 1 | 1 | 3 | 0 | 1 | 0 | 0 | 104  | 1,6  | 40,63 | 0 |
| 2251 | 0 | 1 | 0 | 0 | 0 | 1 | 1 | 3 | 1 | 1 | 61   | 1,6  | 23,83 | 0 |
| 2252 | 1 | 1 | 0 | 0 | 0 | 1 | 1 | 3 | 2 | 0 | 60   | 1,7  | 20,76 | 0 |
| 2253 | 1 | 0 | 0 | 0 | 0 |   | 0 | 1 | 0 | 0 | 99   | 1,71 | 33,86 | 0 |
| 2254 | 0 | 1 | 0 | 0 | 0 | 1 | 1 | 2 | 1 | 0 | 62   | 1,6  | 24,22 | 0 |
| 2255 | 0 | 1 | 0 | 0 | 0 | 1 | 1 | 2 | 1 | 0 | 62   | 1,6  | 24,22 | 0 |
| 2256 | 0 | 1 | 0 | 0 | 0 | 1 | 1 | 2 | 1 | 0 | 62   | 1,6  | 24,22 | 0 |
| 2257 | 1 | 1 | 0 | 0 | 0 | 1 | 1 | 3 | 2 | 0 | 73,8 | 1,65 | 27,11 | 0 |
| 2258 | 0 | 1 | 0 | 0 | 0 |   | 1 | 3 | 2 | 0 | 60   | 1,7  | 20,76 | 0 |
| 2259 | 0 | 1 | 0 | 0 | 0 |   | 1 | 3 | 2 | 0 | 68   | 1,72 | 22,99 | 0 |
| 2260 | 1 | 0 | 0 | 0 | 0 |   | 0 | 1 | 0 | 0 |      | 1,58 |       | 0 |
| 2261 | 0 | 0 | 1 | 0 | 0 |   | 0 | 1 | 0 | 0 | 68   | 1,72 | 22,99 | 0 |
| 2262 | 0 | 0 | 1 | 0 | 0 |   | 0 | 1 | 0 | 0 | 68   | 1,72 | 22,99 | 0 |
| 2263 | 0 | 0 | 0 | 0 | 0 |   | 0 | 1 | 0 | 0 | 58   | 1,71 | 19,84 | 0 |
| 2264 | 0 | 0 | 0 | 0 | 0 |   | 0 | 1 | 0 | 0 | 58   | 1,71 | 19,84 | 0 |
| 2265 | 0 | 1 | 0 | 0 | 0 |   | 0 | 1 | 0 | 0 | 69   | 1,6  | 26,95 | 0 |
| 2266 | 0 | 0 | 0 | 0 | 0 |   | 1 | 2 | 1 | 0 | 66   | 1,65 | 24,24 | 0 |
| 2267 | 0 | 0 | 0 | 0 | 0 |   | 1 | 3 | 1 | 1 | 63   | 1,7  | 21,8  | 0 |
| 2268 | 0 | 0 | 0 | 0 | 0 |   | 1 | 3 | 1 | 1 | 71   | 1,75 | 23,18 | 0 |
| 2269 | 0 | 0 | 0 | 0 | 0 |   | 0 | 1 | 0 | 1 | 80   | 1,67 | 28,69 | 0 |
| 2270 | 0 | 0 | 0 | 0 | 0 |   | 1 | 3 | 2 | 0 | 47   | 1,56 | 19,31 | 0 |
| 2271 | 0 | 0 | 0 | 0 | 0 |   | 0 | 1 | 0 | 0 | 99   | 1,72 | 33,46 | 0 |
| 2272 | 0 | 0 | 0 | 0 | 0 |   | 0 | 4 | 0 | 3 | 50   | 1,64 | 18,59 | 0 |
| 2273 | 0 | 0 | 0 | 0 | 0 |   | 0 | 1 | 0 | 0 | 94   | 1,72 | 31,77 | 0 |
| 2274 | 0 | 0 | 0 | 0 | 0 |   | 1 | 3 | 1 | 1 | 50   | 1,53 | 21,36 | 0 |
| 2275 | 0 | 0 | 0 | 0 | 0 |   | 0 | 1 | 0 | 0 | 53   | 1,62 | 20,2  | 0 |
| 2276 | 0 | 0 | 0 | 0 | 0 |   | 0 | 1 | 0 | 0 | 53   | 1,62 | 20,2  | 0 |

|      |   |   |   |   |   |   |   |   |   |   |      |      |       |   |
|------|---|---|---|---|---|---|---|---|---|---|------|------|-------|---|
| 2277 | 2 | 0 | 0 | 0 | 0 | 1 | 0 | 4 | 0 | 3 | 64   | 1,61 | 24,69 | 0 |
| 2278 | 2 | 0 | 0 | 0 | 0 | 1 | 0 | 4 | 0 | 3 | 64   | 1,61 | 24,69 | 0 |
| 2279 | 0 | 0 | 0 | 0 | 0 | 1 | 1 | 3 | 1 | 1 | 50   | 1,63 | 18,82 | 0 |
| 2280 | 0 | 0 | 0 | 0 | 0 | 1 | 1 | 3 | 1 | 1 | 50   | 1,63 | 18,82 | 0 |
| 2281 | 1 | 0 | 0 | 0 | 0 | 1 | 0 | 1 | 0 | 0 | 72,5 | 1,65 | 26,63 | 0 |
| 2282 | 0 | 1 | 1 | 0 | 1 | 1 | 1 | 3 | 2 | 0 | 59   | 1,62 | 22,48 | 0 |
| 2283 | 0 | 0 | 0 | 0 | 0 | 1 | 0 | 3 | 0 | 2 | 52   | 1,57 | 21,1  | 0 |
| 2284 | 0 | 0 | 0 | 0 | 0 | 1 | 0 | 3 | 0 | 2 | 52   | 1,57 | 21,1  | 0 |
| 2285 | 1 | 0 | 0 | 0 | 0 | 1 | 0 | 2 | 0 | 1 | 62   | 1,69 | 21,71 | 0 |
| 2286 | 1 | 0 | 0 | 0 | 0 | 1 | 0 | 2 | 0 | 1 | 62   | 1,69 | 21,71 | 0 |
| 2287 | 0 | 0 | 0 | 0 | 1 | 1 | 1 | 2 | 1 | 0 | 60   | 1,67 | 21,51 | 0 |
| 2288 | 0 | 0 | 0 | 0 | 1 | 1 | 1 | 2 | 1 | 0 | 60   | 1,67 | 21,51 | 0 |
| 2289 | 1 | 0 | 0 | 0 | 0 | 1 | 0 | 1 | 0 | 0 | 63   | 1,56 | 25,89 | 0 |
| 2290 | 1 | 0 | 0 | 0 | 0 | 4 | 0 | 4 | 0 | 3 | 55   | 1,52 | 23,81 | 0 |
| 2291 | 1 | 0 | 0 | 0 | 0 | 4 | 0 | 4 | 0 | 3 | 55   | 1,52 | 23,81 | 0 |
| 2292 | 2 | 0 | 0 | 0 | 0 | 3 | 1 | 3 | 1 | 2 | 52   | 1,6  | 20,31 | 0 |
| 2293 | 2 | 0 | 0 | 0 | 0 | 3 | 1 | 3 | 1 | 2 | 52   | 1,6  | 20,31 | 0 |
| 2294 | 2 | 0 | 0 | 0 | 0 | 3 | 0 | 1 | 0 | 0 | 83   | 1,48 | 37,89 | 0 |
| 2295 | 2 | 0 | 0 | 0 | 0 | 3 | 0 | 1 | 0 | 0 | 83   | 1,48 | 37,89 | 0 |
| 2296 | 2 | 0 | 0 | 0 | 0 | 1 | 1 | 2 | 1 | 0 | 63   | 1,6  | 24,61 | 0 |
| 2297 | 2 | 0 | 0 | 0 | 0 | 1 | 1 | 2 | 1 | 0 | 63   | 1,6  | 24,61 | 0 |
| 2298 | 1 | 0 | 0 | 0 | 1 | 1 | 1 | 3 | 1 | 1 | 59   | 1,64 | 21,94 | 0 |
| 2299 | 1 | 0 | 0 | 0 | 1 | 1 | 1 | 3 | 1 | 1 | 59   | 1,64 | 21,94 | 0 |
| 2300 | 1 | 1 | 1 | 0 | 0 | 1 | 1 | 2 | 1 | 0 | 64   | 1,62 | 24,39 | 0 |
| 2301 | 1 | 1 | 1 | 0 | 0 | 1 | 1 | 2 | 1 | 0 | 64   | 1,62 | 24,39 | 0 |
| 2302 | 1 | 0 | 0 | 0 | 0 | 1 | 0 | 2 | 0 | 1 | 72   | 1,7  | 24,91 | 0 |
| 2303 | 1 | 0 | 0 | 0 | 0 | 1 | 0 | 2 | 0 | 1 | 72   | 1,7  | 24,91 | 0 |
| 2304 | 0 | 0 | 0 | 0 | 0 | 2 | 1 | 3 | 2 | 0 | 77   | 1,61 | 29,71 | 0 |
| 2305 | 0 | 0 | 0 | 0 | 0 | 2 | 1 | 3 | 2 | 0 | 77   | 1,61 | 29,71 | 0 |
| 2306 | 2 | 0 | 0 | 0 | 1 | 1 | 0 | 3 | 0 | 2 | 49   | 1,63 | 18,44 | 0 |
| 2307 | 2 | 0 | 0 | 0 | 1 | 1 | 0 | 3 | 0 | 2 | 49   | 1,63 | 18,44 | 0 |
| 2308 | 1 | 0 | 0 | 0 | 1 | 1 | 0 | 1 | 0 | 0 | 61   | 1,64 | 22,68 | 0 |
| 2309 | 1 | 1 | 1 | 0 | 0 | 3 | 1 | 2 | 1 | 0 | 52   | 1,63 | 19,57 | 0 |

|      |   |   |   |   |   |   |   |   |   |   |     |      |       |   |
|------|---|---|---|---|---|---|---|---|---|---|-----|------|-------|---|
| 2310 | 1 | 1 | 1 | 0 | 0 | 3 | 1 | 2 | 1 | 0 | 52  | 1,63 | 19,57 | 0 |
| 2311 | 0 | 0 | 0 | 0 | 0 | 1 | 1 | 2 | 1 | 0 | 51  | 1,58 | 20,43 | 0 |
| 2312 | 0 | 0 | 0 | 0 | 0 | 1 | 1 | 2 | 1 | 0 | 51  | 1,58 | 20,43 | 0 |
| 2313 | 0 | 0 | 0 | 0 | 0 | 1 | 1 | 4 | 2 | 1 | 60  | 1,7  | 20,76 | 0 |
| 2314 | 0 | 0 | 0 | 0 | 0 | 1 | 1 | 4 | 2 | 1 | 60  | 1,7  | 20,76 | 0 |
| 2315 | 2 | 0 | 0 | 0 | 0 | 3 | 1 | 4 | 1 | 2 | 85  | 1,62 | 32,39 | 0 |
| 2316 | 2 | 0 | 0 | 0 | 0 | 3 | 1 | 4 | 1 | 2 | 85  | 1,62 | 32,39 | 0 |
| 2317 | 2 | 0 | 0 | 0 | 0 | 3 | 1 | 4 | 1 | 2 | 85  | 1,62 | 32,39 | 0 |
| 2318 | 1 | 0 | 1 | 0 | 1 | 1 | 0 | 1 | 0 | 0 | 123 | 1,66 | 44,64 | 0 |
| 2319 | 0 | 0 | 0 | 0 | 0 |   | 0 | 1 | 0 | 0 | 79  | 1,62 | 30,1  | 0 |
| 2320 | 0 | 0 | 0 | 0 | 0 |   | 0 | 1 | 0 | 0 | 79  | 1,62 | 30,1  | 0 |
| 2321 | 0 | 0 | 0 | 0 | 0 |   | 1 | 2 | 1 | 0 | 55  | 1,7  | 19,03 | 0 |
| 2322 | 0 | 0 | 0 | 0 | 0 |   | 1 | 3 | 2 | 0 | 63  | 1,63 | 23,71 | 0 |
| 2323 | 0 | 0 | 0 | 0 | 0 |   | 1 | 3 | 2 | 0 | 63  | 1,63 | 23,71 | 0 |
| 2324 | 0 | 0 | 0 | 0 | 0 |   | 1 | 2 | 1 | 0 | 55  | 1,7  | 19,03 | 0 |
| 2325 | 0 | 0 | 0 | 0 | 0 |   | 0 | 1 | 0 | 0 | 64  | 1,66 | 23,23 | 0 |
| 2326 | 0 | 0 | 0 | 0 | 0 |   | 0 | 1 | 0 | 0 | 75  | 1,58 | 30,04 | 0 |
| 2327 | 0 | 0 | 0 | 0 | 0 |   | 0 | 1 | 0 | 0 | 68  | 1,65 | 24,98 | 0 |
| 2328 | 0 | 0 | 0 | 0 | 0 |   | 0 | 1 | 0 | 0 | 66  | 1,68 | 23,38 | 0 |
| 2329 | 0 | 0 | 0 | 0 | 0 |   | 0 | 3 | 0 | 2 | 50  | 1,55 | 20,81 | 0 |
| 2330 | 0 | 0 | 0 | 0 | 0 |   | 0 | 1 | 0 | 0 | 58  | 1,64 | 21,56 | 0 |
| 2331 | 0 | 0 | 0 | 0 | 0 |   | 0 | 1 | 0 | 0 | 49  | 1,62 | 18,67 | 0 |
| 2332 | 2 | 0 | 0 | 0 | 1 | 1 | 1 | 3 | 1 | 1 | 69  | 1,69 | 24,16 | 0 |
| 2333 | 2 | 0 | 0 | 0 | 1 | 1 | 1 | 3 | 1 | 1 | 69  | 1,69 | 24,16 | 0 |
| 2334 | 0 | 0 | 1 | 0 | 0 |   | 0 | 3 | 0 | 2 | 48  | 1,64 | 17,85 | 0 |
| 2335 | 2 | 0 | 0 | 0 | 1 | 1 | 1 | 2 | 1 | 0 | 67  | 1,52 | 29    | 0 |
| 2336 | 2 | 0 | 0 | 0 | 1 | 1 | 1 | 2 | 1 | 0 | 67  | 1,52 | 29    | 0 |
| 2337 | 0 | 0 | 0 | 0 | 0 | 1 | 0 | 2 | 0 | 1 | 46  | 1,6  | 17,97 | 0 |
| 2338 | 2 | 0 | 0 | 0 | 0 | 6 | 1 | 2 | 1 | 0 | 50  | 1,5  | 22,22 | 0 |
| 2339 | 2 | 0 | 0 | 0 | 0 | 6 | 1 | 2 | 1 | 0 | 50  | 1,5  | 22,22 | 0 |
| 2340 | 2 | 0 | 0 | 0 | 1 | 3 | 1 | 2 | 1 | 0 | 54  | 1,63 | 20,32 | 0 |
| 2341 | 2 | 0 | 0 | 0 | 1 | 3 | 1 | 2 | 1 | 0 | 54  | 1,63 | 20,32 | 0 |
| 2342 | 2 | 0 | 0 | 0 | 1 | 1 | 0 | 1 | 0 | 0 | 56  | 1,66 | 20,32 | 0 |

|      |   |   |   |   |   |   |   |   |   |   |      |      |       |   |
|------|---|---|---|---|---|---|---|---|---|---|------|------|-------|---|
| 2343 | 1 | 0 | 1 | 0 | 0 | 1 | 0 | 1 | 0 | 0 | 71   | 1,56 | 29,17 | 0 |
| 2344 | 0 | 0 | 0 | 0 | 0 | 3 | 1 | 2 | 1 | 0 | 71   | 1,63 | 26,72 | 0 |
| 2345 | 0 | 0 | 0 | 0 | 0 | 2 | 0 | 1 | 0 | 0 | 62   | 1,69 | 21,71 | 0 |
| 2346 | 0 | 0 | 0 | 0 | 0 | 3 | 1 | 2 | 1 | 0 | 71   | 1,63 | 26,72 | 0 |
| 2347 | 0 | 0 | 0 | 0 | 1 | 1 | 1 | 2 | 1 | 0 | 65   | 1,63 | 24,46 | 0 |
| 2348 | 0 | 0 | 0 | 0 | 0 | 2 | 0 | 1 | 0 | 0 | 62   | 1,69 | 21,71 | 0 |
| 2349 | 0 | 0 | 0 | 0 | 0 | 3 | 0 | 1 | 0 | 0 | 58   | 1,7  | 20,07 | 0 |
| 2350 | 0 | 0 | 0 | 0 | 1 | 1 | 1 | 2 | 1 | 0 | 65   | 1,63 | 24,46 | 0 |
| 2351 | 0 | 0 | 0 | 0 | 0 | 3 | 0 | 1 | 0 | 0 | 58   | 1,7  | 20,07 | 0 |
| 2352 | 1 | 0 | 0 | 0 | 1 | 1 | 1 | 3 | 1 | 1 | 64   | 1,68 | 22,68 | 0 |
| 2353 | 1 | 0 | 0 | 0 | 1 | 1 | 1 | 3 | 1 | 1 | 64   | 1,68 | 22,68 | 0 |
| 2354 | 1 | 0 | 0 | 0 | 1 | 1 | 1 | 3 | 1 | 1 | 64   | 1,68 | 22,68 | 0 |
| 2355 | 1 | 0 | 0 | 0 | 0 | 6 | 0 | 1 | 0 | 0 | 55   | 1,55 | 22,89 | 0 |
| 2356 | 1 | 1 | 0 | 0 | 1 | 1 | 1 | 4 | 2 | 1 | 74   | 1,65 | 27,18 | 0 |
| 2357 | 1 | 1 | 0 | 0 | 1 | 1 | 1 | 4 | 2 | 1 | 74   | 1,65 | 27,18 | 0 |
| 2358 | 1 | 1 | 0 | 0 | 1 | 1 | 1 | 4 | 2 | 1 | 74   | 1,65 | 27,18 | 0 |
| 2359 | 1 | 0 | 0 | 0 | 0 | 3 | 1 | 3 | 2 | 0 | 75   | 1,54 | 31,62 | 0 |
| 2360 | 1 | 0 | 1 | 0 | 1 | 3 | 1 | 3 | 1 | 1 | 42   | 1,56 | 17,26 | 0 |
| 2361 | 1 | 0 | 1 | 0 | 1 | 3 | 1 | 3 | 1 | 1 | 42   | 1,56 | 17,26 | 0 |
| 2362 | 1 | 0 | 0 | 0 | 0 | 1 | 0 | 1 | 0 | 0 | 52   | 1,59 | 20,57 | 0 |
| 2363 | 1 | 0 | 0 | 0 | 0 | 1 | 0 | 1 | 0 | 0 | 52   | 1,59 | 20,57 | 0 |
| 2364 | 2 | 0 | 1 | 0 | 1 | 5 | 1 | 2 | 1 | 0 | 40   | 1,42 | 19,84 | 0 |
| 2365 | 2 | 0 | 1 | 0 | 1 | 5 | 1 | 2 | 1 | 0 | 40   | 1,42 | 19,84 | 0 |
| 2366 | 0 | 0 | 0 | 0 | 1 | 1 | 0 | 1 | 0 | 0 | 60   | 1,75 | 19,59 | 0 |
| 2367 | 0 | 0 | 0 | 0 | 1 | 1 | 0 | 1 | 0 | 0 | 60   | 1,75 | 19,59 | 0 |
| 2368 | 0 | 0 | 0 | 0 | 1 | 1 | 0 | 1 | 0 | 0 | 60   | 1,75 | 19,59 | 0 |
| 2369 | 1 | 0 | 0 | 0 | 0 | 3 | 1 | 2 | 1 | 0 | 54   | 1,6  | 21,09 | 0 |
| 2370 | 0 | 0 | 0 | 0 | 0 |   | 1 | 2 | 1 | 0 | 52,5 | 1,59 | 20,77 | 0 |
| 2371 | 0 | 0 | 0 | 0 | 0 |   | 1 | 7 | 3 | 3 | 78   | 1,61 | 30,09 | 0 |
| 2372 | 0 | 0 | 0 | 0 | 0 |   | 1 | 2 | 1 | 0 | 79   | 1,67 | 28,33 | 0 |
| 2373 | 0 | 0 | 0 | 0 | 0 |   | 1 | 2 | 1 | 0 | 79   | 1,67 | 28,33 | 0 |
| 2374 | 0 | 0 | 0 | 0 | 0 |   | 1 | 7 | 3 | 3 | 78   | 1,61 | 30,09 | 0 |
| 2375 | 0 | 0 | 0 | 0 | 0 |   | 0 | 1 | 0 | 0 | 73   | 1,62 | 27,82 | 0 |



|      |   |   |   |   |   |
|------|---|---|---|---|---|
| 2376 | 0 | 0 | 0 | 0 | 0 |
| 2377 | 0 | 0 | 0 | 0 | 0 |
| 2378 | 0 | 0 | 0 | 0 | 0 |
| 2379 | 0 | 0 | 0 | 0 | 0 |
| 2380 | 0 | 0 | 0 | 0 | 0 |
| 2381 | 0 | 0 | 0 | 0 | 0 |
| 2382 | 0 | 0 | 0 | 0 | 0 |
| 2383 | 0 | 0 | 0 | 0 | 0 |
| 2384 | 0 | 0 | 0 | 0 | 0 |
| 2385 | 0 | 0 | 0 | 0 | 0 |
| 2386 | 0 | 0 | 0 | 0 | 0 |
| 2387 | 0 | 0 | 0 | 0 | 0 |
| 2388 | 0 | 0 | 0 | 0 | 0 |
| 2389 | 0 | 0 | 0 | 0 | 0 |
| 2390 | 0 | 0 | 0 | 0 | 0 |
| 2391 | 0 | 0 | 0 | 0 | 0 |
| 2392 | 0 | 1 | 0 | 0 | 0 |
| 2393 | 0 | 0 | 0 | 0 | 0 |
| 2394 | 0 | 0 | 0 | 0 | 0 |
| 2395 | 0 | 0 | 0 | 0 | 0 |
| 2396 | 0 | 0 | 0 | 0 | 0 |
| 2397 | 0 | 0 | 0 | 0 | 0 |
| 2398 | 0 | 0 | 0 | 0 | 0 |
| 2399 | 1 | 0 | 0 | 0 | 0 |
| 2400 | 0 | 0 | 1 | 0 | 0 |
| 2401 | 1 | 0 | 0 | 0 | 0 |
| 2402 | 1 | 0 | 0 | 0 | 0 |
| 2403 | 0 | 0 | 1 | 0 | 0 |
| 2404 | 1 | 0 | 0 | 0 | 0 |
| 2405 | 1 | 0 | 0 | 0 | 0 |
| 2406 | 1 | 0 | 0 | 0 | 0 |
| 2407 | 0 | 0 | 0 | 0 | 0 |
| 2408 | 0 | 0 | 0 | 0 | 0 |

|   |   |   |   |   |     |      |       |   |
|---|---|---|---|---|-----|------|-------|---|
|   | 0 | 1 | 0 | 0 | 73  | 1,62 | 27,82 | 0 |
|   | 0 | 1 | 0 | 0 | 50  | 1,63 | 18,82 | 0 |
|   | 0 | 1 | 0 | 0 | 74  | 1,76 | 23,89 | 0 |
|   | 0 | 1 | 0 | 0 | 72  | 1,74 | 23,78 | 0 |
|   | 1 | 9 | 1 | 7 | 68  | 1,55 | 28,3  | 0 |
|   | 1 | 2 | 1 | 0 | 65  | 1,66 | 23,59 | 0 |
|   | 0 | 1 | 0 | 0 | 57  | 1,6  | 22,27 | 0 |
|   | 1 | 2 | 1 | 0 | 60  | 1,6  | 23,44 | 0 |
|   | 1 | 2 | 1 | 0 | 61  | 1,68 | 21,61 | 0 |
|   | 0 | 1 | 0 | 0 | 55  | 1,72 | 18,59 | 0 |
|   | 1 | 4 | 2 | 1 | 44  | 1,56 | 18,08 | 0 |
|   | 1 | 3 | 2 | 0 | 76  | 1,64 | 28,26 | 0 |
|   | 0 | 2 | 0 | 1 | 58  | 1,65 | 21,3  | 0 |
|   | 0 | 1 | 0 | 0 | 68  | 1,6  | 26,56 | 0 |
|   | 1 | 4 | 2 | 2 | 62  | 1,61 | 23,92 | 0 |
|   | 1 | 2 | 1 | 0 | 68  | 1,63 | 25,59 | 0 |
|   | 0 | 1 | 0 | 0 | 48  | 1,64 | 17,85 | 0 |
|   | 0 | 1 | 0 | 0 | 85  | 1,8  | 26,23 | 0 |
|   | 0 | 1 | 0 | 0 | 77  | 1,67 | 27,61 | 0 |
|   | 1 | 4 | 2 | 1 | 44  | 1,56 | 18,08 | 0 |
|   | 0 | 2 | 0 | 1 | 46  | 1,68 | 16,3  | 0 |
|   | 1 | 2 | 1 | 0 | 64  | 1,62 | 24,39 | 0 |
|   | 0 | 4 | 0 | 3 | 124 | 1,64 | 46,1  | 0 |
|   | 1 | 3 | 1 | 1 | 99  | 1,6  | 38,67 | 0 |
|   | 1 | 2 | 1 | 0 | 84  | 1,59 | 33,23 | 0 |
| 1 | 1 | 2 | 1 | 0 | 50  | 1,6  | 19,53 | 0 |
| 1 | 1 | 2 | 1 | 0 | 50  | 1,6  | 19,53 | 0 |
|   | 0 | 1 | 0 | 0 | 65  | 1,62 | 24,77 | 0 |
| 2 | 1 | 3 | 1 | 1 | 56  | 1,49 | 25,22 | 0 |
| 2 | 1 | 3 | 1 | 1 | 56  | 1,49 | 25,22 | 0 |
| 1 | 0 | 1 | 0 | 0 | 80  | 1,64 | 29,74 | 0 |
| 1 | 0 | 1 | 0 | 0 | 68  | 1,59 | 26,9  | 0 |
| 1 | 0 | 1 | 0 | 0 | 68  | 1,59 | 26,9  | 0 |

|      |   |   |   |   |   |
|------|---|---|---|---|---|
| 2409 | 1 | 0 | 0 | 0 | 0 |
| 2410 | 1 | 0 | 0 | 0 | 0 |
| 2411 | 1 | 0 | 0 | 0 | 0 |
| 2412 | 1 | 0 | 0 | 0 | 0 |
| 2413 | 1 | 0 | 0 | 0 | 0 |
| 2414 | 1 | 0 | 0 | 0 | 0 |
| 2415 | 1 | 0 | 0 | 0 | 0 |
| 2416 | 0 | 0 | 0 | 0 | 0 |
| 2417 | 0 | 0 | 0 | 0 | 0 |
| 2418 | 2 | 0 | 0 | 0 | 1 |
| 2419 | 1 | 0 | 0 | 0 | 1 |
| 2420 | 2 | 0 | 0 | 0 | 1 |
| 2421 | 2 | 0 | 0 | 0 | 1 |
| 2422 | 2 | 0 | 1 | 0 | 1 |
| 2423 | 2 | 0 | 1 | 0 | 1 |
| 2424 | 3 | 1 | 0 | 0 | 0 |
| 2425 | 3 | 1 | 0 | 0 | 0 |
| 2426 | 0 | 0 | 0 | 0 | 0 |
| 2427 | 0 | 1 | 0 | 0 | 0 |
| 2428 | 0 | 1 | 0 | 0 | 0 |
| 2429 | 0 | 0 | 1 | 0 | 0 |
| 2430 | 0 | 0 | 1 | 0 | 0 |
| 2431 | 0 | 1 | 0 | 0 | 0 |
| 2432 | 2 | 0 | 0 | 0 | 0 |
| 2433 | 2 | 0 | 0 | 0 | 0 |
| 2434 | 1 | 0 | 0 | 0 | 0 |
| 2435 | 1 | 0 | 0 | 0 | 0 |
| 2436 | 1 | 0 | 0 | 0 | 0 |
| 2437 | 2 | 0 | 0 | 0 | 0 |
| 2438 | 2 | 0 | 0 | 0 | 0 |
| 2439 | 0 | 0 | 0 | 0 | 1 |
| 2440 | 0 | 0 | 0 | 0 | 1 |
| 2441 | 0 | 0 | 1 | 0 | 0 |

|   |   |   |   |   |    |      |       |   |
|---|---|---|---|---|----|------|-------|---|
| 1 | 1 | 4 | 1 | 2 | 57 | 1,57 | 23,12 | 0 |
| 1 | 1 | 4 | 1 | 2 | 57 | 1,57 | 23,12 | 0 |
| 1 | 0 | 1 | 0 | 0 | 80 | 1,67 | 28,69 | 0 |
| 1 | 0 | 1 | 0 | 0 | 80 | 1,67 | 28,69 | 0 |
| 1 | 0 | 1 | 0 | 0 | 80 | 1,67 | 28,69 | 0 |
| 1 | 1 | 6 | 3 | 2 | 45 | 1,64 | 16,73 | 0 |
| 1 | 1 | 6 | 3 | 2 | 45 | 1,64 | 16,73 | 0 |
| 6 | 0 | 1 | 0 | 0 | 49 | 1,64 | 18,22 | 0 |
| 1 | 0 | 1 | 0 | 0 | 54 | 1,6  | 21,09 | 0 |
| 3 | 0 | 2 | 0 | 1 | 49 | 1,6  | 19,14 | 0 |
| 1 | 0 | 2 | 0 | 1 | 65 | 1,6  | 25,39 | 0 |
| 1 | 0 | 1 | 0 | 0 | 58 | 1,67 | 20,8  | 0 |
| 1 | 0 | 1 | 0 | 0 | 58 | 1,67 | 20,8  | 0 |
| 1 | 0 | 1 | 0 | 0 | 60 | 1,72 | 20,28 | 0 |
| 1 | 0 | 1 | 0 | 0 | 60 | 1,72 | 20,28 | 0 |
| 1 | 1 | 2 | 1 | 1 | 65 | 1,7  | 22,49 | 0 |
| 1 | 1 | 2 | 1 | 1 | 65 | 1,7  | 22,49 | 0 |
| 1 | 0 | 2 | 0 | 1 | 68 | 1,63 | 25,59 | 0 |
| 1 | 1 | 3 | 1 | 1 | 57 | 1,65 | 20,94 | 0 |
| 1 | 1 | 3 | 1 | 1 | 57 | 1,65 | 20,94 | 0 |
| 1 | 1 | 2 | 1 | 0 | 63 | 1,68 | 22,32 | 0 |
| 1 | 1 | 2 | 1 | 0 | 63 | 1,68 | 22,32 | 0 |
| 1 | 1 | 3 | 1 | 1 | 57 | 1,65 | 20,94 | 0 |
| 2 | 1 | 3 | 1 | 1 | 53 | 1,62 | 20,2  | 0 |
| 2 | 1 | 3 | 1 | 1 | 53 | 1,62 | 20,2  | 0 |
| 1 | 1 | 2 | 1 | 0 | 53 | 1,58 | 21,23 | 0 |
| 5 | 1 | 3 | 2 | 0 | 57 | 1,65 | 20,94 | 0 |
| 5 | 1 | 3 | 2 | 0 | 57 | 1,65 | 20,94 | 0 |
| 1 | 1 | 2 | 1 | 0 | 93 | 1,59 | 36,79 | 0 |
| 1 | 1 | 2 | 1 | 0 | 93 | 1,59 | 36,79 | 0 |
| 1 | 1 | 3 | 1 | 1 | 58 | 1,66 | 21,05 | 0 |
| 1 | 1 | 3 | 1 | 1 | 58 | 1,66 | 21,05 | 0 |
| 3 | 0 | 1 | 0 | 0 | 56 | 1,54 | 23,61 | 0 |

|      |   |   |   |   |   |
|------|---|---|---|---|---|
| 2442 | 0 | 0 | 1 | 0 | 0 |
| 2443 | 1 | 1 | 0 | 0 | 1 |
| 2444 | 1 | 1 | 0 | 0 | 1 |
| 2445 | 0 | 1 | 1 | 0 | 0 |
| 2446 | 1 | 0 | 0 | 0 | 0 |
| 2447 | 1 | 0 | 0 | 0 | 0 |
| 2448 | 1 | 0 | 0 | 0 | 0 |
| 2449 | 1 | 0 | 0 | 0 | 0 |
| 2450 | 1 | 0 | 1 | 0 | 1 |
| 2451 | 1 | 0 | 1 | 0 | 1 |
| 2452 | 1 | 0 | 0 | 0 | 0 |
| 2453 | 1 | 0 | 0 | 0 | 0 |
| 2454 | 0 | 0 | 0 | 0 | 0 |
| 2455 | 0 | 0 | 0 | 0 | 0 |
| 2456 | 0 | 0 | 0 | 0 | 0 |
| 2457 | 0 | 0 | 0 | 0 | 0 |
| 2458 | 0 | 0 | 0 | 0 | 0 |
| 2459 | 0 | 0 | 0 | 0 | 0 |
| 2460 | 0 | 0 | 0 | 0 | 0 |
| 2461 | 2 | 0 | 0 | 1 | 0 |
| 2462 | 2 | 0 | 0 | 1 | 0 |

|   |   |   |   |   |    |      |       |   |
|---|---|---|---|---|----|------|-------|---|
| 3 | 0 | 1 | 0 | 0 | 56 | 1,54 | 23,61 | 0 |
| 2 | 0 | 1 | 0 | 0 | 59 | 1,68 | 20,9  | 0 |
| 2 | 0 | 1 | 0 | 0 | 59 | 1,68 | 20,9  | 0 |
| 1 | 1 | 3 | 1 | 1 | 95 | 1,75 | 31,02 | 0 |
| 3 | 1 | 5 | 4 | 0 | 56 | 1,52 | 24,24 | 0 |
| 3 | 1 | 5 | 4 | 0 | 56 | 1,52 | 24,24 | 0 |
| 1 | 0 | 1 | 0 | 0 | 55 | 1,65 | 20,2  | 0 |
| 1 | 0 | 1 | 0 | 0 | 55 | 1,65 | 20,2  | 0 |
| 6 | 1 | 2 | 1 | 0 | 63 | 1,64 | 23,42 | 0 |
| 6 | 1 | 2 | 1 | 0 | 63 | 1,64 | 23,42 | 0 |
| 1 | 1 | 2 | 1 | 0 | 56 | 1,66 | 20,32 | 0 |
| 1 | 1 | 2 | 1 | 0 | 56 | 1,66 | 20,32 | 0 |
|   | 1 | 3 | 1 | 1 | 53 | 1,55 | 22,06 | 0 |
|   | 1 | 2 | 1 | 0 | 64 | 1,74 | 21,14 | 0 |
|   | 0 | 8 | 0 | 7 |    | 1,63 |       | 0 |
|   | 0 | 2 | 0 | 1 | 64 | 1,8  | 19,75 | 0 |
|   | 1 | 3 | 1 | 1 | 63 | 1,69 | 22,06 | 0 |
|   | 0 | 1 | 0 | 0 | 45 | 1,63 | 16,94 | 0 |
|   | 1 | 5 | 3 | 1 | 84 | 1,6  | 32,81 | 0 |
| 1 | 0 | 3 | 0 | 2 | 71 | 1,69 | 24,86 | 0 |
| 1 | 0 | 3 | 0 | 2 | 71 | 1,69 | 24,86 | 0 |

| ID Code | History IUGR (0= nee, 1=ja) | Gest age delivery | Mode delivery     | Medication | Diagnosis (1=NL, 2=EPE, 3=LPE, 4=GH, 5=EH, 6=HELLP, 7=IUGR) |
|---------|-----------------------------|-------------------|-------------------|------------|-------------------------------------------------------------|
| 1       | 0                           | 39,14             | Vaginale partus   | 0          | 1                                                           |
| 2       | 0                           | 40                | Secundaire sectio | 0          | 1                                                           |
| 3       | 0                           | 35,57             | Vaginale partus   | 0          | 1                                                           |
| 4       | 0                           | 40                | Vaginale partus   | 0          | 1                                                           |
| 5       | 0                           | 33,86             | Primaire sectio   | 0          | 1                                                           |
| 6       | 0                           | 37,57             | Vaginale partus   | 0          | 1                                                           |
| 7       | 0                           | 33                | Primaire sectio   | 0          | 1                                                           |
| 8       | 0                           | 40,28             | Vaginale partus   | 0          | 1                                                           |
| 9       | 0                           | 37,14             | Vaginale partus   | 0          | 1                                                           |
| 10      | 0                           | 40                | Vaginale partus   | 0          | 1                                                           |
| 11      | 0                           | 30,72             | Primaire sectio   | 0          | 1                                                           |
| 12      | 0                           | 39,57             | Vaginale partus   | 2          | 1                                                           |
| 13      | 0                           | 38,72             | Vaginale partus   | 0          | 1                                                           |
| 14      | 0                           | 34,43             | Primaire sectio   | 0          | 1                                                           |
| 15      | 0                           | 37,14             | Secundaire sectio | 0          | 1                                                           |
| 16      | 0                           | 37,14             | Secundaire sectio | 0          | 1                                                           |
| 17      | 0                           | 34,43             | Primaire sectio   | 0          | 1                                                           |
| 18      | 0                           | 38,86             | Vaginale partus   | 0          | 1                                                           |
| 19      | 0                           | 38,86             | Vaginale partus   | 0          | 1                                                           |
| 20      | 0                           | 37,57             | Secundaire sectio | 0          | 1                                                           |
| 21      | 0                           | 37,57             | Secundaire sectio | 0          | 1                                                           |
| 22      | 0                           | 40,14             | vaginaal          | 1          | 1                                                           |
| 23      | 0                           | 38,28             | Vaginale partus   | 0          | 1                                                           |
| 24      | 0                           | 39                | Repeat sectio     | 0          | 1                                                           |
| 25      | 0                           | 39                | Repeat sectio     | 0          | 1                                                           |
| 26      | 0                           | 40                | Vaginale partus   | 0          | 1                                                           |
| 27      | 0                           | 40                | Vaginale partus   | 0          | 1                                                           |
| 28      | 0                           | 39,28             | Secundaire sectio | 0          | 1                                                           |
| 29      | 0                           | 39,28             | Secundaire sectio | 0          | 1                                                           |
| 30      | 0                           | 40,43             | Vaginale partus   | 0          | 1                                                           |
| 31      | 0                           | 40,43             | Vaginale partus   | 0          | 1                                                           |
| 32      | 0                           | 23,57             | Vaginale partus   | 1          | 1                                                           |

|    |   |       |                   |   |   |
|----|---|-------|-------------------|---|---|
| 33 | 0 | 23,57 | Vaginale partus   | 1 | 1 |
| 34 | 0 | 34    | prim.sectio       | 0 | 1 |
| 35 | 0 | 37,28 | vaginaal          | 0 | 1 |
| 36 | 0 | 34,72 | sec.sectio        | 0 | 1 |
| 37 | 0 | 37,43 | vaginaal          | 0 | 1 |
| 38 | 0 | 39    | Vaginale partus   | 0 | 1 |
| 39 | 0 | 39    | Vaginale partus   | 0 | 1 |
| 40 | 0 | 40,14 | Vaginale partus   | 0 | 1 |
| 41 | 0 | 39,43 | Primaire sectio   | 0 | 1 |
| 42 | 0 | 38,86 | Vaginale partus   | 0 | 1 |
| 43 | 0 | 31,43 | Primaire sectio   | 0 | 1 |
| 44 | 0 | 36    | Vaginale partus   | 0 | 1 |
| 45 | 0 | 37,14 | Primaire sectio   | 0 | 1 |
| 46 | 0 | 41,28 | Vaginale partus   | 0 | 1 |
| 47 | 0 | 40,43 | Vaginale partus   | 0 | 1 |
| 48 | 0 | 40,28 | Vaginale partus   | 0 | 1 |
| 49 | 0 | 37,14 | Primaire sectio   | 0 | 1 |
| 50 | 0 | 39    | prim.sectio       | 0 | 1 |
| 51 | 0 | 39,57 | Vaginale partus   | 0 | 1 |
| 52 | 0 | 37,86 | Vaginale partus   | 0 | 1 |
| 53 | 0 | 31,43 | Primaire sectio   | 0 | 1 |
| 54 | 0 | 32,43 | Secundaire sectio | 0 | 1 |
| 55 | 0 | 37,28 | Vaginale partus   | 0 | 1 |
| 56 | 0 | 38,57 | Vaginale partus   | 0 | 1 |
| 57 | 0 | 38,57 | Vaginale partus   | 0 | 1 |
| 58 | 0 | 39,14 | Vaginale partus   | 0 | 1 |
| 59 | 0 | 40,43 | Vaginale partus   | 0 | 1 |
| 60 | 0 | 34,14 | Vaginale partus   | 0 | 1 |
| 61 | 0 | 40,43 | Vaginale partus   | 0 | 1 |
| 62 | 0 | 38,57 | Vaginale partus   | 0 | 1 |
| 63 | 0 | 40,72 | vaginaal          | 0 | 1 |
| 64 | 0 | 40,43 | Vaginale partus   | 0 | 1 |
| 65 | 0 | 36,57 | Primaire sectio   | 0 | 1 |

|    |   |       |                   |   |   |
|----|---|-------|-------------------|---|---|
| 66 | 0 | 37,86 | Primaire sectio   | 0 | 1 |
| 67 | 0 | 40,43 | Vaginale partus   | 0 | 1 |
| 68 | 0 | 38    | Primaire sectio   | 0 | 1 |
| 69 | 0 | 38    | Primaire sectio   | 0 | 1 |
| 70 | 0 | 38,43 | Primaire sectio   | 0 | 1 |
| 71 | 0 | 38,14 | Vaginale partus   | 0 | 1 |
| 72 | 0 | 37,43 | Secundaire sectio | 0 | 1 |
| 73 | 0 | 38,72 | Secundaire sectio | 0 | 1 |
| 74 | 0 | 40,28 | Vaginale partus   | 0 | 1 |
| 75 | 0 | 35,86 | Vaginale partus   | 0 | 1 |
| 76 | 0 | 31,86 | Primaire sectio   | 0 | 1 |
| 77 | 0 | 40,43 | Vaginale partus   | 0 | 1 |
| 78 | 0 | 41    | Repeat sectio     | 0 | 1 |
| 79 | 0 | 35,43 | Vaginale partus   | 0 | 1 |
| 80 | 0 | 41,43 | Vaginale partus   | 0 | 1 |
| 81 | 0 | 33,86 | Vaginale partus   | 0 | 1 |
| 82 | 0 | 41,43 | Vaginale partus   | 0 | 1 |
| 83 | 0 | 40,72 | Vaginale partus   | 0 | 1 |
| 84 | 0 | 37,86 | Vaginale partus   | 0 | 1 |
| 85 | 0 | 37,86 | Vaginale partus   | 0 | 1 |
| 86 | 0 | 41,14 | Vaginale partus   | 0 | 1 |
| 87 | 0 | 31,43 | Vaginale partus   | 0 | 1 |
| 88 | 0 | 35,14 | Vaginale partus   | 0 | 1 |
| 89 | 0 | 38,57 | Vaginale partus   | 0 | 1 |
| 90 | 0 | 38,57 | Vaginale partus   | 0 | 1 |
| 91 | 0 | 39,43 | Vaginale partus   | 0 | 1 |
| 92 | 0 | 39,43 | Vaginale partus   | 0 | 1 |
| 93 | 0 | 41,57 | Vaginale partus   | 0 | 1 |
| 94 | 0 | 38,86 | Repeat sectio     | 0 | 1 |
| 95 | 0 | 38,43 | Vaginale partus   | 0 | 1 |
| 96 | 0 | 40    | Vaginale partus   | 0 | 1 |
| 97 | 0 | 37,86 | Vaginale partus   | 0 | 1 |
| 98 | 0 | 39,57 | Vaginale partus   | 0 | 1 |

|     |   |       |                 |   |   |
|-----|---|-------|-----------------|---|---|
| 99  | 0 | 40,86 | Vaginale partus | 0 | 1 |
| 100 | 0 | 40    | Vaginale partus | 0 | 1 |
| 101 | 0 | 40,14 | Vaginale partus | 0 | 1 |
| 102 | 0 | 40,86 |                 | 0 | 1 |
| 103 | 0 | 39,43 | Vaginale partus | 0 | 1 |
| 104 | 0 | 39,14 | Vaginale partus | 0 | 1 |
| 105 | 0 | 40,57 | Vaginale partus | 0 | 1 |
| 106 | 0 | 41,14 | Vaginale partus | 0 | 1 |
| 107 | 0 | 40,57 | Vaginale partus | 0 | 1 |
| 108 | 0 | 39,28 | Kunstverlossing | 0 | 1 |
| 109 | 0 | 38,28 | Primaire sectio | 0 | 1 |
| 110 | 0 | 38,28 | Primaire sectio | 0 | 1 |
| 111 | 0 | 40,43 | Vaginale partus | 0 | 1 |
| 112 | 0 | 40,43 | Vaginale partus | 0 | 1 |
| 113 | 0 | 39,86 | Vaginale partus | 0 | 1 |
| 114 | 0 | 41    | Vaginale partus | 0 | 1 |
| 115 | 0 | 40    | Vaginale partus | 0 | 1 |
| 116 | 0 | 39,57 | Vaginale partus | 0 | 1 |
| 117 | 0 | 38,72 | Primaire sectio | 0 | 1 |
| 118 | 0 | 37,14 | Vaginale partus | 0 | 1 |
| 119 | 0 | 39,86 | Vaginale partus | 0 | 1 |
| 120 | 0 | 41,28 | Vaginale partus | 0 | 1 |
| 121 | 0 | 38,14 | Vaginale partus | 0 | 1 |
| 122 | 0 | 37,72 | Primaire sectio | 0 | 1 |
| 123 | 0 | 39,72 | Vaginale partus | 0 | 1 |
| 124 | 0 | 41,28 | Vaginale partus | 0 | 1 |
| 125 | 0 | 41,57 | vaginaal        | 0 | 1 |
| 126 | 0 | 37,72 | Primaire sectio | 0 | 1 |
| 127 | 0 | 39,72 | Vaginale partus | 0 | 1 |
| 128 | 0 | 39,72 | Vaginale partus | 0 | 1 |
| 129 | 0 | 39,72 | Vaginale partus | 0 | 1 |
| 130 | 0 | 34    | Vaginale partus | 0 | 1 |
| 131 | 0 | 40,86 | vaginaal        | 0 | 1 |

|     |   |       |                   |   |   |
|-----|---|-------|-------------------|---|---|
| 132 | 0 | 34    | Vaginale partus   | 0 | 1 |
| 133 | 0 | 38,57 | Primaire sectio   | 0 | 1 |
| 134 | 0 | 36,72 | Vaginale partus   | 0 | 1 |
| 135 | 0 | 40,28 | Kunstverlossing   | 0 | 1 |
| 136 | 0 | 38,43 | Vaginale partus   | 0 | 1 |
| 137 | 0 | 37,43 | Vaginale partus   | 0 | 1 |
| 138 | 0 | 39,72 | Vaginale partus   | 0 | 1 |
| 139 | 0 | 39,28 | Vaginale partus   | 0 | 1 |
| 140 | 0 | 38,43 | Vaginale partus   | 0 | 1 |
| 141 | 0 | 40,43 | Primaire sectio   | 0 | 1 |
| 142 | 0 | 40,72 | Vaginale partus   | 0 | 1 |
| 143 | 0 | 41,57 | Vaginale partus   | 0 | 1 |
| 144 | 0 | 40,28 | Secundaire sectio | 0 | 1 |
| 145 | 0 | 40,28 | Secundaire sectio | 0 | 1 |
| 146 | 0 | 38,72 | sec.sectio        | 0 | 1 |
| 147 | 0 | 39    | Vaginale partus   | 0 | 1 |
| 148 | 0 | 38,43 | Vaginale partus   | 0 | 1 |
| 149 | 0 | 39,43 | Vaginale partus   | 0 | 1 |
| 150 | 0 | 38,72 | Vaginale partus   | 0 | 1 |
| 151 | 0 | 40,14 | Vaginale partus   | 0 | 1 |
| 152 | 0 | 39,72 | Vaginale partus   | 0 | 1 |
| 153 | 0 | 40,86 | Vaginale partus   | 0 | 1 |
| 154 | 0 | 39,72 | Vaginale partus   | 0 | 1 |
| 155 | 0 | 40,43 | Vaginale partus   | 0 | 1 |
| 156 | 0 | 40,72 | Vaginale partus   | 0 | 1 |
| 157 | 0 | 40,57 | vaginaal          | 0 | 1 |
| 158 | 0 | 39,86 | Vaginale partus   | 0 | 1 |
| 159 | 0 | 39,86 | Vaginale partus   | 0 | 1 |
| 160 | 0 | 41,28 | Vaginale partus   | 0 | 1 |
| 161 | 0 | 41,28 | Vaginale partus   | 0 | 1 |
| 162 | 0 | 38,28 | Primaire sectio   | 0 | 1 |
| 163 | 0 | 38,28 | Primaire sectio   | 0 | 1 |
| 164 | 0 | 39    | Vaginale partus   | 0 | 1 |



|     |   |       |                 |   |   |
|-----|---|-------|-----------------|---|---|
| 165 | 0 | 39    | Vaginale partus | 0 | 1 |
| 166 | 0 | 38,57 | Repeat sectio   | 0 | 1 |
| 167 | 0 | 38,57 | Repeat sectio   | 0 | 1 |
| 168 | 0 | 37,57 | vaginaal        | 0 | 1 |
| 169 | 0 | 34,86 | Vaginale partus | 0 | 1 |
| 170 | 0 | 40,28 | Vaginale partus | 0 | 1 |
| 171 | 0 | 40,28 | Vaginale partus | 0 | 1 |
| 172 | 0 | 40,57 | Kunstverlossing | 0 | 1 |
| 173 | 0 | 38,72 | Primaire sectio | 1 | 1 |
| 174 | 0 | 39,14 | Primaire sectio | 2 | 1 |
| 175 | 0 | 41,86 | vaginaal        | 2 | 1 |
| 176 | 0 | 36,43 | Vaginale partus | 2 | 1 |
| 177 | 0 | 35,72 | Primaire sectio | 2 | 1 |
| 178 | 0 | 39,43 | Repeat sectio   | 2 | 1 |
| 179 | 0 | 39,43 | Repeat sectio   | 2 | 1 |
| 180 | 0 | 39,43 | Repeat sectio   | 2 | 1 |
| 181 | 0 | 40    | Vaginale partus | 1 | 1 |
| 182 | 0 | 39,43 | Vaginale partus | 0 | 1 |
| 183 | 0 | 35,43 | Vaginale partus | 1 | 1 |
| 184 | 0 | 40,14 | Vaginale partus | 0 | 1 |
| 185 | 0 | 39,28 | Vaginale partus | 1 | 1 |
| 186 | 0 | 40,72 | Vaginale partus | 0 | 1 |
| 187 | 0 | 38,57 | Repeat sectio   | 0 | 1 |
| 188 | 0 | 39,28 | Vaginale partus | 0 | 1 |
| 189 | 0 | 39,57 | Vaginale partus | 0 | 1 |
| 190 | 0 | 35,86 | Primaire sectio | 0 | 1 |
| 191 | 0 | 35,86 | Primaire sectio | 0 | 1 |
| 192 | 0 | 40,86 | Vaginale partus | 1 | 1 |
| 193 | 0 | 39    | vaginaal        | 0 | 1 |
| 194 | 0 | 40,14 | vaginaal        | 1 | 1 |
| 195 | 0 | 40,14 | Vaginale partus | 0 | 1 |
| 196 | 0 | 39,57 | Vaginale partus | 0 | 1 |
| 197 | 0 | 39,57 | Vaginale partus | 0 | 1 |

|     |   |       |                   |   |   |
|-----|---|-------|-------------------|---|---|
| 198 | 0 | 40,72 | Vaginale partus   | 0 | 1 |
| 199 | 0 | 37,14 | Vaginale partus   | 0 | 1 |
| 200 | 0 | 28,57 | Secundaire sectio | 0 | 1 |
| 201 | 0 | 39,43 |                   | 1 | 1 |
| 202 | 0 | 39,43 |                   | 1 | 1 |
| 203 | 0 | 39,43 |                   | 1 | 1 |
| 204 | 0 | 37    | Secundaire sectio | 1 | 1 |
| 205 | 0 | 37    | Secundaire sectio | 1 | 1 |
| 206 | 0 | 40,72 | Vaginale partus   | 1 | 1 |
| 207 | 0 | 40,72 | Vaginale partus   | 1 | 1 |
| 208 | 0 | 41,14 | Vaginale partus   | 0 | 1 |
| 209 | 0 | 39,14 | Secundaire sectio | 0 | 1 |
| 210 | 0 | 39,86 | Vaginale partus   | 0 | 1 |
| 211 | 0 | 41,28 | Vaginale partus   | 0 | 1 |
| 212 | 0 | 40,86 | Vaginale partus   | 2 | 1 |
| 213 | 0 | 38,28 | Vaginale partus   | 0 | 1 |
| 214 | 0 | 38,28 | Vaginale partus   | 0 | 1 |
| 215 | 0 | 38,28 | Vaginale partus   | 2 | 1 |
| 216 | 0 | 38,28 | Vaginale partus   | 2 | 1 |
| 217 | 0 | 40,43 | Vaginale partus   | 0 | 1 |
| 218 | 0 | 39,72 | Vaginale partus   | 2 | 1 |
| 219 | 0 | 39,72 | Vaginale partus   | 2 | 1 |
| 220 | 0 | 39,72 | Vaginale partus   | 2 | 1 |
| 221 | 0 | 38,28 | Vaginale partus   | 0 | 1 |
| 222 | 0 | 37,86 | Vaginale partus   | 1 | 1 |
| 223 | 0 | 37,28 | Secundaire sectio | 0 | 1 |
| 224 | 0 | 35,57 | Secundaire sectio | 0 | 1 |
| 225 | 0 | 39,14 | Vaginale partus   | 0 | 1 |
| 226 | 0 | 36,86 | Vaginale partus   | 0 | 1 |
| 227 | 0 | 35,72 | Vaginale partus   | 0 | 1 |
| 228 | 0 | 39,14 | Vaginale partus   | 0 | 1 |
| 229 | 0 | 38,43 | Vaginale partus   | 2 | 1 |
| 230 | 0 | 38,43 | Vaginale partus   | 2 | 1 |

|     |   |       |                   |   |   |
|-----|---|-------|-------------------|---|---|
| 231 | 1 | 36,43 | Vaginale partus   | 0 | 1 |
| 232 | 1 | 36,43 | Vaginale partus   | 0 | 1 |
| 233 | 1 | 36,43 | Vaginale partus   | 0 | 1 |
| 234 | 0 | 37,28 | vaginaal          | 1 | 1 |
| 235 | 0 | 32,14 | Primaire sectio   | 0 | 1 |
| 236 | 0 | 37,14 | Vaginale partus   | 0 | 1 |
| 237 | 0 | 38,14 | Primaire sectio   | 0 | 1 |
| 238 | 0 | 38,14 | Primaire sectio   | 0 | 1 |
| 239 | 0 | 38,57 | vaginaal          | 0 | 1 |
| 240 | 0 | 40,14 | Secundaire sectio | 0 | 1 |
| 241 | 0 | 36,28 | Secundaire sectio | 0 | 1 |
| 242 | 0 | 38    | Repeat sectio     | 0 | 1 |
| 243 | 0 | 38    | Repeat sectio     | 0 | 1 |
| 244 | 0 | 41,14 | Primaire sectio   | 0 | 1 |
| 245 | 0 | 37,14 | Repeat sectio     | 0 | 1 |
| 246 | 0 | 37,14 | Repeat sectio     | 0 | 1 |
| 247 | 0 | 37,86 | Vaginale partus   | 1 | 1 |
| 248 | 0 | 37,86 | Vaginale partus   | 1 | 1 |
| 249 | 0 | 38    | Primaire sectio   | 1 | 1 |
| 250 | 0 | 36,86 | Secundaire sectio | 1 | 1 |
| 251 | 0 | 39,57 | Vaginale partus   | 0 | 1 |
| 252 | 0 | 39,57 | Vaginale partus   | 0 | 1 |
| 253 | 0 | 38,86 | Vaginale partus   | 0 | 1 |
| 254 | 0 | 38,86 | Vaginale partus   | 0 | 1 |
| 255 | 0 | 39,43 | Vaginale partus   | 0 | 1 |
| 256 | 0 | 39,43 | Vaginale partus   | 0 | 1 |
| 257 | 0 | 39    | Primaire sectio   | 0 | 1 |
| 258 | 0 | 37,43 | Vaginale partus   | 0 | 1 |
| 259 | 0 | 37,43 | Vaginale partus   | 0 | 1 |
| 260 | 0 | 36,72 | Vaginale partus   | 0 | 1 |
| 261 | 0 | 36,72 | Vaginale partus   | 0 | 1 |
| 262 | 0 | 36,86 | Vaginale partus   | 0 | 1 |
| 263 | 0 | 32,72 | Vaginale partus   | 0 | 1 |

|     |   |       |                   |   |   |
|-----|---|-------|-------------------|---|---|
| 264 | 0 | 32,72 | Vaginale partus   | 0 | 1 |
| 265 | 0 | 40,57 | Vaginale partus   | 0 | 1 |
| 266 | 0 | 39,72 | Vaginale partus   | 0 | 1 |
| 267 | 0 | 39,72 | Vaginale partus   | 0 | 1 |
| 268 | 0 | 40,28 | Vaginale partus   | 1 | 1 |
| 269 | 0 | 40,28 | Vaginale partus   | 1 | 1 |
| 270 | 0 | 36,43 | Secundaire sectio | 0 | 1 |
| 271 | 0 | 36,43 | Secundaire sectio | 0 | 1 |
| 272 | 0 | 39,72 | Secundaire sectio | 0 | 1 |
| 273 | 0 | 39,72 | Secundaire sectio | 0 | 1 |
| 274 | 0 | 37,43 | Vaginale partus   | 0 | 1 |
| 275 | 0 | 37,43 | Vaginale partus   | 0 | 1 |
| 276 | 0 | 41,57 | Secundaire sectio | 0 | 1 |
| 277 | 0 | 41,57 | Secundaire sectio | 0 | 1 |
| 278 | 0 | 39,14 | Vaginale partus   | 0 | 1 |
| 279 | 0 | 39,14 | Vaginale partus   | 0 | 1 |
| 280 | 0 | 39,43 | Vaginale partus   | 0 | 1 |
| 281 | 0 | 39,43 | Vaginale partus   | 0 | 1 |
| 282 | 0 | 41,14 | Vaginale partus   | 0 | 1 |
| 283 | 0 | 41,14 | Vaginale partus   | 0 | 1 |
| 284 | 0 | 38,28 | Repeat sectio     | 0 | 1 |
| 285 | 0 | 38,28 | Repeat sectio     | 0 | 1 |
| 286 | 0 | 40,14 | Vaginale partus   | 0 | 1 |
| 287 | 0 | 40,14 | Vaginale partus   | 0 | 1 |
| 288 | 0 | 39,14 | Vaginale partus   | 0 | 1 |
| 289 | 0 | 39,14 | Vaginale partus   | 0 | 1 |
| 290 | 0 | 40,72 | Vaginale partus   | 0 | 1 |
| 291 | 0 | 40,72 | Vaginale partus   | 0 | 1 |
| 292 | 0 | 40,57 | Vaginale partus   | 0 | 1 |
| 293 | 0 | 40,57 | Vaginale partus   | 0 | 1 |
| 294 | 0 | 41,14 | Vaginale partus   | 0 | 1 |
| 295 | 0 | 41,14 | Vaginale partus   | 0 | 1 |
| 296 | 0 | 39    | Vaginale partus   | 0 | 1 |

|     |   |       |                 |   |   |
|-----|---|-------|-----------------|---|---|
| 297 | 0 | 39    | Vaginale partus | 0 | 1 |
| 298 | 0 | 38,86 | Vaginale partus | 1 | 1 |
| 299 | 0 | 38,86 | Vaginale partus | 1 | 1 |
| 300 | 0 | 40,86 | Vaginale partus | 1 | 1 |
| 301 | 0 | 40,86 | Vaginale partus | 1 | 1 |
| 302 | 0 | 37,43 | Vaginale partus | 0 | 1 |
| 303 | 0 | 37,43 | Vaginale partus | 0 | 1 |
| 304 | 0 | 39,28 | Vaginale partus | 0 | 1 |
| 305 | 0 | 39,28 | Vaginale partus | 0 | 1 |
| 306 | 0 | 40,72 | Vaginale partus | 0 | 1 |
| 307 | 0 | 40,72 | Vaginale partus | 0 | 1 |
| 308 | 0 | 41,28 | Vaginale partus | 1 | 1 |
| 309 | 0 | 39,14 | Vaginale partus | 0 | 1 |
| 310 | 0 | 39,14 | Vaginale partus | 0 | 1 |
| 311 | 0 | 38,14 | Vaginale partus | 0 | 1 |
| 312 | 0 | 38,14 | Vaginale partus | 0 | 1 |
| 313 | 0 | 40,14 | Vaginale partus | 0 | 1 |
| 314 | 0 | 40,14 | Vaginale partus | 0 | 1 |
| 315 | 0 | 36,14 | Repeat sectio   | 0 | 1 |
| 316 | 0 | 36,14 | Repeat sectio   | 0 | 1 |
| 317 | 0 | 37,72 | Vaginale partus | 1 | 1 |
| 318 | 0 | 37,72 | Vaginale partus | 1 | 1 |
| 319 | 0 | 39,86 | Vaginale partus | 1 | 1 |
| 320 | 0 | 39,86 | Vaginale partus | 1 | 1 |
| 321 | 0 | 37,43 | Vaginale partus | 0 | 1 |
| 322 | 0 | 41,28 | Vaginale partus | 0 | 1 |
| 323 | 0 | 41,28 | Vaginale partus | 0 | 1 |
| 324 | 0 | 37,72 | Vaginale partus | 0 | 1 |
| 325 | 0 | 37,72 | Vaginale partus | 0 | 1 |
| 326 | 0 | 40,28 | Vaginale partus | 0 | 1 |
| 327 | 0 | 39,28 | Vaginale partus | 0 | 1 |
| 328 | 0 | 39,28 | Vaginale partus | 0 | 1 |
| 329 | 0 | 39    | Vaginale partus | 0 | 1 |

|     |   |       |                   |   |   |
|-----|---|-------|-------------------|---|---|
| 330 | 0 | 37,72 | Vaginale partus   | 0 | 1 |
| 331 | 0 | 37,72 | Vaginale partus   | 0 | 1 |
| 332 | 0 | 41,14 | Vaginale partus   | 0 | 1 |
| 333 | 0 | 41,14 | Vaginale partus   | 0 | 1 |
| 334 | 0 | 40    | Vaginale partus   | 0 | 1 |
| 335 | 0 | 40    | Vaginale partus   | 0 | 1 |
| 336 | 0 | 40,43 | Vaginale partus   | 0 | 1 |
| 337 | 0 | 40,43 | Vaginale partus   | 0 | 1 |
| 338 | 0 | 41,43 | Vaginale partus   | 0 | 1 |
| 339 | 0 | 38,28 | Repeat sectio     | 0 | 1 |
| 340 | 0 | 38,28 | Repeat sectio     | 0 | 1 |
| 341 | 0 | 40,57 | Vaginale partus   | 1 | 1 |
| 342 | 0 | 40,57 | Vaginale partus   | 1 | 1 |
| 343 | 0 | 40    | Vaginale partus   | 0 | 1 |
| 344 | 0 | 40    | Vaginale partus   | 0 | 1 |
| 345 | 0 | 38,57 | Vaginale partus   | 0 | 1 |
| 346 | 0 | 38,57 | Vaginale partus   | 0 | 1 |
| 347 | 0 | 41    | Secundaire sectio | 1 | 1 |
| 348 | 0 | 41    | Secundaire sectio | 1 | 1 |
| 349 | 0 | 41,14 | Vaginale partus   | 0 | 1 |
| 350 | 0 | 41,14 | Vaginale partus   | 0 | 1 |
| 351 | 0 | 40,57 | Vaginale partus   | 0 | 1 |
| 352 | 0 | 40,57 | Vaginale partus   | 0 | 1 |
| 353 | 0 | 40,57 | Vaginale partus   | 0 | 1 |
| 354 | 0 | 40,57 | Vaginale partus   | 0 | 1 |
| 355 | 0 | 34,57 | Vaginale partus   | 1 | 1 |
| 356 | 0 | 34,57 | Vaginale partus   | 1 | 1 |
| 357 | 0 | 40,14 | vaginaal          | 0 | 1 |
| 358 | 0 | 41,28 | vaginaal          | 0 | 1 |
| 359 | 0 | 37    | vaginaal          | 0 | 1 |
| 360 | 0 | 37    | vaginaal          | 0 | 1 |
| 361 | 0 | 40,43 | vaginaal          | 0 | 1 |
| 362 | 0 | 38,86 | prim.sectio       | 0 | 1 |

|     |   |       |                 |   |   |
|-----|---|-------|-----------------|---|---|
| 363 | 0 | 37,57 | vaginaal        | 0 | 1 |
| 364 | 0 | 39,43 | vaginaal        | 0 | 1 |
| 365 | 0 | 40,28 | vaginaal        | 0 | 1 |
| 366 | 0 | 41,57 | sec.sectio      | 0 | 1 |
| 367 | 0 | 40,28 | vaginaal        | 2 | 1 |
| 368 | 0 | 37,43 | vaginaal        | 1 | 1 |
| 369 | 0 | 39    | vaginaal        | 1 | 1 |
| 370 | 0 | 39,57 | prim.sectio     | 1 | 1 |
| 371 | 0 | 40    | prim.sectio     | 1 | 1 |
| 372 | 0 | 39,86 | vaginaal        | 0 | 1 |
| 373 | 0 | 39,72 | vaginaal        | 0 | 1 |
| 374 | 0 | 39,14 | vaginaal        | 1 | 1 |
| 375 | 0 | 38,86 | prim.sectio     | 0 | 1 |
| 376 | 0 | 40,28 | vaginaal        | 0 | 1 |
| 377 | 0 | 36    | vaginaal        | 0 | 1 |
| 378 | 0 | 40,14 | vaginaal        | 0 | 1 |
| 379 | 0 | 38,72 | vaginaal        | 1 | 1 |
| 380 | 0 | 38,57 | vaginaal        | 0 | 1 |
| 381 | 0 | 40,86 | vaginaal        | 0 | 1 |
| 382 | 0 | 38,28 | prim.sectio     | 0 | 1 |
| 383 | 0 | 41    | vaginaal        | 1 | 1 |
| 384 | 0 | 38,14 | vaginaal        | 1 | 1 |
| 385 | 0 | 39    | Vaginale partus | 0 | 1 |
| 386 | 0 | 39    | Vaginale partus | 0 | 1 |
| 387 | 0 | 41    | Vaginale partus | 0 | 1 |
| 388 | 0 | 41    | Vaginale partus | 0 | 1 |
| 389 | 0 | 40,43 | Vaginale partus | 0 | 1 |
| 390 | 0 | 40,43 | Vaginale partus | 0 | 1 |
| 391 | 0 | 40,14 | Vaginale partus | 0 | 1 |
| 392 | 0 | 40,14 | Vaginale partus | 0 | 1 |
| 393 | 0 | 39,57 | Vaginale partus | 2 | 1 |
| 394 | 0 | 39,57 | Vaginale partus | 2 | 1 |
| 395 | 0 | 37,14 | Vaginale partus | 0 | 1 |

|     |   |       |                 |   |   |
|-----|---|-------|-----------------|---|---|
| 396 | 0 | 37,14 | Vaginale partus | 0 | 1 |
| 397 | 0 | 40,14 | Vaginale partus | 0 | 1 |
| 398 | 0 | 40,14 | Vaginale partus | 0 | 1 |
| 399 | 0 | 39,57 | Vaginale partus | 0 | 1 |
| 400 | 0 | 39,57 | Vaginale partus | 0 | 1 |
| 401 | 0 | 40,43 | Vaginale partus | 0 | 1 |
| 402 | 0 | 39,43 | Vaginale partus | 1 | 1 |
| 403 | 0 | 39,43 | Vaginale partus | 1 | 1 |
| 404 | 0 | 37,43 | Vaginale partus | 0 | 1 |
| 405 | 0 | 40,14 | vaginaal        | 0 | 1 |
| 406 | 0 | 41,14 | vaginaal        | 0 | 1 |
| 407 | 0 | 39,86 | vaginaal        | 0 | 1 |
| 408 | 0 | 38,28 | vaginaal        | 0 | 1 |
| 409 | 0 | 40    | vaginaal        | 0 | 1 |
| 410 | 0 | 38,57 | sec.sectio      | 0 | 1 |
| 411 | 0 | 39,43 | vaginaal        | 1 | 1 |
| 412 | 0 | 40,57 | vaginaal        | 0 | 1 |
| 413 | 0 | 40    | vaginaal        | 0 | 1 |
| 414 | 0 | 41,14 | sec.sectio      | 0 | 1 |
| 415 | 0 | 35,57 | vaginaal        | 1 | 1 |
| 416 | 0 | 30,57 | vaginaal        | 0 | 1 |
| 417 | 0 | 41    | Vaginale partus | 0 | 1 |
| 418 | 0 | 40,28 | Vaginale partus | 0 | 1 |
| 419 | 0 | 40,28 | Vaginale partus | 0 | 1 |
| 420 | 0 | 39,86 | vaginaal        | 0 | 1 |
| 421 | 0 | 41,57 | Vaginale partus | 0 | 1 |
| 422 | 0 | 41,57 | Vaginale partus | 0 | 1 |
| 423 | 0 | 38    | vaginaal        | 0 | 1 |
| 424 | 0 | 38,86 | Primaire sectio | 0 | 1 |
| 425 | 0 | 38,86 | Primaire sectio | 0 | 1 |
| 426 | 0 | 37,14 | vaginaal        | 0 | 1 |
| 427 | 0 | 37,28 | vaginaal        | 0 | 1 |
| 428 | 0 | 39,28 | vaginaal        | 0 | 1 |



|     |   |       |                 |   |   |
|-----|---|-------|-----------------|---|---|
| 429 | 0 | 38    | sec.sectio      | 0 | 1 |
| 430 | 0 | 40,57 | Vaginale partus | 0 | 1 |
| 431 | 0 | 40,57 | Vaginale partus | 0 | 1 |
| 432 | 0 | 39,86 | vaginaal        | 0 | 1 |
| 433 | 0 | 39,57 | Vaginale partus | 0 | 1 |
| 434 | 0 | 39,57 | Vaginale partus | 0 | 1 |
| 435 | 0 | 41,14 | vaginaal        | 2 | 1 |
| 436 | 0 | 38,72 | vaginaal        | 0 | 1 |
| 437 | 0 | 41    | sec.sectio      | 1 | 1 |
| 438 | 0 | 37,43 | Repeat sectio   | 1 | 1 |
| 439 | 0 | 37,43 | Repeat sectio   | 1 | 1 |
| 440 | 0 | 41,14 | Vaginale partus | 0 | 1 |
| 441 | 0 | 41,14 | Vaginale partus | 0 | 1 |
| 442 | 0 | 41,43 | Vaginale partus | 0 | 1 |
| 443 | 0 | 41,43 | Vaginale partus | 0 | 1 |
| 444 | 0 | 41    | Vaginale partus | 0 | 1 |
| 445 | 0 | 41    | Vaginale partus | 0 | 1 |
| 446 | 0 | 38,57 | Primaire sectio | 0 | 1 |
| 447 | 0 | 38,57 | Primaire sectio | 0 | 1 |
| 448 | 0 | 39,72 | vaginaal        | 1 | 1 |
| 449 | 0 | 40,57 |                 | 0 | 1 |
| 450 | 0 | 39,43 | Vaginale partus | 0 | 1 |
| 451 | 0 | 39,43 | Vaginale partus | 0 | 1 |
| 452 | 0 | 40,14 | vaginaal        | 0 | 1 |
| 453 | 0 | 40,14 | Vaginale partus | 0 | 1 |
| 454 | 0 | 40,14 | Vaginale partus | 0 | 1 |
| 455 | 0 | 40,14 | Vaginale partus | 0 | 1 |
| 456 | 0 | 40,14 | Vaginale partus | 0 | 1 |
| 457 | 0 | 40,28 | Vaginale partus | 0 | 1 |
| 458 | 0 | 41    | vaginaal        | 0 | 1 |
| 459 | 0 | 40    | Vaginale partus | 0 | 1 |
| 460 | 0 | 40    | Vaginale partus | 0 | 1 |
| 461 | 0 | 38,43 | Vaginale partus | 1 | 1 |

|     |   |       |                   |   |   |
|-----|---|-------|-------------------|---|---|
| 462 | 0 | 38,43 | Vaginale partus   | 1 | 1 |
| 463 | 0 | 38,57 | Vaginale partus   | 0 | 1 |
| 464 | 0 | 38,57 | Vaginale partus   | 0 | 1 |
| 465 | 0 | 40,28 | Vaginale partus   | 0 | 1 |
| 466 | 0 | 40,28 | Vaginale partus   | 0 | 1 |
| 467 | 0 | 41,43 | Secundaire sectio | 0 | 1 |
| 468 | 0 | 40,57 | Vaginale partus   | 0 | 1 |
| 469 | 0 | 40,57 | Vaginale partus   | 0 | 1 |
| 470 | 0 | 39,43 | Vaginale partus   | 0 | 1 |
| 471 | 0 | 39,43 | Vaginale partus   | 0 | 1 |
| 472 | 0 | 37,14 | Primaire sectio   | 0 | 1 |
| 473 | 0 | 37,14 | Primaire sectio   | 0 | 1 |
| 474 | 0 | 39    | Vaginale partus   | 0 | 1 |
| 475 | 0 | 39    | Vaginale partus   | 0 | 1 |
| 476 | 0 | 39,14 | Primaire sectio   | 0 | 1 |
| 477 | 0 | 38,43 | Vaginale partus   | 0 | 1 |
| 478 | 0 | 38,43 | Vaginale partus   | 0 | 1 |
| 479 | 0 | 39,14 | Primaire sectio   | 0 | 1 |
| 480 | 0 | 40,28 | vaginaal          | 0 | 1 |
| 481 | 0 | 39,14 | Vaginale partus   | 0 | 1 |
| 482 | 0 | 41,14 | Vaginale partus   | 0 | 1 |
| 483 | 0 | 39,14 | Vaginale partus   | 0 | 1 |
| 484 | 0 | 39,28 | vaginaal          | 0 | 1 |
| 485 | 0 | 40    | Vaginale partus   | 0 | 1 |
| 486 | 0 | 39,43 | vaginaal          | 0 | 1 |
| 487 | 0 | 40    | Vaginale partus   | 0 | 1 |
| 488 | 0 | 40,86 | Vaginale partus   | 0 | 1 |
| 489 | 0 | 40,86 | Vaginale partus   | 0 | 1 |
| 490 | 0 | 39,14 | Vaginale partus   | 0 | 1 |
| 491 | 0 | 39,14 | Vaginale partus   | 0 | 1 |
| 492 | 0 | 39,43 | Vaginale partus   | 0 | 1 |
| 493 | 0 | 39,43 | Vaginale partus   | 0 | 1 |
| 494 | 0 | 41,14 | Vaginale partus   | 0 | 1 |

|     |   |       |                 |   |   |
|-----|---|-------|-----------------|---|---|
| 495 | 0 | 39    | Vaginale partus | 0 | 1 |
| 496 | 0 | 39,86 | Vaginale partus | 0 | 1 |
| 497 | 0 | 40,28 | Vaginale partus | 0 | 1 |
| 498 | 0 | 41,14 | Vaginale partus | 0 | 1 |
| 499 | 0 | 39,86 | Vaginale partus | 0 | 1 |
| 500 | 0 | 39    | Vaginale partus | 0 | 1 |
| 501 | 0 | 40,28 | Vaginale partus | 0 | 1 |
| 502 | 0 | 38,57 | Vaginale partus | 0 | 1 |
| 503 | 0 | 40,57 | Vaginale partus | 0 | 1 |
| 504 | 0 | 40,57 | Vaginale partus | 0 | 1 |
| 505 | 0 | 38,57 | Vaginale partus | 0 | 1 |
| 506 | 0 | 40,57 | Vaginale partus | 0 | 1 |
| 507 | 0 | 40,57 | Vaginale partus | 0 | 1 |
| 508 | 0 | 39,14 | Vaginale partus | 0 | 1 |
| 509 | 0 | 39,14 | Vaginale partus | 0 | 1 |
| 510 | 0 | 38,28 | sec.sectio      | 0 | 1 |
| 511 | 0 | 39,86 | Vaginale partus | 0 | 1 |
| 512 | 0 | 39,86 | Vaginale partus | 0 | 1 |
| 513 | 0 | 40,72 | Vaginale partus | 0 | 1 |
| 514 | 0 | 40,72 | Vaginale partus | 0 | 1 |
| 515 | 0 | 39,14 | Vaginale partus | 0 | 1 |
| 516 | 0 | 39,14 | Vaginale partus | 0 | 1 |
| 517 | 0 | 39,72 | vaginaal        | 0 | 1 |
| 518 | 0 | 38,72 | Vaginale partus | 0 | 1 |
| 519 | 0 | 37,72 | Vaginale partus | 0 | 1 |
| 520 | 0 | 37,72 | Vaginale partus | 0 | 1 |
| 521 | 0 | 40    | Vaginale partus | 0 | 1 |
| 522 | 0 | 40    | Vaginale partus | 0 | 1 |
| 523 | 0 | 40    | Vaginale partus | 0 | 1 |
| 524 | 0 | 40    | Vaginale partus | 0 | 1 |
| 525 | 0 | 40,28 | Vaginale partus | 0 | 1 |
| 526 | 0 | 38,43 | Vaginale partus | 0 | 1 |
| 527 | 0 | 41,28 | vaginaal        | 0 | 1 |

|     |   |       |                   |   |   |
|-----|---|-------|-------------------|---|---|
| 528 | 0 | 40,28 | Vaginale partus   | 0 | 1 |
| 529 | 0 | 38,43 | Vaginale partus   | 0 | 1 |
| 530 | 0 | 38,43 | Vaginale partus   | 0 | 1 |
| 531 | 0 | 41,57 | Vaginale partus   | 0 | 1 |
| 532 | 0 | 38,43 | Vaginale partus   | 0 | 1 |
| 533 | 0 | 41,57 | Vaginale partus   | 0 | 1 |
| 534 | 0 | 40,57 | Vaginale partus   | 0 | 1 |
| 535 | 0 | 39,72 | Vaginale partus   | 0 | 1 |
| 536 | 0 | 39,72 | Vaginale partus   | 0 | 1 |
| 537 | 0 | 39,57 | vaginaal          | 0 | 1 |
| 538 | 0 | 40,57 | Vaginale partus   | 0 | 1 |
| 539 | 0 | 39,14 | vaginaal          | 0 | 1 |
| 540 | 0 | 40,57 | Vaginale partus   | 0 | 1 |
| 541 | 0 | 40,28 | vaginaal          | 0 | 1 |
| 542 | 0 | 39,86 | vaginaal          | 0 | 1 |
| 543 | 0 | 39,43 | Vaginale partus   | 0 | 1 |
| 544 | 0 | 39,43 | Vaginale partus   | 0 | 1 |
| 545 | 0 | 37,72 | Vaginale partus   | 0 | 1 |
| 546 | 0 | 37,72 | Vaginale partus   | 0 | 1 |
| 547 | 0 | 37,14 | vaginaal          | 0 | 1 |
| 548 | 0 | 41,43 | vaginaal          | 0 | 1 |
| 549 | 0 | 41,14 | vaginaal          | 0 | 1 |
| 550 | 0 | 40,28 | Vaginale partus   | 0 | 1 |
| 551 | 0 | 39,43 | vaginaal          | 0 | 1 |
| 552 | 0 | 40,28 | Vaginale partus   | 0 | 1 |
| 553 | 0 | 40,57 | Secundaire sectio | 0 | 1 |
| 554 | 0 | 40,57 | Secundaire sectio | 0 | 1 |
| 555 | 0 | 40    | Vaginale partus   | 0 | 1 |
| 556 | 0 | 40    | Vaginale partus   | 0 | 1 |
| 557 | 0 | 39,57 | vaginaal          | 0 | 1 |
| 558 | 0 | 39,14 | Vaginale partus   | 0 | 1 |
| 559 | 0 | 39,28 | Secundaire sectio | 0 | 1 |
| 560 | 0 | 39,28 | Secundaire sectio | 0 | 1 |

|     |   |       |                   |   |   |
|-----|---|-------|-------------------|---|---|
| 561 | 0 | 40,28 | Vaginale partus   | 0 | 1 |
| 562 | 0 | 40,28 | Vaginale partus   | 0 | 1 |
| 563 | 0 | 41,14 | Vaginale partus   | 0 | 1 |
| 564 | 0 | 41,14 | Vaginale partus   | 0 | 1 |
| 565 | 0 | 38,86 | Vaginale partus   | 0 | 1 |
| 566 | 0 | 39    | Vaginale partus   | 0 | 1 |
| 567 | 0 | 38,86 | Vaginale partus   | 0 | 1 |
| 568 | 0 | 39    | Vaginale partus   | 0 | 1 |
| 569 | 0 | 38,72 | vaginaal          | 0 | 1 |
| 570 | 0 | 41,28 | Vaginale partus   | 0 | 1 |
| 571 | 0 | 39,28 | vaginaal          | 0 | 1 |
| 572 | 0 | 41,28 | Vaginale partus   | 0 | 1 |
| 573 | 0 | 39,14 | vaginaal          | 0 | 1 |
| 574 | 0 | 41,14 | Secundaire sectio | 0 | 1 |
| 575 | 0 | 41    | Vaginale partus   | 0 | 1 |
| 576 | 0 | 41,14 | Secundaire sectio | 0 | 1 |
| 577 | 0 | 39,57 | Vaginale partus   | 0 | 1 |
| 578 | 0 | 41    | Vaginale partus   | 0 | 1 |
| 579 | 0 | 39,86 | Vaginale partus   | 0 | 1 |
| 580 | 0 | 39,86 | Vaginale partus   | 0 | 1 |
| 581 | 0 | 39,57 | Vaginale partus   | 0 | 1 |
| 582 | 0 | 39,86 | Vaginale partus   | 0 | 1 |
| 583 | 0 | 39,86 | Vaginale partus   | 0 | 1 |
| 584 | 0 | 40,57 | Secundaire sectio | 0 | 1 |
| 585 | 0 | 40,57 | Secundaire sectio | 0 | 1 |
| 586 | 0 | 40,57 | Secundaire sectio | 0 | 1 |
| 587 | 0 | 39,86 | Vaginale partus   | 0 | 1 |
| 588 | 0 | 39,86 | Vaginale partus   | 0 | 1 |
| 589 | 0 | 41    | Vaginale partus   | 0 | 1 |
| 590 | 0 | 40,57 | Vaginale partus   | 0 | 1 |
| 591 | 0 | 40,57 | Vaginale partus   | 0 | 1 |
| 592 | 0 | 39,57 | Vaginale partus   | 0 | 1 |
| 593 | 0 | 38,72 | Primaire sectio   | 0 | 1 |

|     |   |       |                 |   |   |
|-----|---|-------|-----------------|---|---|
| 594 | 0 | 37,43 | Vaginale partus | 0 | 1 |
| 595 | 0 | 37,43 | Vaginale partus | 0 | 1 |
| 596 | 0 | 40    | Vaginale partus | 0 | 1 |
| 597 | 0 | 41    | Vaginale partus | 0 | 1 |
| 598 | 0 | 39,57 | Vaginale partus | 0 | 1 |
| 599 | 0 | 40,86 | Vaginale partus | 0 | 1 |
| 600 | 0 | 38,72 | Primaire sectio | 0 | 1 |
| 601 | 0 | 39,57 | Vaginale partus | 0 | 1 |
| 602 | 0 | 40,86 | Vaginale partus | 0 | 1 |
| 603 | 0 | 39,57 | Vaginale partus | 0 | 1 |
| 604 | 0 | 38,57 | Vaginale partus | 0 | 1 |
| 605 | 0 | 40,14 | Vaginale partus | 0 | 1 |
| 606 | 0 | 40,86 | Vaginale partus | 0 | 1 |
| 607 | 0 | 38,57 | Vaginale partus | 0 | 1 |
| 608 | 0 | 40,14 | Vaginale partus | 0 | 1 |
| 609 | 0 | 39    | vaginaal        | 0 | 1 |
| 610 | 0 | 40,86 | Vaginale partus | 0 | 1 |
| 611 | 0 | 40,43 | Vaginale partus | 0 | 1 |
| 612 | 0 | 40,43 | Vaginale partus | 0 | 1 |
| 613 | 0 | 41,14 | Vaginale partus | 0 | 1 |
| 614 | 0 | 41,14 | Vaginale partus | 0 | 1 |
| 615 | 0 | 37,57 | Vaginale partus | 0 | 1 |
| 616 | 0 | 41,14 | Vaginale partus | 0 | 1 |
| 617 | 0 | 39,14 | Repeat sectio   | 0 | 1 |
| 618 | 0 | 39,14 | Repeat sectio   | 0 | 1 |
| 619 | 0 | 37,57 | Vaginale partus | 0 | 1 |
| 620 | 0 | 40,14 | Vaginale partus | 0 | 1 |
| 621 | 0 | 39,57 | Vaginale partus | 0 | 1 |
| 622 | 0 | 36,86 | Vaginale partus | 0 | 1 |
| 623 | 0 | 39,57 | Vaginale partus | 0 | 1 |
| 624 | 0 | 38,14 | Vaginale partus | 0 | 1 |
| 625 | 0 | 38,14 | Vaginale partus | 0 | 1 |
| 626 | 0 | 40,43 | vaginaal        | 0 | 1 |

|     |   |       |                   |   |   |
|-----|---|-------|-------------------|---|---|
| 627 | 0 | 36,86 | Vaginale partus   | 0 | 1 |
| 628 | 0 | 37,72 | Repeat sectio     | 0 | 1 |
| 629 | 0 | 40,14 | Secundaire sectio | 0 | 1 |
| 630 | 0 | 41,28 | vaginaal          | 0 | 1 |
| 631 | 0 | 40,14 | Secundaire sectio | 0 | 1 |
| 632 | 0 | 37,72 | Repeat sectio     | 0 | 1 |
| 633 | 0 | 37,72 | Repeat sectio     | 0 | 1 |
| 634 | 0 | 39,43 | Vaginale partus   | 0 | 1 |
| 635 | 0 | 39,72 | Vaginale partus   | 0 | 1 |
| 636 | 0 | 39,43 | Vaginale partus   | 0 | 1 |
| 637 | 0 | 38,72 | Vaginale partus   | 0 | 1 |
| 638 | 0 | 38,72 | Vaginale partus   | 0 | 1 |
| 639 | 0 | 39,86 | Primaire sectio   | 0 | 1 |
| 640 | 0 | 40,43 | Vaginale partus   | 0 | 1 |
| 641 | 0 | 39,86 | Primaire sectio   | 0 | 1 |
| 642 | 0 | 40,43 | Vaginale partus   | 0 | 1 |
| 643 | 0 | 39    |                   | 0 | 1 |
| 644 | 0 | 39,14 | Vaginale partus   | 0 | 1 |
| 645 | 0 | 39,14 | Vaginale partus   | 0 | 1 |
| 646 | 0 | 39,72 | Vaginale partus   | 0 | 1 |
| 647 | 0 | 39,72 | Vaginale partus   | 0 | 1 |
| 648 | 0 | 40,86 | Vaginale partus   | 0 | 1 |
| 649 | 0 | 40,86 | Vaginale partus   | 0 | 1 |
| 650 | 0 | 40    | vaginaal          | 0 | 1 |
| 651 | 0 | 39,57 | Vaginale partus   | 0 | 1 |
| 652 | 0 | 39,43 | Vaginale partus   | 0 | 1 |
| 653 | 0 | 39,43 | Vaginale partus   | 0 | 1 |
| 654 | 0 | 39,57 | Secundaire sectio | 0 | 1 |
| 655 | 0 | 39,57 | Secundaire sectio | 0 | 1 |
| 656 | 0 | 39,14 | vaginaal          | 0 | 1 |
| 657 | 0 | 40,86 | Repeat sectio     | 0 | 1 |
| 658 | 0 | 39,43 | Repeat sectio     | 0 | 1 |
| 659 | 0 | 39,43 | Repeat sectio     | 0 | 1 |

|     |   |       |                   |   |   |
|-----|---|-------|-------------------|---|---|
| 660 | 0 | 40,72 | vaginaal          | 0 | 1 |
| 661 | 0 | 38,28 | Vaginale partus   | 0 | 1 |
| 662 | 0 | 38,28 | Vaginale partus   | 0 | 1 |
| 663 | 0 | 41,28 | Vaginale partus   | 0 | 1 |
| 664 | 0 | 41,28 | Vaginale partus   | 0 | 1 |
| 665 | 0 | 39,28 | vaginaal          | 0 | 1 |
| 666 | 0 | 40,43 | Vaginale partus   | 0 | 1 |
| 667 | 0 | 40,43 | Vaginale partus   | 0 | 1 |
| 668 | 0 | 40,14 | Vaginale partus   | 0 | 1 |
| 669 | 0 | 40,14 | Vaginale partus   | 0 | 1 |
| 670 | 0 | 40,57 | vaginaal          | 0 | 1 |
| 671 | 0 | 41,28 | Secundaire sectio | 0 | 1 |
| 672 | 0 | 41,28 | Secundaire sectio | 0 | 1 |
| 673 | 0 | 40,14 | vaginaal          | 0 | 1 |
| 674 | 0 | 40,57 | Vaginale partus   | 0 | 1 |
| 675 | 0 | 40,57 | Vaginale partus   | 0 | 1 |
| 676 | 0 | 40,86 | Vaginale partus   | 0 | 1 |
| 677 | 0 | 39,57 | Vaginale partus   | 0 | 1 |
| 678 | 0 | 41,28 | Vaginale partus   | 0 | 1 |
| 679 | 0 | 41,28 | Vaginale partus   | 0 | 1 |
| 680 | 0 | 38,72 | vaginaal          | 0 | 1 |
| 681 | 0 | 38,57 | Primaire sectio   | 0 | 1 |
| 682 | 0 | 40,28 | vaginaal          | 0 | 1 |
| 683 | 0 | 40,14 | Vaginale partus   | 0 | 1 |
| 684 | 0 | 40,14 | Vaginale partus   | 0 | 1 |
| 685 | 0 | 38,57 | Repeat sectio     | 0 | 1 |
| 686 | 0 | 38,57 | Repeat sectio     | 0 | 1 |
| 687 | 0 | 40,43 | Vaginale partus   | 0 | 1 |
| 688 | 0 | 40,43 | Vaginale partus   | 0 | 1 |
| 689 | 0 | 39,57 | vaginaal          | 0 | 1 |
| 690 | 0 | 38,57 | Vaginale partus   | 0 | 1 |
| 691 | 0 | 38,57 | Vaginale partus   | 0 | 1 |
| 692 | 0 | 39,86 | Secundaire sectio | 0 | 1 |



|     |   |       |                   |   |   |
|-----|---|-------|-------------------|---|---|
| 693 | 0 | 39,86 | Secundaire sectio | 0 | 1 |
| 694 | 0 | 39,86 | Secundaire sectio | 0 | 1 |
| 695 | 0 | 40    | vaginaal          | 0 | 1 |
| 696 | 0 | 39,28 | vaginaal          | 0 | 1 |
| 697 | 0 | 38,57 | Vaginale partus   | 0 | 1 |
| 698 | 0 | 38,72 | Vaginale partus   | 0 | 1 |
| 699 | 0 | 38,72 | Vaginale partus   | 0 | 1 |
| 700 | 0 | 39,43 | Vaginale partus   | 0 | 1 |
| 701 | 0 | 39,43 | Vaginale partus   | 0 | 1 |
| 702 | 0 | 39,14 | sec.sectio        | 0 | 1 |
| 703 | 0 | 41,14 | vaginaal          | 0 | 1 |
| 704 | 0 | 38    | vaginaal          | 0 | 1 |
| 705 | 1 | 39    | vaginaal          | 0 | 1 |
| 706 | 0 | 39,72 | vaginaal          | 0 | 1 |
| 707 | 0 | 40,43 | vaginaal          | 0 | 1 |
| 708 | 0 | 41    | vaginaal          | 0 | 1 |
| 709 | 0 | 38,72 | vaginaal          | 0 | 1 |
| 710 | 0 | 39,43 | vaginaal          | 0 | 1 |
| 711 | 0 | 40,72 | vaginaal          | 0 | 1 |
| 712 | 0 | 39,28 | vaginaal          | 0 | 1 |
| 713 | 0 | 39,86 | vaginaal          | 0 | 1 |
| 714 | 0 | 40,43 | prim.sectio       | 0 | 1 |
| 715 | 0 | 37,57 | vaginaal          | 0 | 1 |
| 716 | 0 | 40,14 | vaginaal          | 0 | 1 |
| 717 | 0 | 40    | Vaginale partus   | 0 | 1 |
| 718 | 0 | 40    | Vaginale partus   | 0 | 1 |
| 719 | 0 | 39,57 | vaginaal          | 0 | 1 |
| 720 | 0 | 39,86 | vaginaal          | 0 | 1 |
| 721 | 0 | 38,86 | vaginaal          | 0 | 1 |
| 722 | 0 | 39,86 | vaginaal          | 0 | 1 |
| 723 | 0 | 40,28 | vaginaal          | 0 | 1 |
| 724 | 0 | 37,72 | vaginaal          | 0 | 1 |
| 725 | 0 | 39,28 | vaginaal          | 0 | 1 |

|     |   |       |                 |   |   |
|-----|---|-------|-----------------|---|---|
| 726 | 0 | 41,28 | vaginaal        | 0 | 1 |
| 727 | 0 | 38,72 | vaginaal        | 0 | 1 |
| 728 | 0 | 38,86 | vaginaal        | 0 | 1 |
| 729 | 0 | 41,72 | vaginaal        | 0 | 1 |
| 730 | 0 | 41    | vaginaal        | 0 | 1 |
| 731 | 0 | 38,43 | prim.sectio     | 0 | 1 |
| 732 | 0 | 38,14 | vaginaal        | 0 | 1 |
| 733 | 0 | 38    | Vaginale partus | 0 | 1 |
| 734 | 0 | 38    | Vaginale partus | 0 | 1 |
| 735 | 0 | 41,14 | Vaginale partus | 0 | 1 |
| 736 | 0 | 41,14 | Vaginale partus | 0 | 1 |
| 737 | 0 | 37,57 | vaginaal        | 0 | 1 |
| 738 | 0 | 39,86 | Vaginale partus | 0 | 1 |
| 739 | 0 | 40,86 | Vaginale partus | 0 | 1 |
| 740 | 0 | 40,86 | Vaginale partus | 0 | 1 |
| 741 | 0 | 37,43 | vaginaal        | 0 | 1 |
| 742 | 0 | 41    | Vaginale partus | 0 | 1 |
| 743 | 0 | 41    | Vaginale partus | 0 | 1 |
| 744 | 0 | 41,43 | vaginaal        | 0 | 1 |
| 745 | 0 | 41,28 | sectio          | 0 | 1 |
| 746 | 0 | 41,43 | vaginaal        | 0 | 1 |
| 747 | 0 | 38,57 | Vaginale partus | 0 | 1 |
| 748 | 0 | 38,57 | Vaginale partus | 0 | 1 |
| 749 | 0 | 39    | Vaginale partus | 0 | 1 |
| 750 | 0 | 39    | Vaginale partus | 0 | 1 |
| 751 | 1 | 38,14 | prim.sectio     | 0 | 1 |
| 752 | 0 | 39,72 | vaginaal        | 0 | 1 |
| 753 | 0 | 40,14 | prim.sectio     | 0 | 1 |
| 754 | 0 | 38,72 | vaginaal        | 0 | 1 |
| 755 | 0 | 41,57 | prim.sectio     | 0 | 1 |
| 756 | 0 | 39    | Repeat sectio   | 0 | 1 |
| 757 | 0 | 39    | Repeat sectio   | 0 | 1 |
| 758 | 0 | 39    | Repeat sectio   | 0 | 1 |

|     |   |       |                   |   |   |
|-----|---|-------|-------------------|---|---|
| 759 | 0 | 39    | Repeat sectio     | 0 | 1 |
| 760 | 0 | 38,43 | Vaginale partus   | 0 | 1 |
| 761 | 0 | 38,43 | Vaginale partus   | 0 | 1 |
| 762 | 0 | 37,57 | Secundaire sectio | 0 | 1 |
| 763 | 0 | 37,57 | Secundaire sectio | 0 | 1 |
| 764 | 0 | 39,28 | Vaginale partus   | 0 | 1 |
| 765 | 0 | 39,28 | Vaginale partus   | 0 | 1 |
| 766 | 0 | 40,86 | Vaginale partus   | 0 | 1 |
| 767 | 0 | 40,86 | Vaginale partus   | 0 | 1 |
| 768 | 0 | 38,43 | Vaginale partus   | 0 | 1 |
| 769 | 0 | 38,43 | Vaginale partus   | 0 | 1 |
| 770 | 0 | 39,86 | Vaginale partus   | 0 | 1 |
| 771 | 0 | 39,86 | Vaginale partus   | 0 | 1 |
| 772 | 0 | 40    | Vaginale partus   | 0 | 1 |
| 773 | 0 | 40    | Vaginale partus   | 0 | 1 |
| 774 | 0 | 40,28 | Vaginale partus   | 0 | 1 |
| 775 | 0 | 40,28 | Vaginale partus   | 0 | 1 |
| 776 | 0 | 40,14 | vaginaal          | 0 | 1 |
| 777 | 0 | 41,72 | vaginaal          | 0 | 1 |
| 778 | 0 | 38,86 | vaginaal          | 0 | 1 |
| 779 | 0 | 40,43 | Vaginale partus   | 0 | 1 |
| 780 | 0 | 40,43 | Vaginale partus   | 0 | 1 |
| 781 | 0 | 41,28 | Vaginale partus   | 0 | 1 |
| 782 | 0 | 41,28 | Vaginale partus   | 0 | 1 |
| 783 | 0 | 40    | Vaginale partus   | 0 | 1 |
| 784 | 0 | 39,28 | Vaginale partus   | 0 | 1 |
| 785 | 0 | 40    | Vaginale partus   | 0 | 1 |
| 786 | 0 | 37,86 | Vaginale partus   | 0 | 1 |
| 787 | 0 | 37,86 | Vaginale partus   | 0 | 1 |
| 788 | 0 | 39,43 | vaginaal          | 0 | 1 |
| 789 | 0 | 40,43 | Vaginale partus   | 0 | 1 |
| 790 | 0 | 40,43 | Vaginale partus   | 0 | 1 |
| 791 | 0 | 38,28 | Vaginale partus   | 0 | 1 |

|     |   |       |                   |   |   |
|-----|---|-------|-------------------|---|---|
| 792 | 0 | 38,28 | Vaginale partus   | 0 | 1 |
| 793 | 0 | 41,28 | vaginaal          | 0 | 1 |
| 794 | 0 | 38,86 | Primaire sectio   | 0 | 1 |
| 795 | 0 | 38,86 | Primaire sectio   | 0 | 1 |
| 796 | 0 | 39,43 | Vaginale partus   | 0 | 1 |
| 797 | 0 | 39,43 | Vaginale partus   | 0 | 1 |
| 798 | 0 | 41,28 | Secundaire sectio | 0 | 1 |
| 799 | 0 | 41,28 | Secundaire sectio | 0 | 1 |
| 800 | 0 | 41,43 | Repeat sectio     | 0 | 1 |
| 801 | 0 | 41,43 | Repeat sectio     | 0 | 1 |
| 802 | 0 | 38,43 | Vaginale partus   | 0 | 1 |
| 803 | 0 | 38,43 | Vaginale partus   | 0 | 1 |
| 804 | 0 | 38,86 | Vaginale partus   | 0 | 1 |
| 805 | 0 | 38,86 | Vaginale partus   | 0 | 1 |
| 806 | 0 | 40,57 | Vaginale partus   | 0 | 1 |
| 807 | 0 | 40,57 | Vaginale partus   | 0 | 1 |
| 808 | 0 | 39,72 | vaginaal          | 0 | 1 |
| 809 | 0 | 40,28 | Secundaire sectio | 0 | 1 |
| 810 | 0 | 40,28 | Secundaire sectio | 0 | 1 |
| 811 | 0 | 41    | Vaginale partus   | 0 | 1 |
| 812 | 0 | 41    | Vaginale partus   | 0 | 1 |
| 813 | 0 | 40,43 | vaginaal          | 0 | 1 |
| 814 | 0 | 38,57 | Vaginale partus   | 0 | 1 |
| 815 | 0 | 38,57 | Vaginale partus   | 0 | 1 |
| 816 | 0 | 39,72 | Vaginale partus   | 0 | 1 |
| 817 | 0 | 40    | Vaginale partus   | 0 | 1 |
| 818 | 0 | 40    | Vaginale partus   | 0 | 1 |
| 819 | 0 | 40    | Vaginale partus   | 0 | 1 |
| 820 | 0 | 39,57 | Vaginale partus   | 0 | 1 |
| 821 | 0 | 39,57 | Vaginale partus   | 0 | 1 |
| 822 | 0 | 39,86 | vaginaal          | 0 | 1 |
| 823 | 0 | 39,43 | vaginaal          | 0 | 1 |
| 824 | 0 | 41,14 | Vaginale partus   | 0 | 1 |

|     |   |       |                   |   |   |
|-----|---|-------|-------------------|---|---|
| 825 | 0 | 41,43 | Secundaire sectio | 2 | 1 |
| 826 | 0 | 41,43 | Secundaire sectio | 2 | 1 |
| 827 | 0 | 41,43 | Secundaire sectio | 2 | 1 |
| 828 | 1 | 40,14 | prim.sectio       | 2 | 1 |
| 829 | 0 | 38,57 | Primaire sectio   | 1 | 1 |
| 830 | 0 | 37,86 | vaginaal          | 1 | 1 |
| 831 | 0 | 41,43 | Secundaire sectio | 1 | 1 |
| 832 | 0 | 41,43 | Secundaire sectio | 1 | 1 |
| 833 | 0 | 40,14 | Secundaire sectio | 1 | 1 |
| 834 | 0 | 40,14 | Secundaire sectio | 1 | 1 |
| 835 | 0 | 39,86 | vaginaal          | 1 | 1 |
| 836 | 0 | 40,57 | vaginaal          | 1 | 1 |
| 837 | 0 | 40    | Secundaire sectio | 1 | 1 |
| 838 | 0 | 40    | Secundaire sectio | 1 | 1 |
| 839 | 0 | 41    | Vaginale partus   | 1 | 1 |
| 840 | 0 | 41    | Vaginale partus   | 1 | 1 |
| 841 | 0 | 37,28 | Vaginale partus   | 1 | 1 |
| 842 | 0 | 37,28 | Vaginale partus   | 1 | 1 |
| 843 | 0 | 41    | Vaginale partus   | 1 | 1 |
| 844 | 0 | 41    | Vaginale partus   | 1 | 1 |
| 845 | 0 | 41    | Repeat sectio     | 1 | 1 |
| 846 | 0 | 41    | Repeat sectio     | 1 | 1 |
| 847 | 0 | 38    | Primaire sectio   | 0 | 1 |
| 848 | 0 | 38    | Primaire sectio   | 0 | 1 |
| 849 | 0 | 39,28 | Primaire sectio   | 0 | 1 |
| 850 | 0 | 39,28 | Primaire sectio   | 0 | 1 |
| 851 | 0 | 38,86 | Primaire sectio   | 0 | 1 |
| 852 | 0 | 38,86 | Primaire sectio   | 0 | 1 |
| 853 | 0 | 40,43 | vaginaal          | 0 | 1 |
| 854 | 0 | 38,72 | Repeat sectio     | 2 | 1 |
| 855 | 0 | 38,72 | Repeat sectio     | 2 | 1 |
| 856 | 0 | 40,86 | vaginaal          | 0 | 1 |
| 857 | 0 | 39,28 | Vaginale partus   | 1 | 1 |

|     |   |       |                   |   |   |
|-----|---|-------|-------------------|---|---|
| 858 | 0 | 39,28 | Vaginale partus   | 1 | 1 |
| 859 | 0 | 41,14 | Vaginale partus   | 1 | 1 |
| 860 | 0 | 41,14 | Vaginale partus   | 1 | 1 |
| 861 | 0 | 40,57 | Vaginale partus   | 1 | 1 |
| 862 | 0 | 40,57 | Vaginale partus   | 1 | 1 |
| 863 | 0 | 40,57 | Vaginale partus   | 1 | 1 |
| 864 | 0 | 38,86 | Vaginale partus   | 1 | 1 |
| 865 | 0 | 38,86 | Vaginale partus   | 1 | 1 |
| 866 | 0 | 40,57 | Vaginale partus   | 1 | 1 |
| 867 | 0 | 40,57 | Vaginale partus   | 1 | 1 |
| 868 | 0 | 39,72 | Vaginale partus   | 1 | 1 |
| 869 | 0 | 39,72 | Vaginale partus   | 1 | 1 |
| 870 | 0 | 39,86 | Vaginale partus   | 1 | 1 |
| 871 | 0 | 39,86 | Vaginale partus   | 1 | 1 |
| 872 | 0 | 38,57 | Primaire sectio   | 0 | 1 |
| 873 | 0 | 38,57 | Primaire sectio   | 0 | 1 |
| 874 | 0 | 38,72 | Secundaire sectio | 0 | 1 |
| 875 | 0 | 38,72 | Secundaire sectio | 0 | 1 |
| 876 | 0 | 40    | prim.sectio       | 0 | 1 |
| 877 | 0 | 39,72 | Vaginale partus   | 0 | 1 |
| 878 | 0 | 39,72 | Vaginale partus   | 0 | 1 |
| 879 | 0 | 39,28 | Vaginale partus   | 0 | 1 |
| 880 | 0 | 39,28 | Vaginale partus   | 0 | 1 |
| 881 | 0 | 41,72 | Secundaire sectio | 0 | 1 |
| 882 | 0 | 41,72 | Secundaire sectio | 0 | 1 |
| 883 | 0 | 41    | Vaginale partus   | 0 | 1 |
| 884 | 0 | 41    | Vaginale partus   | 0 | 1 |
| 885 | 0 | 39,86 | Vaginale partus   | 0 | 1 |
| 886 | 0 | 39,86 | Vaginale partus   | 0 | 1 |
| 887 | 0 | 39,72 | sec.sectio        | 0 | 1 |
| 888 | 0 | 41    | Vaginale partus   | 0 | 1 |
| 889 | 0 | 41    | Vaginale partus   | 0 | 1 |
| 890 | 0 | 39,57 | Vaginale partus   | 0 | 1 |

|     |   |       |                 |   |   |
|-----|---|-------|-----------------|---|---|
| 891 | 0 | 40,14 | Vaginale partus | 0 | 1 |
| 892 | 0 | 40,14 | Vaginale partus | 0 | 1 |
| 893 | 0 | 39,86 | vaginaal        | 0 | 1 |
| 894 | 0 | 39    | Vaginale partus | 0 | 1 |
| 895 | 0 | 39    | Vaginale partus | 0 | 1 |
| 896 | 0 | 39,57 | sec.sectio      | 0 | 1 |
| 897 | 0 | 39,14 | Repeat sectio   | 0 | 1 |
| 898 | 0 | 39,14 | Repeat sectio   | 0 | 1 |
| 899 | 0 | 37,43 | Vaginale partus | 0 | 1 |
| 900 | 0 | 37,43 | Vaginale partus | 0 | 1 |
| 901 | 0 | 40    | vaginaal        | 0 | 1 |
| 902 | 0 | 39,72 | Vaginale partus | 0 | 1 |
| 903 | 0 | 39,72 | Vaginale partus | 0 | 1 |
| 904 | 0 | 41,14 | vaginaal        | 0 | 1 |
| 905 | 0 | 39,86 | Vaginale partus | 1 | 1 |
| 906 | 0 | 39,86 | Vaginale partus | 1 | 1 |
| 907 | 0 | 39    | Repeat sectio   | 1 | 1 |
| 908 | 0 | 39    | Repeat sectio   | 1 | 1 |
| 909 | 0 | 40,14 | vaginaal        | 1 | 1 |
| 910 | 0 | 35,86 | vaginaal        | 0 | 1 |
| 911 | 0 | 41,57 | vaginaal        | 1 | 1 |
| 912 | 0 | 40,43 | vaginaal        | 0 | 1 |
| 913 | 0 | 39    | Primaire sectio | 0 | 1 |
| 914 | 0 | 39    | Primaire sectio | 0 | 1 |
| 915 | 0 | 40,72 | Vaginale partus | 0 | 1 |
| 916 | 0 | 40,72 | Vaginale partus | 0 | 1 |
| 917 | 0 | 41,14 | vaginaal        | 0 | 1 |
| 918 | 0 | 37,86 | Primaire sectio | 0 | 1 |
| 919 | 0 | 37,86 | Primaire sectio | 0 | 1 |
| 920 | 0 | 40,14 | vaginaal        | 0 | 1 |
| 921 | 0 | 38    | vaginaal        | 0 | 1 |
| 922 | 0 | 39,72 | Repeat sectio   | 0 | 1 |
| 923 | 0 | 39,72 | Repeat sectio   | 0 | 1 |

|     |   |       |                   |   |   |
|-----|---|-------|-------------------|---|---|
| 924 | 0 | 40,28 | sec.sectio        | 0 | 1 |
| 925 | 0 | 38,43 | Vaginale partus   | 0 | 1 |
| 926 | 0 | 38,43 | Vaginale partus   | 0 | 1 |
| 927 | 0 | 39,57 | Vaginale partus   | 1 | 1 |
| 928 | 0 | 39,57 | Vaginale partus   | 1 | 1 |
| 929 | 0 | 40    | Vaginale partus   | 1 | 1 |
| 930 | 0 | 40    | Vaginale partus   | 1 | 1 |
| 931 | 0 | 38,86 | Secundaire sectio | 1 | 1 |
| 932 | 0 | 38,14 | Secundaire sectio | 0 | 1 |
| 933 | 0 | 38,14 | Secundaire sectio | 0 | 1 |
| 934 | 0 | 39,43 | Secundaire sectio | 1 | 1 |
| 935 | 0 | 39,43 | Secundaire sectio | 1 | 1 |
| 936 | 0 | 40,14 | Vaginale partus   | 1 | 1 |
| 937 | 0 | 40,14 | Vaginale partus   | 1 | 1 |
| 938 | 0 | 41,14 | Secundaire sectio | 1 | 1 |
| 939 | 0 | 41,14 | Secundaire sectio | 1 | 1 |
| 940 | 0 | 39,57 | Vaginale partus   | 0 | 1 |
| 941 | 0 | 39,57 | Vaginale partus   | 0 | 1 |
| 942 | 0 | 40,43 | Vaginale partus   | 0 | 1 |
| 943 | 0 | 40,43 | Vaginale partus   | 0 | 1 |
| 944 | 0 | 40,14 | vaginaal          | 0 | 1 |
| 945 | 0 | 38,14 | Vaginale partus   | 1 | 1 |
| 946 | 0 | 38,14 | Vaginale partus   | 1 | 1 |
| 947 | 0 | 38,72 | Vaginale partus   | 0 | 1 |
| 948 | 0 | 38,43 | Primaire sectio   | 0 | 1 |
| 949 | 0 | 38,43 | Primaire sectio   | 0 | 1 |
| 950 | 0 | 40,72 | Vaginale partus   | 0 | 1 |
| 951 | 0 | 40,72 | Vaginale partus   | 0 | 1 |
| 952 | 0 | 41,43 | vaginaal          | 0 | 1 |
| 953 | 0 | 41,28 | Secundaire sectio | 0 | 1 |
| 954 | 0 | 41,28 | Vaginale partus   | 0 | 1 |
| 955 | 0 | 41,28 | Vaginale partus   | 0 | 1 |
| 956 | 0 | 40,72 | Vaginale partus   | 0 | 1 |



|     |   |       |                   |   |   |
|-----|---|-------|-------------------|---|---|
| 957 | 0 | 40,72 | Vaginale partus   | 0 | 1 |
| 958 | 0 | 41,43 | Vaginale partus   | 0 | 1 |
| 959 | 0 | 39,72 | Vaginale partus   | 0 | 1 |
| 960 | 0 | 39,72 | Vaginale partus   | 0 | 1 |
| 961 | 0 | 37,57 | Secundaire sectio | 0 | 1 |
| 962 | 0 | 37,57 | Secundaire sectio | 0 | 1 |
| 963 | 0 | 39,14 | Vaginale partus   | 0 | 1 |
| 964 | 0 | 39,14 | Vaginale partus   | 0 | 1 |
| 965 | 0 | 39,86 | Vaginale partus   | 2 | 1 |
| 966 | 0 | 39,86 | Vaginale partus   | 2 | 1 |
| 967 | 0 | 39,86 | Vaginale partus   | 2 | 1 |
| 968 | 0 | 40,28 | Vaginale partus   | 0 | 1 |
| 969 | 0 | 40,28 | Vaginale partus   | 0 | 1 |
| 970 | 0 | 39,14 | Vaginale partus   | 0 | 1 |
| 971 | 0 | 39,14 | Vaginale partus   | 0 | 1 |
| 972 | 0 | 40,28 | vaginaal          | 0 | 1 |
| 973 | 0 | 40,14 | vaginaal          | 0 | 1 |
| 974 | 0 | 39,86 | Vaginale partus   | 0 | 1 |
| 975 | 0 | 39,86 | Vaginale partus   | 0 | 1 |
| 976 | 0 | 40,43 | Vaginale partus   | 0 | 1 |
| 977 | 0 | 40,43 | Vaginale partus   | 0 | 1 |
| 978 | 0 | 40    | vaginaal          | 0 | 1 |
| 979 | 0 | 40,43 | Vaginale partus   | 0 | 1 |
| 980 | 0 | 40,28 | vaginaal          | 0 | 1 |
| 981 | 0 | 37    | Secundaire sectio | 2 | 1 |
| 982 | 0 | 37    | Secundaire sectio | 2 | 1 |
| 983 | 0 | 39    | Vaginale partus   | 0 | 1 |
| 984 | 0 | 39    | Vaginale partus   | 0 | 1 |
| 985 | 0 | 41    | Vaginale partus   | 0 | 1 |
| 986 | 0 | 41    | Vaginale partus   | 0 | 1 |
| 987 | 0 | 41,28 | Secundaire sectio | 1 | 1 |
| 988 | 0 | 41,28 | Secundaire sectio | 1 | 1 |
| 989 | 0 | 41    | Vaginale partus   | 0 | 1 |

|      |   |       |                   |   |   |
|------|---|-------|-------------------|---|---|
| 990  | 0 | 41    | Vaginale partus   | 0 | 1 |
| 991  | 0 | 35,43 | Secundaire sectio | 2 | 1 |
| 992  | 0 | 35,43 | Secundaire sectio | 2 | 1 |
| 993  | 0 | 36    | Vaginale partus   | 0 | 1 |
| 994  | 0 | 37    | Secundaire sectio | 2 | 1 |
| 995  | 0 | 37    | Secundaire sectio | 2 | 1 |
| 996  | 0 | 37    | Secundaire sectio | 2 | 1 |
| 997  | 0 | 40    | Vaginale partus   | 0 | 1 |
| 998  | 0 | 40    | Vaginale partus   | 0 | 1 |
| 999  | 0 | 38,57 | vaginaal          | 1 | 1 |
| 1000 | 0 | 39,28 | vaginaal          | 0 | 1 |
| 1001 | 0 | 39    | prim.sectio       | 0 | 1 |
| 1002 | 0 | 41,14 | vaginaal          | 0 | 1 |
| 1003 | 0 | 40,72 | Vaginale partus   | 0 | 1 |
| 1004 | 0 | 40,72 | Vaginale partus   | 0 | 1 |
| 1005 | 0 | 40,72 | Vaginale partus   | 0 | 1 |
| 1006 | 0 | 38,43 | Vaginale partus   | 0 | 1 |
| 1007 | 0 | 38,43 | Vaginale partus   | 0 | 1 |
| 1008 | 0 | 38,43 | Vaginale partus   | 0 | 1 |
| 1009 | 0 | 41,14 | Vaginale partus   | 0 | 1 |
| 1010 | 0 | 41,14 | Vaginale partus   | 0 | 1 |
| 1011 | 0 | 40,28 | Vaginale partus   | 0 | 1 |
| 1012 | 0 | 40,28 | Vaginale partus   | 0 | 1 |
| 1013 | 0 | 39,86 | Vaginale partus   | 1 | 1 |
| 1014 | 0 | 39,86 | Vaginale partus   | 1 | 1 |
| 1015 | 0 | 35    | vaginaal          | 0 | 1 |
| 1016 | 0 | 31,86 | Vaginale partus   | 1 | 1 |
| 1017 | 0 | 31,86 | Vaginale partus   | 1 | 1 |
| 1018 | 0 | 37,57 | vaginaal          | 0 | 1 |
| 1019 | 0 | 40,72 | Vaginale partus   | 0 | 1 |
| 1020 | 0 | 40,72 | Vaginale partus   | 0 | 1 |
| 1021 | 0 | 39,14 | prim.sectio       | 1 | 1 |
| 1022 | 0 | 40,43 | Vaginale partus   | 0 | 1 |

|      |   |       |                   |   |   |
|------|---|-------|-------------------|---|---|
| 1023 | 0 | 40,43 | Vaginale partus   | 0 | 1 |
| 1024 | 0 | 38,57 | Vaginale partus   | 0 | 1 |
| 1025 | 0 | 40    | vaginaal          | 0 | 1 |
| 1026 | 0 | 40,86 | sec.sectio        | 0 | 1 |
| 1027 | 0 | 40    | Vaginale partus   | 0 | 1 |
| 1028 | 0 | 40    | Vaginale partus   | 0 | 1 |
| 1029 | 0 | 40,14 | Vaginale partus   | 0 | 1 |
| 1030 | 0 | 40,14 | Vaginale partus   | 0 | 1 |
| 1031 | 0 | 39,28 | Vaginale partus   | 0 | 1 |
| 1032 | 0 | 39,28 | Vaginale partus   | 0 | 1 |
| 1033 | 0 | 39,28 | Vaginale partus   | 0 | 1 |
| 1034 | 0 | 37,14 | Vaginale partus   | 0 | 1 |
| 1035 | 0 | 37,14 | Vaginale partus   | 0 | 1 |
| 1036 | 0 | 41,14 | Vaginale partus   | 0 | 1 |
| 1037 | 0 | 40,57 | Vaginale partus   | 0 | 1 |
| 1038 | 0 | 39,14 | vaginaal          | 0 | 1 |
| 1039 | 0 | 40,86 | Secundaire sectio | 0 | 1 |
| 1040 | 0 | 40,86 | Secundaire sectio | 0 | 1 |
| 1041 | 0 | 38    | Vaginale partus   | 0 | 1 |
| 1042 | 0 | 38    | Vaginale partus   | 0 | 1 |
| 1043 | 0 | 38,57 | Repeat sectio     | 0 | 1 |
| 1044 | 0 | 38,57 | Repeat sectio     | 0 | 1 |
| 1045 | 0 | 40,86 | Vaginale partus   | 0 | 1 |
| 1046 | 0 | 40,86 | Vaginale partus   | 0 | 1 |
| 1047 | 0 | 40,86 | Vaginale partus   | 0 | 1 |
| 1048 | 0 | 37,14 | sec.sectio        | 0 | 1 |
| 1049 | 0 | 39    | Primaire sectio   | 0 | 1 |
| 1050 | 0 | 39    | Primaire sectio   | 0 | 1 |
| 1051 | 0 | 40,14 | vaginaal          | 0 | 1 |
| 1052 | 0 | 40,57 | Vaginale partus   | 0 | 1 |
| 1053 | 0 | 40,57 | Vaginale partus   | 0 | 1 |
| 1054 | 0 | 39,57 | Vaginale partus   | 2 | 1 |
| 1055 | 0 | 39,57 | Vaginale partus   | 2 | 1 |

|      |   |       |                   |   |   |
|------|---|-------|-------------------|---|---|
| 1056 | 0 | 40,86 | vaginaal          | 1 | 1 |
| 1057 | 0 | 37,28 | Secundaire sectio | 1 | 1 |
| 1058 | 0 | 37,28 | Secundaire sectio | 1 | 1 |
| 1059 | 0 | 40,28 | Vaginale partus   | 0 | 1 |
| 1060 | 0 | 40,28 | Vaginale partus   | 0 | 1 |
| 1061 | 0 | 40,28 | Vaginale partus   | 0 | 1 |
| 1062 | 0 | 38    | Vaginale partus   | 1 | 1 |
| 1063 | 0 | 38    | Vaginale partus   | 1 | 1 |
| 1064 | 0 | 38,57 | Vaginale partus   | 0 | 1 |
| 1065 | 0 | 38,43 | Vaginale partus   | 2 | 1 |
| 1066 | 0 | 38,43 | Vaginale partus   | 2 | 1 |
| 1067 | 0 | 38,43 | Vaginale partus   | 2 | 1 |
| 1068 | 0 | 41,28 | Vaginale partus   | 1 | 1 |
| 1069 | 0 | 41,28 | Vaginale partus   | 1 | 1 |
| 1070 | 0 | 41,28 | Vaginale partus   | 1 | 1 |
| 1071 | 0 | 39,72 | Vaginale partus   | 1 | 1 |
| 1072 | 0 | 39,72 | Vaginale partus   | 1 | 1 |
| 1073 | 0 | 40,43 | vaginaal          | 0 | 1 |
| 1074 | 0 | 39,86 | vaginaal          | 0 | 1 |
| 1075 | 0 | 39    | Vaginale partus   | 1 | 1 |
| 1076 | 0 | 39    | Vaginale partus   | 1 | 1 |
| 1077 | 0 | 40,86 | vaginaal          | 1 | 1 |
| 1078 | 0 | 38,72 | Vaginale partus   | 0 | 1 |
| 1079 | 0 | 37,28 | Vaginale partus   | 1 | 1 |
| 1080 | 0 | 37,28 | Vaginale partus   | 1 | 1 |
| 1081 | 0 | 41,43 | vaginaal          | 1 | 1 |
| 1082 | 0 | 39,72 | Vaginale partus   | 1 | 1 |
| 1083 | 0 | 39,72 | Vaginale partus   | 1 | 1 |
| 1084 | 0 | 41,57 | Vaginale partus   | 0 | 1 |
| 1085 | 0 | 41,57 | Vaginale partus   | 0 | 1 |
| 1086 | 0 | 41,43 | Vaginale partus   | 0 | 1 |
| 1087 | 0 | 41,43 | Vaginale partus   | 0 | 1 |
| 1088 | 0 | 40,57 | Vaginale partus   | 0 | 1 |

|      |   |       |                   |   |   |
|------|---|-------|-------------------|---|---|
| 1089 | 0 | 38    | prim.sectio       | 1 | 1 |
| 1090 | 0 | 41    | Vaginale partus   | 0 | 1 |
| 1091 | 0 | 41    | Vaginale partus   | 0 | 1 |
| 1092 | 0 | 40    | vaginaal          | 0 | 1 |
| 1093 | 0 | 40,43 | Vaginale partus   | 1 | 1 |
| 1094 | 0 | 37,28 | sectio            | 1 | 1 |
| 1095 | 0 | 38,86 | Repeat sectio     | 1 | 1 |
| 1096 | 0 | 38,86 | Repeat sectio     | 1 | 1 |
| 1097 | 0 | 40    | Vaginale partus   | 0 | 1 |
| 1098 | 0 | 40    | Vaginale partus   | 0 | 1 |
| 1099 | 0 | 39,57 | Vaginale partus   | 1 | 1 |
| 1100 | 0 | 39,57 | Vaginale partus   | 1 | 1 |
| 1101 | 0 | 39,57 | Vaginale partus   | 1 | 1 |
| 1102 | 0 | 37,43 | prim.sectio       | 2 | 1 |
| 1103 | 0 | 38,57 | Primaire sectio   | 0 | 1 |
| 1104 | 0 | 38,57 | Primaire sectio   | 0 | 1 |
| 1105 | 0 | 38,57 | Primaire sectio   | 0 | 1 |
| 1106 | 0 | 41,14 | Secundaire sectio | 0 | 1 |
| 1107 | 0 | 41,14 | Secundaire sectio | 0 | 1 |
| 1108 | 0 | 39    | Primaire sectio   | 1 | 1 |
| 1109 | 0 | 39    | Primaire sectio   | 1 | 1 |
| 1110 | 0 | 37,86 | Vaginale partus   | 1 | 1 |
| 1111 | 0 | 37,86 | Vaginale partus   | 1 | 1 |
| 1112 | 0 | 37,86 | Vaginale partus   | 1 | 1 |
| 1113 | 0 | 40,14 | sec.sectio        | 2 | 1 |
| 1114 | 0 | 39    | Vaginale partus   | 1 | 1 |
| 1115 | 0 | 39    | Vaginale partus   | 1 | 1 |
| 1116 | 0 | 40,57 | vaginaal          | 0 | 1 |
| 1117 | 0 | 38,43 | Primaire sectio   | 0 | 1 |
| 1118 | 0 | 38,43 | Primaire sectio   | 0 | 1 |
| 1119 | 0 | 38,43 | Primaire sectio   | 0 | 1 |
| 1120 | 0 | 39,57 | vaginaal          | 2 | 1 |
| 1121 | 0 | 39,72 | Vaginale partus   | 0 | 1 |

|      |   |       |                 |   |   |
|------|---|-------|-----------------|---|---|
| 1122 | 0 | 39,72 | Vaginale partus | 0 | 1 |
| 1123 | 0 | 38,14 | Vaginale partus | 0 | 1 |
| 1124 | 0 | 38,14 | Vaginale partus | 0 | 1 |
| 1125 | 0 | 37    | Vaginale partus | 0 | 1 |
| 1126 | 0 | 37    | Vaginale partus | 0 | 1 |
| 1127 | 0 | 40,43 | vaginaal        | 0 | 1 |
| 1128 | 0 | 39    | Vaginale partus | 0 | 1 |
| 1129 | 0 | 40    | vaginaal        | 0 | 1 |
| 1130 | 0 | 39    | Vaginale partus | 0 | 1 |
| 1131 | 0 | 38,43 | Vaginale partus | 0 | 1 |
| 1132 | 0 | 39,28 | Vaginale partus | 0 | 1 |
| 1133 | 0 | 39,28 | Vaginale partus | 0 | 1 |
| 1134 | 0 | 38,43 | Vaginale partus | 0 | 1 |
| 1135 | 0 | 40,57 | Vaginale partus | 0 | 1 |
| 1136 | 0 | 40,57 | Vaginale partus | 0 | 1 |
| 1137 | 0 | 40,57 | Vaginale partus | 0 | 1 |
| 1138 | 0 | 40,28 | Vaginale partus | 0 | 1 |
| 1139 | 0 | 40,28 | Vaginale partus | 0 | 1 |
| 1140 | 0 | 39,72 | vaginaal        | 0 | 1 |
| 1141 | 0 | 41,14 | Vaginale partus | 0 | 1 |
| 1142 | 0 | 35,57 | Vaginale partus | 0 | 1 |
| 1143 | 0 | 39,72 | Vaginale partus | 0 | 1 |
| 1144 | 0 | 39,57 | Vaginale partus | 0 | 1 |
| 1145 | 0 | 35,57 | Vaginale partus | 0 | 1 |
| 1146 | 0 | 39,72 | Vaginale partus | 0 | 1 |
| 1147 | 0 | 39,57 | Vaginale partus | 0 | 1 |
| 1148 | 0 | 39,72 | Vaginale partus | 0 | 1 |
| 1149 | 0 | 41    | Vaginale partus | 0 | 1 |
| 1150 | 0 | 41    | Vaginale partus | 0 | 1 |
| 1151 | 0 | 39,43 | Vaginale partus | 0 | 1 |
| 1152 | 0 | 39,43 | Vaginale partus | 0 | 1 |
| 1153 | 0 | 37,43 | Vaginale partus | 0 | 1 |
| 1154 | 0 | 37,57 | sec.sectio      | 0 | 1 |

|      |   |       |                 |   |   |
|------|---|-------|-----------------|---|---|
| 1155 | 0 | 40,57 | Vaginale partus | 0 | 1 |
| 1156 | 0 | 40,43 | Vaginale partus | 0 | 1 |
| 1157 | 0 | 40,57 | Vaginale partus | 0 | 1 |
| 1158 | 0 | 40,43 | Vaginale partus | 0 | 1 |
| 1159 | 0 | 39,43 | Vaginale partus | 0 | 1 |
| 1160 | 0 | 39,43 | Vaginale partus | 0 | 1 |
| 1161 | 0 | 39,28 | vaginaal        | 0 | 1 |
| 1162 | 0 | 40,14 | Vaginale partus | 0 | 1 |
| 1163 | 0 | 40,14 | Vaginale partus | 0 | 1 |
| 1164 | 0 | 39,57 | vaginaal        | 0 | 1 |
| 1165 | 0 | 39,72 | vaginaal        | 0 | 1 |
| 1166 | 0 | 40,57 | vaginaal        | 0 | 1 |
| 1167 | 0 | 37,43 | Vaginale partus | 0 | 1 |
| 1168 | 0 | 39,14 | vaginaal        | 0 | 1 |
| 1169 | 0 | 40,28 | Vaginale partus | 0 | 1 |
| 1170 | 0 | 40,28 | Vaginale partus | 0 | 1 |
| 1171 | 0 | 40    | Vaginale partus | 0 | 1 |
| 1172 | 0 | 38,43 | Vaginale partus | 0 | 1 |
| 1173 | 0 | 40    | Vaginale partus | 0 | 1 |
| 1174 | 0 | 38,43 | Vaginale partus | 0 | 1 |
| 1175 | 0 | 40,86 | Vaginale partus | 0 | 1 |
| 1176 | 0 | 41    | Vaginale partus | 0 | 1 |
| 1177 | 0 | 39,72 | Vaginale partus | 0 | 1 |
| 1178 | 0 | 39,72 | Vaginale partus | 0 | 1 |
| 1179 | 0 | 40,86 | Vaginale partus | 0 | 1 |
| 1180 | 0 | 39,14 | vaginaal        | 0 | 1 |
| 1181 | 0 | 40,28 | Vaginale partus | 0 | 1 |
| 1182 | 0 | 40,28 | Vaginale partus | 0 | 1 |
| 1183 | 0 | 38,86 | Vaginale partus | 0 | 1 |
| 1184 | 0 | 37,43 | Vaginale partus | 0 | 1 |
| 1185 | 0 | 39,86 | Vaginale partus | 0 | 1 |
| 1186 | 0 | 38,86 | Vaginale partus | 0 | 1 |
| 1187 | 0 | 35,86 | Vaginale partus | 0 | 1 |

|      |   |       |                   |   |   |
|------|---|-------|-------------------|---|---|
| 1188 | 0 | 37,43 | Vaginale partus   | 0 | 1 |
| 1189 | 0 | 40,28 | Vaginale partus   | 0 | 1 |
| 1190 | 0 | 35,86 | Vaginale partus   | 0 | 1 |
| 1191 | 0 | 39,86 | Vaginale partus   | 0 | 1 |
| 1192 | 0 | 38,86 | Vaginale partus   | 0 | 1 |
| 1193 | 0 | 40,28 | Vaginale partus   | 0 | 1 |
| 1194 | 0 | 38,86 | Vaginale partus   | 0 | 1 |
| 1195 | 0 | 40,28 | Vaginale partus   | 0 | 1 |
| 1196 | 0 | 38,86 | Vaginale partus   | 0 | 1 |
| 1197 | 0 | 39,14 | vaginaal          | 0 | 1 |
| 1198 | 0 | 39,28 | Vaginale partus   | 0 | 1 |
| 1199 | 0 | 39,28 | Vaginale partus   | 0 | 1 |
| 1200 | 0 | 41,43 | sec.sectio        | 0 | 1 |
| 1201 | 0 | 38,28 | vaginaal          | 0 | 1 |
| 1202 | 0 | 41,28 | vaginaal          | 0 | 1 |
| 1203 | 0 | 41,14 | Secundaire sectio | 0 | 1 |
| 1204 | 0 | 41,14 | Secundaire sectio | 0 | 1 |
| 1205 | 0 | 41,14 | Secundaire sectio | 0 | 1 |
| 1206 | 0 | 40,86 | Vaginale partus   | 0 | 1 |
| 1207 | 0 | 40,86 | Vaginale partus   | 0 | 1 |
| 1208 | 0 | 35,86 | Vaginale partus   | 0 | 1 |
| 1209 | 0 | 41    | Vaginale partus   | 0 | 1 |
| 1210 | 0 | 40,86 | Vaginale partus   | 0 | 1 |
| 1211 | 0 | 41    | Vaginale partus   | 0 | 1 |
| 1212 | 0 | 36    | vaginaal          | 0 | 1 |
| 1213 | 0 | 39,86 | Vaginale partus   | 0 | 1 |
| 1214 | 0 | 40,14 | Vaginale partus   | 0 | 1 |
| 1215 | 0 | 40    | Vaginale partus   | 0 | 1 |
| 1216 | 0 | 39,86 | Vaginale partus   | 0 | 1 |
| 1217 | 0 | 40    | vaginaal          | 0 | 1 |
| 1218 | 0 | 40    | Vaginale partus   | 0 | 1 |
| 1219 | 0 | 39    | Vaginale partus   | 0 | 1 |
| 1220 | 0 | 40,14 | Vaginale partus   | 0 | 1 |



|      |   |       |                   |   |   |
|------|---|-------|-------------------|---|---|
| 1221 | 0 | 40,28 | Vaginale partus   | 0 | 1 |
| 1222 | 0 | 41,28 | vaginaal          | 0 | 1 |
| 1223 | 0 | 40,28 | Vaginale partus   | 0 | 1 |
| 1224 | 0 | 40,43 | Vaginale partus   | 0 | 1 |
| 1225 | 0 | 39,86 | vaginaal          | 0 | 1 |
| 1226 | 0 | 40,43 | Vaginale partus   | 0 | 1 |
| 1227 | 0 | 39,43 | Vaginale partus   | 0 | 1 |
| 1228 | 0 | 39,72 | Vaginale partus   | 0 | 1 |
| 1229 | 0 | 39,72 | Vaginale partus   | 0 | 1 |
| 1230 | 0 | 39    | prim.sectio       | 0 | 1 |
| 1231 | 0 | 39,57 | Primaire sectio   | 0 | 1 |
| 1232 | 0 | 39,57 | Primaire sectio   | 0 | 1 |
| 1233 | 0 | 40,86 | vaginaal          | 0 | 1 |
| 1234 | 0 | 39,28 | vaginaal          | 0 | 1 |
| 1235 | 0 | 38    | Vaginale partus   | 0 | 1 |
| 1236 | 0 | 38    | Vaginale partus   | 0 | 1 |
| 1237 | 0 | 39,57 | Vaginale partus   | 0 | 1 |
| 1238 | 0 | 39,57 | Vaginale partus   | 0 | 1 |
| 1239 | 0 | 38,43 | Primaire sectio   | 0 | 1 |
| 1240 | 0 | 38,43 | Primaire sectio   | 0 | 1 |
| 1241 | 0 | 39,28 | vaginaal          | 0 | 1 |
| 1242 | 0 | 40,86 | Vaginale partus   | 0 | 1 |
| 1243 | 0 | 40,86 | Vaginale partus   | 0 | 1 |
| 1244 | 0 | 38,57 | sec.sectio        | 0 | 1 |
| 1245 | 0 | 39    | vaginaal          | 0 | 1 |
| 1246 | 0 | 39,72 | Vaginale partus   | 0 | 1 |
| 1247 | 0 | 39,72 | Vaginale partus   | 0 | 1 |
| 1248 | 0 | 39,43 | vaginaal          | 0 | 1 |
| 1249 | 0 | 37,14 | Vaginale partus   | 0 | 1 |
| 1250 | 0 | 37,14 | Secundaire sectio | 0 | 1 |
| 1251 | 0 | 37,14 | Secundaire sectio | 0 | 1 |
| 1252 | 0 | 39,72 | Vaginale partus   | 0 | 1 |
| 1253 | 0 | 39,72 | Vaginale partus   | 0 | 1 |

|      |   |       |                   |   |   |
|------|---|-------|-------------------|---|---|
| 1254 | 0 | 40,72 | Vaginale partus   | 0 | 1 |
| 1255 | 0 | 40,72 | Vaginale partus   | 0 | 1 |
| 1256 | 0 | 39,28 |                   | 0 | 1 |
| 1257 | 0 | 40    | Vaginale partus   | 0 | 1 |
| 1258 | 0 | 40    | Vaginale partus   | 0 | 1 |
| 1259 | 0 | 40,43 | vaginaal          | 0 | 1 |
| 1260 | 0 | 39,14 | Vaginale partus   | 0 | 1 |
| 1261 | 0 | 39,14 | Vaginale partus   | 0 | 1 |
| 1262 | 0 | 39,57 | vaginaal          | 0 | 1 |
| 1263 | 0 | 40,14 | vaginaal          | 0 | 1 |
| 1264 | 0 | 38,28 | Vaginale partus   | 0 | 1 |
| 1265 | 0 | 38,28 | Vaginale partus   | 0 | 1 |
| 1266 | 0 | 40,56 | Vaginale partus   | 0 | 1 |
| 1267 | 0 | 38,86 | Vaginale partus   | 0 | 1 |
| 1268 | 0 | 38,86 | Vaginale partus   | 0 | 1 |
| 1269 | 0 | 40,43 | vaginaal          | 0 | 1 |
| 1270 | 0 | 41,28 | vaginaal          | 0 | 1 |
| 1271 | 0 | 39,57 | vaginaal          | 0 | 1 |
| 1272 | 0 | 39,14 | Vaginale partus   | 0 | 1 |
| 1273 | 0 | 39,14 | Vaginale partus   | 0 | 1 |
| 1274 | 0 | 39,43 | Vaginale partus   | 0 | 1 |
| 1275 | 0 | 39,43 | Vaginale partus   | 0 | 1 |
| 1276 | 0 | 41,14 | vaginaal          | 0 | 1 |
| 1277 | 0 | 39,43 | Secundaire sectio | 0 | 1 |
| 1278 | 0 | 39,43 | Secundaire sectio | 0 | 1 |
| 1279 | 0 | 40,14 | Vaginale partus   | 0 | 1 |
| 1280 | 0 | 40,14 | Vaginale partus   | 0 | 1 |
| 1281 | 0 | 40,14 | Vaginale partus   | 0 | 1 |
| 1282 | 0 | 41,14 | Vaginale partus   | 0 | 1 |
| 1283 | 0 | 41,14 | Vaginale partus   | 0 | 1 |
| 1284 | 0 | 39,57 | vaginaal          | 0 | 1 |
| 1285 | 0 | 40,72 | Vaginale partus   | 0 | 1 |
| 1286 | 0 | 40,72 | Vaginale partus   | 0 | 1 |

|      |   |       |                 |   |   |
|------|---|-------|-----------------|---|---|
| 1287 | 0 | 39,86 | Vaginale partus | 0 | 1 |
| 1288 | 0 | 39,86 | Vaginale partus | 0 | 1 |
| 1289 | 0 | 40,72 | Vaginale partus | 0 | 1 |
| 1290 | 0 | 40,72 | Vaginale partus | 0 | 1 |
| 1291 | 0 | 39,28 | Primaire sectio | 0 | 1 |
| 1292 | 0 | 39,28 | Primaire sectio | 0 | 1 |
| 1293 | 0 | 39,28 | Primaire sectio | 0 | 1 |
| 1294 | 0 | 39    | Primaire sectio | 0 | 1 |
| 1295 | 0 | 39    | Primaire sectio | 0 | 1 |
| 1296 | 0 | 37,28 | prim.sectio     | 0 | 1 |
| 1297 | 0 | 39,72 | sec.sectio      | 0 | 1 |
| 1298 | 0 | 38,57 | Primaire sectio | 0 | 1 |
| 1299 | 0 | 38,57 | Primaire sectio | 0 | 1 |
| 1300 | 0 | 38,86 | vaginaal        | 0 | 1 |
| 1301 | 0 | 39    | vaginaal        | 0 | 1 |
| 1302 | 0 | 41,43 | Vaginale partus | 0 | 1 |
| 1303 | 0 | 41,43 | Vaginale partus | 0 | 1 |
| 1304 | 0 | 38,86 | Vaginale partus | 0 | 1 |
| 1305 | 0 | 38,86 | Vaginale partus | 0 | 1 |
| 1306 | 0 | 38,72 | Vaginale partus | 0 | 1 |
| 1307 | 0 | 38,72 | Vaginale partus | 0 | 1 |
| 1308 | 0 | 38,72 | Vaginale partus | 0 | 1 |
| 1309 | 0 | 38,28 | Vaginale partus | 0 | 1 |
| 1310 | 0 | 38,28 | Vaginale partus | 0 | 1 |
| 1311 | 0 | 40    | vaginaal        | 0 | 1 |
| 1312 | 0 | 39,72 | Vaginale partus | 0 | 1 |
| 1313 | 0 | 39,72 | Vaginale partus | 0 | 1 |
| 1314 | 0 | 41,14 | Vaginale partus | 0 | 1 |
| 1315 | 0 | 41,14 | Vaginale partus | 0 | 1 |
| 1316 | 0 | 41,14 | Vaginale partus | 0 | 1 |
| 1317 | 0 | 41,14 | Vaginale partus | 0 | 1 |
| 1318 | 0 | 40,14 | Vaginale partus | 2 | 1 |
| 1319 | 0 | 40,14 | Vaginale partus | 2 | 1 |

|      |   |       |                 |   |   |
|------|---|-------|-----------------|---|---|
| 1320 | 0 | 40,86 |                 | 1 | 1 |
| 1321 | 0 | 40,86 |                 | 1 | 1 |
| 1322 | 0 | 40,28 | Vaginale partus | 1 | 1 |
| 1323 | 0 | 40,57 | Vaginale partus | 1 | 1 |
| 1324 | 0 | 41    | Vaginale partus | 0 | 1 |
| 1325 | 0 | 41    | Vaginale partus | 0 | 1 |
| 1326 | 0 | 39,43 | Vaginale partus | 0 | 1 |
| 1327 | 0 | 39,43 | Vaginale partus | 0 | 1 |
| 1328 | 0 | 40,86 | vaginaal        | 0 | 1 |
| 1329 | 0 | 41,14 | vaginaal        | 0 | 1 |
| 1330 | 0 | 40    | vaginaal        | 0 | 1 |
| 1331 | 0 | 39,72 | vaginaal        | 0 | 1 |
| 1332 | 0 | 40,43 | Vaginale partus | 0 | 1 |
| 1333 | 0 | 40,43 | Vaginale partus | 0 | 1 |
| 1334 | 0 | 38,43 | sec.sectio      | 0 | 1 |
| 1335 | 0 | 39,57 | Vaginale partus | 1 | 1 |
| 1336 | 0 | 39,57 | Vaginale partus | 1 | 1 |
| 1337 | 0 | 39,72 | Vaginale partus | 1 | 1 |
| 1338 | 0 | 39,72 | Vaginale partus | 1 | 1 |
| 1339 | 0 | 40,72 | Vaginale partus | 0 | 1 |
| 1340 | 0 | 40,72 | Vaginale partus | 0 | 1 |
| 1341 | 0 | 39,43 | Primaire sectio | 0 | 1 |
| 1342 | 0 | 39,43 | Primaire sectio | 0 | 1 |
| 1343 | 0 | 38,43 |                 | 0 | 1 |
| 1344 | 0 | 38,43 |                 | 0 | 1 |
| 1345 | 0 | 40,72 | Vaginale partus | 0 | 1 |
| 1346 | 0 | 40,72 | Vaginale partus | 0 | 1 |
| 1347 | 0 | 40    | Vaginale partus | 0 | 1 |
| 1348 | 0 | 40    | Vaginale partus | 0 | 1 |
| 1349 | 0 | 39    | Vaginale partus | 0 | 1 |
| 1350 | 0 | 40,14 | Vaginale partus | 0 | 1 |
| 1351 | 0 | 40,14 | Vaginale partus | 0 | 1 |
| 1352 | 0 | 40,43 | Vaginale partus | 2 | 1 |

|      |   |       |                   |   |   |
|------|---|-------|-------------------|---|---|
| 1353 | 0 | 40,43 | Vaginale partus   | 2 | 1 |
| 1354 | 0 | 40,43 | Vaginale partus   | 2 | 1 |
| 1355 | 0 | 39,28 | Secundaire sectio | 2 | 1 |
| 1356 | 0 | 39,28 | Secundaire sectio | 2 | 1 |
| 1357 | 0 | 39,28 | Secundaire sectio | 2 | 1 |
| 1358 | 0 | 40,14 | Vaginale partus   | 0 | 1 |
| 1359 | 0 | 40,14 | Vaginale partus   | 0 | 1 |
| 1360 | 0 | 41,14 | Vaginale partus   | 0 | 1 |
| 1361 | 0 | 41,14 | Vaginale partus   | 0 | 1 |
| 1362 | 0 | 39,57 | vaginaal          | 0 | 1 |
| 1363 | 0 | 41,43 | Vaginale partus   | 0 | 1 |
| 1364 | 0 | 41,43 | Vaginale partus   | 0 | 1 |
| 1365 | 0 | 37,57 | Vaginale partus   | 0 | 1 |
| 1366 | 0 | 37,57 | Vaginale partus   | 0 | 1 |
| 1367 | 0 | 39,28 | Vaginale partus   | 1 | 1 |
| 1368 | 0 | 39,28 | Vaginale partus   | 1 | 1 |
| 1369 | 0 | 40,14 | Vaginale partus   | 1 | 1 |
| 1370 | 0 | 40,14 | Vaginale partus   | 1 | 1 |
| 1371 | 0 | 41,28 | vaginaal          | 1 | 1 |
| 1372 | 0 | 40,57 | Vaginale partus   | 1 | 1 |
| 1373 | 0 | 40,57 | Vaginale partus   | 1 | 1 |
| 1374 | 0 | 40,14 | Vaginale partus   | 1 | 1 |
| 1375 | 0 | 40,14 | Vaginale partus   | 1 | 1 |
| 1376 | 0 | 40,14 | Vaginale partus   | 0 | 1 |
| 1377 | 0 | 40,14 | Vaginale partus   | 0 | 1 |
| 1378 | 0 | 38,28 | Vaginale partus   | 1 | 1 |
| 1379 | 0 | 38,28 | Vaginale partus   | 1 | 1 |
| 1380 | 0 | 40,57 | Vaginale partus   | 0 | 1 |
| 1381 | 0 | 39,57 | vaginaal          | 0 | 1 |
| 1382 | 0 | 37,57 | Vaginale partus   | 0 | 1 |
| 1383 | 0 | 37,57 | Vaginale partus   | 0 | 1 |
| 1384 | 0 | 39,86 | Vaginale partus   | 0 | 1 |
| 1385 | 0 | 39,86 | Vaginale partus   | 0 | 1 |

|      |   |       |                 |   |   |
|------|---|-------|-----------------|---|---|
| 1386 | 0 | 40    | Vaginale partus | 2 | 1 |
| 1387 | 0 | 40    | Vaginale partus | 2 | 1 |
| 1388 | 0 | 40    | Vaginale partus | 2 | 1 |
| 1389 | 0 | 38,57 | Primaire sectio | 0 | 1 |
| 1390 | 0 | 38,57 | Primaire sectio | 0 | 1 |
| 1391 | 0 | 39,43 | Vaginale partus | 1 | 1 |
| 1392 | 0 | 39,43 | Vaginale partus | 1 | 1 |
| 1393 | 0 | 41    | Vaginale partus | 0 | 1 |
| 1394 | 0 | 41    | Vaginale partus | 0 | 1 |
| 1395 | 0 | 39    | prim.sectio     | 0 | 1 |
| 1396 | 0 | 40,28 | Vaginale partus | 0 | 1 |
| 1397 | 0 | 40,28 | Vaginale partus | 0 | 1 |
| 1398 | 0 | 40,28 | Vaginale partus | 0 | 1 |
| 1399 | 0 | 38,72 | Vaginale partus | 0 | 1 |
| 1400 | 0 | 38,72 | Vaginale partus | 0 | 1 |
| 1401 | 0 | 40    | vaginaal        | 1 | 1 |
| 1402 | 0 | 37,57 | Primaire sectio | 0 | 1 |
| 1403 | 0 | 37,57 | Primaire sectio | 0 | 1 |
| 1404 | 0 | 39,43 | vaginaal        | 0 | 1 |
| 1405 | 0 | 37,86 | prim.sectio     | 0 | 1 |
| 1406 | 0 | 40    | vaginaal        | 0 | 1 |
| 1407 | 0 | 39,28 | Vaginale partus | 0 | 1 |
| 1408 | 0 | 39,28 | Vaginale partus | 0 | 1 |
| 1409 | 0 | 39,14 | Vaginale partus | 0 | 1 |
| 1410 | 0 | 39,14 | Vaginale partus | 0 | 1 |
| 1411 | 0 | 36,72 | sec.sectio      | 0 | 1 |
| 1412 | 0 | 38,14 | Vaginale partus | 1 | 1 |
| 1413 | 0 | 38,14 | Vaginale partus | 1 | 1 |
| 1414 | 0 | 37,86 | Vaginale partus | 0 | 1 |
| 1415 | 0 | 37,86 | Vaginale partus | 0 | 1 |
| 1416 | 0 | 39,28 | Vaginale partus | 0 | 1 |
| 1417 | 0 | 37,43 | Vaginale partus | 1 | 1 |
| 1418 | 0 | 37,43 | Vaginale partus | 1 | 1 |

|      |   |       |                   |   |   |
|------|---|-------|-------------------|---|---|
| 1419 | 0 | 37,72 | vaginaal          | 1 | 1 |
| 1420 | 0 | 34,86 | Secundaire sectio | 0 | 1 |
| 1421 | 0 | 35,86 | vaginaal          | 0 | 1 |
| 1422 | 0 | 36,86 | Vaginale partus   | 0 | 1 |
| 1423 | 0 | 36,86 | Vaginale partus   | 0 | 1 |
| 1424 | 0 | 34,14 | Vaginale partus   | 0 | 1 |
| 1425 | 0 | 34,14 | Vaginale partus   | 0 | 1 |
| 1426 | 0 | 36,43 | Secundaire sectio | 1 | 1 |
| 1427 | 0 | 36,43 | Secundaire sectio | 1 | 1 |
| 1428 | 0 | 36,86 | Vaginale partus   | 1 | 1 |
| 1429 | 0 | 36,86 | Vaginale partus   | 1 | 1 |
| 1430 | 0 | 34,86 | Secundaire sectio | 1 | 1 |
| 1431 | 0 | 34,86 | Secundaire sectio | 1 | 1 |
| 1432 | 0 | 35,57 | Vaginale partus   | 0 | 1 |
| 1433 | 0 | 35,57 | Vaginale partus   | 0 | 1 |
| 1434 | 0 | 36    | Vaginale partus   | 0 | 1 |
| 1435 | 0 | 36    | Vaginale partus   | 0 | 1 |
| 1436 | 0 | 36,14 | Vaginale partus   | 0 | 1 |
| 1437 | 0 | 36,14 | Vaginale partus   | 0 | 1 |
| 1438 | 0 | 36,14 | Vaginale partus   | 0 | 1 |
| 1439 | 0 | 36,57 | Vaginale partus   | 0 | 1 |
| 1440 | 0 | 36,57 | Vaginale partus   | 0 | 1 |
| 1441 | 0 | 36,57 | Vaginale partus   | 0 | 1 |
| 1442 | 0 | 36,57 | Vaginale partus   | 0 | 1 |
| 1443 | 0 | 36,57 | Vaginale partus   | 0 | 1 |
| 1444 | 0 | 36,57 | Vaginale partus   | 0 | 1 |
| 1445 | 0 | 36    | Vaginale partus   | 0 | 1 |
| 1446 | 0 | 36    | Vaginale partus   | 0 | 1 |
| 1447 | 0 | 36    | Vaginale partus   | 0 | 1 |
| 1448 | 0 | 36    | Vaginale partus   | 0 | 1 |
| 1449 | 0 | 36,57 | Vaginale partus   | 0 | 1 |
| 1450 | 0 | 36,57 | Vaginale partus   | 0 | 1 |
| 1451 | 0 | 36,28 | Vaginale partus   | 0 | 1 |

|      |   |       |                   |   |   |
|------|---|-------|-------------------|---|---|
| 1452 | 0 | 36,28 | Vaginale partus   | 0 | 1 |
| 1453 | 0 | 33,28 | vaginaal          | 0 | 1 |
| 1454 | 0 | 30,43 | Vaginale partus   | 0 | 1 |
| 1455 | 1 | 33,72 | Vaginale partus   | 2 | 1 |
| 1456 | 1 | 33,72 | Vaginale partus   | 2 | 1 |
| 1457 | 1 | 33,72 | Vaginale partus   | 2 | 1 |
| 1458 | 0 | 38,14 | Vaginale partus   | 0 | 1 |
| 1459 | 0 | 38,14 | Vaginale partus   | 0 | 1 |
| 1460 | 0 | 31,14 | Secundaire sectio | 0 | 1 |
| 1461 | 0 | 31,14 | Secundaire sectio | 0 | 1 |
| 1462 | 0 | 32,86 | Secundaire sectio | 0 | 1 |
| 1463 | 0 | 33,86 | Secundaire sectio | 0 | 1 |
| 1464 | 0 | 33,86 | Secundaire sectio | 0 | 1 |
| 1465 | 0 | 35,86 | Vaginale partus   | 0 | 1 |
| 1466 | 0 | 35,86 | Vaginale partus   | 0 | 1 |
| 1467 | 0 | 32,72 | Vaginale partus   | 2 | 1 |
| 1468 | 0 | 32,72 | Vaginale partus   | 2 | 1 |
| 1469 | 0 | 32,72 | Vaginale partus   | 2 | 1 |
| 1470 | 0 | 29,72 | vaginaal          | 0 | 1 |
| 1471 | 0 | 38,72 | vaginaal          | 0 | 1 |
| 1472 | 0 | 40,86 | vaginaal          | 0 | 1 |
| 1473 | 0 | 40,14 | prim.sectio       | 2 | 1 |
| 1474 | 0 | 38,57 | Vaginale partus   | 0 | 1 |
| 1475 | 0 | 40,14 | Vaginale partus   | 0 | 1 |
| 1476 | 0 | 40,14 | Vaginale partus   | 0 | 1 |
| 1477 | 0 | 38,28 | Primaire sectio   | 1 | 1 |
| 1478 | 0 | 39,57 | Vaginale partus   | 0 | 1 |
| 1479 | 0 | 38,57 | Vaginale partus   | 0 | 1 |
| 1480 | 0 | 39,57 | Vaginale partus   | 0 | 1 |
| 1481 | 0 | 38,43 | Vaginale partus   | 0 | 1 |
| 1482 | 0 | 38,43 | Vaginale partus   | 0 | 1 |
| 1483 | 0 | 38,43 | Vaginale partus   | 0 | 1 |
| 1484 | 0 | 38,43 | Vaginale partus   | 0 | 1 |



|      |   |       |                   |   |   |
|------|---|-------|-------------------|---|---|
| 1485 | 0 | 38,14 | Secundaire sectio | 0 | 1 |
| 1486 | 0 | 39,28 | Vaginale partus   | 0 | 1 |
| 1487 | 0 | 39,28 | Vaginale partus   | 0 | 1 |
| 1488 | 0 | 39,43 | Vaginale partus   | 0 | 1 |
| 1489 | 0 | 41    | Vaginale partus   | 0 | 1 |
| 1490 | 0 | 40,14 | Vaginale partus   | 0 | 1 |
| 1491 | 0 | 40,14 | Vaginale partus   | 0 | 1 |
| 1492 | 0 | 39,86 | Vaginale partus   | 0 | 1 |
| 1493 | 0 | 40,28 | Vaginale partus   | 0 | 1 |
| 1494 | 0 | 40,28 | Vaginale partus   | 0 | 1 |
| 1495 | 0 | 39,86 | Vaginale partus   | 0 | 1 |
| 1496 | 0 | 38,43 | Repeat sectio     | 0 | 1 |
| 1497 | 0 | 38,43 | Repeat sectio     | 0 | 1 |
| 1498 | 0 | 39    | Vaginale partus   | 0 | 1 |
| 1499 | 0 | 39    | Vaginale partus   | 0 | 1 |
| 1500 | 0 | 38,57 | Vaginale partus   | 0 | 1 |
| 1501 | 0 | 38,57 | Vaginale partus   | 0 | 1 |
| 1502 | 0 | 38,57 | Vaginale partus   | 0 | 1 |
| 1503 | 0 | 38,43 | Vaginale partus   | 0 | 1 |
| 1504 | 0 | 39,57 | Repeat sectio     | 0 | 1 |
| 1505 | 0 | 38,43 | Vaginale partus   | 0 | 1 |
| 1506 | 0 | 38,72 | Vaginale partus   | 0 | 1 |
| 1507 | 0 | 38,72 | Vaginale partus   | 0 | 1 |
| 1508 | 0 | 41    | Vaginale partus   | 0 | 1 |
| 1509 | 0 | 40    | Vaginale partus   | 0 | 1 |
| 1510 | 0 | 40,72 | Vaginale partus   | 0 | 1 |
| 1511 | 0 | 40    | Vaginale partus   | 0 | 1 |
| 1512 | 0 | 41    | Vaginale partus   | 0 | 1 |
| 1513 | 0 | 38    | Vaginale partus   | 0 | 1 |
| 1514 | 0 | 40,57 | Vaginale partus   | 0 | 1 |
| 1515 | 0 | 40,57 | Vaginale partus   | 0 | 1 |
| 1516 | 0 | 38,14 | Vaginale partus   | 0 | 1 |
| 1517 | 0 | 38    | Vaginale partus   | 0 | 1 |

|      |   |       |                   |   |   |
|------|---|-------|-------------------|---|---|
| 1518 | 0 | 38,14 | Vaginale partus   | 0 | 1 |
| 1519 | 0 | 41    | Vaginale partus   | 0 | 1 |
| 1520 | 0 | 41,14 |                   | 0 | 1 |
| 1521 | 0 | 41,14 |                   | 0 | 1 |
| 1522 | 0 | 39,72 | Vaginale partus   | 0 | 1 |
| 1523 | 0 | 36,57 | Vaginale partus   | 0 | 1 |
| 1524 | 0 | 36,57 | Vaginale partus   | 0 | 1 |
| 1525 | 0 | 40,43 | Vaginale partus   | 0 | 1 |
| 1526 | 0 | 38,72 | Vaginale partus   | 0 | 1 |
| 1527 | 0 | 40,43 | Vaginale partus   | 0 | 1 |
| 1528 | 0 | 38,72 | Vaginale partus   | 0 | 1 |
| 1529 | 0 | 40,14 | Secundaire sectio | 0 | 1 |
| 1530 | 0 | 40,14 | Secundaire sectio | 0 | 1 |
| 1531 | 0 | 39,43 | Vaginale partus   | 0 | 1 |
| 1532 | 0 | 39,14 | Primaire sectio   | 0 | 1 |
| 1533 | 0 | 39,14 | Primaire sectio   | 0 | 1 |
| 1534 | 0 | 39,86 | Vaginale partus   | 0 | 1 |
| 1535 | 0 | 39,86 | Vaginale partus   | 0 | 1 |
| 1536 | 0 | 40,43 | Vaginale partus   | 0 | 1 |
| 1537 | 0 | 38,14 | Vaginale partus   | 0 | 1 |
| 1538 | 0 | 38,14 | Vaginale partus   | 0 | 1 |
| 1539 | 0 | 38,57 | Vaginale partus   | 0 | 1 |
| 1540 | 0 | 40    | Vaginale partus   | 0 | 1 |
| 1541 | 0 | 40    | Vaginale partus   | 0 | 1 |
| 1542 | 0 | 38,57 | Vaginale partus   | 0 | 1 |
| 1543 | 0 | 40,43 | Vaginale partus   | 0 | 1 |
| 1544 | 0 | 39,28 | Vaginale partus   | 0 | 1 |
| 1545 | 0 | 39,57 | Vaginale partus   | 0 | 1 |
| 1546 | 0 | 39,28 | Vaginale partus   | 0 | 1 |
| 1547 | 0 | 41,43 | Vaginale partus   | 0 | 1 |
| 1548 | 0 | 41,43 | Vaginale partus   | 0 | 1 |
| 1549 | 0 | 39,86 | Primaire sectio   | 0 | 1 |
| 1550 | 0 | 38,14 | Vaginale partus   | 0 | 1 |

|      |   |       |                   |   |   |
|------|---|-------|-------------------|---|---|
| 1551 | 0 | 38,14 | Vaginale partus   | 0 | 1 |
| 1552 | 0 | 39,14 | Vaginale partus   | 0 | 1 |
| 1553 | 0 | 39,14 | Vaginale partus   | 0 | 1 |
| 1554 | 0 | 41,57 | Secundaire sectio | 0 | 1 |
| 1555 | 0 | 41,57 | Secundaire sectio | 0 | 1 |
| 1556 | 0 | 40,57 | Vaginale partus   | 0 | 1 |
| 1557 | 0 | 36    | Vaginale partus   | 0 | 1 |
| 1558 | 0 | 36    | Vaginale partus   | 0 | 1 |
| 1559 | 0 | 40,57 | Vaginale partus   | 0 | 1 |
| 1560 | 0 | 38,14 | Secundaire sectio | 0 | 1 |
| 1561 | 0 | 39,43 | Vaginale partus   | 0 | 1 |
| 1562 | 0 | 38,14 | Vaginale partus   | 0 | 1 |
| 1563 | 0 | 38,14 | Vaginale partus   | 0 | 1 |
| 1564 | 0 | 39,43 | Vaginale partus   | 0 | 1 |
| 1565 | 0 | 40    | Vaginale partus   | 0 | 1 |
| 1566 | 0 | 40    | Vaginale partus   | 0 | 1 |
| 1567 | 0 | 40,86 | Vaginale partus   | 0 | 1 |
| 1568 | 0 | 40,86 | Vaginale partus   | 0 | 1 |
| 1569 | 0 | 38,28 | Primaire sectio   | 0 | 1 |
| 1570 | 0 | 39,43 | Vaginale partus   | 0 | 1 |
| 1571 | 0 | 41,57 | Vaginale partus   | 0 | 1 |
| 1572 | 0 | 37,43 | Vaginale partus   | 0 | 1 |
| 1573 | 0 | 40,14 | Secundaire sectio | 0 | 1 |
| 1574 | 0 | 39,43 | Vaginale partus   | 0 | 1 |
| 1575 | 0 | 37,43 | Vaginale partus   | 0 | 1 |
| 1576 | 0 | 41,57 | Vaginale partus   | 0 | 1 |
| 1577 | 0 | 40,14 | Secundaire sectio | 0 | 1 |
| 1578 | 0 | 40    | Vaginale partus   | 0 | 1 |
| 1579 | 0 | 40    | Vaginale partus   | 0 | 1 |
| 1580 | 0 | 35,43 | Vaginale partus   | 0 | 1 |
| 1581 | 0 | 35,43 | Vaginale partus   | 0 | 1 |
| 1582 | 0 | 40    | Vaginale partus   | 0 | 1 |
| 1583 | 0 | 39,86 | Vaginale partus   | 0 | 1 |

|      |   |       |                 |   |   |
|------|---|-------|-----------------|---|---|
| 1584 | 0 | 39,86 | Vaginale partus | 0 | 1 |
| 1585 | 0 | 37,28 | Vaginale partus | 0 | 1 |
| 1586 | 0 | 40    | Vaginale partus | 0 | 1 |
| 1587 | 0 | 37,28 | Vaginale partus | 0 | 1 |
| 1588 | 0 | 40,72 | Vaginale partus | 0 | 1 |
| 1589 | 0 | 40,72 | Vaginale partus | 0 | 1 |
| 1590 | 0 | 39,86 | Vaginale partus | 0 | 1 |
| 1591 | 0 | 39,86 | Vaginale partus | 0 | 1 |
| 1592 | 0 | 39,86 | Vaginale partus | 0 | 1 |
| 1593 | 0 | 39,86 | Vaginale partus | 0 | 1 |
| 1594 | 0 | 40    | Vaginale partus | 0 | 1 |
| 1595 | 0 | 40    | Vaginale partus | 0 | 1 |
| 1596 | 0 | 38,72 | Primaire sectio | 0 | 1 |
| 1597 | 0 | 41    | Vaginale partus | 0 | 1 |
| 1598 | 0 | 38,28 | Vaginale partus | 0 | 1 |
| 1599 | 0 | 40,72 | Vaginale partus | 0 | 1 |
| 1600 | 0 | 40,72 | Vaginale partus | 0 | 1 |
| 1601 | 0 | 38,86 | Repeat sectio   | 0 | 1 |
| 1602 | 0 | 38,86 | Repeat sectio   | 0 | 1 |
| 1603 | 0 | 38,28 | Vaginale partus | 0 | 1 |
| 1604 | 0 | 39,57 | Vaginale partus | 0 | 1 |
| 1605 | 0 | 40,28 | Vaginale partus | 0 | 1 |
| 1606 | 0 | 35,57 | Vaginale partus | 0 | 1 |
| 1607 | 0 | 38,14 | Primaire sectio | 0 | 1 |
| 1608 | 0 | 40,28 | Vaginale partus | 0 | 1 |
| 1609 | 0 | 40,57 | Vaginale partus | 0 | 1 |
| 1610 | 0 | 39,72 | Vaginale partus | 0 | 1 |
| 1611 | 0 | 39,72 | Vaginale partus | 0 | 1 |
| 1612 | 0 | 38,86 | Vaginale partus | 0 | 1 |
| 1613 | 0 | 35,57 | Vaginale partus | 0 | 1 |
| 1614 | 0 | 40,57 | Vaginale partus | 0 | 1 |
| 1615 | 0 | 38,14 | Primaire sectio | 0 | 1 |
| 1616 | 0 | 38,86 | Vaginale partus | 0 | 1 |

|      |   |       |                   |   |   |
|------|---|-------|-------------------|---|---|
| 1617 | 0 | 39,86 | Vaginale partus   | 0 | 1 |
| 1618 | 0 | 39,86 | Vaginale partus   | 0 | 1 |
| 1619 | 0 | 41,14 | Secundaire sectio | 0 | 1 |
| 1620 | 0 | 41,14 | Secundaire sectio | 0 | 1 |
| 1621 | 0 | 38,86 | Primaire sectio   | 0 | 1 |
| 1622 | 0 | 38,86 | Primaire sectio   | 0 | 1 |
| 1623 | 0 | 41,28 | Vaginale partus   | 0 | 1 |
| 1624 | 0 | 38    | Vaginale partus   | 0 | 1 |
| 1625 | 0 | 41,28 | Vaginale partus   | 0 | 1 |
| 1626 | 0 | 39,86 | Vaginale partus   | 0 | 1 |
| 1627 | 0 | 40,86 | Vaginale partus   | 0 | 1 |
| 1628 | 0 | 39,86 | Vaginale partus   | 0 | 1 |
| 1629 | 0 | 38,86 | Vaginale partus   | 0 | 1 |
| 1630 | 0 | 38,86 | Vaginale partus   | 0 | 1 |
| 1631 | 0 | 39,14 | Vaginale partus   | 0 | 1 |
| 1632 | 0 | 40,14 | Vaginale partus   | 0 | 1 |
| 1633 | 0 | 40,14 | Vaginale partus   | 0 | 1 |
| 1634 | 0 | 37,57 | Vaginale partus   | 0 | 1 |
| 1635 | 0 | 39,14 | Vaginale partus   | 0 | 1 |
| 1636 | 0 | 37,57 | Vaginale partus   | 0 | 1 |
| 1637 | 0 | 40    | Vaginale partus   | 0 | 1 |
| 1638 | 0 | 41,43 | Vaginale partus   | 0 | 1 |
| 1639 | 0 | 41,43 | Vaginale partus   | 0 | 1 |
| 1640 | 0 | 40,43 | Vaginale partus   | 0 | 1 |
| 1641 | 0 | 40,72 | Vaginale partus   | 0 | 1 |
| 1642 | 0 | 40,43 | Vaginale partus   | 0 | 1 |
| 1643 | 0 | 39,14 | Vaginale partus   | 0 | 1 |
| 1644 | 0 | 39,72 | Vaginale partus   | 0 | 1 |
| 1645 | 0 | 39,72 | Vaginale partus   | 0 | 1 |
| 1646 | 0 | 39,14 | Vaginale partus   | 0 | 1 |
| 1647 | 0 | 40,86 | Vaginale partus   | 0 | 1 |
| 1648 | 0 | 40,86 | Vaginale partus   | 0 | 1 |
| 1649 | 0 | 39,28 | Secundaire sectio | 0 | 1 |

|      |   |       |                   |   |   |
|------|---|-------|-------------------|---|---|
| 1650 | 0 | 39,28 | Secundaire sectio | 0 | 1 |
| 1651 | 0 | 39,86 | Primaire sectio   | 0 | 1 |
| 1652 | 0 | 39,86 | Primaire sectio   | 0 | 1 |
| 1653 | 0 | 39    | Vaginale partus   | 0 | 1 |
| 1654 | 0 | 40    | Vaginale partus   | 0 | 1 |
| 1655 | 0 | 39,57 | Vaginale partus   | 0 | 1 |
| 1656 | 0 | 41,43 | Vaginale partus   | 0 | 1 |
| 1657 | 0 | 40    | Vaginale partus   | 0 | 1 |
| 1658 | 0 | 39,57 | Vaginale partus   | 0 | 1 |
| 1659 | 0 | 41,43 | Vaginale partus   | 0 | 1 |
| 1660 | 0 | 39    | Vaginale partus   | 0 | 1 |
| 1661 | 0 | 39,57 | Repeat sectio     | 0 | 1 |
| 1662 | 0 | 40,86 | Vaginale partus   | 0 | 1 |
| 1663 | 0 | 40,86 | Vaginale partus   | 0 | 1 |
| 1664 | 0 | 39    | Vaginale partus   | 1 | 1 |
| 1665 | 0 | 39    | Vaginale partus   | 1 | 1 |
| 1666 | 0 | 40,28 | Vaginale partus   | 1 | 1 |
| 1667 | 0 | 40,28 | Vaginale partus   | 1 | 1 |
| 1668 | 0 | 41,14 | Vaginale partus   | 2 | 1 |
| 1669 | 0 | 41,14 | Vaginale partus   | 2 | 1 |
| 1670 | 0 | 39    | Vaginale partus   | 2 | 1 |
| 1671 | 0 | 39    | Vaginale partus   | 2 | 1 |
| 1672 | 0 | 39,86 | Vaginale partus   | 1 | 1 |
| 1673 | 0 | 39,86 | Vaginale partus   | 1 | 1 |
| 1674 | 0 | 39,57 | Vaginale partus   | 1 | 1 |
| 1675 | 0 | 39,57 | Vaginale partus   | 1 | 1 |
| 1676 | 0 | 40,57 | Secundaire sectio | 1 | 1 |
| 1677 | 0 | 39,72 | Secundaire sectio | 0 | 1 |
| 1678 | 0 | 39,72 | Secundaire sectio | 0 | 1 |
| 1679 | 0 | 40,86 | Secundaire sectio | 0 | 1 |
| 1680 | 0 | 40,86 | Secundaire sectio | 0 | 1 |
| 1681 | 0 | 38,28 | Vaginale partus   | 0 | 1 |
| 1682 | 0 | 38,28 | Vaginale partus   | 0 | 1 |

|      |   |       |                   |   |   |
|------|---|-------|-------------------|---|---|
| 1683 | 0 | 40,43 | Vaginale partus   | 0 | 1 |
| 1684 | 0 | 40,43 | Vaginale partus   | 0 | 1 |
| 1685 | 1 | 38,43 | Vaginale partus   | 0 | 1 |
| 1686 | 1 | 38,43 | Vaginale partus   | 0 | 1 |
| 1687 | 1 | 41,28 | Vaginale partus   | 2 | 1 |
| 1688 | 1 | 41,28 | Vaginale partus   | 2 | 1 |
| 1689 | 0 | 40,72 | Vaginale partus   | 1 | 1 |
| 1690 | 0 | 40,72 | Vaginale partus   | 1 | 1 |
| 1691 | 0 | 40,28 | Vaginale partus   | 1 | 1 |
| 1692 | 0 | 40,28 | Vaginale partus   | 1 | 1 |
| 1693 | 0 | 40,28 | Vaginale partus   | 0 | 1 |
| 1694 | 0 | 40,28 | Vaginale partus   | 0 | 1 |
| 1695 | 0 | 40    | Vaginale partus   | 1 | 1 |
| 1696 | 0 | 40    | Vaginale partus   | 1 | 1 |
| 1697 | 0 | 37,86 | Vaginale partus   | 2 | 1 |
| 1698 | 0 | 39,43 | Primaire sectio   | 1 | 1 |
| 1699 | 0 | 39,43 | Primaire sectio   | 1 | 1 |
| 1700 | 0 | 33,14 | Primaire sectio   | 0 | 2 |
| 1701 | 0 | 23,14 | Vaginale partus   | 0 | 2 |
| 1702 | 0 | 33,72 | Primaire sectio   | 0 | 2 |
| 1703 | 0 | 26,57 | Secundaire sectio | 0 | 2 |
| 1704 | 0 | 31,28 | Primaire sectio   | 0 | 2 |
| 1705 | 0 | 26,14 | Primaire sectio   | 0 | 2 |
| 1706 | 0 | 27,28 | Primaire sectio   | 0 | 2 |
| 1707 | 0 | 28,14 | Secundaire sectio | 0 | 2 |
| 1708 | 0 | 30    | Primaire sectio   | 0 | 2 |
| 1709 | 0 | 31,57 | Secundaire sectio | 0 | 2 |
| 1710 | 0 | 32,43 | Secundaire sectio | 0 | 2 |
| 1711 | 0 | 32,86 | Primaire sectio   | 0 | 2 |
| 1712 | 0 | 29    | Primaire sectio   | 0 | 2 |
| 1713 | 0 | 27    | Primaire sectio   | 0 | 2 |
| 1714 | 0 | 30,57 | Vaginale partus   | 0 | 2 |
| 1715 | 0 | 27    | Primaire sectio   | 0 | 2 |

|      |   |       |                   |   |   |
|------|---|-------|-------------------|---|---|
| 1716 | 0 | 28,28 | Primaire sectio   | 0 | 2 |
| 1717 | 0 | 31,57 | Secundaire sectio | 0 | 2 |
| 1718 | 0 | 31,28 | Primaire sectio   | 0 | 2 |
| 1719 | 0 | 31,57 | Secundaire sectio | 0 | 2 |
| 1720 | 0 | 31,72 | Secundaire sectio | 0 | 2 |
| 1721 | 0 | 33,28 | Repeat sectio     | 0 | 2 |
| 1722 | 0 | 31    | Vaginale partus   | 0 | 2 |
| 1723 | 0 | 30,72 | Secundaire sectio | 0 | 2 |
| 1724 | 0 | 26,86 |                   | 2 | 2 |
| 1725 | 0 | 33,72 | Repeat sectio     | 2 | 2 |
| 1726 | 0 | 31,57 | Primaire sectio   | 2 | 2 |
| 1727 | 0 | 31,86 | Vaginale partus   | 2 | 2 |
| 1728 | 0 | 33,72 | Vaginale partus   | 1 | 2 |
| 1729 | 0 | 28,72 | Primaire sectio   | 2 | 2 |
| 1730 | 0 | 31,72 | Secundaire sectio | 1 | 2 |
| 1731 | 0 | 26,28 | Primaire sectio   | 1 | 2 |
| 1732 | 0 | 33,14 | Primaire sectio   | 2 | 2 |
| 1733 | 0 | 33,14 | Primaire sectio   | 2 | 2 |
| 1734 | 0 | 33,43 |                   | 0 | 2 |
| 1735 | 0 | 27,43 | prim.sectio       | 0 | 2 |
| 1736 | 0 | 29,43 | Vaginale partus   | 1 | 2 |
| 1737 | 0 | 33,43 | Repeat sectio     | 2 | 2 |
| 1738 | 0 | 33,43 | Repeat sectio     | 2 | 2 |
| 1739 | 0 | 33,43 | Repeat sectio     | 2 | 2 |
| 1740 | 0 | 32,43 | Primaire sectio   | 2 | 2 |
| 1741 | 0 | 32,43 | Primaire sectio   | 2 | 2 |
| 1742 | 0 | 32,43 | Primaire sectio   | 2 | 2 |
| 1743 | 0 | 33,57 | Vaginale partus   | 0 | 2 |
| 1744 | 0 | 33,57 | Vaginale partus   | 1 | 2 |
| 1745 | 0 | 27,14 | Primaire sectio   | 0 | 2 |
| 1746 | 0 | 27    | Primaire sectio   | 0 | 2 |
| 1747 | 0 | 27    | Primaire sectio   | 0 | 2 |
| 1748 | 0 | 33,14 | Secundaire sectio | 0 | 2 |



|      |   |       |                   |   |   |
|------|---|-------|-------------------|---|---|
| 1749 | 0 | 29,14 | Primaire sectio   | 1 | 2 |
| 1750 | 0 | 32,72 | Secundaire sectio | 0 | 2 |
| 1751 | 0 | 32    | Primaire sectio   | 2 | 2 |
| 1752 | 0 | 32    | Primaire sectio   | 2 | 2 |
| 1753 | 0 | 33    | vaginaal          | 2 | 2 |
| 1754 | 0 | 27,14 | Vaginale partus   | 2 | 2 |
| 1755 | 0 | 27,14 | Vaginale partus   | 2 | 2 |
| 1756 | 0 | 31,72 |                   | 2 | 2 |
| 1757 | 0 | 31,72 |                   | 2 | 2 |
| 1758 | 0 | 33,14 | vaginaal          | 0 | 2 |
| 1759 | 0 | 27,14 | prim.sectio       | 0 | 2 |
| 1760 | 0 | 25    | vaginaal          | 0 | 2 |
| 1761 | 0 | 32,14 | prim.sectio       | 0 | 2 |
| 1762 | 0 | 33,28 | prim.sectio       | 0 | 2 |
| 1763 | 0 | 32,57 | prim.sectio       | 0 | 2 |
| 1764 | 0 | 26,28 | sec.sectio        | 0 | 2 |
| 1765 | 0 | 32,14 | vaginaal          | 0 | 2 |
| 1766 | 0 | 33,28 | vaginaal          | 0 | 2 |
| 1767 | 0 | 31,14 | sec.sectio        | 0 | 2 |
| 1768 | 0 | 31,57 | prim.sectio       | 0 | 2 |
| 1769 | 0 | 33,43 | vaginaal          | 0 | 2 |
| 1770 | 0 | 33    | sec.sectio        | 0 | 2 |
| 1771 | 0 | 33,72 | vaginaal          | 0 | 2 |
| 1772 | 0 | 27,43 | prim.sectio       | 0 | 2 |
| 1773 | 0 | 32,14 | sec.sectio        | 0 | 2 |
| 1774 | 0 | 27,43 | prim.sectio       | 0 | 2 |
| 1775 | 0 | 27,86 | prim.sectio       | 0 | 2 |
| 1776 | 0 | 29,86 | prim.sectio       | 0 | 2 |
| 1777 | 0 | 33,14 | prim.sectio       | 0 | 2 |
| 1778 | 0 | 27,86 | prim.sectio       | 0 | 2 |
| 1779 | 0 | 22,86 |                   | 0 | 2 |
| 1780 | 0 | 33,86 | prim.sectio       | 1 | 2 |
| 1781 | 0 | 32,57 | sec.sectio        | 1 | 2 |

|      |   |       |                   |   |   |
|------|---|-------|-------------------|---|---|
| 1782 | 0 | 31,14 | prim.sectio       | 0 | 2 |
| 1783 | 0 | 27,43 | prim.sectio       | 0 | 2 |
| 1784 | 0 | 30,28 | prim.sectio       | 0 | 2 |
| 1785 | 0 | 26,28 | Primaire sectio   | 2 | 2 |
| 1786 | 0 | 26,28 | Primaire sectio   | 2 | 2 |
| 1787 | 0 | 34,43 | Primaire sectio   | 0 | 3 |
| 1788 | 0 | 38    | Secundaire sectio | 0 | 3 |
| 1789 | 0 | 34    | Primaire sectio   | 0 | 3 |
| 1790 | 0 | 35,57 | Primaire sectio   | 0 | 3 |
| 1791 | 0 | 37,57 | Vaginale partus   | 0 | 3 |
| 1792 | 0 | 38,86 | Secundaire sectio | 0 | 3 |
| 1793 | 0 | 39,28 | Vaginale partus   | 0 | 3 |
| 1794 | 0 | 36,43 | Vaginale partus   | 0 | 3 |
| 1795 | 0 | 34,86 | Vaginale partus   | 0 | 3 |
| 1796 | 0 | 39,72 | Repeat sectio     | 0 | 3 |
| 1797 | 0 | 39,57 | Kunstverlossing   | 0 | 3 |
| 1798 | 0 | 37,28 | Vaginale partus   | 0 | 3 |
| 1799 | 0 | 36    | Vaginale partus   | 0 | 3 |
| 1800 | 0 | 39,57 | Vaginale partus   | 0 | 3 |
| 1801 | 0 | 38,14 | Vaginale partus   | 0 | 3 |
| 1802 | 0 | 40,28 | Vaginale partus   | 0 | 3 |
| 1803 | 0 | 38,28 | Vaginale partus   | 0 | 3 |
| 1804 | 0 | 39,72 | Secundaire sectio | 0 | 3 |
| 1805 | 0 | 36,28 | Secundaire sectio | 0 | 3 |
| 1806 | 0 | 38    | Secundaire sectio | 0 | 3 |
| 1807 | 0 | 37,14 | Vaginale partus   | 0 | 3 |
| 1808 | 0 | 38,14 | Vaginale partus   | 0 | 3 |
| 1809 | 0 | 35,57 | Vaginale partus   | 0 | 3 |
| 1810 | 0 | 40,14 | Secundaire sectio | 0 | 3 |
| 1811 | 0 | 38,72 | Vaginale partus   | 0 | 3 |
| 1812 | 0 | 39    | Secundaire sectio | 0 | 3 |
| 1813 | 0 | 39,14 | Primaire sectio   | 0 | 3 |
| 1814 | 0 | 38,28 | Vaginale partus   | 0 | 3 |

|      |   |       |                   |   |   |
|------|---|-------|-------------------|---|---|
| 1815 | 0 | 37,86 | Repeat sectio     | 0 | 3 |
| 1816 | 0 | 37,72 | Primaire sectio   | 0 | 3 |
| 1817 | 0 | 38,86 | Vaginale partus   | 0 | 3 |
| 1818 | 0 | 39    | Vaginale partus   | 0 | 3 |
| 1819 | 0 | 38,57 | Vaginale partus   | 0 | 3 |
| 1820 | 0 | 38,86 | Kunstverlossing   | 0 | 3 |
| 1821 | 0 | 37    | Vaginale partus   | 0 | 3 |
| 1822 | 0 | 38,43 | Vaginale partus   | 0 | 3 |
| 1823 | 0 | 37,72 |                   | 0 | 3 |
| 1824 | 0 | 35,72 | Vaginale partus   | 0 | 3 |
| 1825 | 0 | 38    | Vaginale partus   | 0 | 3 |
| 1826 | 0 | 37,72 | Vaginale partus   | 0 | 3 |
| 1827 | 0 | 36,28 | Vaginale partus   | 0 | 3 |
| 1828 | 0 | 39,86 | Vaginale partus   | 0 | 3 |
| 1829 | 0 | 39    | Secundaire sectio | 0 | 3 |
| 1830 | 0 | 38,43 | Repeat sectio     | 0 | 3 |
| 1831 | 0 | 39,86 | Repeat sectio     | 0 | 3 |
| 1832 | 0 | 36    | Vaginale partus   | 0 | 3 |
| 1833 | 0 | 37,28 | Secundaire sectio | 0 | 3 |
| 1834 | 0 | 37,28 | Secundaire sectio | 0 | 3 |
| 1835 | 0 | 38,72 | Vaginale partus   | 0 | 3 |
| 1836 | 0 | 39,43 | Vaginale partus   | 0 | 3 |
| 1837 | 0 | 34,14 | Secundaire sectio | 2 | 3 |
| 1838 | 0 | 37    | Vaginale partus   | 2 | 3 |
| 1839 | 0 | 38,14 |                   | 2 | 3 |
| 1840 | 0 | 38,14 |                   | 2 | 3 |
| 1841 | 0 | 38,14 | Secundaire sectio | 2 | 3 |
| 1842 | 0 | 37,43 | Vaginale partus   | 2 | 3 |
| 1843 | 0 | 37,43 | Vaginale partus   | 2 | 3 |
| 1844 | 0 | 34,28 | Secundaire sectio | 2 | 3 |
| 1845 | 0 | 34,28 |                   | 2 | 3 |
| 1846 | 0 | 37,72 | Kunstverlossing   | 2 | 3 |
| 1847 | 0 | 37,28 | Vaginale partus   | 2 | 3 |

|      |   |       |                   |   |   |
|------|---|-------|-------------------|---|---|
| 1848 | 0 | 37    | Primaire sectio   | 2 | 3 |
| 1849 | 0 | 37    | Primaire sectio   | 2 | 3 |
| 1850 | 0 | 37,14 |                   | 2 | 3 |
| 1851 | 0 | 37,14 |                   | 2 | 3 |
| 1852 | 0 | 37,14 |                   | 2 | 3 |
| 1853 | 0 | 41    | Secundaire sectio | 1 | 3 |
| 1854 | 0 | 39,43 | Kunstverlossing   | 2 | 3 |
| 1855 | 0 | 37    | Vaginale partus   | 2 | 3 |
| 1856 | 0 | 34,14 | Vaginale partus   | 2 | 3 |
| 1857 | 0 | 34,72 | Vaginale partus   | 2 | 3 |
| 1858 | 0 | 38,72 | Vaginale partus   | 0 | 3 |
| 1859 | 0 | 37,57 | Secundaire sectio | 1 | 3 |
| 1860 | 0 | 37,57 | Secundaire sectio | 1 | 3 |
| 1861 | 0 | 37,57 | Secundaire sectio | 1 | 3 |
| 1862 | 0 | 35,57 | Vaginale partus   | 0 | 3 |
| 1863 | 0 | 38,86 | Vaginale partus   | 0 | 3 |
| 1864 | 0 | 40,14 | Vaginale partus   | 1 | 3 |
| 1865 | 0 | 36,86 | Primaire sectio   | 2 | 3 |
| 1866 | 0 | 39,14 | Primaire sectio   | 0 | 3 |
| 1867 | 0 | 36,28 | Repeat sectio     | 0 | 3 |
| 1868 | 0 | 37,57 | Vaginale partus   | 0 | 3 |
| 1869 | 0 | 36,43 | Primaire sectio   | 2 | 3 |
| 1870 | 0 | 37,72 | Primaire sectio   | 1 | 3 |
| 1871 | 0 | 37,57 |                   | 0 | 3 |
| 1872 | 0 | 39    | Vaginale partus   | 0 | 3 |
| 1873 | 0 | 37,28 | Vaginale partus   | 2 | 3 |
| 1874 | 0 | 34,28 | Secundaire sectio | 0 | 3 |
| 1875 | 0 | 35,72 |                   | 2 | 3 |
| 1876 | 0 | 35,72 |                   | 2 | 3 |
| 1877 | 0 | 35,72 |                   | 2 | 3 |
| 1878 | 0 | 39,14 | Vaginale partus   | 2 | 3 |
| 1879 | 0 | 36,86 | Vaginale partus   | 1 | 3 |
| 1880 | 0 | 37    |                   | 0 | 3 |

|      |   |       |                   |   |   |
|------|---|-------|-------------------|---|---|
| 1881 | 0 | 37,28 | Vaginale partus   | 0 | 3 |
| 1882 | 0 | 37,14 | Vaginale partus   | 0 | 3 |
| 1883 | 0 | 39    | Vaginale partus   | 0 | 3 |
| 1884 | 0 | 37,43 | Secundaire sectio | 0 | 3 |
| 1885 | 0 | 36,14 | Primaire sectio   | 2 | 3 |
| 1886 | 0 | 39,72 | vaginaal          | 2 | 3 |
| 1887 | 0 | 38,72 | Repeat sectio     | 1 | 3 |
| 1888 | 0 | 35,86 | prim.sectio       | 1 | 3 |
| 1889 | 0 | 34,86 | Vaginale partus   | 2 | 3 |
| 1890 | 0 | 34,86 | Vaginale partus   | 2 | 3 |
| 1891 | 0 | 34,86 | Vaginale partus   | 2 | 3 |
| 1892 | 0 | 38    | vaginaal          | 2 | 3 |
| 1893 | 0 | 36,43 | vaginaal          | 2 | 3 |
| 1894 | 0 | 39,86 | Vaginale partus   | 0 | 3 |
| 1895 | 0 | 39,86 | Vaginale partus   | 0 | 3 |
| 1896 | 0 | 39,86 | Vaginale partus   | 0 | 3 |
| 1897 | 0 | 39    | Vaginale partus   | 0 | 3 |
| 1898 | 0 | 39    | Vaginale partus   | 0 | 3 |
| 1899 | 0 | 40,57 | Vaginale partus   | 0 | 3 |
| 1900 | 0 | 40,57 | Vaginale partus   | 0 | 3 |
| 1901 | 0 | 40,57 | Vaginale partus   | 0 | 3 |
| 1902 | 0 | 37,28 | Secundaire sectio | 0 | 3 |
| 1903 | 0 | 37,28 | Secundaire sectio | 0 | 3 |
| 1904 | 0 | 37,28 | Secundaire sectio | 0 | 3 |
| 1905 | 0 | 37,28 | sec.sectio        | 2 | 3 |
| 1906 | 0 | 36,72 | Secundaire sectio | 2 | 3 |
| 1907 | 0 | 36,72 | Secundaire sectio | 2 | 3 |
| 1908 | 0 | 36,72 | Secundaire sectio | 2 | 3 |
| 1909 | 0 | 37,14 |                   | 2 | 3 |
| 1910 | 0 | 37,14 |                   | 2 | 3 |
| 1911 | 0 | 37,14 |                   | 2 | 3 |
| 1912 | 0 | 36    | Primaire sectio   | 2 | 3 |
| 1913 | 0 | 36    | Primaire sectio   | 2 | 3 |

|      |   |       |                 |   |   |
|------|---|-------|-----------------|---|---|
| 1914 | 0 | 36    | Primaire sectio | 2 | 3 |
| 1915 | 0 | 39,43 | Vaginale partus | 1 | 3 |
| 1916 | 0 | 37,57 | Primaire sectio | 2 | 3 |
| 1917 | 0 | 37,57 | Primaire sectio | 2 | 3 |
| 1918 | 0 | 37,57 | Primaire sectio | 2 | 3 |
| 1919 | 0 | 36,72 | vaginaal        | 1 | 3 |
| 1920 | 0 | 36,43 | Vaginale partus | 2 | 3 |
| 1921 | 0 | 36,43 | Vaginale partus | 2 | 3 |
| 1922 | 0 | 39,86 | Vaginale partus | 1 | 3 |
| 1923 | 0 | 37,43 | Primaire sectio | 2 | 3 |
| 1924 | 0 | 37,43 | Primaire sectio | 2 | 3 |
| 1925 | 0 | 37,43 | Primaire sectio | 2 | 3 |
| 1926 | 0 | 38,14 | Vaginale partus | 0 | 3 |
| 1927 | 0 | 38,14 | Vaginale partus | 0 | 3 |
| 1928 | 0 | 40    | Vaginale partus | 0 | 3 |
| 1929 | 0 | 40    | Vaginale partus | 0 | 3 |
| 1930 | 0 | 35,14 | Repeat sectio   | 2 | 3 |
| 1931 | 0 | 35,14 | Repeat sectio   | 2 | 3 |
| 1932 | 0 | 35,14 | Repeat sectio   | 2 | 3 |
| 1933 | 0 | 40,43 | vaginaal        | 0 | 3 |
| 1934 | 0 | 35,72 | prim.sectio     | 2 | 3 |
| 1935 | 0 | 37,28 | vaginaal        | 0 | 3 |
| 1936 | 0 | 36,28 | vaginaal        | 1 | 3 |
| 1937 | 0 | 36,57 | vaginaal        | 1 | 3 |
| 1938 | 0 | 38,86 | vaginaal        | 0 | 3 |
| 1939 | 0 | 36,86 | vaginaal        | 0 | 3 |
| 1940 | 0 | 34    | sectio          | 0 | 3 |
| 1941 | 0 | 39,28 | vaginaal        | 0 | 3 |
| 1942 | 0 | 35,86 | vaginaal        | 0 | 3 |
| 1943 | 0 | 37,14 | vaginaal        | 0 | 3 |
| 1944 | 0 | 36,72 | prim.sectio     | 0 | 3 |
| 1945 | 0 | 37,57 | vaginaal        | 0 | 3 |
| 1946 | 0 | 38,72 | vaginaal        | 0 | 3 |

|      |   |       |             |   |   |
|------|---|-------|-------------|---|---|
| 1947 | 0 | 34    | sec.sectio  | 0 | 3 |
| 1948 | 0 | 37,43 | sec.sectio  | 0 | 3 |
| 1949 | 0 | 38    | prim.sectio | 0 | 3 |
| 1950 | 0 | 40    | sec.sectio  | 0 | 3 |
| 1951 | 0 | 34,28 | vaginaal    | 0 | 3 |
| 1952 | 0 | 34,86 | prim.sectio | 0 | 3 |
| 1953 | 0 | 38,72 | vaginaal    | 0 | 3 |
| 1954 | 0 | 39    | vaginaal    | 0 | 3 |
| 1955 | 0 | 38,43 | vaginaal    | 0 | 3 |
| 1956 | 0 | 40,72 | vaginaal    | 0 | 3 |
| 1957 | 0 | 36    | vaginaal    | 0 | 3 |
| 1958 | 0 | 38,28 | prim.sectio | 0 | 3 |
| 1959 | 0 | 36,86 | vaginaal    | 0 | 3 |
| 1960 | 0 | 38,43 | vaginaal    | 0 | 3 |
| 1961 | 0 | 35    | prim.sectio | 0 | 3 |
| 1962 | 0 | 40,86 | vaginaal    | 0 | 3 |
| 1963 | 0 | 40,28 | vaginaal    | 0 | 3 |
| 1964 | 0 | 40,28 | sec.sectio  | 0 | 3 |
| 1965 | 0 | 36,14 | prim.sectio | 0 | 3 |
| 1966 | 0 | 34,43 | vaginaal    | 0 | 3 |
| 1967 | 0 | 36,43 | vaginaal    | 0 | 3 |
| 1968 | 0 | 34    | sec.sectio  | 0 | 3 |
| 1969 | 0 | 38,72 | vaginaal    | 0 | 3 |
| 1970 | 0 | 39,14 | vaginaal    | 0 | 3 |
| 1971 | 0 | 38,14 | prim.sectio | 0 | 3 |
| 1972 | 0 | 38,43 | vaginaal    | 0 | 3 |
| 1973 | 0 | 36,72 | vaginaal    | 0 | 3 |
| 1974 | 0 | 40,72 | vaginaal    | 0 | 3 |
| 1975 | 0 | 39,28 | vaginaal    | 0 | 3 |
| 1976 | 0 | 40,43 | vaginaal    | 0 | 3 |
| 1977 | 0 | 40    | vaginaal    | 0 | 3 |
| 1978 | 0 | 37,72 | prim.sectio | 0 | 3 |
| 1979 | 0 | 36,86 | prim.sectio | 0 | 3 |

|      |   |       |                   |   |   |
|------|---|-------|-------------------|---|---|
| 1980 | 0 | 38    | vaginaal          | 0 | 3 |
| 1981 | 0 | 37    | vaginaal          | 0 | 3 |
| 1982 | 0 | 37,72 | vaginaal          | 1 | 3 |
| 1983 | 1 | 34,57 | prim.sectio       | 2 | 3 |
| 1984 | 0 | 35,43 | vaginaal          | 0 | 3 |
| 1985 | 0 | 36,43 | vaginaal          | 2 | 3 |
| 1986 | 1 | 34,86 | vaginaal          | 0 | 3 |
| 1987 | 0 | 39,14 | vaginaal          | 0 | 3 |
| 1988 | 0 | 36,57 | vaginaal          | 0 | 3 |
| 1989 | 0 | 36,72 | Vaginale partus   | 0 | 3 |
| 1990 | 0 | 36,72 | Vaginale partus   | 0 | 3 |
| 1991 | 0 | 40    | Vaginale partus   | 0 | 3 |
| 1992 | 0 | 40    | Vaginale partus   | 0 | 3 |
| 1993 | 0 | 41    | Secundaire sectio | 0 | 3 |
| 1994 | 0 | 41    | Secundaire sectio | 0 | 3 |
| 1995 | 0 | 39,72 | Vaginale partus   | 0 | 3 |
| 1996 | 0 | 39,72 | Vaginale partus   | 0 | 3 |
| 1997 | 0 | 40,57 | Vaginale partus   | 0 | 3 |
| 1998 | 0 | 39,28 | Vaginale partus   | 0 | 3 |
| 1999 | 0 | 37,14 | Secundaire sectio | 0 | 3 |
| 2000 | 0 | 37,14 | Secundaire sectio | 0 | 3 |
| 2001 | 0 | 40,72 | Secundaire sectio | 0 | 3 |
| 2002 | 0 | 40,72 | Secundaire sectio | 0 | 3 |
| 2003 | 0 | 37,86 | Vaginale partus   | 2 | 3 |
| 2004 | 0 | 37,86 | Vaginale partus   | 2 | 3 |
| 2005 | 0 | 26,14 | Vaginale partus   | 0 | 4 |
| 2006 | 0 | 37    | Vaginale partus   | 0 | 4 |
| 2007 | 0 | 39    | Vaginale partus   | 0 | 4 |
| 2008 | 0 | 39    | Vaginale partus   | 0 | 4 |
| 2009 | 0 | 38,43 | Primaire sectio   | 0 | 4 |
| 2010 | 0 | 39,14 | Kunstverlossing   | 0 | 4 |
| 2011 | 0 | 37,14 | Vaginale partus   | 0 | 4 |
| 2012 | 0 | 30,57 | Primaire sectio   | 0 | 4 |



|      |   |       |                   |   |   |
|------|---|-------|-------------------|---|---|
| 2013 | 0 | 40,72 | Vaginale partus   | 0 | 4 |
| 2014 | 0 | 38,43 | Vaginale partus   | 0 | 4 |
| 2015 | 0 | 40,86 | Vaginale partus   | 0 | 4 |
| 2016 | 0 | 38,57 | Vaginale partus   | 0 | 4 |
| 2017 | 0 | 40,86 | Vaginale partus   | 0 | 4 |
| 2018 | 0 | 38,86 | Vaginale partus   | 0 | 4 |
| 2019 | 0 | 39,28 | Vaginale partus   | 0 | 4 |
| 2020 | 0 | 35,72 | Secundaire sectio | 0 | 4 |
| 2021 | 0 | 39,43 | Vaginale partus   | 0 | 4 |
| 2022 | 0 | 39,72 | Vaginale partus   | 0 | 4 |
| 2023 | 0 | 37,86 | Vaginale partus   | 0 | 4 |
| 2024 | 0 | 40,43 | Vaginale partus   | 0 | 4 |
| 2025 | 0 | 37,28 | Repeat sectio     | 0 | 4 |
| 2026 | 0 | 38,28 | Vaginale partus   | 0 | 4 |
| 2027 | 0 | 40    | Vaginale partus   | 0 | 4 |
| 2028 | 0 | 37,14 | Vaginale partus   | 0 | 4 |
| 2029 | 0 | 39,43 | Vaginale partus   | 0 | 4 |
| 2030 | 0 | 40,43 | Vaginale partus   | 0 | 4 |
| 2031 | 0 | 40,72 | Vaginale partus   | 0 | 4 |
| 2032 | 0 | 40,72 | Vaginale partus   | 0 | 4 |
| 2033 | 0 | 37,57 | Secundaire sectio | 0 | 4 |
| 2034 | 0 | 37,14 | Vaginale partus   | 0 | 4 |
| 2035 | 0 | 39,72 | Vaginale partus   | 0 | 4 |
| 2036 | 0 | 37,86 | Repeat sectio     | 0 | 4 |
| 2037 | 0 | 37,86 | Repeat sectio     | 0 | 4 |
| 2038 | 0 | 36,43 | Vaginale partus   | 0 | 4 |
| 2039 | 0 | 38,28 | Vaginale partus   | 0 | 4 |
| 2040 | 0 | 40,14 | Secundaire sectio | 0 | 4 |
| 2041 | 0 | 39,14 | Secundaire sectio | 0 | 4 |
| 2042 | 0 | 40,43 | Vaginale partus   | 0 | 4 |
| 2043 | 0 | 39,14 | Vaginale partus   | 0 | 4 |
| 2044 | 0 | 37,28 | Vaginale partus   | 0 | 4 |
| 2045 | 0 | 38,57 | Vaginale partus   | 0 | 4 |

|      |   |       |                   |   |   |
|------|---|-------|-------------------|---|---|
| 2046 | 0 | 38,72 | Vaginale partus   | 0 | 4 |
| 2047 | 0 | 39,28 | Secundaire sectio | 0 | 4 |
| 2048 | 0 | 39,28 | Secundaire sectio | 0 | 4 |
| 2049 | 0 | 38,72 | Vaginale partus   | 0 | 4 |
| 2050 | 0 | 38,57 | Vaginale partus   | 0 | 4 |
| 2051 | 0 | 39,28 | Secundaire sectio | 0 | 4 |
| 2052 | 0 | 40,57 | Secundaire sectio | 0 | 4 |
| 2053 | 0 | 38,28 | Vaginale partus   | 0 | 4 |
| 2054 | 0 | 38,28 | Vaginale partus   | 0 | 4 |
| 2055 | 0 | 36,72 | Vaginale partus   | 2 | 4 |
| 2056 | 0 | 38,72 | Primaire sectio   | 2 | 4 |
| 2057 | 0 | 38,72 | Repeat sectio     | 2 | 4 |
| 2058 | 1 | 39,86 | Vaginale partus   | 2 | 4 |
| 2059 | 0 | 38,72 | Vaginale partus   | 2 | 4 |
| 2060 | 0 | 38,72 | Vaginale partus   | 2 | 4 |
| 2061 | 0 | 38,72 | Vaginale partus   | 2 | 4 |
| 2062 | 0 | 33    | Primaire sectio   | 2 | 4 |
| 2063 | 0 | 38,28 | Vaginale partus   | 2 | 4 |
| 2064 | 0 | 39,43 | Vaginale partus   | 2 | 4 |
| 2065 | 0 | 36,86 | Primaire sectio   | 1 | 4 |
| 2066 | 0 | 38,14 | Repeat sectio     | 0 | 4 |
| 2067 | 0 | 40,57 | Vaginale partus   | 0 | 4 |
| 2068 | 0 | 38,57 | Vaginale partus   | 0 | 4 |
| 2069 | 0 | 37,86 | Secundaire sectio | 1 | 4 |
| 2070 | 1 | 34    | Primaire sectio   | 1 | 4 |
| 2071 | 0 | 37,28 | Vaginale partus   | 0 | 4 |
| 2072 | 0 | 37    | Secundaire sectio | 0 | 4 |
| 2073 | 0 | 37    | Secundaire sectio | 0 | 4 |
| 2074 | 0 | 40,14 | Vaginale partus   | 2 | 4 |
| 2075 | 0 | 39,57 | Vaginale partus   | 2 | 4 |
| 2076 | 0 | 39,14 | Vaginale partus   | 0 | 4 |
| 2077 | 1 | 29,28 | sectio            | 1 | 4 |
| 2078 | 0 | 41,43 | Vaginale partus   | 0 | 4 |

|      |   |       |                   |   |   |
|------|---|-------|-------------------|---|---|
| 2079 | 0 | 38,28 | Vaginale partus   | 2 | 4 |
| 2080 | 0 | 37,28 | Repeat sectio     | 0 | 4 |
| 2081 | 0 | 35,72 | Vaginale partus   | 0 | 4 |
| 2082 | 0 | 36,14 | Vaginale partus   | 2 | 4 |
| 2083 | 0 | 41,14 | Vaginale partus   | 2 | 4 |
| 2084 | 0 | 41,14 | Vaginale partus   | 2 | 4 |
| 2085 | 0 | 41,14 | Vaginale partus   | 2 | 4 |
| 2086 | 0 | 39,14 | Vaginale partus   | 2 | 4 |
| 2087 | 1 | 38,14 | Vaginale partus   | 1 | 4 |
| 2088 | 1 | 38,14 | Vaginale partus   | 1 | 4 |
| 2089 | 1 | 38,14 | Vaginale partus   | 1 | 4 |
| 2090 | 0 | 39,86 | Vaginale partus   | 2 | 4 |
| 2091 | 0 | 39,86 | Vaginale partus   | 2 | 4 |
| 2092 | 0 | 40    | vaginaal          | 0 | 4 |
| 2093 | 0 | 38,57 | Vaginale partus   | 0 | 4 |
| 2094 | 0 | 38,57 | Vaginale partus   | 0 | 4 |
| 2095 | 0 | 38,57 | Vaginale partus   | 0 | 4 |
| 2096 | 0 | 41,28 | Secundaire sectio | 0 | 4 |
| 2097 | 0 | 41,28 | Secundaire sectio | 0 | 4 |
| 2098 | 0 | 40,72 | Vaginale partus   | 0 | 4 |
| 2099 | 0 | 40,72 | Vaginale partus   | 0 | 4 |
| 2100 | 0 | 39,57 | Repeat sectio     | 0 | 4 |
| 2101 | 0 | 39,57 | Repeat sectio     | 0 | 4 |
| 2102 | 0 | 39,57 | Repeat sectio     | 0 | 4 |
| 2103 | 0 | 40,72 | vaginaal          | 0 | 4 |
| 2104 | 0 | 38,72 | vaginaal          | 2 | 4 |
| 2105 | 0 | 38,57 | vaginaal          | 2 | 4 |
| 2106 | 0 | 37,72 | Secundaire sectio | 2 | 4 |
| 2107 | 0 | 37,72 | Secundaire sectio | 2 | 4 |
| 2108 | 0 | 37,72 | Secundaire sectio | 2 | 4 |
| 2109 | 0 | 38,72 | vaginaal          | 2 | 4 |
| 2110 | 0 | 39,57 | vaginaal          | 2 | 4 |
| 2111 | 0 | 39,14 | Vaginale partus   | 0 | 4 |

|      |   |       |                   |   |   |
|------|---|-------|-------------------|---|---|
| 2112 | 0 | 39,14 | Vaginale partus   | 0 | 4 |
| 2113 | 0 | 39    | Secundaire sectio | 2 | 4 |
| 2114 | 0 | 39    | Secundaire sectio | 2 | 4 |
| 2115 | 0 | 39    | Secundaire sectio | 2 | 4 |
| 2116 | 0 | 40    | sec.sectio        | 0 | 4 |
| 2117 | 0 | 36,86 | Vaginale partus   | 0 | 4 |
| 2118 | 0 | 36,86 | Vaginale partus   | 0 | 4 |
| 2119 | 0 | 38,43 | Vaginale partus   | 1 | 4 |
| 2120 | 0 | 38,43 | Vaginale partus   | 1 | 4 |
| 2121 | 0 | 38,72 | Vaginale partus   | 2 | 4 |
| 2122 | 0 | 38,72 | Vaginale partus   | 2 | 4 |
| 2123 | 0 | 38,86 | Vaginale partus   | 1 | 4 |
| 2124 | 0 | 38,86 | Vaginale partus   | 1 | 4 |
| 2125 | 0 | 38,86 | Vaginale partus   | 1 | 4 |
| 2126 | 0 | 39,14 | Secundaire sectio | 0 | 4 |
| 2127 | 0 | 39,14 | Secundaire sectio | 0 | 4 |
| 2128 | 0 | 40,28 | vaginaal          | 2 | 4 |
| 2129 | 0 | 40,86 | Secundaire sectio | 0 | 4 |
| 2130 | 0 | 40,86 | Secundaire sectio | 0 | 4 |
| 2131 | 0 | 40,72 | Vaginale partus   | 1 | 4 |
| 2132 | 0 | 40,72 | Vaginale partus   | 1 | 4 |
| 2133 | 0 | 40,72 | Vaginale partus   | 2 | 4 |
| 2134 | 0 | 40,72 | Vaginale partus   | 2 | 4 |
| 2135 | 0 | 40,72 | Vaginale partus   | 2 | 4 |
| 2136 | 0 | 41,72 | sec.sectio        | 0 | 4 |
| 2137 | 0 | 41,14 | Secundaire sectio | 0 | 4 |
| 2138 | 0 | 41,14 | Secundaire sectio | 0 | 4 |
| 2139 | 0 | 39,43 | Primaire sectio   | 0 | 4 |
| 2140 | 0 | 39,43 | Primaire sectio   | 0 | 4 |
| 2141 | 0 | 36,28 | Vaginale partus   | 2 | 4 |
| 2142 | 0 | 36,28 | Vaginale partus   | 2 | 4 |
| 2143 | 0 | 36,43 | vaginaal          | 1 | 4 |
| 2144 | 0 | 33,86 | Secundaire sectio | 2 | 4 |

|      |   |       |                   |   |   |
|------|---|-------|-------------------|---|---|
| 2145 | 0 | 33,86 | Secundaire sectio | 2 | 4 |
| 2146 | 0 | 40,72 | vaginaal          | 0 | 4 |
| 2147 | 0 | 40    | sec.sectio        | 0 | 4 |
| 2148 | 1 | 29,28 | prim.sectio       | 0 | 4 |
| 2149 | 0 | 26,28 | prim.sectio       | 0 | 4 |
| 2150 | 0 | 31,14 | prim.sectio       | 0 | 4 |
| 2151 | 0 | 37,72 | sec.sectio        | 0 | 4 |
| 2152 | 0 | 40,86 | vaginaal          | 0 | 4 |
| 2153 | 0 | 40    | vaginaal          | 0 | 4 |
| 2154 | 0 | 40,14 | vaginaal          | 0 | 4 |
| 2155 | 0 | 39,43 | vaginaal          | 0 | 4 |
| 2156 | 0 | 40,14 | vaginaal          | 0 | 4 |
| 2157 | 0 | 39,86 | vaginaal          | 0 | 4 |
| 2158 | 0 | 30,86 | prim.sectio       | 0 | 4 |
| 2159 | 0 | 33,57 | vaginaal          | 0 | 4 |
| 2160 | 0 | 36,43 | vaginaal          | 0 | 4 |
| 2161 | 0 | 33,43 | vaginaal          | 0 | 4 |
| 2162 | 0 | 41,72 | sec.sectio        | 0 | 4 |
| 2163 | 0 | 39    | vaginaal          | 0 | 4 |
| 2164 | 0 | 37,72 | vaginaal          | 0 | 4 |
| 2165 | 0 | 39,28 | vaginaal          | 0 | 4 |
| 2166 | 0 | 39,57 | vaginaal          | 0 | 4 |
| 2167 | 0 | 39,14 | vaginaal          | 0 | 4 |
| 2168 | 0 | 38,72 | vaginaal          | 0 | 4 |
| 2169 | 0 | 40,43 | vaginaal          | 0 | 4 |
| 2170 | 0 | 40    | vaginaal          | 0 | 4 |
| 2171 | 0 | 39,86 | sec.sectio        | 0 | 4 |
| 2172 | 0 | 39,72 | vaginaal          | 0 | 4 |
| 2173 | 0 | 38    | sec.sectio        | 0 | 4 |
| 2174 | 0 | 39,86 | vaginaal          | 0 | 4 |
| 2175 | 0 | 39,28 | vaginaal          | 0 | 4 |
| 2176 | 0 | 39,57 | vaginaal          | 0 | 4 |
| 2177 | 0 | 38,72 | vaginaal          | 0 | 4 |

|      |   |       |                   |   |   |
|------|---|-------|-------------------|---|---|
| 2178 | 0 | 39,14 | vaginaal          | 0 | 4 |
| 2179 | 0 | 39,43 | vaginaal          | 1 | 4 |
| 2180 | 0 | 35    | prim.sectio       | 2 | 4 |
| 2181 | 0 | 40,57 | Vaginale partus   | 0 | 4 |
| 2182 | 0 | 40,57 | Vaginale partus   | 0 | 4 |
| 2183 | 0 | 40,43 | Vaginale partus   | 0 | 4 |
| 2184 | 0 | 40,43 | Vaginale partus   | 0 | 4 |
| 2185 | 0 | 40,14 | Vaginale partus   | 0 | 4 |
| 2186 | 0 | 40,14 | Vaginale partus   | 0 | 4 |
| 2187 | 0 | 40    | Vaginale partus   | 2 | 4 |
| 2188 | 0 | 40    | Vaginale partus   | 2 | 4 |
| 2189 | 0 | 41    | Vaginale partus   | 2 | 4 |
| 2190 | 0 | 41    | Vaginale partus   | 2 | 4 |
| 2191 | 0 | 39,57 | Vaginale partus   | 2 | 4 |
| 2192 | 0 | 39,57 | Vaginale partus   | 2 | 4 |
| 2193 | 0 | 38,28 | Secundaire sectio | 0 | 5 |
| 2194 | 0 | 38,28 | Secundaire sectio | 0 | 5 |
| 2195 | 0 | 33,86 | Vaginale partus   | 0 | 5 |
| 2196 | 0 | 40,72 | Kunstverlossing   | 0 | 5 |
| 2197 | 0 | 37    | Vaginale partus   | 2 | 5 |
| 2198 | 0 | 37    | Vaginale partus   | 2 | 5 |
| 2199 | 0 | 36    | Secundaire sectio | 2 | 5 |
| 2200 | 0 | 36    | Secundaire sectio | 2 | 5 |
| 2201 | 0 | 38,57 | Primaire sectio   | 2 | 5 |
| 2202 | 0 | 35,86 | Primaire sectio   | 2 | 5 |
| 2203 | 0 | 35,86 | Primaire sectio   | 2 | 5 |
| 2204 | 0 | 35,86 | Primaire sectio   | 2 | 5 |
| 2205 | 0 | 32    | Primaire sectio   | 0 | 5 |
| 2206 | 0 | 38,28 | Secundaire sectio | 0 | 5 |
| 2207 | 0 | 37,43 | Primaire sectio   | 2 | 5 |
| 2208 | 0 | 41,28 | Vaginale partus   | 2 | 5 |
| 2209 | 0 | 41,28 | Vaginale partus   | 2 | 5 |
| 2210 | 0 | 40    | sec.sectio        | 0 | 5 |

|      |   |       |                   |   |   |
|------|---|-------|-------------------|---|---|
| 2211 | 0 | 19,72 | Vaginale partus   | 2 | 5 |
| 2212 | 0 | 34,72 | Vaginale partus   | 2 | 5 |
| 2213 | 0 | 34,72 | Vaginale partus   | 2 | 5 |
| 2214 | 0 | 34,72 | Vaginale partus   | 2 | 5 |
| 2215 | 0 | 39,28 | Vaginale partus   | 2 | 5 |
| 2216 | 0 | 39,28 | Vaginale partus   | 2 | 5 |
| 2217 | 0 | 38,28 | Vaginale partus   | 2 | 5 |
| 2218 | 0 | 38,28 | Vaginale partus   | 2 | 5 |
| 2219 | 0 | 38,28 | Vaginale partus   | 2 | 5 |
| 2220 | 0 | 38,14 | Vaginale partus   | 2 | 5 |
| 2221 | 0 | 38,14 | Vaginale partus   | 2 | 5 |
| 2222 | 0 | 40    | prim.sectio       | 0 | 5 |
| 2223 | 0 | 40,28 | Vaginale partus   | 2 | 5 |
| 2224 | 0 | 40,28 | Vaginale partus   | 2 | 5 |
| 2225 | 0 | 40,28 | Vaginale partus   | 2 | 5 |
| 2226 | 0 | 37,28 | Vaginale partus   | 2 | 5 |
| 2227 | 0 | 37,28 | Vaginale partus   | 2 | 5 |
| 2228 | 0 | 37,28 | Vaginale partus   | 2 | 5 |
| 2229 | 0 | 27,57 | Secundaire sectio | 2 | 5 |
| 2230 | 0 | 27,57 | Secundaire sectio | 2 | 5 |
| 2231 | 0 | 39,86 | Vaginale partus   | 2 | 5 |
| 2232 | 0 | 39,86 | Vaginale partus   | 2 | 5 |
| 2233 | 0 | 39,72 | vaginaal          | 2 | 5 |
| 2234 | 0 | 39,57 | Primaire sectio   | 2 | 5 |
| 2235 | 0 | 39,57 | Primaire sectio   | 2 | 5 |
| 2236 | 0 | 40,72 | Vaginale partus   | 0 | 5 |
| 2237 | 0 | 40,72 | Vaginale partus   | 0 | 5 |
| 2238 | 0 | 40,43 | Vaginale partus   | 2 | 5 |
| 2239 | 0 | 40,43 | Vaginale partus   | 2 | 5 |
| 2240 | 0 | 40,43 | Vaginale partus   | 2 | 5 |
| 2241 | 0 | 39    | Vaginale partus   | 2 | 5 |
| 2242 | 0 | 39    | Vaginale partus   | 2 | 5 |
| 2243 | 0 | 39,86 | vaginaal          | 2 | 5 |

|      |   |       |                   |   |   |
|------|---|-------|-------------------|---|---|
| 2244 | 0 | 38,86 | Vaginale partus   | 1 | 5 |
| 2245 | 0 | 38,86 | Vaginale partus   | 1 | 5 |
| 2246 | 0 | 38,86 | Repeat sectio     | 2 | 5 |
| 2247 | 0 | 38,86 | Repeat sectio     | 2 | 5 |
| 2248 | 0 | 38,86 | Repeat sectio     | 2 | 5 |
| 2249 | 0 | 38,14 | vaginaal          | 2 | 5 |
| 2250 | 0 | 40,86 | vaginaal          | 2 | 5 |
| 2251 | 0 | 37,28 | Vaginale partus   | 2 | 5 |
| 2252 | 0 | 37,72 | vaginaal          | 2 | 5 |
| 2253 | 0 | 40,72 | vaginaal          | 2 | 5 |
| 2254 | 0 | 36,86 | Vaginale partus   | 0 | 5 |
| 2255 | 0 | 36,86 | Vaginale partus   | 0 | 5 |
| 2256 | 0 | 36,86 | Vaginale partus   | 0 | 5 |
| 2257 | 0 | 38,14 | sec.sectio        | 2 | 5 |
| 2258 | 0 | 37,72 | vaginaal          | 0 | 5 |
| 2259 | 0 | 36,86 | prim.sectio       | 0 | 5 |
| 2260 | 0 | 38    | vaginaal          | 0 | 5 |
| 2261 | 0 | 38,14 | Secundaire sectio | 2 | 5 |
| 2262 | 0 | 38,14 | Secundaire sectio | 2 | 5 |
| 2263 | 0 | 39,43 | Vaginale partus   | 2 | 5 |
| 2264 | 0 | 39,43 | Vaginale partus   | 2 | 5 |
| 2265 | 0 | 36,72 | Vaginale partus   | 0 | 7 |
| 2266 | 0 | 37,28 |                   | 0 | 7 |
| 2267 | 0 | 39    | Vaginale partus   | 0 | 7 |
| 2268 | 0 | 41,43 | vaginaal          | 0 | 7 |
| 2269 | 0 | 37,72 | Vaginale partus   | 0 | 7 |
| 2270 | 0 | 37,14 | Primaire sectio   | 0 | 7 |
| 2271 | 0 | 36,72 | Primaire sectio   | 1 | 7 |
| 2272 | 0 | 34,28 | Primaire sectio   | 0 | 7 |
| 2273 | 0 | 37,57 | Vaginale partus   | 0 | 7 |
| 2274 | 0 | 35    | Repeat sectio     | 1 | 7 |
| 2275 | 0 | 38,28 | Vaginale partus   | 0 | 7 |
| 2276 | 0 | 38,28 | Vaginale partus   | 0 | 7 |



|      |   |       |                   |   |   |
|------|---|-------|-------------------|---|---|
| 2277 | 0 | 39,57 | Vaginale partus   | 0 | 7 |
| 2278 | 0 | 39,57 | Vaginale partus   | 0 | 7 |
| 2279 | 0 | 39,72 | Vaginale partus   | 0 | 7 |
| 2280 | 0 | 39,72 | Vaginale partus   | 0 | 7 |
| 2281 | 0 | 39,14 | vaginaal          | 0 | 7 |
| 2282 | 0 | 41    | vaginaal          | 0 | 7 |
| 2283 | 0 | 41,14 | Secundaire sectio | 0 | 7 |
| 2284 | 0 | 41,14 | Secundaire sectio | 0 | 7 |
| 2285 | 0 | 40,14 | Vaginale partus   | 0 | 7 |
| 2286 | 0 | 40,14 | Vaginale partus   | 0 | 7 |
| 2287 | 1 | 38,72 | Vaginale partus   | 0 | 7 |
| 2288 | 1 | 38,72 | Vaginale partus   | 0 | 7 |
| 2289 | 0 | 36,57 | sec.sectio        | 0 | 7 |
| 2290 | 0 | 40    | Vaginale partus   | 0 | 7 |
| 2291 | 0 | 40    | Vaginale partus   | 0 | 7 |
| 2292 | 0 | 40,72 | Vaginale partus   | 0 | 7 |
| 2293 | 0 | 40,72 | Vaginale partus   | 0 | 7 |
| 2294 | 0 | 38,28 | Vaginale partus   | 0 | 7 |
| 2295 | 0 | 38,28 | Vaginale partus   | 0 | 7 |
| 2296 | 0 | 41,14 | Vaginale partus   | 0 | 7 |
| 2297 | 0 | 41,14 | Vaginale partus   | 0 | 7 |
| 2298 | 0 | 40,72 | Secundaire sectio | 1 | 7 |
| 2299 | 0 | 40,72 | Secundaire sectio | 1 | 7 |
| 2300 | 1 | 40,28 | Vaginale partus   | 0 | 7 |
| 2301 | 1 | 40,28 | Vaginale partus   | 0 | 7 |
| 2302 | 0 | 39,14 | Vaginale partus   | 0 | 7 |
| 2303 | 0 | 39,14 | Vaginale partus   | 0 | 7 |
| 2304 | 0 | 40,14 | Vaginale partus   | 0 | 7 |
| 2305 | 0 | 40,14 | Vaginale partus   | 0 | 7 |
| 2306 | 0 | 38,43 | Primaire sectio   | 1 | 7 |
| 2307 | 0 | 38,43 | Primaire sectio   | 1 | 7 |
| 2308 | 0 | 41,43 | vaginaal          | 0 | 7 |
| 2309 | 0 | 35    | Vaginale partus   | 2 | 7 |

|      |   |       |                   |   |   |
|------|---|-------|-------------------|---|---|
| 2310 | 0 | 35    | Vaginale partus   | 2 | 7 |
| 2311 | 0 | 39    | Vaginale partus   | 0 | 7 |
| 2312 | 0 | 39    | Vaginale partus   | 0 | 7 |
| 2313 | 0 | 39,43 | Vaginale partus   | 0 | 7 |
| 2314 | 0 | 39,43 | Vaginale partus   | 0 | 7 |
| 2315 | 0 | 40,14 | Vaginale partus   | 0 | 7 |
| 2316 | 0 | 40,14 | Vaginale partus   | 0 | 7 |
| 2317 | 0 | 40,14 | Vaginale partus   | 0 | 7 |
| 2318 | 0 | 40    | vaginaal          | 0 | 7 |
| 2319 | 0 | 39    | Vaginale partus   | 0 | 7 |
| 2320 | 0 | 39    | Vaginale partus   | 0 | 7 |
| 2321 | 0 | 35,86 | Vaginale partus   | 0 | 7 |
| 2322 | 0 | 41,14 | Vaginale partus   | 0 | 7 |
| 2323 | 0 | 41,14 | Vaginale partus   | 0 | 7 |
| 2324 | 0 | 35,86 | Vaginale partus   | 0 | 7 |
| 2325 | 0 | 39    | Vaginale partus   | 0 | 7 |
| 2326 | 0 | 40,14 | Secundaire sectio | 0 | 7 |
| 2327 | 0 | 40,43 | Vaginale partus   | 0 | 7 |
| 2328 | 0 | 39    | Primaire sectio   | 0 | 7 |
| 2329 | 0 | 38,14 | Primaire sectio   | 0 | 7 |
| 2330 | 0 | 37,43 | Vaginale partus   | 0 | 7 |
| 2331 | 0 | 40,43 | Vaginale partus   | 1 | 7 |
| 2332 | 0 | 38,72 | Secundaire sectio | 0 | 7 |
| 2333 | 0 | 38,72 | Secundaire sectio | 0 | 7 |
| 2334 | 0 | 37,14 | Secundaire sectio | 0 | 7 |
| 2335 | 0 | 37,86 | Vaginale partus   | 0 | 7 |
| 2336 | 0 | 37,86 | Vaginale partus   | 0 | 7 |
| 2337 | 0 | 38,43 | Vaginale partus   | 0 | 7 |
| 2338 | 0 | 38,57 | Vaginale partus   | 0 | 7 |
| 2339 | 0 | 38,57 | Vaginale partus   | 0 | 7 |
| 2340 | 0 | 37,14 | Vaginale partus   | 0 | 7 |
| 2341 | 0 | 37,14 | Vaginale partus   | 0 | 7 |
| 2342 | 0 | 41,43 | vaginaal          | 0 | 7 |

|      |   |       |                   |   |   |
|------|---|-------|-------------------|---|---|
| 2343 | 0 | 37,43 | vaginaal          | 0 | 7 |
| 2344 | 0 | 38,57 | Primaire sectio   | 0 | 7 |
| 2345 | 0 | 39,72 | Vaginale partus   | 0 | 7 |
| 2346 | 0 | 38,57 | Primaire sectio   | 0 | 7 |
| 2347 | 0 | 39,57 | Vaginale partus   | 0 | 7 |
| 2348 | 0 | 39,72 | Vaginale partus   | 0 | 7 |
| 2349 | 0 | 39,57 | Vaginale partus   | 0 | 7 |
| 2350 | 0 | 39,57 | Vaginale partus   | 0 | 7 |
| 2351 | 0 | 39,57 | Vaginale partus   | 0 | 7 |
| 2352 | 0 | 37,57 | Primaire sectio   | 0 | 7 |
| 2353 | 0 | 37,57 | Primaire sectio   | 0 | 7 |
| 2354 | 0 | 37,57 | Primaire sectio   | 0 | 7 |
| 2355 | 0 | 38,86 | vaginaal          | 0 | 7 |
| 2356 | 0 | 37,28 | Vaginale partus   | 0 | 7 |
| 2357 | 0 | 37,28 | Vaginale partus   | 0 | 7 |
| 2358 | 0 | 37,28 | Vaginale partus   | 0 | 7 |
| 2359 | 0 | 39,14 | Repeat sectio     | 0 | 7 |
| 2360 | 1 | 38,72 | Vaginale partus   | 1 | 7 |
| 2361 | 1 | 38,72 | Vaginale partus   | 1 | 7 |
| 2362 | 0 | 40    | Vaginale partus   | 1 | 7 |
| 2363 | 0 | 40    | Vaginale partus   | 1 | 7 |
| 2364 | 0 | 39,28 | Repeat sectio     | 1 | 7 |
| 2365 | 0 | 39,28 | Repeat sectio     | 1 | 7 |
| 2366 | 0 | 40    | Vaginale partus   | 0 | 7 |
| 2367 | 0 | 40    | Vaginale partus   | 0 | 7 |
| 2368 | 0 | 40    | Vaginale partus   | 0 | 7 |
| 2369 | 1 | 39,57 | Vaginale partus   | 0 | 7 |
| 2370 | 0 | 32,28 | prim.sectio       | 0 | 7 |
| 2371 | 0 | 40,57 | Vaginale partus   | 0 | 7 |
| 2372 | 0 | 38,72 | Secundaire sectio | 0 | 7 |
| 2373 | 0 | 38,72 | Secundaire sectio | 0 | 7 |
| 2374 | 0 | 40,57 | Vaginale partus   | 0 | 7 |
| 2375 | 0 | 38,14 | Vaginale partus   | 1 | 7 |

|      |   |       |                   |   |   |
|------|---|-------|-------------------|---|---|
| 2376 | 0 | 38,14 | Vaginale partus   | 1 | 7 |
| 2377 | 0 | 36,86 | Vaginale partus   | 0 | 7 |
| 2378 | 0 | 35,28 | Kunstverlossing   | 0 | 7 |
| 2379 | 0 | 27,72 | Primaire sectio   | 0 | 7 |
| 2380 | 0 | 38,43 | Vaginale partus   | 0 | 7 |
| 2381 | 0 | 37,14 | Vaginale partus   | 0 | 7 |
| 2382 | 0 | 35,72 | Vaginale partus   | 0 | 7 |
| 2383 | 0 | 38    | Vaginale partus   | 0 | 7 |
| 2384 | 0 | 38    | Repeat sectio     | 0 | 7 |
| 2385 | 0 | 33    | Primaire sectio   | 0 | 7 |
| 2386 | 0 | 41,14 | Repeat sectio     | 0 | 7 |
| 2387 | 0 | 38,28 | Primaire sectio   | 0 | 7 |
| 2388 | 0 | 39    | Vaginale partus   | 0 | 7 |
| 2389 | 0 | 32,72 | Primaire sectio   | 0 | 7 |
| 2390 | 0 | 39,57 | Vaginale partus   | 0 | 7 |
| 2391 | 0 | 33    | Vaginale partus   | 0 | 7 |
| 2392 | 0 | 36,72 | Primaire sectio   | 0 | 7 |
| 2393 | 0 | 35,28 | Vaginale partus   | 0 | 7 |
| 2394 | 0 | 39,86 | Vaginale partus   | 0 | 7 |
| 2395 | 0 | 41,14 | Repeat sectio     | 0 | 7 |
| 2396 | 0 | 37,57 | Primaire sectio   | 0 | 7 |
| 2397 | 1 | 40,28 | Repeat sectio     | 2 | 7 |
| 2398 | 0 | 24,57 | Secundaire sectio | 0 | 7 |
| 2399 | 0 | 39,28 | Vaginale partus   | 0 | 7 |
| 2400 | 0 | 26,43 | Primaire sectio   | 0 | 7 |
| 2401 | 0 | 40,28 | Vaginale partus   | 0 | 7 |
| 2402 | 0 | 40,28 | Vaginale partus   | 0 | 7 |
| 2403 | 0 | 37    | Vaginale partus   | 0 | 7 |
| 2404 | 0 | 38,28 | Vaginale partus   | 0 | 7 |
| 2405 | 0 | 38,28 | Vaginale partus   | 0 | 7 |
| 2406 | 0 | 39,43 | vaginaal          | 0 | 7 |
| 2407 | 0 | 41    | Vaginale partus   | 0 | 7 |
| 2408 | 0 | 41    | Vaginale partus   | 0 | 7 |

|      |   |       |                   |   |   |
|------|---|-------|-------------------|---|---|
| 2409 | 0 | 40,57 | Vaginale partus   | 1 | 7 |
| 2410 | 0 | 40,57 | Vaginale partus   | 1 | 7 |
| 2411 | 0 | 37,43 | Secundaire sectio | 0 | 7 |
| 2412 | 0 | 37,43 | Secundaire sectio | 0 | 7 |
| 2413 | 0 | 37,43 | Secundaire sectio | 0 | 7 |
| 2414 | 0 | 37,28 | Vaginale partus   | 1 | 7 |
| 2415 | 0 | 37,28 | Vaginale partus   | 1 | 7 |
| 2416 | 0 | 37,43 | vaginaal          | 0 | 7 |
| 2417 | 0 | 40    | vaginaal          | 0 | 7 |
| 2418 | 0 | 40    | Vaginale partus   | 0 | 7 |
| 2419 | 0 | 40,43 | vaginaal          | 0 | 7 |
| 2420 | 0 | 39,86 | Vaginale partus   | 0 | 7 |
| 2421 | 0 | 39,86 | Vaginale partus   | 0 | 7 |
| 2422 | 0 | 39,43 | Vaginale partus   | 0 | 7 |
| 2423 | 0 | 39,43 | Vaginale partus   | 0 | 7 |
| 2424 | 0 | 38,86 | Vaginale partus   | 0 | 7 |
| 2425 | 0 | 38,86 | Vaginale partus   | 0 | 7 |
| 2426 | 0 | 39,43 | vaginaal          | 1 | 7 |
| 2427 | 1 | 39,28 | Vaginale partus   | 0 | 7 |
| 2428 | 1 | 39,28 | Vaginale partus   | 0 | 7 |
| 2429 | 0 | 39,14 | Vaginale partus   | 0 | 7 |
| 2430 | 0 | 39,14 | Vaginale partus   | 0 | 7 |
| 2431 | 1 | 39,28 | Vaginale partus   | 0 | 7 |
| 2432 | 0 | 39,43 | Vaginale partus   | 0 | 7 |
| 2433 | 0 | 39,43 | Vaginale partus   | 0 | 7 |
| 2434 | 0 | 39,72 | vaginaal          | 0 | 7 |
| 2435 | 0 | 41,14 | Repeat sectio     | 0 | 7 |
| 2436 | 0 | 41,14 | Repeat sectio     | 0 | 7 |
| 2437 | 1 | 37,43 | Vaginale partus   | 0 | 7 |
| 2438 | 1 | 37,43 | Vaginale partus   | 0 | 7 |
| 2439 | 0 | 38,43 | Vaginale partus   | 0 | 7 |
| 2440 | 0 | 38,43 | Vaginale partus   | 0 | 7 |
| 2441 | 0 | 41    | Vaginale partus   | 0 | 7 |

|      |   |       |                   |   |   |
|------|---|-------|-------------------|---|---|
| 2442 | 0 | 41    | Vaginale partus   | 0 | 7 |
| 2443 | 0 | 39,43 | Vaginale partus   | 1 | 7 |
| 2444 | 0 | 39,43 | Vaginale partus   | 1 | 7 |
| 2445 | 0 | 32,14 | vaginaal          | 2 | 7 |
| 2446 | 0 | 40,28 | Vaginale partus   | 0 | 7 |
| 2447 | 0 | 40,28 | Vaginale partus   | 0 | 7 |
| 2448 | 0 | 41    | Secundaire sectio | 0 | 7 |
| 2449 | 0 | 41    | Secundaire sectio | 0 | 7 |
| 2450 | 0 | 40,86 | Primaire sectio   | 0 | 7 |
| 2451 | 0 | 40,86 | Primaire sectio   | 0 | 7 |
| 2452 | 0 | 39,28 | Vaginale partus   | 0 | 7 |
| 2453 | 0 | 39,28 | Vaginale partus   | 0 | 7 |
| 2454 | 1 | 37    | vaginaal          | 0 | 7 |
| 2455 | 0 | 29,57 | prim.sectio       | 0 | 7 |
| 2456 | 0 | 34,72 | vaginaal          | 0 | 7 |
| 2457 | 0 | 37,14 | Primaire sectio   | 0 | 7 |
| 2458 | 0 | 18,43 |                   | 0 | 7 |
| 2459 | 0 | 37,86 | Secundaire sectio | 0 | 7 |
| 2460 | 0 | 37,86 | Vaginale partus   | 0 | 7 |
| 2461 | 0 | 28,28 | Primaire sectio   | 0 | 7 |
| 2462 | 0 | 28,28 | Primaire sectio   | 0 | 7 |

| ID Code | PPROM <37w | PPROM <34w | Conception | Smoking | Gender | birth weight | BW percentile | SBP-st | DBP-st | MAP-st | HR-st | SV-st | SI-sts | CO-st |
|---------|------------|------------|------------|---------|--------|--------------|---------------|--------|--------|--------|-------|-------|--------|-------|
| 1       | 0          | 0          |            |         | 0      | 2965         | 10            | 111    | 79     | 87     | 100   | 66    | 37     | 6,6   |
| 2       | 0          | 0          |            |         | 1      | 2980         | 10            | 147    | 101    | 113    | 105   | 86    | 42     | 9     |
| 3       | 0          | 0          |            |         | 0      | 2060         | 10            | 127    | 89     | 101    | 113   | 48    | 31     | 5,5   |
| 4       | 0          | 0          |            |         | 1      | 2960         | 10            | 133    | 78     | 91     | 103   | 52    | 34     | 5,3   |
| 5       | 0          | 0          |            |         | 0      | 1780         | 10            | 99     | 71     | 79     | 90    | 84    | 47     | 7,5   |
| 6       | 0          | 0          |            |         | 0      | 2600         | 10            | 117    | 82     | 91     | 113   | 77    | 43     | 8,7   |
| 7       | 0          | 0          |            |         | 1      | 1437         | 10            | 119    | 82     | 91     | 82    | 96    | 48     | 7,9   |
| 8       | 0          | 0          |            |         | 0      | 3020         | 10            | 105    | 73     | 82     | 81    | 66    | 44     | 5,3   |
| 9       | 0          | 0          |            |         | 0      | 2380         | 10            | 131    | 71     | 86     | 92    | 107   | 56     | 9,9   |
| 10      | 0          | 0          |            |         | 0      | 3110         | 10            | 140    | 75     | 86     | 74    | 99    | 58     | 7,3   |
| 11      | 0          | 0          |            |         | 1      | 1160         | 10            | 124    | 94     | 103    | 114   | 52    | 32     | 5,9   |
| 12      | 0          | 0          |            |         | 1      | 2855         | 10            | 110    | 78     | 87     | 105   | 53    | 34     | 5,5   |
| 13      | 0          | 0          |            |         | 0      | 2705         | 10            |        |        |        |       |       |        |       |
| 14      | 0          | 0          |            |         | 0      | 1845         | 10            | 136    | 90     | 101    | 92    | 77    | 47     | 7,1   |
| 15      | 0          | 0          | 1          |         | 0      | 2460         | 10            | 113    | 69     | 80     | 79    | 101   | 58     | 8     |
| 16      | 0          | 0          | 1          |         | 0      | 2460         | 10            | 116    | 64     | 76     | 85    | 97    | 58     | 8,2   |
| 17      | 0          | 0          | 0          | 1       | 0      | 1775         | 10            | 113    | 76     | 84     | 75    | 79    | 45     | 5,9   |
| 18      | 0          | 0          | 0          | 1       | 0      | 2805         | 10            | 114    | 63     | 75     | 97    | 101   | 49     | 9,8   |
| 19      | 0          | 0          | 0          | 1       | 0      | 2805         | 10            | 125    | 70     | 80     | 94    | 98    | 46     | 9,2   |
| 20      | 0          | 0          | 0          | 1       | 1      | 2395         | 10            | 101    | 70     | 77     | 121   | 56    | 39     | 6,7   |
| 21      | 0          | 0          | 0          | 1       | 1      | 2395         | 10            | 108    | 72     | 82     | 114   | 44    | 32     | 5     |
| 22      | 0          | 0          | 0          | 2       | 0      | 3120         | 10            | 117    | 73     | 85     | 69    | 92    |        | 6,3   |
| 23      | 0          | 0          | 0          | 0       | 1      | 2685         | 10            | 116    | 74     | 85     | 93    | 74    | 42     | 6,8   |
| 24      | 0          | 0          | 0          | 0       | 1      | 2845         | 10            | 111    | 81     | 89     | 96    | 82    | 47     | 7,9   |
| 25      | 0          | 0          | 0          | 0       | 1      | 2845         | 10            | 119    | 69     | 80     | 84    | 86    | 49     | 7,2   |
| 26      | 0          | 0          | 0          | 0       | 1      | 2940         | 10            | 94     | 72     | 76     | 98    | 81    | 46     | 7,9   |
| 27      | 0          | 0          | 0          | 0       | 1      | 2940         | 10            | 97     | 63     | 72     | 106   | 67    | 38     | 7,2   |
| 28      | 0          | 0          | 0          | 0       | 0      | 2845         | 10            | 108    | 70     | 80     | 100   | 67    | 40     | 6,7   |
| 29      | 0          | 0          | 0          | 0       | 0      | 2845         | 10            | 97     | 80     | 84     | 98    | 69    | 40     | 6,8   |
| 30      | 0          | 0          | 1          | 0       | 1      | 2970         | 10            | 134    | 80     | 92     | 89    | 91    | 44     | 8,1   |
| 31      | 0          | 0          | 1          | 0       | 1      | 2970         | 10            | 121    | 78     | 89     | 84    | 103   | 51     | 8,6   |
| 32      | 0          | 1          | 1          | 0       | 0      | 620          | 10            |        |        |        |       |       |        |       |

|    |   |   |   |   |   |      |      |     |    |     |     |     |    |      |
|----|---|---|---|---|---|------|------|-----|----|-----|-----|-----|----|------|
| 33 | 0 | 1 | 1 | 0 | 0 | 620  | 10   | 144 | 94 | 106 | 151 | 55  | 32 | 8,4  |
| 34 | 0 | 0 |   | 0 | 0 | 1760 | 10   | 122 | 89 | 98  | 94  | 59  |    | 5,6  |
| 35 | 0 | 0 |   | 0 | 1 | 2460 | 10   | 139 | 99 | 109 | 89  | 78  |    | 6,8  |
| 36 | 0 | 0 |   | 0 | 0 | 1816 | 10   | 134 | 83 | 97  | 80  | 102 |    | 8,2  |
| 37 | 0 | 0 |   | 1 | 0 | 2450 | 10   | 102 | 68 | 77  | 89  | 82  |    | 7,3  |
| 38 | 0 | 0 |   |   | 0 | 2875 | 10   | 122 | 87 | 96  | 108 | 77  | 41 | 8,4  |
| 39 | 0 | 0 |   |   | 0 | 2875 | 10   | 140 | 87 | 98  | 101 | 85  | 47 | 8,6  |
| 40 | 0 | 0 |   |   | 0 | 3080 | 12,5 | 126 | 86 | 95  | 109 | 77  | 39 | 8,4  |
| 41 | 0 | 0 |   |   | 1 | 2785 | 12,5 | 125 | 76 | 85  | 122 | 48  | 29 | 5,7  |
| 42 | 0 | 0 |   |   | 0 | 2760 | 12,5 | 106 | 75 | 80  | 107 | 54  | 32 | 5,7  |
| 43 | 0 | 0 |   |   | 0 | 1150 | 12,5 | 136 | 93 | 104 | 69  | 112 | 57 | 7,8  |
| 44 | 0 | 0 |   |   | 0 | 2290 | 12,5 | 104 | 67 | 75  | 89  | 71  | 45 | 6,3  |
| 45 | 0 | 0 |   |   | 1 | 2570 | 15   | 106 | 67 | 77  | 103 | 79  | 45 | 8,1  |
| 46 | 0 | 0 |   |   | 0 | 3250 | 15   | 115 | 74 | 83  | 77  | 100 | 53 | 7,7  |
| 47 | 0 | 0 |   |   | 0 | 3095 | 15   | 143 | 82 | 95  | 118 | 78  | 43 | 9,2  |
| 48 | 0 | 0 |   |   | 1 | 2940 | 15   | 108 | 67 | 75  | 80  | 115 | 63 | 9,3  |
| 49 | 0 | 0 |   |   | 1 | 2570 | 15   | 113 | 70 | 82  | 92  | 77  | 45 | 7,1  |
| 50 | 0 | 0 | 0 |   | 1 | 2925 | 15   | 85  | 68 | 75  | 106 | 48  |    | 5,1  |
| 51 | 0 | 0 |   |   | 0 | 2940 | 15   | 125 | 87 | 96  | 67  | 77  | 46 | 5,1  |
| 52 | 0 | 0 |   |   | 1 | 2620 | 17,5 | 119 | 66 | 76  | 104 | 63  | 34 | 6,5  |
| 53 | 0 | 0 |   |   | 0 | 1250 | 17,5 | 124 | 85 | 96  | 82  | 85  | 45 | 7    |
| 54 | 0 | 0 |   |   | 1 | 1420 | 17,5 | 126 | 82 | 92  | 93  | 50  | 36 | 4,7  |
| 55 | 0 | 0 |   |   | 0 | 2610 | 17,5 | 116 | 84 | 93  | 85  | 67  | 41 | 5,7  |
| 56 | 0 | 0 |   |   | 1 | 2770 | 20   | 125 | 81 | 92  | 69  | 93  | 45 | 7,1  |
| 57 | 0 | 0 |   |   | 1 | 2770 | 20   | 113 | 71 | 82  | 119 | 98  | 49 | 11,7 |
| 58 | 0 | 0 |   |   | 1 | 3000 | 20   | 108 | 74 | 82  | 111 | 46  | 29 | 5,1  |
| 59 | 0 | 0 |   |   | 1 | 3015 | 20   | 118 | 81 | 90  | 89  | 85  | 46 | 7,6  |
| 60 | 0 | 0 |   |   | 1 | 1860 | 20   | 139 | 92 | 103 | 104 | 61  | 32 | 6,3  |
| 61 | 0 | 0 |   |   | 1 | 3015 | 20   | 125 | 80 | 90  | 82  | 98  | 54 | 8    |
| 62 | 0 | 0 |   |   | 1 | 2770 | 20   | 123 | 82 | 90  | 122 | 88  | 43 | 10,8 |
| 63 | 0 | 0 |   |   | 0 | 3200 | 20   | 111 | 75 | 85  | 95  | 90  |    | 8,5  |
| 64 | 0 | 0 |   |   | 1 | 3030 | 20   | 116 | 76 | 87  | 91  | 72  | 41 | 6,6  |
| 65 | 0 | 0 |   |   | 0 | 2565 | 22,5 | 146 | 99 | 110 | 123 | 100 | 48 | 12,4 |



|    |   |   |   |   |      |      |     |     |     |     |     |    |      |
|----|---|---|---|---|------|------|-----|-----|-----|-----|-----|----|------|
| 66 | 0 | 0 |   | 1 | 2670 | 22,5 | 123 | 76  | 86  | 96  | 66  | 39 | 6,4  |
| 67 | 0 | 0 |   | 1 | 3170 | 22,5 | 122 | 83  | 94  | 106 | 67  | 41 | 7,1  |
| 68 | 0 | 0 |   | 0 | 3010 | 22,5 | 110 | 73  | 81  | 86  | 84  | 48 | 7,2  |
| 69 | 0 | 0 |   | 0 | 3010 | 22,5 | 117 | 81  | 89  | 82  | 91  | 50 | 7,4  |
| 70 | 0 | 0 |   | 1 | 2895 | 25   | 118 | 81  | 90  | 110 | 85  | 43 | 9,3  |
| 71 | 0 | 0 |   | 0 | 2930 | 25   | 108 | 71  | 80  | 86  | 76  | 42 | 6,6  |
| 72 | 0 | 0 |   | 1 | 2610 | 25   | 110 | 65  | 73  | 90  | 60  | 36 | 5,4  |
| 73 | 0 | 0 |   | 0 | 3075 | 27,5 | 118 | 71  | 81  | 96  | 81  | 48 | 7,8  |
| 74 | 0 | 0 |   | 1 | 3235 | 27,5 | 147 | 81  | 98  | 99  | 92  | 42 | 9,1  |
| 75 | 0 | 0 |   | 0 | 2415 | 30   | 112 | 71  | 80  | 97  | 46  | 29 | 4,5  |
| 76 | 0 | 0 |   | 1 | 1367 | 30   | 184 | 125 | 140 | 88  | 84  | 40 | 7,4  |
| 77 | 0 | 0 |   | 1 | 3290 | 35   | 120 | 69  | 79  | 99  | 73  | 42 | 7,2  |
| 78 | 0 | 0 |   | 0 | 3595 | 37,5 | 108 | 61  | 72  | 103 | 125 | 61 | 12,8 |
| 79 | 0 | 0 |   | 0 | 2500 | 40   | 105 | 70  | 79  | 91  | 88  | 50 | 8,1  |
| 80 | 0 | 0 |   | 1 | 3360 | 40   | 122 | 76  | 86  | 97  | 75  | 42 | 7,4  |
| 81 | 0 | 0 |   | 1 | 1820 | 40   | 106 | 66  | 77  | 73  | 85  | 54 | 6,3  |
| 82 | 0 | 0 |   | 1 | 3360 | 40   | 105 | 74  | 82  | 103 | 72  | 40 | 7,5  |
| 83 | 0 | 0 |   | 0 | 3545 | 42,5 | 137 | 94  | 104 | 99  | 81  | 39 | 8    |
| 84 | 0 | 0 | 0 | 0 | 2940 | 45   | 121 | 73  | 84  | 108 | 70  | 34 | 7,6  |
| 85 | 0 | 0 | 0 | 0 | 2940 | 45   | 110 | 74  | 84  | 96  | 85  | 41 | 8,1  |
| 86 | 0 | 0 |   | 1 | 3450 | 45,5 | 142 | 97  | 109 | 113 | 75  | 40 | 8,5  |
| 87 | 0 | 0 |   | 1 | 1475 | 47,5 | 111 | 76  | 85  | 113 | 75  | 43 | 8,5  |
| 88 | 0 | 0 |   | 0 | 2590 | 50   | 108 | 76  | 86  | 99  | 82  | 46 | 8,2  |
| 89 | 0 | 0 |   | 0 | 3305 | 50   | 114 | 68  | 76  | 85  | 97  | 53 | 8,3  |
| 90 | 0 | 0 |   | 0 | 3305 | 50   | 115 | 66  | 78  | 86  | 90  | 51 | 7,8  |
| 91 | 0 | 0 |   | 1 | 3350 | 52,5 | 128 | 81  | 93  | 99  | 89  | 52 | 8,8  |
| 92 | 0 | 0 |   | 1 | 3350 | 52,5 | 123 | 90  | 100 | 109 | 67  | 40 | 7,3  |
| 93 | 0 | 0 |   | 0 | 3670 | 55   | 126 | 86  | 96  | 91  | 82  | 44 | 7,5  |
| 94 | 0 | 0 |   | 0 | 3230 | 55   | 118 | 76  | 86  | 105 | 80  | 41 | 8,4  |
| 95 | 0 | 0 |   | 0 | 3255 | 57,5 | 130 | 78  | 92  | 91  | 80  | 47 | 7,3  |
| 96 | 0 | 0 |   | 0 | 3695 | 57,5 | 112 | 70  | 80  | 120 | 51  | 29 | 6,2  |
| 97 | 0 | 0 |   | 1 | 2945 | 57,5 |     |     |     |     |     |    |      |
| 98 | 0 | 0 |   | 1 | 3430 | 60   | 119 | 65  | 80  | 93  | 80  | 44 | 7,4  |

|     |   |   |   |   |      |      |     |    |     |     |     |    |      |
|-----|---|---|---|---|------|------|-----|----|-----|-----|-----|----|------|
| 99  | 0 | 0 |   | 1 | 3490 | 60   | 99  | 65 | 75  | 75  | 102 | 59 | 7,6  |
| 100 | 0 | 0 |   | 1 | 3545 | 60   | 115 | 71 | 80  | 87  | 102 | 50 | 8,9  |
| 101 | 0 | 0 |   | 1 | 3460 | 62,5 | 134 | 83 | 90  | 125 | 68  | 38 | 8,6  |
| 102 | 0 | 0 |   | 0 | 3620 | 62,5 | 99  | 75 | 84  | 90  | 120 | 63 | 10,8 |
| 103 | 0 | 0 |   | 0 | 3465 | 62,5 | 141 | 95 | 108 | 103 | 78  | 41 | 8,1  |
| 104 | 0 | 0 |   | 0 | 3465 | 62,5 | 138 | 94 | 104 | 108 | 56  | 34 | 6,1  |
| 105 | 0 | 0 |   | 0 | 3620 | 62,5 | 110 | 73 | 82  | 84  | 53  | 36 | 4,5  |
| 106 | 0 | 0 |   | 0 | 3885 | 62,5 | 82  | 61 | 66  | 90  | 51  | 35 | 4,6  |
| 107 | 0 | 0 |   | 0 | 3620 | 62,5 | 103 | 67 | 75  | 95  | 51  | 34 | 4,9  |
| 108 | 0 | 0 |   | 0 | 3490 | 65   | 143 | 98 | 109 | 104 | 58  | 34 | 6,1  |
| 109 | 0 | 0 |   | 0 | 3445 | 65   | 124 | 83 | 94  | 103 | 98  | 49 | 10,1 |
| 110 | 0 | 0 |   | 0 | 3445 | 65   | 124 | 82 | 93  | 98  | 92  | 44 | 9    |
| 111 | 0 | 0 |   | 1 | 3650 | 67,5 | 101 | 68 | 78  | 101 | 81  | 49 | 8,2  |
| 112 | 0 | 0 |   | 1 | 3650 | 67,5 | 110 | 70 | 79  | 97  | 67  | 42 | 6,5  |
| 113 | 0 | 0 |   | 0 | 3520 | 67,5 | 120 | 74 | 84  | 100 | 89  | 49 | 8,9  |
| 114 | 0 | 0 |   | 1 | 3630 | 67,5 | 115 | 73 | 84  | 88  | 83  | 47 | 7,3  |
| 115 | 0 | 0 |   | 0 | 3710 | 70   | 121 | 74 | 86  | 88  | 81  | 47 | 7,1  |
| 116 | 0 | 0 |   | 0 | 3705 | 70   | 131 | 77 | 89  | 105 | 64  | 35 | 6,8  |
| 117 | 0 | 0 |   | 1 | 3275 | 70   | 126 | 72 | 85  | 83  | 76  | 43 | 6,4  |
| 118 | 0 | 0 |   | 1 | 3200 | 72,5 | 123 | 88 | 98  | 122 | 76  | 39 | 9,3  |
| 119 | 0 | 0 |   | 1 | 3420 | 72,5 | 126 | 74 | 85  | 120 | 62  | 31 | 7,5  |
| 120 | 0 | 0 |   | 1 | 3725 | 75   | 116 | 75 | 85  | 84  | 128 | 65 | 10,7 |
| 121 | 0 | 0 |   | 0 | 3586 | 75   | 138 | 91 | 102 | 135 | 60  | 33 | 8,2  |
| 122 | 0 | 0 |   | 0 | 3260 | 75   | 124 | 75 | 86  | 117 | 75  | 35 | 8,8  |
| 123 | 0 | 0 |   | 1 | 3615 | 75   | 121 | 82 | 91  | 93  | 93  | 48 | 8,7  |
| 124 | 0 | 0 |   | 1 | 3725 | 75   | 128 | 75 | 86  | 85  | 113 | 59 | 9,6  |
| 125 | 0 | 0 | 0 | 1 | 3830 | 75   | 115 | 68 | 79  | 96  | 104 |    | 10   |
| 126 | 0 | 0 |   | 0 | 3260 | 75   | 123 | 75 | 87  | 113 | 82  | 37 | 9,2  |
| 127 | 0 | 0 |   | 1 | 3615 | 75   | 132 | 84 | 93  | 105 | 79  | 43 | 8,4  |
| 128 | 0 | 0 |   | 1 | 3615 | 75   | 130 | 76 | 87  | 88  | 93  | 49 | 8,2  |
| 129 | 0 | 0 |   | 1 | 3640 | 77,5 | 122 | 88 | 98  | 72  | 108 | 51 | 7,8  |
| 130 | 0 | 0 |   | 1 | 2610 | 77,5 | 119 | 72 | 83  | 87  | 77  | 40 | 6,7  |
| 131 | 0 | 0 |   | 1 | 3670 | 77,5 | 111 | 84 | 92  | 101 | 70  |    | 7,1  |

|     |   |   |   |   |      |      |     |     |     |     |     |    |      |
|-----|---|---|---|---|------|------|-----|-----|-----|-----|-----|----|------|
| 132 | 0 | 0 |   | 1 | 2610 | 77,5 | 121 | 75  | 87  | 87  | 93  | 49 | 8,1  |
| 133 | 0 | 0 |   | 0 | 3665 | 80   | 134 | 88  | 97  | 92  | 86  | 45 | 7,9  |
| 134 | 0 | 0 |   | 0 | 3150 | 80   | 152 | 117 | 126 | 87  | 83  | 44 | 7,2  |
| 135 | 0 | 0 |   | 1 | 3710 | 80   | 128 | 69  | 83  | 105 | 74  | 45 | 7,7  |
| 136 | 0 | 0 |   | 1 | 3510 | 80   | 118 | 84  | 93  | 99  | 77  | 38 | 7,6  |
| 137 | 0 | 0 |   | 1 | 3215 | 80   | 108 | 74  | 81  | 92  | 101 | 48 | 9,3  |
| 138 | 0 | 0 |   | 0 | 3995 | 80   | 99  | 68  | 77  | 90  | 104 | 57 | 9,4  |
| 139 | 0 | 0 |   | 1 | 3545 | 82,5 | 151 | 94  | 110 | 107 | 97  | 48 | 10,4 |
| 140 | 0 | 0 |   | 0 | 3750 | 85   | 122 | 86  | 95  | 104 | 72  | 38 | 7,6  |
| 141 | 0 | 0 |   | 0 | 3910 | 85   | 162 | 102 | 116 | 94  | 77  | 42 | 7,3  |
| 142 | 0 | 0 |   | 0 | 4085 | 85   | 109 | 67  | 77  | 93  | 85  | 47 | 7,9  |
| 143 | 0 | 0 |   | 1 | 4040 | 87,5 | 131 | 81  | 92  | 110 | 116 | 57 | 12,8 |
| 144 | 0 | 0 |   | 1 | 3825 | 87,5 | 105 | 72  | 81  | 98  | 77  | 43 | 7,6  |
| 145 | 0 | 0 |   | 1 | 3825 | 87,5 | 122 | 68  | 84  | 97  | 96  | 53 | 9,3  |
| 146 | 0 | 0 | 0 | 1 | 3490 | 87,5 | 110 | 72  | 81  | 91  | 76  |    | 6,9  |
| 147 | 0 | 0 |   | 0 | 3850 | 90   | 122 | 81  | 90  | 109 | 91  | 48 | 9,9  |
| 148 | 0 | 0 |   | 1 | 3690 | 90   | 160 | 104 | 119 | 108 | 109 | 52 | 11,8 |
| 149 | 0 | 0 |   | 1 | 3975 | 92,5 | 124 | 88  | 98  | 88  | 129 | 56 | 11,3 |
| 150 | 0 | 0 |   | 1 | 3620 | 92,5 | 135 | 84  | 98  | 92  | 80  | 45 | 7,4  |
| 151 | 0 | 0 |   | 1 | 4060 | 92,5 | 167 | 118 | 127 | 78  | 131 | 62 | 10,3 |
| 152 | 0 | 0 |   | 1 | 4135 | 97,5 |     |     |     | 102 | 82  | 41 | 8,4  |
| 153 | 0 | 0 |   | 0 | 4375 | 97,5 | 111 | 70  | 81  | 112 | 70  | 41 | 7,8  |
| 154 | 0 | 0 |   | 1 | 4135 | 97,5 | 128 | 81  | 94  | 100 | 84  | 42 | 8,3  |
| 155 | 0 | 0 |   | 1 | 4305 | 97,5 | 119 | 73  | 83  | 113 | 55  | 34 | 6,2  |
| 156 | 0 | 0 |   | 0 | 4775 | 97,5 | 120 | 66  | 77  | 97  | 107 | 54 | 10,4 |
| 157 | 0 | 0 | 0 | 0 | 3485 | 37,5 | 126 | 86  | 96  | 102 | 70  |    | 7,1  |
| 158 | 0 | 0 | 1 | 0 | 3045 | 20   | 109 | 75  | 83  | 84  | 85  | 54 | 7,1  |
| 159 | 0 | 0 | 1 | 0 | 3045 | 20   | 99  | 73  | 82  | 92  | 70  | 45 | 6,4  |
| 160 | 0 | 0 | 0 | 0 | 3890 | 62,5 | 115 | 70  | 82  | 91  | 88  | 52 | 7,9  |
| 161 | 0 | 0 | 0 | 0 | 3890 | 62,5 | 118 | 69  | 81  | 97  | 84  | 49 | 8,1  |
| 162 | 0 | 0 | 1 | 0 | 3385 | 70   | 111 | 69  | 77  | 115 | 63  | 32 | 7,2  |
| 163 | 0 | 0 | 1 | 0 | 3385 | 70   | 118 | 70  | 79  | 95  | 79  | 42 | 7,5  |
| 164 | 0 | 0 | 0 | 0 | 3025 | 20   | 105 | 67  | 77  | 96  | 114 | 56 | 10,9 |

|     |   |   |   |   |      |      |     |    |     |     |     |    |      |
|-----|---|---|---|---|------|------|-----|----|-----|-----|-----|----|------|
| 165 | 0 | 0 | 0 | 0 | 3025 | 20   | 131 | 74 | 89  | 111 | 83  | 42 | 9,2  |
| 166 | 0 | 0 |   | 0 | 3285 | 47,5 | 118 | 82 | 91  | 93  | 71  | 36 | 6,6  |
| 167 | 0 | 0 |   | 0 | 3285 | 47,5 | 98  | 68 | 77  | 69  | 96  | 50 | 6,7  |
| 168 | 0 | 0 | 0 | 0 | 2835 | 25   | 100 | 73 | 81  | 84  | 74  |    | 6,3  |
| 169 | 0 | 0 |   | 1 | 1765 | 15   | 124 | 81 | 90  | 126 | 68  | 35 | 8,6  |
| 170 | 0 | 0 |   | 0 | 3910 | 75   | 119 | 73 | 85  | 96  | 78  | 50 | 7,5  |
| 171 | 0 | 0 |   | 0 | 3910 | 75   | 114 | 73 | 84  | 104 | 52  | 34 | 5,4  |
| 172 | 0 | 0 |   | 1 | 3525 | 55   | 133 | 83 | 95  | 99  | 83  | 43 | 8,2  |
| 173 | 0 | 0 |   | 0 | 4270 | 97,5 | 98  | 70 | 78  | 96  | 92  | 48 | 8,9  |
| 174 | 0 | 0 |   | 0 | 3090 | 15   | 128 | 77 | 87  | 100 | 82  | 49 | 8,2  |
| 175 | 0 | 0 |   | 1 | 3685 | 72,5 | 103 | 66 | 76  | 75  | 97  |    | 7,3  |
| 176 | 0 | 0 |   | 1 | 3285 | 90   |     |    |     |     |     |    |      |
| 177 | 0 | 0 |   | 1 | 2820 | 80   | 99  | 69 | 78  | 103 | 65  | 41 | 6,8  |
| 178 | 0 | 0 |   | 1 | 3280 | 45   | 101 | 74 | 82  | 114 | 71  | 40 | 8    |
| 179 | 0 | 0 |   | 1 | 3280 | 45   | 130 | 79 | 92  | 93  | 89  | 48 | 8,2  |
| 180 | 0 | 0 |   | 1 | 3280 | 45   | 128 | 81 | 91  | 91  | 88  | 49 | 8    |
| 181 | 0 | 0 |   | 0 | 4255 | 92,5 | 133 | 83 | 91  | 115 | 67  | 36 | 7,8  |
| 182 | 0 | 0 |   | 0 | 3305 | 32,5 | 123 | 82 | 94  | 96  | 73  | 43 | 6,9  |
| 183 | 0 | 0 |   | 0 | 2355 | 20   | 107 | 68 | 77  | 105 | 65  | 40 | 6,9  |
| 184 | 0 | 0 |   | 1 | 3375 | 42,5 | 124 | 78 | 88  | 136 | 49  | 29 | 6,6  |
| 185 | 0 | 0 |   | 0 | 3170 | 20   | 138 | 89 | 98  | 110 | 68  | 40 | 7,5  |
| 186 | 0 | 0 |   | 1 | 4280 | 97,5 | 108 | 63 | 72  | 90  | 96  | 48 | 8,8  |
| 187 | 0 | 0 |   | 1 | 3010 | 32,5 | 141 | 81 | 96  | 91  | 93  | 45 | 8,5  |
| 188 | 0 | 0 |   | 1 | 3875 | 90   | 158 | 95 | 102 | 112 | 75  | 37 | 8,4  |
| 189 | 0 | 0 |   | 0 | 3430 | 32,5 | 118 | 75 | 85  | 101 | 103 | 55 | 10,4 |
| 190 | 0 | 0 |   | 0 | 2320 | 20   | 131 | 83 | 93  | 102 | 82  | 41 | 8,5  |
| 191 | 0 | 0 |   | 0 | 2320 | 20   | 151 | 98 | 110 | 89  | 74  | 36 | 6,6  |
| 192 | 0 | 0 |   | 1 | 3250 | 30   | 130 | 94 | 103 | 79  | 72  | 38 | 5,7  |
| 193 | 0 | 0 | 1 |   |      |      | 118 | 75 | 86  | 93  | 61  |    | 5,7  |
| 194 | 0 | 0 | 0 | 1 | 3205 | 25   | 109 | 75 | 85  | 101 | 69  |    | 7    |
| 195 | 0 | 0 |   | 1 | 3525 | 57,5 | 131 | 84 | 93  | 109 | 73  | 39 | 8    |
| 196 | 0 | 0 | 0 | 1 | 3050 | 22,5 | 109 | 74 | 84  | 92  | 59  | 39 | 5,4  |
| 197 | 0 | 0 | 0 | 1 | 3050 | 22,5 | 109 | 71 | 80  | 101 | 71  | 46 | 7,1  |

|     |   |   |   |   |      |      |     |     |     |     |     |    |      |  |
|-----|---|---|---|---|------|------|-----|-----|-----|-----|-----|----|------|--|
| 198 | 0 | 0 |   | 1 | 3075 | 22,5 |     |     |     |     |     |    |      |  |
| 199 | 0 | 0 |   | 0 | 2780 | 20   | 120 | 74  | 85  | 105 | 107 | 56 | 11,3 |  |
| 200 | 0 | 0 |   | 0 | 1170 | 55   | 122 | 69  | 81  | 103 | 83  | 46 | 8,7  |  |
| 201 | 0 | 0 | 0 | 0 | 3675 | 67,5 | 121 | 85  | 94  | 79  | 104 | 55 | 8,1  |  |
| 202 | 0 | 0 | 0 | 0 | 3675 | 67,5 | 117 | 68  | 80  | 73  | 93  | 51 | 6,8  |  |
| 203 | 0 | 0 | 0 | 0 | 3675 | 67,5 | 117 | 81  | 88  | 66  | 102 | 57 | 6,7  |  |
| 204 | 0 | 0 |   | 0 | 3605 | 100  | 153 | 88  | 104 | 99  | 74  | 35 | 7,4  |  |
| 205 | 0 | 0 |   | 0 | 3605 | 100  | 156 | 84  | 103 | 101 | 91  | 42 | 9,2  |  |
| 206 | 0 | 0 |   | 1 | 3495 | 55   |     |     |     |     |     |    |      |  |
| 207 | 0 | 0 |   | 1 | 3495 | 55   | 103 | 68  | 79  | 102 | 99  | 48 | 10,1 |  |
| 208 | 0 | 0 |   | 0 | 3975 | 77,5 | 109 | 75  | 85  | 91  | 99  | 48 | 8,9  |  |
| 209 | 0 | 0 |   | 0 | 3940 | 92,5 | 118 | 81  | 91  | 102 | 94  | 48 | 9,4  |  |
| 210 | 0 | 0 |   | 1 | 3980 | 92,5 | 132 | 90  | 102 | 91  | 75  | 40 | 6,8  |  |
| 211 | 0 | 0 | 2 | 0 | 3325 | 22,5 | 124 | 79  | 90  | 81  | 130 | 58 | 10,6 |  |
| 212 | 0 | 0 |   | 1 | 3295 | 32,5 | 107 | 73  | 83  | 84  | 92  | 47 | 7,8  |  |
| 213 | 0 | 0 |   | 0 | 3440 | 62,5 | 105 | 70  | 79  | 104 | 54  | 31 | 5,6  |  |
| 214 | 0 | 0 |   | 0 | 3440 | 62,5 | 122 | 82  | 93  | 96  | 76  | 44 | 7,3  |  |
| 215 | 0 | 0 |   | 0 | 3420 | 72,5 | 115 | 73  | 83  | 80  | 125 | 61 | 10   |  |
| 216 | 0 | 0 |   | 0 | 3420 | 72,5 | 122 | 76  | 88  | 81  | 153 | 74 | 12,3 |  |
| 217 | 0 | 0 |   | 0 | 3820 | 67,5 | 109 | 78  | 86  | 87  | 80  | 42 | 6,9  |  |
| 218 | 0 | 0 |   | 1 | 3815 | 87,5 | 126 | 85  | 95  | 102 | 87  | 47 | 8,8  |  |
| 219 | 0 | 0 |   | 1 | 3815 | 87,5 | 110 | 75  | 84  | 88  | 87  | 52 | 7,6  |  |
| 220 | 0 | 0 |   | 1 | 3815 | 87,5 | 117 | 76  | 86  | 93  | 75  | 44 | 7    |  |
| 221 | 0 | 0 |   | 1 | 2895 | 25   | 107 | 69  | 78  | 82  | 82  | 48 | 6,8  |  |
| 222 | 0 | 0 |   | 1 | 3635 | 97,5 | 138 | 99  | 110 | 97  | 81  | 37 | 7,8  |  |
| 223 | 0 | 0 |   | 0 | 3100 | 50   | 124 | 83  | 92  | 103 | 97  | 55 | 9,9  |  |
| 224 | 0 | 0 |   | 0 | 2450 | 30   | 125 | 84  | 95  | 89  | 85  | 44 | 7,6  |  |
| 225 | 0 | 0 |   | 0 | 3485 | 65   | 148 | 99  | 111 | 79  | 106 | 56 | 8,4  |  |
| 226 | 0 | 0 |   | 0 | 2520 | 20   | 107 | 74  | 83  | 104 | 62  | 35 | 6,5  |  |
| 227 | 0 | 0 |   | 1 | 2620 | 67,5 | 124 | 88  | 98  | 86  | 90  | 46 | 7,7  |  |
| 228 | 0 | 0 |   | 0 | 3785 | 87,5 | 152 | 100 | 112 | 86  | 70  | 33 | 6    |  |
| 229 | 0 | 0 |   | 1 | 2970 | 30   | 157 | 98  | 111 | 118 | 81  | 37 | 9,6  |  |
| 230 | 0 | 0 |   | 1 | 2970 | 30   | 141 | 86  | 98  | 104 | 96  | 46 | 10   |  |

|     |   |   |   |   |      |      |     |     |     |     |     |    |      |
|-----|---|---|---|---|------|------|-----|-----|-----|-----|-----|----|------|
| 231 | 0 | 0 | 0 | 0 | 2700 | 37,5 | 143 | 83  | 95  | 105 | 145 | 60 | 15,2 |
| 232 | 0 | 0 | 0 | 0 | 2700 | 37,5 | 132 | 69  | 82  | 83  | 152 | 69 | 12,6 |
| 233 | 0 | 0 | 0 | 0 | 2700 | 37,5 | 123 | 84  | 93  | 128 | 92  | 41 | 11,9 |
| 234 | 0 | 0 | 0 | 1 | 2780 | 32,5 | 125 | 90  | 101 | 103 | 61  |    | 6,2  |
| 235 | 0 | 0 |   | 1 | 1658 | 42,5 | 148 | 103 | 115 | 104 | 82  | 38 | 8,5  |
| 236 | 0 | 0 |   | 1 | 4270 | 97,5 | 135 | 78  | 93  | 94  | 134 | 63 | 12,6 |
| 237 | 0 | 0 | 0 | 0 | 3718 | 82,5 | 141 | 88  | 100 | 101 | 107 | 43 | 10,8 |
| 238 | 0 | 0 | 0 | 0 | 3718 | 82,5 | 138 | 89  | 97  | 99  | 95  | 38 | 9,4  |
| 239 | 0 | 0 | 0 | 0 | 3885 | 95   | 81  | 67  | 71  | 92  | 85  |    | 7,8  |
| 240 | 0 | 0 |   | 0 | 3440 | 45   | 116 | 70  | 79  | 83  | 107 | 55 | 9    |
| 241 | 0 | 0 |   | 0 | 3275 | 87,5 | 115 | 52  | 69  | 108 | 68  | 41 | 7,4  |
| 242 | 0 | 0 |   | 0 | 3775 | 87,5 | 144 | 90  | 102 | 95  | 88  | 40 | 8,4  |
| 243 | 0 | 0 |   | 0 | 3775 | 87,5 | 135 | 82  | 97  | 101 | 72  | 33 | 7,2  |
| 244 | 0 | 0 |   | 0 | 4255 | 87,5 | 135 | 77  | 90  | 88  | 109 | 51 | 9,6  |
| 245 | 0 | 0 |   | 0 | 4550 | 100  | 140 | 91  | 103 | 122 | 62  | 31 | 7,6  |
| 246 | 0 | 0 |   | 0 | 4550 | 100  | 155 | 97  | 110 | 108 | 72  | 34 | 7,8  |
| 247 | 0 | 0 |   | 0 | 3545 | 92,5 | 160 | 97  | 112 | 121 | 92  | 46 | 11,1 |
| 248 | 0 | 0 |   | 0 | 3545 | 92,5 | 146 | 82  | 97  | 119 | 85  | 44 | 10,2 |
| 249 | 0 | 0 |   | 1 | 3135 | 47,5 | 127 | 86  | 96  | 126 | 94  | 48 | 11,9 |
| 250 | 0 | 0 |   | 0 | 4285 | 100  | 179 | 114 | 131 | 119 | 53  | 26 | 6,3  |
| 251 | 0 | 0 | 0 | 1 | 3940 | 97,5 | 123 | 64  | 75  | 98  | 77  | 46 | 7,5  |
| 252 | 0 | 0 | 0 | 1 | 3940 | 97,5 | 123 | 68  | 79  | 107 | 61  | 36 | 6,5  |
| 253 | 0 | 0 | 0 | 1 | 3910 | 95   | 105 | 71  | 83  | 96  | 84  | 47 | 8,1  |
| 254 | 0 | 0 | 0 | 1 | 3910 | 95   | 112 | 79  | 87  | 97  | 74  | 43 | 7,2  |
| 255 | 0 | 0 | 0 | 1 | 3140 | 30   | 106 | 68  | 78  | 104 | 78  | 46 | 8,1  |
| 256 | 0 | 0 | 0 | 1 | 3140 | 30   | 111 | 67  | 76  | 98  | 68  | 41 | 6,7  |
| 257 | 0 | 0 | 0 | 1 | 3315 | 47,5 | 110 | 71  | 81  | 86  | 85  | 49 | 7,3  |
| 258 | 0 | 0 | 0 | 1 | 2765 | 37,5 | 121 | 65  | 77  | 83  | 97  | 49 | 8,1  |
| 259 | 0 | 0 | 0 | 1 | 2765 | 37,5 | 99  | 62  | 70  | 81  | 120 | 59 | 9,8  |
| 260 | 1 | 0 |   | 0 | 2800 | 42,5 | 130 | 76  | 86  | 83  | 76  | 46 | 6,4  |
| 261 | 1 | 0 |   | 0 | 2800 | 42,5 | 118 | 79  | 88  | 76  | 81  | 49 | 6,2  |
| 262 | 1 | 0 |   | 0 | 3175 | 82,5 | 103 | 67  | 76  | 85  | 93  | 55 | 7,9  |
| 263 | 0 | 1 | 0 | 1 | 2035 | 77,5 | 118 | 81  | 91  | 85  | 95  | 50 | 8,1  |

|     |   |   |   |   |   |      |      |     |    |    |     |     |    |      |
|-----|---|---|---|---|---|------|------|-----|----|----|-----|-----|----|------|
| 264 | 0 | 1 | 0 |   | 1 | 2035 | 77,5 | 121 | 83 | 94 | 79  | 86  | 45 | 6,7  |
| 265 | 0 | 0 | 0 | 3 | 1 | 3630 | 65   | 119 | 80 | 90 | 110 | 72  | 36 | 7,9  |
| 266 | 0 | 0 | 0 | 3 | 0 | 3025 | 20   | 105 | 74 | 83 | 108 | 60  | 36 | 6,5  |
| 267 | 0 | 0 | 0 | 3 | 0 | 3025 | 20   | 119 | 79 | 89 | 98  | 61  | 36 | 5,9  |
| 268 | 0 | 0 | 0 | 3 | 1 | 3770 | 77,5 | 117 | 71 | 82 | 94  | 80  | 44 | 7,5  |
| 269 | 0 | 0 | 0 | 3 | 1 | 3770 | 77,5 | 107 | 77 | 86 | 96  | 82  | 45 | 7,9  |
| 270 | 0 | 0 | 0 | 3 | 0 | 2785 | 52,5 | 102 | 65 | 74 | 92  | 65  | 39 | 6    |
| 271 | 0 | 0 | 0 | 3 | 0 | 2785 | 52,5 | 132 | 72 | 85 | 89  | 66  | 41 | 5,9  |
| 272 | 0 | 0 | 0 | 3 | 0 | 3430 | 57,5 | 119 | 76 | 86 | 91  | 77  | 41 | 7,1  |
| 273 | 0 | 0 | 0 | 3 | 0 | 3430 | 57,5 | 124 | 79 | 88 | 80  | 88  | 49 | 7,1  |
| 274 | 0 | 0 | 0 | 1 | 1 | 2490 | 15   | 114 | 70 | 81 | 83  | 88  | 56 | 7,3  |
| 275 | 0 | 0 | 0 | 1 | 1 | 2490 | 15   | 124 | 81 | 93 | 90  | 71  | 46 | 6,4  |
| 276 | 0 | 0 | 0 | 1 | 1 | 3165 | 20   | 129 | 74 | 87 | 90  | 67  | 38 | 6,1  |
| 277 | 0 | 0 | 0 | 1 | 1 | 3165 | 20   | 133 | 74 | 88 | 99  | 72  | 41 | 7,2  |
| 278 | 0 | 0 | 0 | 1 | 0 | 3270 | 27,5 | 128 | 73 | 83 | 95  | 106 | 55 | 10,1 |
| 279 | 0 | 0 | 0 | 1 | 0 | 3270 | 27,5 | 124 | 79 | 93 | 106 | 83  | 45 | 8,8  |
| 280 | 0 | 0 | 0 | 1 | 1 | 3105 | 27,5 | 105 | 65 | 76 | 85  | 104 | 56 | 8,9  |
| 281 | 0 | 0 | 0 | 1 | 1 | 3105 | 27,5 | 107 | 62 | 72 | 83  | 133 | 69 | 11,4 |
| 282 | 0 | 0 | 0 | 1 | 1 | 3460 | 37,5 | 126 | 83 | 93 | 101 | 62  | 29 | 6,3  |
| 283 | 0 | 0 | 0 | 1 | 1 | 3460 | 37,5 | 133 | 84 | 99 | 90  | 80  | 39 | 7,2  |
| 284 | 0 | 0 | 0 | 1 | 0 | 3320 | 50   | 113 | 69 | 80 | 100 | 82  | 43 | 8,2  |
| 285 | 0 | 0 | 0 | 1 | 0 | 3320 | 50   | 116 | 73 | 83 | 98  | 90  | 49 | 8,9  |
| 286 | 0 | 0 | 0 | 1 | 0 | 3875 | 72,5 | 114 | 63 | 73 | 97  | 75  | 40 | 7,2  |
| 287 | 0 | 0 | 0 | 1 | 0 | 3875 | 72,5 | 110 | 68 | 79 | 92  | 87  | 46 | 8    |
| 288 | 0 | 0 | 0 | 1 | 1 | 3730 | 82,5 | 76  | 45 | 54 | 95  | 68  | 39 | 6,5  |
| 289 | 0 | 0 | 0 | 1 | 1 | 3730 | 82,5 | 103 | 61 | 70 | 90  | 71  | 41 | 6,3  |
| 290 | 0 | 0 | 0 | 1 | 0 | 3495 | 37,5 | 123 | 69 | 82 | 72  | 107 | 55 | 7,7  |
| 291 | 0 | 0 | 0 | 1 | 0 | 3495 | 37,5 | 125 | 72 | 83 | 62  | 115 | 61 | 7,1  |
| 292 | 0 | 0 | 0 | 1 | 0 | 3565 | 57,5 | 132 | 86 | 96 | 100 | 61  | 37 | 6,1  |
| 293 | 0 | 0 | 0 | 1 | 0 | 3565 | 57,5 | 125 | 76 | 87 | 93  | 87  | 50 | 8    |
| 294 | 0 | 0 | 0 | 1 | 1 | 3405 | 32,5 | 114 | 76 | 87 | 107 | 85  | 46 | 9,1  |
| 295 | 0 | 0 | 0 | 1 | 1 | 3405 | 32,5 | 111 | 79 | 88 | 99  | 85  | 47 | 8,4  |
| 296 | 0 | 0 | 0 | 1 | 1 | 3020 | 20   | 101 | 72 | 81 | 98  | 76  | 43 | 7,4  |

|     |   |   |   |   |   |      |      |     |    |    |     |     |    |      |
|-----|---|---|---|---|---|------|------|-----|----|----|-----|-----|----|------|
| 297 | 0 | 0 | 0 | 1 | 1 | 3020 | 20   | 111 | 74 | 84 | 102 | 90  | 50 | 9,2  |
| 298 | 0 | 0 | 2 | 1 | 0 | 2810 | 15   | 114 | 74 | 82 | 97  | 57  | 37 | 5,5  |
| 299 | 0 | 0 | 2 | 1 | 0 | 2810 | 15   | 122 | 74 | 84 | 105 | 56  | 37 | 5,8  |
| 300 | 0 | 0 | 0 | 1 | 1 | 3980 | 92,5 | 153 | 84 | 95 | 112 | 122 | 59 | 13,6 |
| 301 | 0 | 0 | 0 | 1 | 1 | 3980 | 92,5 | 127 | 90 | 99 | 101 | 98  | 48 | 9,9  |
| 302 | 0 | 0 | 0 | 1 | 0 | 2835 | 47,5 | 116 | 69 | 78 | 103 | 82  | 49 | 8,5  |
| 303 | 0 | 0 | 0 | 1 | 0 | 2835 | 47,5 | 118 | 68 | 83 | 107 | 72  | 43 | 7,7  |
| 304 | 0 | 0 | 0 | 1 | 0 | 3470 | 62,5 | 108 | 64 | 74 | 88  | 83  | 48 | 7,3  |
| 305 | 0 | 0 | 0 | 1 | 0 | 3470 | 62,5 | 101 | 63 | 73 | 93  | 81  | 49 | 7,6  |
| 306 | 0 | 0 | 0 | 1 | 0 | 3800 | 65   | 90  | 72 | 77 | 91  | 81  | 44 | 7,3  |
| 307 | 0 | 0 | 0 | 1 | 0 | 3800 | 65   | 113 | 78 | 86 | 108 | 85  | 46 | 9,1  |
| 308 | 0 | 0 | 0 | 1 | 0 | 4180 | 85   | 103 | 69 | 78 | 98  | 86  | 49 | 8,4  |
| 309 | 0 | 0 | 0 | 1 | 0 | 2950 | 15   | 121 | 82 | 92 | 108 | 63  | 35 | 6,7  |
| 310 | 0 | 0 | 0 | 1 | 0 | 2950 | 15   | 121 | 87 | 96 | 106 | 63  | 37 | 6,7  |
| 311 | 0 | 0 | 0 | 1 | 0 | 3470 | 65   | 100 | 69 | 76 | 103 | 64  | 38 | 6,5  |
| 312 | 0 | 0 | 0 | 1 | 0 | 3470 | 65   | 100 | 64 | 72 | 96  | 79  | 46 | 7,6  |
| 313 | 0 | 0 | 0 | 1 | 0 | 3310 | 22,5 | 108 | 75 | 85 | 94  | 78  | 45 | 7,4  |
| 314 | 0 | 0 | 0 | 1 | 0 | 3310 | 22,5 | 100 | 68 | 77 | 92  | 93  | 53 | 8,6  |
| 315 | 0 | 0 | 0 | 1 | 1 | 3040 | 77,5 | 106 | 66 | 76 | 63  | 100 | 57 | 6,2  |
| 316 | 0 | 0 | 0 | 1 | 1 | 3040 | 77,5 | 105 | 74 | 82 | 79  | 89  | 50 | 7,1  |
| 317 | 0 | 0 |   | 1 | 1 | 2675 | 30   | 109 | 78 | 86 | 93  | 74  | 40 | 6,9  |
| 318 | 0 | 0 |   | 1 | 1 | 2675 | 30   | 109 | 73 | 82 | 92  | 75  | 41 | 6,9  |
| 319 | 0 | 0 | 0 | 1 | 1 | 3660 | 77,5 | 141 | 86 | 97 | 112 | 82  | 37 | 9,2  |
| 320 | 0 | 0 | 0 | 1 | 1 | 3660 | 77,5 | 107 | 73 | 82 | 100 | 83  | 38 | 8,2  |
| 321 | 0 | 0 | 1 | 1 | 0 | 3425 | 80   | 109 | 69 | 79 | 90  | 70  | 42 | 6,3  |
| 322 | 0 | 0 | 0 | 1 | 1 | 3455 | 47,5 | 106 | 67 | 74 | 89  | 78  | 50 | 7    |
| 323 | 0 | 0 | 0 | 1 | 1 | 3455 | 47,5 | 111 | 66 | 78 | 79  | 79  | 52 | 6,3  |
| 324 | 0 | 0 | 0 | 1 | 0 | 3070 | 60   | 111 | 71 | 82 | 114 | 82  | 41 | 9,3  |
| 325 | 0 | 0 | 0 | 1 | 0 | 3070 | 60   | 111 | 73 | 81 | 97  | 75  | 39 | 7,3  |
| 326 | 0 | 0 | 0 | 1 | 0 | 3330 | 25   | 111 | 68 | 79 | 84  | 103 | 58 | 8,6  |
| 327 | 0 | 0 | 2 | 1 | 0 | 3155 | 30   | 117 | 72 | 82 | 100 | 77  | 45 | 7,7  |
| 328 | 0 | 0 | 2 | 1 | 0 | 3155 | 30   | 119 | 77 | 87 | 72  | 93  | 54 | 6,7  |
| 329 | 0 | 0 | 0 | 1 | 1 | 3055 | 35   | 114 | 70 | 80 | 116 | 50  | 29 | 5,7  |



|     |   |   |   |   |   |      |      |     |    |    |     |     |    |      |
|-----|---|---|---|---|---|------|------|-----|----|----|-----|-----|----|------|
| 330 | 0 | 0 | 0 | 1 | 1 | 2825 | 37,5 | 100 | 63 | 72 | 91  | 89  | 55 | 8    |
| 331 | 0 | 0 | 0 | 1 | 1 | 2825 | 37,5 | 108 | 70 | 80 | 88  | 67  | 43 | 5,9  |
| 332 | 0 | 0 | 0 | 1 | 1 | 3655 | 67,5 | 116 | 79 | 89 | 97  | 92  | 52 | 9    |
| 333 | 0 | 0 | 0 | 1 | 1 | 3655 | 67,5 | 120 | 83 | 92 | 79  | 72  | 44 | 5,7  |
| 334 | 0 | 0 | 0 | 1 | 0 | 3480 | 47,5 | 100 | 66 | 75 | 113 | 108 | 56 | 12,2 |
| 335 | 0 | 0 | 0 | 1 | 0 | 3480 | 47,5 | 105 | 62 | 75 | 87  | 109 | 56 | 9,5  |
| 336 | 0 | 0 | 0 | 1 | 1 | 3150 | 20   | 106 | 73 | 82 | 86  | 84  | 47 | 7,2  |
| 337 | 0 | 0 | 0 | 1 | 1 | 3150 | 20   | 122 | 85 | 94 | 86  | 86  | 49 | 7,4  |
| 338 | 0 | 0 | 0 | 1 | 0 | 4530 | 97,5 | 143 | 82 | 92 | 98  | 95  | 42 | 9,4  |
| 339 | 0 | 0 | 0 | 1 | 1 | 3415 | 72,5 | 106 | 64 | 75 | 82  | 76  | 43 | 6,3  |
| 340 | 0 | 0 | 0 | 1 | 1 | 3415 | 72,5 | 93  | 62 | 70 | 80  | 89  | 49 | 7,1  |
| 341 | 0 | 0 | 0 | 1 | 0 | 3840 | 70   | 110 | 67 | 78 | 107 | 85  | 48 | 9,1  |
| 342 | 0 | 0 | 0 | 1 | 0 | 3840 | 70   | 122 | 71 | 83 | 117 | 68  | 39 | 8    |
| 343 | 0 | 0 | 0 | 1 | 0 | 3640 | 52,5 | 112 | 66 | 77 | 88  | 70  | 41 | 6,2  |
| 344 | 0 | 0 | 0 | 1 | 0 | 3640 | 52,5 | 107 | 62 | 70 | 84  | 84  | 49 | 7,1  |
| 345 | 0 | 0 | 0 | 1 | 1 | 3035 | 37,5 | 112 | 76 | 84 | 123 | 53  | 31 | 6,6  |
| 346 | 0 | 0 | 0 | 1 | 1 | 3035 | 37,5 | 113 | 71 | 81 | 94  | 65  | 39 | 6,1  |
| 347 | 0 | 0 | 0 | 1 | 0 | 3815 | 67,5 | 105 | 71 | 79 | 92  | 72  | 39 | 6,7  |
| 348 | 0 | 0 | 0 | 1 | 0 | 3815 | 67,5 | 119 | 74 | 84 | 92  | 72  | 39 | 6,6  |
| 349 | 0 | 0 | 0 | 1 | 0 | 3520 | 32,5 | 115 | 71 | 83 | 114 | 54  | 32 | 6,1  |
| 350 | 0 | 0 | 0 | 1 | 0 | 3520 | 32,5 | 111 | 69 | 79 | 100 | 74  | 44 | 7,4  |
| 351 | 0 | 0 | 0 | 1 | 0 | 3660 | 65   | 115 | 78 | 87 | 107 | 61  | 36 | 6,6  |
| 352 | 0 | 0 | 0 | 1 | 0 | 3660 | 65   | 97  | 67 | 76 | 94  | 84  | 48 | 7,8  |
| 353 | 0 | 0 | 0 | 1 | 0 | 3490 | 37,5 | 109 | 83 | 92 | 99  | 58  | 36 | 5,8  |
| 354 | 0 | 0 | 0 | 1 | 0 | 3490 | 37,5 | 116 | 86 | 95 | 104 | 65  | 40 | 6,8  |
| 355 | 1 | 0 | 0 | 1 | 1 | 1765 | 15   | 110 | 76 | 84 | 100 | 57  | 38 | 5,7  |
| 356 | 1 | 0 | 0 | 1 | 1 | 1765 | 15   | 113 | 75 | 84 | 104 | 42  | 28 | 4,4  |
| 357 | 0 | 0 | 0 | 1 | 0 | 3395 | 40   | 110 | 73 | 83 | 88  | 116 |    | 10,2 |
| 358 | 0 | 0 | 0 | 1 | 0 | 3205 | 12,5 | 116 | 70 | 80 | 90  | 76  |    | 6,8  |
| 359 | 0 | 0 | 0 | 1 | 0 | 2670 | 22,5 | 124 | 76 | 88 | 101 | 76  |    | 7,7  |
| 360 | 0 | 0 | 0 | 1 | 0 | 2695 | 15   | 121 | 66 | 77 | 91  | 64  |    | 5,8  |
| 361 | 0 | 0 | 0 | 1 | 0 | 3555 | 42,5 | 98  | 65 | 75 | 119 | 56  |    | 6,6  |
| 362 | 0 | 0 | 0 | 1 | 0 | 3650 | 87,5 | 123 | 77 | 88 | 100 | 83  |    | 8,3  |

|     |   |   |   |   |   |      |      |     |    |     |     |     |    |      |
|-----|---|---|---|---|---|------|------|-----|----|-----|-----|-----|----|------|
| 363 | 0 | 0 | 0 | 1 | 1 | 2560 | 17,5 | 114 | 80 | 89  | 93  | 109 |    | 10,2 |
| 364 | 0 | 0 | 0 | 1 | 0 | 2920 | 12,5 | 135 | 87 | 99  | 81  | 76  |    | 6,1  |
| 365 | 0 | 0 | 0 | 1 | 0 | 3060 | 12,5 | 94  | 66 | 76  | 92  | 69  |    | 6,3  |
| 366 | 0 | 0 | 0 | 1 | 1 | 3370 | 40   | 111 | 63 | 74  | 94  | 80  |    | 7,5  |
| 367 | 0 | 0 | 0 | 1 | 0 | 3815 | 67,5 | 126 | 78 | 89  | 79  | 110 |    | 8,7  |
| 368 | 0 | 0 | 0 | 1 | 0 | 2820 | 32,5 | 119 | 71 | 83  | 92  | 82  |    | 7,6  |
| 369 | 0 | 0 | 0 | 1 | 0 | 3165 | 32,5 | 102 | 68 | 79  | 92  | 79  |    | 7,3  |
| 370 | 0 | 0 | 0 | 1 | 1 | 3045 | 22,5 | 103 | 59 | 70  | 98  | 71  |    | 6,9  |
| 371 | 0 | 0 | 0 | 1 | 1 | 4215 | 95   | 125 | 77 | 88  | 114 | 77  |    | 8,9  |
| 372 | 0 | 0 | 0 | 1 | 0 | 3310 | 45   | 114 | 71 | 85  | 90  | 61  |    | 5,5  |
| 373 | 0 | 0 | 0 | 1 | 0 | 2995 | 17,5 | 102 | 74 | 80  | 95  | 58  |    | 5,5  |
| 374 | 0 | 0 | 0 | 1 | 1 | 3430 | 72,5 | 102 | 75 | 83  | 82  | 86  |    | 7    |
| 375 | 0 | 0 | 0 | 1 | 0 | 3755 | 85   | 134 | 84 | 98  | 98  | 64  |    | 6,2  |
| 376 | 0 | 0 | 0 | 1 | 0 | 3325 | 32,5 | 103 | 66 | 75  | 94  | 72  |    | 6,7  |
| 377 | 0 | 0 | 0 | 1 | 0 | 3060 | 80   | 117 | 85 | 93  | 88  | 85  |    | 7,5  |
| 378 | 0 | 0 | 0 | 1 | 0 | 3965 | 77,5 | 84  | 69 | 75  | 112 | 65  |    | 7,3  |
| 379 | 0 | 0 | 0 | 1 | 0 | 3490 | 77,5 | 117 | 79 | 89  | 98  | 79  |    | 7,7  |
| 380 | 0 | 0 | 0 | 1 | 1 | 2995 | 42,5 | 115 | 83 | 92  | 115 | 69  |    | 7,9  |
| 381 | 0 | 0 | 0 | 1 | 0 | 4005 | 90   | 117 | 81 | 90  | 101 | 94  |    | 9,5  |
| 382 | 0 | 0 | 0 | 1 | 1 | 3680 | 90   | 121 | 73 | 83  | 84  | 134 |    | 11,2 |
| 383 | 0 | 0 | 0 | 1 | 1 | 3560 | 60   | 138 | 97 | 106 | 77  | 77  |    | 5,9  |
| 384 | 0 | 0 | 0 | 1 | 1 | 2655 | 12,5 | 123 | 80 | 90  | 96  | 73  |    | 6,9  |
| 385 | 0 | 0 | 0 | 2 | 0 | 3430 | 57,5 | 118 | 80 | 90  | 104 | 66  | 41 | 6,9  |
| 386 | 0 | 0 | 0 | 2 | 0 | 3430 | 57,5 | 123 | 82 | 93  | 93  | 60  | 38 | 5,6  |
| 387 | 0 | 0 | 0 | 2 | 0 | 3980 | 72,5 | 120 | 66 | 81  | 90  | 94  | 53 | 8,5  |
| 388 | 0 | 0 | 0 | 2 | 0 | 3980 | 72,5 | 106 | 68 | 76  | 77  | 91  | 52 | 7,1  |
| 389 | 0 | 0 | 0 | 2 | 1 | 2980 | 12,5 | 128 | 72 | 86  | 89  | 76  | 43 | 6,7  |
| 390 | 0 | 0 | 0 | 2 | 1 | 2980 | 12,5 | 114 | 67 | 78  | 81  | 86  | 48 | 6,9  |
| 391 | 0 | 0 | 0 | 2 | 1 | 3370 | 42,5 | 102 | 66 | 76  | 132 | 72  | 39 | 9,6  |
| 392 | 0 | 0 | 0 | 2 | 1 | 3370 | 42,5 | 105 | 61 | 71  | 98  | 87  | 49 | 8,5  |
| 393 | 0 | 0 | 1 | 2 | 0 | 3525 | 55   | 106 | 73 | 82  | 123 | 51  | 32 | 6,2  |
| 394 | 0 | 0 | 1 | 2 | 0 | 3525 | 55   | 101 | 75 | 83  | 116 | 51  | 33 | 6    |
| 395 | 0 | 0 | 0 | 2 | 1 | 3015 | 57,5 | 119 | 84 | 95  | 130 | 55  | 30 | 7,2  |

|     |   |   |   |   |   |      |      |     |    |    |     |     |    |      |
|-----|---|---|---|---|---|------|------|-----|----|----|-----|-----|----|------|
| 396 | 0 | 0 | 0 | 2 | 1 | 3015 | 57,5 | 124 | 87 | 97 | 117 | 67  | 37 | 7,9  |
| 397 | 0 | 0 | 0 | 2 | 0 | 3975 | 80   | 93  | 67 | 73 | 89  | 77  | 43 | 6,9  |
| 398 | 0 | 0 | 0 | 2 | 0 | 3975 | 80   | 118 | 86 | 95 | 105 | 73  | 41 | 7,6  |
| 399 | 0 | 0 | 0 | 2 | 1 | 3345 | 52,5 | 115 | 80 | 89 | 93  | 76  | 44 | 7,2  |
| 400 | 0 | 0 | 0 | 2 | 1 | 3345 | 52,5 | 107 | 69 | 79 | 96  | 80  | 45 | 7,7  |
| 401 | 0 | 0 | 0 | 2 | 1 | 3435 | 47,5 | 128 | 75 | 89 | 81  | 104 | 51 | 8,4  |
| 402 | 0 | 0 | 0 | 2 | 0 | 3765 | 75   | 125 | 83 | 93 | 108 | 93  | 46 | 10,1 |
| 403 | 0 | 0 | 0 | 2 | 0 | 3765 | 75   | 136 | 78 | 92 | 95  | 99  | 51 | 9,4  |
| 404 | 0 | 0 | 0 | 2 | 1 | 2965 | 50   | 105 | 70 | 80 | 102 | 88  | 51 | 8,9  |
| 405 | 0 | 0 | 0 | 2 | 0 | 3066 | 12,5 | 130 | 76 | 87 | 100 | 64  |    | 6,4  |
| 406 | 0 | 0 | 0 | 2 | 0 | 3400 | 20   | 108 | 74 | 83 | 89  | 64  |    | 5,7  |
| 407 | 0 | 0 | 0 | 2 | 0 | 3680 | 80   | 124 | 78 | 90 | 105 | 70  |    | 7,3  |
| 408 | 0 | 0 | 0 | 2 | 0 | 3405 | 60   | 117 | 72 | 83 | 74  | 122 |    | 9    |
| 409 | 0 | 0 | 0 | 2 | 0 | 3510 | 52,5 | 133 | 82 | 94 | 113 | 72  |    | 8,1  |
| 410 | 0 | 0 | 0 | 2 | 0 | 2940 | 27,5 | 91  | 58 | 67 | 96  | 72  |    | 6,9  |
| 411 | 0 | 0 | 0 | 2 | 1 | 3365 | 52,5 | 96  | 70 | 79 | 93  | 75  |    | 7    |
| 412 | 0 | 0 | 0 | 2 | 1 | 3575 | 62,5 | 114 | 77 | 83 | 88  | 93  |    | 8,1  |
| 413 | 0 | 0 | 0 | 2 | 1 | 3055 | 15   | 108 | 78 | 86 | 83  | 75  |    | 6,2  |
| 414 | 0 | 0 | 0 | 2 | 0 | 3556 | 42,5 | 125 | 72 | 85 | 90  | 66  |    | 5,9  |
| 415 | 1 | 0 | 0 | 2 | 0 | 2680 | 55   | 105 | 65 | 75 | 95  | 64  |    | 6,1  |
| 416 | 0 | 1 | 0 | 2 | 0 | 1400 | 35   | 109 | 83 | 90 | 94  | 60  |    | 5,6  |
| 417 | 0 | 0 |   | 2 | 0 | 3430 | 30   | 109 | 77 | 86 | 98  | 78  | 42 | 7,6  |
| 418 | 0 | 0 | 0 | 1 | 1 | 3200 | 35   | 102 | 65 | 75 | 82  | 87  | 56 | 7,1  |
| 419 | 0 | 0 | 0 | 1 | 1 | 3200 | 35   | 97  | 70 | 78 | 80  | 73  | 49 | 5,8  |
| 420 | 0 | 0 | 0 | 4 | 0 | 3060 | 22,5 | 109 | 69 | 78 | 90  | 65  |    | 5,8  |
| 421 | 0 | 0 | 0 | 4 | 0 | 3570 | 45   | 113 | 69 | 79 | 92  | 84  | 50 | 7,7  |
| 422 | 0 | 0 | 0 | 4 | 0 | 3570 | 45   | 109 | 75 | 83 | 95  | 74  | 45 | 7    |
| 423 | 0 | 0 | 0 | 4 | 0 | 3345 | 65   | 110 | 84 | 91 | 79  | 111 |    | 8,7  |
| 424 | 0 | 0 | 0 | 4 | 1 | 2775 | 20   | 101 | 63 | 73 | 81  | 82  | 50 | 6,7  |
| 425 | 0 | 0 | 0 | 4 | 1 | 2775 | 20   |     |    |    |     |     |    |      |
| 426 | 0 | 0 | 1 | 4 | 0 | 2550 | 15   | 109 | 70 | 80 | 87  | 82  |    | 7,1  |
| 427 | 0 | 0 | 0 | 4 | 0 | 3065 | 57,5 | 111 | 74 | 85 | 81  | 70  |    | 5,7  |
| 428 | 0 | 0 | 0 | 4 | 0 | 3200 | 22,5 | 100 | 59 | 70 | 77  | 70  |    | 5,4  |

|     |   |   |   |   |   |      |      |     |    |    |     |     |    |      |
|-----|---|---|---|---|---|------|------|-----|----|----|-----|-----|----|------|
| 429 | 0 | 0 | 0 | 4 | 0 | 3280 | 47,5 | 113 | 73 | 83 | 95  | 69  |    | 6,6  |
| 430 | 0 | 0 | 0 | 4 | 1 | 3250 | 27,5 | 100 | 65 | 74 | 87  | 111 | 60 | 9,7  |
| 431 | 0 | 0 | 0 | 4 | 1 | 3250 | 27,5 | 93  | 64 | 72 | 99  | 105 | 56 | 10,3 |
| 432 | 0 | 0 | 0 | 4 | 1 | 3535 | 82,5 | 115 | 80 | 90 | 95  | 74  |    | 7    |
| 433 | 0 | 0 | 0 | 4 | 0 | 2945 | 15   | 121 | 74 | 85 | 90  | 91  | 51 | 8,2  |
| 434 | 0 | 0 | 0 | 4 | 0 | 2945 | 15   | 122 | 81 | 90 | 91  | 88  | 50 | 8    |
| 435 | 0 | 0 | 0 | 4 | 1 | 3690 | 72,5 | 132 | 80 | 86 | 94  | 104 |    | 9,7  |
| 436 | 0 | 0 | 0 | 4 | 1 | 2995 | 42,5 | 102 | 74 | 81 | 111 | 46  |    | 5,1  |
| 437 | 0 | 0 | 0 | 4 | 1 | 4225 | 95   | 94  | 66 | 75 | 92  | 73  |    | 6,7  |
| 438 | 0 | 0 | 0 | 4 | 1 | 4370 | 97,5 | 101 | 67 | 78 | 107 | 100 | 50 | 10,6 |
| 439 | 0 | 0 | 0 | 4 | 1 | 4370 | 97,5 | 132 | 77 | 92 | 101 | 93  | 49 | 9,5  |
| 440 | 0 | 0 | 0 | 4 | 0 | 3365 | 17,5 | 109 | 76 | 86 | 85  | 93  | 43 | 7,9  |
| 441 | 0 | 0 | 0 | 4 | 0 | 3365 | 17,5 | 100 | 62 | 72 | 77  | 162 | 75 | 12,4 |
| 442 | 0 | 0 | 0 | 4 | 0 | 4290 | 92,5 | 124 | 84 | 95 | 89  | 91  | 50 | 8,2  |
| 443 | 0 | 0 | 0 | 4 | 0 | 4290 | 92,5 | 118 | 77 | 87 | 86  | 97  | 51 | 8,3  |
| 444 | 0 | 0 | 0 | 4 | 0 | 3260 | 15   | 103 | 74 | 83 | 88  | 66  | 39 | 5,8  |
| 445 | 0 | 0 | 0 | 4 | 0 | 3260 | 15   | 100 | 77 | 83 | 91  | 59  | 36 | 5,4  |
| 446 | 0 | 0 | 1 | 4 | 0 | 4120 | 97,5 | 146 | 82 | 95 | 84  | 128 | 56 | 10,7 |
| 447 | 0 | 0 | 1 | 4 | 0 | 4120 | 97,5 | 140 | 75 | 91 | 98  | 101 | 44 | 9,9  |
| 448 | 0 | 0 | 0 | 4 | 0 | 3575 | 57,5 | 118 | 79 | 90 | 88  | 90  |    | 7,9  |
| 449 | 0 | 0 | 0 | 4 | 0 | 3720 | 57,5 | 116 | 76 | 87 | 90  | 92  | 51 | 8,4  |
| 450 | 0 | 0 | 0 | 4 | 0 | 3670 | 67,5 | 118 | 75 | 86 | 112 | 78  | 45 | 8,7  |
| 451 | 0 | 0 | 0 | 4 | 0 | 3670 | 67,5 | 123 | 75 | 84 | 96  | 66  | 40 | 6,4  |
| 452 | 0 | 0 | 0 | 4 | 1 | 3340 | 50   | 117 | 68 | 80 | 82  | 48  |    | 4    |
| 453 | 0 | 0 | 0 | 4 | 0 | 3700 | 57,5 | 109 | 67 | 78 | 104 | 95  | 55 | 9,8  |
| 454 | 0 | 0 | 0 | 4 | 0 | 3700 | 57,5 | 113 | 73 | 83 | 91  | 78  | 46 | 7,1  |
| 455 | 0 | 0 | 0 | 4 | 1 | 3460 | 62,5 | 124 | 82 | 93 | 122 | 72  | 40 | 8,8  |
| 456 | 0 | 0 | 0 | 4 | 1 | 3460 | 62,5 | 135 | 86 | 96 | 120 | 65  | 36 | 7,9  |
| 457 | 0 | 0 | 0 | 4 | 1 | 3605 | 72,5 | 116 | 78 | 87 | 111 | 95  | 47 | 10,5 |
| 458 | 0 | 0 | 0 | 4 | 1 | 3680 | 70   | 119 | 81 | 91 | 116 | 74  |    | 8,6  |
| 459 | 0 | 0 | 0 | 4 | 1 | 3560 | 70   | 111 | 74 | 83 | 97  | 81  | 46 | 7,8  |
| 460 | 0 | 0 | 0 | 4 | 1 | 3560 | 70   | 124 | 79 | 89 | 88  | 72  | 43 | 6,4  |
| 461 | 0 | 0 | 0 | 4 | 1 | 3075 | 40   | 103 | 67 | 77 | 80  | 86  | 51 | 6,9  |

|     |   |   |   |   |   |      |      |     |    |     |     |     |    |      |
|-----|---|---|---|---|---|------|------|-----|----|-----|-----|-----|----|------|
| 462 | 0 | 0 | 0 | 4 | 1 | 3075 | 40   | 97  | 63 | 72  | 80  | 84  | 50 | 6,7  |
| 463 | 0 | 0 | 0 | 4 | 0 | 2840 | 17,5 | 122 | 69 | 81  | 107 | 58  | 38 | 6,2  |
| 464 | 0 | 0 | 0 | 4 | 0 | 2840 | 17,5 | 103 | 62 | 71  | 85  | 62  | 41 | 5,3  |
| 465 | 0 | 0 | 1 | 4 | 0 | 4050 | 82,5 | 108 | 68 | 78  | 95  | 115 | 57 | 10,9 |
| 466 | 0 | 0 | 1 | 4 | 0 | 4050 | 82,5 | 109 | 66 | 77  | 87  | 122 | 59 | 10,6 |
| 467 | 0 | 0 |   | 4 | 0 | 4770 | 97,5 |     |    |     |     |     |    |      |
| 468 | 0 | 0 | 1 | 4 | 0 | 3280 | 27,5 | 103 | 67 | 76  | 84  | 101 | 55 | 8,5  |
| 469 | 0 | 0 | 1 | 4 | 0 | 3280 | 27,5 | 109 | 73 | 82  | 88  | 75  | 42 | 6,7  |
| 470 | 0 | 0 |   | 4 | 0 | 3235 | 25   | 110 | 78 | 87  | 85  | 88  | 49 | 7,5  |
| 471 | 0 | 0 |   | 4 | 0 | 3235 | 25   | 117 | 77 | 88  | 92  | 97  | 52 | 8,9  |
| 472 | 0 | 0 |   | 4 | 0 | 3120 | 65   | 123 | 77 | 87  | 94  | 82  | 49 | 7,8  |
| 473 | 0 | 0 |   | 4 | 0 | 3120 | 65   | 108 | 77 | 86  | 96  | 64  | 40 | 6,2  |
| 474 | 0 | 0 | 0 | 0 | 0 | 3050 | 12,5 | 93  | 68 | 75  | 102 | 45  | 29 | 4,6  |
| 475 | 0 | 0 | 0 | 0 | 0 | 3050 | 12,5 | 94  | 64 | 73  | 86  | 63  | 38 | 5,4  |
| 476 | 0 | 0 | 0 | 0 | 1 | 2790 | 12,5 | 111 | 68 | 78  | 83  | 72  | 48 | 5,9  |
| 477 | 0 | 0 | 1 | 0 | 0 | 2740 | 12,5 | 121 | 87 | 96  | 97  | 70  | 40 | 6,8  |
| 478 | 0 | 0 | 1 | 0 | 0 | 2740 | 12,5 | 123 | 86 | 93  | 95  | 88  | 49 | 8,3  |
| 479 | 0 | 0 | 0 | 0 | 1 | 2790 | 12,5 | 101 | 66 | 76  | 87  | 67  | 45 | 5,9  |
| 480 | 0 | 0 | 0 | 0 | 0 | 3160 | 12,5 | 110 | 70 | 80  | 77  | 87  |    | 6,6  |
| 481 | 0 | 0 | 0 | 0 | 1 | 2945 | 15   | 107 | 72 | 82  | 100 | 72  | 47 | 7,2  |
| 482 | 0 | 0 | 0 | 0 | 1 | 3185 | 15   | 103 | 70 | 79  | 97  | 69  | 42 | 6,7  |
| 483 | 0 | 0 | 0 | 0 | 1 | 2945 | 15   | 109 | 71 | 81  | 96  | 65  | 43 | 6,3  |
| 484 | 0 | 0 | 0 | 0 | 1 | 2825 | 15   | 103 | 72 | 81  | 96  | 68  |    | 6,5  |
| 485 | 0 | 0 | 0 | 0 | 1 | 2970 | 15   | 116 | 71 | 82  | 84  | 72  | 46 | 6,1  |
| 486 | 0 | 0 | 0 | 0 | 0 | 3065 | 15   | 92  | 60 | 68  | 108 | 61  |    | 6,6  |
| 487 | 0 | 0 | 0 | 0 | 1 | 2970 | 15   | 117 | 68 | 76  | 77  | 92  | 57 | 7,1  |
| 488 | 0 | 0 | 0 | 0 | 0 | 3175 | 17,5 | 134 | 90 | 103 | 119 | 48  | 32 | 5,8  |
| 489 | 0 | 0 | 0 | 0 | 0 | 3175 | 17,5 | 117 | 83 | 93  | 105 | 59  | 39 | 6,2  |
| 490 | 0 | 0 | 0 | 0 | 0 | 3005 | 17,5 | 135 | 79 | 92  | 96  | 84  | 47 | 8    |
| 491 | 0 | 0 | 0 | 0 | 0 | 3005 | 17,5 | 131 | 76 | 89  | 95  | 99  | 54 | 9,5  |
| 492 | 0 | 0 | 0 | 0 | 0 | 3125 | 17,5 | 121 | 65 | 78  | 94  | 93  | 51 | 8,7  |
| 493 | 0 | 0 | 0 | 0 | 0 | 3125 | 17,5 | 118 | 65 | 76  | 86  | 90  | 50 | 7,8  |
| 494 | 0 | 0 | 0 | 0 | 1 | 3285 | 22,5 | 122 | 88 | 98  | 101 | 66  | 42 | 6,8  |

|     |   |   |   |   |   |      |      |     |    |    |     |     |    |     |
|-----|---|---|---|---|---|------|------|-----|----|----|-----|-----|----|-----|
| 495 | 0 | 0 | 0 | 0 | 1 | 3055 | 22,5 | 99  | 66 | 74 | 91  | 88  | 50 | 8   |
| 496 | 0 | 0 | 0 | 0 | 0 | 3220 | 22,5 | 110 | 71 | 81 | 100 | 63  | 38 | 6,3 |
| 497 | 0 | 0 | 0 | 0 | 1 | 3075 | 22,5 |     |    |    |     |     |    |     |
| 498 | 0 | 0 | 0 | 0 | 1 | 3285 | 22,5 | 122 | 77 | 88 | 111 | 52  | 34 | 5,8 |
| 499 | 0 | 0 | 0 | 0 | 0 | 3220 | 22,5 | 100 | 68 | 77 | 100 | 76  | 45 | 7,6 |
| 500 | 0 | 0 | 0 | 0 | 1 | 3055 | 22,5 | 97  | 66 | 75 | 93  | 78  | 46 | 7,3 |
| 501 | 0 | 0 | 0 | 0 | 1 | 3075 | 22,5 | 113 | 69 | 79 | 99  | 63  | 38 | 6,3 |
| 502 | 0 | 0 | 0 | 0 | 1 | 2835 | 25   | 123 | 82 | 93 | 107 | 66  | 42 | 7   |
| 503 | 0 | 0 | 0 | 0 | 0 | 3260 | 25   | 113 | 79 | 89 | 92  | 84  | 49 | 7,7 |
| 504 | 0 | 0 | 0 | 0 | 0 | 3260 | 25   | 107 | 76 | 85 | 97  | 75  | 43 | 7,3 |
| 505 | 0 | 0 | 0 | 0 | 1 | 2835 | 25   | 132 | 87 | 99 | 112 | 78  | 49 | 8,7 |
| 506 | 0 | 0 | 2 | 0 | 1 | 3110 | 25   | 103 | 64 | 73 | 76  | 72  | 44 | 5,4 |
| 507 | 0 | 0 | 2 | 0 | 1 | 3110 | 25   | 105 | 56 | 68 | 90  | 59  | 35 | 5,2 |
| 508 | 0 | 0 | 0 | 0 | 0 | 3110 | 27,5 | 119 | 81 | 92 | 101 | 67  | 39 | 6,7 |
| 509 | 0 | 0 | 0 | 0 | 0 | 3110 | 27,5 | 97  | 68 | 76 | 89  | 68  | 40 | 6,1 |
| 510 | 0 | 0 | 1 | 0 | 0 | 2935 | 27,5 | 107 | 79 | 87 | 99  | 65  |    | 6,4 |
| 511 | 0 | 0 | 0 | 0 | 1 | 2985 | 27,5 | 123 | 67 | 80 | 59  | 130 | 69 | 7,7 |
| 512 | 0 | 0 | 0 | 0 | 1 | 2985 | 27,5 | 125 | 73 | 87 | 75  | 122 | 64 | 9,1 |
| 513 | 0 | 0 | 0 | 0 | 1 | 3250 | 30   | 119 | 67 | 79 | 108 | 60  | 33 | 6,5 |
| 514 | 0 | 0 | 0 | 0 | 1 | 3250 | 30   | 116 | 77 | 86 | 107 | 63  | 35 | 6,7 |
| 515 | 0 | 0 | 0 | 0 | 0 | 3290 | 30   | 127 | 72 | 90 | 85  | 110 | 60 | 9,3 |
| 516 | 0 | 0 | 0 | 0 | 0 | 3290 | 30   | 113 | 76 | 86 | 91  | 102 | 54 | 9,2 |
| 517 | 0 | 0 |   | 0 | 1 | 3170 | 32,5 | 105 | 72 | 80 | 99  | 54  |    | 5,4 |
| 518 | 0 | 0 | 0 | 0 | 0 | 3015 | 32,5 | 109 | 75 | 85 | 104 | 74  | 41 | 7,7 |
| 519 | 0 | 0 | 0 | 0 | 0 | 2920 | 32,5 | 114 | 68 | 79 | 74  | 95  | 52 | 7   |
| 520 | 0 | 0 | 0 | 0 | 0 | 2920 | 32,5 | 117 | 77 | 85 | 75  | 100 | 55 | 7,5 |
| 521 | 0 | 0 | 0 | 0 | 1 | 3300 | 35   | 114 | 76 | 86 | 101 | 59  | 38 | 6   |
| 522 | 0 | 0 | 0 | 0 | 1 | 3300 | 35   | 97  | 66 | 75 | 98  | 81  | 50 | 8   |
| 523 | 0 | 0 | 0 | 0 | 1 | 3290 | 35   | 111 | 68 | 79 | 97  | 73  | 45 | 7,1 |
| 524 | 0 | 0 | 0 | 0 | 1 | 3290 | 35   | 101 | 74 | 82 | 95  | 78  | 47 | 7,4 |
| 525 | 0 | 0 | 0 | 0 | 0 | 3490 | 37,5 | 111 | 81 | 85 | 95  | 65  | 42 | 6,2 |
| 526 | 0 | 0 | 0 | 0 | 0 | 3180 | 37,5 | 111 | 71 | 79 | 97  | 92  | 50 | 8,9 |
| 527 | 0 | 0 | 0 | 0 | 1 | 3355 | 37,5 | 117 | 74 | 86 | 139 | 57  |    | 7,9 |

|     |   |   |   |   |   |      |      |     |     |     |     |     |    |     |
|-----|---|---|---|---|---|------|------|-----|-----|-----|-----|-----|----|-----|
| 528 | 0 | 0 | 0 | 0 | 0 | 3490 | 37,5 | 114 | 68  | 78  | 85  | 81  | 51 | 6,9 |
| 529 | 0 | 0 | 0 | 0 | 0 | 3180 | 37,5 | 107 | 70  | 79  | 109 | 81  | 46 | 8,9 |
| 530 | 0 | 0 | 0 | 0 | 1 | 3015 | 42,5 | 115 | 81  | 91  | 89  | 83  | 50 | 7,4 |
| 531 | 0 | 0 | 0 | 0 | 1 | 3400 | 42,5 | 102 | 69  | 77  | 92  | 59  | 38 | 5,4 |
| 532 | 0 | 0 | 0 | 0 | 1 | 3015 | 42,5 | 115 | 77  | 87  | 91  | 94  | 57 | 8,5 |
| 533 | 0 | 0 | 0 | 0 | 1 | 3400 | 42,5 | 103 | 75  | 84  | 101 | 49  | 32 | 5   |
| 534 | 0 | 0 | 0 | 0 | 0 | 3445 | 45   | 131 | 85  | 96  | 116 | 75  | 42 | 8,7 |
| 535 | 0 | 0 | 0 | 0 | 1 | 3290 | 45   | 107 | 74  | 84  | 85  | 89  | 46 | 7,5 |
| 536 | 0 | 0 | 0 | 0 | 1 | 3290 | 45   | 105 | 72  | 81  | 87  | 98  | 50 | 8,5 |
| 537 | 0 | 0 | 0 | 0 | 0 | 3310 | 45   | 100 | 74  | 82  | 92  | 60  |    | 5,5 |
| 538 | 0 | 0 | 0 | 0 | 1 | 3470 | 47,5 | 109 | 67  | 78  | 93  | 70  | 42 | 6,5 |
| 539 | 0 | 0 | 0 | 0 | 0 | 3470 | 47,5 | 118 | 87  | 96  | 83  | 63  |    | 5,2 |
| 540 | 0 | 0 | 0 | 0 | 1 | 3470 | 47,5 | 123 | 74  | 85  | 107 | 78  | 46 | 8,3 |
| 541 | 0 | 0 | 0 | 0 | 0 | 3505 | 50   | 115 | 76  | 86  | 107 | 61  |    | 6,5 |
| 542 | 0 | 0 | 0 | 0 | 1 | 3200 | 50   | 101 | 79  | 86  | 83  | 61  |    | 5,1 |
| 543 | 0 | 0 | 0 | 0 | 1 | 3360 | 52,5 | 133 | 79  | 93  | 90  | 86  | 53 | 7,8 |
| 544 | 0 | 0 | 0 | 0 | 1 | 3360 | 52,5 | 115 | 77  | 87  | 88  | 74  | 46 | 6,5 |
| 545 | 0 | 0 | 0 | 0 | 0 | 3160 | 55   | 99  | 70  | 79  | 97  | 65  | 42 | 6,3 |
| 546 | 0 | 0 | 0 | 0 | 0 | 3160 | 55   | 117 | 75  | 85  | 101 | 63  | 40 | 6,3 |
| 547 | 0 | 0 | 1 | 0 | 0 | 3030 | 55   | 107 | 73  | 83  | 84  | 65  |    | 5,4 |
| 548 | 0 | 0 | 0 | 0 | 0 | 3780 | 55   | 119 | 76  | 88  | 74  | 105 |    | 7,8 |
| 549 | 0 | 0 | 0 | 0 | 0 | 3830 | 57,5 | 105 | 70  | 79  | 92  | 68  |    | 6,2 |
| 550 | 0 | 0 | 0 | 0 | 0 | 3605 | 60   | 110 | 74  | 84  | 113 | 64  | 36 | 7,2 |
| 551 | 0 | 0 | 0 | 0 | 1 | 3280 | 60   | 100 | 71  | 79  | 107 | 50  |    | 5,3 |
| 552 | 0 | 0 | 0 | 0 | 0 | 3605 | 60   | 125 | 76  | 87  | 100 | 73  | 42 | 7,3 |
| 553 | 0 | 0 | 0 | 0 | 0 | 3765 | 62,5 | 119 | 77  | 87  | 95  | 70  | 35 | 6,7 |
| 554 | 0 | 0 | 0 | 0 | 0 | 3765 | 62,5 | 121 | 80  | 90  | 82  | 101 | 51 | 8,3 |
| 555 | 0 | 0 | 0 | 0 | 0 | 3765 | 62,5 | 107 | 79  | 86  | 109 | 68  | 40 | 7,5 |
| 556 | 0 | 0 | 0 | 0 | 0 | 3765 | 62,5 | 125 | 105 | 112 | 92  | 96  | 54 | 8,8 |
| 557 | 0 | 0 | 0 | 0 | 0 | 3490 | 65   | 109 | 75  | 84  | 112 | 77  |    | 8,6 |
| 558 | 0 | 0 | 0 | 0 | 1 | 3640 | 65   | 117 | 76  | 83  | 101 | 56  | 32 | 5,6 |
| 559 | 0 | 0 | 0 | 0 | 1 | 3485 | 65   | 114 | 79  | 88  | 80  | 85  | 50 | 6,7 |
| 560 | 0 | 0 | 0 | 0 | 1 | 3485 | 65   | 116 | 74  | 84  | 84  | 92  | 53 | 7,7 |

|     |   |   |   |   |   |      |      |     |    |    |     |     |    |      |
|-----|---|---|---|---|---|------|------|-----|----|----|-----|-----|----|------|
| 561 | 0 | 0 | 0 | 0 | 0 | 3465 | 65   | 133 | 84 | 95 | 89  | 87  | 51 | 7,7  |
| 562 | 0 | 0 | 0 | 0 | 0 | 3465 | 65   | 107 | 76 | 86 | 92  | 106 | 61 | 9,8  |
| 563 | 0 | 0 | 0 | 0 | 1 | 3750 | 67,5 | 107 | 84 | 91 | 110 | 92  | 45 | 10,1 |
| 564 | 0 | 0 | 0 | 0 | 1 | 3750 | 67,5 | 127 | 78 | 87 | 96  | 94  | 47 | 8,9  |
| 565 | 0 | 0 | 0 | 0 | 0 | 3490 | 67,5 | 124 | 81 | 91 | 108 | 69  | 42 | 7,4  |
| 566 | 0 | 0 | 0 | 0 | 1 | 3500 | 67,5 | 106 | 58 | 69 | 99  | 92  | 51 | 9,1  |
| 567 | 0 | 0 | 0 | 0 | 0 | 3490 | 67,5 | 108 | 75 | 84 | 95  | 66  | 41 | 6,2  |
| 568 | 0 | 0 | 0 | 0 | 1 | 3500 | 67,5 | 113 | 72 | 83 | 88  | 86  | 47 | 7,5  |
| 569 | 0 | 0 | 0 | 0 | 0 | 3490 | 67,5 | 111 | 71 | 82 | 80  | 77  |    | 6,1  |
| 570 | 0 | 0 | 0 | 0 | 0 | 3880 | 70   | 124 | 73 | 84 | 100 | 108 | 58 | 10,8 |
| 571 | 0 | 0 | 0 | 0 | 0 | 3535 | 70   | 99  | 74 | 83 | 108 | 79  |    | 8,5  |
| 572 | 0 | 0 | 0 | 0 | 0 | 3880 | 70   | 133 | 78 | 93 | 106 | 89  | 49 | 9,4  |
| 573 | 0 | 0 | 1 | 0 | 1 | 3390 | 70   | 98  | 69 | 78 | 77  | 67  |    | 5,1  |
| 574 | 0 | 0 | 0 | 0 | 0 | 4005 | 72,5 | 109 | 65 | 76 | 114 | 44  | 29 | 5    |
| 575 | 0 | 0 | 0 | 0 | 1 | 3800 | 72,5 | 102 | 73 | 81 | 93  | 76  | 44 | 7,1  |
| 576 | 0 | 0 | 0 | 0 | 0 | 4005 | 72,5 | 105 | 62 | 72 | 111 | 64  | 41 | 7,1  |
| 577 | 0 | 0 | 0 | 0 | 1 | 3585 | 72,5 | 111 | 69 | 81 | 96  | 65  | 46 | 6,3  |
| 578 | 0 | 0 | 0 | 0 | 1 | 3800 | 72,5 | 101 | 75 | 83 | 95  | 72  | 43 | 6,9  |
| 579 | 0 | 0 | 0 | 0 | 1 | 3565 | 72,5 | 110 | 72 | 82 | 100 | 71  | 44 | 7,1  |
| 580 | 0 | 0 | 0 | 0 | 1 | 3565 | 72,5 | 115 | 76 | 85 | 87  | 76  | 47 | 6,7  |
| 581 | 0 | 0 | 0 | 0 | 1 | 3585 | 72,5 | 115 | 72 | 82 | 104 | 78  | 53 | 8,2  |
| 582 | 0 | 0 | 0 | 0 | 0 | 3730 | 72,5 | 117 | 74 | 84 | 89  | 67  | 41 | 6    |
| 583 | 0 | 0 | 0 | 0 | 0 | 3730 | 72,5 | 135 | 85 | 97 | 106 | 54  | 34 | 5,8  |
| 584 | 0 | 0 | 0 | 0 | 1 | 3615 | 75   | 122 | 85 | 95 | 99  | 82  | 42 | 8    |
| 585 | 0 | 0 | 0 | 0 | 1 | 3615 | 75   | 118 | 83 | 93 | 91  | 94  | 51 | 8,5  |
| 586 | 0 | 0 | 0 | 0 | 1 | 3615 | 75   | 121 | 66 | 77 | 93  | 86  | 46 | 8    |
| 587 | 0 | 0 | 0 | 0 | 1 | 3500 | 77,5 | 103 | 76 | 85 | 103 | 67  | 41 | 6,9  |
| 588 | 0 | 0 | 0 | 0 | 1 | 3500 | 77,5 | 100 | 72 | 80 | 97  | 71  | 43 | 6,9  |
| 589 | 0 | 0 | 0 | 0 | 1 | 3900 | 80   | 93  | 66 | 74 | 105 | 61  | 41 | 6,4  |
| 590 | 0 | 0 | 0 | 0 | 0 | 4010 | 80   | 111 | 70 | 80 | 113 | 60  | 35 | 6,7  |
| 591 | 0 | 0 | 0 | 0 | 0 | 4010 | 80   | 109 | 77 | 85 | 91  | 82  | 47 | 7,5  |
| 592 | 0 | 0 | 0 | 0 | 0 | 3665 | 80   | 108 | 76 | 85 | 90  | 73  | 42 | 6,6  |
| 593 | 0 | 0 | 0 | 0 | 0 | 3675 | 80   | 94  | 65 | 73 | 86  | 94  | 50 | 8,1  |



|     |   |   |   |   |   |      |      |     |    |     |     |     |    |      |
|-----|---|---|---|---|---|------|------|-----|----|-----|-----|-----|----|------|
| 594 | 0 | 0 | 0 | 0 | 1 | 3330 | 80   | 100 | 57 | 65  | 86  | 88  | 49 | 7,6  |
| 595 | 0 | 0 | 0 | 0 | 1 | 3330 | 80   | 98  | 63 | 72  | 89  | 80  | 45 | 7,2  |
| 596 | 0 | 0 | 0 | 0 | 0 | 3985 | 80   | 124 | 86 | 96  | 80  | 88  | 44 | 7,1  |
| 597 | 0 | 0 | 0 | 0 | 1 | 3900 | 80   | 102 | 68 | 77  | 102 | 62  | 42 | 6,4  |
| 598 | 0 | 0 | 0 | 0 | 0 | 3665 | 80   | 119 | 71 | 81  | 89  | 81  | 45 | 7,2  |
| 599 | 0 | 0 | 0 | 0 | 1 | 3830 | 80   | 97  | 66 | 75  | 100 | 90  | 49 | 9    |
| 600 | 0 | 0 | 0 | 0 | 0 | 3675 | 80   | 92  | 74 | 80  | 92  | 89  | 49 | 8,2  |
| 601 | 0 | 0 | 0 | 0 | 1 | 3695 | 80   | 144 | 80 | 92  | 90  | 127 | 57 | 11,4 |
| 602 | 0 | 0 | 0 | 0 | 1 | 3830 | 80   | 102 | 62 | 71  | 76  | 100 | 56 | 7,6  |
| 603 | 0 | 0 | 0 | 0 | 1 | 3695 | 80   | 122 | 75 | 87  | 88  | 135 | 60 | 11,8 |
| 604 | 0 | 0 | 0 | 0 | 0 | 3705 | 82,5 | 124 | 74 | 85  | 122 | 60  | 35 | 7,3  |
| 605 | 0 | 0 | 0 | 0 | 0 | 3875 | 82,5 | 122 | 75 | 87  | 76  | 78  | 45 | 5,9  |
| 606 | 0 | 0 | 0 | 0 | 0 | 3860 | 82,5 | 111 | 80 | 88  | 96  | 74  | 43 | 7,1  |
| 607 | 0 | 0 | 0 | 0 | 0 | 3705 | 82,5 | 110 | 73 | 83  | 104 | 70  | 42 | 7,3  |
| 608 | 0 | 0 | 0 | 0 | 0 | 3875 | 82,5 | 118 | 84 | 94  | 88  | 63  | 38 | 5,5  |
| 609 | 0 | 0 | 0 | 0 | 0 | 3730 | 82,5 | 119 | 80 | 90  | 99  | 85  |    | 8,4  |
| 610 | 0 | 0 | 0 | 0 | 0 | 3860 | 82,5 | 131 | 84 | 95  | 86  | 69  | 41 | 5,9  |
| 611 | 0 | 0 | 0 | 0 | 1 | 3960 | 85   | 134 | 88 | 99  | 93  | 86  | 46 | 8    |
| 612 | 0 | 0 | 0 | 0 | 1 | 3960 | 85   | 126 | 79 | 89  | 109 | 90  | 47 | 9,7  |
| 613 | 0 | 0 | 1 | 0 | 1 | 3905 | 87,5 | 117 | 76 | 87  | 98  | 83  | 45 | 8,2  |
| 614 | 0 | 0 | 1 | 0 | 1 | 3905 | 87,5 | 114 | 75 | 85  | 90  | 77  | 43 | 6,9  |
| 615 | 0 | 0 | 0 | 0 | 0 | 3545 | 90   | 120 | 81 | 90  | 82  | 93  | 46 | 7,6  |
| 616 | 0 | 0 | 0 | 0 | 1 | 4115 | 90   | 102 | 71 | 79  | 98  | 77  | 37 | 7,6  |
| 617 | 0 | 0 | 0 | 0 | 0 | 4035 | 90   | 122 | 94 | 103 | 101 | 59  | 33 | 6    |
| 618 | 0 | 0 | 0 | 0 | 0 | 4035 | 90   | 92  | 66 | 74  | 96  | 71  | 39 | 6,8  |
| 619 | 0 | 0 | 0 | 0 | 0 | 3545 | 90   | 138 | 88 | 100 | 82  | 79  | 40 | 6,5  |
| 620 | 0 | 0 | 0 | 0 | 0 | 3990 | 90   | 102 | 70 | 78  | 84  | 78  | 48 | 6,6  |
| 621 | 0 | 0 | 0 | 0 | 0 | 4115 | 92,5 | 122 | 83 | 93  | 121 | 70  | 37 | 8,5  |
| 622 | 0 | 0 | 0 | 0 | 0 | 3420 | 92,5 | 99  | 69 | 78  | 110 | 81  | 43 | 8,8  |
| 623 | 0 | 0 | 0 | 0 | 0 | 4115 | 92,5 | 123 | 86 | 96  | 109 | 82  | 43 | 9    |
| 624 | 0 | 0 | 0 | 0 | 1 | 3805 | 92,5 | 124 | 79 | 90  | 89  | 130 | 68 | 11,6 |
| 625 | 0 | 0 | 0 | 0 | 1 | 3805 | 92,5 | 147 | 88 | 101 | 84  | 112 | 59 | 9,5  |
| 626 | 0 | 0 | 0 | 0 | 1 | 4120 | 92,5 | 141 | 81 | 97  | 106 | 103 |    | 10,8 |

|     |   |   |   |   |   |      |      |     |     |     |     |     |    |      |
|-----|---|---|---|---|---|------|------|-----|-----|-----|-----|-----|----|------|
| 627 | 0 | 0 | 0 | 0 | 0 | 3420 | 92,5 | 121 | 71  | 81  | 106 | 81  | 44 | 8,5  |
| 628 | 0 | 0 | 0 | 0 | 0 | 3895 | 95   | 119 | 84  | 93  | 104 | 77  | 34 | 8    |
| 629 | 0 | 0 | 0 | 0 | 1 | 4040 | 95   | 124 | 69  | 86  | 90  | 93  | 52 | 8,4  |
| 630 | 0 | 0 | 0 | 0 | 0 | 4340 | 95   | 134 | 76  | 92  | 97  | 98  |    | 9,5  |
| 631 | 0 | 0 | 0 | 0 | 1 | 4040 | 95   | 115 | 73  | 83  | 91  | 82  | 48 | 7,5  |
| 632 | 0 | 0 | 0 | 0 | 0 | 3895 | 95   | 129 | 92  | 101 | 96  | 76  | 34 | 7,3  |
| 633 | 0 | 0 | 0 | 0 | 0 | 3895 | 95   | 156 | 92  | 109 | 98  | 81  | 37 | 7,9  |
| 634 | 0 | 0 | 0 | 0 | 1 | 3855 | 95   | 130 | 73  | 86  | 77  | 102 | 51 | 7,9  |
| 635 | 0 | 0 | 3 | 0 | 0 | 4030 | 95   | 91  | 66  | 73  | 96  | 72  | 45 | 7    |
| 636 | 0 | 0 | 0 | 0 | 1 | 3855 | 95   | 131 | 74  | 85  | 94  | 83  | 43 | 7,8  |
| 637 | 0 | 0 | 0 | 0 | 0 | 4190 | 97,5 | 122 | 75  | 85  | 106 | 112 | 55 | 11,8 |
| 638 | 0 | 0 | 0 | 0 | 0 | 4190 | 97,5 | 130 | 79  | 92  | 97  | 89  | 44 | 8,6  |
| 639 | 0 | 0 | 0 | 0 | 0 | 4445 | 97,5 |     |     |     |     |     |    |      |
| 640 | 0 | 0 | 0 | 0 | 1 | 4270 | 97,5 | 113 | 77  | 86  | 104 | 84  | 48 | 8,7  |
| 641 | 0 | 0 | 0 | 0 | 0 | 4445 | 97,5 | 158 | 109 | 120 | 91  | 109 | 50 | 10   |
| 642 | 0 | 0 | 0 | 0 | 1 | 4270 | 97,5 | 115 | 77  | 86  | 94  | 82  | 48 | 7,7  |
| 643 | 0 | 0 | 0 | 0 | 0 | 4135 | 97,5 | 119 | 79  | 88  | 90  | 80  |    | 7,1  |
| 644 | 0 | 0 | 0 | 0 | 1 | 2845 | 15   | 130 | 86  | 97  | 101 | 89  | 50 | 9    |
| 645 | 0 | 0 | 0 | 0 | 1 | 2845 | 15   | 140 | 91  | 102 | 105 | 82  | 46 | 8,6  |
| 646 | 0 | 0 | 0 | 0 | 1 | 3325 | 62,5 | 118 | 72  | 82  | 105 | 82  | 46 | 8,6  |
| 647 | 0 | 0 | 0 | 0 | 1 | 3325 | 62,5 | 109 | 71  | 81  | 97  | 92  | 51 | 8,8  |
| 648 | 0 | 0 | 0 | 0 | 1 | 3845 | 82,5 | 110 | 66  | 77  | 80  | 93  | 51 | 7,4  |
| 649 | 0 | 0 | 0 | 0 | 1 | 3845 | 82,5 | 106 | 69  | 79  | 75  | 86  | 48 | 6,4  |
| 650 | 0 | 0 | 0 | 0 | 0 | 3145 | 12,5 | 123 | 72  | 83  | 78  | 97  |    | 7,6  |
| 651 | 0 | 0 | 0 | 0 | 1 | 3690 | 80   | 118 | 80  | 90  | 114 | 73  | 42 | 8,4  |
| 652 | 0 | 0 | 0 | 0 | 1 | 3360 | 67,5 | 150 | 88  | 101 | 102 | 87  | 47 | 8,9  |
| 653 | 0 | 0 | 0 | 0 | 1 | 3360 | 67,5 | 132 | 89  | 100 | 110 | 70  | 38 | 7,8  |
| 654 | 0 | 0 | 0 | 0 | 0 | 3455 | 62,5 | 108 | 78  | 88  | 99  | 71  | 44 | 7    |
| 655 | 0 | 0 | 0 | 0 | 0 | 3455 | 62,5 | 127 | 81  | 94  | 93  | 54  | 35 | 5    |
| 656 | 0 | 0 | 0 | 0 | 0 | 3535 | 60   | 118 | 79  | 89  | 123 | 72  |    | 8,9  |
| 657 | 0 | 0 | 0 | 0 | 0 | 3860 | 70   | 105 | 73  | 82  | 86  | 65  | 41 | 5,6  |
| 658 | 0 | 0 | 0 | 0 | 0 | 3295 | 30   | 113 | 82  | 91  | 92  | 64  | 41 | 5,9  |
| 659 | 0 | 0 | 0 | 0 | 0 | 3295 | 30   | 109 | 74  | 84  | 87  | 69  | 44 | 6    |

|     |   |   |   |   |   |      |      |     |    |     |     |     |    |     |
|-----|---|---|---|---|---|------|------|-----|----|-----|-----|-----|----|-----|
| 660 | 0 | 0 | 0 | 0 | 0 | 3750 | 60   | 101 | 81 | 88  | 104 | 77  |    | 8   |
| 661 | 0 | 0 | 0 | 0 | 0 | 4235 | 97,5 | 105 | 64 | 74  | 99  | 87  | 47 | 8,6 |
| 662 | 0 | 0 | 0 | 0 | 0 | 4235 | 97,5 | 90  | 67 | 74  | 96  | 75  | 42 | 7,1 |
| 663 | 0 | 0 | 0 | 0 | 1 | 3520 | 55   | 108 | 73 | 83  | 111 | 75  | 40 | 8,2 |
| 664 | 0 | 0 | 0 | 0 | 1 | 3520 | 55   | 124 | 79 | 90  | 99  | 75  | 41 | 7,2 |
| 665 | 0 | 0 | 0 | 0 | 1 | 3810 | 87,5 | 130 | 68 | 80  | 82  | 95  |    | 7,8 |
| 666 | 0 | 0 | 0 | 0 | 0 | 3675 | 67,5 | 121 | 73 | 84  | 88  | 111 | 60 | 9,8 |
| 667 | 0 | 0 | 0 | 0 | 0 | 3675 | 67,5 | 114 | 77 | 87  | 93  | 104 | 56 | 9,6 |
| 668 | 0 | 0 | 0 | 0 | 0 | 3720 | 72,5 | 125 | 74 | 86  | 88  | 111 | 60 | 9,7 |
| 669 | 0 | 0 | 0 | 0 | 0 | 3720 | 72,5 | 119 | 71 | 82  | 92  | 86  | 48 | 7,9 |
| 670 | 0 | 0 | 0 | 0 | 1 | 3400 | 55   | 123 | 81 | 90  | 97  | 94  |    | 9,1 |
| 671 | 0 | 0 | 2 | 0 | 0 | 4070 | 82,5 | 100 | 74 | 82  | 102 | 65  | 38 | 6,6 |
| 672 | 0 | 0 | 2 | 0 | 0 | 4070 | 82,5 | 102 | 71 | 80  | 117 | 66  | 38 | 7,7 |
| 673 | 0 | 0 | 0 | 0 | 1 | 3650 | 67,5 | 123 | 81 | 91  | 73  | 95  |    | 6,9 |
| 674 | 0 | 0 | 0 | 0 | 1 | 3840 | 87,5 | 111 | 80 | 89  | 95  | 68  | 39 | 6,4 |
| 675 | 0 | 0 | 0 | 0 | 1 | 3840 | 87,5 | 122 | 79 | 89  | 94  | 58  | 34 | 5,4 |
| 676 | 0 | 0 | 0 | 0 | 0 | 3670 | 67,5 | 115 | 76 | 86  | 87  | 72  | 42 | 6,3 |
| 677 | 0 | 0 | 0 | 0 | 0 | 3570 | 72,5 | 122 | 73 | 84  | 72  | 91  | 53 | 6,6 |
| 678 | 0 | 0 | 2 | 0 | 1 | 4010 | 87,5 | 103 | 75 | 83  | 90  | 84  | 45 | 7,6 |
| 679 | 0 | 0 | 2 | 0 | 1 | 4010 | 87,5 | 109 | 73 | 84  | 93  | 87  | 46 | 8,1 |
| 680 | 0 | 0 | 0 | 0 | 1 | 3810 | 92,5 | 123 | 73 | 86  | 72  | 99  |    | 7,2 |
| 681 | 0 | 0 | 0 | 0 | 1 | 3270 | 60   | 135 | 90 | 102 | 102 | 77  | 41 | 7,8 |
| 682 | 0 | 0 | 0 | 0 | 1 | 4570 | 97,5 | 117 | 79 | 89  | 108 | 93  |    | 10  |
| 683 | 0 | 0 | 0 | 0 | 0 | 3505 | 50   | 109 | 72 | 81  | 93  | 90  | 53 | 8,4 |
| 684 | 0 | 0 | 0 | 0 | 0 | 3505 | 50   | 115 | 70 | 82  | 74  | 112 | 65 | 8,3 |
| 685 | 0 | 0 | 0 | 0 | 1 | 3625 | 92,5 | 108 | 68 | 78  | 84  | 88  | 45 | 7,4 |
| 686 | 0 | 0 | 0 | 0 | 1 | 3625 | 92,5 | 93  | 66 | 74  | 84  | 75  | 39 | 6,2 |
| 687 | 0 | 0 | 0 | 0 | 1 | 3335 | 47,5 | 105 | 70 | 79  | 92  | 72  | 41 | 6,6 |
| 688 | 0 | 0 | 0 | 0 | 1 | 3335 | 47,5 | 111 | 80 | 88  | 99  | 60  | 34 | 5,9 |
| 689 | 0 | 0 | 0 | 0 | 0 | 3760 | 75   | 119 | 79 | 89  | 100 | 69  |    | 7   |
| 690 | 0 | 0 | 0 | 0 | 1 | 3190 | 60   | 113 | 78 | 88  | 87  | 63  | 40 | 5,5 |
| 691 | 0 | 0 | 0 | 0 | 1 | 3190 | 60   | 97  | 55 | 65  | 111 | 64  | 40 | 7,1 |
| 692 | 0 | 0 | 1 | 0 | 0 | 3620 | 75   | 111 | 76 | 86  | 84  | 99  | 50 | 8,3 |

|     |   |   |   |   |   |      |      |     |    |     |     |     |    |      |
|-----|---|---|---|---|---|------|------|-----|----|-----|-----|-----|----|------|
| 693 | 0 | 0 | 1 | 0 | 0 | 3620 | 75   | 107 | 76 | 85  | 83  | 97  | 52 | 8,1  |
| 694 | 0 | 0 | 1 | 0 | 0 | 3620 | 75   | 116 | 81 | 90  | 83  | 94  | 51 | 7,8  |
| 695 | 0 | 0 | 1 | 0 | 1 | 3120 | 17,5 | 106 | 73 | 82  | 91  | 73  |    | 6,7  |
| 696 | 0 | 0 | 0 | 0 | 1 | 3035 | 32,5 | 102 | 75 | 83  | 91  | 57  |    | 5,2  |
| 697 | 0 | 0 | 1 | 0 | 1 | 3550 | 82,5 | 109 | 77 | 86  | 86  | 73  | 40 | 6,2  |
| 698 | 0 | 0 | 0 | 0 | 1 | 3195 | 62,5 | 122 | 80 | 91  | 91  | 80  | 47 | 7,2  |
| 699 | 0 | 0 | 0 | 0 | 1 | 3195 | 62,5 | 116 | 84 | 94  | 95  | 59  | 36 | 5,6  |
| 700 | 0 | 0 | 2 | 0 | 0 | 3530 | 55   | 106 | 68 | 79  | 87  | 79  | 47 | 6,8  |
| 701 | 0 | 0 | 2 | 0 | 0 | 3530 | 55   | 103 | 74 | 83  | 82  | 69  | 42 | 5,6  |
| 702 | 0 | 0 | 0 | 0 | 0 | 3420 | 57,5 | 98  | 67 | 75  | 91  | 63  |    | 5,7  |
| 703 | 0 | 0 | 0 | 0 | 0 | 3840 | 67,5 | 103 | 72 | 81  | 90  | 82  |    | 7,4  |
| 704 | 0 | 0 | 0 | 0 | 1 | 2645 | 12,5 | 122 | 68 | 80  | 84  | 123 |    | 10,3 |
| 705 | 0 | 0 | 0 | 0 | 1 | 2945 | 15   | 128 | 81 | 93  | 96  | 100 |    | 9,5  |
| 706 | 0 | 0 | 0 | 0 | 0 | 3105 | 25   | 118 | 80 | 91  | 91  | 99  |    | 9    |
| 707 | 0 | 0 | 0 | 0 | 0 | 3370 | 27,5 | 108 | 78 | 86  | 98  | 108 |    | 10,6 |
| 708 | 0 | 0 | 0 | 0 | 1 | 3360 | 27,5 | 101 | 68 | 77  | 86  | 72  |    | 6,2  |
| 709 | 0 | 0 | 0 | 0 | 1 | 2885 | 30   | 117 | 81 | 91  | 88  | 74  |    | 6,5  |
| 710 | 0 | 0 | 0 | 0 | 0 | 3280 | 30   | 109 | 73 | 82  | 90  | 61  |    | 5,5  |
| 711 | 0 | 0 | 0 | 0 | 0 | 3315 | 32,5 | 110 | 75 | 84  | 102 | 68  |    | 6,9  |
| 712 | 0 | 0 | 0 | 0 | 1 | 3060 | 35   | 100 | 67 | 76  | 91  | 65  |    | 5,9  |
| 713 | 0 | 0 | 0 | 0 | 0 | 3335 | 35   | 116 | 68 | 77  | 98  | 68  |    | 6,7  |
| 714 | 0 | 0 | 0 | 0 | 1 | 3425 | 47,5 | 111 | 74 | 85  | 98  | 67  |    | 6,5  |
| 715 | 0 | 0 | 0 | 0 | 0 | 3105 | 50   | 105 | 75 | 83  | 77  | 68  |    | 5,2  |
| 716 | 0 | 0 | 0 | 0 | 0 | 3560 | 57,5 | 128 | 85 | 95  | 85  | 74  |    | 6,3  |
| 717 | 0 | 0 | 0 | 0 | 1 | 3560 | 60   | 132 | 81 | 95  | 99  | 74  | 42 | 7,3  |
| 718 | 0 | 0 | 0 | 0 | 1 | 3560 | 60   | 131 | 74 | 89  | 89  | 93  | 52 | 8,2  |
| 719 | 0 | 0 | 0 | 0 | 1 | 3380 | 67,5 | 113 | 75 | 85  | 93  | 59  |    | 5,5  |
| 720 | 0 | 0 | 0 | 0 | 0 | 3700 | 70   | 109 | 77 | 86  | 114 | 89  |    | 10,1 |
| 721 | 0 | 0 | 0 | 0 | 0 | 3380 | 70   | 108 | 71 | 81  | 106 | 69  |    | 7,4  |
| 722 | 0 | 0 | 0 | 0 | 0 | 3560 | 70   | 114 | 80 | 89  | 100 | 75  |    | 7,5  |
| 723 | 0 | 0 | 0 | 0 | 1 | 3750 | 75   | 114 | 75 | 84  | 112 | 82  |    | 9,2  |
| 724 | 0 | 0 | 0 | 0 | 0 | 3165 | 77,5 | 110 | 71 | 79  | 95  | 75  |    | 7,1  |
| 725 | 0 | 0 | 0 | 0 | 0 | 3840 | 80   | 128 | 92 | 103 | 139 | 45  |    | 6,2  |

|     |   |   |   |   |   |      |      |     |    |    |     |     |    |     |
|-----|---|---|---|---|---|------|------|-----|----|----|-----|-----|----|-----|
| 726 | 0 | 0 | 0 | 0 | 0 | 4000 | 80   | 90  | 60 | 69 | 105 | 48  |    | 5   |
| 727 | 0 | 0 | 2 | 0 | 1 | 3375 | 80   | 132 | 75 | 86 | 107 | 80  |    | 8,5 |
| 728 | 0 | 0 | 1 | 0 | 0 | 3665 | 87,5 | 116 | 80 | 89 | 107 | 55  |    | 5,9 |
| 729 | 0 | 0 | 0 | 0 | 0 | 4140 | 87,5 | 103 | 77 | 85 | 78  | 94  |    | 7,3 |
| 730 | 0 | 0 | 0 | 0 | 1 | 4085 | 90   | 102 | 68 | 77 | 87  | 86  |    | 7,5 |
| 731 | 0 | 0 | 0 | 0 | 0 | 3995 | 95   | 113 | 83 | 93 | 82  | 81  |    | 6,7 |
| 732 | 0 | 0 | 0 | 0 | 1 | 3375 | 70   | 124 | 80 | 91 | 77  | 70  |    | 5,4 |
| 733 | 0 | 0 | 0 | 0 | 0 | 3155 | 32,5 | 98  | 55 | 67 | 104 | 82  | 48 | 8,4 |
| 734 | 0 | 0 | 0 | 0 | 0 | 3155 | 32,5 | 115 | 74 | 85 | 103 | 68  | 41 | 7   |
| 735 | 0 | 0 | 0 | 0 | 0 | 4050 | 75   | 122 | 71 | 83 | 87  | 86  | 49 | 7,5 |
| 736 | 0 | 0 | 0 | 0 | 0 | 4050 | 75   | 117 | 77 | 88 | 93  | 89  | 51 | 8,3 |
| 737 | 0 | 0 | 0 | 0 | 1 | 2715 | 32,5 | 121 | 81 | 91 | 87  | 58  |    | 5,1 |
| 738 | 0 | 0 | 0 | 0 | 1 | 2985 | 17,5 | 103 | 69 | 78 | 86  | 73  | 45 | 6,3 |
| 739 | 0 | 0 | 0 | 0 | 1 | 3300 | 45   | 119 | 82 | 92 | 97  | 72  | 43 | 7   |
| 740 | 0 | 0 | 0 | 0 | 1 | 3300 | 45   | 127 | 79 | 92 | 93  | 67  | 41 | 6,2 |
| 741 | 0 | 0 | 0 | 0 | 1 | 2980 | 60   | 123 | 87 | 97 | 102 | 55  |    | 5,6 |
| 742 | 0 | 0 | 0 | 0 | 1 | 3340 | 37,5 | 122 | 83 | 93 | 93  | 98  | 52 | 9,1 |
| 743 | 0 | 0 | 0 | 0 | 1 | 3340 | 37,5 | 117 | 83 | 93 | 100 | 87  | 47 | 8,6 |
| 744 | 0 | 0 | 0 | 0 | 1 | 3935 | 87,5 | 103 | 75 | 83 | 104 | 90  |    | 9,3 |
| 745 | 0 | 0 | 0 | 0 | 1 | 3780 | 80   | 153 | 80 | 96 | 94  | 102 |    | 9,5 |
| 746 | 0 | 0 | 0 | 0 | 0 | 3985 | 72,5 | 152 | 83 | 94 | 90  | 78  |    | 7   |
| 747 | 0 | 0 | 0 | 0 | 0 | 3635 | 77,5 | 107 | 67 | 77 | 80  | 110 | 59 | 8,8 |
| 748 | 0 | 0 | 0 | 0 | 0 | 3635 | 77,5 | 116 | 66 | 78 | 90  | 100 | 54 | 9   |
| 749 | 0 | 0 | 0 | 0 | 0 | 3710 | 82,5 | 93  | 58 | 69 | 95  | 89  | 55 | 8,4 |
| 750 | 0 | 0 | 0 | 0 | 0 | 3710 | 82,5 | 92  | 65 | 72 | 114 | 70  | 44 | 8,1 |
| 751 | 0 | 0 | 0 | 0 | 1 | 2860 | 22,5 | 116 | 72 | 83 | 113 | 53  |    | 5,9 |
| 752 | 0 | 0 | 0 | 0 | 0 | 3600 | 60   | 103 | 71 | 80 | 83  | 71  |    | 5,9 |
| 753 | 0 | 0 | 0 | 0 | 0 | 4670 | 97,5 | 118 | 86 | 91 | 108 | 68  |    | 7,4 |
| 754 | 0 | 0 | 0 | 0 | 1 | 3145 | 47,5 | 121 | 83 | 92 | 127 | 65  |    | 8,3 |
| 755 | 0 | 0 | 0 | 0 | 0 | 3995 | 80   | 142 | 83 | 96 | 97  | 102 |    | 9,9 |
| 756 | 0 | 0 | 0 | 0 | 1 | 3275 | 42,5 | 115 | 76 | 86 | 105 | 68  | 39 | 7,1 |
| 757 | 0 | 0 | 0 | 0 | 1 | 3275 | 42,5 | 103 | 67 | 77 | 110 | 58  | 34 | 6,3 |
| 758 | 0 | 0 | 0 | 0 | 0 | 3430 | 45   | 134 | 87 | 99 | 100 | 73  | 41 | 7,3 |

|     |   |   |   |   |   |      |      |     |    |     |     |     |    |      |
|-----|---|---|---|---|---|------|------|-----|----|-----|-----|-----|----|------|
| 759 | 0 | 0 | 0 | 0 | 0 | 3430 | 45   | 118 | 82 | 92  | 103 | 65  | 36 | 6,7  |
| 760 | 0 | 0 | 0 | 0 | 0 | 3310 | 62,5 | 124 | 73 | 85  | 82  | 101 | 52 | 8,3  |
| 761 | 0 | 0 | 0 | 0 | 0 | 3310 | 62,5 | 103 | 67 | 75  | 86  | 107 | 51 | 9,2  |
| 762 | 0 | 0 | 0 | 0 | 1 | 2825 | 45   | 106 | 72 | 81  | 82  | 102 | 57 | 8,4  |
| 763 | 0 | 0 | 0 | 0 | 1 | 2825 | 45   | 107 | 68 | 80  | 77  | 96  | 54 | 7,4  |
| 764 | 0 | 0 | 0 | 0 | 0 | 3440 | 45   | 109 | 75 | 82  | 100 | 71  | 41 | 7,1  |
| 765 | 0 | 0 | 0 | 0 | 0 | 3440 | 45   | 103 | 67 | 76  | 86  | 97  | 54 | 8,3  |
| 766 | 0 | 0 | 0 | 0 | 0 | 3895 | 85   | 111 | 79 | 88  | 132 | 65  | 34 | 8,5  |
| 767 | 0 | 0 | 0 | 0 | 0 | 3895 | 85   | 126 | 74 | 89  | 114 | 57  | 30 | 6,5  |
| 768 | 0 | 0 | 0 | 0 | 0 | 3950 | 97,5 | 124 | 80 | 90  | 112 | 91  | 41 | 10,2 |
| 769 | 0 | 0 | 0 | 0 | 0 | 3950 | 97,5 | 117 | 92 | 98  | 122 | 75  | 34 | 9,2  |
| 770 | 0 | 0 | 0 | 0 | 1 | 3450 | 75   | 105 | 75 | 83  | 97  | 72  | 42 | 7    |
| 771 | 0 | 0 | 0 | 0 | 1 | 3450 | 75   | 113 | 72 | 82  | 93  | 74  | 44 | 6,9  |
| 772 | 0 | 0 | 0 | 0 | 1 | 3145 | 27,5 | 108 | 73 | 83  | 112 | 70  | 46 | 7,9  |
| 773 | 0 | 0 | 0 | 0 | 1 | 3145 | 27,5 | 105 | 67 | 76  | 125 | 72  | 45 | 8,9  |
| 774 | 0 | 0 | 0 | 0 | 0 | 3880 | 72,5 | 116 | 65 | 77  | 104 | 66  | 42 | 6,9  |
| 775 | 0 | 0 | 0 | 0 | 0 | 3880 | 72,5 | 105 | 72 | 82  | 107 | 56  | 37 | 6    |
| 776 | 0 | 0 | 0 | 0 | 0 | 3240 | 25   | 109 | 78 | 88  | 109 | 52  |    | 5,7  |
| 777 | 0 | 0 | 0 | 0 | 1 | 3405 | 42,5 | 131 | 81 | 94  | 101 | 71  |    | 7,1  |
| 778 | 0 | 0 | 0 | 0 | 0 | 2875 | 20   | 107 | 73 | 82  | 90  | 63  |    | 5,7  |
| 779 | 0 | 0 | 0 | 0 | 1 | 3180 | 22,5 | 135 | 82 | 92  | 97  | 159 | 75 | 15,5 |
| 780 | 0 | 0 | 0 | 0 | 1 | 3180 | 22,5 | 117 | 81 | 87  | 100 | 118 | 56 | 11,8 |
| 781 | 0 | 0 | 0 | 0 | 1 | 3215 | 25   | 119 | 76 | 87  | 99  | 75  | 41 | 7,4  |
| 782 | 0 | 0 | 0 | 0 | 1 | 3215 | 25   | 113 | 76 | 86  | 106 | 74  | 40 | 7,9  |
| 783 | 0 | 0 | 0 | 0 | 1 | 3220 | 37,5 | 124 | 82 | 93  | 115 | 62  | 37 | 7,1  |
| 784 | 0 | 0 | 0 | 0 | 1 | 3220 | 37,5 | 122 | 75 | 86  | 87  | 85  | 52 | 7,4  |
| 785 | 0 | 0 | 0 | 0 | 1 | 3220 | 37,5 | 116 | 75 | 85  | 96  | 79  | 48 | 7,6  |
| 786 | 0 | 0 | 2 | 0 | 0 | 3050 | 45   | 103 | 65 | 74  | 89  | 85  | 51 | 7,6  |
| 787 | 0 | 0 | 2 | 0 | 0 | 3050 | 45   | 110 | 69 | 78  | 90  | 75  | 46 | 6,7  |
| 788 | 0 | 0 | 0 | 0 | 1 | 3145 | 45   | 136 | 93 | 104 | 91  | 116 |    | 10,5 |
| 789 | 0 | 0 | 0 | 0 | 0 | 3630 | 62,5 | 118 | 80 | 89  | 116 | 73  | 41 | 8,4  |
| 790 | 0 | 0 | 0 | 0 | 0 | 3630 | 62,5 | 106 | 80 | 88  | 104 | 64  | 37 | 6,7  |
| 791 | 0 | 0 | 0 | 0 | 0 | 3380 | 70   | 118 | 71 | 82  | 90  | 86  | 48 | 7,7  |

|     |   |   |   |   |   |      |      |     |    |     |     |     |    |     |
|-----|---|---|---|---|---|------|------|-----|----|-----|-----|-----|----|-----|
| 792 | 0 | 0 | 0 | 0 | 0 | 3380 | 70   | 106 | 68 | 78  | 90  | 78  | 45 | 7   |
| 793 | 0 | 0 | 0 | 0 | 0 | 3960 | 70   | 119 | 83 | 89  | 101 | 78  |    | 7,9 |
| 794 | 0 | 0 | 0 | 0 | 0 | 3430 | 72,5 | 116 | 74 | 84  | 81  | 78  | 46 | 6,3 |
| 795 | 0 | 0 | 0 | 0 | 0 | 3430 | 72,5 | 113 | 77 | 87  | 79  | 73  | 44 | 5,8 |
| 796 | 0 | 0 | 0 | 0 | 0 | 3635 | 77,5 | 121 | 85 | 94  | 91  | 72  | 46 | 6,6 |
| 797 | 0 | 0 | 0 | 0 | 0 | 3635 | 77,5 | 125 | 95 | 103 | 114 | 46  | 30 | 5,2 |
| 798 | 0 | 0 | 0 | 0 | 1 | 4000 | 90   | 107 | 66 | 75  | 88  | 93  | 48 | 8,2 |
| 799 | 0 | 0 | 0 | 0 | 1 | 4000 | 90   | 111 | 75 | 84  | 98  | 74  | 38 | 7,3 |
| 800 | 0 | 0 | 0 | 0 | 0 | 4735 | 97,5 | 106 | 71 | 79  | 100 | 92  | 49 | 9,2 |
| 801 | 0 | 0 | 0 | 0 | 0 | 4735 | 97,5 | 100 | 69 | 78  | 88  | 87  | 48 | 7,7 |
| 802 | 0 | 0 | 0 | 0 | 1 | 2775 | 15   | 115 | 77 | 87  | 86  | 75  | 44 | 6,4 |
| 803 | 0 | 0 | 0 | 0 | 1 | 2775 | 15   | 101 | 72 | 81  | 84  | 74  | 45 | 6,2 |
| 804 | 0 | 0 | 0 | 0 | 1 | 3330 | 67,5 | 97  | 63 | 73  | 100 | 82  | 49 | 8,2 |
| 805 | 0 | 0 | 0 | 0 | 1 | 3330 | 67,5 | 116 | 67 | 79  | 91  | 76  | 47 | 7   |
| 806 | 0 | 0 | 0 | 0 | 0 | 3475 | 37,5 | 114 | 73 | 82  | 102 | 87  | 44 | 8,8 |
| 807 | 0 | 0 | 0 | 0 | 0 | 3475 | 37,5 | 126 | 75 | 88  | 89  | 103 | 53 | 9,2 |
| 808 | 0 | 0 | 1 | 0 | 1 | 3015 | 30   | 108 | 77 | 87  | 109 | 60  |    | 6,5 |
| 809 | 0 | 0 | 1 | 0 | 1 | 3845 | 87,5 | 133 | 78 | 90  | 110 | 65  | 40 | 7,1 |
| 810 | 0 | 0 | 1 | 0 | 1 | 3845 | 87,5 | 123 | 81 | 91  | 134 | 48  | 31 | 6,4 |
| 811 | 0 | 0 | 0 | 0 | 0 | 4025 | 82,5 | 114 | 74 | 86  | 92  | 87  | 51 | 8   |
| 812 | 0 | 0 | 0 | 0 | 0 | 4025 | 82,5 | 122 | 78 | 90  | 91  | 74  | 45 | 6,8 |
| 813 | 0 | 0 | 2 | 0 | 1 | 3515 | 65   | 127 | 84 | 96  | 87  | 77  |    | 6,7 |
| 814 | 0 | 0 | 0 | 0 | 1 | 3650 | 87,5 | 111 | 75 | 85  | 86  | 92  | 49 | 8   |
| 815 | 0 | 0 | 0 | 0 | 1 | 3650 | 87,5 | 123 | 75 | 88  | 99  | 97  | 51 | 9,6 |
| 816 | 0 | 0 | 0 | 0 | 0 | 3075 | 22,5 | 115 | 73 | 83  | 97  | 61  | 39 | 5,9 |
| 817 | 0 | 0 | 0 | 0 | 1 | 3285 | 45   | 109 | 86 | 91  | 85  | 93  | 54 | 7,9 |
| 818 | 0 | 0 | 0 | 0 | 1 | 3285 | 45   | 127 | 82 | 95  | 78  | 83  | 50 | 6,4 |
| 819 | 0 | 0 | 0 | 0 | 0 | 3580 | 75   | 119 | 77 | 86  | 106 | 64  | 40 | 6,8 |
| 820 | 0 | 0 | 0 | 0 | 1 | 3200 | 35   | 106 | 67 | 78  | 80  | 82  | 48 | 6,6 |
| 821 | 0 | 0 | 0 | 0 | 1 | 3200 | 35   | 102 | 67 | 77  | 86  | 68  | 41 | 5,9 |
| 822 | 0 | 0 | 0 | 0 | 0 | 3970 | 92,5 | 143 | 89 | 106 | 136 | 69  |    | 9,3 |
| 823 | 0 | 0 | 0 | 0 | 0 | 3550 | 70   | 121 | 62 | 80  | 72  | 100 |    | 7,2 |
| 824 | 0 | 0 | 0 | 0 | 1 | 3185 | 15   | 103 | 72 | 81  | 114 | 68  | 40 | 7,8 |

|     |   |   |   |   |   |      |      |     |    |     |     |     |    |     |
|-----|---|---|---|---|---|------|------|-----|----|-----|-----|-----|----|-----|
| 825 | 0 | 0 | 0 | 0 | 1 | 3795 | 72,5 | 124 | 82 | 91  | 91  | 90  | 48 | 8,2 |
| 826 | 0 | 0 | 0 | 0 | 1 | 3795 | 72,5 | 121 | 78 | 89  | 83  | 96  | 55 | 7,9 |
| 827 | 0 | 0 | 0 | 0 | 1 | 3795 | 72,5 | 111 | 83 | 91  | 92  | 72  | 42 | 6,7 |
| 828 | 0 | 0 | 0 | 0 | 1 | 3595 | 72,5 | 113 | 80 | 90  | 83  | 89  |    | 7,4 |
| 829 | 0 | 0 | 0 | 0 | 0 | 3185 | 37,5 | 111 | 74 | 84  | 103 | 51  | 32 | 5,3 |
| 830 | 0 | 0 | 0 | 0 | 1 | 3335 | 80   | 119 | 83 | 93  | 111 | 55  |    | 6   |
| 831 | 0 | 0 | 0 | 0 | 0 | 3815 | 57,5 | 102 | 69 | 78  | 83  | 74  | 42 | 6,1 |
| 832 | 0 | 0 | 0 | 0 | 0 | 3815 | 57,5 | 114 | 68 | 78  | 91  | 75  | 43 | 6,8 |
| 833 | 0 | 0 | 0 | 0 | 0 | 3785 | 77,5 | 109 | 66 | 76  | 82  | 83  | 54 | 6,8 |
| 834 | 0 | 0 | 0 | 0 | 0 | 3785 | 77,5 | 109 | 71 | 80  | 85  | 70  | 47 | 6   |
| 835 | 0 | 0 | 0 | 0 | 0 | 3530 | 55   | 115 | 75 | 84  | 96  | 48  |    | 4,6 |
| 836 | 0 | 0 | 0 | 0 | 0 | 3620 | 50   | 139 | 80 | 97  | 109 | 91  |    | 9,9 |
| 837 | 0 | 0 | 0 | 0 | 1 | 3015 | 12,5 | 98  | 67 | 76  | 99  | 66  | 39 | 6,6 |
| 838 | 0 | 0 | 0 | 0 | 1 | 3015 | 12,5 | 111 | 74 | 84  | 95  | 65  | 40 | 6,2 |
| 839 | 0 | 0 | 0 | 0 | 0 | 3990 | 72,5 | 110 | 72 | 82  | 96  | 80  | 44 | 7,7 |
| 840 | 0 | 0 | 0 | 0 | 0 | 3990 | 72,5 | 107 | 77 | 86  | 114 | 71  | 39 | 8,2 |
| 841 | 0 | 0 | 0 | 0 | 0 | 3240 | 72,5 | 124 | 78 | 88  | 91  | 77  | 42 | 7,1 |
| 842 | 0 | 0 | 0 | 0 | 0 | 3240 | 72,5 | 124 | 80 | 90  | 78  | 80  | 43 | 6,2 |
| 843 | 0 | 0 | 0 | 0 | 1 | 4130 | 92,5 | 124 | 81 | 91  | 109 | 71  | 37 | 7,8 |
| 844 | 0 | 0 | 0 | 0 | 1 | 4130 | 92,5 | 113 | 85 | 94  | 94  | 94  | 48 | 8,9 |
| 845 | 0 | 0 | 1 | 0 | 0 | 3455 | 27,5 | 134 | 81 | 94  | 90  | 102 | 51 | 9,2 |
| 846 | 0 | 0 | 1 | 0 | 0 | 3455 | 27,5 | 141 | 85 | 98  | 79  | 104 | 52 | 8,2 |
| 847 | 0 | 0 | 0 | 0 | 1 | 3380 | 70   | 109 | 66 | 76  | 96  | 83  | 44 | 7,9 |
| 848 | 0 | 0 | 0 | 0 | 1 | 3380 | 70   | 94  | 60 | 64  | 78  | 113 | 58 | 8,8 |
| 849 | 0 | 0 | 0 | 0 | 1 | 3120 | 40   | 113 | 85 | 94  | 98  | 57  | 33 | 5,6 |
| 850 | 0 | 0 | 0 | 0 | 1 | 3120 | 40   | 107 | 78 | 86  | 91  | 71  | 41 | 6,5 |
| 851 | 0 | 0 | 0 | 0 | 0 | 3285 | 60   | 117 | 80 | 91  | 96  | 76  | 46 | 7,3 |
| 852 | 0 | 0 | 0 | 0 | 0 | 3285 | 60   | 123 | 91 | 101 | 97  | 68  | 42 | 6,6 |
| 853 | 0 | 0 | 0 | 0 | 0 | 4170 | 90   | 105 | 69 | 78  | 86  | 79  |    | 6,8 |
| 854 | 0 | 0 | 0 | 0 | 1 | 3260 | 60   | 110 | 81 | 89  | 97  | 76  | 40 | 7,4 |
| 855 | 0 | 0 | 0 | 0 | 1 | 3260 | 60   | 108 | 78 | 87  | 87  | 103 | 53 | 8,9 |
| 856 | 0 | 0 | 0 | 0 | 1 | 3190 | 35   | 144 | 88 | 101 | 101 | 74  |    | 7,4 |
| 857 | 0 | 0 | 0 | 0 | 1 | 3035 | 22,5 | 135 | 85 | 95  | 113 | 62  | 40 | 7   |



|     |   |   |   |   |   |      |      |     |    |     |     |     |    |      |
|-----|---|---|---|---|---|------|------|-----|----|-----|-----|-----|----|------|
| 858 | 0 | 0 | 0 | 0 | 1 | 3035 | 22,5 | 114 | 79 | 88  | 101 | 63  | 42 | 6,4  |
| 859 | 0 | 0 | 0 | 0 | 1 | 4030 | 87,5 | 105 | 73 | 82  | 116 | 55  | 34 | 6,4  |
| 860 | 0 | 0 | 0 | 0 | 1 | 4030 | 87,5 | 97  | 71 | 79  | 121 | 51  | 30 | 6,2  |
| 861 | 0 | 0 | 0 | 0 | 0 | 3505 | 40   | 146 | 89 | 104 | 117 | 76  | 38 | 8,8  |
| 862 | 0 | 0 | 0 | 0 | 0 | 3505 | 40   | 153 | 93 | 106 | 108 | 92  | 45 | 9,9  |
| 863 | 0 | 0 | 0 | 0 | 0 | 3505 | 40   | 139 | 82 | 100 | 97  | 84  | 42 | 8,2  |
| 864 | 0 | 0 | 3 | 0 | 0 | 3730 | 90   | 84  | 47 | 56  | 71  | 103 | 56 | 7,3  |
| 865 | 0 | 0 | 3 | 0 | 0 | 3730 | 90   | 88  | 56 | 64  | 88  | 78  | 43 | 6,8  |
| 866 | 0 | 0 | 0 | 0 | 0 | 4170 | 90   | 115 | 66 | 78  | 96  | 123 | 53 | 11,9 |
| 867 | 0 | 0 | 0 | 0 | 0 | 4170 | 90   | 123 | 73 | 82  | 94  | 134 | 57 | 12,6 |
| 868 | 0 | 0 | 0 | 0 | 1 | 3595 | 75   | 99  | 66 | 75  | 89  | 95  | 54 | 8,4  |
| 869 | 0 | 0 | 0 | 0 | 1 | 3595 | 75   | 99  | 66 | 75  | 89  | 95  | 54 | 8,4  |
| 870 | 0 | 0 | 0 | 0 | 0 | 4675 | 97,5 | 124 | 69 | 83  | 93  | 75  | 45 | 7    |
| 871 | 0 | 0 | 0 | 0 | 0 | 4675 | 97,5 | 98  | 63 | 72  | 95  | 58  | 36 | 5,4  |
| 872 | 0 | 0 | 0 | 0 | 1 | 3455 | 75   | 114 | 76 | 86  | 105 | 67  | 35 | 7,1  |
| 873 | 0 | 0 | 0 | 0 | 1 | 3455 | 75   | 124 | 79 | 88  | 106 | 61  | 32 | 6,5  |
| 874 | 0 | 0 | 0 | 0 | 1 | 2870 | 27,5 | 97  | 67 | 76  | 105 | 76  | 46 | 8    |
| 875 | 0 | 0 | 0 | 0 | 1 | 2870 | 27,5 | 105 | 73 | 82  | 99  | 74  | 45 | 7,3  |
| 876 | 0 | 0 | 0 | 0 | 1 | 3145 | 20   | 111 | 71 | 81  | 105 | 65  |    | 6,8  |
| 877 | 0 | 0 | 0 | 0 | 0 | 3400 | 55   | 93  | 66 | 75  | 80  | 92  | 52 | 7,3  |
| 878 | 0 | 0 | 0 | 0 | 0 | 3400 | 55   | 102 | 66 | 76  | 90  | 60  | 34 | 5,4  |
| 879 | 0 | 0 | 0 | 0 | 0 | 3310 | 45   | 133 | 89 | 99  | 97  | 68  | 37 | 6,7  |
| 880 | 0 | 0 | 0 | 0 | 0 | 3310 | 45   | 121 | 88 | 97  | 91  | 76  | 41 | 6,9  |
| 881 | 0 | 0 | 1 | 0 | 0 | 4070 | 82,5 | 124 | 91 | 100 | 80  | 96  | 43 | 7,8  |
| 882 | 0 | 0 | 1 | 0 | 0 | 4070 | 82,5 | 138 | 90 | 106 | 91  | 89  | 40 | 8,1  |
| 883 | 0 | 0 | 0 | 0 | 0 | 4210 | 85   | 97  | 71 | 79  | 98  | 68  | 36 | 6,6  |
| 884 | 0 | 0 | 0 | 0 | 0 | 4210 | 85   | 116 | 67 | 81  | 92  | 77  | 41 | 7    |
| 885 | 0 | 0 | 0 | 0 | 0 | 3650 | 65   | 101 | 69 | 78  | 77  | 99  | 55 | 7,6  |
| 886 | 0 | 0 | 0 | 0 | 0 | 3650 | 65   | 99  | 70 | 79  | 92  | 79  | 45 | 7,2  |
| 887 | 0 | 0 | 0 | 0 | 0 | 3580 | 72,5 | 102 | 77 | 85  | 117 | 56  |    | 6,6  |
| 888 | 0 | 0 | 0 | 0 | 0 | 3920 | 65   | 108 | 66 | 76  | 75  | 118 | 67 | 8,8  |
| 889 | 0 | 0 | 0 | 0 | 0 | 3920 | 65   | 99  | 67 | 77  | 83  | 88  | 51 | 7,3  |
| 890 | 0 | 0 | 1 | 0 | 0 | 3805 | 77,5 | 105 | 62 | 70  | 105 | 77  | 43 | 8    |

|     |   |   |   |   |   |      |      |     |    |     |     |     |    |      |
|-----|---|---|---|---|---|------|------|-----|----|-----|-----|-----|----|------|
| 891 | 0 | 0 | 0 | 0 | 0 | 3680 | 67,5 | 121 | 75 | 88  | 93  | 123 | 55 | 11,5 |
| 892 | 0 | 0 | 0 | 0 | 0 | 3680 | 67,5 | 117 | 75 | 86  | 88  | 108 | 49 | 9,5  |
| 893 | 0 | 0 | 0 | 0 | 0 | 3125 | 27,5 | 122 | 82 | 93  | 109 | 56  |    | 6,1  |
| 894 | 0 | 0 | 0 | 0 | 1 | 3975 | 97,5 | 124 | 89 | 99  | 117 | 71  | 33 | 8,3  |
| 895 | 0 | 0 | 0 | 0 | 1 | 3975 | 97,5 | 115 | 85 | 94  | 97  | 78  | 36 | 7,6  |
| 896 | 0 | 0 | 1 | 0 | 0 | 4435 | 97,5 | 118 | 77 | 88  | 81  | 81  |    | 6,5  |
| 897 | 0 | 0 | 0 | 0 | 1 | 3020 | 20   | 102 | 66 | 76  | 99  | 77  | 44 | 7,6  |
| 898 | 0 | 0 | 0 | 0 | 1 | 3020 | 20   | 91  | 63 | 70  | 102 | 75  | 42 | 7,7  |
| 899 | 0 | 0 | 0 | 0 | 0 | 2830 | 32,5 | 100 | 74 | 82  | 100 | 63  | 40 | 6,3  |
| 900 | 0 | 0 | 0 | 0 | 0 | 2830 | 32,5 | 105 | 76 | 84  | 89  | 50  | 33 | 4,4  |
| 901 | 0 | 0 | 0 | 0 | 1 | 3275 | 32,5 | 121 | 77 | 87  | 82  | 66  |    | 5,4  |
| 902 | 0 | 0 | 0 | 0 | 0 | 3425 | 57,5 | 121 | 74 | 82  | 103 | 58  | 35 | 6,1  |
| 903 | 0 | 0 | 0 | 0 | 0 | 3425 | 57,5 | 130 | 82 | 94  | 99  | 80  | 47 | 7,9  |
| 904 | 0 | 0 | 0 | 0 | 0 | 4095 | 80   | 110 | 76 | 86  | 94  | 80  |    | 7,5  |
| 905 | 0 | 0 | 0 | 0 | 1 | 3705 | 90   | 102 | 73 | 81  | 112 | 70  | 37 | 7,8  |
| 906 | 0 | 0 | 0 | 0 | 1 | 3705 | 90   | 114 | 67 | 78  | 97  | 109 | 56 | 10,5 |
| 907 | 0 | 0 | 0 | 0 | 0 | 3780 | 77,5 | 96  | 65 | 73  | 100 | 74  | 44 | 7,5  |
| 908 | 0 | 0 | 0 | 0 | 0 | 3780 | 77,5 | 103 | 72 | 80  | 123 | 58  | 35 | 7,1  |
| 909 | 0 | 0 | 0 | 0 | 1 | 4070 | 92,5 | 142 | 91 | 102 | 87  | 106 |    | 9,3  |
| 910 | 0 | 0 | 0 | 0 | 1 | 2450 | 42,5 | 124 | 78 | 89  | 86  | 83  |    | 7,1  |
| 911 | 0 | 0 | 0 | 0 | 1 | 3485 | 50   | 106 | 79 | 87  | 91  | 79  |    | 7,2  |
| 912 | 0 | 0 | 0 | 0 | 1 | 3790 | 77,5 | 113 | 74 | 85  | 102 | 73  |    | 7,4  |
| 913 | 0 | 0 | 0 | 0 | 1 | 3430 | 72,5 | 111 | 71 | 83  | 79  | 106 | 57 | 8,4  |
| 914 | 0 | 0 | 0 | 0 | 1 | 3430 | 72,5 | 113 | 75 | 85  | 82  | 80  | 45 | 6,6  |
| 915 | 0 | 0 | 2 | 0 | 0 | 3070 | 12,5 | 119 | 78 | 89  | 98  | 85  | 42 | 8,2  |
| 916 | 0 | 0 | 2 | 0 | 0 | 3070 | 12,5 | 122 | 83 | 93  | 93  | 76  | 38 | 7    |
| 917 | 0 | 0 | 0 | 0 | 1 | 3390 | 32,5 | 123 | 75 | 87  | 107 | 50  |    | 5,4  |
| 918 | 0 | 0 | 0 | 0 | 0 | 3010 | 40   | 146 | 95 | 106 | 124 | 66  | 34 | 8,2  |
| 919 | 0 | 0 | 0 | 0 | 0 | 3010 | 40   | 129 | 88 | 97  | 121 | 68  | 37 | 8,3  |
| 920 | 0 | 0 | 0 | 0 | 1 | 3275 | 32,5 | 124 | 75 | 86  | 118 | 69  |    | 8,1  |
| 921 | 0 | 0 | 0 | 0 | 1 | 3770 | 92,5 | 106 | 68 | 80  | 90  | 88  |    | 7,8  |
| 922 | 0 | 0 | 0 | 0 | 0 | 3250 | 27,5 | 119 | 77 | 89  | 95  | 51  | 36 | 4,8  |
| 923 | 0 | 0 | 0 | 0 | 0 | 3250 | 27,5 | 109 | 78 | 87  | 96  | 48  | 33 | 4,6  |

|     |   |   |   |   |   |      |      |     |    |    |     |     |    |      |
|-----|---|---|---|---|---|------|------|-----|----|----|-----|-----|----|------|
| 924 | 0 | 0 | 1 | 0 | 0 | 3395 | 40   | 113 | 72 | 81 | 104 | 87  |    | 9    |
| 925 | 0 | 0 | 0 | 0 | 1 | 3125 | 45   | 111 | 72 | 81 | 95  | 83  | 46 | 7,9  |
| 926 | 0 | 0 | 0 | 0 | 1 | 3125 | 45   | 128 | 86 | 97 | 99  | 62  | 35 | 6,1  |
| 927 | 0 | 0 | 0 | 0 | 1 | 3070 | 25   | 108 | 63 | 72 | 85  | 84  | 49 | 7,1  |
| 928 | 0 | 0 | 0 | 0 | 1 | 3070 | 25   | 131 | 74 | 82 | 84  | 71  | 43 | 6    |
| 929 | 0 | 0 | 0 | 0 | 1 | 2985 | 12,5 | 107 | 62 | 73 | 71  | 92  | 54 | 6,5  |
| 930 | 0 | 0 | 0 | 0 | 1 | 2985 | 12,5 | 131 | 75 | 88 | 69  | 94  | 56 | 6,4  |
| 931 | 0 | 0 | 1 | 0 | 1 | 2875 | 22,5 | 108 | 71 | 79 | 86  | 82  | 47 | 7,1  |
| 932 | 0 | 0 | 0 | 0 | 0 | 4270 | 97,5 | 117 | 76 | 86 | 103 | 84  | 42 | 8,7  |
| 933 | 0 | 0 | 0 | 0 | 0 | 4270 | 97,5 | 136 | 85 | 95 | 102 | 70  | 36 | 7,2  |
| 934 | 0 | 0 | 0 | 0 | 1 | 3420 | 57,5 | 122 | 85 | 94 | 96  | 65  | 36 | 6,2  |
| 935 | 0 | 0 | 0 | 0 | 1 | 3420 | 57,5 | 116 | 76 | 87 | 89  | 87  | 48 | 7,8  |
| 936 | 0 | 0 | 0 | 0 | 0 | 3785 | 77,5 | 115 | 79 | 88 | 125 | 80  | 37 | 10   |
| 937 | 0 | 0 | 0 | 0 | 0 | 3785 | 77,5 | 109 | 66 | 75 | 104 | 96  | 45 | 10   |
| 938 | 0 | 0 | 0 | 0 | 0 | 3535 | 40   | 131 | 82 | 92 | 108 | 68  | 39 | 7,3  |
| 939 | 0 | 0 | 0 | 0 | 0 | 3535 | 40   | 131 | 82 | 94 | 86  | 80  | 46 | 6,9  |
| 940 | 0 | 0 | 0 | 0 | 1 | 3330 | 65   | 98  | 69 | 78 | 100 | 87  | 45 | 8,7  |
| 941 | 0 | 0 | 0 | 0 | 1 | 3330 | 65   | 100 | 75 | 84 | 91  | 82  | 42 | 7,5  |
| 942 | 0 | 0 | 0 | 0 | 0 | 3680 | 67,5 | 133 | 83 | 93 | 119 | 90  | 45 | 10,7 |
| 943 | 0 | 0 | 0 | 0 | 0 | 3680 | 67,5 | 126 | 76 | 87 | 104 | 82  | 42 | 8,5  |
| 944 | 0 | 0 | 0 | 0 | 1 | 3480 | 52,5 | 116 | 77 | 85 | 78  | 76  |    | 6    |
| 945 | 0 | 0 | 0 | 0 | 0 | 3385 | 70   | 114 | 73 | 83 | 104 | 79  | 46 | 8,2  |
| 946 | 0 | 0 | 0 | 0 | 0 | 3385 | 70   | 119 | 83 | 93 | 113 | 66  | 39 | 7,4  |
| 947 | 0 | 0 | 0 | 0 | 1 | 2880 | 27,5 | 119 | 75 | 86 | 93  | 78  | 45 | 7,2  |
| 948 | 0 | 0 | 0 | 0 | 0 | 3640 | 77,5 | 113 | 78 | 87 | 104 | 96  | 47 | 9,9  |
| 949 | 0 | 0 | 0 | 0 | 0 | 3640 | 77,5 | 109 | 66 | 77 | 100 | 91  | 46 | 9,1  |
| 950 | 0 | 0 | 2 | 0 | 1 | 3755 | 85   | 109 | 73 | 82 | 104 | 105 | 53 | 10,9 |
| 951 | 0 | 0 | 2 | 0 | 1 | 3755 | 85   | 124 | 78 | 89 | 123 | 75  | 39 | 9,3  |
| 952 | 0 | 0 | 0 | 0 | 1 | 3910 | 87,5 | 121 | 72 | 86 | 98  | 76  |    | 7,5  |
| 953 | 0 | 0 | 0 | 0 | 1 | 4140 | 92,5 | 141 | 81 | 90 | 98  | 77  | 42 | 7,5  |
| 954 | 0 | 0 | 0 | 0 | 1 | 3430 | 45   | 109 | 75 | 83 | 99  | 86  | 50 | 8,5  |
| 955 | 0 | 0 | 0 | 0 | 1 | 3430 | 45   | 99  | 70 | 79 | 95  | 71  | 42 | 6,7  |
| 956 | 0 | 0 | 0 | 0 | 0 | 4160 | 95   | 115 | 75 | 86 | 88  | 127 | 65 | 11,2 |

|     |   |   |   |   |   |      |      |     |    |     |     |     |    |      |
|-----|---|---|---|---|---|------|------|-----|----|-----|-----|-----|----|------|
| 957 | 0 | 0 | 0 | 0 | 0 | 4160 | 95   | 121 | 87 | 96  | 98  | 100 | 53 | 9,8  |
| 958 | 0 | 0 | 0 | 0 | 1 | 3295 | 22,5 | 130 | 74 | 90  | 100 | 77  | 44 | 7,7  |
| 959 | 0 | 0 | 0 | 0 | 0 | 4260 | 97,5 | 121 | 74 | 86  | 101 | 97  | 52 | 9,8  |
| 960 | 0 | 0 | 0 | 0 | 0 | 4260 | 97,5 | 119 | 73 | 85  | 101 | 71  | 40 | 7,2  |
| 961 | 0 | 0 | 0 | 0 | 0 | 2995 | 50   | 115 | 81 | 89  | 116 | 60  | 31 | 6,9  |
| 962 | 0 | 0 | 0 | 0 | 0 | 2995 | 50   | 125 | 82 | 93  | 110 | 59  | 30 | 6,5  |
| 963 | 0 | 0 | 0 | 0 | 1 | 3870 | 95   | 118 | 82 | 92  | 95  | 78  | 43 | 7,3  |
| 964 | 0 | 0 | 0 | 0 | 1 | 3870 | 95   | 121 | 82 | 92  | 95  | 74  | 40 | 7    |
| 965 | 0 | 0 | 0 | 0 | 1 | 4070 | 97,5 | 102 | 72 | 79  | 111 | 69  | 38 | 7,7  |
| 966 | 0 | 0 | 0 | 0 | 1 | 4070 | 97,5 | 105 | 70 | 79  | 94  | 82  | 46 | 7,7  |
| 967 | 0 | 0 | 0 | 0 | 1 | 4070 | 97,5 | 110 | 72 | 82  | 93  | 79  | 45 | 7,3  |
| 968 | 0 | 0 | 0 | 0 | 0 | 3140 | 17,5 | 109 | 73 | 83  | 86  | 67  | 40 | 5,7  |
| 969 | 0 | 0 | 0 | 0 | 0 | 3140 | 17,5 | 111 | 72 | 81  | 90  | 73  | 44 | 6,6  |
| 970 | 0 | 0 | 1 | 0 | 1 | 3245 | 40   | 143 | 81 | 93  | 96  | 89  | 45 | 8,6  |
| 971 | 0 | 0 | 1 | 0 | 1 | 3245 | 40   | 124 | 83 | 92  | 86  | 93  | 47 | 8    |
| 972 | 0 | 0 | 0 | 0 | 1 | 3230 | 37,5 | 123 | 84 | 96  | 134 | 50  |    | 6,7  |
| 973 | 0 | 0 | 0 | 0 | 0 | 3730 | 60   | 100 | 83 | 89  | 103 | 71  |    | 7,3  |
| 974 | 0 | 0 | 0 | 0 | 0 | 2990 | 17,5 | 125 | 85 | 97  | 95  | 62  | 38 | 6    |
| 975 | 0 | 0 | 0 | 0 | 0 | 2990 | 17,5 | 133 | 82 | 94  | 94  | 77  | 45 | 7,2  |
| 976 | 0 | 0 | 0 | 0 | 1 | 3640 | 52,5 | 102 | 73 | 82  | 104 | 129 | 59 | 13,4 |
| 977 | 0 | 0 | 0 | 0 | 1 | 3640 | 52,5 | 110 | 68 | 78  | 98  | 117 | 55 | 11,4 |
| 978 | 0 | 0 | 0 | 0 | 0 | 3420 | 32,5 | 121 | 76 | 84  | 109 | 63  |    | 6,9  |
| 979 | 0 | 0 | 0 | 0 | 1 | 3500 | 55   | 110 | 80 | 87  | 104 | 60  | 38 | 6,2  |
| 980 | 0 | 0 | 0 | 0 | 1 | 3065 | 22,5 | 98  | 63 | 73  | 101 | 62  |    | 6,2  |
| 981 | 0 | 0 | 0 | 0 | 1 | 3005 | 55   | 142 | 91 | 102 | 92  | 105 | 54 | 9,7  |
| 982 | 0 | 0 | 0 | 0 | 1 | 3005 | 55   | 142 | 94 | 107 | 99  | 77  | 41 | 7,7  |
| 983 | 0 | 0 | 0 | 0 | 1 | 3055 | 22,5 | 118 | 80 | 90  | 103 | 81  | 46 | 8,3  |
| 984 | 0 | 0 | 0 | 0 | 1 | 3055 | 22,5 | 121 | 83 | 91  | 92  | 72  | 42 | 6,7  |
| 985 | 0 | 0 | 0 | 0 | 0 | 3405 | 22,5 | 116 | 76 | 86  | 87  | 117 | 64 | 10,1 |
| 986 | 0 | 0 | 0 | 0 | 0 | 3405 | 22,5 | 116 | 70 | 81  | 92  | 102 | 56 | 9,4  |
| 987 | 0 | 0 | 0 | 0 | 0 | 3600 | 47,5 | 110 | 76 | 86  | 121 | 53  | 33 | 6,4  |
| 988 | 0 | 0 | 0 | 0 | 0 | 3600 | 47,5 | 109 | 70 | 83  | 125 | 59  | 36 | 7,4  |
| 989 | 0 | 0 | 1 | 0 | 1 | 3745 | 67,5 | 123 | 81 | 91  | 84  | 102 | 60 | 8,6  |

|      |   |   |   |   |   |      |      |     |    |     |     |     |    |      |
|------|---|---|---|---|---|------|------|-----|----|-----|-----|-----|----|------|
| 990  | 0 | 0 | 1 | 0 | 1 | 3745 | 67,5 | 124 | 54 | 69  | 91  | 110 | 64 | 9,9  |
| 991  | 0 | 0 | 0 | 0 | 1 | 2275 | 30   | 123 | 80 | 89  | 92  | 84  | 46 | 7,7  |
| 992  | 0 | 0 | 0 | 0 | 1 | 2275 | 30   | 114 | 71 | 81  | 90  | 98  | 54 | 8,8  |
| 993  | 0 | 0 | 0 | 0 | 1 | 3130 | 80   | 123 | 90 | 99  | 104 | 75  | 41 | 7,8  |
| 994  | 0 | 0 | 0 | 0 | 1 | 3215 | 72,5 | 115 | 84 | 93  | 90  | 88  | 44 | 7,9  |
| 995  | 0 | 0 | 0 | 0 | 1 | 3215 | 72,5 | 133 | 89 | 98  | 105 | 71  | 35 | 7,5  |
| 996  | 0 | 0 | 0 | 0 | 1 | 3215 | 72,5 | 130 | 87 | 98  | 102 | 76  | 38 | 7,7  |
| 997  | 0 | 0 | 0 | 0 | 0 | 3515 | 40   | 119 | 81 | 91  | 104 | 84  | 44 | 8,8  |
| 998  | 0 | 0 | 0 | 0 | 0 | 3515 | 40   | 125 | 82 | 94  | 113 | 74  | 40 | 8,4  |
| 999  | 0 | 0 | 0 | 0 | 0 | 3840 | 90   | 106 | 75 | 84  | 99  | 74  |    | 7,3  |
| 1000 | 0 | 0 | 0 | 0 | 0 | 3410 | 57,5 | 110 | 69 | 79  | 90  | 59  |    | 5,3  |
| 1001 | 0 | 0 | 0 | 0 | 1 | 3400 | 70   | 110 | 71 | 82  | 90  | 95  |    | 8,5  |
| 1002 | 0 | 0 | 0 | 0 | 0 | 4495 | 95   | 133 | 94 | 103 | 117 | 110 |    | 12,9 |
| 1003 | 0 | 0 | 0 | 0 | 1 | 3810 | 87,5 | 125 | 85 | 95  | 104 | 128 | 53 | 13,2 |
| 1004 | 0 | 0 | 0 | 0 | 1 | 3810 | 87,5 | 119 | 68 | 82  | 98  | 131 | 56 | 12,8 |
| 1005 | 0 | 0 | 0 | 0 | 1 | 3810 | 87,5 | 110 | 80 | 88  | 94  | 138 | 59 | 12,9 |
| 1006 | 0 | 0 | 0 | 0 | 0 | 3670 | 80   | 119 | 72 | 82  | 89  | 139 | 62 | 12,4 |
| 1007 | 0 | 0 | 0 | 0 | 0 | 3670 | 80   | 102 | 69 | 76  | 94  | 110 | 50 | 10,4 |
| 1008 | 0 | 0 | 0 | 0 | 0 | 3670 | 80   | 110 | 78 | 86  | 100 | 135 | 63 | 13,4 |
| 1009 | 0 | 0 | 0 | 0 | 0 | 3675 | 42,5 | 117 | 76 | 86  | 108 | 86  | 46 | 9,3  |
| 1010 | 0 | 0 | 0 | 0 | 0 | 3675 | 42,5 | 128 | 82 | 93  | 105 | 95  | 50 | 10   |
| 1011 | 0 | 0 | 0 | 0 | 0 | 3915 | 75   | 132 | 80 | 90  | 90  | 105 | 51 | 9,5  |
| 1012 | 0 | 0 | 0 | 0 | 0 | 3915 | 75   | 140 | 82 | 92  | 96  | 100 | 48 | 9,6  |
| 1013 | 0 | 0 | 0 | 0 | 1 | 4035 | 95   | 108 | 72 | 82  | 76  | 110 | 61 | 8,4  |
| 1014 | 0 | 0 | 0 | 0 | 1 | 4035 | 95   | 124 | 74 | 86  | 89  | 86  | 49 | 7,6  |
| 1015 | 0 | 0 | 0 | 0 | 0 | 2490 | 37,5 | 103 | 80 | 85  | 101 | 76  |    | 7,7  |
| 1016 | 0 | 0 | 0 | 0 | 1 | 1600 | 65   | 115 | 85 | 94  | 106 | 68  | 46 | 7,2  |
| 1017 | 0 | 0 | 0 | 0 | 1 | 1600 | 65   | 113 | 78 | 88  | 115 | 59  | 41 | 6,8  |
| 1018 | 0 | 0 | 0 | 0 | 1 | 2970 | 50   | 114 | 69 | 80  | 97  | 60  |    | 5,8  |
| 1019 | 0 | 0 | 0 | 0 | 0 | 3395 | 30   | 121 | 84 | 93  | 112 | 66  | 40 | 7,4  |
| 1020 | 0 | 0 | 0 | 0 | 0 | 3395 | 30   | 119 | 82 | 92  | 110 | 59  | 37 | 6,5  |
| 1021 | 0 | 0 | 1 | 0 | 0 | 3260 | 42,5 | 108 | 79 | 88  | 93  | 65  |    | 6,1  |
| 1022 | 0 | 0 | 0 | 0 | 0 | 3410 | 30   | 136 | 82 | 96  | 104 | 73  | 38 | 7,5  |

|      |   |   |   |   |   |      |      |     |    |     |     |     |    |     |
|------|---|---|---|---|---|------|------|-----|----|-----|-----|-----|----|-----|
| 1023 | 0 | 0 | 0 | 0 | 0 | 3410 | 30   | 116 | 77 | 87  | 97  | 87  | 45 | 8,5 |
| 1024 | 0 | 0 | 1 | 0 | 0 | 3475 | 67,5 | 116 | 71 | 84  | 82  | 100 | 47 | 8,2 |
| 1025 | 0 | 0 | 0 | 0 | 1 | 3740 | 82,5 | 114 | 71 | 82  | 97  | 70  |    | 6,7 |
| 1026 | 0 | 0 | 0 | 0 | 0 | 3180 | 20   | 124 | 72 | 87  | 98  | 67  |    | 6,6 |
| 1027 | 0 | 0 | 0 | 0 | 1 | 3325 | 37,5 | 98  | 64 | 72  | 68  | 94  | 60 | 6,4 |
| 1028 | 0 | 0 | 0 | 0 | 1 | 3325 | 37,5 | 100 | 67 | 76  | 69  | 93  | 59 | 6,4 |
| 1029 | 0 | 0 | 0 | 0 | 0 | 3510 | 40   | 117 | 77 | 86  | 102 | 69  | 40 | 7   |
| 1030 | 0 | 0 | 0 | 0 | 0 | 3510 | 40   | 130 | 92 | 101 | 93  | 64  | 37 | 5,9 |
| 1031 | 0 | 0 | 0 | 0 | 0 | 3545 | 55   | 118 | 87 | 96  | 97  | 66  | 35 | 6,3 |
| 1032 | 0 | 0 | 0 | 0 | 0 | 3545 | 55   | 132 | 85 | 97  | 113 | 58  | 31 | 6,5 |
| 1033 | 0 | 0 | 0 | 0 | 0 | 3545 | 55   | 131 | 81 | 95  | 105 | 58  | 31 | 6,1 |
| 1034 | 0 | 0 | 0 | 0 | 1 | 3235 | 75   | 138 | 86 | 98  | 103 | 81  | 39 | 8,4 |
| 1035 | 0 | 0 | 0 | 0 | 1 | 3235 | 75   | 144 | 82 | 101 | 82  | 105 | 52 | 8,6 |
| 1036 | 0 | 0 | 0 | 0 | 0 | 3980 | 77,5 | 166 | 96 | 110 | 98  | 84  | 42 | 8,2 |
| 1037 | 0 | 0 | 0 | 0 | 0 | 4130 | 87,5 | 100 | 72 | 81  | 106 | 82  | 42 | 8,7 |
| 1038 | 0 | 0 | 0 | 0 | 0 | 2975 | 17,5 | 130 | 78 | 89  | 85  | 89  |    | 7,5 |
| 1039 | 0 | 0 | 0 | 0 | 1 | 3190 | 35   | 143 | 89 | 98  | 106 | 84  | 43 | 8,9 |
| 1040 | 0 | 0 | 0 | 0 | 1 | 3190 | 35   | 140 | 91 | 103 | 104 | 78  | 41 | 8,1 |
| 1041 | 0 | 0 | 1 | 0 | 1 | 3180 | 60   | 128 | 90 | 101 | 107 | 65  | 37 | 6,9 |
| 1042 | 0 | 0 | 1 | 0 | 1 | 3180 | 60   | 133 | 90 | 101 | 120 | 70  | 40 | 8,4 |
| 1043 | 0 | 0 | 0 | 0 | 1 | 2765 | 15   | 102 | 71 | 80  | 99  | 84  | 47 | 8,3 |
| 1044 | 0 | 0 | 0 | 0 | 1 | 2765 | 15   | 106 | 74 | 83  | 97  | 70  | 40 | 6,8 |
| 1045 | 0 | 0 | 0 | 0 | 1 | 4385 | 97,5 | 115 | 78 | 87  | 96  | 88  | 42 | 8,5 |
| 1046 | 0 | 0 | 0 | 0 | 1 | 4385 | 97,5 | 109 | 75 | 84  | 89  | 86  | 43 | 7,6 |
| 1047 | 0 | 0 | 0 | 0 | 1 | 4385 | 97,5 | 130 | 72 | 85  | 97  | 95  | 47 | 9,2 |
| 1048 | 0 | 0 | 0 | 0 | 1 | 4950 | 100  | 111 | 70 | 80  | 94  | 104 |    | 9,8 |
| 1049 | 0 | 0 | 0 | 0 | 0 | 3295 | 30   | 121 | 64 | 79  | 67  | 88  | 56 | 5,9 |
| 1050 | 0 | 0 | 0 | 0 | 0 | 3295 | 30   | 100 | 62 | 71  | 85  | 78  | 48 | 6,6 |
| 1051 | 0 | 0 | 0 | 0 | 0 | 4080 | 92,5 | 111 | 73 | 81  | 97  | 83  |    | 8   |
| 1052 | 0 | 0 | 0 | 0 | 1 | 3535 | 57,5 | 98  | 66 | 73  | 92  | 72  | 49 | 6,7 |
| 1053 | 0 | 0 | 0 | 0 | 1 | 3535 | 57,5 | 106 | 73 | 83  | 102 | 57  | 40 | 5,8 |
| 1054 | 0 | 0 | 2 | 0 | 1 | 2830 | 12,5 | 108 | 73 | 83  | 103 | 58  | 37 | 6   |
| 1055 | 0 | 0 | 2 | 0 | 1 | 2830 | 12,5 | 96  | 66 | 74  | 104 | 62  | 39 | 6,4 |

|      |   |   |   |   |   |      |      |     |    |     |     |     |    |      |
|------|---|---|---|---|---|------|------|-----|----|-----|-----|-----|----|------|
| 1056 | 0 | 0 | 0 | 0 | 1 | 2965 | 15   | 134 | 90 | 101 | 115 | 58  |    | 6,6  |
| 1057 | 0 | 0 | 0 | 0 | 0 | 3000 | 52,5 | 121 | 79 | 90  | 93  | 83  | 43 | 7,8  |
| 1058 | 0 | 0 | 0 | 0 | 0 | 3000 | 52,5 | 130 | 77 | 94  | 82  | 90  | 47 | 7,4  |
| 1059 | 0 | 0 | 0 | 0 | 1 | 3600 | 12   | 131 | 84 | 97  | 103 | 61  | 36 | 6,3  |
| 1060 | 0 | 0 | 0 | 0 | 1 | 3600 | 62,5 | 98  | 70 | 79  | 97  | 75  | 41 | 7,2  |
| 1061 | 0 | 0 | 0 | 0 | 1 | 3600 | 62,5 | 124 | 89 | 99  | 119 | 57  | 32 | 6,8  |
| 1062 | 0 | 0 | 0 | 0 | 0 | 3250 | 42,5 | 117 | 75 | 87  | 88  | 102 | 53 | 8,9  |
| 1063 | 0 | 0 | 0 | 0 | 0 | 3250 | 42,5 | 131 | 77 | 87  | 73  | 94  | 49 | 6,9  |
| 1064 | 0 | 0 | 1 | 0 | 0 | 3475 | 67,5 | 113 | 81 | 91  | 103 | 88  | 41 | 9,1  |
| 1065 | 0 | 0 | 0 | 0 | 0 | 3535 | 72,5 | 109 | 62 | 75  | 95  | 82  | 46 | 7,8  |
| 1066 | 0 | 0 | 0 | 0 | 0 | 3535 | 72,5 | 127 | 89 | 100 | 105 | 66  | 38 | 6,9  |
| 1067 | 0 | 0 | 0 | 0 | 0 | 3535 | 72,5 | 125 | 84 | 95  | 98  | 78  | 44 | 7,6  |
| 1068 | 0 | 0 | 0 | 0 | 1 | 3430 | 35   | 110 | 77 | 86  | 127 | 56  | 32 | 7    |
| 1069 | 0 | 0 | 0 | 0 | 1 | 3430 | 35   | 107 | 77 | 87  | 120 | 53  | 30 | 6,4  |
| 1070 | 0 | 0 | 0 | 0 | 1 | 3430 | 35   | 114 | 83 | 92  | 120 | 59  | 34 | 7    |
| 1071 | 0 | 0 | 0 | 0 | 1 | 3455 | 62,5 | 126 | 87 | 95  | 107 | 67  | 38 | 7,1  |
| 1072 | 0 | 0 | 0 | 0 | 1 | 3455 | 62,5 | 101 | 66 | 76  | 114 | 70  | 39 | 8    |
| 1073 | 0 | 0 | 0 | 0 | 1 | 3180 | 22,5 | 117 | 83 | 93  | 92  | 67  |    | 6,1  |
| 1074 | 0 | 0 | 0 | 0 | 0 | 3935 | 85   | 110 | 77 | 87  | 79  | 70  |    | 5,5  |
| 1075 | 0 | 0 | 0 | 0 | 1 | 3465 | 62,5 | 117 | 70 | 81  | 76  | 88  | 46 | 6,6  |
| 1076 | 0 | 0 | 0 | 0 | 1 | 3465 | 62,5 | 100 | 61 | 72  | 75  | 104 | 54 | 7,8  |
| 1077 | 0 | 0 | 0 | 0 | 1 | 3080 | 17,5 | 101 | 65 | 75  | 89  | 62  |    | 5,5  |
| 1078 | 0 | 0 | 0 | 0 | 1 | 3790 | 92,5 | 106 | 68 | 76  | 103 | 63  | 36 | 6,5  |
| 1079 | 0 | 0 | 0 | 0 | 0 | 4300 | 97,5 | 130 | 78 | 91  | 111 | 107 | 47 | 11,9 |
| 1080 | 0 | 0 | 0 | 0 | 0 | 4300 | 97,5 | 127 | 81 | 94  | 100 | 104 | 46 | 10,4 |
| 1081 | 0 | 0 | 1 | 0 | 1 | 4060 | 92,5 | 136 | 86 | 96  | 103 | 82  |    | 8,4  |
| 1082 | 0 | 0 | 0 | 0 | 0 | 2960 | 15   | 108 | 67 | 78  | 94  | 81  | 45 | 7,6  |
| 1083 | 0 | 0 | 0 | 0 | 0 | 2960 | 15   | 99  | 69 | 78  | 88  | 74  | 42 | 6,5  |
| 1084 | 0 | 0 | 0 | 0 | 0 | 3880 | 62,5 | 105 | 71 | 80  | 93  | 86  | 48 | 8    |
| 1085 | 0 | 0 | 0 | 0 | 0 | 3880 | 62,5 | 109 | 72 | 82  | 83  | 96  | 53 | 8    |
| 1086 | 0 | 0 | 0 | 0 | 0 | 3455 | 32,5 | 122 | 85 | 96  | 103 | 78  | 42 | 8    |
| 1087 | 0 | 0 | 0 | 0 | 0 | 3455 | 32,5 | 118 | 85 | 95  | 104 | 93  | 50 | 9,7  |
| 1088 | 0 | 0 | 0 | 0 | 0 | 3815 | 80   | 105 | 68 | 78  | 79  | 72  | 48 | 5,7  |

|      |   |   |   |   |   |      |      |     |    |     |     |     |    |      |
|------|---|---|---|---|---|------|------|-----|----|-----|-----|-----|----|------|
| 1089 | 0 | 0 | 0 | 0 | 0 | 2940 | 35   | 122 | 80 | 90  | 80  | 104 |    | 8,4  |
| 1090 | 0 | 0 | 0 | 0 | 1 | 3160 | 15   | 100 | 68 | 77  | 106 | 41  | 28 | 4,4  |
| 1091 | 0 | 0 | 0 | 0 | 1 | 3160 | 15   | 99  | 70 | 79  | 117 | 41  | 28 | 4,8  |
| 1092 | 0 | 0 | 0 | 0 | 1 | 3945 | 92,5 | 159 | 79 | 92  | 126 | 82  |    | 10,4 |
| 1093 | 0 | 0 | 0 | 0 | 0 | 3550 | 55   | 106 | 74 | 84  | 107 | 42  | 31 | 4,5  |
| 1094 | 0 | 0 | 0 | 0 | 1 | 4130 | 97,5 | 106 | 79 | 88  | 96  | 47  |    | 4,5  |
| 1095 | 0 | 0 | 0 | 0 | 0 | 3185 | 37,5 | 111 | 74 | 84  | 98  | 91  | 49 | 8,9  |
| 1096 | 0 | 0 | 0 | 0 | 0 | 3185 | 37,5 | 107 | 76 | 86  | 102 | 90  | 49 | 9,2  |
| 1097 | 0 | 0 | 0 | 0 | 0 | 3145 | 17,5 | 130 | 60 | 77  | 100 | 95  | 48 | 9,6  |
| 1098 | 0 | 0 | 0 | 0 | 0 | 3145 | 17,5 | 122 | 66 | 77  | 98  | 113 | 59 | 11,1 |
| 1099 | 0 | 0 | 0 | 0 | 1 | 3510 | 80   | 134 | 88 | 101 | 110 | 80  | 42 | 8,8  |
| 1100 | 0 | 0 | 0 | 0 | 1 | 3510 | 80   | 141 | 83 | 95  | 116 | 68  | 37 | 7,8  |
| 1101 | 0 | 0 | 0 | 0 | 1 | 3510 | 80   | 127 | 82 | 93  | 94  | 75  | 41 | 7,1  |
| 1102 | 0 | 0 | 0 | 0 | 0 | 3340 | 72,5 | 118 | 86 | 96  | 97  | 73  |    | 7    |
| 1103 | 0 | 0 | 1 | 0 | 1 | 3120 | 45   | 110 | 67 | 77  | 78  | 125 | 64 | 9,8  |
| 1104 | 0 | 0 | 1 | 0 | 1 | 3120 | 45   | 117 | 71 | 77  | 78  | 129 | 68 | 10,1 |
| 1105 | 0 | 0 | 1 | 0 | 1 | 3120 | 45   | 119 | 66 | 79  | 66  | 120 | 64 | 7,9  |
| 1106 | 0 | 0 | 0 | 0 | 0 | 3430 | 30   | 100 | 71 | 78  | 89  | 72  | 43 | 6,4  |
| 1107 | 0 | 0 | 0 | 0 | 0 | 3430 | 30   | 117 | 78 | 88  | 111 | 55  | 33 | 6,2  |
| 1108 | 0 | 0 | 0 | 0 | 0 | 3750 | 85   | 110 | 66 | 76  | 111 | 69  | 37 | 7,6  |
| 1109 | 0 | 0 | 0 | 0 | 0 | 3750 | 85   | 111 | 64 | 77  | 87  | 63  | 34 | 5,5  |
| 1110 | 0 | 0 | 3 | 0 | 1 | 2515 | 17,5 | 124 | 80 | 90  | 101 | 83  | 45 | 8,4  |
| 1111 | 0 | 0 | 3 | 0 | 1 | 2515 | 17,5 | 116 | 70 | 83  | 86  | 101 | 55 | 8,7  |
| 1112 | 0 | 0 | 3 | 0 | 1 | 2515 | 17,5 | 128 | 73 | 88  | 88  | 90  | 50 | 7,9  |
| 1113 | 0 | 0 | 0 | 0 | 0 | 3520 | 40   | 121 | 76 | 89  | 91  | 57  |    | 5,2  |
| 1114 | 0 | 0 | 0 | 0 | 1 | 4135 | 97,5 | 99  | 61 | 71  | 80  | 120 | 64 | 9,6  |
| 1115 | 0 | 0 | 0 | 0 | 1 | 4135 | 97,5 | 105 | 69 | 79  | 83  | 81  | 45 | 6,7  |
| 1116 | 0 | 0 | 0 | 0 | 0 | 3640 | 65   | 100 | 72 | 80  | 99  | 74  |    | 7,3  |
| 1117 | 0 | 0 | 0 | 0 | 1 | 3755 | 92,5 | 124 | 79 | 89  | 97  | 85  | 43 | 8,3  |
| 1118 | 0 | 0 | 0 | 0 | 1 | 3755 | 92,5 | 136 | 75 | 86  | 109 | 76  | 37 | 8,4  |
| 1119 | 0 | 0 | 0 | 0 | 1 | 3755 | 92,5 | 129 | 80 | 90  | 103 | 77  | 38 | 8    |
| 1120 | 0 | 0 | 0 | 0 | 0 | 3340 | 50   | 113 | 73 | 83  | 100 | 52  |    | 5,2  |
| 1121 | 0 | 0 | 0 | 0 | 1 | 3745 | 85   | 100 | 69 | 78  | 112 | 70  | 42 | 7,9  |



|      |   |   |   |   |   |      |      |     |    |    |     |     |    |     |
|------|---|---|---|---|---|------|------|-----|----|----|-----|-----|----|-----|
| 1122 | 0 | 0 | 0 | 0 | 1 | 3745 | 85   | 122 | 64 | 78 | 121 | 65  | 40 | 7,8 |
| 1123 | 0 | 0 | 0 | 0 | 1 | 3240 | 57,5 | 124 | 85 | 95 | 81  | 103 | 48 | 8,3 |
| 1124 | 0 | 0 | 0 | 0 | 1 | 3240 | 57,5 | 149 | 80 | 97 | 97  | 94  | 44 | 9,2 |
| 1125 | 0 | 0 | 1 | 0 | 1 | 2545 | 17,5 | 108 | 70 | 79 | 99  | 69  | 46 | 6,9 |
| 1126 | 0 | 0 | 1 | 0 | 1 | 2545 | 17,5 | 98  | 68 | 77 | 83  | 69  | 46 | 5,7 |
| 1127 | 0 | 0 | 0 | 0 | 0 | 3105 | 17,5 | 118 | 83 | 93 | 124 | 56  |    | 7   |
| 1128 | 0 | 0 | 0 | 0 | 0 | 3140 | 17,5 | 126 | 81 | 93 | 89  | 104 | 50 | 9,2 |
| 1129 | 0 | 0 | 0 | 0 | 1 | 2985 | 17,5 | 130 | 74 | 90 | 90  | 78  |    | 7   |
| 1130 | 0 | 0 | 0 | 0 | 0 | 3140 | 17,5 | 130 | 87 | 98 | 83  | 100 | 49 | 8,3 |
| 1131 | 0 | 0 | 0 | 0 | 1 | 2820 | 22,5 | 127 | 73 | 84 | 112 | 56  | 33 | 6,3 |
| 1132 | 0 | 0 | 0 | 0 | 0 | 3215 | 22,5 | 121 | 73 | 79 | 85  | 70  | 45 | 6   |
| 1133 | 0 | 0 | 0 | 0 | 0 | 3215 | 22,5 | 139 | 74 | 90 | 108 | 76  | 47 | 8,3 |
| 1134 | 0 | 0 | 0 | 0 | 1 | 2820 | 22,5 | 114 | 67 | 74 | 87  | 73  | 44 | 6,3 |
| 1135 | 0 | 0 | 0 | 0 | 0 | 3330 | 25   | 109 | 50 | 62 | 97  | 90  | 49 | 8,8 |
| 1136 | 0 | 0 | 0 | 0 | 0 | 3330 | 25   | 99  | 61 | 70 | 89  | 91  | 51 | 8,1 |
| 1137 | 0 | 0 | 0 | 0 | 0 | 3330 | 25   | 108 | 63 | 72 | 91  | 87  | 49 | 7,9 |
| 1138 | 0 | 0 | 0 | 0 | 1 | 3205 | 25   | 115 | 66 | 77 | 86  | 89  | 52 | 7,7 |
| 1139 | 0 | 0 | 0 | 0 | 1 | 3205 | 25   | 110 | 68 | 77 | 82  | 79  | 48 | 6,5 |
| 1140 | 0 | 0 | 0 | 0 | 1 | 2975 | 25   | 117 | 76 | 87 | 89  | 81  |    | 7,2 |
| 1141 | 0 | 0 | 0 | 0 | 1 | 3255 | 27,5 | 118 | 69 | 79 | 99  | 77  | 44 | 7,6 |
| 1142 | 0 | 0 | 0 | 0 | 0 | 3425 | 27,5 | 108 | 78 | 87 | 99  | 72  | 41 | 7,1 |
| 1143 | 0 | 0 | 0 | 0 | 1 | 3110 | 27,5 | 110 | 63 | 75 | 89  | 79  | 46 | 7   |
| 1144 | 0 | 0 | 0 | 0 | 1 | 3105 | 27,5 | 114 | 73 | 82 | 83  | 66  | 41 | 5,4 |
| 1145 | 0 | 0 | 0 | 0 | 0 | 3425 | 27,5 | 98  | 69 | 77 | 99  | 77  | 43 | 7,6 |
| 1146 | 0 | 0 | 0 | 0 | 1 | 2990 | 27,5 | 107 | 61 | 76 | 87  | 102 | 53 | 8,8 |
| 1147 | 0 | 0 | 0 | 0 | 1 | 3105 | 27,5 | 109 | 66 | 76 | 84  | 87  | 52 | 7,3 |
| 1148 | 0 | 0 | 0 | 0 | 1 | 2990 | 27,5 | 117 | 78 | 88 | 81  | 105 | 55 | 8,5 |
| 1149 | 0 | 0 | 0 | 0 | 1 | 3325 | 37,5 | 119 | 83 | 92 | 114 | 78  | 44 | 9   |
| 1150 | 0 | 0 | 0 | 0 | 1 | 3325 | 37,5 | 117 | 84 | 93 | 111 | 77  | 44 | 8,5 |
| 1151 | 0 | 0 | 0 | 0 | 1 | 3085 | 37,5 | 123 | 84 | 95 | 87  | 72  | 44 | 6,3 |
| 1152 | 0 | 0 | 0 | 0 | 1 | 3085 | 37,5 | 116 | 76 | 85 | 99  | 75  | 45 | 7,4 |
| 1153 | 0 | 0 | 0 | 0 | 0 | 2975 | 37,5 | 107 | 71 | 81 | 98  | 66  | 41 | 6,4 |
| 1154 | 0 | 0 | 0 | 0 | 1 | 2770 | 40   | 110 | 81 | 86 | 93  | 45  |    | 4,2 |

|      |   |   |   |   |   |      |      |     |    |     |     |     |    |      |
|------|---|---|---|---|---|------|------|-----|----|-----|-----|-----|----|------|
| 1155 | 0 | 0 | 0 | 0 | 1 | 3275 | 42,5 | 101 | 70 | 79  | 102 | 78  | 44 | 8    |
| 1156 | 0 | 0 | 0 | 0 | 1 | 3370 | 42,5 | 107 | 72 | 79  | 101 | 61  | 35 | 6,2  |
| 1157 | 0 | 0 | 0 | 0 | 1 | 3275 | 42,5 | 126 | 73 | 85  | 102 | 63  | 36 | 6,5  |
| 1158 | 0 | 0 | 0 | 0 | 1 | 3370 | 42,5 | 107 | 68 | 78  | 85  | 75  | 43 | 6,4  |
| 1159 | 0 | 0 | 0 | 0 | 1 | 3190 | 50   | 132 | 84 | 95  | 97  | 112 | 61 | 10,9 |
| 1160 | 0 | 0 | 0 | 0 | 1 | 3190 | 50   | 118 | 74 | 84  | 103 | 87  | 48 | 9,1  |
| 1161 | 0 | 0 | 0 | 0 | 1 | 3195 | 50   | 119 | 81 | 93  | 115 | 55  |    | 6,4  |
| 1162 | 0 | 0 | 0 | 0 | 1 | 3465 | 52,5 | 114 | 76 | 86  | 111 | 67  | 40 | 7,4  |
| 1163 | 0 | 0 | 0 | 0 | 1 | 3465 | 52,5 | 117 | 78 | 88  | 114 | 69  | 40 | 7,9  |
| 1164 | 0 | 0 | 0 | 0 | 0 | 3380 | 52,5 | 123 | 71 | 84  | 107 | 72  |    | 7,7  |
| 1165 | 0 | 0 | 0 | 0 | 0 | 3510 | 52,5 | 116 | 78 | 88  | 104 | 60  |    | 6,3  |
| 1166 | 0 | 0 | 0 | 0 | 0 | 3555 | 55   | 108 | 70 | 80  | 80  | 86  |    | 6,9  |
| 1167 | 0 | 0 | 0 | 0 | 0 | 3145 | 55   | 123 | 83 | 93  | 86  | 71  | 46 | 6,1  |
| 1168 | 0 | 0 | 0 | 0 | 1 | 3250 | 57,5 | 125 | 83 | 95  | 75  | 105 |    | 7,9  |
| 1169 | 0 | 0 | 0 | 0 | 0 | 3720 | 57,5 | 130 | 87 | 98  | 95  | 80  | 44 | 7,5  |
| 1170 | 0 | 0 | 0 | 0 | 0 | 3720 | 57,5 | 141 | 90 | 103 | 92  | 80  | 45 | 7,3  |
| 1171 | 0 | 0 | 0 | 0 | 0 | 3610 | 60   | 125 | 82 | 92  | 107 | 81  | 45 | 8,6  |
| 1172 | 0 | 0 | 0 | 0 | 0 | 3280 | 60   | 111 | 72 | 82  | 85  | 87  | 50 | 7,5  |
| 1173 | 0 | 0 | 0 | 0 | 0 | 3610 | 60   | 121 | 84 | 94  | 100 | 66  | 38 | 6,6  |
| 1174 | 0 | 0 | 0 | 0 | 0 | 3280 | 60   | 109 | 70 | 79  | 88  | 70  | 40 | 6,2  |
| 1175 | 0 | 0 | 0 | 0 | 1 | 3585 | 62,5 | 118 | 69 | 81  | 97  | 89  | 48 | 8,6  |
| 1176 | 0 | 0 | 0 | 0 | 0 | 3880 | 62,5 | 115 | 68 | 78  | 101 | 95  | 50 | 9,7  |
| 1177 | 0 | 0 | 0 | 0 | 1 | 3305 | 62,5 | 115 | 78 | 89  | 88  | 71  | 44 | 6,3  |
| 1178 | 0 | 0 | 0 | 0 | 1 | 3305 | 62,5 | 110 | 70 | 82  | 84  | 81  | 50 | 6,8  |
| 1179 | 0 | 0 | 0 | 0 | 1 | 3585 | 62,5 | 91  | 66 | 72  | 100 | 78  | 43 | 7,9  |
| 1180 | 0 | 0 | 0 | 0 | 0 | 3485 | 65   | 116 | 80 | 89  | 91  | 84  |    | 7,5  |
| 1181 | 0 | 0 |   | 0 | 0 | 3685 | 67,5 | 124 | 77 | 87  | 93  | 95  | 50 | 8,8  |
| 1182 | 0 | 0 |   | 0 | 0 | 3685 | 67,5 | 129 | 86 | 96  | 89  | 88  | 48 | 7,9  |
| 1183 | 0 | 0 | 0 | 0 | 1 | 3390 | 70   | 107 | 76 | 85  | 99  | 72  | 42 | 7,1  |
| 1184 | 0 | 0 | 0 | 0 | 0 | 3300 | 70   | 110 | 74 | 84  | 95  | 75  | 40 | 7,1  |
| 1185 | 0 | 0 | 0 | 0 | 1 | 3410 | 70   | 114 | 76 | 85  | 97  | 74  | 44 | 7,2  |
| 1186 | 0 | 0 | 0 | 0 | 1 | 3390 | 70   | 127 | 75 | 87  | 113 | 60  | 36 | 6,8  |
| 1187 | 0 | 0 | 0 | 0 | 1 | 2725 | 70   | 117 | 76 | 87  | 112 | 102 | 51 | 11,5 |

|      |   |   |   |   |   |      |      |     |    |     |     |     |    |      |
|------|---|---|---|---|---|------|------|-----|----|-----|-----|-----|----|------|
| 1188 | 0 | 0 | 0 | 0 | 0 | 3300 | 70   | 112 | 75 | 84  | 115 | 56  | 31 | 6,5  |
| 1189 | 0 | 0 | 0 | 0 | 1 | 3675 | 70   | 93  | 58 | 66  | 96  | 56  | 37 | 5,4  |
| 1190 | 0 | 0 | 0 | 0 | 1 | 2725 | 70   | 125 | 80 | 87  | 91  | 121 | 62 | 11,1 |
| 1191 | 0 | 0 | 0 | 0 | 1 | 3410 | 70   | 114 | 76 | 85  | 97  | 74  | 44 | 7,2  |
| 1192 | 0 | 0 | 0 | 0 | 1 | 3410 | 72,5 | 123 | 84 | 94  | 92  | 100 | 49 | 9,2  |
| 1193 | 0 | 0 | 0 | 0 | 0 | 3875 | 72,5 | 108 | 72 | 80  | 85  | 95  | 49 | 8    |
| 1194 | 0 | 0 | 0 | 0 | 1 | 3410 | 72,5 | 130 | 71 | 80  | 108 | 90  | 44 | 9,7  |
| 1195 | 0 | 0 | 0 | 0 | 0 | 3875 | 72,5 | 107 | 72 | 82  | 78  | 94  | 50 | 7,3  |
| 1196 | 0 | 0 | 0 | 0 | 1 | 3410 | 72,5 | 107 | 66 | 79  | 94  | 104 | 51 | 9,7  |
| 1197 | 0 | 0 | 0 | 0 | 0 | 3760 | 75   | 101 | 67 | 77  | 85  | 80  |    | 6,8  |
| 1198 | 0 | 0 | 0 | 0 | 1 | 3460 | 75   | 115 | 77 | 86  | 80  | 74  | 44 | 6    |
| 1199 | 0 | 0 | 0 | 0 | 1 | 3460 | 75   | 131 | 78 | 90  | 88  | 76  | 45 | 6,7  |
| 1200 | 0 | 0 | 0 | 0 | 0 | 3950 | 77,5 | 123 | 80 | 89  | 94  | 73  |    | 6,9  |
| 1201 | 0 | 0 | 0 | 0 | 0 | 3650 | 77,5 | 141 | 90 | 103 | 100 | 96  |    | 9,6  |
| 1202 | 0 | 0 | 0 | 0 | 1 | 3930 | 82,5 | 133 | 72 | 86  | 105 | 91  |    | 9,5  |
| 1203 | 0 | 0 | 1 | 0 | 0 | 4030 | 82,5 | 132 | 90 | 100 | 142 | 55  | 29 | 7,8  |
| 1204 | 0 | 0 | 1 | 0 | 0 | 4030 | 82,5 | 124 | 84 | 93  | 131 | 47  | 25 | 6,3  |
| 1205 | 0 | 0 | 1 | 0 | 0 | 4030 | 82,5 | 121 | 77 | 84  | 131 | 49  | 28 | 6,5  |
| 1206 | 0 | 0 | 0 | 0 | 1 | 3845 | 82,5 | 104 | 64 | 72  | 83  | 103 | 57 | 8,6  |
| 1207 | 0 | 0 | 0 | 0 | 1 | 3845 | 82,5 | 109 | 69 | 78  | 93  | 84  | 48 | 7,8  |
| 1208 | 0 | 0 | 0 | 0 | 1 | 2870 | 85   | 108 | 77 | 86  | 114 | 64  | 39 | 7,2  |
| 1209 | 0 | 0 | 0 | 0 | 1 | 3865 | 85   | 114 | 64 | 75  | 104 | 50  | 35 | 5,2  |
| 1210 | 0 | 0 | 0 | 0 | 1 | 3765 | 85   | 118 | 78 | 87  | 114 | 70  | 36 | 7,9  |
| 1211 | 0 | 0 | 0 | 0 | 1 | 3865 | 85   | 103 | 73 | 83  | 104 | 52  | 37 | 5,3  |
| 1212 | 0 | 0 | 0 | 0 | 0 | 3260 | 87,5 | 119 | 83 | 92  | 113 | 64  |    | 7,3  |
| 1213 | 0 | 0 | 0 | 0 | 0 | 3915 | 90   | 110 | 76 | 86  | 107 | 81  | 43 | 8,7  |
| 1214 | 0 | 0 | 0 | 0 | 0 | 4195 | 90   | 128 | 74 | 87  | 114 | 72  | 40 | 8,2  |
| 1215 | 0 | 0 | 0 | 0 | 0 | 4180 | 90   | 100 | 66 | 75  | 104 | 82  | 43 | 8,5  |
| 1216 | 0 | 0 | 0 | 0 | 0 | 3915 | 90   | 121 | 71 | 81  | 100 | 66  | 36 | 6,6  |
| 1217 | 0 | 0 | 0 | 0 | 0 | 4215 | 90   | 110 | 68 | 78  | 102 | 56  |    | 5,7  |
| 1218 | 0 | 0 | 0 | 0 | 0 | 4180 | 90   | 111 | 71 | 80  | 103 | 74  | 39 | 7,6  |
| 1219 | 0 | 0 | 0 | 0 | 0 | 4005 | 90   | 112 | 80 | 87  | 82  | 86  | 44 | 7,1  |
| 1220 | 0 | 0 | 0 | 0 | 0 | 4195 | 90   | 121 | 71 | 82  | 111 | 85  | 47 | 9,4  |

|      |   |   |   |   |   |      |      |     |    |     |     |     |    |      |
|------|---|---|---|---|---|------|------|-----|----|-----|-----|-----|----|------|
| 1221 | 0 | 0 | 1 | 0 | 1 | 4405 | 92,5 | 122 | 70 | 81  | 108 | 96  | 44 | 10,3 |
| 1222 | 0 | 0 | 0 | 0 | 0 | 4265 | 92,5 | 116 | 67 | 77  | 116 | 81  |    | 9,4  |
| 1223 | 0 | 0 | 1 | 0 | 1 | 4405 | 92,5 | 116 | 78 | 87  | 108 | 70  | 33 | 7,6  |
| 1224 | 0 | 0 | 0 | 0 | 1 | 4065 | 92,5 | 121 | 74 | 85  | 108 | 54  | 27 | 5,9  |
| 1225 | 0 | 0 | 0 | 0 | 0 | 4085 | 92,5 | 119 | 81 | 91  | 106 | 86  |    | 9,1  |
| 1226 | 0 | 0 | 0 | 0 | 1 | 4065 | 92,5 | 143 | 84 | 95  | 97  | 84  | 43 | 8,2  |
| 1227 | 0 | 0 | 0 | 0 | 0 | 4110 | 95   | 124 | 72 | 84  | 107 | 64  | 38 | 6,8  |
| 1228 | 0 | 0 | 0 | 0 | 0 | 4475 | 97,5 | 116 | 69 | 78  | 79  | 109 | 57 | 8,7  |
| 1229 | 0 | 0 | 0 | 0 | 0 | 4475 | 97,5 | 123 | 73 | 83  | 82  | 92  | 49 | 7,5  |
| 1230 | 0 | 0 | 0 | 0 | 0 | 3430 | 45   | 98  | 65 | 75  | 125 | 38  |    | 4,8  |
| 1231 | 0 | 0 | 0 | 0 | 0 | 3795 | 77,5 |     |    |     |     |     |    |      |
| 1232 | 0 | 0 | 0 | 0 | 0 | 3795 | 77,5 | 129 | 84 | 95  | 98  | 62  | 33 | 6,1  |
| 1233 | 0 | 0 | 0 | 0 | 0 | 3715 | 57,5 | 113 | 76 | 86  | 101 | 72  |    | 7,3  |
| 1234 | 0 | 0 | 0 | 0 | 1 | 2950 | 15   | 98  | 72 | 80  | 90  | 52  |    | 4,7  |
| 1235 | 0 | 0 | 2 | 0 | 0 | 3430 | 62,5 | 131 | 77 | 89  | 88  | 115 | 58 | 10,1 |
| 1236 | 0 | 0 | 2 | 0 | 0 | 3430 | 62,5 | 127 | 81 | 91  | 88  | 77  | 39 | 6,8  |
| 1237 | 0 | 0 | 1 | 0 | 1 | 3625 | 87,5 | 121 | 76 | 86  | 101 | 77  | 42 | 7,8  |
| 1238 | 0 | 0 | 1 | 0 | 1 | 3625 | 87,5 | 114 | 68 | 74  | 89  | 91  | 48 | 8,1  |
| 1239 | 0 | 0 | 0 | 0 | 1 | 3070 | 40   | 109 | 65 | 73  | 111 | 77  | 45 | 8,6  |
| 1240 | 0 | 0 | 0 | 0 | 1 | 3070 | 40   | 126 | 73 | 84  | 108 | 68  | 40 | 7,3  |
| 1241 | 0 | 0 | 0 | 0 | 1 | 3000 | 20   | 101 | 72 | 80  | 93  | 78  |    | 7,2  |
| 1242 | 0 | 0 | 0 | 0 | 0 | 3560 | 45   | 102 | 68 | 78  | 99  | 83  | 47 | 8,2  |
| 1243 | 0 | 0 | 0 | 0 | 0 | 3560 | 45   | 131 | 96 | 104 | 81  | 73  | 42 | 5,9  |
| 1244 | 0 | 0 | 0 | 0 | 0 | 3675 | 87,5 | 132 | 76 | 91  | 90  | 86  |    | 7,8  |
| 1245 | 0 | 0 | 0 | 0 | 1 | 3050 | 35   | 117 | 74 | 85  | 86  | 86  |    | 7,4  |
| 1246 | 0 | 0 | 0 | 0 | 0 | 3400 | 40   | 127 | 81 | 92  | 94  | 81  | 46 | 7,5  |
| 1247 | 0 | 0 | 0 | 0 | 0 | 3400 | 40   | 132 | 77 | 92  | 96  | 92  | 49 | 8,8  |
| 1248 | 0 | 0 | 0 | 0 | 0 | 3780 | 87,5 | 103 | 72 | 80  | 98  | 80  |    | 7,8  |
| 1249 | 0 | 0 | 0 | 0 | 0 | 2930 | 32,5 | 133 | 81 | 91  | 95  | 77  | 46 | 7,4  |
| 1250 | 0 | 0 | 1 | 0 | 0 | 2600 | 17,5 | 109 | 76 | 83  | 78  | 67  | 43 | 5,1  |
| 1251 | 0 | 0 | 1 | 0 | 0 | 2600 | 17,5 | 124 | 73 | 83  | 84  | 53  | 35 | 4,4  |
| 1252 | 0 | 0 | 0 | 0 | 0 | 3265 | 42,5 | 112 | 71 | 80  | 89  | 104 | 55 | 9,2  |
| 1253 | 0 | 0 | 0 | 0 | 0 | 3265 | 42,5 | 118 | 81 | 90  | 115 | 77  | 42 | 8,9  |

|      |   |   |   |   |   |      |      |     |    |     |     |     |    |      |
|------|---|---|---|---|---|------|------|-----|----|-----|-----|-----|----|------|
| 1254 | 0 | 0 | 0 | 0 | 0 | 3850 | 70   | 110 | 68 | 76  | 96  | 83  | 43 | 8    |
| 1255 | 0 | 0 | 0 | 0 | 0 | 3850 | 70   | 103 | 66 | 75  | 86  | 93  | 49 | 8    |
| 1256 | 0 | 0 | 0 | 0 | 0 | 3150 | 30   | 113 | 74 | 84  | 107 | 61  |    | 6,5  |
| 1257 | 0 | 0 | 0 | 0 | 0 | 3550 | 42,5 | 116 | 77 | 87  | 82  | 94  | 50 | 7,7  |
| 1258 | 0 | 0 | 0 | 0 | 0 | 3550 | 42,5 | 113 | 74 | 84  | 88  | 94  | 50 | 8,3  |
| 1259 | 0 | 0 | 0 | 0 | 1 | 4100 | 97,5 | 111 | 83 | 92  | 101 | 55  |    | 5,6  |
| 1260 | 0 | 0 | 0 | 0 | 0 | 3030 | 12,5 | 104 | 65 | 74  | 80  | 82  | 49 | 6,6  |
| 1261 | 0 | 0 | 0 | 0 | 0 | 3030 | 12,5 | 98  | 61 | 69  | 76  | 84  | 51 | 6,4  |
| 1262 | 0 | 0 | 0 | 0 | 0 | 3570 | 72,5 | 119 | 76 | 88  | 114 | 78  |    | 8,8  |
| 1263 | 0 | 0 | 0 | 0 | 0 | 3535 | 55   | 134 | 84 | 95  | 82  | 97  |    | 7,9  |
| 1264 | 0 | 0 | 0 | 0 | 1 | 2845 | 20   | 123 | 84 | 90  | 110 | 113 | 45 | 12,4 |
| 1265 | 0 | 0 | 0 | 0 | 1 | 2845 | 20   | 133 | 83 | 95  | 93  | 152 | 61 | 14,1 |
| 1266 | 0 | 0 | 0 | 0 | 0 | 3910 | 75   | 98  | 60 | 67  | 81  | 94  | 48 | 7,7  |
| 1267 | 0 | 0 | 0 | 0 | 1 | 3710 | 95   | 128 | 84 | 94  | 119 | 80  | 41 | 9,5  |
| 1268 | 0 | 0 | 0 | 0 | 1 | 3710 | 95   | 130 | 90 | 100 | 107 | 78  | 41 | 8,2  |
| 1269 | 0 | 0 | 0 | 0 | 1 | 4165 | 95   | 128 | 69 | 83  | 100 | 83  |    | 8,3  |
| 1270 | 0 | 0 | 0 | 0 | 0 | 3560 | 35   | 110 | 73 | 84  | 103 | 57  |    | 5,9  |
| 1271 | 0 | 0 | 0 | 0 | 0 | 3870 | 82,5 | 153 | 96 | 111 | 106 | 76  |    | 8    |
| 1272 | 0 | 0 | 0 | 0 | 0 | 3430 | 57,5 | 91  | 59 | 68  | 89  | 92  | 49 | 8,2  |
| 1273 | 0 | 0 | 0 | 0 | 0 | 3430 | 57,5 | 107 | 71 | 80  | 95  | 89  | 48 | 8,4  |
| 1274 | 0 | 0 | 0 | 0 | 0 | 3165 | 20   | 107 | 62 | 72  | 92  | 71  | 42 | 6,6  |
| 1275 | 0 | 0 | 0 | 0 | 0 | 3165 | 20   | 110 | 77 | 85  | 94  | 62  | 38 | 5,8  |
| 1276 | 0 | 0 | 2 | 0 | 0 | 4030 | 82,5 | 111 | 72 | 83  | 69  | 92  |    | 6,3  |
| 1277 | 0 | 0 | 0 | 0 | 1 | 3140 | 42,5 | 99  | 71 | 80  | 97  | 52  | 33 | 5,1  |
| 1278 | 0 | 0 | 0 | 0 | 1 | 3140 | 42,5 | 115 | 79 | 88  | 98  | 49  | 32 | 4,8  |
| 1279 | 0 | 0 | 0 | 0 | 0 | 3770 | 62,5 | 116 | 77 | 86  | 84  | 115 | 59 | 9,7  |
| 1280 | 0 | 0 | 0 | 0 | 0 | 3770 | 62,5 | 99  | 61 | 69  | 115 | 77  | 41 | 8,9  |
| 1281 | 0 | 0 | 0 | 0 | 0 | 3770 | 62,5 | 125 | 81 | 92  | 75  | 93  | 50 | 7    |
| 1282 | 0 | 0 | 1 | 0 | 0 | 4530 | 95   | 97  | 67 | 76  | 82  | 80  | 47 | 6,6  |
| 1283 | 0 | 0 | 1 | 0 | 0 | 4530 | 95   | 88  | 64 | 71  | 93  | 65  | 39 | 6    |
| 1284 | 0 | 0 | 0 | 0 | 1 | 3145 | 30   | 117 | 73 | 84  | 96  | 88  |    | 8,4  |
| 1285 | 0 | 0 | 0 | 0 | 0 | 3260 | 25   | 126 | 75 | 85  | 106 | 88  | 51 | 9,3  |
| 1286 | 0 | 0 | 0 | 0 | 0 | 3260 | 25   | 124 | 75 | 86  | 101 | 72  | 42 | 7,3  |

|      |   |   |   |   |   |      |      |     |    |     |     |     |    |     |
|------|---|---|---|---|---|------|------|-----|----|-----|-----|-----|----|-----|
| 1287 | 0 | 0 | 0 | 0 | 0 | 3420 | 42,5 | 101 | 70 | 78  | 75  | 105 | 53 | 7,9 |
| 1288 | 0 | 0 | 0 | 0 | 0 | 3420 | 42,5 | 87  | 59 | 68  | 71  | 100 | 53 | 7,1 |
| 1289 | 0 | 0 | 0 | 0 | 1 | 3365 | 52,5 | 97  | 75 | 82  | 110 | 61  | 36 | 6,8 |
| 1290 | 0 | 0 | 0 | 0 | 1 | 3365 | 52,5 | 96  | 70 | 78  | 105 | 73  | 42 | 7,6 |
| 1291 | 0 | 0 | 0 | 0 | 0 | 3300 | 45   | 134 | 89 | 100 | 110 | 65  | 38 | 7,1 |
| 1292 | 0 | 0 | 0 | 0 | 0 | 3300 | 45   | 132 | 79 | 93  | 95  | 74  | 45 | 7   |
| 1293 | 0 | 0 | 0 | 0 | 0 | 3300 | 45   | 123 | 91 | 99  | 115 | 47  | 29 | 5,4 |
| 1294 | 0 | 0 | 0 | 0 | 0 | 3860 | 82,5 | 98  | 66 | 76  | 81  | 81  | 47 | 6,5 |
| 1295 | 0 | 0 | 0 | 0 | 0 | 3860 | 82,5 | 108 | 71 | 79  | 88  | 70  | 41 | 6,2 |
| 1296 | 0 | 0 | 0 | 0 | 0 | 3910 | 95   | 130 | 82 | 93  | 87  | 100 |    | 8,7 |
| 1297 | 0 | 0 | 0 | 0 | 0 | 2960 | 15   | 107 | 67 | 79  | 92  | 85  |    | 7,8 |
| 1298 | 0 | 0 | 0 | 0 | 1 | 2860 | 22,5 | 123 | 76 | 87  | 87  | 75  | 45 | 6,5 |
| 1299 | 0 | 0 | 0 | 0 | 1 | 2860 | 22,5 | 109 | 75 | 85  | 93  | 61  | 37 | 5,6 |
| 1300 | 0 | 0 | 0 | 0 | 0 | 3380 | 70   | 127 | 86 | 97  | 97  | 81  |    | 7,9 |
| 1301 | 0 | 0 | 0 | 0 | 0 | 3685 | 80   | 106 | 64 | 75  | 84  | 57  |    | 4,8 |
| 1302 | 0 | 0 | 0 | 0 | 0 | 3635 | 40   | 126 | 81 | 87  | 91  | 104 | 53 | 9,5 |
| 1303 | 0 | 0 | 0 | 0 | 0 | 3635 | 40   | 119 | 77 | 88  | 98  | 87  | 45 | 8,5 |
| 1304 | 0 | 0 | 0 | 0 | 0 | 3850 | 95   | 142 | 79 | 96  | 74  | 74  | 47 | 5,4 |
| 1305 | 0 | 0 | 0 | 0 | 0 | 3850 | 95   | 121 | 63 | 72  | 69  | 92  | 57 | 6,4 |
| 1306 | 0 | 0 | 0 | 0 | 0 | 3025 | 32,5 | 111 | 83 | 92  | 104 | 66  | 36 | 6,9 |
| 1307 | 0 | 0 | 0 | 0 | 0 | 3025 | 32,5 | 108 | 78 | 87  | 89  | 71  | 40 | 6,3 |
| 1308 | 0 | 0 | 0 | 0 | 0 | 3025 | 32,5 | 110 | 76 | 84  | 81  | 67  | 39 | 5,5 |
| 1309 | 0 | 0 | 0 | 0 | 0 | 3150 | 45   | 121 | 87 | 96  | 105 | 82  | 38 | 8,6 |
| 1310 | 0 | 0 | 0 | 0 | 0 | 3150 | 45   | 114 | 84 | 93  | 106 | 82  | 39 | 8,7 |
| 1311 | 0 | 0 | 0 | 0 | 1 | 3415 | 57,5 | 114 | 82 | 91  | 91  | 78  |    | 7,2 |
| 1312 | 0 | 0 | 0 | 0 | 0 | 3605 | 75   | 134 | 83 | 94  | 108 | 73  | 40 | 7,9 |
| 1313 | 0 | 0 | 0 | 0 | 0 | 3605 | 75   | 131 | 83 | 91  | 113 | 65  | 35 | 7,3 |
| 1314 | 0 | 0 | 0 | 0 | 0 | 3965 | 70   | 122 | 79 | 91  | 86  | 106 | 50 | 9,2 |
| 1315 | 0 | 0 | 0 | 0 | 0 | 3965 | 70   | 140 | 80 | 94  | 95  | 79  | 37 | 7,6 |
| 1316 | 0 | 0 | 0 | 0 | 0 | 3740 | 62,5 | 108 | 79 | 85  | 111 | 72  | 38 | 8   |
| 1317 | 0 | 0 | 0 | 0 | 0 | 3740 | 62,5 | 131 | 81 | 93  | 94  | 83  | 44 | 7,7 |
| 1318 | 0 | 0 | 0 | 0 | 1 | 3615 | 65   | 140 | 89 | 100 | 114 | 68  | 34 | 7,7 |
| 1319 | 0 | 0 | 0 | 0 | 1 | 3615 | 65   | 140 | 93 | 104 | 104 | 77  | 40 | 8   |

|      |   |   |   |   |   |      |      |     |    |     |     |     |    |     |
|------|---|---|---|---|---|------|------|-----|----|-----|-----|-----|----|-----|
| 1320 | 0 | 0 | 0 | 0 | 0 | 4285 | 97,5 | 136 | 71 | 81  | 96  | 104 | 52 | 10  |
| 1321 | 0 | 0 | 0 | 0 | 0 | 4285 | 97,5 | 116 | 72 | 83  | 90  | 95  | 50 | 8,6 |
| 1322 | 0 | 0 | 0 | 0 | 1 | 3330 | 37,5 | 116 | 79 | 88  | 74  | 79  | 47 | 5,8 |
| 1323 | 0 | 0 | 0 | 0 | 0 | 3750 | 60   | 97  | 73 | 80  | 83  | 70  | 42 | 5,8 |
| 1324 | 0 | 0 | 0 | 0 | 0 | 3265 | 17,5 | 103 | 67 | 74  | 96  | 74  | 43 | 7,1 |
| 1325 | 0 | 0 | 0 | 0 | 0 | 3265 | 17,5 | 120 | 78 | 86  | 107 | 61  | 36 | 6,5 |
| 1326 | 0 | 0 | 0 | 0 | 1 | 3595 | 75   | 101 | 62 | 74  | 72  | 90  | 52 | 6,5 |
| 1327 | 0 | 0 | 0 | 0 | 1 | 3595 | 75   | 105 | 61 | 71  | 72  | 82  | 48 | 5,9 |
| 1328 | 0 | 0 | 0 | 0 | 0 | 3545 | 55   | 126 | 84 | 96  | 82  | 101 |    | 8,2 |
| 1329 | 0 | 0 | 0 | 0 | 0 | 3825 | 57,5 | 131 | 80 | 94  | 100 | 79  |    | 7,9 |
| 1330 | 0 | 0 | 0 | 0 | 0 | 3740 | 75   | 102 | 67 | 78  | 95  | 93  |    | 8,8 |
| 1331 | 0 | 0 | 0 | 0 | 1 | 3685 | 80   | 108 | 74 | 83  | 87  | 73  |    | 6,3 |
| 1332 | 0 | 0 | 0 | 0 | 0 | 3335 | 25   | 106 | 73 | 83  | 110 | 57  | 36 | 6,3 |
| 1333 | 0 | 0 | 0 | 0 | 0 | 3335 | 25   | 114 | 75 | 83  | 101 | 73  | 45 | 7,4 |
| 1334 | 0 | 0 |   | 0 | 0 | 3270 | 45   | 115 | 73 | 84  | 99  | 93  |    | 9,3 |
| 1335 | 0 | 0 | 0 | 0 | 0 | 3010 | 12,5 | 108 | 67 | 76  | 99  | 81  | 52 | 8   |
| 1336 | 0 | 0 | 0 | 0 | 0 | 3010 | 12,5 | 100 | 66 | 76  | 94  | 71  | 46 | 6,7 |
| 1337 | 0 | 0 | 0 | 0 | 0 | 3115 | 17,5 | 105 | 73 | 81  | 97  | 69  | 37 | 6,7 |
| 1338 | 0 | 0 | 0 | 0 | 0 | 3115 | 17,5 | 102 | 76 | 84  | 93  | 68  | 37 | 6,3 |
| 1339 | 0 | 0 | 0 | 0 | 0 | 4255 | 92,5 | 109 | 66 | 77  | 95  | 92  | 48 | 8,8 |
| 1340 | 0 | 0 | 0 | 0 | 0 | 4255 | 92,5 | 99  | 69 | 78  | 105 | 90  | 46 | 9,4 |
| 1341 | 0 | 0 | 0 | 0 | 0 | 3615 | 75   | 91  | 54 | 62  | 77  | 61  | 42 | 4,7 |
| 1342 | 0 | 0 | 0 | 0 | 0 | 3615 | 75   | 98  | 62 | 69  | 92  | 49  | 35 | 4,5 |
| 1343 | 0 | 0 | 0 | 0 | 0 | 3585 | 75   | 103 | 66 | 74  | 100 | 61  | 36 | 6,2 |
| 1344 | 0 | 0 | 0 | 0 | 0 | 3585 | 75   | 106 | 61 | 71  | 104 | 51  | 30 | 5,4 |
| 1345 | 0 | 0 | 0 | 0 | 1 | 3340 | 40   | 127 | 77 | 87  | 110 | 55  | 32 | 6,1 |
| 1346 | 0 | 0 | 0 | 0 | 1 | 3340 | 40   | 132 | 81 | 92  | 108 | 51  | 30 | 5,5 |
| 1347 | 0 | 0 | 1 | 0 | 0 | 3780 | 77,5 | 119 | 70 | 85  | 80  | 85  | 50 | 6,9 |
| 1348 | 0 | 0 | 1 | 0 | 0 | 3780 | 77,5 | 112 | 78 | 86  | 85  | 60  | 36 | 5,1 |
| 1349 | 0 | 0 | 1 | 0 | 1 | 3350 | 52,5 | 135 | 90 | 100 | 108 | 88  | 44 | 9,5 |
| 1350 | 0 | 0 | 0 | 0 | 1 | 3285 | 45   | 123 | 86 | 96  | 105 | 72  | 43 | 7,5 |
| 1351 | 0 | 0 | 0 | 0 | 1 | 3285 | 45   | 121 | 80 | 90  | 97  | 95  | 55 | 9,2 |
| 1352 | 0 | 0 | 0 | 0 | 0 | 4090 | 85   | 110 | 79 | 88  | 93  | 57  | 35 | 5,3 |

|      |   |   |   |   |   |      |      |     |    |     |     |     |    |     |
|------|---|---|---|---|---|------|------|-----|----|-----|-----|-----|----|-----|
| 1353 | 0 | 0 | 0 | 0 | 0 | 4090 | 85   | 134 | 83 | 93  | 94  | 68  | 39 | 6,5 |
| 1354 | 0 | 0 | 0 | 0 | 0 | 4090 | 85   | 118 | 77 | 87  | 92  | 68  | 41 | 6,3 |
| 1355 | 0 | 0 | 0 | 0 | 0 | 3585 | 60   | 119 | 80 | 89  | 95  | 83  | 47 | 7,9 |
| 1356 | 0 | 0 | 0 | 0 | 0 | 3585 | 60   | 120 | 77 | 87  | 95  | 80  | 46 | 7,6 |
| 1357 | 0 | 0 | 0 | 0 | 0 | 3585 | 60   | 125 | 82 | 94  | 88  | 71  | 43 | 6,3 |
| 1358 | 0 | 0 | 0 | 0 | 1 | 3175 | 22,5 | 122 | 78 | 89  | 83  | 85  | 44 | 7,1 |
| 1359 | 0 | 0 | 0 | 0 | 1 | 3175 | 22,5 | 103 | 73 | 81  | 91  | 86  | 45 | 7,8 |
| 1360 | 0 | 0 | 0 | 0 | 0 | 4195 | 90   | 115 | 68 | 77  | 97  | 67  | 37 | 6,5 |
| 1361 | 0 | 0 | 0 | 0 | 0 | 4195 | 90   | 115 | 77 | 87  | 91  | 89  | 47 | 8,1 |
| 1362 | 0 | 0 | 0 | 0 | 1 | 3580 | 72,5 | 115 | 75 | 85  | 85  | 79  |    | 6,7 |
| 1363 | 0 | 0 | 0 | 0 | 0 | 3390 | 27,5 | 107 | 75 | 84  | 106 | 58  | 36 | 6,1 |
| 1364 | 0 | 0 | 0 | 0 | 0 | 3390 | 27,5 | 111 | 71 | 82  | 99  | 70  | 43 | 6,9 |
| 1365 | 0 | 0 | 0 | 0 | 0 | 2880 | 27,5 | 101 | 67 | 76  | 101 | 67  | 40 | 6,7 |
| 1366 | 0 | 0 | 0 | 0 | 0 | 2880 | 27,5 | 106 | 61 | 71  | 91  | 66  | 40 | 6   |
| 1367 | 0 | 0 | 0 | 0 | 0 | 3875 | 82,5 | 119 | 71 | 81  | 97  | 87  | 45 | 8,4 |
| 1368 | 0 | 0 | 0 | 0 | 0 | 3875 | 82,5 | 113 | 73 | 82  | 82  | 108 | 55 | 9   |
| 1369 | 0 | 0 | 0 | 0 | 0 | 3655 | 52,5 | 132 | 80 | 90  | 112 | 78  | 44 | 8,8 |
| 1370 | 0 | 0 | 0 | 0 | 0 | 3655 | 52,5 | 140 | 90 | 101 | 119 | 59  | 34 | 7,1 |
| 1371 | 0 | 0 | 0 | 0 | 0 | 3270 | 30   | 130 | 86 | 97  | 92  | 82  |    | 7,5 |
| 1372 | 0 | 0 | 0 | 0 | 0 | 3255 | 17,5 | 109 | 77 | 86  | 92  | 75  | 46 | 6,9 |
| 1373 | 0 | 0 | 0 | 0 | 0 | 3255 | 17,5 | 121 | 81 | 91  | 83  | 89  | 53 | 7,4 |
| 1374 | 0 | 0 | 2 | 0 | 1 | 3940 | 87,5 | 97  | 69 | 77  | 81  | 85  | 47 | 6,9 |
| 1375 | 0 | 0 | 2 | 0 | 1 | 3940 | 87,5 | 107 | 69 | 78  | 89  | 99  | 53 | 8,8 |
| 1376 | 0 | 0 | 0 | 0 | 1 | 3120 | 17,5 | 115 | 67 | 78  | 92  | 81  | 47 | 7,5 |
| 1377 | 0 | 0 | 0 | 0 | 1 | 3120 | 17,5 | 116 | 70 | 80  | 89  | 74  | 43 | 6,6 |
| 1378 | 0 | 0 | 0 | 0 | 1 | 3270 | 60   | 102 | 70 | 79  | 120 | 61  | 39 | 7,3 |
| 1379 | 0 | 0 | 0 | 0 | 1 | 3270 | 60   | 124 | 65 | 85  | 105 | 60  | 38 | 6,3 |
| 1380 | 0 | 0 | 0 | 0 | 0 | 4785 | 97,5 | 124 | 80 | 90  | 105 | 75  | 42 | 7,9 |
| 1381 | 0 | 0 | 0 | 0 | 0 | 3235 | 25   | 97  | 70 | 78  | 92  | 74  |    | 6,8 |
| 1382 | 0 | 0 | 3 | 0 | 0 | 3175 | 67,5 | 105 | 71 | 80  | 98  | 72  | 41 | 7,1 |
| 1383 | 0 | 0 | 3 | 0 | 0 | 3175 | 67,5 | 104 | 67 | 74  | 80  | 84  | 49 | 6,8 |
| 1384 | 0 | 0 | 0 | 0 | 0 | 3805 | 77,5 | 110 | 72 | 81  | 100 | 74  | 41 | 7,5 |
| 1385 | 0 | 0 | 0 | 0 | 0 | 3805 | 77,5 | 123 | 74 | 84  | 115 | 75  | 41 | 8,7 |



|      |   |   |   |   |   |      |      |     |    |     |     |     |    |      |
|------|---|---|---|---|---|------|------|-----|----|-----|-----|-----|----|------|
| 1386 | 0 | 0 | 0 | 0 | 1 | 3536 | 57,5 | 115 | 78 | 88  | 102 | 110 | 60 | 11,2 |
| 1387 | 0 | 0 | 0 | 0 | 1 | 3536 | 57,5 | 123 | 80 | 90  | 101 | 97  | 55 | 9,8  |
| 1388 | 0 | 0 | 0 | 0 | 1 | 3536 | 57,5 | 115 | 79 | 88  | 100 | 75  | 43 | 7,5  |
| 1389 | 0 | 0 | 0 | 0 | 0 | 3340 | 65   | 112 | 70 | 80  | 97  | 70  | 36 | 6,9  |
| 1390 | 0 | 0 | 0 | 0 | 0 | 3340 | 65   | 122 | 76 | 86  | 96  | 83  | 42 | 7,9  |
| 1391 | 0 | 0 | 0 | 0 | 0 | 3075 | 22,5 | 150 | 95 | 109 | 110 | 65  | 33 | 7,1  |
| 1392 | 0 | 0 | 0 | 0 | 0 | 3075 | 22,5 | 159 | 95 | 112 | 92  | 73  | 37 | 6,7  |
| 1393 | 0 | 0 | 0 | 0 | 0 | 3390 | 27,5 | 111 | 67 | 80  | 95  | 79  | 43 | 7,5  |
| 1394 | 0 | 0 | 0 | 0 | 0 | 3390 | 27,5 | 106 | 70 | 80  | 83  | 86  | 49 | 7,2  |
| 1395 | 0 | 0 | 0 | 0 | 0 | 3710 | 82,5 | 130 | 87 | 98  | 117 | 86  |    | 10   |
| 1396 | 0 | 0 | 0 | 0 | 1 | 4005 | 95   | 117 | 78 | 87  | 104 | 72  | 39 | 7,5  |
| 1397 | 0 | 0 | 0 | 0 | 1 | 4005 | 95   | 135 | 87 | 100 | 115 | 84  | 44 | 9,6  |
| 1398 | 0 | 0 | 0 | 0 | 1 | 4005 | 95   | 128 | 61 | 76  | 102 | 68  | 37 | 6,9  |
| 1399 | 0 | 0 | 0 | 0 | 0 | 3240 | 42,5 | 117 | 70 | 80  | 106 | 63  | 37 | 6,7  |
| 1400 | 0 | 0 | 0 | 0 | 0 | 3240 | 42,5 | 101 | 68 | 77  | 95  | 69  | 42 | 6,5  |
| 1401 | 0 | 0 | 0 | 0 | 1 | 2995 | 17,5 | 128 | 79 | 92  | 103 | 60  |    | 6,2  |
| 1402 | 0 | 0 | 0 | 0 | 1 | 2900 | 42,5 | 101 | 70 | 80  | 99  | 62  | 37 | 6,1  |
| 1403 | 0 | 0 | 0 | 0 | 1 | 2900 | 42,5 | 105 | 68 | 78  | 99  | 65  | 39 | 6,4  |
| 1404 | 0 | 0 | 0 | 0 | 0 | 3125 | 27,5 | 105 | 71 | 81  | 78  | 80  |    | 6,2  |
| 1405 | 0 | 0 | 0 | 0 | 1 | 3570 | 90   | 105 | 72 | 82  | 98  | 67  |    | 6,6  |
| 1406 | 0 | 0 | 0 | 0 | 0 | 3325 | 32,5 | 113 | 79 | 88  | 98  | 72  |    | 7    |
| 1407 | 0 | 0 | 0 | 0 | 1 | 3095 | 37,5 | 117 | 78 | 88  | 119 | 75  | 40 | 8,9  |
| 1408 | 0 | 0 | 0 | 0 | 1 | 3095 | 37,5 | 124 | 81 | 91  | 104 | 87  | 47 | 9    |
| 1409 | 0 | 0 | 0 | 0 | 0 | 3600 | 60   | 119 | 84 | 94  | 82  | 87  | 51 | 7,1  |
| 1410 | 0 | 0 | 0 | 0 | 0 | 3600 | 60   | 111 | 70 | 81  | 76  | 98  | 56 | 7,5  |
| 1411 | 0 | 0 | 0 | 0 | 1 | 3020 | 82,5 | 107 | 77 | 86  | 106 | 50  |    | 5,4  |
| 1412 | 0 | 0 | 0 | 0 | 0 | 3540 | 72,5 | 93  | 65 | 73  | 92  | 94  | 55 | 8,6  |
| 1413 | 0 | 0 | 0 | 0 | 0 | 3540 | 72,5 | 94  | 66 | 74  | 101 | 76  | 46 | 7,6  |
| 1414 | 0 | 0 | 0 | 0 | 0 | 3345 | 72,5 | 110 | 74 | 83  | 100 | 64  | 38 | 6,4  |
| 1415 | 0 | 0 | 0 | 0 | 0 | 3345 | 72,5 | 106 | 72 | 82  | 93  | 77  | 44 | 7,2  |
| 1416 | 0 | 0 | 0 | 0 | 0 | 4315 | 97,5 | 130 | 88 | 99  | 87  | 81  | 45 | 7    |
| 1417 | 0 | 0 | 0 | 0 | 0 | 3195 | 57,5 | 108 | 75 | 85  | 102 | 54  | 32 | 5,5  |
| 1418 | 0 | 0 | 0 | 0 | 0 | 3195 | 57,5 | 110 | 74 | 84  | 91  | 76  | 45 | 6,9  |

|      |   |   |   |   |   |      |      |     |    |     |     |     |    |     |
|------|---|---|---|---|---|------|------|-----|----|-----|-----|-----|----|-----|
| 1419 | 0 | 0 | 0 | 0 | 1 | 3120 | 72,5 | 134 | 85 | 97  | 116 | 74  |    | 8,6 |
| 1420 | 1 | 0 | 0 | 0 | 0 | 2490 | 65   | 110 | 71 | 81  | 71  | 92  | 55 | 6,5 |
| 1421 | 1 | 0 | 0 | 0 | 0 | 2580 | 52,5 | 127 | 90 | 101 | 87  | 85  |    | 7,4 |
| 1422 | 1 | 0 | 0 | 0 | 0 | 2585 | 32,5 | 128 | 90 | 101 | 97  | 76  | 47 | 7,4 |
| 1423 | 1 | 0 | 0 | 0 | 0 | 2585 | 32,5 | 124 | 81 | 91  | 92  | 77  | 47 | 7,1 |
| 1424 | 1 | 0 | 0 | 0 | 1 | 2090 | 45   | 102 | 75 | 84  | 114 | 60  | 36 | 6,9 |
| 1425 | 1 | 0 | 0 | 0 | 1 | 2090 | 45   | 111 | 71 | 81  | 96  | 82  | 48 | 7,9 |
| 1426 | 1 | 0 | 0 | 0 | 1 | 2835 | 55   | 103 | 79 | 87  | 112 | 45  | 28 | 5,1 |
| 1427 | 1 | 0 | 0 | 0 | 1 | 2835 | 55   | 128 | 95 | 105 | 128 | 39  | 25 | 5   |
| 1428 | 1 | 0 | 0 | 0 | 0 | 2765 | 50   | 111 | 72 | 81  | 95  | 83  | 44 | 7,8 |
| 1429 | 1 | 0 | 0 | 0 | 0 | 2765 | 50   | 123 | 74 | 85  | 95  | 77  | 42 | 7,3 |
| 1430 | 1 | 0 | 0 | 0 | 1 | 2175 | 50   | 118 | 80 | 90  | 90  | 76  | 47 | 6,7 |
| 1431 | 1 | 0 | 0 | 0 | 1 | 2175 | 50   | 121 | 72 | 83  | 98  | 80  | 49 | 7,7 |
| 1432 | 1 | 0 | 3 | 0 | 1 | 2880 | 85   | 117 | 80 | 90  | 106 | 73  | 37 | 7,7 |
| 1433 | 1 | 0 | 3 | 0 | 1 | 2880 | 85   | 109 | 78 | 87  | 99  | 78  | 40 | 7,7 |
| 1434 | 1 | 0 | 0 | 0 | 1 | 2435 | 30   | 105 | 77 | 85  | 99  | 89  | 49 | 8,8 |
| 1435 | 1 | 0 | 0 | 0 | 1 | 2435 | 30   | 111 | 74 | 84  | 82  | 107 | 58 | 8,9 |
| 1436 | 1 | 0 | 0 | 0 | 1 | 3030 | 85   | 121 | 74 | 86  | 110 | 68  | 37 | 7,5 |
| 1437 | 1 | 0 | 0 | 0 | 1 | 3030 | 85   | 131 | 81 | 93  | 114 | 70  | 38 | 8   |
| 1438 | 1 | 0 | 0 | 0 | 1 | 3030 | 85   | 124 | 73 | 81  | 119 | 64  | 35 | 7,6 |
| 1439 | 1 | 0 | 2 | 0 | 0 | 3230 | 90   | 124 | 77 | 88  | 93  | 97  | 57 | 9   |
| 1440 | 1 | 0 | 2 | 0 | 0 | 3230 | 90   | 107 | 76 | 85  | 95  | 91  | 52 | 8,6 |
| 1441 | 1 | 0 | 0 | 0 | 1 | 2625 | 45   | 109 | 73 | 82  | 88  | 80  | 49 | 7   |
| 1442 | 1 | 0 | 0 | 0 | 1 | 2625 | 45   | 117 | 72 | 82  | 77  | 103 | 61 | 7,9 |
| 1443 | 1 | 0 | 0 | 0 | 0 | 2725 | 37,5 | 103 | 69 | 77  | 79  | 83  | 49 | 6,6 |
| 1444 | 1 | 0 | 0 | 0 | 0 | 2725 | 37,5 | 102 | 75 | 83  | 79  | 80  | 47 | 6,3 |
| 1445 | 1 | 0 | 2 | 0 | 1 | 3020 | 82,5 | 117 | 73 | 84  | 91  | 105 | 52 | 9,5 |
| 1446 | 1 | 0 | 2 | 0 | 1 | 3020 | 82,5 | 122 | 69 | 82  | 78  | 111 | 56 | 8,6 |
| 1447 | 1 | 0 | 0 | 0 | 1 | 2915 | 75   | 105 | 73 | 80  | 102 | 62  | 39 | 6,3 |
| 1448 | 1 | 0 | 0 | 0 | 1 | 2915 | 75   | 119 | 66 | 74  | 113 | 56  | 35 | 6,3 |
| 1449 | 1 | 0 | 0 | 0 | 1 | 2975 | 77,5 | 127 | 73 | 83  | 79  | 108 | 57 | 8,5 |
| 1450 | 1 | 0 | 0 | 0 | 1 | 2975 | 77,5 | 130 | 82 | 91  | 94  | 92  | 49 | 8,6 |
| 1451 | 1 | 0 | 1 | 0 | 0 | 3070 | 85   | 110 | 73 | 83  | 121 | 57  | 37 | 6,8 |

|      |   |   |   |   |   |      |      |     |     |     |     |     |    |      |
|------|---|---|---|---|---|------|------|-----|-----|-----|-----|-----|----|------|
| 1452 | 1 | 0 | 1 | 0 | 0 | 3070 | 85   | 122 | 83  | 92  | 114 | 73  | 46 | 8,3  |
| 1453 | 0 | 1 | 0 | 0 | 0 | 2345 | 77,5 | 107 | 71  | 81  | 86  | 77  |    | 6,6  |
| 1454 | 0 | 1 | 0 | 0 | 1 | 1850 | 100  | 128 | 88  | 99  | 95  | 94  | 48 | 8,9  |
| 1455 | 0 | 1 | 0 | 0 | 0 | 1836 | 17,5 | 121 | 84  | 95  | 100 | 87  | 46 | 8,7  |
| 1456 | 0 | 1 | 0 | 0 | 0 | 1836 | 17,5 | 116 | 77  | 87  | 139 | 56  | 30 | 7,8  |
| 1457 | 0 | 1 | 0 | 0 | 0 | 1836 | 17,5 | 127 | 80  | 91  | 97  | 106 | 56 | 10,3 |
| 1458 | 0 | 1 | 0 | 0 | 1 | 3200 | 52,5 | 135 | 81  | 92  | 114 | 72  | 46 | 8,1  |
| 1459 | 0 | 1 | 0 | 0 | 1 | 3200 | 52,5 | 126 | 84  | 95  | 100 | 58  | 38 | 5,8  |
| 1460 | 0 | 1 | 0 | 0 | 1 | 1744 | 80   | 111 | 77  | 87  | 101 | 62  | 37 | 6,3  |
| 1461 | 0 | 1 | 0 | 0 | 1 | 1744 | 80   | 106 | 75  | 84  | 92  | 66  | 39 | 6,1  |
| 1462 | 0 | 1 | 0 | 0 | 0 | 2010 | 57,5 | 107 | 68  | 78  | 104 | 76  | 48 | 7,9  |
| 1463 | 0 | 1 | 1 | 0 | 0 | 2375 | 82,5 | 108 | 74  | 83  | 90  | 72  | 41 | 6,5  |
| 1464 | 0 | 1 | 1 | 0 | 0 | 2375 | 82,5 | 114 | 71  | 81  | 100 | 72  | 41 | 7,3  |
| 1465 | 0 | 1 | 0 | 0 | 0 | 2935 | 82,5 | 121 | 76  | 87  | 84  | 72  | 43 | 6    |
| 1466 | 0 | 1 | 0 | 0 | 0 | 2935 | 82,5 | 101 | 66  | 74  | 92  | 66  | 39 | 6    |
| 1467 | 0 | 1 | 0 | 0 | 1 | 1875 | 57,5 | 114 | 74  | 85  | 78  | 94  | 53 | 7,3  |
| 1468 | 0 | 1 | 0 | 0 | 1 | 1875 | 57,5 | 105 | 69  | 79  | 81  | 88  | 51 | 7,1  |
| 1469 | 0 | 1 | 0 | 0 | 1 | 1875 | 57,5 | 123 | 69  | 86  | 103 | 67  | 39 | 7    |
| 1470 | 0 | 0 |   | 0 | 1 | 927  | 12,5 | 147 | 85  | 95  | 91  | 70  |    | 6,3  |
| 1471 | 0 | 0 |   | 0 | 0 | 2835 | 17,5 | 142 | 102 | 112 | 99  | 54  |    | 5,3  |
| 1472 | 0 | 0 |   | 0 | 0 | 3830 | 80   | 134 | 94  | 105 | 95  | 77  |    | 7,3  |
| 1473 | 0 | 0 |   | 0 |   | 3595 | 50   | 122 | 84  | 95  | 73  | 103 |    | 7,6  |
| 1474 | 0 | 0 |   |   | 1 | 2775 | 15   | 116 | 80  | 89  | 105 | 71  | 40 | 7,5  |
| 1475 | 0 | 0 |   |   | 0 | 3650 | 52,5 | 124 | 75  | 87  | 100 | 105 | 56 | 10,5 |
| 1476 | 0 | 0 |   |   | 0 | 3650 | 52,5 | 124 | 74  | 86  | 105 | 98  | 53 | 10,3 |
| 1477 | 0 | 0 |   |   | 0 | 4840 | 100  | 117 | 73  | 84  | 92  | 96  | 51 | 8,8  |
| 1478 | 0 | 0 |   |   | 0 | 3235 | 25   | 103 | 69  | 78  | 91  | 85  | 51 | 7,7  |
| 1479 | 0 | 0 |   |   | 1 | 2840 | 25   | 124 | 84  | 96  | 87  | 97  | 52 | 8,4  |
| 1480 | 0 | 0 |   |   | 0 | 3235 | 25   | 105 | 72  | 79  | 91  | 73  | 46 | 6,6  |
| 1481 | 0 | 0 |   |   | 1 | 3245 | 57,5 | 109 | 70  | 81  | 98  | 72  | 42 | 7,1  |
| 1482 | 0 | 0 |   |   | 1 | 3245 | 57,5 | 103 | 73  | 81  | 89  | 71  | 42 | 6,4  |
| 1483 | 0 | 0 |   |   | 1 | 3295 | 62,5 | 108 | 74  | 83  | 94  | 69  | 40 | 6,5  |
| 1484 | 0 | 0 |   |   | 1 | 3295 | 62,5 | 106 | 75  | 84  | 98  | 71  | 41 | 7    |

|      |   |   |  |   |      |      |     |    |    |     |     |    |      |
|------|---|---|--|---|------|------|-----|----|----|-----|-----|----|------|
| 1485 | 0 | 0 |  | 0 | 3305 | 50   | 124 | 81 | 92 | 100 | 61  | 35 | 6,1  |
| 1486 | 0 | 0 |  | 0 | 3505 | 52,5 | 101 | 64 | 73 | 105 | 69  | 44 | 7,2  |
| 1487 | 0 | 0 |  | 0 | 3505 | 52,5 | 106 | 63 | 74 | 103 | 75  | 47 | 7,8  |
| 1488 | 0 | 0 |  | 1 | 3155 | 32,5 | 92  | 62 | 70 | 103 | 77  | 50 | 8    |
| 1489 | 0 | 0 |  | 1 | 3740 | 67,5 | 118 | 81 | 91 | 108 | 75  | 39 | 8,1  |
| 1490 | 0 | 0 |  | 0 | 3640 | 52,5 | 134 | 67 | 86 | 96  | 61  | 38 | 5,9  |
| 1491 | 0 | 0 |  | 0 | 3640 | 52,5 | 115 | 80 | 90 | 94  | 61  | 37 | 5,7  |
| 1492 | 0 | 0 |  | 0 | 3015 | 12,5 | 136 | 76 | 91 | 84  | 98  | 55 | 8,3  |
| 1493 | 0 | 0 |  | 0 | 3150 | 12,5 | 121 | 74 | 84 | 93  | 66  | 40 | 6,1  |
| 1494 | 0 | 0 |  | 0 | 3150 | 12,5 | 121 | 76 | 87 | 79  | 74  | 45 | 5,8  |
| 1495 | 0 | 0 |  | 0 | 3015 | 12,5 | 111 | 76 | 86 | 83  | 103 | 58 | 8,4  |
| 1496 | 0 | 0 |  | 1 | 2735 | 12,5 | 109 | 61 | 72 | 89  | 76  | 45 | 6,8  |
| 1497 | 0 | 0 |  | 1 | 2735 | 12,5 | 123 | 73 | 83 | 97  | 84  | 48 | 8,1  |
| 1498 | 0 | 0 |  | 1 | 2880 | 12,5 | 111 | 74 | 84 | 87  | 74  | 45 | 6,4  |
| 1499 | 0 | 0 |  | 1 | 2880 | 12,5 | 126 | 76 | 88 | 95  | 86  | 50 | 8,1  |
| 1500 | 0 | 0 |  | 0 | 2805 | 15   | 106 | 68 | 78 | 112 | 77  | 43 | 8,7  |
| 1501 | 0 | 0 |  | 1 | 2775 | 15   | 124 | 82 | 92 | 88  | 90  | 50 | 7,9  |
| 1502 | 0 | 0 |  | 0 | 2805 | 15   | 116 | 80 | 89 | 116 | 69  | 38 | 8    |
| 1503 | 0 | 0 |  | 1 | 2755 | 17,5 | 107 | 73 | 82 | 105 | 102 | 53 | 10,7 |
| 1504 | 0 | 0 |  | 1 | 2975 | 17,5 | 114 | 81 | 90 | 95  | 58  | 37 | 5,5  |
| 1505 | 0 | 0 |  | 1 | 2755 | 17,5 | 99  | 69 | 79 | 111 | 79  | 41 | 8,7  |
| 1506 | 0 | 0 |  | 0 | 2955 | 17,5 | 103 | 70 | 79 | 89  | 73  | 45 | 6,5  |
| 1507 | 0 | 0 |  | 0 | 2955 | 17,5 | 92  | 62 | 70 | 82  | 84  | 51 | 6,9  |
| 1508 | 0 | 0 |  | 1 | 3165 | 20   | 113 | 72 | 82 | 103 | 68  | 40 | 7    |
| 1509 | 0 | 0 |  | 1 | 3045 | 20   | 118 | 79 | 90 | 100 | 83  | 45 | 8,3  |
| 1510 | 0 | 0 |  | 1 | 3035 | 20   | 123 | 85 | 95 | 87  | 88  | 49 | 7,6  |
| 1511 | 0 | 0 |  | 1 | 3045 | 20   | 126 | 78 | 90 | 90  | 83  | 46 | 7,5  |
| 1512 | 0 | 0 |  | 1 | 3165 | 20   | 109 | 75 | 85 | 132 | 60  | 35 | 7,8  |
| 1513 | 0 | 0 |  | 1 | 2790 | 22,5 | 113 | 75 | 85 | 90  | 91  | 47 | 8,2  |
| 1514 | 0 | 0 |  | 0 | 3220 | 22,5 | 128 | 82 | 91 | 86  | 77  | 45 | 6,6  |
| 1515 | 0 | 0 |  | 0 | 3220 | 22,5 | 131 | 79 | 91 | 81  | 85  | 50 | 6,9  |
| 1516 | 0 | 0 |  | 0 | 2890 | 22,5 | 118 | 73 | 83 | 87  | 91  | 51 | 8    |
| 1517 | 0 | 0 |  | 1 | 2790 | 22,5 | 123 | 68 | 80 | 83  | 104 | 52 | 8,6  |

|      |   |   |  |   |      |      |     |    |     |     |     |    |      |
|------|---|---|--|---|------|------|-----|----|-----|-----|-----|----|------|
| 1518 | 0 | 0 |  | 0 | 2890 | 22,5 | 118 | 73 | 85  | 84  | 97  | 54 | 8,2  |
| 1519 | 0 | 0 |  | 1 | 3205 | 22,5 | 125 | 86 | 96  | 108 | 71  | 38 | 7,7  |
| 1520 | 0 | 0 |  | 0 | 3360 | 25   | 114 | 74 | 84  | 85  | 71  | 42 | 6    |
| 1521 | 0 | 0 |  | 0 | 3360 | 25   | 109 | 76 | 84  | 88  | 82  | 47 | 7,2  |
| 1522 | 0 | 0 |  | 0 | 3260 | 27,5 | 115 | 76 | 86  | 89  | 77  | 39 | 6,8  |
| 1523 | 0 | 0 |  | 1 | 2535 | 27,5 | 105 | 73 | 82  | 106 | 74  | 42 | 7,8  |
| 1524 | 0 | 0 |  | 1 | 2535 | 27,5 | 99  | 69 | 77  | 89  | 70  | 41 | 6,2  |
| 1525 | 0 | 0 |  | 0 | 3415 | 32,5 | 108 | 73 | 83  | 94  | 61  | 39 | 5,7  |
| 1526 | 0 | 0 |  | 0 | 3025 | 32,5 | 108 | 76 | 86  | 122 | 56  | 33 | 6,8  |
| 1527 | 0 | 0 |  | 0 | 3415 | 32,5 | 106 | 64 | 77  | 103 | 84  | 52 | 8,7  |
| 1528 | 0 | 0 |  | 0 | 3025 | 32,5 | 123 | 75 | 86  | 99  | 69  | 42 | 6,9  |
| 1529 | 0 | 0 |  | 1 | 3270 | 32,5 | 118 | 73 | 80  | 91  | 76  | 45 | 6,9  |
| 1530 | 0 | 0 |  | 1 | 3270 | 32,5 |     |    |     |     |     |    |      |
| 1531 | 0 | 0 |  | 1 | 3155 | 32,5 | 113 | 63 | 73  | 92  | 89  | 57 | 8,1  |
| 1532 | 0 | 0 |  | 1 | 3200 | 35   | 126 | 76 | 88  | 95  | 86  | 50 | 8,1  |
| 1533 | 0 | 0 |  | 1 | 3200 | 35   | 106 | 69 | 80  | 87  | 89  | 52 | 7,7  |
| 1534 | 0 | 0 |  | 1 | 3095 | 37,5 | 118 | 70 | 84  | 97  | 70  | 42 | 6,8  |
| 1535 | 0 | 0 |  | 1 | 3095 | 37,5 | 131 | 75 | 88  | 97  | 81  | 48 | 7,8  |
| 1536 | 0 | 0 |  | 0 | 3395 | 40   | 139 | 82 | 97  | 125 | 76  | 37 | 9,5  |
| 1537 | 0 | 0 |  | 0 | 3210 | 40   | 116 | 78 | 88  | 116 | 64  | 35 | 7,4  |
| 1538 | 0 | 0 |  | 0 | 3210 | 40   | 114 | 79 | 89  | 112 | 76  | 43 | 8,6  |
| 1539 | 0 | 0 |  | 0 | 3230 | 40   | 117 | 82 | 92  | 103 | 60  | 36 | 6,2  |
| 1540 | 0 | 0 |  | 1 | 3340 | 40   | 127 | 73 | 89  | 106 | 95  | 48 | 10,1 |
| 1541 | 0 | 0 |  | 1 | 3340 | 40   | 131 | 72 | 81  | 89  | 110 | 55 | 9,7  |
| 1542 | 0 | 0 |  | 0 | 3230 | 40   | 132 | 89 | 101 | 96  | 54  | 33 | 5,2  |
| 1543 | 0 | 0 |  | 0 | 3395 | 40   | 125 | 85 | 96  | 122 | 79  | 39 | 9,7  |
| 1544 | 0 | 0 |  | 0 | 3275 | 42,5 | 116 | 68 | 81  | 103 | 78  | 48 | 7,9  |
| 1545 | 0 | 0 |  | 1 | 3255 | 42,5 | 130 | 79 | 90  | 112 | 61  | 37 | 6,8  |
| 1546 | 0 | 0 |  | 0 | 3275 | 42,5 | 111 | 74 | 85  | 81  | 89  | 56 | 7,2  |
| 1547 | 0 | 0 |  | 1 | 3440 | 45   | 106 | 74 | 83  | 93  | 71  | 44 | 6,6  |
| 1548 | 0 | 0 |  | 1 | 3440 | 45   | 115 | 80 | 87  | 105 | 67  | 43 | 7    |
| 1549 | 0 | 0 |  | 0 | 3440 | 45   | 116 | 84 | 93  | 99  | 74  | 41 | 7,3  |
| 1550 | 0 | 0 |  | 0 | 3125 | 45   | 106 | 71 | 80  | 101 | 61  | 35 | 6,1  |

|      |   |   |  |   |      |      |     |    |     |     |     |    |     |
|------|---|---|--|---|------|------|-----|----|-----|-----|-----|----|-----|
| 1551 | 0 | 0 |  | 0 | 3125 | 45   | 124 | 78 | 90  | 98  | 63  | 37 | 6,1 |
| 1552 | 0 | 0 |  | 1 | 3180 | 47,5 | 123 | 79 | 90  | 125 | 58  | 33 | 7,2 |
| 1553 | 0 | 0 |  | 1 | 3180 | 47,5 | 117 | 76 | 86  | 97  | 82  | 45 | 8   |
| 1554 | 0 | 0 |  | 1 | 3460 | 47,5 | 138 | 87 | 98  | 102 | 79  | 44 | 8   |
| 1555 | 0 | 0 |  | 1 | 3460 | 47,5 | 118 | 80 | 90  | 114 | 79  | 43 | 8,9 |
| 1556 | 0 | 0 |  | 0 | 3600 | 47,5 | 115 | 79 | 89  | 107 | 64  | 37 | 6,8 |
| 1557 | 0 | 0 |  | 1 | 2655 | 47,5 | 122 | 71 | 85  | 76  | 97  | 56 | 7,4 |
| 1558 | 0 | 0 |  | 1 | 2655 | 47,5 | 133 | 79 | 95  | 92  | 74  | 43 | 6,8 |
| 1559 | 0 | 0 |  | 0 | 3600 | 47,5 | 114 | 72 | 83  | 108 | 73  | 41 | 7,9 |
| 1560 | 0 | 0 |  | 0 | 3305 | 50   | 121 | 83 | 94  | 107 | 62  | 34 | 6,6 |
| 1561 | 0 | 0 |  | 0 | 3495 | 50   | 124 | 90 | 100 | 103 | 60  | 38 | 6,1 |
| 1562 | 0 | 0 |  | 1 | 3165 | 50   | 124 | 84 | 95  | 91  | 79  | 44 | 7,2 |
| 1563 | 0 | 0 |  | 1 | 3165 | 50   | 113 | 76 | 86  | 98  | 58  | 34 | 5,7 |
| 1564 | 0 | 0 |  | 0 | 3495 | 50   | 118 | 84 | 94  | 112 | 57  | 36 | 6,4 |
| 1565 | 0 | 0 |  | 0 | 3490 | 50   | 111 | 77 | 86  | 90  | 71  | 39 | 6,4 |
| 1566 | 0 | 0 |  | 0 | 3490 | 50   | 111 | 77 | 86  | 90  | 71  | 39 | 6,4 |
| 1567 | 0 | 0 |  | 0 | 3485 | 50   | 107 | 76 | 85  | 93  | 67  | 35 | 6,2 |
| 1568 | 0 | 0 |  | 0 | 3485 | 50   | 98  | 71 | 79  | 88  | 62  | 34 | 5,5 |
| 1569 | 0 | 0 |  | 0 | 3320 | 50   | 100 | 68 | 77  | 88  | 57  | 32 | 5   |
| 1570 | 0 | 0 |  | 1 | 3230 | 52,5 | 119 | 66 | 75  | 139 | 53  | 31 | 7,4 |
| 1571 | 0 | 0 |  | 0 | 3635 | 52,5 | 108 | 75 | 84  | 97  | 74  | 42 | 7,1 |
| 1572 | 0 | 0 |  | 1 | 2985 | 52,5 | 109 | 76 | 86  | 106 | 64  | 38 | 6,8 |
| 1573 | 0 | 0 |  | 0 | 3515 | 52,5 | 124 | 80 | 91  | 113 | 72  | 41 | 8,1 |
| 1574 | 0 | 0 |  | 1 | 3230 | 52,5 | 108 | 56 | 66  | 122 | 68  | 39 | 8,3 |
| 1575 | 0 | 0 |  | 1 | 2985 | 52,5 | 135 | 95 | 106 | 98  | 60  | 36 | 5,9 |
| 1576 | 0 | 0 |  | 0 | 3635 | 52,5 | 121 | 74 | 84  | 103 | 75  | 41 | 7,6 |
| 1577 | 0 | 0 |  | 0 | 3515 | 52,5 | 116 | 74 | 86  | 98  | 91  | 53 | 8,9 |
| 1578 | 0 | 0 |  | 1 | 3405 | 55   | 128 | 73 | 81  | 90  | 88  | 42 | 7,9 |
| 1579 | 0 | 0 |  | 1 | 3405 | 55   | 121 | 77 | 88  | 82  | 95  | 46 | 7,6 |
| 1580 | 0 | 0 |  | 1 | 2590 | 57,5 | 123 | 84 | 93  | 107 | 89  | 43 | 9,5 |
| 1581 | 0 | 0 |  | 1 | 2590 | 57,5 | 115 | 73 | 84  | 93  | 106 | 50 | 9,8 |
| 1582 | 0 | 0 |  | 0 | 3725 | 57,5 | 111 | 78 | 88  | 105 | 66  | 35 | 6,9 |
| 1583 | 0 | 0 |  | 1 | 3400 | 57,5 | 106 | 75 | 84  | 96  | 69  | 40 | 6,6 |

|      |   |   |  |   |      |      |     |    |     |     |     |    |      |
|------|---|---|--|---|------|------|-----|----|-----|-----|-----|----|------|
| 1584 | 0 | 0 |  | 1 | 3400 | 57,5 | 108 | 78 | 86  | 96  | 72  | 43 | 6,9  |
| 1585 | 0 | 0 |  | 0 | 3205 | 57,5 | 87  | 66 | 71  | 76  | 81  | 49 | 6,1  |
| 1586 | 0 | 0 |  | 0 | 3725 | 57,5 | 119 | 77 | 89  | 91  | 76  | 42 | 6,9  |
| 1587 | 0 | 0 |  | 0 | 3205 | 57,5 | 90  | 60 | 69  | 75  | 68  | 43 | 5,1  |
| 1588 | 0 | 0 |  | 0 | 3605 | 60   | 117 | 77 | 87  | 108 | 82  | 50 | 8,8  |
| 1589 | 0 | 0 |  | 0 | 3605 | 60   | 124 | 71 | 83  | 112 | 61  | 37 | 6,8  |
| 1590 | 0 | 0 |  | 1 | 3280 | 60   | 125 | 70 | 86  | 69  | 95  | 53 | 6,6  |
| 1591 | 0 | 0 |  | 1 | 3280 | 60   | 109 | 66 | 76  | 70  | 111 | 60 | 7,7  |
| 1592 | 0 | 0 |  | 0 | 3460 | 62,5 | 108 | 76 | 86  | 102 | 83  | 46 | 8,4  |
| 1593 | 0 | 0 |  | 0 | 3460 | 62,5 | 114 | 79 | 89  | 97  | 91  | 49 | 8,8  |
| 1594 | 0 | 0 |  | 0 | 3775 | 62,5 | 108 | 69 | 79  | 85  | 71  | 46 | 6    |
| 1595 | 0 | 0 |  | 0 | 3775 | 62,5 | 99  | 68 | 77  | 96  | 84  | 53 | 8,1  |
| 1596 | 0 | 0 |  | 0 | 3460 | 65   | 100 | 68 | 77  | 100 | 58  | 33 | 5,8  |
| 1597 | 0 | 0 |  | 1 | 3740 | 67,5 | 116 | 80 | 90  | 117 | 72  | 37 | 8,5  |
| 1598 | 0 | 0 |  | 0 | 3410 | 70   | 114 | 74 | 85  | 104 | 58  | 39 | 6,1  |
| 1599 | 0 | 0 |  | 0 | 3690 | 70   | 102 | 73 | 81  | 119 | 63  | 38 | 7,4  |
| 1600 | 0 | 0 |  | 0 | 3690 | 70   | 102 | 69 | 79  | 110 | 67  | 40 | 7,4  |
| 1601 | 0 | 0 |  | 1 | 3380 | 70   | 117 | 72 | 86  | 90  | 95  | 53 | 8,6  |
| 1602 | 0 | 0 |  | 1 | 3380 | 70   | 115 | 81 | 90  | 94  | 66  | 39 | 6,2  |
| 1603 | 0 | 0 |  | 0 | 3410 | 70   | 108 | 77 | 86  | 94  | 71  | 46 | 6,7  |
| 1604 | 0 | 0 |  | 1 | 3560 | 72,5 | 142 | 93 | 106 | 98  | 91  | 40 | 8,9  |
| 1605 | 0 | 0 |  | 0 | 3735 | 72,5 | 141 | 91 | 102 | 93  | 68  | 35 | 6,3  |
| 1606 | 0 | 0 |  | 0 | 2870 | 72,5 | 117 | 81 | 89  | 105 | 74  | 38 | 7,8  |
| 1607 | 0 | 0 |  | 1 | 3420 | 72,5 | 132 | 82 | 96  | 120 | 99  | 47 | 11,9 |
| 1608 | 0 | 0 |  | 0 | 3735 | 72,5 | 126 | 82 | 95  | 94  | 91  | 46 | 8,6  |
| 1609 | 0 | 0 |  | 1 | 3695 | 72,5 | 103 | 69 | 78  | 92  | 60  | 36 | 5,6  |
| 1610 | 0 | 0 |  | 1 | 3585 | 72,5 | 121 | 90 | 99  | 102 | 73  | 41 | 7,4  |
| 1611 | 0 | 0 |  | 1 | 3585 | 72,5 | 123 | 85 | 95  | 102 | 73  | 41 | 7,4  |
| 1612 | 0 | 0 |  | 1 | 3410 | 72,5 | 100 | 69 | 78  | 85  | 85  | 50 | 7,2  |
| 1613 | 0 | 0 |  | 0 | 2870 | 72,5 | 123 | 81 | 90  | 99  | 71  | 36 | 7    |
| 1614 | 0 | 0 |  | 1 | 3695 | 72,5 | 105 | 71 | 81  | 83  | 60  | 36 | 4,9  |
| 1615 | 0 | 0 |  | 1 | 3420 | 72,5 | 131 | 86 | 96  | 113 | 89  | 42 | 10,1 |
| 1616 | 0 | 0 |  | 1 | 3410 | 72,5 | 106 | 70 | 80  | 91  | 75  | 45 | 6,8  |

|      |   |   |  |   |      |      |     |    |    |     |    |    |     |
|------|---|---|--|---|------|------|-----|----|----|-----|----|----|-----|
| 1617 | 0 | 0 |  | 0 | 3610 | 75   | 144 | 75 | 87 | 107 | 65 | 40 | 7   |
| 1618 | 0 | 0 |  | 0 | 3610 | 75   | 130 | 79 | 89 | 103 | 78 | 47 | 8   |
| 1619 | 0 | 0 |  | 0 | 3935 | 75   | 122 | 84 | 94 | 95  | 71 | 39 | 6,7 |
| 1620 | 0 | 0 |  | 0 | 3935 | 75   | 109 | 79 | 88 | 106 | 56 | 32 | 5,9 |
| 1621 | 0 | 0 |  | 0 | 3600 | 75   | 133 | 85 | 97 | 80  | 89 | 46 | 7,1 |
| 1622 | 0 | 0 |  | 0 | 3600 | 75   | 126 | 81 | 92 | 80  | 99 | 51 | 7,9 |
| 1623 | 0 | 0 |  | 1 | 3885 | 77,5 | 117 | 70 | 79 | 100 | 74 | 40 | 7,4 |
| 1624 | 0 | 0 |  | 0 | 3495 | 77,5 | 123 | 78 | 89 | 95  | 68 | 42 | 6,4 |
| 1625 | 0 | 0 |  | 1 | 3885 | 77,5 | 118 | 68 | 79 | 102 | 82 | 44 | 8,4 |
| 1626 | 0 | 0 |  | 1 | 3670 | 80   | 101 | 69 | 78 | 92  | 82 | 46 | 7,5 |
| 1627 | 0 | 0 |  | 1 | 3705 | 80   | 111 | 75 | 85 | 92  | 69 | 42 | 6,3 |
| 1628 | 0 | 0 |  | 1 | 3670 | 80   | 109 | 75 | 84 | 100 | 78 | 44 | 7,7 |
| 1629 | 0 | 0 |  | 1 | 3560 | 82,5 | 135 | 88 | 99 | 97  | 75 | 46 | 7,2 |
| 1630 | 0 | 0 |  | 1 | 3560 | 82,5 | 116 | 78 | 88 | 99  | 72 | 44 | 7,1 |
| 1631 | 0 | 0 |  | 0 | 3890 | 82,5 | 105 | 76 | 85 | 102 | 66 | 36 | 6,7 |
| 1632 | 0 | 0 |  | 1 | 3860 | 82,5 | 96  | 67 | 76 | 101 | 79 | 43 | 7,9 |
| 1633 | 0 | 0 |  | 1 | 3860 | 82,5 | 100 | 74 | 82 | 110 | 68 | 37 | 7,5 |
| 1634 | 0 | 0 |  | 1 | 3230 | 82,5 | 108 | 68 | 79 | 87  | 74 | 44 | 6,4 |
| 1635 | 0 | 0 |  | 0 | 3890 | 82,5 | 123 | 76 | 88 | 86  | 96 | 50 | 8,2 |
| 1636 | 0 | 0 |  | 1 | 3230 | 82,5 | 107 | 70 | 80 | 91  | 65 | 40 | 5,9 |
| 1637 | 0 | 0 |  | 0 | 3985 | 87,5 | 109 | 75 | 84 | 98  | 64 | 41 | 6,3 |
| 1638 | 0 | 0 |  | 1 | 3940 | 87,5 | 121 | 73 | 86 | 95  | 94 | 54 | 8,9 |
| 1639 | 0 | 0 |  | 1 | 3940 | 87,5 | 141 | 65 | 76 | 106 | 90 | 50 | 9,6 |
| 1640 | 0 | 0 |  | 0 | 4015 | 90   | 122 | 82 | 91 | 134 | 59 | 36 | 7,9 |
| 1641 | 0 | 0 |  | 1 | 4050 | 90   | 103 | 66 | 76 | 92  | 79 | 46 | 7,2 |
| 1642 | 0 | 0 |  | 0 | 4015 | 90   | 115 | 75 | 84 | 126 | 65 | 39 | 8,2 |
| 1643 | 0 | 0 |  | 1 | 3890 | 92,5 | 106 | 74 | 83 | 98  | 80 | 45 | 7,9 |
| 1644 | 0 | 0 |  | 0 | 4100 | 92,5 | 116 | 78 | 88 | 133 | 65 | 33 | 8,6 |
| 1645 | 0 | 0 |  | 0 | 4100 | 92,5 | 117 | 80 | 90 | 129 | 59 | 30 | 7,6 |
| 1646 | 0 | 0 |  | 1 | 3890 | 92,5 | 132 | 61 | 79 | 90  | 82 | 47 | 7,4 |
| 1647 | 0 | 0 |  | 1 | 4100 | 95   | 92  | 65 | 73 | 87  | 91 | 51 | 8   |
| 1648 | 0 | 0 |  | 1 | 4100 | 95   | 97  | 65 | 74 | 79  | 84 | 50 | 6,6 |
| 1649 | 0 | 0 |  | 0 | 4195 | 95   | 142 | 87 | 98 | 114 | 71 | 43 | 8   |



|      |   |   |  |   |      |      |     |    |     |     |     |    |      |
|------|---|---|--|---|------|------|-----|----|-----|-----|-----|----|------|
| 1650 | 0 | 0 |  | 0 | 4195 | 95   | 128 | 87 | 98  | 86  | 90  | 57 | 7,7  |
| 1651 | 0 | 0 |  | 0 | 4040 | 95   | 109 | 74 | 83  | 98  | 70  | 38 | 6,9  |
| 1652 | 0 | 0 |  | 0 | 4040 | 95   | 110 | 74 | 84  | 102 | 77  | 42 | 7,8  |
| 1653 | 0 | 0 |  | 0 | 4235 | 97,5 | 118 | 79 | 89  | 93  | 90  | 41 | 8,3  |
| 1654 | 0 | 0 |  |   | 4295 | 97,5 | 105 | 70 | 78  | 121 | 66  | 36 | 7,9  |
| 1655 | 0 | 0 |  | 1 | 4260 | 97,5 | 133 | 84 | 96  | 93  | 101 | 54 | 9,4  |
| 1656 | 0 | 0 |  | 1 | 4345 | 97,5 | 125 | 72 | 82  | 119 | 73  | 39 | 8,7  |
| 1657 | 0 | 0 |  |   | 4295 | 97,5 | 97  | 65 | 74  | 99  | 66  | 37 | 6,6  |
| 1658 | 0 | 0 |  | 1 | 4260 | 97,5 | 142 | 95 | 105 | 108 | 65  | 35 | 7    |
| 1659 | 0 | 0 |  | 1 | 4345 | 97,5 | 130 | 78 | 93  | 102 | 88  | 47 | 8,9  |
| 1660 | 0 | 0 |  | 0 | 4235 | 97,5 | 124 | 81 | 93  | 105 | 74  | 34 | 7,8  |
| 1661 | 0 | 0 |  | 1 | 4105 | 97,5 | 127 | 81 | 91  | 99  | 74  | 39 | 7,3  |
| 1662 | 0 | 0 |  | 1 | 4905 | 100  | 101 | 72 | 80  | 91  | 83  | 44 | 7,6  |
| 1663 | 0 | 0 |  | 1 | 4905 | 100  | 107 | 69 | 79  | 107 | 85  | 44 | 9    |
| 1664 | 0 | 0 |  | 1 | 3440 | 60   | 119 | 73 | 82  | 103 | 109 | 53 | 11,2 |
| 1665 | 0 | 0 |  | 1 | 3440 | 60   | 110 | 65 | 76  | 105 | 95  | 46 | 9,9  |
| 1666 | 0 | 0 |  | 0 | 3265 | 17,5 | 121 | 77 | 88  | 89  | 106 | 54 | 9,6  |
| 1667 | 0 | 0 |  | 0 | 3265 | 17,5 | 133 | 81 | 92  | 79  | 81  | 43 | 6,4  |
| 1668 | 0 | 0 |  | 0 | 3830 | 67,5 | 122 | 81 | 92  | 75  | 79  | 43 | 5,9  |
| 1669 | 0 | 0 |  | 0 | 3830 | 67,5 | 108 | 72 | 82  | 72  | 92  | 50 | 6,6  |
| 1670 | 0 | 0 |  | 1 | 3105 | 40   | 105 | 62 | 72  | 77  | 74  | 43 | 5,7  |
| 1671 | 0 | 0 |  | 1 | 3105 | 40   | 99  | 60 | 70  | 65  | 88  | 50 | 5,7  |
| 1672 | 0 | 0 |  | 1 | 3535 | 82,5 | 109 | 71 | 83  | 129 | 48  | 30 | 6,3  |
| 1673 | 0 | 0 |  | 1 | 3535 | 82,5 | 110 | 68 | 78  | 97  | 61  | 38 | 5,9  |
| 1674 | 0 | 0 |  | 0 | 3370 | 52,5 | 143 | 72 | 88  | 102 | 89  | 45 | 9,2  |
| 1675 | 0 | 0 |  | 0 | 3370 | 52,5 | 132 | 79 | 90  | 118 | 86  | 42 | 10,1 |
| 1676 | 0 | 0 |  | 1 | 3445 | 60   | 113 | 76 | 86  | 115 | 68  | 38 | 7,8  |
| 1677 | 0 | 0 |  | 0 | 3590 | 60   | 109 | 80 | 89  | 93  | 85  | 48 | 7,9  |
| 1678 | 0 | 0 |  | 0 | 3590 | 60   | 97  | 70 | 78  | 91  | 98  | 55 | 8,9  |
| 1679 | 0 | 0 |  | 0 | 3840 | 80   | 125 | 80 | 88  | 91  | 94  | 47 | 8,6  |
| 1680 | 0 | 0 |  | 0 | 3840 | 80   | 119 | 78 | 88  | 103 | 86  | 43 | 8,8  |
| 1681 | 0 | 0 |  | 0 | 2920 | 15   | 111 | 77 | 87  | 96  | 65  | 44 | 6,3  |
| 1682 | 0 | 0 |  | 0 | 2920 | 15   | 114 | 76 | 85  | 101 | 56  | 38 | 5,6  |

|      |   |   |  |   |      |      |     |     |     |     |     |    |      |
|------|---|---|--|---|------|------|-----|-----|-----|-----|-----|----|------|
| 1683 | 0 | 0 |  | 1 | 3620 | 65   | 93  | 66  | 74  | 98  | 81  | 48 | 7,9  |
| 1684 | 0 | 0 |  | 1 | 3620 | 65   | 102 | 69  | 79  | 106 | 74  | 45 | 7,9  |
| 1685 | 0 | 0 |  | 0 | 3190 | 37,5 | 117 | 74  | 85  | 100 | 82  | 46 | 8,2  |
| 1686 | 0 | 0 |  | 0 | 3190 | 37,5 | 107 | 73  | 83  | 98  | 92  | 50 | 9    |
| 1687 | 0 | 0 |  | 1 | 3275 | 20   | 99  | 64  | 74  | 85  | 92  | 56 | 7,8  |
| 1688 | 0 | 0 |  | 1 | 3275 | 20   | 101 | 66  | 76  | 81  | 81  | 50 | 6,6  |
| 1689 | 0 | 0 |  | 1 | 3580 | 72,5 | 125 | 91  | 101 | 107 | 97  | 47 | 10,4 |
| 1690 | 0 | 0 |  | 1 | 3580 | 72,5 | 124 | 74  | 87  | 111 | 82  | 40 | 9,2  |
| 1691 | 0 | 0 |  | 1 | 4040 | 90   | 118 | 70  | 82  | 90  | 82  | 47 | 7,4  |
| 1692 | 0 | 0 |  | 1 | 4040 | 90   | 105 | 73  | 79  | 113 | 77  | 44 | 8,7  |
| 1693 | 0 | 0 |  | 1 | 2880 | 12,5 | 144 | 85  | 101 | 114 | 95  | 52 | 10,8 |
| 1694 | 0 | 0 |  | 1 | 2880 | 12,5 | 127 | 81  | 94  | 102 | 84  | 46 | 8,5  |
| 1695 | 0 | 0 |  | 1 | 3605 | 65   | 122 | 68  | 79  | 98  | 87  | 48 | 8,5  |
| 1696 | 0 | 0 |  | 1 | 3605 | 65   | 93  | 61  | 70  | 80  | 100 | 57 | 8    |
| 1697 | 0 | 0 |  | 0 | 3635 | 90   | 110 | 71  | 82  | 116 | 68  | 34 | 7,9  |
| 1698 | 0 | 0 |  | 1 | 3140 | 30   | 131 | 95  | 106 | 118 | 63  | 37 | 7,4  |
| 1699 | 0 | 0 |  | 1 | 3140 | 30   | 148 | 89  | 98  | 101 | 64  | 38 | 6,5  |
| 1700 | 0 | 0 |  | 1 | 1140 | 0    | 135 | 89  | 101 | 77  | 63  | 35 | 4,8  |
| 1701 | 0 | 0 |  | 1 | 380  | 0    | 138 | 97  | 108 | 98  | 67  | 30 | 6,6  |
| 1702 | 0 | 0 |  | 1 | 1302 | 2,5  | 149 | 105 | 115 | 110 | 55  | 30 | 6,1  |
| 1703 | 0 | 0 |  | 0 | 524  | 2,5  | 139 | 85  | 97  | 86  | 80  | 50 | 7    |
| 1704 | 0 | 0 |  | 1 | 1092 | 5    | 164 | 95  | 110 | 72  | 128 | 57 | 9,3  |
| 1705 | 0 | 0 |  | 1 | 440  | 7,5  | 149 | 87  | 102 | 95  | 91  | 46 | 8,6  |
| 1706 | 0 | 0 |  | 1 | 660  | 10   | 118 | 84  | 94  | 70  | 84  | 48 | 5,9  |
| 1707 | 0 | 0 |  | 1 | 770  | 10   | 150 | 97  | 108 | 115 | 57  | 29 | 6,5  |
| 1708 | 0 | 0 |  | 0 | 1078 | 17,5 | 149 | 93  | 105 | 79  | 66  | 34 | 5,2  |
| 1709 | 0 | 0 |  | 1 | 1335 | 17,5 | 136 | 109 | 114 | 98  | 76  | 39 | 7,4  |
| 1710 | 0 | 0 |  | 1 | 1410 | 17,5 | 139 | 101 | 109 | 106 | 69  | 42 | 7,3  |
| 1711 | 0 | 0 |  | 0 | 1770 | 20   | 137 | 87  | 97  | 114 | 64  | 33 | 7,3  |
| 1712 | 0 | 0 |  | 0 | 1057 | 20   | 168 | 109 | 121 | 93  | 73  | 37 | 6,8  |
| 1713 | 0 | 0 |  | 0 | 856  | 22,5 | 121 | 90  | 99  | 105 | 84  | 44 | 8,9  |
| 1714 | 0 | 0 |  | 0 | 1333 | 27,5 | 139 | 93  | 104 | 76  | 65  | 32 | 5    |
| 1715 | 0 | 0 |  | 0 | 923  | 30   | 177 | 101 | 122 | 58  | 114 | 55 | 6,6  |

|      |   |   |  |   |      |      |     |     |     |     |     |    |      |
|------|---|---|--|---|------|------|-----|-----|-----|-----|-----|----|------|
| 1716 | 0 | 0 |  | 1 | 905  | 32,5 | 153 | 110 | 114 | 106 | 79  | 37 | 8,3  |
| 1717 | 0 | 0 |  | 1 | 1435 | 32,5 | 150 | 100 | 112 | 86  | 63  | 36 | 5,4  |
| 1718 | 0 | 0 |  | 0 | 1485 | 37,5 | 159 | 93  | 108 | 65  | 141 | 65 | 9,2  |
| 1719 | 0 | 0 |  | 1 | 1780 | 47,5 | 169 | 108 | 124 | 88  | 67  | 36 | 5,9  |
| 1720 | 0 | 0 |  | 0 | 1652 | 57,5 | 164 | 98  | 117 | 99  | 61  | 31 | 6,1  |
| 1721 | 0 | 0 |  | 0 | 2127 | 60   | 141 | 98  | 109 | 97  | 88  | 45 | 8,6  |
| 1722 | 0 | 0 |  | 1 | 1542 | 75   | 136 | 85  | 95  | 106 | 85  | 47 | 9    |
| 1723 | 0 | 0 |  | 1 | 1560 | 90   | 132 | 85  | 98  | 116 | 70  | 43 | 8,1  |
| 1724 | 0 | 0 |  | 1 | 741  | 25   | 155 | 94  | 110 | 101 | 94  | 46 | 9,6  |
| 1725 | 0 | 0 |  | 1 | 1783 | 30   | 163 | 110 | 123 | 90  | 38  | 23 | 3,4  |
| 1726 | 0 | 0 |  | 1 | 1800 | 50   | 136 | 85  | 97  | 80  | 111 | 59 | 8,9  |
| 1727 | 0 | 0 |  | 1 | 1370 | 30   | 119 | 85  | 94  | 84  | 45  | 30 | 3,8  |
| 1728 | 0 | 0 |  | 0 | 2185 | 27,5 | 143 | 105 | 116 | 116 | 55  | 26 | 6,3  |
| 1729 | 0 | 0 |  | 0 | 923  | 12,5 | 166 | 107 | 117 | 74  | 76  | 38 | 5,6  |
| 1730 | 0 | 0 |  | 1 | 1130 | 2,5  | 132 | 92  | 102 | 106 | 49  | 27 | 5,2  |
| 1731 | 0 | 0 |  | 1 | 510  | 2,5  | 141 | 98  | 110 | 94  | 72  | 41 | 6,7  |
| 1732 | 0 | 0 |  | 0 | 1460 | 2,5  | 138 | 97  | 108 | 109 | 65  | 35 | 7,1  |
| 1733 | 0 | 0 |  | 0 | 1460 | 2,5  | 124 | 90  | 100 | 96  | 67  | 36 | 6,4  |
| 1734 | 0 | 0 |  | 1 | 1670 | 15   | 164 | 101 | 119 | 85  | 55  | 34 | 4,7  |
| 1735 | 0 | 0 |  | 0 | 992  | 45   | 110 | 77  | 87  | 84  | 98  |    | 8,2  |
| 1736 | 0 | 0 |  | 1 | 1125 | 17,5 | 144 | 77  | 91  | 75  | 68  | 38 | 5    |
| 1737 | 0 | 0 |  | 1 | 1580 | 10   | 117 | 83  | 93  | 94  | 91  | 45 | 8,6  |
| 1738 | 0 | 0 |  | 1 | 1580 | 10   | 122 | 81  | 91  | 116 | 73  | 38 | 8,4  |
| 1739 | 0 | 0 |  | 1 | 1580 | 10   | 109 | 76  | 86  | 107 | 83  | 43 | 8,9  |
| 1740 | 0 | 0 |  | 1 | 1845 | 52,5 | 135 | 90  | 100 | 87  | 108 | 51 | 9,3  |
| 1741 | 0 | 0 |  | 1 | 1845 | 52,5 | 156 | 101 | 110 | 79  | 101 | 49 | 7,9  |
| 1742 | 0 | 0 |  | 1 | 1845 | 52,5 | 152 | 100 | 110 | 75  | 94  | 47 | 7    |
| 1743 | 0 | 0 |  | 0 | 2900 | 97,5 | 123 | 83  | 92  | 80  | 86  | 47 | 6,9  |
| 1744 | 0 | 0 |  | 0 | 2764 | 95   | 141 | 97  | 107 | 147 | 109 | 40 | 16,1 |
| 1745 | 0 | 0 |  | 1 | 680  | 12,5 | 159 | 101 | 112 | 59  | 110 | 58 | 6,5  |
| 1746 | 0 | 0 |  | 0 | 500  | 0    | 115 | 83  | 92  | 116 | 60  | 33 | 6,9  |
| 1747 | 0 | 0 |  | 0 | 500  | 0    | 163 | 121 | 133 | 95  | 68  | 35 | 6,4  |
| 1748 | 0 | 0 |  | 1 | 1914 | 57,5 | 153 | 102 | 115 | 106 | 63  | 30 | 6,7  |

|      |   |   |   |   |   |      |      |     |     |     |     |     |    |      |
|------|---|---|---|---|---|------|------|-----|-----|-----|-----|-----|----|------|
| 1749 | 0 | 0 |   |   | 1 | 994  | 32,5 | 172 | 113 | 128 | 90  | 63  | 37 | 5,7  |
| 1750 | 0 | 0 |   |   | 1 | 1280 | 7,5  | 171 | 97  | 107 | 87  | 63  | 35 | 5,5  |
| 1751 | 0 | 0 |   | 2 | 1 | 1300 | 2,5  | 149 | 82  | 102 | 79  | 90  | 50 | 7,1  |
| 1752 | 0 | 0 |   | 2 | 1 | 1300 | 2,5  | 157 | 113 | 124 | 82  | 74  | 42 | 6,1  |
| 1753 | 0 | 0 | 0 | 1 | 0 | 1477 | 7,5  | 110 | 71  | 83  | 87  | 70  |    | 6,1  |
| 1754 | 0 | 0 | 0 | 0 | 1 | 595  | 5    | 180 | 115 | 132 | 102 | 53  | 30 | 5,4  |
| 1755 | 0 | 0 | 0 | 0 | 1 | 595  | 5    | 141 | 104 | 115 | 102 | 61  | 36 | 6,2  |
| 1756 | 0 | 0 |   | 0 | 1 | 1850 | 95   | 188 | 129 | 143 | 110 | 59  | 31 | 6,5  |
| 1757 | 0 | 0 |   | 0 | 1 | 1850 | 95   | 174 | 114 | 129 | 135 | 51  | 26 | 7    |
| 1758 | 0 | 0 |   | 0 | 0 | 1477 | 2,5  | 155 | 102 | 114 | 96  | 62  |    | 5,9  |
| 1759 | 0 | 0 |   | 0 | 0 | 600  | 2,5  | 172 | 105 | 122 | 102 | 71  |    | 7,2  |
| 1760 | 0 | 0 |   | 0 | 1 | 440  | 2,5  | 141 | 100 | 111 | 88  | 72  |    | 6,3  |
| 1761 | 0 | 0 |   | 0 | 1 | 1333 | 5    | 132 | 90  | 101 | 80  | 83  |    | 6,6  |
| 1762 | 0 | 0 |   | 0 | 1 | 1374 | 5    | 158 | 103 | 117 | 77  | 105 |    | 8,1  |
| 1763 | 0 | 0 |   | 0 | 0 | 1295 | 5    | 152 | 96  | 112 | 93  | 67  |    | 6,2  |
| 1764 | 0 | 0 |   | 0 | 0 | 630  | 7,5  | 146 | 108 | 116 | 98  | 109 |    | 10,7 |
| 1765 | 0 | 0 |   | 0 | 0 | 1425 | 10   | 168 | 110 | 122 | 107 | 90  |    | 9,5  |
| 1766 | 0 | 0 |   | 0 | 1 | 1465 | 10   | 157 | 108 | 121 | 96  | 64  |    | 6,1  |
| 1767 | 0 | 0 |   | 0 | 1 | 1185 | 10   | 131 | 88  | 99  | 64  | 110 |    | 7,1  |
| 1768 | 0 | 0 |   | 0 | 0 | 1175 | 12,5 | 153 | 104 | 117 | 94  | 75  |    | 7    |
| 1769 | 0 | 0 |   | 0 | 1 | 1610 | 25   | 148 | 100 | 112 | 99  | 65  |    | 6,4  |
| 1770 | 0 | 0 |   | 0 | 0 | 1930 | 30   | 148 | 102 | 113 | 114 | 81  |    | 9,2  |
| 1771 | 0 | 0 |   | 0 | 0 | 1920 | 32,5 | 134 | 98  | 108 | 87  | 86  |    | 7,5  |
| 1772 | 0 | 0 |   | 0 | 1 | 747  | 35   | 185 | 104 | 127 | 78  | 67  |    | 5,2  |
| 1773 | 0 | 0 |   | 0 | 1 | 1603 | 37,5 | 164 | 101 | 118 | 79  | 136 |    | 10,8 |
| 1774 | 0 | 0 |   | 0 | 0 | 992  | 45   | 146 | 92  | 105 | 67  | 99  |    | 6,7  |
| 1775 | 0 | 0 |   | 0 | 1 | 843  | 57,5 | 173 | 110 | 126 | 106 | 68  |    | 7,2  |
| 1776 | 0 | 0 |   | 0 | 1 | 1334 | 62,5 | 139 | 85  | 99  | 90  | 76  |    | 6,9  |
| 1777 | 0 | 0 |   | 0 | 1 | 2010 | 65   | 166 | 108 | 122 | 99  | 63  |    | 6,2  |
| 1778 | 0 | 0 |   | 0 | 1 | 1150 | 87,5 | 172 | 118 | 130 | 77  | 67  |    | 5,2  |
| 1779 | 0 | 0 |   | 0 |   | 320  | 0    | 180 | 114 | 126 | 92  | 80  |    | 7,3  |
| 1780 | 0 | 0 |   | 0 | 0 | 1920 | 30   | 159 | 97  | 113 | 113 | 71  |    | 8,1  |
| 1781 | 0 | 0 |   | 0 | 0 | 1730 | 30   | 177 | 121 | 136 | 104 | 75  |    | 7,8  |

|      |   |   |   |   |      |      |     |     |     |     |     |    |      |
|------|---|---|---|---|------|------|-----|-----|-----|-----|-----|----|------|
| 1782 | 0 | 0 | 0 | 1 | 1360 | 22,5 | 173 | 104 | 119 | 101 | 90  |    | 9    |
| 1783 | 0 | 0 | 1 | 1 | 720  | 22,5 | 166 | 103 | 118 | 87  | 91  |    | 7,9  |
| 1784 | 0 | 0 | 1 | 1 | 1439 | 50   | 142 | 96  | 109 | 93  | 121 |    | 11,1 |
| 1785 | 0 | 0 |   | 1 | 550  | 7,5  | 115 | 67  | 76  | 86  | 93  | 49 | 7,9  |
| 1786 | 0 | 0 |   | 1 | 550  | 7,5  | 122 | 76  | 88  | 95  | 86  | 45 | 8,1  |
| 1787 | 0 | 0 |   | 0 | 1480 | 2,5  | 124 | 88  | 94  | 87  | 81  | 46 | 7,1  |
| 1788 | 0 | 0 |   | 0 | 2240 | 2,5  | 167 | 125 | 136 | 99  | 64  | 33 | 6,4  |
| 1789 | 0 | 0 |   | 1 | 1489 | 2,5  | 135 | 98  | 108 | 85  | 62  | 35 | 5,2  |
| 1790 | 0 | 0 |   | 0 | 1760 | 2,5  | 145 | 98  | 110 | 84  | 78  | 43 | 6,5  |
| 1791 | 0 | 0 |   | 1 | 2145 | 2,5  | 141 | 98  | 109 | 82  | 89  | 44 | 7,3  |
| 1792 | 0 | 0 |   | 1 | 2505 | 2,5  | 135 | 99  | 110 | 69  | 75  | 43 | 5,2  |
| 1793 | 0 | 0 |   | 1 | 2750 | 5    | 155 | 100 | 113 | 81  | 77  | 40 | 6,3  |
| 1794 | 0 | 0 |   | 0 | 2355 | 5    | 149 | 96  | 112 | 87  | 77  | 41 | 6,7  |
| 1795 | 0 | 0 |   | 1 | 1760 | 5    | 135 | 96  | 107 | 92  | 74  | 40 | 6,8  |
| 1796 | 0 | 0 |   | 1 | 2770 | 5    | 184 | 115 | 131 | 78  | 116 | 54 | 9,1  |
| 1797 | 0 | 0 |   | 1 | 2790 | 7,5  | 117 | 85  | 94  | 101 | 61  | 35 | 6,2  |
| 1798 | 0 | 0 |   | 0 | 2355 | 7,5  | 132 | 96  | 105 | 93  | 54  | 33 | 5    |
| 1799 | 0 | 0 |   | 0 | 2235 | 10   | 163 | 108 | 123 | 88  | 52  | 33 | 4,6  |
| 1800 | 0 | 0 |   | 1 | 2920 | 12,5 | 142 | 90  | 98  | 81  | 81  | 47 | 6,5  |
| 1801 | 0 | 0 |   | 0 | 2730 | 12,5 | 147 | 92  | 105 | 90  | 107 | 54 | 9,6  |
| 1802 | 0 | 0 |   | 1 | 2930 | 15   | 127 | 92  | 101 | 98  | 58  | 34 | 5,7  |
| 1803 | 0 | 0 |   | 1 | 2740 | 17,5 | 130 | 90  | 100 | 92  | 88  | 45 | 8,1  |
| 1804 | 0 | 0 |   | 1 | 2915 | 20   | 165 | 108 | 122 | 78  | 91  | 49 | 7    |
| 1805 | 0 | 0 |   | 1 | 2350 | 20   | 128 | 89  | 100 | 93  | 76  | 44 | 7    |
| 1806 | 0 | 0 |   | 0 | 2865 | 20   | 155 | 102 | 113 | 70  | 86  | 44 | 6,1  |
| 1807 | 0 | 0 |   | 0 | 2640 | 20   | 158 | 98  | 112 | 90  | 99  | 48 | 8,9  |
| 1808 | 0 | 0 |   | 1 | 2800 | 22,5 | 167 | 108 | 122 | 93  | 73  | 41 | 6,8  |
| 1809 | 0 | 0 |   | 1 | 2320 | 32,5 | 130 | 93  | 101 | 68  | 131 | 74 | 9    |
| 1810 | 0 | 0 |   | 0 | 3370 | 37,5 | 136 | 98  | 109 | 91  | 70  | 40 | 6,4  |
| 1811 | 0 | 0 |   | 0 | 3250 | 42,5 | 139 | 103 | 113 | 112 | 61  | 34 | 6,9  |
| 1812 | 0 | 0 |   | 1 | 3140 | 42,5 | 167 | 115 | 127 | 84  | 136 | 62 | 11,5 |
| 1813 | 0 | 0 |   | 1 | 3160 | 45   | 135 | 95  | 106 | 86  | 83  | 48 | 7,1  |
| 1814 | 0 | 0 |   | 1 | 3055 | 47,5 | 156 | 86  | 105 | 104 | 56  | 29 | 5,9  |

|      |   |   |   |   |      |      |     |     |     |     |     |    |     |
|------|---|---|---|---|------|------|-----|-----|-----|-----|-----|----|-----|
| 1815 | 0 | 0 |   | 0 | 3080 | 47,5 | 138 | 94  | 105 | 84  | 84  | 45 | 7,1 |
| 1816 | 0 | 0 |   | 1 | 2860 | 50   | 166 | 111 | 124 | 90  | 43  | 29 | 3,9 |
| 1817 | 0 | 0 |   | 0 | 3230 | 55   | 136 | 84  | 95  | 112 | 79  | 43 | 8,8 |
| 1818 | 0 | 0 |   | 0 | 3445 | 60   | 144 | 97  | 110 | 82  | 67  | 39 | 5,5 |
| 1819 | 0 | 0 |   | 0 | 3510 | 67,5 | 116 | 83  | 91  | 102 | 86  | 44 | 8,7 |
| 1820 | 0 | 0 |   | 1 | 3475 | 77,5 | 165 | 117 | 129 | 99  | 77  | 37 | 7,6 |
| 1821 | 0 | 0 |   | 1 | 3155 | 77,5 | 152 | 103 | 116 | 84  | 101 | 48 | 8,5 |
| 1822 | 0 | 0 |   | 0 | 3495 | 77,5 | 135 | 95  | 104 | 91  | 105 | 53 | 9,6 |
| 1823 | 0 | 0 |   | 0 | 3365 | 82,5 | 134 | 89  | 102 | 110 | 66  | 38 | 7,3 |
| 1824 | 0 | 0 |   | 0 | 2965 | 82,5 | 143 | 93  | 107 | 84  | 73  | 41 | 6,1 |
| 1825 | 0 | 0 |   | 0 | 3615 | 85   | 143 | 89  | 103 | 112 | 68  | 35 | 7,6 |
| 1826 | 0 | 0 |   | 0 | 3615 | 92,5 | 140 | 88  | 99  | 116 | 66  | 33 | 7,7 |
| 1827 | 0 | 0 |   | 0 | 3310 | 92,5 | 145 | 96  | 106 | 98  | 58  | 32 | 5,7 |
| 1828 | 0 | 0 |   | 0 | 3930 | 92,5 | 219 | 103 | 141 | 100 | 99  | 42 | 10  |
| 1829 | 0 | 0 |   | 1 | 3990 | 97,5 | 186 | 105 | 120 | 107 | 61  | 26 | 6,5 |
| 1830 | 0 | 0 |   | 1 | 4030 | 97,5 | 143 | 93  | 104 | 87  | 97  | 50 | 8,3 |
| 1831 | 0 | 0 |   | 1 | 4575 | 100  | 156 | 92  | 102 | 114 | 71  | 34 | 8,1 |
| 1832 | 0 | 0 |   | 1 | 2780 | 62,5 | 150 | 94  | 106 | 102 | 72  | 37 | 7,3 |
| 1833 | 0 | 0 | 0 | 0 | 3220 | 72,5 | 127 | 84  | 95  | 122 | 78  | 38 | 9,5 |
| 1834 | 0 | 0 | 0 | 0 | 3220 | 72,5 | 127 | 73  | 91  | 102 | 109 | 53 | 11  |
| 1835 | 0 | 0 |   | 0 | 4060 | 97,5 | 135 | 95  | 106 | 123 | 53  | 28 | 6,5 |
| 1836 | 0 | 0 |   | 0 | 3395 | 55   | 156 | 103 | 114 | 115 | 53  | 29 | 6,1 |
| 1837 | 0 | 0 |   | 1 | 1850 | 20   | 106 | 78  | 86  | 102 | 65  | 34 | 6,7 |
| 1838 | 0 | 0 |   | 0 | 3040 | 55   | 152 | 103 | 115 | 75  | 104 | 56 | 7,7 |
| 1839 | 0 | 0 |   | 0 | 3310 | 62,5 | 149 | 104 | 115 | 112 | 61  | 30 | 6,9 |
| 1840 | 0 | 0 |   | 0 | 3310 | 62,5 | 132 | 92  | 101 | 99  | 73  | 36 | 7,3 |
| 1841 | 0 | 0 |   | 1 | 2680 | 15   | 124 | 92  | 101 | 87  | 89  | 49 | 7,7 |
| 1842 | 0 | 0 |   | 0 | 3110 | 50   | 140 | 103 | 113 | 101 | 74  | 40 | 7,5 |
| 1843 | 0 | 0 |   | 0 | 3110 | 50   | 140 | 96  | 107 | 94  | 66  | 38 | 6,3 |
| 1844 | 0 | 0 |   | 0 | 2250 | 32,5 | 153 | 115 | 125 | 100 | 84  | 46 | 8,4 |
| 1845 | 0 | 0 |   | 1 | 1680 | 10   | 147 | 103 | 114 | 91  | 74  | 35 | 6,7 |
| 1846 | 0 | 0 |   | 1 | 3550 | 90   | 139 | 102 | 113 | 107 | 85  | 38 | 9   |
| 1847 | 0 | 0 |   | 1 | 2770 | 40   | 128 | 96  | 104 | 99  | 61  | 34 | 6   |

|      |   |   |  |   |      |      |     |     |     |     |     |    |      |
|------|---|---|--|---|------|------|-----|-----|-----|-----|-----|----|------|
| 1848 | 0 | 0 |  | 0 | 2825 | 22,5 | 118 | 76  | 86  | 106 | 82  | 42 | 8,7  |
| 1849 | 0 | 0 |  | 0 | 2825 | 22,5 | 140 | 91  | 103 | 83  | 88  | 44 | 7,3  |
| 1850 | 0 | 0 |  | 0 | 2595 | 10   | 139 | 97  | 108 | 99  | 55  | 31 | 5,5  |
| 1851 | 0 | 0 |  | 0 | 2595 | 10   | 130 | 88  | 98  | 110 | 48  | 29 | 5,2  |
| 1852 | 0 | 0 |  | 0 | 2005 | 2,5  | 140 | 93  | 104 | 110 | 80  | 43 | 8,9  |
| 1853 | 0 | 0 |  | 0 | 4168 | 87,5 | 169 | 105 | 123 | 78  | 131 | 60 | 10,3 |
| 1854 | 0 | 0 |  | 0 | 3310 | 45   | 113 | 86  | 94  | 88  | 71  | 43 | 6,3  |
| 1855 | 0 | 0 |  | 0 | 2350 | 7,5  | 148 | 100 | 111 | 101 | 70  | 38 | 7,1  |
| 1856 | 0 | 0 |  | 1 | 2010 | 40   | 125 | 88  | 98  | 88  | 67  | 42 | 5,8  |
| 1857 | 0 | 0 |  | 0 | 2280 | 37,5 | 153 | 110 | 124 | 89  | 91  | 44 | 8,1  |
| 1858 | 0 | 0 |  | 0 | 3215 | 52,5 | 134 | 94  | 104 | 85  | 95  | 48 | 8,1  |
| 1859 | 0 | 0 |  | 0 | 3785 | 97,5 | 158 | 103 | 116 | 109 | 59  | 33 | 6,5  |
| 1860 | 0 | 0 |  | 0 | 3785 | 97,5 | 121 | 90  | 100 | 90  | 75  | 43 | 6,8  |
| 1861 | 0 | 0 |  | 0 | 3785 | 97,5 | 131 | 86  | 99  | 89  | 68  | 40 | 6    |
| 1862 | 0 | 0 |  | 1 | 1865 | 5    | 153 | 100 | 115 | 77  | 57  | 33 | 4,3  |
| 1863 | 0 | 0 |  | 1 | 2910 | 30   | 143 | 103 | 114 | 109 | 61  | 37 | 6,7  |
| 1864 | 0 | 0 |  | 0 | 3520 | 40   | 158 | 98  | 116 | 104 | 76  | 35 | 7,8  |
| 1865 | 0 | 0 |  | 1 | 1920 | 2,5  | 125 | 87  | 97  | 99  | 78  | 44 | 7,7  |
| 1866 | 0 | 0 |  | 1 | 3680 | 80   | 177 | 109 | 124 | 88  | 78  | 39 | 6,9  |
| 1867 | 0 | 0 |  | 1 | 2405 | 20   | 130 | 85  | 96  | 103 | 72  | 43 | 7,4  |
| 1868 | 0 | 0 |  | 1 | 2980 | 60   | 143 | 91  | 103 | 119 | 58  | 30 | 6,9  |
| 1869 | 0 | 0 |  | 1 | 2511 | 32,5 | 164 | 113 | 123 | 106 | 63  | 33 | 6,6  |
| 1870 | 0 | 0 |  | 1 | 2910 | 55   | 177 | 116 | 131 | 94  | 119 | 63 | 11,3 |
| 1871 | 0 | 0 |  | 1 | 3110 | 72,5 | 108 | 77  | 86  | 128 | 62  | 32 | 7,9  |
| 1872 | 0 | 0 |  | 1 | 3445 | 60   | 140 | 95  | 107 | 89  | 92  | 44 | 8,2  |
| 1873 | 0 | 0 |  | 1 | 2825 | 45   | 185 | 110 | 126 | 127 | 83  | 36 | 10,6 |
| 1874 | 0 | 0 |  | 1 | 1642 | 10   | 144 | 91  | 103 | 85  | 82  | 44 | 7    |
| 1875 | 0 | 0 |  | 1 | 2640 | 62,5 | 124 | 95  | 104 | 100 | 58  | 33 | 5,7  |
| 1876 | 0 | 0 |  | 1 | 2640 | 62,5 | 113 | 75  | 85  | 91  | 76  | 46 | 6,9  |
| 1877 | 0 | 0 |  | 1 | 2640 | 62,5 | 129 | 79  | 89  | 69  | 92  | 58 | 6,3  |
| 1878 | 0 | 0 |  | 0 | 3750 | 85   | 172 | 102 | 115 | 116 | 104 | 42 | 12   |
| 1879 | 0 | 0 |  | 0 | 2545 | 22,5 | 160 | 109 | 121 | 87  | 85  | 44 | 7,4  |
| 1880 | 0 | 0 |  | 0 | 2570 | 15   | 174 | 100 | 111 | 99  | 78  | 45 | 7,7  |

|      |   |   |   |   |   |      |      |     |     |     |     |     |    |      |
|------|---|---|---|---|---|------|------|-----|-----|-----|-----|-----|----|------|
| 1881 | 0 | 0 |   |   | 0 | 2445 | 10   | 137 | 85  | 97  | 73  | 109 | 55 | 8    |
| 1882 | 0 | 0 |   |   | 1 | 3185 | 70   |     |     |     |     |     |    |      |
| 1883 | 0 | 0 |   |   | 1 | 3445 | 75   | 151 | 92  | 106 | 86  | 94  | 44 | 8    |
| 1884 | 0 | 0 |   |   | 1 | 2745 | 35   | 152 | 92  | 109 | 96  | 83  | 39 | 7,9  |
| 1885 | 0 | 0 |   |   | 0 | 2231 | 2,5  | 187 | 113 | 130 | 68  | 68  | 41 | 4,6  |
| 1886 | 0 | 0 | 0 |   | 0 | 3445 | 60   | 131 | 83  | 93  | 93  | 102 |    | 9,5  |
| 1887 | 0 | 0 |   |   | 1 | 3360 | 67,5 | 151 | 97  | 110 | 112 | 76  | 35 | 8,6  |
| 1888 | 0 | 0 |   |   | 0 | 4366 | 100  | 114 | 89  | 95  | 84  | 68  |    | 5,7  |
| 1889 | 0 | 0 | 0 |   | 1 | 1945 | 30   | 134 | 84  | 97  | 83  | 64  | 39 | 5,3  |
| 1890 | 0 | 0 | 0 |   | 1 | 1945 | 30   | 160 | 110 | 121 | 84  | 68  | 39 | 5,7  |
| 1891 | 0 | 0 | 0 |   | 1 | 1945 | 30   | 131 | 80  | 90  | 83  | 66  | 40 | 5,5  |
| 1892 | 0 | 0 | 0 | 1 | 1 | 2925 | 32,5 | 157 | 98  | 110 | 105 | 107 |    | 11,2 |
| 1893 | 0 | 0 | 0 | 1 | 1 | 3285 | 90   | 106 | 74  | 82  | 83  | 88  |    | 7,3  |
| 1894 | 0 | 0 | 1 | 0 | 0 | 3350 | 37,5 | 111 | 81  | 89  | 105 | 67  | 41 | 7    |
| 1895 | 0 | 0 | 1 | 0 | 0 | 3350 | 37,5 | 126 | 83  | 94  | 95  | 72  | 41 | 6,8  |
| 1896 | 0 | 0 | 1 | 0 | 0 | 3350 | 37,5 | 111 | 83  | 91  | 94  | 62  | 39 | 5,8  |
| 1897 | 0 | 0 | 0 | 0 | 1 | 3735 | 90   | 126 | 77  | 89  | 108 | 71  | 37 | 7,7  |
| 1898 | 0 | 0 | 0 | 0 | 1 | 3735 | 90   | 126 | 88  | 98  | 91  | 76  | 40 | 6,8  |
| 1899 | 0 | 0 | 0 | 0 | 1 | 3865 | 90   | 125 | 92  | 103 | 108 | 82  | 41 | 8,8  |
| 1900 | 0 | 0 | 0 | 0 | 1 | 3865 | 90   | 114 | 77  | 86  | 99  | 87  | 46 | 8,6  |
| 1901 | 0 | 0 | 0 | 0 | 1 | 3865 | 90   | 111 | 79  | 88  | 101 | 89  | 47 | 9    |
| 1902 | 0 | 0 | 1 | 0 | 1 | 2720 | 32,5 | 118 | 76  | 86  | 102 | 62  | 35 | 6,3  |
| 1903 | 0 | 0 | 1 | 0 | 1 | 2720 | 32,5 | 119 | 80  | 90  | 101 | 55  | 32 | 5,5  |
| 1904 | 0 | 0 | 1 | 0 | 1 | 2720 | 32,5 | 115 | 76  | 85  | 96  | 59  | 35 | 5,7  |
| 1905 | 0 | 0 | 2 | 0 | 1 | 2235 | 5    | 134 | 97  | 107 | 100 | 57  |    | 5,7  |
| 1906 | 0 | 0 | 0 | 0 | 1 | 2390 | 25   | 123 | 87  | 98  | 76  | 80  | 46 | 6,1  |
| 1907 | 0 | 0 | 0 | 0 | 1 | 2390 | 25   | 131 | 89  | 99  | 82  | 76  | 43 | 6,2  |
| 1908 | 0 | 0 | 0 | 0 | 1 | 2390 | 25   | 180 | 121 | 136 | 82  | 79  | 42 | 6,4  |
| 1909 | 0 | 0 |   |   | 0 | 2760 | 30   | 142 | 98  | 110 | 99  | 59  | 33 | 5,8  |
| 1910 | 0 | 0 |   |   | 0 | 2760 | 30   | 148 | 92  | 106 | 94  | 67  | 42 | 6,3  |
| 1911 | 0 | 0 |   |   | 0 | 2760 | 30   | 141 | 92  | 104 | 88  | 77  | 47 | 6,8  |
| 1912 | 0 | 0 |   |   | 0 | 2540 | 20   | 151 | 102 | 114 | 104 | 61  | 33 | 6,4  |
| 1913 | 0 | 0 |   |   | 0 | 2540 | 20   | 144 | 111 | 116 | 93  | 60  | 31 | 5,6  |



|      |   |   |   |   |   |      |      |     |     |     |     |     |    |      |
|------|---|---|---|---|---|------|------|-----|-----|-----|-----|-----|----|------|
| 1914 | 0 | 0 |   | 0 | 0 | 2540 | 20   | 145 | 100 | 110 | 97  | 65  | 37 | 6,3  |
| 1915 | 0 | 0 | 0 | 0 | 1 | 2660 | 7,5  | 100 | 64  | 74  | 98  | 62  | 43 | 6,1  |
| 1916 | 0 | 0 | 0 | 0 | 1 | 2645 | 20   | 146 | 97  | 111 | 91  | 69  | 37 | 6,3  |
| 1917 | 0 | 0 | 0 | 0 | 1 | 2645 | 20   | 115 | 83  | 92  | 76  | 85  | 48 | 6,4  |
| 1918 | 0 | 0 | 0 | 0 | 1 | 2645 | 20   | 105 | 72  | 81  | 76  | 78  | 44 | 5,9  |
| 1919 | 0 | 0 | 0 | 0 | 1 | 2970 | 77,5 | 126 | 73  | 87  | 91  | 116 |    | 10,5 |
| 1920 | 0 | 0 | 0 | 0 | 1 | 2790 | 65   | 109 | 69  | 79  | 92  | 83  | 48 | 7,6  |
| 1921 | 0 | 0 | 0 | 0 | 1 | 2790 | 65   | 103 | 73  | 81  | 84  | 74  | 45 | 6,2  |
| 1922 | 0 | 0 | 0 | 0 | 0 | 4285 | 100  | 127 | 79  | 90  | 90  | 131 | 59 | 11,8 |
| 1923 | 0 | 0 | 0 | 0 | 0 | 2980 | 37,5 | 122 | 85  | 96  | 117 | 87  | 40 | 10,2 |
| 1924 | 0 | 0 | 0 | 0 | 0 | 2980 | 37,5 | 156 | 101 | 116 | 101 | 102 | 48 | 10,3 |
| 1925 | 0 | 0 | 0 | 0 | 0 | 2980 | 37,5 | 123 | 86  | 97  | 87  | 102 | 50 | 8,9  |
| 1926 | 0 | 0 | 1 | 0 | 0 | 3425 | 72,5 | 156 | 82  | 96  | 102 | 85  | 39 | 8,7  |
| 1927 | 0 | 0 | 1 | 0 | 0 | 3425 | 72,5 | 140 | 81  | 91  | 93  | 83  | 40 | 7,8  |
| 1928 | 0 | 0 | 0 | 0 | 1 | 3645 | 77,5 | 117 | 82  | 91  | 89  | 74  | 38 | 6,6  |
| 1929 | 0 | 0 | 0 | 0 | 1 | 3645 | 77,5 | 117 | 82  | 91  | 89  | 74  | 38 | 6,6  |
| 1930 | 0 | 0 | 1 | 0 | 1 | 2420 | 42,5 | 171 | 108 | 122 | 83  | 98  | 52 | 8,2  |
| 1931 | 0 | 0 | 1 | 0 | 1 | 2420 | 42,5 | 155 | 100 | 115 | 73  | 109 | 57 | 7,9  |
| 1932 | 0 | 0 | 1 | 0 | 1 | 2420 | 42,5 | 165 | 104 | 121 | 84  | 146 | 76 | 12,3 |
| 1933 | 0 | 0 | 1 | 0 | 0 | 3785 | 77,5 | 124 | 78  | 89  | 85  | 72  |    | 6,1  |
| 1934 | 0 | 0 | 0 | 0 | 1 | 2105 | 15   | 122 | 88  | 98  | 100 | 84  |    | 8,3  |
| 1935 | 0 | 1 | 0 | 0 | 0 | 3355 | 82,5 | 118 | 79  | 90  | 80  | 93  |    | 7,5  |
| 1936 | 0 | 0 |   | 0 | 1 | 3920 | 100  | 151 | 91  | 107 | 85  | 139 |    | 11,9 |
| 1937 | 0 | 0 |   | 0 | 0 | 2620 | 35   | 136 | 93  | 103 | 76  | 106 |    | 8,1  |
| 1938 | 0 | 0 |   | 0 | 0 | 2940 | 27,5 | 153 | 97  | 111 | 113 | 71  |    | 8,1  |
| 1939 | 0 | 0 |   | 0 | 1 | 2015 | 2,5  | 133 | 93  | 103 | 80  | 86  |    | 6,9  |
| 1940 | 0 | 0 |   | 0 | 1 | 1537 | 2,5  | 153 | 114 | 120 | 94  | 70  |    | 6,5  |
| 1941 | 0 | 0 |   | 0 | 1 | 2645 | 5    | 183 | 108 | 120 | 94  | 88  |    | 8,3  |
| 1942 | 0 | 0 |   | 0 | 0 | 1795 | 5    | 133 | 91  | 102 | 82  | 74  |    | 6    |
| 1943 | 0 | 0 |   | 0 | 0 | 2225 | 5    | 149 | 95  | 108 | 103 | 59  |    | 6,2  |
| 1944 | 0 | 0 |   | 0 | 0 | 2200 | 7,5  | 136 | 99  | 110 | 97  | 62  |    | 6    |
| 1945 | 0 | 0 |   | 0 | 1 | 2385 | 10   | 144 | 97  | 107 | 94  | 69  |    | 6,5  |
| 1946 | 0 | 0 |   | 0 | 0 | 2700 | 10   | 138 | 92  | 102 | 86  | 98  |    | 8,4  |

|      |   |   |   |   |      |      |     |     |     |     |     |  |      |
|------|---|---|---|---|------|------|-----|-----|-----|-----|-----|--|------|
| 1947 | 0 | 0 | 0 | 1 | 1943 | 10   | 186 | 126 | 141 | 76  | 109 |  | 8,3  |
| 1948 | 0 | 0 | 0 | 0 | 2640 | 12,5 | 157 | 102 | 114 | 98  | 80  |  | 7,9  |
| 1949 | 0 | 0 | 0 | 0 | 2730 | 12,5 | 131 | 94  | 104 | 90  | 67  |  | 6    |
| 1950 | 0 | 0 | 0 | 0 | 3085 | 12,5 | 143 | 96  | 108 | 91  | 106 |  | 9,6  |
| 1951 | 0 | 0 | 0 | 0 | 1855 | 12,5 | 139 | 90  | 102 | 80  | 93  |  | 7,3  |
| 1952 | 0 | 0 | 0 | 1 | 1802 | 17,5 | 180 | 119 | 133 | 76  | 82  |  | 6,2  |
| 1953 | 0 | 0 | 0 | 1 | 2755 | 17,5 | 166 | 109 | 121 | 94  | 51  |  | 4,7  |
| 1954 | 0 | 0 | 0 | 1 | 2930 | 20   | 143 | 102 | 113 | 81  | 61  |  | 4,9  |
| 1955 | 0 | 0 | 0 | 0 | 2865 | 20   | 158 | 100 | 110 | 82  | 73  |  | 6    |
| 1956 | 0 | 0 | 0 | 0 | 3260 | 25   | 128 | 93  | 103 | 85  | 115 |  | 9,9  |
| 1957 | 0 | 0 | 0 | 0 | 2520 | 25   | 190 | 109 | 130 | 88  | 128 |  | 11,2 |
| 1958 | 0 | 0 | 0 | 0 | 3000 | 30   | 127 | 92  | 102 | 84  | 103 |  | 8,6  |
| 1959 | 0 | 0 | 0 | 1 | 2465 | 30   | 150 | 109 | 119 | 78  | 97  |  | 7,6  |
| 1960 | 0 | 0 | 0 | 1 | 2925 | 32,5 | 196 | 112 | 132 | 125 | 84  |  | 10,5 |
| 1961 | 0 | 0 | 0 | 0 | 2465 | 35   | 149 | 86  | 102 | 120 | 83  |  | 10   |
| 1962 | 0 | 0 | 0 | 0 | 3355 | 35   | 131 | 90  | 102 | 93  | 57  |  | 5,3  |
| 1963 | 0 | 0 | 0 | 1 | 3240 | 40   | 134 | 92  | 103 | 113 | 71  |  | 8    |
| 1964 | 0 | 0 | 0 | 1 | 3260 | 42,5 | 172 | 98  | 114 | 104 | 97  |  | 10,1 |
| 1965 | 0 | 0 | 0 | 0 | 2720 | 45   | 199 | 119 | 141 | 106 | 37  |  | 3,9  |
| 1966 | 0 | 0 | 0 | 1 | 2345 | 50   | 151 | 97  | 111 | 98  | 44  |  | 4,4  |
| 1967 | 0 | 0 | 0 | 1 | 2875 | 60   | 165 | 101 | 116 | 89  | 159 |  | 14,2 |
| 1968 | 0 | 0 | 0 | 1 | 2235 | 62,5 | 150 | 92  | 107 | 101 | 88  |  | 8,9  |
| 1969 | 0 | 0 | 0 | 0 | 3305 | 62,5 | 166 | 102 | 117 | 77  | 138 |  | 10,6 |
| 1970 | 0 | 0 | 0 | 0 | 3705 | 70   | 160 | 107 | 120 | 73  | 91  |  | 6,6  |
| 1971 | 0 | 0 | 0 | 0 | 3440 | 72,5 | 143 | 98  | 110 | 87  | 87  |  | 7,5  |
| 1972 | 0 | 0 | 0 | 0 | 3640 | 77,5 | 168 | 103 | 119 | 104 | 91  |  | 9,5  |
| 1973 | 0 | 0 | 0 | 1 | 2970 | 77,5 | 146 | 97  | 108 | 94  | 126 |  | 11,8 |
| 1974 | 0 | 0 | 0 | 1 | 3715 | 80   | 161 | 105 | 121 | 97  | 124 |  | 12,1 |
| 1975 | 0 | 0 | 0 | 0 | 3670 | 80   | 153 | 111 | 120 | 109 | 119 |  | 13   |
| 1976 | 0 | 0 | 0 | 0 | 4175 | 90   | 168 | 104 | 118 | 83  | 88  |  | 7,3  |
| 1977 | 0 | 0 | 0 | 1 | 3940 | 92,5 | 124 | 84  | 95  | 90  | 114 |  | 10,2 |
| 1978 | 0 | 0 | 0 | 0 | 3780 | 92,5 | 180 | 122 | 134 | 100 | 84  |  | 8,4  |
| 1979 | 0 | 0 | 0 | 0 | 3535 | 95   | 127 | 96  | 105 | 93  | 96  |  | 9    |

|      |   |   |   |   |      |      |     |     |     |     |     |    |      |
|------|---|---|---|---|------|------|-----|-----|-----|-----|-----|----|------|
| 1980 | 0 | 0 | 0 | 0 | 3885 | 95   | 151 | 101 | 115 | 107 | 86  |    | 9,2  |
| 1981 | 0 | 0 | 0 | 1 | 3735 | 100  | 168 | 113 | 127 | 82  | 110 |    | 9,1  |
| 1982 | 0 | 0 | 0 | 1 | 2870 | 50   | 133 | 98  | 108 | 76  | 76  |    | 5,7  |
| 1983 | 0 | 0 | 0 | 1 | 1650 | 2,5  | 124 | 90  | 100 | 93  | 99  |    | 9,2  |
| 1984 | 0 | 0 | 0 | 1 | 2175 | 22,5 | 188 | 124 | 139 | 84  | 79  |    | 6,6  |
| 1985 | 0 | 0 | 0 | 1 | 2855 | 70   | 150 | 97  | 112 | 90  | 91  |    | 8,2  |
| 1986 | 0 | 0 | 1 | 0 | 1858 | 12,5 | 157 | 99  | 113 | 101 | 60  |    | 6,1  |
| 1987 | 0 | 0 | 1 | 0 | 3060 | 22,5 | 164 | 114 | 127 | 103 | 82  |    | 8,4  |
| 1988 | 0 | 0 | 1 | 0 | 2535 | 27,5 | 142 | 103 | 114 | 81  | 101 |    | 8,2  |
| 1989 | 1 | 0 |   | 1 | 2320 | 15   | 110 | 74  | 83  | 98  | 107 | 58 | 10,5 |
| 1990 | 1 | 0 |   | 1 | 2320 | 15   | 116 | 78  | 88  | 88  | 94  | 52 | 8,2  |
| 1991 | 0 | 0 |   | 0 | 3170 | 17,5 | 115 | 77  | 87  | 80  | 97  | 53 | 7,7  |
| 1992 | 0 | 0 |   | 0 | 3170 | 17,5 | 105 | 73  | 83  | 87  | 89  | 49 | 7,8  |
| 1993 | 0 | 0 |   | 1 | 3240 | 27,5 | 113 | 71  | 81  | 112 | 67  | 38 | 7,4  |
| 1994 | 0 | 0 |   | 1 | 3240 | 27,5 | 108 | 74  | 84  | 113 | 68  | 37 | 7,7  |
| 1995 | 0 | 0 |   | 0 | 3430 | 57,5 | 149 | 89  | 100 | 117 | 59  | 30 | 6,8  |
| 1996 | 0 | 0 |   | 0 | 3430 | 57,5 | 108 | 81  | 89  | 103 | 73  | 38 | 7,5  |
| 1997 | 0 | 0 |   | 0 | 3660 | 65   | 136 | 87  | 97  | 128 | 66  | 38 | 8,4  |
| 1998 | 0 | 0 |   | 1 | 3630 | 77,5 | 124 | 82  | 93  | 93  | 86  | 43 | 8    |
| 1999 | 0 | 0 |   | 1 | 3205 | 80   | 108 | 72  | 81  | 84  | 77  | 49 | 6,5  |
| 2000 | 0 | 0 |   | 1 | 3205 | 80   | 117 | 78  | 87  | 87  | 80  | 51 | 6,9  |
| 2001 | 0 | 0 |   | 1 | 3880 | 90   | 101 | 66  | 75  | 117 | 69  | 37 | 8,1  |
| 2002 | 0 | 0 |   | 1 | 3880 | 90   | 125 | 84  | 93  | 95  | 70  | 38 | 6,6  |
| 2003 | 0 | 0 |   | 0 | 2680 | 22,5 | 111 | 80  | 88  | 102 | 90  | 42 | 9,1  |
| 2004 | 0 | 0 |   | 0 | 2680 | 22,5 | 123 | 86  | 95  | 95  | 99  | 46 | 9,4  |
| 2005 | 0 | 0 |   | 0 | 495  | 0    | 152 | 104 | 117 | 99  | 58  | 34 | 5,7  |
| 2006 | 0 | 0 |   | 0 | 2100 | 2,5  | 158 | 109 | 121 | 104 | 61  | 39 | 6,4  |
| 2007 | 0 | 0 |   | 1 | 2515 | 2,5  | 126 | 84  | 96  | 122 | 86  | 42 | 10,4 |
| 2008 | 0 | 0 |   | 1 | 2515 | 2,5  | 146 | 91  | 106 | 109 | 91  | 42 | 9,9  |
| 2009 | 0 | 0 |   | 0 | 2530 | 5    | 144 | 98  | 110 | 94  | 56  | 36 | 5,2  |
| 2010 | 0 | 0 |   | 1 | 2575 | 5    | 138 | 101 | 112 | 78  | 88  | 48 | 6,9  |
| 2011 | 0 | 0 |   | 0 | 2275 | 7,5  | 132 | 91  | 101 | 109 | 53  | 32 | 5,8  |
| 2012 | 0 | 0 |   | 1 | 950  | 12,5 | 124 | 93  | 103 | 102 | 102 | 46 | 10,5 |

|      |   |   |  |  |   |      |      |     |     |     |     |     |    |      |
|------|---|---|--|--|---|------|------|-----|-----|-----|-----|-----|----|------|
| 2013 | 0 | 0 |  |  | 1 | 2985 | 12,5 | 116 | 83  | 92  | 75  | 94  | 53 | 7    |
| 2014 | 0 | 0 |  |  | 1 | 2700 | 15   | 149 | 100 | 114 | 98  | 69  | 40 | 6,7  |
| 2015 | 0 | 0 |  |  | 1 | 2935 | 15   | 158 | 100 | 113 | 111 | 106 | 48 | 11,8 |
| 2016 | 0 | 0 |  |  | 1 | 2770 | 15   | 142 | 95  | 107 | 90  | 67  | 36 | 6,1  |
| 2017 | 0 | 0 |  |  | 1 | 2995 | 17,5 | 130 | 87  | 96  | 139 | 45  | 25 | 6,2  |
| 2018 | 0 | 0 |  |  | 0 | 2820 | 17,5 | 124 | 90  | 100 | 87  | 62  | 37 | 5,4  |
| 2019 | 0 | 0 |  |  | 1 | 2910 | 20   | 135 | 96  | 105 | 88  | 66  | 35 | 5,8  |
| 2020 | 0 | 0 |  |  | 1 | 2150 | 22,5 | 166 | 114 | 125 | 77  | 95  | 46 | 7,5  |
| 2021 | 0 | 0 |  |  | 1 | 3080 | 25   | 153 | 97  | 112 | 117 | 69  | 41 | 8,1  |
| 2022 | 0 | 0 |  |  | 1 | 2965 | 25   | 152 | 102 | 114 | 100 | 54  | 34 | 5,4  |
| 2023 | 0 | 0 |  |  | 0 | 2735 | 25   | 144 | 101 | 113 | 95  | 50  | 32 | 4,8  |
| 2024 | 0 | 0 |  |  | 1 | 3140 | 27,5 | 165 | 99  | 111 | 105 | 75  | 37 | 7,7  |
| 2025 | 0 | 0 |  |  | 1 | 2740 | 30   | 160 | 109 | 123 | 98  | 68  | 36 | 6,7  |
| 2026 | 0 | 0 |  |  | 1 | 2990 | 32,5 | 146 | 98  | 109 | 77  | 109 | 59 | 8,5  |
| 2027 | 0 | 0 |  |  | 0 | 3325 | 32,5 | 157 | 103 | 116 | 106 | 105 | 47 | 11,1 |
| 2028 | 0 | 0 |  |  | 0 | 2850 | 35   | 133 | 95  | 104 | 84  | 90  | 44 | 7,6  |
| 2029 | 0 | 0 |  |  | 1 | 3260 | 42,5 | 112 | 76  | 85  | 105 | 66  | 36 | 7    |
| 2030 | 0 | 0 |  |  | 0 | 3450 | 45   | 148 | 101 | 112 | 96  | 74  | 37 | 7,2  |
| 2031 | 0 | 0 |  |  | 0 | 3685 | 45   | 141 | 104 | 114 | 116 | 76  | 36 | 8,8  |
| 2032 | 0 | 0 |  |  | 1 | 3330 | 47,5 | 140 | 91  | 107 | 93  | 96  | 49 | 8,9  |
| 2033 | 0 | 0 |  |  | 1 | 2835 | 47,5 | 153 | 112 | 121 | 89  | 58  | 32 | 5,2  |
| 2034 | 0 | 0 |  |  | 1 | 2970 | 50   | 164 | 105 | 122 | 112 | 92  | 46 | 10,4 |
| 2035 | 0 | 0 |  |  | 1 | 3330 | 50   | 165 | 96  | 114 | 98  | 71  | 36 | 6,9  |
| 2036 | 0 | 0 |  |  | 0 | 3130 | 52,5 |     |     |     |     |     |    |      |
| 2037 | 0 | 0 |  |  | 0 | 3130 | 52,5 | 109 | 77  | 86  | 98  | 122 | 49 | 12,1 |
| 2038 | 0 | 0 |  |  | 1 | 2745 | 60   | 136 | 90  | 101 | 112 | 53  | 32 | 6    |
| 2039 | 0 | 0 |  |  | 1 | 3215 | 65   | 136 | 98  | 108 | 97  | 57  | 29 | 5,6  |
| 2040 | 0 | 0 |  |  | 0 | 3660 | 65   | 147 | 92  | 102 | 141 | 40  | 19 | 5,6  |
| 2041 | 0 | 0 |  |  | 0 | 3560 | 70   | 158 | 108 | 121 | 99  | 70  | 31 | 7,1  |
| 2042 | 0 | 0 |  |  | 1 | 3695 | 80   | 146 | 89  | 101 | 125 | 55  | 24 | 7,6  |
| 2043 | 0 | 0 |  |  | 0 | 3840 | 80   | 141 | 94  | 105 | 97  | 102 | 47 | 9,9  |
| 2044 | 0 | 0 |  |  | 0 | 3520 | 90   | 141 | 93  | 106 | 90  | 72  | 36 | 6,5  |
| 2045 | 0 | 0 |  |  | 0 | 3685 | 90   | 135 | 95  | 104 | 91  | 72  | 43 | 6,6  |

|      |   |   |   |   |      |      |     |     |     |     |     |    |      |
|------|---|---|---|---|------|------|-----|-----|-----|-----|-----|----|------|
| 2046 | 0 | 0 |   | 0 | 3825 | 95   | 161 | 105 | 119 | 105 | 101 | 44 | 10,5 |
| 2047 | 0 | 0 |   | 1 | 3845 | 95   | 198 | 124 | 142 | 87  | 83  | 38 | 7,3  |
| 2048 | 0 | 0 |   | 1 | 3875 | 95   | 157 | 107 | 119 | 89  | 99  | 50 | 8,8  |
| 2049 | 0 | 0 |   | 0 | 3825 | 95   | 124 | 86  | 95  | 97  | 102 | 48 | 10   |
| 2050 | 0 | 0 |   | 1 | 4070 | 97,5 | 169 | 115 | 129 | 111 | 109 | 43 | 12   |
| 2051 | 0 | 0 |   | 0 | 4170 | 97,5 | 172 | 121 | 131 | 100 | 101 | 43 | 10,2 |
| 2052 | 0 | 0 |   | 0 | 5090 | 100  | 143 | 98  | 109 | 92  | 95  | 44 | 8,8  |
| 2053 | 0 | 0 | 1 | 1 | 2860 | 27,5 | 128 | 76  | 89  | 105 | 82  | 38 | 8,6  |
| 2054 | 0 | 0 | 1 | 1 | 2860 | 27,5 | 135 | 91  | 102 | 110 | 92  | 43 | 10,1 |
| 2055 | 0 | 0 |   | 1 | 2285 | 17,5 | 146 | 102 | 112 | 112 | 75  | 38 | 8,5  |
| 2056 | 0 | 0 |   | 1 | 3535 | 70   | 118 | 86  | 95  | 126 | 84  | 35 | 10,6 |
| 2057 | 0 | 0 |   | 1 | 2730 | 12,5 | 156 | 92  | 106 | 111 | 60  | 30 | 6,7  |
| 2058 | 0 | 0 |   | 0 | 2755 | 7,5  | 139 | 94  | 106 | 97  | 66  | 38 | 6,4  |
| 2059 | 0 | 0 |   | 0 | 2905 | 15   | 124 | 80  | 89  | 117 | 66  | 36 | 7,6  |
| 2060 | 0 | 0 |   | 0 | 2905 | 15   | 122 | 73  | 83  | 85  | 81  | 47 | 6,9  |
| 2061 | 0 | 0 |   | 0 | 2905 | 15   | 127 | 77  | 87  | 88  | 72  | 41 | 6,4  |
| 2062 | 0 | 0 |   | 1 | 1190 | 2,5  | 126 | 95  | 102 | 79  | 64  | 35 | 5,1  |
| 2063 | 0 | 0 |   | 1 | 3715 | 90   | 121 | 82  | 92  | 83  | 80  | 40 | 6,6  |
| 2064 | 0 | 0 |   | 0 | 3220 | 22,5 | 138 | 94  | 105 | 85  | 89  | 47 | 7,5  |
| 2065 | 0 | 0 |   | 0 | 2750 | 47,5 | 144 | 94  | 105 | 92  | 84  | 45 | 7,7  |
| 2066 | 0 | 0 |   | 1 | 2925 | 27,5 | 154 | 107 | 117 | 94  | 53  | 30 | 5    |
| 2067 | 0 | 0 |   | 0 | 3485 | 50   | 157 | 95  | 110 | 71  | 82  | 46 | 5,8  |
| 2068 | 0 | 0 |   | 1 | 3470 | 85   | 164 | 105 | 116 | 124 | 96  | 46 | 11,9 |
| 2069 | 0 | 0 |   | 0 | 3280 | 77,5 | 139 | 100 | 111 | 115 | 51  | 28 | 5,8  |
| 2070 | 0 | 0 |   | 0 | 1585 | 5    | 144 | 95  | 108 | 70  | 73  | 37 | 5    |
| 2071 | 0 | 0 |   | 1 | 2640 | 20   | 140 | 100 | 111 | 92  | 64  | 38 | 6    |
| 2072 | 0 | 0 |   | 1 | 2425 | 7,5  | 142 | 88  | 104 | 102 | 60  | 35 | 6,1  |
| 2073 | 0 | 0 |   | 1 | 2425 | 7,5  | 144 | 94  | 106 | 96  | 87  | 48 | 8,4  |
| 2074 | 0 | 0 |   | 1 | 3460 | 62,5 | 148 | 96  | 110 | 94  | 78  | 34 | 7,3  |
| 2075 | 0 | 0 |   | 1 | 3930 | 92,5 | 136 | 96  | 106 | 122 | 74  | 35 | 9,1  |
| 2076 | 0 | 0 |   | 1 | 3345 | 52,5 | 120 | 81  | 90  | 126 | 48  | 25 | 6,1  |
| 2077 | 0 | 0 | 0 | 0 | 950  | 2,5  | 121 | 82  | 92  | 87  | 53  |    | 4,6  |
| 2078 | 0 | 0 |   | 0 | 2610 | 2,5  | 123 | 90  | 99  | 87  | 84  | 46 | 7,3  |

|      |   |   |   |   |   |      |      |     |     |     |     |     |    |      |
|------|---|---|---|---|---|------|------|-----|-----|-----|-----|-----|----|------|
| 2079 | 0 | 0 |   |   | 0 | 2915 | 15   | 134 | 93  | 104 | 113 | 63  | 34 | 7,1  |
| 2080 | 0 | 0 |   |   | 0 | 3250 | 65   | 153 | 95  | 109 | 105 | 73  | 35 | 7,7  |
| 2081 | 0 | 0 |   |   | 1 | 2660 | 72,5 | 121 | 82  | 93  | 111 | 70  | 32 | 7,7  |
| 2082 | 0 | 0 |   |   | 0 | 2415 | 17,5 | 148 | 97  | 110 | 102 | 86  | 45 | 8,8  |
| 2083 | 0 | 0 | 0 | 1 | 0 | 3720 | 47,5 | 148 | 96  | 109 | 115 | 66  | 37 | 7,5  |
| 2084 | 0 | 0 | 0 | 1 | 0 | 3720 | 47,5 | 116 | 77  | 87  | 94  | 81  | 47 | 7,7  |
| 2085 | 0 | 0 | 0 | 1 | 0 | 3720 | 47,5 | 124 | 87  | 96  | 90  | 78  | 46 | 7    |
| 2086 | 0 | 0 | 1 | 1 | 1 | 3600 | 85   | 155 | 96  | 107 | 102 | 70  | 33 | 7,1  |
| 2087 | 0 | 0 | 0 | 2 | 0 | 3210 | 40   | 136 | 83  | 97  | 102 | 75  | 38 | 7,6  |
| 2088 | 0 | 0 | 0 | 2 | 0 | 3210 | 40   | 140 | 83  | 93  | 103 | 63  | 37 | 6,5  |
| 2089 | 0 | 0 | 0 | 2 | 0 | 3210 | 40   | 123 | 87  | 98  | 110 | 70  | 40 | 7,7  |
| 2090 | 0 | 0 | 0 | 4 | 1 | 3040 | 32,5 | 118 | 76  | 86  | 106 | 79  | 45 | 8,4  |
| 2091 | 0 | 0 | 0 | 4 | 1 | 3040 | 32,5 | 128 | 81  | 91  | 92  | 72  | 42 | 6,5  |
| 2092 | 0 | 0 |   | 0 | 1 | 3005 | 17,5 | 110 | 72  | 81  | 89  | 67  |    | 5,9  |
| 2093 | 0 | 0 |   | 0 |   | 3405 | 65   | 117 | 75  | 85  | 110 | 90  | 50 | 9,7  |
| 2094 | 0 | 0 |   | 0 |   | 3405 | 65   | 105 | 61  | 71  | 114 | 70  | 41 | 8    |
| 2095 | 0 | 0 |   | 0 |   | 3405 | 65   | 114 | 77  | 85  | 96  | 58  | 35 | 5,6  |
| 2096 | 0 | 0 | 2 | 0 | 0 | 3935 | 75   | 165 | 101 | 115 | 119 | 83  | 38 | 9,9  |
| 2097 | 0 | 0 | 2 | 0 | 0 | 3935 | 75   | 168 | 102 | 118 | 110 | 102 | 46 | 11,4 |
| 2098 | 0 | 0 | 0 | 0 | 0 | 3800 | 65   | 103 | 71  | 80  | 78  | 117 | 65 | 9,1  |
| 2099 | 0 | 0 | 0 | 0 | 0 | 3800 | 65   | 111 | 73  | 83  | 79  | 95  | 55 | 7,4  |
| 2100 | 0 | 0 | 0 | 0 | 1 | 2740 | 5    | 164 | 111 | 120 | 100 | 94  | 46 | 9,1  |
| 2101 | 0 | 0 | 0 | 0 | 1 | 2740 | 5    | 118 | 79  | 90  | 76  | 122 | 63 | 9,2  |
| 2102 | 0 | 0 | 0 | 0 | 1 | 2740 | 5    | 142 | 88  | 100 | 94  | 111 | 57 | 10,4 |
| 2103 | 0 | 0 | 0 | 0 | 0 | 3410 | 40   | 119 | 76  | 87  | 90  | 55  |    | 5    |
| 2104 | 0 | 0 | 1 | 0 | 1 | 3620 | 92,5 | 153 | 111 | 121 | 98  | 63  |    | 6,2  |
| 2105 | 0 | 0 | 0 | 0 | 0 | 3040 | 25   | 117 | 79  | 88  | 93  | 87  |    | 8,1  |
| 2106 | 0 | 0 | 1 | 0 | 1 | 2985 | 52,5 | 86  | 48  | 58  | 85  | 105 | 58 | 8,8  |
| 2107 | 0 | 0 | 1 | 0 | 1 | 2985 | 52,5 | 127 | 81  | 91  | 96  | 79  | 45 | 7,6  |
| 2108 | 0 | 0 | 1 | 0 | 1 | 2985 | 52,5 | 126 | 75  | 87  | 85  | 93  | 54 | 7,9  |
| 2109 | 0 | 0 | 0 | 0 | 1 | 4425 | 100  | 134 | 94  | 103 | 102 | 87  |    | 8,8  |
| 2110 | 0 | 0 | 0 | 0 | 0 | 4125 | 95   | 124 | 86  | 97  | 101 | 76  |    | 7,7  |
| 2111 | 0 | 0 | 0 | 0 | 0 | 3470 | 62,5 | 115 | 79  | 89  | 100 | 80  | 42 | 8    |

|      |   |   |   |   |   |      |      |     |     |     |     |     |    |      |
|------|---|---|---|---|---|------|------|-----|-----|-----|-----|-----|----|------|
| 2112 | 0 | 0 | 0 | 0 | 0 | 3470 | 62,5 | 118 | 76  | 86  | 91  | 90  | 48 | 8,2  |
| 2113 | 0 | 0 | 1 | 0 | 0 | 3080 | 15   | 122 | 84  | 94  | 87  | 68  | 39 | 5,9  |
| 2114 | 0 | 0 | 1 | 0 | 0 | 3080 | 15   | 113 | 83  | 92  | 96  | 74  | 41 | 7,1  |
| 2115 | 0 | 0 | 1 | 0 | 0 | 3080 | 15   | 111 | 77  | 87  | 87  | 79  | 46 | 6,9  |
| 2116 | 0 | 0 | 0 | 0 | 1 | 3670 | 77,5 | 118 | 78  | 88  | 99  | 50  |    | 4,9  |
| 2117 | 0 | 0 | 0 | 0 | 0 | 2585 | 32,5 | 111 | 80  | 90  | 95  | 61  | 40 | 5,8  |
| 2118 | 0 | 0 | 0 | 0 | 0 | 2585 | 32,5 | 98  | 71  | 79  | 98  | 52  | 34 | 5,2  |
| 2119 | 0 | 0 | 0 | 0 | 0 | 2865 | 20   | 119 | 89  | 97  | 101 | 86  | 51 | 8,7  |
| 2120 | 0 | 0 | 0 | 0 | 0 | 2865 | 20   | 114 | 75  | 85  | 97  | 64  | 39 | 6,2  |
| 2121 | 0 | 0 | 0 | 0 | 0 | 3850 | 90   | 124 | 88  | 98  | 98  | 80  | 37 | 7,7  |
| 2122 | 0 | 0 | 0 | 0 | 0 | 3850 | 90   | 125 | 81  | 89  | 89  | 89  | 41 | 7,9  |
| 2123 | 0 | 0 | 1 | 0 | 0 | 3580 | 82,5 | 149 | 101 | 115 | 73  | 96  | 51 | 7    |
| 2124 | 0 | 0 | 1 | 0 | 0 | 3580 | 82,5 | 107 | 73  | 83  | 96  | 74  | 44 | 7,1  |
| 2125 | 0 | 0 | 1 | 0 | 0 | 3580 | 82,5 | 114 | 71  | 81  | 83  | 108 | 62 | 8,9  |
| 2126 | 0 | 0 | 0 | 0 | 1 | 3300 | 62,5 | 140 | 81  | 91  | 101 | 86  | 54 | 8,7  |
| 2127 | 0 | 0 | 0 | 0 | 1 | 3300 | 62,5 | 118 | 68  | 81  | 93  | 74  | 47 | 6,9  |
| 2128 | 0 | 0 | 0 | 0 | 1 | 2700 | 5    | 135 | 101 | 111 | 102 | 47  |    | 4,8  |
| 2129 | 0 | 0 | 0 | 0 | 0 | 3800 | 77,5 | 113 | 78  | 88  | 99  | 82  | 46 | 8,2  |
| 2130 | 0 | 0 | 0 | 0 | 0 | 3800 | 77,5 | 116 | 81  | 91  | 100 | 74  | 43 | 7,4  |
| 2131 | 0 | 0 | 2 | 0 | 1 | 2995 | 17,5 | 127 | 72  | 83  | 109 | 65  | 42 | 7,1  |
| 2132 | 0 | 0 | 2 | 0 | 1 | 2995 | 17,5 | 102 | 74  | 82  | 103 | 68  | 44 | 7    |
| 2133 | 0 | 0 | 0 | 0 | 1 | 3335 | 37,5 | 128 | 81  | 93  | 115 | 75  | 39 | 8,6  |
| 2134 | 0 | 0 | 0 | 0 | 1 | 3335 | 37,5 | 127 | 89  | 99  | 95  | 82  | 45 | 7,8  |
| 2135 | 0 | 0 | 0 | 0 | 1 | 3335 | 37,5 | 119 | 74  | 83  | 106 | 88  | 46 | 9,3  |
| 2136 | 0 | 0 | 0 | 0 | 0 | 3620 | 50   | 123 | 83  | 94  | 96  | 82  |    | 7,8  |
| 2137 | 0 | 0 | 0 | 0 | 0 | 3130 | 10   | 124 | 83  | 94  | 83  | 75  | 45 | 6,2  |
| 2138 | 0 | 0 | 0 | 0 | 0 | 3130 | 10   | 118 | 83  | 93  | 93  | 58  | 36 | 5,4  |
| 2139 | 0 | 0 | 0 | 0 | 1 | 3195 | 50   | 135 | 85  | 96  | 115 | 78  | 45 | 8,9  |
| 2140 | 0 | 0 | 0 | 0 | 1 | 3195 | 50   | 124 | 79  | 89  | 104 | 73  | 43 | 7,6  |
| 2141 | 1 | 0 | 0 | 0 | 0 | 2415 | 7,5  | 133 | 92  | 98  | 93  | 75  | 39 | 7    |
| 2142 | 1 | 0 | 0 | 0 | 0 | 2415 | 7,5  | 112 | 75  | 83  | 97  | 86  | 44 | 8,3  |
| 2143 | 1 | 0 | 0 | 0 | 1 | 3160 | 90   | 143 | 96  | 107 | 109 | 101 |    | 11,1 |
| 2144 | 0 | 1 | 0 | 0 | 0 | 2110 | 52,5 |     |     |     |     |     |    |      |

|      |   |   |   |   |   |      |      |     |     |     |     |     |      |     |
|------|---|---|---|---|---|------|------|-----|-----|-----|-----|-----|------|-----|
| 2145 | 0 | 1 | 0 | 0 | 0 | 2110 | 52,5 | 141 | 85  | 95  | 115 | 59  | 35   | 6,8 |
| 2146 | 0 | 0 |   | 0 | 1 | 2575 | 2,5  | 152 | 102 | 117 | 108 | 76  |      | 8,1 |
| 2147 | 0 | 0 |   | 0 | 0 | 2450 | 2,5  | 123 | 92  | 100 | 111 | 52  |      | 5,8 |
| 2148 | 0 | 0 |   | 0 | 0 | 950  | 2,5  | 175 | 99  | 115 | 97  | 61  |      | 5,9 |
| 2149 | 0 | 0 |   | 0 | 0 | 680  | 2,5  | 175 | 101 | 118 | 73  | 101 |      | 7,4 |
| 2150 | 0 | 0 |   | 0 | 0 | 1345 | 5    | 125 | 91  | 102 | 86  | 76  |      | 6,5 |
| 2151 | 0 | 0 |   | 0 | 1 | 2395 | 10   | 151 | 91  | 107 | 93  | 83  |      | 7,7 |
| 2152 | 0 | 0 |   | 0 | 0 | 3100 | 15   | 156 | 105 | 118 | 87  | 84  |      | 7,3 |
| 2153 | 0 | 0 |   | 0 | 1 | 3005 | 17,5 | 153 | 96  | 112 | 92  | 53  |      | 4,8 |
| 2154 | 0 | 0 |   | 0 | 0 | 3270 | 20   | 144 | 110 | 118 | 104 | 73  |      | 7,6 |
| 2155 | 0 | 0 |   | 0 | 1 | 2960 | 25   | 181 | 114 | 130 | 76  | 93  |      | 7   |
| 2156 | 0 | 0 |   | 0 | 0 | 3310 | 30   | 161 | 101 | 118 | 88  | 86  |      | 7,6 |
| 2157 | 0 | 0 |   | 0 | 0 | 3220 | 37,5 | 139 | 98  | 108 | 97  | 89  |      | 8,6 |
| 2158 | 0 | 0 |   | 0 | 1 | 1160 | 40   | 143 | 98  | 110 | 104 | 82  |      | 8,5 |
| 2159 | 0 | 0 |   | 0 | 0 | 1980 | 40   | 140 | 94  | 104 | 83  | 78  |      | 6,5 |
| 2160 | 0 | 0 |   | 0 | 1 | 2615 | 42,5 | 153 | 96  | 109 | 111 | 70  |      | 7,8 |
| 2161 | 0 | 0 |   | 0 | 1 | 1850 | 45   | 127 | 92  | 102 | 90  | 66  |      | 5,9 |
| 2162 | 0 | 0 |   | 0 | 0 | 3620 | 50   | 147 | 93  | 104 | 104 | 68  | 7,1  |     |
| 2163 | 0 | 0 |   | 0 | 0 | 3545 | 55   | 149 | 104 | 114 | 91  | 111 | 10,2 |     |
| 2164 | 0 | 0 |   | 0 | 0 | 3020 | 55   | 160 | 105 | 118 | 111 | 91  | 10,1 |     |
| 2165 | 0 | 0 |   | 0 | 0 | 3570 | 57,5 | 152 | 98  | 111 | 93  | 61  | 5,7  |     |
| 2166 | 0 | 0 |   | 0 | 0 | 3605 | 60   | 149 | 103 | 116 | 94  | 60  | 5,6  |     |
| 2167 | 0 | 0 |   | 0 | 0 | 3495 | 65   | 149 | 104 | 116 | 93  | 146 | 13,5 |     |
| 2168 | 0 | 0 |   | 0 | 1 | 3235 | 67,5 | 123 | 88  | 97  | 95  | 99  | 9,4  |     |
| 2169 | 0 | 0 |   | 0 | 0 | 3815 | 67,5 | 113 | 93  | 100 | 93  | 76  | 7    |     |
| 2170 | 0 | 0 |   | 0 | 1 | 3670 | 77,5 | 136 | 91  | 102 | 102 | 62  | 6,3  |     |
| 2171 | 0 | 0 |   | 0 | 0 | 3635 | 77,5 | 141 | 88  | 102 | 87  | 90  | 7,9  |     |
| 2172 | 0 | 0 |   | 0 | 1 | 3510 | 80   | 124 | 92  | 101 | 93  | 119 | 11   |     |
| 2173 | 0 | 0 |   | 0 | 1 | 3505 | 87,5 | 164 | 94  | 109 | 100 | 77  | 7,7  |     |
| 2174 | 0 | 0 |   | 0 | 1 | 4000 | 97,5 | 138 | 101 | 111 | 89  | 80  | 7,1  |     |
| 2175 | 0 | 0 |   | 0 | 1 | 4420 | 97,5 | 131 | 88  | 98  | 102 | 99  | 10,2 |     |
| 2176 | 0 | 0 |   | 0 | 0 | 4125 | 97,5 | 143 | 101 | 113 | 98  | 94  | 9,2  |     |
| 2177 | 0 | 0 |   | 0 | 0 | 4425 | 100  | 134 | 90  | 100 | 94  | 97  | 9,1  |     |



|      |   |   |   |   |      |      |     |     |     |     |     |    |      |
|------|---|---|---|---|------|------|-----|-----|-----|-----|-----|----|------|
| 2178 | 0 | 0 | 0 | 0 | 4260 | 97,5 | 175 | 113 | 125 | 106 | 88  |    | 9,4  |
| 2179 | 0 | 0 | 0 | 0 | 2720 | 5    | 168 | 104 | 124 | 89  | 99  |    | 8,7  |
| 2180 | 0 | 0 | 0 | 0 | 2570 | 47,5 | 128 | 86  | 98  | 100 | 76  |    | 7,6  |
| 2181 | 0 | 0 |   | 0 | 2630 | 2,5  | 127 | 90  | 101 | 83  | 73  | 43 | 6    |
| 2182 | 0 | 0 |   | 0 | 2630 | 2,5  | 128 | 88  | 99  | 92  | 60  | 35 | 5,5  |
| 2183 | 0 | 0 |   | 0 | 3155 | 12,5 | 109 | 79  | 88  | 95  | 61  | 39 | 5,8  |
| 2184 | 0 | 0 |   | 0 | 3155 | 12,5 | 117 | 85  | 94  | 91  | 55  | 35 | 5    |
| 2185 | 0 | 0 |   | 0 | 4165 | 90   | 109 | 74  | 82  | 89  | 99  | 57 | 8,8  |
| 2186 | 0 | 0 |   | 0 | 4165 | 90   | 123 | 78  | 88  | 93  | 83  | 49 | 7,7  |
| 2187 | 0 | 0 |   | 1 | 3445 | 75   | 132 | 90  | 102 | 86  | 94  | 47 | 8,1  |
| 2188 | 0 | 0 |   | 1 | 3445 | 75   | 127 | 90  | 101 | 85  | 129 | 65 | 11   |
| 2189 | 0 | 0 |   | 0 | 4075 | 85   | 168 | 91  | 111 | 114 | 88  | 43 | 10   |
| 2190 | 0 | 0 |   | 0 | 4075 | 85   | 164 | 101 | 116 | 103 | 121 | 57 | 12,4 |
| 2191 | 0 | 0 |   | 1 | 2880 | 12,5 | 122 | 86  | 94  | 86  | 91  | 47 | 7,8  |
| 2192 | 0 | 0 |   | 1 | 2880 | 12,5 | 130 | 86  | 97  | 88  | 92  | 48 | 8,1  |
| 2193 | 0 | 0 |   | 0 | 2630 | 2,5  | 141 | 98  | 109 | 89  | 76  | 39 | 6,8  |
| 2194 | 0 | 0 |   | 0 | 2630 | 2,5  | 173 | 115 | 130 | 80  | 83  | 44 | 6,7  |
| 2195 | 0 | 0 |   | 1 | 1890 | 50   | 163 | 95  | 112 | 78  | 154 | 70 | 12   |
| 2196 | 0 | 0 |   | 0 | 3757 | 75   | 113 | 76  | 86  | 98  | 105 | 48 | 10,3 |
| 2197 | 0 | 0 |   | 1 | 2465 | 15   | 143 | 102 | 113 | 98  | 96  | 47 | 9,5  |
| 2198 | 0 | 0 |   | 1 | 2465 | 15   | 131 | 82  | 92  | 107 | 107 | 53 | 11,5 |
| 2199 | 0 | 0 |   | 1 | 2491 | 32,5 | 115 | 76  | 87  | 114 | 60  | 33 | 6,8  |
| 2200 | 0 | 0 |   | 1 | 2491 | 32,5 | 115 | 73  | 83  | 96  | 76  | 43 | 7,3  |
| 2201 | 0 | 0 |   | 0 | 3670 | 80   | 117 | 85  | 95  | 92  | 67  | 38 | 6,2  |
| 2202 | 0 | 0 |   | 0 | 1860 | 2,5  | 130 | 85  | 96  | 105 | 64  | 38 | 6,7  |
| 2203 | 0 | 0 |   | 0 | 1860 | 2,5  | 138 | 94  | 104 | 110 | 58  | 34 | 6,4  |
| 2204 | 0 | 0 |   | 0 | 1490 | 2,5  | 140 | 102 | 113 | 81  | 84  | 43 | 6,8  |
| 2205 | 0 | 0 |   | 0 | 970  | 0    | 135 | 88  | 99  | 110 | 60  | 33 | 6,6  |
| 2206 | 0 | 0 |   | 1 | 2835 | 20   | 148 | 104 | 114 | 102 | 87  | 48 | 8,9  |
| 2207 | 0 | 0 |   | 1 | 3160 | 67,5 | 128 | 88  | 97  | 110 | 56  | 29 | 6,2  |
| 2208 | 0 | 0 | 1 | 1 | 4530 | 97,5 | 124 | 89  | 99  | 119 | 65  | 31 | 7,8  |
| 2209 | 0 | 0 | 1 | 1 | 4530 | 97,5 | 138 | 88  | 99  | 89  | 83  | 40 | 7,4  |
| 2210 | 0 | 0 | 1 | 1 | 3330 | 47,5 | 102 | 80  | 85  | 80  | 109 |    | 8,7  |

|      |   |   |   |   |   |      |      |     |     |     |     |     |    |      |
|------|---|---|---|---|---|------|------|-----|-----|-----|-----|-----|----|------|
| 2211 | 0 | 0 | 1 |   | 1 | 120  | 0    | 148 | 100 | 113 | 90  | 76  | 40 | 6,8  |
| 2212 | 1 | 0 |   |   | 0 | 1700 | 2,5  | 88  | 55  | 65  | 86  | 108 | 66 | 9,3  |
| 2213 | 1 | 0 |   |   | 0 | 1700 | 2,5  | 122 | 76  | 88  | 76  | 106 | 65 | 8,1  |
| 2214 | 1 | 0 |   |   | 0 | 1700 | 2,5  | 109 | 73  | 83  | 80  | 87  | 55 | 6,9  |
| 2215 | 0 | 0 | 0 | 3 | 1 | 3075 | 25   | 146 | 99  | 111 | 94  | 121 | 67 | 11,4 |
| 2216 | 0 | 0 | 0 | 3 | 1 | 3075 | 25   | 124 | 89  | 101 | 89  | 79  | 45 | 7,1  |
| 2217 | 0 | 0 | 0 | 4 | 0 | 3395 | 70   | 124 | 84  | 94  | 112 | 80  | 41 | 8,9  |
| 2218 | 0 | 0 | 0 | 4 | 0 | 3395 | 70   | 118 | 84  | 94  | 92  | 85  | 45 | 7,8  |
| 2219 | 0 | 0 | 0 | 4 | 0 | 3395 | 70   | 122 | 82  | 92  | 84  | 95  | 49 | 7,9  |
| 2220 | 0 | 0 | 0 | 4 | 1 | 3085 | 50   | 127 | 83  | 93  | 105 | 72  | 41 | 7,6  |
| 2221 | 0 | 0 | 0 | 4 | 1 | 3085 | 50   | 114 | 83  | 92  | 105 | 59  | 34 | 6,1  |
| 2222 | 0 | 0 | 0 | 0 | 0 | 4015 | 82,5 | 121 | 83  | 93  | 92  | 102 |    | 9,3  |
| 2223 | 0 | 0 |   | 0 | 1 | 3125 | 27,5 | 101 | 74  | 81  | 94  | 68  | 41 | 6,3  |
| 2224 | 0 | 0 |   | 0 | 1 | 3125 | 27,5 | 106 | 79  | 88  | 93  | 66  | 41 | 6,2  |
| 2225 | 0 | 0 |   | 0 | 1 | 3125 | 27,5 | 106 | 81  | 90  | 100 | 48  | 31 | 4,8  |
| 2226 | 0 | 0 | 0 | 0 | 0 | 2985 | 50   | 128 | 90  | 99  | 102 | 78  | 46 | 8    |
| 2227 | 0 | 0 | 0 | 0 | 0 | 2985 | 50   | 122 | 93  | 100 | 103 | 67  | 41 | 6,9  |
| 2228 | 0 | 0 | 0 | 0 | 0 | 2985 | 50   | 130 | 96  | 106 | 103 | 59  | 36 | 6,1  |
| 2229 | 0 | 0 |   | 0 | 1 | 700  | 17,5 | 117 | 80  | 90  | 115 | 45  | 28 | 5,2  |
| 2230 | 0 | 0 |   | 0 | 1 | 700  | 17,5 | 166 | 108 | 121 | 74  | 59  | 35 | 4,3  |
| 2231 | 0 | 0 | 0 | 0 | 1 | 3925 | 97,5 | 133 | 82  | 94  | 84  | 115 | 54 | 9,6  |
| 2232 | 0 | 0 | 0 | 0 | 1 | 3925 | 97,5 | 134 | 87  | 98  | 101 | 84  | 43 | 8,5  |
| 2233 | 0 | 0 | 0 | 0 | 1 | 3205 | 37,5 | 134 | 90  | 103 | 92  | 73  |    | 6,6  |
| 2234 | 0 | 0 | 0 | 0 | 0 | 3755 | 75   | 153 | 108 | 119 | 92  | 79  | 43 | 7,3  |
| 2235 | 0 | 0 | 0 | 0 | 0 | 3755 | 75   | 176 | 118 | 132 | 93  | 76  | 43 | 7,1  |
| 2236 | 0 | 0 | 0 | 0 | 1 | 3415 | 55   |     |     |     |     |     |    |      |
| 2237 | 0 | 0 | 0 | 0 | 1 | 3415 | 55   | 143 | 98  | 110 | 86  | 101 | 48 | 8,8  |
| 2238 | 0 | 0 | 0 | 0 | 0 | 3540 | 55   | 124 | 89  | 99  | 102 | 89  | 45 | 9,1  |
| 2239 | 0 | 0 | 0 | 0 | 0 | 3540 | 55   | 127 | 90  | 101 | 104 | 88  | 45 | 9,2  |
| 2240 | 0 | 0 | 0 | 0 | 0 | 3540 | 55   | 124 | 89  | 98  | 96  | 88  | 46 | 8,5  |
| 2241 | 0 | 0 | 0 | 0 | 0 | 3055 | 15   | 164 | 113 | 124 | 106 | 74  | 37 | 7,8  |
| 2242 | 0 | 0 | 0 | 0 | 0 | 3055 | 15   | 148 | 98  | 112 | 86  | 98  | 49 | 8,3  |
| 2243 | 0 | 0 | 0 | 0 | 1 | 4175 | 97,5 | 127 | 81  | 92  | 94  | 76  |    | 7,1  |

|      |   |   |   |   |   |      |      |     |     |     |     |     |    |      |
|------|---|---|---|---|---|------|------|-----|-----|-----|-----|-----|----|------|
| 2244 | 0 | 0 | 0 | 0 | 0 | 3720 | 90   | 124 | 76  | 88  | 85  | 114 | 58 | 9,6  |
| 2245 | 0 | 0 | 0 | 0 | 0 | 3720 | 90   | 107 | 79  | 87  | 84  | 126 | 63 | 10,6 |
| 2246 | 0 | 0 | 0 | 0 | 0 | 3760 | 85   | 153 | 92  | 108 | 110 | 75  | 38 | 8,2  |
| 2247 | 0 | 0 | 0 | 0 | 0 | 3760 | 85   | 153 | 86  | 98  | 104 | 82  | 41 | 8,6  |
| 2248 | 0 | 0 | 0 | 0 | 0 | 3760 | 85   | 143 | 86  | 101 | 119 | 69  | 34 | 8,3  |
| 2249 | 0 | 0 | 0 | 0 | 0 | 3170 | 35   | 115 | 75  | 86  | 108 | 68  |    | 7,3  |
| 2250 | 0 | 0 | 0 | 0 | 0 | 3760 | 75   | 136 | 96  | 107 | 105 | 99  |    | 10,4 |
| 2251 | 0 | 0 | 0 | 0 | 0 | 2865 | 27,5 | 119 | 86  | 96  | 91  | 83  | 49 | 7,5  |
| 2252 | 0 | 0 | 0 | 0 | 0 | 3340 | 72,5 | 144 | 102 | 113 | 91  | 72  |    | 6,5  |
| 2253 | 0 | 0 | 0 | 0 | 1 | 3140 | 27,5 | 147 | 85  | 103 | 77  | 136 |    | 10,4 |
| 2254 | 0 | 0 | 0 | 0 | 0 | 2905 | 57,5 | 152 | 99  | 112 | 118 | 70  | 41 | 8,3  |
| 2255 | 0 | 0 | 0 | 0 | 0 | 2905 | 57,5 | 147 | 91  | 104 | 101 | 69  | 41 | 7,1  |
| 2256 | 0 | 0 | 0 | 0 | 0 | 2905 | 57,5 | 159 | 95  | 107 | 96  | 63  | 37 | 6,1  |
| 2257 | 0 | 0 | 0 | 0 | 1 | 2690 | 10   | 177 | 110 | 127 | 92  | 85  |    | 7,8  |
| 2258 | 0 | 0 |   | 0 | 0 | 3340 | 72,5 | 183 | 130 | 142 | 100 | 65  |    | 6,5  |
| 2259 | 0 | 0 |   | 0 | 1 | 3205 | 85   | 135 | 96  | 108 | 87  | 99  |    | 8,7  |
| 2260 | 0 | 0 |   | 1 | 1 | 2550 | 7,5  | 163 | 108 | 123 | 80  | 118 |    | 9,4  |
| 2261 | 0 | 0 |   |   | 0 | 3165 | 47,5 | 125 | 90  | 100 | 99  | 83  | 44 | 8,2  |
| 2262 | 0 | 0 |   |   | 0 | 3165 | 47,5 | 138 | 90  | 100 | 115 | 85  | 43 | 9,7  |
| 2263 | 0 | 0 |   |   | 1 | 2520 | 2,5  | 151 | 110 | 121 | 88  | 58  | 36 | 5,2  |
| 2264 | 0 | 0 |   |   | 1 | 2520 | 2,5  | 130 | 81  | 92  | 82  | 75  | 45 | 6,2  |
| 2265 | 0 | 0 |   |   | 1 | 2095 | 7,5  | 133 | 81  | 91  | 89  | 89  | 49 | 8    |
| 2266 | 0 | 0 |   |   | 1 | 2455 | 7,5  | 109 | 67  | 78  | 87  | 95  | 53 | 8,3  |
| 2267 | 0 | 0 |   |   | 1 | 2760 | 7,5  | 124 | 66  | 77  | 81  | 117 | 64 | 9,5  |
| 2268 | 0 | 0 |   |   | 1 | 3035 | 7,5  | 123 | 76  | 87  | 119 | 79  |    | 9,4  |
| 2269 | 0 | 0 |   |   | 1 | 2265 | 7,5  | 133 | 80  | 94  | 106 | 75  | 37 | 8    |
| 2270 | 0 | 0 |   |   | 0 | 2515 | 7,5  | 124 | 77  | 89  | 74  | 69  | 45 | 5,1  |
| 2271 | 0 | 0 |   |   | 1 | 2070 | 7,5  | 138 | 100 | 108 | 105 | 95  | 44 | 9,9  |
| 2272 | 0 | 0 |   |   | 1 | 1645 | 7,5  | 124 | 69  | 83  | 91  | 81  | 50 | 7,4  |
| 2273 | 0 | 0 |   |   | 1 | 2315 | 7,5  | 127 | 79  | 95  | 93  | 111 | 52 | 10,3 |
| 2274 | 0 | 0 |   |   | 0 | 2053 | 7,5  | 124 | 82  | 92  | 118 | 60  | 39 | 7    |
| 2275 | 0 | 0 |   |   | 1 | 2535 | 7,5  | 115 | 71  | 78  | 95  | 85  | 48 | 8,1  |
| 2276 | 0 | 0 |   |   | 1 | 2535 | 7,5  | 123 | 78  | 87  | 105 | 79  | 46 | 8,3  |

|      |   |   |                   |   |   |      |     |     |    |     |     |     |    |     |
|------|---|---|-------------------|---|---|------|-----|-----|----|-----|-----|-----|----|-----|
| 2277 | 0 | 0 | 0                 | 3 | 0 | 2805 | 7,5 | 130 | 81 | 92  | 131 | 63  | 35 | 8,3 |
| 2278 | 0 | 0 | 0                 | 3 | 0 | 2805 | 7,5 | 123 | 83 | 93  | 120 | 69  | 37 | 8,2 |
| 2279 | 0 | 0 | 0                 | 1 | 1 | 2760 | 7,5 | 116 | 74 | 84  | 80  | 76  | 48 | 6,1 |
| 2280 | 0 | 0 | 0                 | 1 | 1 | 2760 | 7,5 | 101 | 61 | 70  | 103 | 79  | 50 | 8,1 |
| 2281 | 0 | 0 | 1                 | 1 | 0 | 2855 | 7,5 | 128 | 86 | 97  | 122 | 61  |    | 7,4 |
| 2282 | 0 | 0 | 0                 | 1 | 1 | 3030 | 7,5 | 110 | 73 | 82  | 74  | 75  |    | 5,5 |
| 2283 | 0 | 0 | 0                 | 4 | 0 | 2910 | 7,5 | 114 | 75 | 86  | 98  | 58  | 38 | 5,6 |
| 2284 | 0 | 0 | 0                 | 4 | 0 | 2910 | 7,5 | 114 | 75 | 86  | 98  | 58  | 38 | 5,6 |
| 2285 | 0 | 0 | 0                 | 4 | 1 | 2805 | 7,5 | 113 | 71 | 81  | 89  | 89  | 50 | 7,9 |
| 2286 | 0 | 0 | 0                 | 4 | 1 | 2805 | 7,5 | 119 | 78 | 88  | 74  | 94  | 54 | 7   |
| 2287 | 0 | 0 | 0                 | 0 | 1 | 2805 | 7,5 | 108 | 81 | 89  | 115 | 57  | 35 | 6,5 |
| 2288 | 0 | 0 | 0                 | 0 | 1 | 2805 | 7,5 | 108 | 73 | 83  | 122 | 67  | 40 | 8,2 |
| 2289 | 0 | 0 | ovulatie inductie | 0 | 1 | 2100 | 7,5 | 108 | 75 | 84  | 87  | 64  |    | 5,6 |
| 2290 | 0 | 0 | 0                 | 0 | 0 | 2940 | 7,5 | 103 | 67 | 76  | 77  | 89  | 57 | 6,8 |
| 2291 | 0 | 0 | 0                 | 0 | 0 | 2940 | 7,5 | 109 | 72 | 83  | 74  | 96  | 63 | 7,1 |
| 2292 | 0 | 0 | 1                 | 0 | 0 | 3040 | 7,5 | 101 | 68 | 77  | 100 | 66  | 42 | 6,6 |
| 2293 | 0 | 0 | 1                 | 0 | 0 | 3040 | 7,5 | 99  | 72 | 80  | 103 | 55  | 36 | 5,7 |
| 2294 | 0 | 0 | 0                 | 0 | 0 | 2615 | 7,5 | 107 | 68 | 78  | 90  | 97  | 55 | 8,8 |
| 2295 | 0 | 0 | 0                 | 0 | 0 | 2615 | 7,5 | 114 | 72 | 81  | 89  | 102 | 58 | 9,1 |
| 2296 | 0 | 0 | 0                 | 0 | 0 | 3135 | 7,5 | 103 | 70 | 79  | 99  | 80  | 47 | 7,9 |
| 2297 | 0 | 0 | 0                 | 0 | 0 | 3135 | 7,5 | 101 | 74 | 82  | 93  | 68  | 41 | 6,3 |
| 2298 | 0 | 0 | 0                 | 0 | 0 | 3180 | 7,5 | 114 | 74 | 85  | 75  | 98  | 60 | 7,3 |
| 2299 | 0 | 0 | 0                 | 0 | 0 | 3180 | 7,5 | 115 | 74 | 86  | 74  | 99  | 59 | 7,3 |
| 2300 | 0 | 0 | 1                 | 0 | 1 | 2905 | 7,5 | 143 | 93 | 109 | 97  | 57  | 34 | 5,5 |
| 2301 | 0 | 0 | 1                 | 0 | 1 | 2905 | 7,5 | 124 | 85 | 96  | 105 | 66  | 39 | 6,9 |
| 2302 | 0 | 0 | 0                 | 0 | 0 | 2785 | 7,5 | 122 | 86 | 96  | 112 | 75  | 40 | 8,4 |
| 2303 | 0 | 0 | 0                 | 0 | 0 | 2785 | 7,5 | 116 | 75 | 86  | 107 | 83  | 44 | 8,8 |
| 2304 | 0 | 0 | 0                 | 0 | 0 | 3025 | 7,5 | 124 | 67 | 81  | 91  | 86  | 47 | 7,8 |
| 2305 | 0 | 0 | 0                 | 0 | 0 | 3025 | 7,5 | 132 | 77 | 88  | 92  | 104 | 56 | 9,5 |
| 2306 | 0 | 0 | 0                 | 0 | 1 | 2555 | 7,5 | 114 | 73 | 83  | 75  | 68  | 45 | 5,1 |
| 2307 | 0 | 0 | 0                 | 0 | 1 | 2555 | 7,5 | 113 | 74 | 83  | 86  | 64  | 41 | 5,5 |
| 2308 | 0 | 0 | 0                 | 0 | 0 | 3040 | 7,5 | 111 | 77 | 87  | 80  | 80  |    | 6,4 |
| 2309 | 0 | 0 | 0                 | 0 | 0 | 1955 | 7,5 | 119 | 83 | 92  | 118 | 40  | 25 | 4,7 |

|      |   |   |   |   |   |      |     |     |    |     |     |     |    |      |
|------|---|---|---|---|---|------|-----|-----|----|-----|-----|-----|----|------|
| 2310 | 0 | 0 | 0 | 0 | 0 | 1955 | 7,5 | 103 | 70 | 79  | 101 | 71  | 44 | 7,2  |
| 2311 | 0 | 0 | 0 | 0 | 0 | 2945 | 7,5 | 96  | 71 | 79  | 85  | 51  | 33 | 4,4  |
| 2312 | 0 | 0 | 0 | 0 | 0 | 2945 | 7,5 | 104 | 70 | 78  | 107 | 36  | 23 | 3,9  |
| 2313 | 0 | 0 | 0 | 0 | 0 | 2935 | 7,5 | 118 | 70 | 83  | 68  | 103 | 60 | 7    |
| 2314 | 0 | 0 | 0 | 0 | 0 | 2935 | 7,5 | 121 | 70 | 79  | 63  | 97  | 56 | 6,1  |
| 2315 | 0 | 0 | 0 | 0 | 0 | 3050 | 7,5 | 128 | 85 | 97  | 109 | 74  | 38 | 8,1  |
| 2316 | 0 | 0 | 0 | 0 | 0 | 3050 | 7,5 | 119 | 79 | 88  | 109 | 76  | 40 | 8,2  |
| 2317 | 0 | 0 | 0 | 0 | 0 | 3050 | 7,5 | 112 | 74 | 83  | 98  | 69  | 36 | 6,7  |
| 2318 | 0 | 0 | 2 | 0 | 0 | 2945 | 7,5 | 119 | 72 | 82  | 93  | 128 |    | 11,9 |
| 2319 | 0 | 0 |   |   | 1 | 2690 | 7,5 | 142 | 86 | 98  | 97  | 79  | 43 | 7,7  |
| 2320 | 0 | 0 |   |   | 1 | 2690 | 7,5 | 130 | 88 | 99  | 96  | 77  | 42 | 7,3  |
| 2321 | 0 | 0 |   |   | 0 | 1995 | 7,5 | 108 | 79 | 87  | 107 | 57  | 35 | 6,1  |
| 2322 | 0 | 0 |   |   | 0 | 3180 | 7,5 | 105 | 72 | 82  | 93  | 68  | 41 | 6,3  |
| 2323 | 0 | 0 |   |   | 0 | 3180 | 7,5 | 108 | 67 | 78  | 94  | 74  | 43 | 7    |
| 2324 | 0 | 0 |   |   | 0 | 1995 | 7,5 | 117 | 71 | 81  | 91  | 96  | 54 | 8,7  |
| 2325 | 0 | 0 |   |   | 1 | 2630 | 5   | 122 | 75 | 86  | 94  | 85  | 46 | 8    |
| 2326 | 0 | 0 |   |   | 0 | 2845 | 5   | 151 | 96 | 108 | 103 | 59  | 30 | 6,1  |
| 2327 | 0 | 0 |   |   | 0 | 2840 | 5   | 172 | 77 | 94  | 100 | 87  | 47 | 8,7  |
| 2328 | 0 | 0 |   |   | 0 | 2690 | 5   | 159 | 89 | 106 | 114 | 59  | 31 | 6,8  |
| 2329 | 0 | 0 |   |   | 0 | 2450 | 5   | 114 | 83 | 92  | 100 | 72  | 46 | 7,2  |
| 2330 | 0 | 0 |   |   | 0 | 2255 | 5   | 152 | 94 | 106 | 101 | 77  | 42 | 7,8  |
| 2331 | 0 | 0 |   |   | 0 | 2890 | 5   | 120 | 90 | 97  | 93  | 53  | 32 | 4,9  |
| 2332 | 0 | 0 | 0 |   | 0 | 2630 | 5   | 119 | 81 | 90  | 93  | 87  | 47 | 8,1  |
| 2333 | 0 | 0 | 0 |   | 0 | 2630 | 5   | 113 | 73 | 83  | 93  | 102 | 54 | 9,5  |
| 2334 | 0 | 0 |   |   | 0 | 2180 | 5   | 118 | 79 | 89  | 76  | 60  | 39 | 4,6  |
| 2335 | 0 | 0 | 0 | 1 | 0 | 2435 | 5   | 113 | 66 | 77  | 93  | 95  | 59 | 8,9  |
| 2336 | 0 | 0 | 0 | 1 | 0 | 2435 | 5   | 101 | 69 | 79  | 96  | 85  | 53 | 8,1  |
| 2337 | 0 | 0 | 0 | 1 | 0 | 2535 | 5   | 121 | 75 | 85  | 68  | 75  | 52 | 5,1  |
| 2338 | 0 | 0 | 0 | 1 | 1 | 2550 | 5   | 103 | 61 | 73  | 87  | 67  | 45 | 5,8  |
| 2339 | 0 | 0 | 0 | 1 | 1 | 2550 | 5   | 100 | 56 | 66  | 75  | 87  | 57 | 6,5  |
| 2340 | 0 | 0 | 0 | 1 | 0 | 2455 | 5   | 113 | 73 | 82  | 106 | 75  | 45 | 7,9  |
| 2341 | 0 | 0 | 0 | 1 | 0 | 2455 | 5   | 109 | 73 | 80  | 112 | 76  | 47 | 8,5  |
| 2342 | 0 | 0 | 0 | 1 | 0 | 2950 | 5   | 122 | 81 | 91  | 106 | 60  |    | 6,4  |

|      |   |   |   |   |   |      |   |     |    |     |     |     |    |     |
|------|---|---|---|---|---|------|---|-----|----|-----|-----|-----|----|-----|
| 2343 | 0 | 0 | 0 | 4 | 1 | 2210 | 5 | 134 | 76 | 92  | 82  | 92  |    | 7,4 |
| 2344 | 0 | 0 | 0 | 0 | 1 | 2585 | 5 | 117 | 79 | 90  | 104 | 65  | 36 | 6,7 |
| 2345 | 0 | 0 | 0 | 0 | 1 | 2480 | 5 | 106 | 73 | 83  | 111 | 65  | 36 | 7,2 |
| 2346 | 0 | 0 | 0 | 0 | 1 | 2585 | 5 | 102 | 74 | 83  | 85  | 78  | 43 | 6,6 |
| 2347 | 0 | 0 | 0 | 0 | 0 | 2860 | 5 | 99  | 61 | 71  | 101 | 68  | 40 | 6,9 |
| 2348 | 0 | 0 | 0 | 0 | 1 | 2480 | 5 | 118 | 78 | 88  | 98  | 72  | 41 | 7   |
| 2349 | 0 | 0 | 0 | 0 | 0 | 2710 | 5 | 101 | 47 | 62  | 82  | 88  | 52 | 7,2 |
| 2350 | 0 | 0 | 0 | 0 | 0 | 2860 | 5 | 100 | 59 | 68  | 90  | 86  | 49 | 7,7 |
| 2351 | 0 | 0 | 0 | 0 | 0 | 2710 | 5 | 106 | 66 | 76  | 79  | 102 | 58 | 8,1 |
| 2352 | 0 | 0 | 0 | 0 | 1 | 2290 | 5 |     |    |     |     |     |    |     |
| 2353 | 0 | 0 | 0 | 0 | 1 | 2290 | 5 | 118 | 74 | 85  | 113 | 72  | 40 | 8,2 |
| 2354 | 0 | 0 | 0 | 0 | 1 | 2290 | 5 | 110 | 74 | 84  | 103 | 66  | 38 | 6,8 |
| 2355 | 0 | 0 | 0 | 0 | 0 | 2510 | 5 | 102 | 67 | 76  | 100 | 56  |    | 5,6 |
| 2356 | 0 | 0 | 0 | 0 | 1 | 2355 | 5 | 131 | 83 | 95  | 104 | 68  | 38 | 7   |
| 2357 | 0 | 0 | 0 | 0 | 1 | 2355 | 5 | 135 | 91 | 102 | 101 | 78  | 43 | 7,8 |
| 2358 | 0 | 0 | 0 | 0 | 1 | 2355 | 5 | 128 | 75 | 86  | 98  | 75  | 42 | 7,3 |
| 2359 | 0 | 0 | 0 | 0 | 0 | 2830 | 5 | 159 | 95 | 109 | 93  | 74  | 42 | 6,9 |
| 2360 | 0 | 0 | 0 | 0 | 0 | 2690 | 5 | 99  | 70 | 79  | 92  | 51  | 34 | 4,6 |
| 2361 | 0 | 0 | 0 | 0 | 0 | 2690 | 5 | 121 | 72 | 86  | 81  | 57  | 39 | 4,7 |
| 2362 | 0 | 0 | 1 | 0 | 0 | 2840 | 5 | 110 | 79 | 89  | 94  | 57  | 36 | 5,4 |
| 2363 | 0 | 0 | 1 | 0 | 0 | 2840 | 5 | 127 | 79 | 93  | 80  | 65  | 41 | 5,2 |
| 2364 | 0 | 0 | 0 | 0 | 1 | 2750 | 5 | 98  | 63 | 72  | 99  | 41  | 32 | 4,1 |
| 2365 | 0 | 0 | 0 | 0 | 1 | 2750 | 5 | 101 | 58 | 68  | 99  | 56  | 43 | 5,6 |
| 2366 | 0 | 0 | 0 | 0 | 0 | 2880 | 5 | 110 | 75 | 85  | 110 | 70  | 40 | 7,7 |
| 2367 | 0 | 0 | 0 | 0 | 0 | 2880 | 5 | 107 | 68 | 79  | 92  | 83  | 48 | 7,7 |
| 2368 | 0 | 0 | 0 | 0 | 0 | 2880 | 5 | 124 | 78 | 89  | 98  | 75  | 43 | 7,3 |
| 2369 | 0 | 0 | 0 | 0 | 0 | 2885 | 5 | 93  | 65 | 74  | 116 | 46  | 29 | 5,3 |
| 2370 | 0 | 0 |   | 0 | 1 | 1370 | 5 | 122 | 80 | 90  | 75  | 56  |    | 4,3 |
| 2371 | 0 | 0 |   |   | 0 | 2965 | 5 | 111 | 71 | 81  | 101 | 84  | 46 | 8,5 |
| 2372 | 0 | 0 |   |   | 0 | 2645 | 5 | 107 | 68 | 77  | 92  | 103 | 55 | 9,3 |
| 2373 | 0 | 0 |   |   | 0 | 2645 | 5 | 114 | 73 | 83  | 84  | 108 | 57 | 8,8 |
| 2374 | 0 | 0 |   |   | 0 | 2965 | 5 | 108 | 72 | 82  | 96  | 84  | 44 | 8   |
| 2375 | 0 | 0 |   |   | 0 | 2565 | 5 | 111 | 79 | 87  | 112 | 75  | 42 | 8,4 |

|      |   |   |   |   |      |      |     |     |     |     |     |    |      |     |
|------|---|---|---|---|------|------|-----|-----|-----|-----|-----|----|------|-----|
| 2376 | 0 | 0 |   | 0 | 2565 | 5    | 123 | 80  | 91  | 97  | 78  | 44 | 7,6  |     |
| 2377 | 0 | 0 |   | 1 | 1925 | 2,5  | 110 | 78  | 86  | 87  | 88  | 52 | 7,6  |     |
| 2378 | 0 | 0 |   | 1 | 1650 | 2,5  | 111 | 77  | 87  | 98  | 89  | 44 | 8,7  |     |
| 2379 | 0 | 0 |   | 0 | 673  | 2,5  | 114 | 71  | 82  | 81  | 86  | 46 | 7    |     |
| 2380 | 0 | 0 |   | 1 | 2420 | 2,5  | 127 | 88  | 98  | 99  | 47  | 29 | 4,7  |     |
| 2381 | 0 | 0 |   | 0 | 2115 | 2,5  | 130 | 74  | 88  | 78  | 96  | 54 | 7,5  |     |
| 2382 | 0 | 0 |   | 1 | 1635 | 2,5  | 108 | 68  | 79  | 93  | 75  | 44 | 7    |     |
| 2383 | 0 | 0 |   | 0 | 2020 | 2,5  | 135 | 87  | 97  | 93  | 96  | 54 | 9    |     |
| 2384 | 0 | 0 |   | 1 | 2470 | 2,5  | 100 | 81  | 87  | 83  | 99  | 54 | 8,2  |     |
| 2385 | 0 | 0 |   | 0 | 1235 | 2,5  | 135 | 86  | 98  | 119 | 51  | 29 | 6,1  |     |
| 2386 | 0 | 0 |   | 0 | 2750 | 2,5  | 99  | 65  | 74  | 96  | 79  | 54 | 7,6  |     |
| 2387 | 0 | 0 |   | 1 | 2290 | 2,5  | 144 | 91  | 106 | 92  | 66  | 34 | 6,1  |     |
| 2388 | 0 | 0 |   | 1 | 2440 | 2,5  | 120 | 81  | 91  | 88  | 69  | 39 | 6,1  |     |
| 2389 | 0 | 0 |   | 0 | 1250 | 2,5  | 131 | 81  | 93  | 81  | 81  | 44 | 6,6  |     |
| 2390 | 0 | 0 |   | 1 | 2625 | 2,5  | 139 | 94  | 106 | 99  | 72  | 40 | 7,1  |     |
| 2391 | 0 | 0 |   | 1 | 1255 | 2,5  | 128 | 93  | 103 | 97  | 70  | 38 | 6,8  |     |
| 2392 | 0 | 0 |   | 0 | 2140 | 2,5  | 113 | 66  | 77  | 101 | 81  | 48 | 8,2  |     |
| 2393 | 0 | 0 |   | 1 | 1680 | 2,5  | 136 | 74  | 84  | 110 | 96  | 47 | 10,5 |     |
| 2394 | 0 | 0 |   | 0 | 2510 | 2,5  | 114 | 78  | 87  | 104 | 80  | 43 | 8,3  |     |
| 2395 | 0 | 0 |   | 0 | 2750 | 2,5  | 94  | 60  | 70  | 70  | 90  | 62 | 6,3  |     |
| 2396 | 0 | 0 |   | 1 | 1695 | 2,5  | 117 | 64  | 77  | 72  | 88  | 54 | 6,4  |     |
| 2397 | 0 | 0 |   | 0 | 2660 | 2,5  | 130 | 85  | 94  | 121 | 71  | 39 | 8,6  |     |
| 2398 | 0 | 1 |   | 1 | 564  | 2,5  | 114 | 75  | 85  | 94  | 121 | 54 | 11,4 |     |
| 2399 | 0 | 0 |   | 1 | 2645 | 2,5  | 127 | 83  | 94  | 118 | 75  | 39 | 8,9  |     |
| 2400 | 0 | 0 |   | 1 | 500  | 2,5  | 108 | 76  | 86  | 105 | 79  | 41 | 8,3  |     |
| 2401 | 0 | 0 | 0 | 0 | 2890 | 2,5  | 114 | 70  | 81  | 81  | 79  | 50 | 6,4  |     |
| 2402 | 0 | 0 | 0 | 0 | 2890 | 2,5  | 101 | 70  | 80  | 89  | 60  | 39 | 5,3  |     |
| 2403 | 0 | 0 |   | 0 | 2140 | 2,5  | 138 | 91  | 103 | 94  | 64  | 33 | 6,1  |     |
| 2404 | 0 | 0 | 0 | 3 | 0    | 2600 | 2,5 | 105 | 64  | 73  | 102 | 81 | 52   | 8,3 |
| 2405 | 0 | 0 | 0 | 3 | 0    | 2600 | 2,5 | 114 | 68  | 78  | 106 | 85 | 54   | 9   |
| 2406 | 0 | 0 | 0 | 3 | 1    | 2220 | 2,5 | 109 | 79  | 87  | 95  | 78 |      | 7,4 |
| 2407 | 0 | 0 | 2 | 1 | 0    | 2715 | 2,5 | 121 | 74  | 87  | 89  | 97 | 54   | 8,6 |
| 2408 | 0 | 0 | 2 | 1 | 0    | 2715 | 2,5 | 133 | 69  | 85  | 91  | 91 | 53   | 8,3 |

|      |   |   |   |   |   |      |     |     |    |     |     |     |    |     |
|------|---|---|---|---|---|------|-----|-----|----|-----|-----|-----|----|-----|
| 2409 | 0 | 0 | 0 | 1 | 0 | 2900 | 2,5 | 105 | 69 | 78  | 91  | 73  | 45 | 6,6 |
| 2410 | 0 | 0 | 0 | 1 | 0 | 2900 | 2,5 | 114 | 71 | 81  | 86  | 79  | 49 | 6,8 |
| 2411 | 0 | 0 | 0 | 1 | 0 | 2110 | 2,5 | 135 | 83 | 97  | 110 | 84  | 43 | 9,2 |
| 2412 | 0 | 0 | 0 | 1 | 0 | 2110 | 2,5 | 138 | 91 | 103 | 95  | 102 | 53 | 9,7 |
| 2413 | 0 | 0 | 0 | 1 | 0 | 2110 | 2,5 | 141 | 77 | 88  | 95  | 86  | 45 | 8,1 |
| 2414 | 0 | 0 | 0 | 1 | 1 | 2085 | 2,5 | 107 | 60 | 71  | 82  | 73  | 48 | 6   |
| 2415 | 0 | 0 | 0 | 1 | 1 | 2085 | 2,5 | 112 | 73 | 81  | 96  | 60  | 39 | 5,8 |
| 2416 | 0 | 0 | 0 | 1 | 0 | 2450 | 2,5 | 114 | 62 | 74  | 97  | 65  |    | 6,3 |
| 2417 | 0 | 0 | 0 | 1 | 1 | 2440 | 2,5 | 107 | 71 | 80  | 108 | 64  |    | 6,9 |
| 2418 | 0 | 0 | 0 | 2 | 1 | 2345 | 2,5 | 100 | 70 | 79  | 96  | 59  | 39 | 5,6 |
| 2419 | 0 | 0 | 0 | 2 | 1 | 2445 | 2,5 | 106 | 70 | 80  | 97  | 74  |    | 7,2 |
| 2420 | 0 | 0 | 0 | 4 | 1 | 2410 | 2,5 | 124 | 80 | 91  | 100 | 77  | 45 | 7,7 |
| 2421 | 0 | 0 | 0 | 4 | 1 | 2410 | 2,5 | 116 | 78 | 88  | 120 | 62  | 35 | 7,4 |
| 2422 | 0 | 0 | 0 | 4 | 0 | 2570 | 2,5 | 124 | 76 | 86  | 92  | 77  | 40 | 7,1 |
| 2423 | 0 | 0 | 0 | 4 | 0 | 2570 | 2,5 | 122 | 80 | 91  | 80  | 79  | 43 | 6,3 |
| 2424 | 0 | 0 | 0 | 4 | 0 | 2795 | 2,5 | 113 | 73 | 84  | 102 | 78  | 45 | 7,9 |
| 2425 | 0 | 0 | 0 | 4 | 0 | 2795 | 2,5 | 122 | 78 | 90  | 111 | 74  | 44 | 8,3 |
| 2426 | 0 | 0 | 0 | 4 | 1 | 2065 | 2,5 | 111 | 75 | 85  | 102 | 69  |    | 7,1 |
| 2427 | 0 | 0 | 0 | 0 | 0 | 2725 | 2,5 | 118 | 86 | 96  | 85  | 74  | 43 | 6,3 |
| 2428 | 0 | 0 | 0 | 0 | 0 | 2725 | 2,5 | 121 | 81 | 91  | 94  | 67  | 41 | 6,3 |
| 2429 | 0 | 0 | 0 | 0 | 1 | 2665 | 2,5 | 119 | 78 | 88  | 113 | 66  | 38 | 7,4 |
| 2430 | 0 | 0 | 0 | 0 | 1 | 2665 | 2,5 | 100 | 73 | 81  | 107 | 64  | 37 | 6,8 |
| 2431 | 0 | 0 | 0 | 0 | 0 | 2725 | 2,5 | 125 | 83 | 93  | 91  | 71  | 43 | 6,5 |
| 2432 | 0 | 0 | 0 | 0 | 0 | 2555 | 2,5 | 108 | 75 | 85  | 90  | 67  | 43 | 6   |
| 2433 | 0 | 0 | 0 | 0 | 0 | 2555 | 2,5 | 115 | 77 | 88  | 110 | 53  | 33 | 5,8 |
| 2434 | 0 | 0 | 0 | 0 | 0 | 2560 | 2,5 | 93  | 67 | 75  | 76  | 64  |    | 4,9 |
| 2435 | 0 | 0 | 0 | 0 | 0 | 2790 | 2,5 | 122 | 78 | 88  | 100 | 71  | 41 | 7,1 |
| 2436 | 0 | 0 | 0 | 0 | 0 | 2790 | 2,5 | 121 | 80 | 90  | 107 | 59  | 36 | 6,3 |
| 2437 | 0 | 0 | 0 | 0 | 1 | 2240 | 2,5 | 103 | 72 | 79  | 118 | 74  | 38 | 8,7 |
| 2438 | 0 | 0 | 0 | 0 | 1 | 2240 | 2,5 | 127 | 79 | 90  | 106 | 84  | 43 | 8,9 |
| 2439 | 0 | 0 | 0 | 0 | 1 | 2440 | 2,5 | 108 | 71 | 81  | 91  | 68  | 40 | 6,2 |
| 2440 | 0 | 0 | 0 | 0 | 1 | 2440 | 2,5 | 107 | 71 | 81  | 89  | 58  | 35 | 5,2 |
| 2441 | 0 | 0 | 0 | 0 | 1 | 2545 | 2,5 | 113 | 71 | 81  | 102 | 52  | 33 | 5,4 |



|      |   |   |   |   |   |      |     |     |    |     |     |     |    |     |
|------|---|---|---|---|---|------|-----|-----|----|-----|-----|-----|----|-----|
| 2442 | 0 | 0 | 0 | 0 | 1 | 2545 | 2,5 | 122 | 69 | 81  | 79  | 77  | 47 | 6,1 |
| 2443 | 0 | 0 | 0 | 0 | 1 | 2395 | 2,5 | 107 | 70 | 79  | 89  | 68  | 39 | 6   |
| 2444 | 0 | 0 | 0 | 0 | 1 | 2395 | 2,5 | 124 | 83 | 94  | 80  | 79  | 46 | 6,2 |
| 2445 | 0 | 0 | 0 | 0 | 0 | 1425 | 2,5 | 130 | 89 | 101 | 108 | 79  |    | 8,5 |
| 2446 | 0 | 0 | 0 | 0 | 0 | 2650 | 2,5 | 100 | 71 | 79  | 104 | 53  | 35 | 5,5 |
| 2447 | 0 | 0 | 0 | 0 | 0 | 2650 | 2,5 | 100 | 71 | 80  | 102 | 43  | 29 | 4,4 |
| 2448 | 0 | 0 | 0 | 0 | 0 | 2550 | 2,5 | 103 | 74 | 83  | 101 | 70  | 43 | 7   |
| 2449 | 0 | 0 | 0 | 0 | 0 | 2550 | 2,5 | 99  | 70 | 79  | 91  | 86  | 52 | 7,9 |
| 2450 | 0 | 0 | 0 | 0 | 0 | 2890 | 2,5 | 119 | 79 | 90  | 94  | 100 | 57 | 9,4 |
| 2451 | 0 | 0 | 0 | 0 | 0 | 2890 | 2,5 | 98  | 65 | 74  | 97  | 90  | 53 | 8,8 |
| 2452 | 0 | 0 | 0 | 0 | 0 | 2875 | 2,5 | 119 | 80 | 91  | 93  | 66  | 40 | 6,1 |
| 2453 | 0 | 0 | 0 | 0 | 0 | 2875 | 2,5 | 122 | 76 | 87  | 95  | 90  | 53 | 8,5 |
| 2454 | 0 | 0 |   | 0 | 1 | 2170 | 2,5 | 153 | 99 | 113 | 119 | 52  |    | 6,2 |
| 2455 | 0 | 0 |   | 0 | 1 | 717  | 2,5 | 128 | 83 | 96  | 100 | 82  |    | 8,2 |
| 2456 | 0 | 0 |   | 1 | 0 | 1460 | 2,5 | 108 | 73 | 84  | 89  | 72  |    | 6,3 |
| 2457 | 0 | 0 |   |   | 0 | 2040 | 0   | 132 | 93 | 104 | 94  | 81  | 42 | 7,6 |
| 2458 | 0 | 0 |   |   | 1 | 80   | 0   | 115 | 70 | 80  | 66  | 96  | 56 | 6,3 |
| 2459 | 0 | 0 |   |   | 0 | 1716 | 0   | 110 | 79 | 88  | 115 | 44  | 28 | 4,9 |
| 2460 | 0 | 0 |   |   | 0 | 2125 | 0   | 125 | 74 | 83  | 93  | 104 | 54 | 9,6 |
| 2461 | 0 | 0 | 0 | 2 | 1 | 530  | 0   | 132 | 78 | 89  | 90  | 90  | 49 | 8,1 |
| 2462 | 0 | 0 | 0 | 2 | 1 | 530  | 0   | 109 | 69 | 80  | 77  | 103 | 56 | 7,9 |

| ID Code | CI-st | Gestat asses | TBW   | ECW%  | ECW   | ICW   | ECW/ICW | BSA   |
|---------|-------|--------------|-------|-------|-------|-------|---------|-------|
| 1       | 3,7   | 36,86        | 35,85 | 44,85 | 16,08 | 19,77 | 0,813   | 1,791 |
| 2       | 4,4   | 39,86        | 38,76 | 43,85 | 17    | 21,76 | 0,781   | 2,127 |
| 3       | 3,5   | 33           |       |       |       |       |         |       |
| 4       | 3,6   | 28,72        |       |       |       |       |         |       |
| 5       | 4,2   | 32,28        | 36,65 | 45,94 | 16,84 | 19,81 | 0,85    | 1,829 |
| 6       | 4,8   | 31,14        | 30,52 | 39,67 | 12,11 | 18,41 | 0,657   | 1,823 |
| 7       | 3,9   | 30           |       |       |       |       |         |       |
| 8       | 3,6   | 31,72        | 28,21 | 43,63 | 12,31 | 15,9  | 0,774   | 1,514 |
| 9       | 5,2   | 27,18        | 36,01 | 43,23 | 15,57 | 20,44 | 0,761   | 1,944 |
| 10      | 4,3   | 32,43        | 30,63 | 41,49 | 12,71 | 17,92 | 0,709   | 1,7   |
| 11      | 3,7   | 30,43        | 29,37 | 43,37 | 12,74 | 16,63 | 0,766   | 1,639 |
| 12      | 3,6   | 20,43        |       |       |       |       |         |       |
| 13      |       | 38,43        |       |       |       |       |         |       |
| 14      | 4,4   | 33           | 30,27 | 42,64 | 12,91 | 17,36 | 0,743   | 1,629 |
| 15      | 4,6   | 20,72        | 33,75 | 43,64 | 14,73 | 19,02 | 0,774   | 1,748 |
| 16      | 5     | 11,72        | 36,18 | 44,52 | 16,11 | 20,07 | 0,802   | 1,645 |
| 17      | 3,3   | 12,43        | 35,58 | 44,71 | 15,91 | 19,67 | 0,808   | 1,762 |
| 18      | 4,8   | 19,28        | 35,08 | 40,3  | 14,14 | 20,94 | 0,675   | 2,107 |
| 19      | 4,4   | 11,28        | 35,36 | 40,1  | 14,18 | 21,18 | 0,669   | 2,141 |
| 20      | 4,7   | 19,86        | 27,47 | 42,55 | 11,69 | 15,78 | 0,74    | 1,417 |
| 21      | 3,6   | 13,43        | 24,93 | 40,67 | 10,14 | 14,79 | 0,685   | 1,371 |
| 22      |       | 12           |       |       |       |       |         |       |
| 23      | 3,9   | 12,43        | 31,32 | 43,42 | 13,6  | 17,72 | 0,767   | 1,788 |
| 24      | 4,5   | 13           | 31,01 | 42,53 | 13,19 | 17,82 | 0,74    | 1,808 |
| 25      | 4,1   | 21           |       |       |       |       |         |       |
| 26      | 4,5   | 20,28        | 34,58 | 46,41 | 16,05 | 18,53 | 0,866   | 1,843 |
| 27      | 4     | 13,14        | 33,99 | 45,89 | 15,6  | 18,39 | 0,848   | 1,848 |
| 28      | 4     | 12           | 33,14 | 44,41 | 14,72 | 18,42 | 0,799   | 1,668 |
| 29      | 3,9   | 20           | 33,76 | 44,07 | 14,88 | 18,88 | 0,788   | 1,723 |
| 30      | 3,9   | 21,14        | 39,4  | 43,75 | 17,24 | 22,16 | 0,777   | 2,124 |
| 31      | 4,3   | 12,57        | 35,96 | 41,54 | 14,94 | 21,02 | 0,71    | 2,059 |
| 32      |       | 20,43        | 33,42 | 44,37 | 14,83 | 18,59 | 0,797   | 1,809 |

|    |     |       |       |       |       |       |       |       |
|----|-----|-------|-------|-------|-------|-------|-------|-------|
| 33 | 4,9 | 11,57 | 34,38 | 44,79 | 15,4  | 18,98 | 0,811 | 1,74  |
| 34 |     | 32,86 |       |       |       |       |       |       |
| 35 |     | 37,28 |       |       |       |       |       |       |
| 36 |     | 33,14 |       |       |       |       |       |       |
| 37 |     | 37,43 |       |       |       |       |       |       |
| 38 | 4,4 | 20    | 35,81 | 43,08 | 15,43 | 20,38 | 0,757 | 1,92  |
| 39 | 4,7 | 11,43 | 35,31 | 43,35 | 15,31 | 20    | 0,765 | 1,845 |
| 40 | 4,2 | 34,86 | 39,9  | 46,59 | 18,59 | 21,31 | 0,872 | 2,019 |
| 41 | 3,5 | 27,86 |       |       |       |       |       |       |
| 42 | 3,4 | 36,28 | 34,48 | 45,38 | 15,65 | 18,83 | 0,831 | 1,699 |
| 43 | 3,9 | 31    | 41,89 | 45,95 | 19,25 | 22,64 | 0,85  | 2,042 |
| 44 | 4   | 30,43 | 28,83 | 40,92 | 11,8  | 17,03 | 0,692 | 1,567 |
| 45 | 4,7 | 30,43 | 34,06 | 44,68 | 15,22 | 18,84 | 0,807 | 1,782 |
| 46 | 4,1 | 33,72 | 34,67 | 42,97 | 14,9  | 19,77 | 0,753 | 1,88  |
| 47 | 5,1 | 33,57 |       |       |       |       |       |       |
| 48 | 5   | 29,28 |       |       |       |       |       |       |
| 49 | 4,1 | 19,57 | 32,09 | 43,59 | 13,99 | 18,1  | 0,772 | 1,725 |
| 50 |     | 11,72 |       |       |       |       |       |       |
| 51 | 3,1 | 39,28 |       |       |       |       |       |       |
| 52 | 3,5 | 33,28 | 37,09 | 46,29 | 17,17 | 19,92 | 0,961 | 1,858 |
| 53 | 3,7 | 31    |       |       |       |       |       |       |
| 54 | 3,3 | 31,86 | 27,83 | 45,92 | 12,78 | 15,05 | 0,849 | 1,382 |
| 55 | 3,5 | 36,72 |       |       |       |       |       |       |
| 56 | 3,4 | 38,43 | 43,83 | 46,38 | 20,33 | 23,5  | 0,865 | 2,121 |
| 57 | 5,8 | 20,72 | 40,19 | 44,21 | 17,77 | 22,42 | 0,792 | 2,05  |
| 58 | 3,3 | 30,72 | 29,57 | 42,74 | 12,64 | 16,93 | 0,746 | 1,549 |
| 59 | 4,1 | 31,72 |       |       |       |       |       |       |
| 60 | 3,4 | 33,14 | 36,86 | 45,6  | 16,81 | 20,05 | 0,838 | 1,909 |
| 61 | 4,4 | 23,72 | 35,21 | 43,19 | 15,21 | 20    | 0,76  | 1,831 |
| 62 | 5,3 | 12,43 | 40,27 | 44,35 | 17,86 | 22,41 | 0,796 | 2,062 |
| 63 |     | 11    |       |       |       |       |       |       |
| 64 | 3,7 | 21,86 |       |       |       |       |       |       |
| 65 | 5,9 | 34,72 |       |       |       |       |       |       |

|    |     |       |       |       |       |       |       |       |
|----|-----|-------|-------|-------|-------|-------|-------|-------|
| 66 | 3,8 | 28,14 | 33,72 | 43,35 | 14,62 | 19,1  | 0,765 | 1,688 |
| 67 | 4,4 | 30,57 |       |       |       |       |       |       |
| 68 | 4,1 | 22,72 | 32,29 | 41,87 | 13,52 | 18,77 | 0,72  | 1,712 |
| 69 | 4,1 | 36,72 | 36,41 | 43,47 | 15,83 | 20,58 | 0,769 | 1,794 |
| 70 | 4,7 | 36,28 | 34,92 | 43,52 | 15,2  | 19,72 | 0,77  | 2,031 |
| 71 | 3,6 | 34    | 36,83 | 45,88 | 16,9  | 19,93 | 0,847 | 1,807 |
| 72 | 3,2 | 37,28 |       |       |       |       |       |       |
| 73 | 4,6 | 26,57 | 32,03 | 43,74 | 14,01 | 18,02 | 0,777 | 1,691 |
| 74 | 4,2 | 40    |       |       |       |       |       |       |
| 75 | 2,8 | 34,43 | 27,57 | 40,04 | 11,04 | 16,53 | 0,667 | 1,563 |
| 76 | 3,5 | 31,86 | 40,64 | 46,62 | 18,95 | 21,69 | 0,873 | 2,16  |
| 77 | 4,1 | 30    | 34,26 | 43,63 | 14,95 | 19,31 | 0,774 | 1,765 |
| 78 | 6,3 | 33    | 39,39 | 43,79 | 17,25 | 22,14 | 0,779 | 2,04  |
| 79 | 4,5 | 34,14 |       |       |       |       |       |       |
| 80 | 4,1 | 13,43 | 35,54 | 43,78 | 15,56 | 19,98 | 0,778 | 1,78  |
| 81 | 4   | 25,14 |       |       |       |       |       |       |
| 82 | 4,1 | 19,86 | 35,13 | 43,12 | 15,15 | 19,98 | 0,758 | 1,807 |
| 83 | 3,9 | 40,43 |       |       |       |       |       |       |
| 84 | 3,7 | 20,86 | 41,21 | 44,84 | 18,48 | 22,73 | 0,813 | 2,13  |
| 85 | 3,9 | 12    | 40,06 | 44    | 17,63 | 22,43 | 0,786 | 2,14  |
| 86 | 4,6 | 28,86 | 35,97 | 44,28 | 15,93 | 20,04 | 0,794 | 1,892 |
| 87 | 4,9 | 30,28 | 31,64 | 41,52 | 13,14 | 18,5  | 0,71  | 1,741 |
| 88 | 4,6 | 33,72 | 31,14 | 39,21 | 12,21 | 18,93 | 0,645 | 1,788 |
| 89 | 4,5 | 34,72 |       |       |       |       |       |       |
| 90 | 4,4 | 21,72 |       |       |       |       |       |       |
| 91 | 5,1 | 29,28 |       |       |       |       |       |       |
| 92 | 4,4 | 21,28 |       |       |       |       |       |       |
| 93 | 4   | 41,14 |       |       |       |       |       |       |
| 94 | 4,3 | 20,86 | 39,5  | 45,51 | 17,98 | 21,52 | 0,835 | 2,008 |
| 95 | 4,2 | 30,14 | 32,18 | 44,34 | 14,27 | 17,91 | 0,796 | 1,772 |
| 96 | 3,5 | 38,28 |       |       |       |       |       |       |
| 97 |     | 37,43 | 46,77 | 48,85 | 22,85 | 23,92 | 0,955 | 2,224 |
| 98 | 4,1 | 39,14 |       |       |       |       |       |       |

|     |     |       |       |       |       |       |       |       |
|-----|-----|-------|-------|-------|-------|-------|-------|-------|
| 99  | 4,4 | 30,72 | 33,6  | 43,24 | 14,53 | 19,07 | 0,761 | 1,741 |
| 100 | 4,3 | 36,72 | 39,55 | 44,98 | 17,79 | 21,76 | 0,817 | 2,068 |
| 101 | 4,7 | 20,86 | 33,58 | 41,45 | 13,92 | 19,66 | 0,708 | 1,822 |
| 102 | 5,7 | 32,43 | 38,01 | 44,98 | 17,1  | 20,91 | 0,817 | 1,931 |
| 103 | 4,3 | 39    |       |       |       |       |       |       |
| 104 | 3,7 | 35,43 |       |       |       |       |       |       |
| 105 | 3   | 13,28 | 27,79 | 40,05 | 11,13 | 16,66 | 0,668 | 1,476 |
| 106 | 3,2 | 12,14 | 25,11 | 38,98 | 9,79  | 15,32 | 0,639 | 1,429 |
| 107 | 3,3 | 21,86 | 27,56 | 42,52 | 11,72 | 15,84 | 0,739 | 1,485 |
| 108 | 3,6 | 39    | 34,25 | 44,17 | 15,13 | 19,12 | 0,791 | 1,695 |
| 109 | 5   | 24,28 | 77,02 | 45,24 | 16,75 | 20,27 | 0,826 | 2,108 |
| 110 | 4,3 | 36,28 | 37,61 | 44,77 | 16,84 | 20,77 | 0,81  | 2,19  |
| 111 | 4,9 | 21    | 33,62 | 44,52 | 14,97 | 18,65 | 0,802 | 1,673 |
| 112 | 4   | 13,86 | 31,67 | 42,87 | 13,58 | 18,09 | 0,75  | 1,624 |
| 113 | 4,9 | 30,72 |       |       |       |       |       |       |
| 114 | 4,1 | 25,43 | 35,43 | 43,63 | 15,46 | 19,97 | 0,774 | 1,791 |
| 115 | 4,1 | 29,72 | 31,74 | 43,69 | 13,87 | 17,87 | 0,776 | 1,7   |
| 116 | 3,7 | 30    | 35,15 | 45,37 | 15,95 | 19,2  | 0,83  | 1,862 |
| 117 | 3,6 | 23,57 | 35,91 | 45,22 | 16,24 | 19,67 | 0,825 | 1,776 |
| 118 | 4,7 | 35,14 | 44,15 | 47,74 | 21,08 | 23,07 | 0,913 | 2,053 |
| 119 | 3,8 | 29    | 37,7  | 44,29 | 16,7  | 21    | 0,795 | 2,014 |
| 120 | 5,5 | 32,28 | 37,96 | 46,91 | 17,81 | 20,15 | 0,883 | 2,003 |
| 121 | 4,5 | 32,57 | 33,71 | 42,8  | 14,43 | 19,28 | 0,748 | 1,84  |
| 122 | 4,1 | 21,57 | 41,01 | 43,79 | 17,96 | 23,05 | 0,779 | 2,238 |
| 123 | 4,5 | 31,72 |       |       |       |       |       |       |
| 124 | 5   | 20,57 | 37,01 | 45,25 | 16,75 | 20,26 | 0,826 | 1,955 |
| 125 |     | 14,28 |       |       |       |       |       |       |
| 126 | 4,2 | 29    |       |       |       |       |       |       |
| 127 | 4,5 | 13    |       |       |       |       |       |       |
| 128 | 4,4 | 21,14 |       |       |       |       |       |       |
| 129 | 3,7 | 36,43 |       |       |       |       |       |       |
| 130 | 3,5 | 12,57 | 33,89 | 41,45 | 14,05 | 19,84 | 0,708 | 1,918 |
| 131 |     | 12,86 |       |       |       |       |       |       |

|     |     |       |       |       |       |       |       |       |
|-----|-----|-------|-------|-------|-------|-------|-------|-------|
| 132 | 4,2 | 20,43 | 34,27 | 41,23 | 14,13 | 20,14 | 0,701 | 1,93  |
| 133 | 4,2 | 31,72 | 36,15 | 44,78 | 16,19 | 19,96 | 0,811 | 1,92  |
| 134 | 3,9 | 33,86 |       |       |       |       |       |       |
| 135 | 4,7 | 37,43 | 34,38 | 45,81 | 15,75 | 18,63 | 0,845 | 1,683 |
| 136 | 3,7 | 37,43 | 43,77 | 48,34 | 21,16 | 22,61 | 0,935 | 2,091 |
| 137 | 4,4 | 33,14 |       |       |       |       |       |       |
| 138 | 5,2 | 20,28 | 34,28 | 44,07 | 15,11 | 19,17 | 0,788 | 1,825 |
| 139 | 5,1 | 33,72 | 41,82 | 46,07 | 19,27 | 22,55 | 0,854 | 2,079 |
| 140 | 4   | 32,14 | 37,14 | 45,23 | 16,8  | 20,34 | 0,825 | 1,902 |
| 141 | 3,9 | 39,14 |       |       |       |       |       |       |
| 142 | 4,4 | 25,57 |       |       |       |       |       |       |
| 143 | 6,3 | 32,14 | 39,18 | 45,02 | 17,64 | 21,54 | 0,818 | 2,062 |
| 144 | 4,2 | 12,28 | 33,92 | 43,45 | 14,74 | 19,18 | 0,768 | 1,809 |
| 145 | 5,1 | 20,28 | 35,34 | 44,51 | 15,73 | 19,61 | 0,802 | 1,83  |
| 146 |     | 12,72 |       |       |       |       |       |       |
| 147 | 5,2 | 32,28 | 34,87 | 42,58 | 14,85 | 20,02 | 0,741 | 1,897 |
| 148 | 5,6 | 34,72 |       |       |       |       |       |       |
| 149 | 4,9 | 33,28 | 51,86 | 49,01 | 25,42 | 26,44 | 0,961 | 2,423 |
| 150 | 4,1 | 19,72 |       |       |       |       |       |       |
| 151 | 4,8 | 40    |       |       |       |       |       |       |
| 152 | 4,2 | 34,14 | 36,99 | 43,11 | 15,95 | 21,04 | 0,758 | 2,061 |
| 153 | 4,5 | 25    | 31,54 | 44,13 | 13,92 | 17,62 | 0,79  | 1,752 |
| 154 | 4,2 | 24    | 37,24 | 43,55 | 16,22 | 21,02 | 0,771 | 2,04  |
| 155 | 3,8 | 29,86 | 33,59 | 45,84 | 15,4  | 18,19 | 0,846 | 1,642 |
| 156 | 5,3 | 29,57 | 35,81 | 42,39 | 15,18 | 20,63 | 0,735 | 1,991 |
| 157 |     | 12,28 |       |       |       |       |       |       |
| 158 | 4,5 | 21    | 28,93 | 42,37 | 12,26 | 16,67 | 0,735 | 1,567 |
| 159 | 4,2 | 13    | 28,11 | 41,51 | 11,67 | 16,44 | 0,709 | 1,529 |
| 160 | 4,7 | 13,43 | 32,11 | 42,22 | 13,56 | 18,55 | 0,73  | 1,715 |
| 161 | 4,7 | 18,86 | 33,95 | 43,32 | 14,71 | 19,24 | 0,764 | 1,741 |
| 162 | 3,7 | 20,14 | 36,53 | 42,78 | 15,63 | 20,9  | 0,747 | 1,938 |
| 163 | 3,9 | 12,28 | 35,77 | 42,4  | 15,17 | 20,6  | 0,736 | 1,886 |
| 164 | 5,3 | 20    | 39,32 | 46,41 | 18,25 | 21,07 | 0,866 | 2,056 |

|     |     |       |       |       |       |       |       |       |
|-----|-----|-------|-------|-------|-------|-------|-------|-------|
| 165 | 4,6 | 11,57 | 38,29 | 44,99 | 17,23 | 21,06 | 0,818 | 2,048 |
| 166 | 3,4 | 28,72 | 35,69 | 43,79 | 15,63 | 20,06 | 0,779 | 2,003 |
| 167 | 3,4 | 20    | 34,62 | 43,67 | 15,12 | 19,5  | 0,775 | 1,942 |
| 168 |     | 11,72 |       |       |       |       |       |       |
| 169 | 4,4 | 34,14 |       |       |       |       |       |       |
| 170 | 4,8 | 20,14 | 30,91 | 42,89 | 13,26 | 17,65 | 0,751 | 1,577 |
| 171 | 3,5 | 12,86 | 29,93 | 41,95 | 12,45 | 17,48 | 0,712 | 1,534 |
| 172 | 4,3 | 25,43 | 36,55 | 43,55 | 15,92 | 20,63 | 0,771 | 1,909 |
| 173 | 4,6 | 18,86 | 37,43 | 44,24 | 16,56 | 20,87 | 0,793 | 1,956 |
| 174 | 4,9 | 25,28 | 34,42 | 46,07 | 15,86 | 18,56 | 0,854 | 1,73  |
| 175 |     | 13,14 |       |       |       |       |       |       |
| 176 |     | 35,14 |       |       |       |       |       |       |
| 177 | 4,3 | 25,86 | 29,1  | 43,6  | 12,69 | 16,41 | 0,773 | 1,604 |
| 178 | 4,5 | 13,14 | 33,15 | 40,87 | 13,55 | 19,6  | 0,691 | 1,778 |
| 179 | 4,4 | 30    | 34,9  | 41,77 | 14,58 | 20,32 | 0,72  |       |
| 180 | 4,4 | 20    | 33,46 | 42,13 | 14,1  | 19,36 | 0,73  |       |
| 181 | 4,2 | 30    | 32,97 | 43,88 | 14,47 | 18,5  | 0,782 | 1,901 |
| 182 | 4,1 | 15,43 | 33,88 | 44,71 | 15,15 | 18,73 | 0,808 | 1,722 |
| 183 | 4,2 | 26,57 | 29,14 | 41    | 11,95 | 17,19 | 0,695 | 1,618 |
| 184 | 4   | 36    |       |       |       |       |       |       |
| 185 | 4,5 | 29,86 |       |       |       |       |       |       |
| 186 | 4,4 | 27,57 | 40,36 | 46,38 | 18,72 | 21,64 | 0,865 | 2,021 |
| 187 | 4,1 | 34,86 |       |       |       |       |       |       |
| 188 | 4,2 | 15,43 | 37,95 | 44,95 | 17,06 | 20,89 | 0,816 | 2,064 |
| 189 | 5,6 | 32,86 | 34,91 | 42,45 | 14,82 | 20,09 | 0,737 | 1,895 |
| 190 | 4,2 | 26,86 |       |       |       |       |       |       |
| 191 | 3,2 | 33,43 |       |       |       |       |       |       |
| 192 | 3   | 40,72 | 36,19 | 45,17 | 16,35 | 19,84 | 0,824 | 1,898 |
| 193 |     | 11,57 |       |       |       |       |       |       |
| 194 |     | 11    |       |       |       |       |       |       |
| 195 | 4,2 | 29,86 |       |       |       |       |       |       |
| 196 | 3,6 | 11,86 | 28,13 | 41,69 | 11,73 | 16,4  | 0,715 | 1,505 |
| 197 | 4,6 | 20,43 | 28,78 | 42,18 | 12,14 | 16,64 | 0,729 | 1,548 |

|     |     |       |       |       |       |       |       |       |
|-----|-----|-------|-------|-------|-------|-------|-------|-------|
| 198 |     | 32,28 |       |       |       |       |       |       |
| 199 | 5,9 | 29,57 | 38,67 | 45,35 | 17,54 | 21,13 | 0,83  | 1,929 |
| 200 | 4,8 | 27,57 |       |       |       |       |       |       |
| 201 | 4,3 | 33,43 | 35,43 | 42,95 | 15,22 | 20,21 | 0,753 | 1,924 |
| 202 | 3,7 | 19,86 | 33,93 | 42,29 | 14,35 | 19,58 | 0,732 | 1,823 |
| 203 | 3,8 | 12,86 | 33,57 | 42,18 | 14,16 | 19,41 | 0,729 | 1,783 |
| 204 | 3,4 | 32,43 | 47,67 | 49,25 | 23,48 | 24,19 | 0,97  | 2,224 |
| 205 | 4,3 | 27,57 |       |       |       |       |       |       |
| 206 |     | 20,43 | 41,43 | 45,73 | 18,95 | 22,48 | 0,842 | 2,164 |
| 207 | 4,9 | 13    | 40,7  | 44,32 | 18,04 | 22,66 | 0,796 | 2,153 |
| 208 | 4,3 | 26,57 | 39,09 | 44,48 | 17,39 | 21,7  | 0,801 | 2,096 |
| 209 | 4,8 | 28,72 | 39,03 | 46,09 | 17,99 | 21,04 | 0,855 | 2,043 |
| 210 | 3,7 | 37,86 | 34,94 | 43,04 | 15,04 | 19,9  | 0,755 | 1,864 |
| 211 | 4,7 | 36,14 |       |       |       |       |       |       |
| 212 | 4   | 28,28 | 37,71 | 44,41 | 16,75 | 20,96 | 0,799 | 2,003 |
| 213 | 3,3 | 31    | 33,25 | 44,75 | 14,88 | 18,37 | 0,81  | 1,781 |
| 214 | 4,3 | 26    | 32,54 | 44,74 | 14,56 | 17,98 | 0,809 | 1,766 |
| 215 | 4,9 | 14    | 39,97 | 45,55 | 18,21 | 21,76 | 0,836 | 2,097 |
| 216 | 5,9 | 20,28 | 41,84 | 46,41 | 19,42 | 22,42 | 0,866 | 2,151 |
| 217 | 3,7 | 33,28 |       |       |       |       |       |       |
| 218 | 4,8 | 37,14 | 35,57 | 44,75 | 15,92 | 19,65 | 0,81  | 1,879 |
| 219 | 4,5 | 12,14 | 31,21 | 41,49 | 12,95 | 18,26 | 0,709 | 1,692 |
| 220 | 4,1 | 18,86 | 31,58 | 42,43 | 13,4  | 18,18 | 0,737 | 1,741 |
| 221 | 3,9 | 32,14 |       |       |       |       |       |       |
| 222 | 3,6 | 34,14 | 43,16 | 45,34 | 19,57 | 23,59 | 0,829 | 2,263 |
| 223 | 5,7 | 25    | 35,31 | 44,29 | 15,64 | 19,67 | 0,795 | 1,795 |
| 224 | 3,9 | 34,72 |       |       |       |       |       |       |
| 225 | 4,5 | 38,72 |       |       |       |       |       |       |
| 226 | 3,6 | 34,86 | 34,43 | 42,89 | 14,77 | 10,66 | 0,751 | 1,77  |
| 227 | 4   | 35    |       |       |       |       |       |       |
| 228 | 2,8 | 38,28 | 43,75 | 49,32 | 21,58 | 22,17 | 0,973 | 2,192 |
| 229 | 4,4 | 34    |       |       |       |       |       |       |
| 230 | 4,8 | 24,14 |       |       |       |       |       |       |



|     |     |       |       |       |       |       |       |       |
|-----|-----|-------|-------|-------|-------|-------|-------|-------|
| 231 | 6,3 | 30,86 | 41,44 | 42,8  | 17,74 | 23,7  | 0,748 | 2,537 |
| 232 | 5,8 | 10,86 | 40,54 | 43,61 | 17,68 | 22,86 | 0,773 | 2,275 |
| 233 | 5,3 | 25,86 | 39,73 | 42,81 | 17,01 | 22,72 | 0,748 | 2,316 |
| 234 |     | 12,86 |       |       |       |       |       |       |
| 235 | 4   | 32    | 55,23 | 58,15 | 32,12 | 23,11 | 1,389 | 2,235 |
| 236 | 5,9 | 31,72 | 44,54 | 47,21 | 21,03 | 23,51 | 0,894 | 2,203 |
| 237 | 4,3 | 20,43 | 49,61 | 46,92 | 23,28 | 26,33 | 0,884 | 2,589 |
| 238 | 3,7 | 12,43 | 52,27 | 44,21 | 23,11 | 29,16 | 0,792 | 2,612 |
| 239 |     | 11,57 |       |       |       |       |       |       |
| 240 | 4,6 | 28    | 36,81 | 45,63 | 16,8  | 20,01 | 0,839 | 2,026 |
| 241 | 4,4 | 35,57 | 31,29 | 42,98 | 13,45 | 17,84 | 0,753 | 1,68  |
| 242 | 3,8 | 22    | 42,35 | 44,39 | 18,8  | 23,55 | 0,798 | 2,278 |
| 243 | 3,3 | 12    | 38,52 | 44,75 | 17,24 | 21,28 | 0,81  | 2,097 |
| 244 | 4,5 | 32,43 |       |       |       |       |       |       |
| 245 | 3,8 | 27,43 |       |       |       |       |       |       |
| 246 | 3,6 | 35,28 |       |       |       |       |       |       |
| 247 | 5,5 | 35    | 42,48 | 47,59 | 20,22 | 22,26 | 0,908 | 2,055 |
| 248 | 5,3 | 23,43 |       |       |       |       |       |       |
| 249 | 6   | 21,72 | 36,73 | 43,3  | 15,87 | 20,86 | 0,76  | 2,015 |
| 250 | 3,1 | 34,86 | 42,33 | 48,68 | 20,61 | 21,72 | 0,948 | 2,111 |
| 251 | 4,5 | 19,72 | 32,68 | 43,6  | 14,25 | 18,43 | 0,773 | 1,697 |
| 252 | 3,9 | 11,28 | 37,87 | 43,59 | 16,51 | 21,36 | 0,772 | 1,67  |
| 253 | 4,5 | 19,72 | 34,59 | 43,01 | 14,88 | 19,71 | 0,754 | 1,802 |
| 254 | 4,1 | 11,72 | 34,25 | 42,91 | 14,7  | 19,55 | 0,751 | 1,721 |
| 255 | 4,8 | 20,57 | 31,74 | 41,49 | 13,17 | 18,57 | 0,709 | 1,683 |
| 256 | 4   | 10,43 | 30,39 | 39,84 | 12,11 | 18,28 | 0,662 | 1,649 |
| 257 | 4,3 | 13,14 | 32,18 | 43,84 | 14,11 | 18,07 | 0,78  | 1,736 |
| 258 | 4,1 | 13    | 36,6  | 45,24 | 16,56 | 20,04 | 0,826 | 2,013 |
| 259 | 4,8 | 23,57 |       |       |       |       |       |       |
| 260 | 3,8 | 32,28 |       |       |       |       |       |       |
| 261 | 3,7 | 20,43 |       |       |       |       |       |       |
| 262 | 4,7 | 23,72 | 34,95 | 45,89 | 16,04 | 18,91 | 0,848 | 1,732 |
| 263 | 4,3 | 21,14 | 34,63 | 42,7  | 14,78 | 19,85 | 0,744 | 1,932 |

|     |     |       |       |       |       |       |       |       |
|-----|-----|-------|-------|-------|-------|-------|-------|-------|
| 264 | 3,6 | 12,86 | 35,16 | 43,65 | 15,35 | 19,81 | 0,774 | 1,92  |
| 265 | 3,9 | 11    | 38,17 | 44,53 | 17    | 21,17 | 0,803 | 2,044 |
| 266 | 3,9 | 21,28 | 32,81 | 43,58 | 14,3  | 18,51 | 0,772 | 1,7   |
| 267 | 3,5 | 12,43 | 32,38 | 42,8  | 13,86 | 18,52 | 0,748 | 1,68  |
| 268 | 4,1 | 12,57 | 37,7  | 46,89 | 17,68 | 20,02 | 0,883 | 1,834 |
| 269 | 4,4 | 19,72 | 38,52 | 47,09 | 18,14 | 20,38 | 0,89  | 1,859 |
| 270 | 3,6 | 20,57 | 33,39 | 45,37 | 15,15 | 18,24 | 0,83  | 1,678 |
| 271 | 3,7 | 11,72 | 30,33 | 42,49 | 12,89 | 17,44 | 0,739 | 1,609 |
| 272 | 3,8 | 21,72 | 34,19 | 42,81 | 14,64 | 19,55 | 0,748 | 1,876 |
| 273 | 3,9 | 12    | 32,77 | 42,35 | 13,88 | 18,89 | 0,734 | 1,812 |
| 274 | 4,7 | 20,72 | 30,2  | 43,9  | 13,26 | 16,94 | 0,782 | 1,577 |
| 275 | 4,2 | 12,14 | 28,85 | 43,05 | 12,42 | 16,43 | 0,755 | 1,52  |
| 276 | 3,5 | 20,28 | 33,6  | 43,24 | 14,53 | 19,07 | 0,761 | 1,861 |
| 277 | 4,1 | 12,28 | 32,85 | 43,65 | 14,34 | 18,51 | 0,774 | 1,763 |
| 278 | 5,2 | 20,43 | 39,39 | 46,58 | 18,35 | 21,04 | 0,872 | 1,967 |
| 279 | 4,7 | 12,28 | 35,75 | 44    | 15,73 | 20,02 | 0,785 | 1,881 |
| 280 | 4,7 | 12,28 | 37,33 | 45,19 | 16,87 | 20,46 | 0,824 | 1,881 |
| 281 | 5,9 | 20    | 38,61 | 45,63 | 17,62 | 20,99 | 0,839 | 1,955 |
| 282 | 3   | 21,28 | 40,41 | 46,69 | 18,87 | 21,54 | 0,876 | 2,228 |
| 283 | 3,5 | 12,28 | 37,94 | 45,54 | 17,28 | 20,66 | 0,836 | 2,125 |
| 284 | 4,3 | 22,14 | 34,37 | 42,24 | 14,52 | 19,85 | 0,731 | 1,926 |
| 285 | 4,9 | 11,57 | 32,87 | 41,8  | 13,74 | 19,13 | 0,718 | 1,852 |
| 286 | 3,9 | 12,28 | 38,5  | 43,81 | 16,87 | 21,63 | 0,779 | 1,883 |
| 287 | 4,2 | 20,28 | 39,56 | 43,85 | 17,35 | 22,21 | 0,781 | 1,903 |
| 288 | 3,7 | 20,43 | 35,11 | 46,93 | 16,48 | 18,63 | 0,884 | 1,745 |
| 289 | 3,7 | 13,57 | 34,51 | 47,2  | 16,29 | 18,22 | 0,894 | 1,712 |
| 290 | 4   | 20,72 | 35,99 | 43,73 | 15,74 | 20,25 | 0,777 | 1,997 |
| 291 | 3,8 | 11,57 | 33,45 | 42,18 | 14,11 | 19,34 | 0,729 | 1,926 |
| 292 | 3,7 | 12    | 32,08 | 43,7  | 14,02 | 18,06 | 0,776 | 1,67  |
| 293 | 4,6 | 20    |       |       |       |       |       |       |
| 294 | 4,9 | 19,72 | 37,78 | 45,57 | 17,22 | 20,56 | 0,837 | 1,883 |
| 295 | 4,6 | 11,72 | 34,8  | 43,47 | 15,13 | 19,67 | 0,769 | 1,833 |
| 296 | 4,2 | 11,57 | 32,85 | 42,49 | 13,96 | 18,89 | 0,739 | 1,798 |

|     |     |       |       |       |       |       |       |       |
|-----|-----|-------|-------|-------|-------|-------|-------|-------|
| 297 | 5   | 19,14 | 33,63 | 43,14 | 14,51 | 19,12 | 0,758 | 1,86  |
| 298 | 3,6 | 19,86 | 26,9  | 39,7  | 10,68 | 16,22 | 0,658 | 1,549 |
| 299 | 3,9 | 12,28 | 24,85 | 38,14 | 9,48  | 15,37 | 0,616 | 1,489 |
| 300 | 6,6 | 12,14 | 38,83 | 43,34 | 16,83 | 22    | 0,765 | 2,091 |
| 301 | 4,8 | 20    | 39,28 | 43,45 | 17,07 | 22,21 | 0,768 | 2,103 |
| 302 | 5,1 | 20,14 | 29,95 | 40,06 | 12    | 17,95 | 0,668 | 1,685 |
| 303 | 4,6 | 12,14 | 29,5  | 40,03 | 11,81 | 17,69 | 0,667 | 1,672 |
| 304 | 4,2 | 20,86 | 33,97 | 43,62 | 14,82 | 19,15 | 0,773 | 1,736 |
| 305 | 4,5 | 12,86 | 32,43 | 42,79 | 13,88 | 18,55 | 0,748 | 1,668 |
| 306 | 4   | 12    | 36    | 43,33 | 15,6  | 20,4  | 0,764 | 1,812 |
| 307 | 4,9 | 20    | 36,76 | 44,45 | 16,34 | 20,42 | 0,8   | 1,865 |
| 308 | 4,8 | 14,43 | 34,39 | 44,75 | 15,39 | 19    | 0,81  | 1,776 |
| 309 | 3,8 | 21,28 | 35,45 | 43,75 | 15,51 | 19,94 | 0,777 | 1,786 |
| 310 | 3,9 | 12,14 | 34,08 | 42,84 | 14,6  | 19,48 | 0,749 | 1,692 |
| 311 | 3,9 | 11,57 | 29,81 | 42,53 | 12,68 | 17,13 | 0,74  | 1,687 |
| 312 | 4,4 | 19,28 | 30,63 | 43,02 | 13,18 | 17,45 | 0,755 | 1,745 |
| 313 | 4,2 | 11,86 | 31,14 | 41,84 | 13,03 | 18,11 | 0,719 | 1,762 |
| 314 | 4,9 | 21,43 |       |       |       |       |       |       |
| 315 | 3,5 | 20,14 | 32,62 | 42,61 | 13,9  | 18,72 | 0,742 | 1,829 |
| 316 | 4   | 12    | 31,47 | 42    | 13,22 | 18,25 | 0,724 | 1,778 |
| 317 | 3,7 | 12    | 37,43 | 45,15 | 16,9  | 20,53 | 0,823 | 1,877 |
| 318 | 3,7 | 21    | 38,8  | 46,23 | 17,94 | 20,86 | 0,86  | 1,889 |
| 319 | 4,2 | 13,72 | 43,11 | 46,27 | 19,95 | 23,16 | 0,861 | 2,318 |
| 320 | 3,7 | 18,28 | 43,16 | 46,58 | 20,1  | 23,05 | 0,872 | 2,318 |
| 321 | 3,8 | 11,28 | 32,29 | 42,55 | 13,74 | 18,55 | 0,74  | 1,647 |
| 322 | 4,5 | 20,57 | 30,19 | 42,19 | 12,74 | 17,45 | 0,73  | 1,58  |
| 323 | 4,1 | 11,57 | 30,54 | 42,43 | 12,96 | 17,58 | 0,737 | 1,552 |
| 324 | 4,7 | 20,72 | 38,53 | 43,83 | 16,89 | 21,64 | 0,78  | 2,015 |
| 325 | 3,8 | 10,72 | 36,98 | 42,88 | 15,86 | 21,12 | 0,75  | 1,979 |
| 326 | 4,9 | 13,14 | 35,87 | 44,68 | 16,03 | 19,84 | 0,807 | 1,8   |
| 327 | 4,5 | 20,28 | 34,66 | 44,14 | 15,3  | 19,36 | 0,79  | 1,768 |
| 328 | 3,9 | 13,43 | 33,85 | 43,92 | 14,87 | 18,98 | 0,783 | 1,703 |
| 329 | 3,4 | 12,43 | 31,91 | 41,89 | 13,37 | 18,54 | 0,721 | 1,673 |

|     |     |       |       |       |       |       |       |       |
|-----|-----|-------|-------|-------|-------|-------|-------|-------|
| 330 | 5   | 21,43 | 31,07 | 44,54 | 13,84 | 17,23 | 0,803 | 1,652 |
| 331 | 3,8 | 12,72 | 30,9  | 44,3  | 13,69 | 17,21 | 0,795 | 1,593 |
| 332 | 5   | 30,86 | 33,53 | 44,61 | 14,96 | 18,57 | 0,805 | 1,811 |
| 333 | 3,5 | 12,14 | 29,99 | 42,28 | 12,68 | 17,31 | 0,732 | 1,644 |
| 334 | 6,3 | 20,14 | 37,39 | 44,15 | 16,51 | 20,88 | 0,79  | 1,985 |
| 335 | 4,9 | 12    | 38,49 | 45,44 | 17,49 | 21    | 0,832 | 1,985 |
| 336 | 4,1 | 20,14 | 34,56 | 44,87 | 15,51 | 19,05 | 0,814 | 1,776 |
| 337 | 4,2 | 11,57 | 34,01 | 43,98 | 14,96 | 19,05 | 0,785 | 1,776 |
| 338 | 4,1 | 12,14 |       |       |       |       |       |       |
| 339 | 3,6 | 12,28 | 35,97 | 44,78 | 16,11 | 19,86 | 0,811 | 1,762 |
| 340 | 3,9 | 20,28 | 37,23 | 46,03 | 17,14 | 20,09 | 0,853 | 1,841 |
| 341 | 5,1 | 21,28 | 34,28 | 44,25 | 15,17 | 19,11 | 0,793 | 1,811 |
| 342 | 4,5 | 11,72 | 34,44 | 44,54 | 15,34 | 19,1  | 0,803 | 1,785 |
| 343 | 3,6 | 14,43 | 31,4  | 40,7  | 12,78 | 18,62 | 0,686 | 1,674 |
| 344 | 4,1 | 19,57 | 32,64 | 41,54 | 13,56 | 19,08 | 0,71  | 1,707 |
| 345 | 3,8 | 20,14 | 33,67 | 44,43 | 14,96 | 18,71 | 0,799 | 1,712 |
| 346 | 3,7 | 12,14 | 32,48 | 44,08 | 14,32 | 18,16 | 0,788 | 1,644 |
| 347 | 3,6 | 20,43 |       |       |       |       |       |       |
| 348 | 3,6 | 12,86 | 35,28 | 42,65 | 15,05 | 20,23 | 0,743 | 1,839 |
| 349 | 3,7 | 11,57 | 32,75 | 42,59 | 13,95 | 18,8  | 0,742 | 1,702 |
| 350 | 4,4 | 19    | 31,62 | 41,99 | 13,28 | 18,34 | 0,724 | 1,72  |
| 351 | 3,9 | 13,28 | 31,46 | 40,94 | 12,88 | 18,58 | 0,693 | 1,697 |
| 352 | 4,5 | 20,28 | 32,69 | 42,45 | 13,88 | 18,81 | 0,737 | 1,724 |
| 353 | 3,6 | 12,43 | 29,04 | 41,25 | 11,98 | 17,06 | 0,702 | 1,611 |
| 354 | 4,2 | 19,28 | 29,42 | 41,12 | 12,1  | 17,32 | 0,698 | 1,611 |
| 355 | 3,8 | 20,28 | 29,62 | 42,8  | 12,68 | 16,94 | 0,748 | 1,526 |
| 356 | 2,9 | 13,28 | 28,18 | 41,8  | 11,78 | 16,4  | 0,718 | 1,501 |
| 357 |     | 13    |       |       |       |       |       |       |
| 358 |     | 11,86 |       |       |       |       |       |       |
| 359 |     | 10    |       |       |       |       |       |       |
| 360 |     | 8,14  |       |       |       |       |       |       |
| 361 |     | 12,43 |       |       |       |       |       |       |
| 362 |     | 12    |       |       |       |       |       |       |

|     |     |       |       |       |       |       |       |       |
|-----|-----|-------|-------|-------|-------|-------|-------|-------|
| 363 |     | 12,43 |       |       |       |       |       |       |
| 364 |     | 13,14 |       |       |       |       |       |       |
| 365 |     | 12    |       |       |       |       |       |       |
| 366 |     | 12,57 |       |       |       |       |       |       |
| 367 |     | 11    |       |       |       |       |       |       |
| 368 |     | 12,72 |       |       |       |       |       |       |
| 369 |     | 11,57 |       |       |       |       |       |       |
| 370 |     | 13,43 |       |       |       |       |       |       |
| 371 |     | 13,72 |       |       |       |       |       |       |
| 372 |     | 12    |       |       |       |       |       |       |
| 373 |     | 12    |       |       |       |       |       |       |
| 374 |     | 12,86 |       |       |       |       |       |       |
| 375 |     | 12,28 |       |       |       |       |       |       |
| 376 |     | 12,14 |       |       |       |       |       |       |
| 377 |     | 12,72 |       |       |       |       |       |       |
| 378 |     | 12    |       |       |       |       |       |       |
| 379 |     | 11,14 |       |       |       |       |       |       |
| 380 |     | 12,43 |       |       |       |       |       |       |
| 381 |     | 11,86 |       |       |       |       |       |       |
| 382 |     | 12,28 |       |       |       |       |       |       |
| 383 |     | 11,28 |       |       |       |       |       |       |
| 384 |     | 12,43 |       |       |       |       |       |       |
| 385 | 4,3 | 20,28 | 32,31 | 43,57 | 14,08 | 18,23 | 0,772 | 1,602 |
| 386 | 3,5 | 12,14 | 35,24 | 44,49 | 15,68 | 19,56 | 0,801 | 1,557 |
| 387 | 4,7 | 21,28 | 36,34 | 46,28 | 16,82 | 19,52 | 0,861 | 1,811 |
| 388 | 4   | 12,57 | 33,68 | 44,77 | 15,08 | 18,6  | 0,81  | 1,76  |
| 389 | 3,8 | 12    | 33,68 | 42,33 | 14,26 | 19,42 | 0,734 | 1,775 |
| 390 | 3,9 | 20,72 | 34,96 | 42,73 | 14,94 | 20,02 | 0,746 | 1,789 |
| 391 | 5,2 | 20,28 | 36,55 | 46,07 | 16,84 | 19,71 | 0,854 | 1,878 |
| 392 | 4,7 | 12,86 | 36,36 | 45,43 | 16,52 | 19,84 | 0,832 | 1,822 |
| 393 | 3,9 | 20,28 | 30,71 | 43,63 | 13,4  | 17,31 | 0,774 | 1,612 |
| 394 | 3,8 | 12,28 | 30,44 | 43,79 | 13,33 | 17,11 | 0,779 | 1,585 |
| 395 | 3,9 | 13,14 | 35,65 | 44,57 | 15,89 | 19,76 | 0,804 | 1,838 |

|     |     |       |       |       |       |       |       |       |
|-----|-----|-------|-------|-------|-------|-------|-------|-------|
| 396 | 4,3 | 20,14 | 37,14 | 46,17 | 17,15 | 19,99 | 0,857 | 1,82  |
| 397 | 3,9 | 19,86 | 32,55 | 43,62 | 14,2  | 18,35 | 0,773 | 1,844 |
| 398 | 4,3 | 12,86 | 32,67 | 42,82 | 13,99 | 18,68 | 0,748 | 1,82  |
| 399 | 4,2 | 12,43 | 33,13 | 44    | 14,58 | 18,55 | 0,785 | 1,733 |
| 400 | 4,3 | 20,43 | 34,64 | 45,09 | 15,62 | 19,02 | 0,821 | 1,798 |
| 401 | 4,2 | 12,43 | 43,03 | 48,08 | 20,69 | 22,34 | 0,926 | 2,106 |
| 402 | 5   | 19,57 | 40,94 | 47,19 | 19,32 | 21,62 | 0,893 | 2,067 |
| 403 | 4,9 | 11,86 | 38,58 | 46,24 | 17,84 | 20,74 | 0,86  | 1,979 |
| 404 | 5,2 | 14,14 | 34,93 | 43,88 | 15,33 | 19,6  | 0,782 | 1,751 |
| 405 |     | 11,43 |       |       |       |       |       |       |
| 406 |     | 11,57 |       |       |       |       |       |       |
| 407 |     | 12,72 |       |       |       |       |       |       |
| 408 |     | 13,14 |       |       |       |       |       |       |
| 409 |     | 13    |       |       |       |       |       |       |
| 410 |     | 12,57 |       |       |       |       |       |       |
| 411 |     | 12,43 |       |       |       |       |       |       |
| 412 |     | 12,14 |       |       |       |       |       |       |
| 413 |     | 9,86  |       |       |       |       |       |       |
| 414 |     | 12,43 |       |       |       |       |       |       |
| 415 |     | 12,14 |       |       |       |       |       |       |
| 416 |     | 11,86 |       |       |       |       |       |       |
| 417 | 4,1 | 37,14 |       |       |       |       |       |       |
| 418 | 4,6 | 20    | 28,56 | 42,43 | 12,12 | 16,44 | 0,737 | 1,566 |
| 419 | 3,9 | 12    | 28,5  | 43,22 | 12,32 | 16,18 | 0,761 | 1,51  |
| 420 |     | 12,14 |       |       |       |       |       |       |
| 421 | 4,6 | 19,57 | 29,16 | 40,53 | 11,82 | 17,34 | 0,681 | 1,678 |
| 422 | 4,3 | 11,72 | 29,3  | 40,71 | 11,93 | 17,37 | 0,686 | 1,658 |
| 423 |     | 12,86 |       |       |       |       |       |       |
| 424 | 4,1 | 12,14 | 31,26 | 41,17 | 12,87 | 18,39 | 0,699 | 1,656 |
| 425 |     | 19,57 | 31,22 | 41,57 | 12,98 | 18,24 | 0,711 | 1,69  |
| 426 |     | 12    |       |       |       |       |       |       |
| 427 |     | 11,57 |       |       |       |       |       |       |
| 428 |     | 12,14 |       |       |       |       |       |       |

|     |     |       |       |       |       |       |       |       |
|-----|-----|-------|-------|-------|-------|-------|-------|-------|
| 429 |     | 12    |       |       |       |       |       |       |
| 430 | 5,2 | 11,43 | 35,63 | 43,3  | 15,43 | 20,2  | 0,763 | 1,909 |
| 431 | 5,5 | 19    | 36,1  | 43,43 | 15,68 | 20,42 | 0,767 | 1,92  |
| 432 |     | 12,14 |       |       |       |       |       |       |
| 433 | 4,5 | 20,14 | 37,01 | 45,42 | 16,81 | 20,2  | 0,832 | 1,812 |
| 434 | 4,6 | 11,72 |       |       |       |       |       |       |
| 435 |     | 12    |       |       |       |       |       |       |
| 436 |     | 12    |       |       |       |       |       |       |
| 437 |     | 13,14 |       |       |       |       |       |       |
| 438 | 5,4 | 20,28 | 39,59 | 45,94 | 18,19 | 21,4  | 0,85  | 2,061 |
| 439 | 5   | 12,57 | 35,42 | 44,38 | 15,72 | 19,7  | 0,797 | 1,948 |
| 440 | 3,7 | 12,14 | 38,58 | 45,87 | 17,7  | 20,88 | 0,847 | 2,261 |
| 441 | 5,7 | 20,28 | 39,98 | 47,92 | 19,16 | 20,82 | 0,92  | 2,271 |
| 442 | 4,4 | 12,43 | 36,1  | 43,43 | 15,68 | 20,42 | 0,767 | 1,828 |
| 443 | 4,4 | 20,72 | 36,75 | 43,29 | 15,91 | 20,84 | 0,763 | 1,907 |
| 444 | 3,4 | 20,28 | 31,17 | 43,37 | 13,52 | 17,65 | 0,766 | 1,727 |
| 445 | 3,3 | 11,43 | 29,67 | 41,35 | 12,33 | 17,34 | 0,711 | 1,662 |
| 446 | 4,7 | 12,72 | 46,67 | 44,54 | 20,79 | 25,88 | 0,803 | 2,37  |
| 447 | 4,3 | 20,72 | 45    | 47,02 | 21,16 | 23,84 | 0,887 | 2,4   |
| 448 |     | 12,28 |       |       |       |       |       |       |
| 449 | 4,6 | 13,43 | 33,11 | 42,61 | 14,11 | 19    | 0,742 | 1,86  |
| 450 | 5   | 20,14 | 31,07 | 42,42 | 13,18 | 17,89 | 0,736 | 1,733 |
| 451 | 3,9 | 12,14 | 29,44 | 40,89 | 12,04 | 17,4  | 0,691 | 1,66  |
| 452 |     | 11,43 |       |       |       |       |       |       |
| 453 | 5,7 | 18,86 | 33,86 | 45,15 | 15,29 | 18,57 | 0,823 | 1,738 |
| 454 | 4,2 | 12,28 | 32,63 | 43,57 | 14,22 | 18,41 | 0,772 | 1,712 |
| 455 | 4,9 | 19,86 | 30,7  | 39,9  | 12,25 | 18,45 | 0,663 | 1,861 |
| 456 | 4,4 | 11,43 | 30,92 | 40,07 | 12,39 | 18,53 | 0,668 | 1,831 |
| 457 | 5,2 | 13,86 | 38,25 | 44,39 | 16,98 | 21,27 | 0,798 | 2,044 |
| 458 |     | 11,72 |       |       |       |       |       |       |
| 459 | 4,5 | 20,72 | 33,72 | 42,58 | 14,36 | 19,36 | 0,741 | 1,76  |
| 460 | 3,8 | 11,72 | 31,89 | 41,61 | 13,27 | 18,62 | 0,712 | 1,678 |
| 461 | 4,1 | 20,43 |       |       |       |       |       |       |

|     |     |       |       |       |       |       |       |       |
|-----|-----|-------|-------|-------|-------|-------|-------|-------|
| 462 | 4   | 13,57 | 32,03 | 43,64 | 13,98 | 18,05 | 0,774 | 1,686 |
| 463 | 4,1 | 20,28 | 31,32 | 43,64 | 13,67 | 17,65 | 0,774 | 1,632 |
| 464 | 3,5 | 10,86 | 30,43 | 40,91 | 12,45 | 17,98 | 0,692 | 1,505 |
| 465 | 5,4 | 12,43 | 39,01 | 44,55 | 17,38 | 21,63 | 0,803 | 2,032 |
| 466 | 5,2 | 18,72 | 41,8  | 46,22 | 19,32 | 22,48 | 0,859 | 2,068 |
| 467 |     | 11,56 | 41,96 | 44,51 | 18,68 | 23,28 | 0,802 | 2,16  |
| 468 | 4,7 | 20,14 | 38,45 | 45,64 | 17,55 | 20,9  | 0,839 | 1,852 |
| 469 | 3,7 | 12,14 | 36,88 | 44,95 | 16,58 | 20,3  | 0,816 | 1,813 |
| 470 | 4,1 | 12    | 34,01 | 42,78 | 14,55 | 19,46 | 0,747 | 1,823 |
| 471 | 4,8 | 19,86 | 33,63 | 42,69 | 14,36 | 19,27 | 0,745 | 1,862 |
| 472 | 4,6 | 19,86 | 29,38 | 40,02 | 11,76 | 17,62 | 0,667 | 1,626 |
| 473 | 3,8 | 12,28 | 29,41 | 40,15 | 11,81 | 17,6  | 0,671 | 1,582 |
| 474 | 2,9 | 12,14 | 28,4  | 41,33 | 11,74 | 16,66 | 0,704 | 1,563 |
| 475 | 3,3 | 20,14 | 29,99 | 42,68 | 12,8  | 17,19 | 0,744 | 1,648 |
| 476 | 4   | 11,43 | 28,15 | 41,98 | 11,82 | 16,33 | 0,723 | 1,475 |
| 477 | 3,9 | 12    | 33,74 | 44,72 | 15,09 | 18,65 | 0,809 | 1,826 |
| 478 | 4,6 | 20    | 34,68 | 45,47 | 15,77 | 18,91 | 0,833 | 1,861 |
| 479 | 3,9 | 19,43 | 28,27 | 41,77 | 11,81 | 16,46 | 0,717 | 1,49  |
| 480 |     | 11,86 |       |       |       |       |       |       |
| 481 | 4,7 | 20,43 | 29,77 | 41,48 | 12,35 | 17,42 | 0,708 | 1,549 |
| 482 | 4   | 12,43 | 35,65 | 44,54 | 15,88 | 19,77 | 0,803 | 1,628 |
| 483 | 4,2 | 12,28 | 29,61 | 42,99 | 12,73 | 16,88 | 0,754 | 1,49  |
| 484 |     | 12,28 |       |       |       |       |       |       |
| 485 | 3,8 | 11,57 | 28,44 | 40,47 | 11,51 | 16,93 | 0,679 | 1,578 |
| 486 |     | 11,14 |       |       |       |       |       |       |
| 487 | 4,4 | 20,57 | 29,76 | 41,8  | 12,44 | 17,32 | 0,718 | 1,606 |
| 488 | 3,8 | 12,72 | 32,6  | 44,53 | 14,52 | 18,08 | 0,803 | 1,49  |
| 489 | 4,1 | 20,86 | 33,35 | 45,27 | 15,1  | 18,25 | 0,827 | 1,527 |
| 490 | 4,5 | 11,86 |       |       |       |       |       |       |
| 491 | 5,1 | 19,86 | 35,2  | 42,99 | 15,13 | 20,07 | 0,753 | 1,866 |
| 492 | 4,8 | 18,28 | 32,59 | 41,91 | 13,66 | 18,93 | 0,721 | 1,831 |
| 493 | 4,3 | 12,57 | 32    | 41,21 | 13,19 | 18,81 | 0,701 | 1,805 |
| 494 | 4,3 | 19,57 | 29,71 | 42,37 | 12,59 | 17,12 | 0,735 | 1,581 |



|     |     |       |       |       |       |       |       |       |
|-----|-----|-------|-------|-------|-------|-------|-------|-------|
| 495 | 4,6 | 20    | 33,25 | 44,27 | 14,72 | 18,53 | 0,794 | 1,767 |
| 496 | 3,8 | 12,14 | 30,8  | 40,87 | 12,59 | 18,21 | 0,691 | 1,64  |
| 497 |     | 21,86 | 34,23 | 43,55 | 14,91 | 19,32 | 0,771 | 1,765 |
| 498 | 3,8 | 13,72 | 28,38 | 41,22 | 11,7  | 11,68 | 0,701 | 1,539 |
| 499 | 4,6 | 21,14 | 31,62 | 41,42 | 13,1  | 18,52 | 0,707 | 1,668 |
| 500 | 4,3 | 12    | 32,02 | 43,59 | 13,96 | 18,06 | 0,772 | 1,728 |
| 501 | 3,7 | 11,86 | 33,33 | 43,53 | 14,51 | 18,82 | 0,77  | 1,692 |
| 502 | 4,5 | 11,28 | 30,48 | 43,33 | 13,21 | 17,27 | 0,764 | 1,558 |
| 503 | 4,5 | 12,43 | 32,22 | 43,32 | 13,96 | 18,26 | 0,764 | 1,76  |
| 504 | 4,1 | 20,43 | 32,57 | 43,75 | 14,25 | 18,32 | 0,777 | 1,772 |
| 505 | 5,5 | 20,28 | 29,45 | 42,3  | 12,46 | 16,99 | 0,733 | 1,586 |
| 506 | 3,3 | 12    | 31,93 | 44,22 | 14,12 | 17,81 | 0,792 | 1,646 |
| 507 | 3,1 | 20,57 | 31,68 | 43,87 | 13,9  | 17,78 | 0,781 | 1,674 |
| 508 | 4   | 20,14 | 32,71 | 42,03 | 13,75 | 18,96 | 0,725 | 1,7   |
| 509 | 3,6 | 12,14 | 31,68 | 41,28 | 13,08 | 18,6  | 0,703 | 1,7   |
| 510 |     | 12,28 |       |       |       |       |       |       |
| 511 | 4,1 | 13,14 | 41,4  | 46,49 | 19,25 | 22,15 | 0,869 | 1,876 |
| 512 | 4,7 | 19,14 | 42,46 | 46,6  | 19,79 | 22,67 | 0,872 | 1,927 |
| 513 | 3,6 | 11,43 | 33,76 | 42,92 | 14,49 | 19,27 | 0,751 | 1,819 |
| 514 | 3,8 | 20,28 | 34,4  | 44,27 | 15,23 | 19,17 | 0,794 | 1,794 |
| 515 | 5   | 12,86 | 36,33 | 43,79 | 15,91 | 20,42 | 0,779 | 1,871 |
| 516 | 4,9 | 19,86 | 38,49 | 45,85 | 17,65 | 20,84 | 0,846 | 1,902 |
| 517 |     | 13,14 |       |       |       |       |       |       |
| 518 | 4,3 | 12    | 34,55 | 42,92 | 14,83 | 19,72 | 0,752 | 1,802 |
| 519 | 3,8 | 19,43 | 32,79 | 42,93 | 14,08 | 18,71 | 0,752 | 1,845 |
| 520 | 4,1 | 12,43 | 33,63 | 43,5  | 14,63 | 19    | 0,77  | 1,833 |
| 521 | 3,8 | 12,43 | 31,74 | 43,25 | 13,73 | 18,01 | 0,762 | 1,586 |
| 522 | 4,9 | 19,14 | 31,35 | 43,03 | 13,49 | 17,86 | 0,755 | 1,627 |
| 523 | 4,4 | 11,57 | 31,5  | 42,47 | 13,38 | 18,12 | 0,738 | 1,632 |
| 524 | 4,5 | 19,57 | 32,68 | 43,17 | 14,11 | 18,57 | 0,759 | 1,659 |
| 525 | 4   | 11,72 | 28,4  | 40,77 | 11,58 | 16,82 | 0,688 | 1,563 |
| 526 | 4,8 | 20,72 | 34,56 | 42,59 | 14,72 | 19,84 | 0,741 | 1,834 |
| 527 |     | 13,72 |       |       |       |       |       |       |

|     |     |       |       |       |       |       |       |       |
|-----|-----|-------|-------|-------|-------|-------|-------|-------|
| 528 | 4,4 | 20,72 | 30,12 | 41,69 | 12,56 | 17,56 | 0,715 | 1,699 |
| 529 | 5   | 12,14 | 32,78 | 41,48 | 13,6  | 19,18 | 0,709 | 1,767 |
| 530 | 4,5 | 12,28 | 29,97 | 41,4  | 12,41 | 17,56 | 0,706 | 1,661 |
| 531 | 3,5 | 20,14 | 30,84 | 43,32 | 13,36 | 17,48 | 0,764 | 1,544 |
| 532 | 5,2 | 20,28 | 30,75 | 41,82 | 12,86 | 17,89 | 0,718 | 1,675 |
| 533 | 3,2 | 11,43 | 29,54 | 41,53 | 12,27 | 17,27 | 0,71  | 1,537 |
| 534 | 4,9 | 12    | 32,48 | 39,85 | 12,94 | 19,54 | 0,662 | 1,741 |
| 535 | 3,9 | 12    | 36,88 | 44,73 | 16,5  | 20,38 | 0,809 | 1,979 |
| 536 | 4,4 | 20,14 | 36,99 | 44,09 | 16,31 | 20,68 | 0,788 | 1,997 |
| 537 |     | 11,86 |       |       |       |       |       |       |
| 538 | 3,9 | 12    | 31,54 | 41,34 | 13,04 | 18,5  | 0,704 | 1,673 |
| 539 |     | 12,14 |       |       |       |       |       |       |
| 540 | 4,8 | 21,43 |       |       |       |       |       |       |
| 541 |     | 12,57 |       |       |       |       |       |       |
| 542 |     | 12,43 |       |       |       |       |       |       |
| 543 | 4,7 | 20,28 | 31,43 | 43,07 | 13,54 | 17,89 | 0,756 | 1,649 |
| 544 | 4,1 | 12,43 | 30,57 | 42,55 | 13,01 | 17,56 | 0,74  | 1,587 |
| 545 | 4,1 | 13,28 | 28,38 | 42,14 | 11,96 | 16,42 | 0,728 | 1,552 |
| 546 | 4   | 20,28 | 28,82 | 42,15 | 12,15 | 16,67 | 0,728 | 1,607 |
| 547 |     | 13,14 |       |       |       |       |       |       |
| 548 |     | 11,43 |       |       |       |       |       |       |
| 549 |     | 12,57 |       |       |       |       |       |       |
| 550 | 4,1 | 20    | 35,56 | 43,41 | 15,44 | 20,12 | 0,767 | 1,778 |
| 551 |     | 13,57 |       |       |       |       |       |       |
| 552 | 4,2 | 12    | 34,59 | 43,07 | 14,9  | 19,69 | 0,756 | 1,731 |
| 553 | 3,4 | 12,43 | 37,93 | 44,1  | 16,73 | 21,2  | 0,789 | 2,026 |
| 554 | 4,1 | 21,43 | 40,08 | 45,5  | 18,24 | 21,84 | 0,835 | 2,05  |
| 555 | 4,4 | 12,43 | 31,53 | 41,19 | 12,99 | 18,54 | 0,7   | 1,723 |
| 556 | 5   | 20,43 | 33,93 | 43,32 | 14,7  | 19,23 | 0,764 | 1,789 |
| 557 |     | 12,28 |       |       |       |       |       |       |
| 558 | 3,2 | 11    | 33,56 | 42,22 | 14,17 | 19,39 | 0,73  | 1,721 |
| 559 | 4   | 11,57 | 32,23 | 42,41 | 13,67 | 18,56 | 0,736 | 1,673 |
| 560 | 4,5 | 20,43 | 32,34 | 42,14 | 13,63 | 18,71 | 0,728 | 1,728 |

|     |     |       |       |       |       |       |       |       |
|-----|-----|-------|-------|-------|-------|-------|-------|-------|
| 561 | 4,5 | 12,43 | 30,3  | 40,23 | 12,19 | 18,11 | 0,673 | 1,738 |
| 562 | 5,6 | 20,14 | 31,59 | 42,1  | 13,3  | 18,29 | 0,727 | 1,763 |
| 563 | 5   | 20,86 | 39,46 | 44,24 | 17,46 | 22    | 0,793 | 2,094 |
| 564 | 4,5 | 12,28 |       |       |       |       |       |       |
| 565 | 4,6 | 19,86 | 29,86 | 40,99 | 12,24 | 17,62 | 0,694 | 1,616 |
| 566 | 5   | 18,43 | 37,67 | 45,07 | 16,98 | 20,69 | 0,82  | 1,854 |
| 567 | 3,9 | 11,86 | 29,9  | 41,27 | 12,34 | 17,56 | 0,702 | 1,587 |
| 568 | 4,1 | 13,28 | 37,95 | 45,21 | 17,16 | 20,79 | 0,825 | 1,854 |
| 569 |     | 12,43 |       |       |       |       |       |       |
| 570 | 5,8 | 20,43 | 36,01 | 43,79 | 15,77 | 20,24 | 0,779 | 1,903 |
| 571 |     | 11,43 |       |       |       |       |       |       |
| 572 | 5,2 | 13    | 33,54 | 42,03 | 14,1  | 19,44 | 0,726 | 1,842 |
| 573 |     | 11    |       |       |       |       |       |       |
| 574 | 3,3 | 12,28 | 26,97 | 39,85 | 10,75 | 16,22 | 0,662 | 1,5   |
| 575 | 4,1 | 18,86 | 34,32 | 46,88 | 16,09 | 18,23 | 0,882 | 1,779 |
| 576 | 4,5 | 20,43 | 28,38 | 40,52 | 11,5  | 16,88 | 0,681 | 1,573 |
| 577 | 4,4 | 11,72 | 24,43 | 39,58 | 9,67  | 14,76 | 0,655 | 1,418 |
| 578 | 4,1 | 12,72 | 32,34 | 44,68 | 14,45 | 17,89 | 0,807 | 1,724 |
| 579 | 4,4 | 20,57 | 32,37 | 44,2  | 14,31 | 18,06 | 0,792 | 1,681 |
| 580 | 4,1 | 12,57 | 33,04 | 43,97 | 14,53 | 18,51 | 0,784 | 1,641 |
| 581 | 5,6 | 19,72 | 26,5  | 41,05 | 10,88 | 15,62 | 0,696 | 1,467 |
| 582 | 3,7 | 20,72 | 29,93 | 42,9  | 12,84 | 17,09 | 0,751 | 1,651 |
| 583 | 3,6 | 12,72 | 27,98 | 41,1  | 11,5  | 16,48 | 0,697 | 1,582 |
| 584 | 4,2 | 33,14 | 39,37 | 46,81 | 18,43 | 20,94 | 0,88  | 1,985 |
| 585 | 4,6 | 20    | 35,59 | 44,11 | 15,7  | 19,89 | 0,789 | 1,888 |
| 586 | 4,3 | 11,14 | 35,25 | 43,88 | 15,47 | 19,78 | 0,782 | 1,884 |
| 587 | 4,3 | 12,14 | 30,48 | 40,87 | 12,46 | 18,02 | 0,691 | 1,621 |
| 588 | 4,1 | 19,72 | 32,53 | 42,82 | 13,93 | 18,6  | 0,748 | 1,083 |
| 589 | 4,3 | 19,86 | 27,03 | 41,39 | 11,19 | 15,84 | 0,706 | 1,493 |
| 590 | 3,9 | 12,57 | 31,47 | 42,1  | 13,25 | 18,22 | 0,727 | 1,709 |
| 591 | 4,3 | 20    | 33,26 | 43,35 | 14,42 | 18,84 | 0,765 | 1,762 |
| 592 | 3,7 | 12,43 | 32,64 | 41,94 | 13,69 | 18,95 | 0,722 | 1,768 |
| 593 | 4,4 | 20,14 | 34,06 | 42,3  | 14,41 | 19,65 | 0,733 | 1,874 |

|     |     |       |       |       |       |       |       |       |
|-----|-----|-------|-------|-------|-------|-------|-------|-------|
| 594 | 4,2 | 19,86 | 36,21 | 45,09 | 16,33 | 19,88 | 0,821 | 1,829 |
| 595 | 4,1 | 12,28 | 35,28 | 44,58 | 15,73 | 19,55 | 0,804 | 1,791 |
| 596 | 3,5 | 11,43 | 38,15 | 43,04 | 16,42 | 21,73 | 0,755 | 1,992 |
| 597 | 4,3 | 11,86 | 26,87 | 41,86 | 11,25 | 15,62 | 0,72  | 1,466 |
| 598 | 4   | 20    | 34,33 | 42,9  | 14,73 | 19,6  | 0,751 | 1,817 |
| 599 | 4,9 | 19,86 | 34,85 | 42,58 | 14,84 | 20,01 | 0,741 | 1,826 |
| 600 | 4,5 | 12,14 | 34,71 | 42,09 | 14,61 | 20,1  | 0,726 | 1,836 |
| 601 | 5,1 | 12,57 | 42,25 | 45,11 | 19,06 | 23,19 | 0,821 | 2,323 |
| 602 | 4,3 | 12,28 | 33,02 | 42,91 | 14,17 | 18,85 | 0,751 | 1,738 |
| 603 | 5,3 | 20,57 | 42,38 | 44,99 | 19,07 | 23,31 | 0,818 | 2,343 |
| 604 | 4,3 | 19,57 | 32,38 | 42,4  | 13,73 | 18,65 | 0,736 | 1,704 |
| 605 | 3,4 | 20,86 | 32,86 | 42,6  | 14    | 18,86 | 0,742 | 1,734 |
| 606 | 4,1 | 20    | 34,98 | 44,62 | 15,61 | 19,37 | 0,805 | 1,717 |
| 607 | 4,4 | 12,43 | 31,07 | 41,22 | 12,81 | 18,26 | 0,701 | 1,663 |
| 608 | 3,3 | 13,14 | 31,01 | 41,34 | 12,82 | 18,19 | 0,704 | 1,659 |
| 609 |     | 12,14 |       |       |       |       |       |       |
| 610 | 3,5 | 11    |       |       |       |       |       |       |
| 611 | 4,3 | 11,57 | 34,05 | 41,52 | 14,14 | 19,91 | 0,71  | 1,888 |
| 612 | 5,1 | 20,57 | 36,16 | 42,8  | 15,48 | 20,68 | 0,748 | 1,943 |
| 613 | 4,4 | 20    | 37,96 | 44,81 | 17,01 | 20,95 | 0,811 | 1,856 |
| 614 | 3,8 | 12    | 35,79 | 43,22 | 15,47 | 20,32 | 0,761 | 1,818 |
| 615 | 3,8 | 20,14 | 39,65 | 43,88 | 17,4  | 22,25 | 0,782 | 2,038 |
| 616 | 3,7 | 11    | 41,58 | 46,15 | 19,19 | 22,39 | 0,857 | 2,114 |
| 617 | 3,4 | 12    | 34,02 | 43,7  | 14,87 | 19,15 | 0,776 | 1,762 |
| 618 | 3,8 | 20    | 36,65 | 44,74 | 16,4  | 20,25 | 0,809 | 1,815 |
| 619 | 3,2 | 12,14 | 41,98 | 42,87 | 18    | 23,98 | 0,75  | 2,016 |
| 620 | 4   | 12,43 | 30,41 | 41,13 | 12,51 | 17,9  | 0,698 | 1,616 |
| 621 | 4,4 | 20    | 35,16 | 43,2  | 15,19 | 19,97 | 0,76  | 1,988 |
| 622 | 4,7 | 20    | 38,7  | 45,24 | 17,51 | 21,19 | 0,826 | 1,918 |
| 623 | 4,7 | 13    | 36,47 | 43,81 | 15,98 | 20,49 | 0,779 | 1,966 |
| 624 | 6   | 20,43 | 34,81 | 44,32 | 15,43 | 19,38 | 0,796 | 1,998 |
| 625 | 5   | 12,57 | 33,21 | 42,9  | 14,25 | 18,96 | 0,751 | 1,976 |
| 626 |     | 12,57 |       |       |       |       |       |       |

|     |     |       |       |       |       |       |       |       |
|-----|-----|-------|-------|-------|-------|-------|-------|-------|
| 627 | 4,6 | 11,14 | 36,69 | 44,04 | 16,16 | 20,53 | 0,787 | 1,876 |
| 628 | 3,5 | 35,14 | 43,65 | 44,94 | 19,62 | 24,03 | 0,816 | 2,378 |
| 629 | 4,7 | 20,28 | 34,18 | 43,68 | 14,43 | 19,25 | 0,775 | 1,831 |
| 630 |     | 11,72 |       |       |       |       |       |       |
| 631 | 4,3 | 10,43 | 32,97 | 42,91 | 14,15 | 18,82 | 0,751 | 1,743 |
| 632 | 3,3 | 11,57 | 41,2  | 42,28 | 17,42 | 23,78 | 0,732 | 2,263 |
| 633 | 3,6 | 20,57 | 41,13 | 44,07 | 18,13 | 23    | 0,788 | 2,274 |
| 634 | 4   | 21,14 | 40,11 | 45,45 | 18,23 | 21,88 | 0,833 | 2,038 |
| 635 | 4,3 | 12,57 | 27,99 | 40,83 | 11,43 | 16,56 | 0,69  | 1,658 |
| 636 | 4,1 | 11,57 | 37,05 | 43,15 | 15,98 | 21,05 | 0,759 | 1,943 |
| 637 | 5,8 | 20,28 | 37    | 43,05 | 15,93 | 21,07 | 0,756 | 2,088 |
| 638 | 4,3 | 11,28 | 35,79 | 42,19 | 15,1  | 20,69 | 0,729 | 2,077 |
| 639 |     | 19    | 45,04 | 46,31 | 20,86 | 24,18 | 0,862 | 2,223 |
| 640 | 5   | 20,57 | 30,42 | 42,57 | 12,95 | 17,47 | 0,741 | 1,789 |
| 641 | 4,5 | 11,14 | 45,47 | 42,99 | 19,55 | 25,92 | 0,754 | 2,245 |
| 642 | 4,5 | 12,14 | 30,35 | 43,09 | 13,08 | 17,27 | 0,757 | 1,74  |
| 643 |     | 11,57 |       |       |       |       |       |       |
| 644 | 5,1 | 19,72 | 35,01 | 44,64 | 15,63 | 19,38 | 0,806 | 1,819 |
| 645 | 4,8 | 12    | 34,31 | 42,87 | 14,71 | 19,6  | 0,75  | 1,819 |
| 646 | 4,8 | 12,72 | 32,91 | 41,93 | 13,8  | 19,11 | 0,722 | 1,811 |
| 647 | 4,9 | 20,86 | 33,95 | 42    | 14,26 | 19,69 | 0,724 | 1,861 |
| 648 | 4,1 | 20,28 | 36,2  | 44,25 | 16,02 | 20,18 | 0,793 | 1,82  |
| 649 | 3,6 | 12,28 | 36,17 | 43,79 | 15,84 | 20,33 | 0,779 | 1,781 |
| 650 |     | 12,28 |       |       |       |       |       |       |
| 651 | 4,8 | 12,57 | 33,32 | 43,57 | 14,52 | 18,8  | 0,772 | 1,776 |
| 652 | 4,8 | 12,86 | 33,41 | 42,11 | 14,07 | 19,34 | 0,727 | 1,863 |
| 653 | 4,2 | 19,72 | 34,09 | 42,41 | 14,46 | 19,63 | 0,736 | 1,901 |
| 654 | 4,4 | 19,86 | 29,63 | 41,64 | 12,34 | 17,29 | 0,713 | 1,592 |
| 655 | 3,2 | 12,28 | 29,37 | 42,21 | 12,4  | 16,97 | 0,73  | 1,537 |
| 656 |     | 11,28 |       |       |       |       |       |       |
| 657 | 3,6 | 12    |       |       |       |       |       |       |
| 658 | 3,8 | 13,72 | 30,62 | 43,69 | 13,38 | 17,24 | 0,776 | 1,534 |
| 659 | 3,8 | 19,72 | 31,25 | 43,2  | 13,5  | 17,75 | 0,76  | 1,578 |

|     |     |       |       |       |       |       |       |       |
|-----|-----|-------|-------|-------|-------|-------|-------|-------|
| 660 |     | 12,57 |       |       |       |       |       |       |
| 661 | 4,6 | 20,72 | 37,69 | 45,79 | 17,26 | 20,43 | 0,844 | 1,879 |
| 662 | 4   | 12,72 | 36,93 | 44,97 | 16,61 | 20,32 | 0,817 | 1,816 |
| 663 | 4,4 | 19,86 | 37,45 | 45,2  | 16,93 | 20,52 | 0,825 | 1,906 |
| 664 | 3,9 | 13,14 | 35,04 | 43,4  | 15,21 | 19,83 | 0,767 | 1,843 |
| 665 |     | 12,28 |       |       |       |       |       |       |
| 666 | 5,3 | 20    | 35,92 | 43,17 | 15,51 | 20,41 | 0,759 | 1,913 |
| 667 | 5,2 | 12,28 | 37,36 | 43,54 | 16,27 | 21,09 | 0,771 | 1,856 |
| 668 | 5,3 | 20,14 | 35,3  | 42,63 | 15,05 | 20,25 | 0,743 | 1,855 |
| 669 | 4,4 | 12,57 | 33,49 | 41,23 | 13,81 | 19,68 | 0,701 | 1,784 |
| 670 |     | 11,43 |       |       |       |       |       |       |
| 671 | 3,9 | 12,28 | 30,56 | 41,78 | 12,77 | 17,79 | 0,717 | 1,678 |
| 672 | 4,4 | 20,43 | 30,8  | 41,33 | 12,73 | 18,07 | 0,704 | 1,753 |
| 673 |     | 11,43 |       |       |       |       |       |       |
| 674 | 3,7 | 20,72 |       |       |       |       |       |       |
| 675 | 3,2 | 12,72 | 34,66 | 44,43 | 15,4  | 19,26 | 0,799 | 1,683 |
| 676 | 3,7 | 12,28 | 31,94 | 41,85 | 13,37 | 18,57 | 0,719 | 1,693 |
| 677 | 3,8 | 12,28 | 35,09 | 45,19 | 15,86 | 19,23 | 0,824 | 1,714 |
| 678 | 4   | 11,72 | 34,5  | 43,39 | 14,97 | 19,53 | 0,766 | 1,914 |
| 679 | 4,2 | 20,57 | 34,37 | 43,29 | 14,88 | 19,49 | 0,763 | 1,95  |
| 680 |     | 12,14 |       |       |       |       |       |       |
| 681 | 4,2 | 11,57 | 33,22 | 41,81 | 13,89 | 19,33 | 0,718 | 1,932 |
| 682 |     | 12,43 |       |       |       |       |       |       |
| 683 | 4,9 | 11,57 | 33,79 | 43,62 | 14,74 | 19,05 | 0,773 | 1,71  |
| 684 | 4,8 | 19,57 | 34,14 | 44,02 | 15,03 | 19,11 | 0,786 | 1,749 |
| 685 | 3,8 | 20,86 | 36,99 | 46,01 | 17,02 | 19,97 | 0,852 | 2,001 |
| 686 | 3,3 | 12,57 | 34,61 | 44,32 | 15,34 | 19,27 | 0,796 | 1,961 |
| 687 | 3,7 | 22,72 | 36,73 | 44,4  | 16,31 | 20,42 | 0,798 | 1,762 |
| 688 | 3,4 | 13    |       |       |       |       |       |       |
| 689 |     | 11,86 |       |       |       |       |       |       |
| 690 | 3,4 | 11,86 | 30,48 | 42,19 | 12,86 | 17,62 | 0,729 | 1,605 |
| 691 | 4,4 | 19,72 | 31,17 | 42,6  | 13,28 | 17,89 | 0,742 | 1,605 |
| 692 | 4,2 | 33    |       |       |       |       |       |       |

|     |     |       |       |       |       |       |       |       |
|-----|-----|-------|-------|-------|-------|-------|-------|-------|
| 693 | 4,3 | 20,14 |       |       |       |       |       |       |
| 694 | 4,3 | 13,57 |       |       |       |       |       |       |
| 695 |     | 12,14 |       |       |       |       |       |       |
| 696 |     | 12,86 |       |       |       |       |       |       |
| 697 | 3,4 | 12,72 | 36,05 | 44,85 | 16,17 | 19,88 | 0,813 | 1,877 |
| 698 | 4,3 | 20,28 | 34,09 | 43,53 | 14,84 | 19,25 | 0,77  | 1,674 |
| 699 | 3,4 | 11,72 | 33,37 | 43,99 | 14,68 | 18,69 | 0,785 | 1,616 |
| 700 | 4   | 20,43 | 35,06 | 45,2  | 15,85 | 19,21 | 0,825 | 1,69  |
| 701 | 3,4 | 11,72 | 34,24 | 44,88 | 15,37 | 18,87 | 0,814 | 1,635 |
| 702 |     | 11,43 |       |       |       |       |       |       |
| 703 |     | 11,72 |       |       |       |       |       |       |
| 704 |     | 12,28 |       |       |       |       |       |       |
| 705 |     | 11,72 |       |       |       |       |       |       |
| 706 |     | 12,43 |       |       |       |       |       |       |
| 707 |     | 11,43 |       |       |       |       |       |       |
| 708 |     | 12,72 |       |       |       |       |       |       |
| 709 |     | 12,86 |       |       |       |       |       |       |
| 710 |     | 13,57 |       |       |       |       |       |       |
| 711 |     | 12,57 |       |       |       |       |       |       |
| 712 |     | 13    |       |       |       |       |       |       |
| 713 |     | 13,72 |       |       |       |       |       |       |
| 714 |     | 11,43 |       |       |       |       |       |       |
| 715 |     | 14,14 |       |       |       |       |       |       |
| 716 |     | 12,14 |       |       |       |       |       |       |
| 717 | 4,2 | 13,86 | 30,19 | 41,5  | 12,53 | 17,66 | 0,709 | 1,781 |
| 718 | 4,6 | 20    | 30,36 | 41,17 | 12,5  | 17,86 | 0,699 | 1,813 |
| 719 |     | 11,43 |       |       |       |       |       |       |
| 720 |     | 12    |       |       |       |       |       |       |
| 721 |     | 10,57 |       |       |       |       |       |       |
| 722 |     | 12,57 |       |       |       |       |       |       |
| 723 |     | 13,14 |       |       |       |       |       |       |
| 724 |     | 12    |       |       |       |       |       |       |
| 725 |     | 12,28 |       |       |       |       |       |       |

|     |     |       |       |       |       |       |       |       |
|-----|-----|-------|-------|-------|-------|-------|-------|-------|
| 726 |     | 11,72 |       |       |       |       |       |       |
| 727 |     | 12,43 |       |       |       |       |       |       |
| 728 |     | 12    |       |       |       |       |       |       |
| 729 |     | 11,86 |       |       |       |       |       |       |
| 730 |     | 11,14 |       |       |       |       |       |       |
| 731 |     | 12,72 |       |       |       |       |       |       |
| 732 |     | 11,86 |       |       |       |       |       |       |
| 733 | 4,9 | 19,43 | 33,13 | 42,74 | 14,16 | 18,97 | 0,746 | 1,709 |
| 734 | 4,2 | 11,43 | 32,12 | 42,09 | 13,52 | 18,6  | 0,726 | 1,654 |
| 735 | 4,3 | 19,14 | 33,84 | 44,17 | 14,95 | 18,89 | 0,791 | 1,808 |
| 736 | 4,8 | 12,14 | 35,97 | 44,89 | 16,15 | 19,82 | 0,814 | 1,789 |
| 737 |     | 12,43 |       |       |       |       |       |       |
| 738 | 3,9 | 12,43 | 32,67 | 43,83 | 14,32 | 18,35 | 0,78  | 1,611 |
| 739 | 4,2 | 20,43 | 35,1  | 45,32 | 15,91 | 19,19 | 0,829 | 1,691 |
| 740 | 3,8 | 12,43 | 32,49 | 43,7  | 14,2  | 18,29 | 0,776 | 1,638 |
| 741 |     | 12,14 |       |       |       |       |       |       |
| 742 | 4,8 | 20,14 | 36,01 | 43,12 | 15,53 | 20,48 | 0,758 | 1,92  |
| 743 | 4,6 | 12    | 35,04 | 42,43 | 14,87 | 20,17 | 0,737 | 1,883 |
| 744 |     | 13,28 |       |       |       |       |       |       |
| 745 |     | 11,43 |       |       |       |       |       |       |
| 746 |     | 11,86 |       |       |       |       |       |       |
| 747 | 4,7 | 19,86 | 35,03 | 43,27 | 15,16 | 19,87 | 0,762 | 1,92  |
| 748 | 4,9 | 11,43 | 34,24 | 43,22 | 14,8  | 19,44 | 0,761 | 1,867 |
| 749 | 5,2 | 18,14 | 30,81 | 43,13 | 13,29 | 17,52 | 0,758 | 1,636 |
| 750 | 5,1 | 12,14 | 29,03 | 41,3  | 11,99 | 17,04 | 0,703 | 1,609 |
| 751 |     | 12,14 |       |       |       |       |       |       |
| 752 |     | 11,57 |       |       |       |       |       |       |
| 753 |     | 11,43 |       |       |       |       |       |       |
| 754 |     | 13,43 |       |       |       |       |       |       |
| 755 |     | 12,57 |       |       |       |       |       |       |
| 756 | 4,1 | 21,14 | 31,92 | 42,88 | 13,69 | 18,23 | 0,75  | 1,765 |
| 757 | 3,7 | 12,43 | 31,15 | 42,18 | 13,14 | 18,01 | 0,729 | 1,699 |
| 758 | 4,1 | 12,57 |       |       |       |       |       |       |



|     |     |       |       |       |       |       |       |       |
|-----|-----|-------|-------|-------|-------|-------|-------|-------|
| 759 | 3,7 | 19,57 | 33,03 | 41,81 | 13,81 | 19,22 | 0,718 | 1,807 |
| 760 | 4,3 | 12,86 | 39,56 | 44,18 | 17,48 | 22,08 | 0,791 | 1,93  |
| 761 | 4,4 | 19,72 | 42,19 | 45,81 | 19,33 | 22,86 | 0,845 | 1,974 |
| 762 | 4,6 | 20,43 | 32,78 | 42,49 | 13,93 | 18,85 | 0,738 | 1,842 |
| 763 | 4,1 | 11,72 | 31,26 | 41,07 | 12,84 | 18,42 | 0,697 | 1,824 |
| 764 | 4,1 | 11,57 | 33,42 | 41,95 | 14,02 | 19,4  | 0,722 | 1,754 |
| 765 | 4,6 | 19,72 | 35,81 | 43,5  | 15,58 | 20,23 | 0,77  | 1,807 |
| 766 | 4,5 | 20,14 | 35,35 | 43,39 | 15,34 | 20,01 | 0,766 | 1,914 |
| 767 | 3,4 | 11,28 | 35,05 | 42,71 | 14,97 | 20,08 | 0,745 | 1,926 |
| 768 | 4,6 | 21,28 | 42,59 | 46,34 | 19,74 | 22,85 | 0,863 | 2,339 |
| 769 | 4,1 | 13    |       |       |       |       |       |       |
| 770 | 4,1 | 19,86 | 31,62 | 40,82 | 12,91 | 18,71 | 0,69  | 1,726 |
| 771 | 4,1 | 12,86 | 29,36 | 38,89 | 11,42 | 17,94 | 0,636 | 1,678 |
| 772 | 5,1 | 12,86 | 31,48 | 45,01 | 14,17 | 17,31 | 0,818 | 1,548 |
| 773 | 5,7 | 19,28 | 31,47 | 45,12 | 14,2  | 17,27 | 0,822 | 1,59  |
| 774 | 4,4 | 19,86 | 29,82 | 42,99 | 12,82 | 17    | 0,754 | 1,572 |
| 775 | 3,9 | 12,43 | 29,23 | 42,35 | 12,38 | 16,85 | 0,734 | 1,537 |
| 776 |     | 11,57 |       |       |       |       |       |       |
| 777 |     | 12,28 |       |       |       |       |       |       |
| 778 |     | 13,14 |       |       |       |       |       |       |
| 779 | 7,3 | 20,57 | 38,67 | 44,32 | 17,14 | 21,53 | 0,796 | 2,188 |
| 780 | 5,6 | 13    | 38,2  | 44,34 | 16,94 | 21,26 | 0,796 | 2,166 |
| 781 | 4   | 12,86 | 35,57 | 43,4  | 15,44 | 20,13 | 0,767 | 1,852 |
| 782 | 4,3 | 20    | 36,19 | 43,74 | 15,83 | 20,36 | 0,777 | 1,896 |
| 783 | 4,3 | 11,43 | 31,98 | 41,83 | 13,38 | 18,6  | 0,719 | 1,654 |
| 784 | 4,5 | 12,86 | 32,17 | 43,73 | 14,07 | 18,1  | 0,777 | 1,653 |
| 785 | 4,6 | 21,43 | 32,1  | 41,83 | 13,43 | 18,67 | 0,719 | 1,7   |
| 786 | 4,5 | 19,28 | 31,61 | 44,09 | 13,94 | 17,67 | 0,788 | 1,729 |
| 787 | 4,2 | 13,28 | 31,18 | 44,29 | 13,81 | 17,37 | 0,795 | 1,695 |
| 788 |     | 11,28 |       |       |       |       |       |       |
| 789 | 4,8 | 21    | 33,65 | 42,88 | 14,43 | 19,22 | 0,75  | 1,768 |
| 790 | 3,9 | 13    | 32,22 | 41,68 | 13,43 | 18,79 | 0,714 | 1,707 |
| 791 | 4,3 | 19,72 | 34,53 | 42,57 | 14,7  | 19,83 | 0,741 | 1,791 |

|     |     |       |       |       |       |       |       |       |
|-----|-----|-------|-------|-------|-------|-------|-------|-------|
| 792 | 4   | 12    | 33,95 | 42,2  | 14,33 | 19,62 | 0,73  | 1,751 |
| 793 |     | 13,28 |       |       |       |       |       |       |
| 794 | 3,7 | 20    | 34,12 | 43,78 | 14,94 | 19,18 | 0,778 | 1,692 |
| 795 | 3,5 | 11,86 | 31,78 | 41,53 | 13,2  | 18,58 | 0,71  | 1,635 |
| 796 | 4,2 | 21    | 31,29 | 43,84 | 13,72 | 17,57 | 0,78  | 1,581 |
| 797 | 3,4 | 13,57 | 29,7  | 42,72 | 12,69 | 17,07 | 0,746 | 1,539 |
| 798 | 4,2 | 21,14 | 40,98 | 44,48 | 18,23 | 22,75 | 0,801 | 1,991 |
| 799 | 3,8 | 11,72 | 37,68 | 43,15 | 16,26 | 21,42 | 0,759 | 1,949 |
| 800 | 4,9 | 19,86 | 36,42 | 44,39 | 16,17 | 20,25 | 0,798 | 1,894 |
| 801 | 4,2 | 13,86 |       |       |       |       |       |       |
| 802 | 3,8 | 20,86 | 31,2  | 41,47 | 12,94 | 18,26 | 0,708 | 1,682 |
| 803 | 3,7 | 13,14 | 31,02 | 41,97 | 13,02 | 18    | 0,723 | 1,654 |
| 804 | 4,8 | 20,57 | 31,74 | 43,41 | 13,78 | 17,96 | 0,767 | 1,712 |
| 805 | 4,3 | 11    | 30,57 | 42,13 | 12,88 | 17,69 | 0,728 | 1,646 |
| 806 | 4,5 | 19,86 | 37,64 | 45,51 | 17,13 | 20,51 | 0,835 | 2,045 |
| 807 | 4,7 | 11,86 | 37,08 | 44,84 | 16,63 | 20,45 | 0,813 | 2,023 |
| 808 |     | 12,43 |       |       |       |       |       |       |
| 809 | 4,4 | 20,14 | 31,03 | 43,11 | 13,38 | 17,65 | 0,758 | 1,619 |
| 810 | 4,1 | 12,57 | 29,47 | 41,83 | 12,33 | 17,14 | 0,719 | 1,549 |
| 811 | 4,7 | 22    | 33,51 | 44,01 | 14,75 | 18,76 | 0,786 | 1,714 |
| 812 | 4,1 | 12    | 33,41 | 43,99 | 14,7  | 18,71 | 0,785 | 1,659 |
| 813 |     | 10,72 |       |       |       |       |       |       |
| 814 | 4,3 | 12,14 | 38,08 | 44,11 | 16,8  | 21,28 | 0,789 | 1,906 |
| 815 | 5,1 | 19,86 | 38,15 | 44,63 | 17,03 | 21,12 | 0,806 | 1,902 |
| 816 | 3,8 | 11,72 | 28,53 | 40,44 | 11,54 | 16,99 | 0,679 | 1,543 |
| 817 | 4,6 | 19,86 | 35,29 | 44,99 | 15,88 | 19,41 | 0,818 | 1,736 |
| 818 | 3,9 | 11    | 32,36 | 43,32 | 14,02 | 18,34 | 0,764 | 1,683 |
| 819 | 4,3 | 28    | 31,17 | 43,08 | 13,43 | 17,74 | 0,757 | 1,591 |
| 820 | 3,9 | 18,43 | 34,51 | 45,08 | 15,56 | 18,95 | 0,821 | 1,715 |
| 821 | 3,5 | 12    | 31,57 | 42,57 | 13,44 | 18,13 | 0,741 | 1,667 |
| 822 |     | 13    |       |       |       |       |       |       |
| 823 |     | 13,14 |       |       |       |       |       |       |
| 824 | 4,6 | 19,43 | 36,04 | 43,84 | 15,8  | 20,24 | 0,78  | 1,688 |

|     |     |       |       |       |       |       |       |       |
|-----|-----|-------|-------|-------|-------|-------|-------|-------|
| 825 | 4,4 | 34,72 | 35,75 | 45,79 | 16,37 | 19,38 | 0,844 | 1,943 |
| 826 | 4,5 | 20,57 | 32,2  | 43,38 | 13,97 | 18,23 | 0,766 | 1,788 |
| 827 | 3,9 | 11,72 | 32,49 | 43,05 | 13,99 | 18,5  | 0,756 | 1,788 |
| 828 |     | 11,28 |       |       |       |       |       |       |
| 829 | 3,3 | 12,14 | 31,43 | 42,25 | 13,28 | 18,15 | 0,731 | 1,601 |
| 830 |     | 11,14 |       |       |       |       |       |       |
| 831 | 3,5 | 12,57 | 34,69 | 44,04 | 15,28 | 19,41 | 0,787 | 1,765 |
| 832 | 3,9 | 17,86 | 33,26 | 43,47 | 14,46 | 18,8  | 0,769 | 1,784 |
| 833 | 4,4 | 19,43 | 29,87 | 42,95 | 12,83 | 17,04 | 0,752 | 1,571 |
| 834 | 4   | 11,43 | 28,1  | 41,7  | 11,72 | 16,38 | 0,715 | 1,508 |
| 835 |     | 11,72 |       |       |       |       |       |       |
| 836 |     | 12,57 |       |       |       |       |       |       |
| 837 | 3,9 | 20,86 | 33,22 | 43,91 | 14,59 | 18,63 | 0,783 | 1,718 |
| 838 | 3,8 | 12,57 | 31,71 | 43,23 | 13,71 | 18    | 0,761 | 1,651 |
| 839 | 4,3 | 11,43 | 33,41 | 41,93 | 14,01 | 19,4  | 0,722 | 1,793 |
| 840 | 4,5 | 20,43 | 33,5  | 42,08 | 14,1  | 19,4  | 0,726 | 1,843 |
| 841 | 3,8 | 19    | 34,35 | 43,81 | 15,05 | 19,3  | 0,779 | 1,865 |
| 842 | 3,4 | 12    | 34,69 | 44,01 | 15,27 | 19,42 | 0,786 | 1,872 |
| 843 | 4   | 12,57 | 35,22 | 41,11 | 14,48 | 20,74 | 0,698 | 1,941 |
| 844 | 4,5 | 19,86 | 35,29 | 41,25 | 14,56 | 20,73 | 0,702 | 1,962 |
| 845 | 4,6 | 21,14 | 40,87 | 45,92 | 18,77 | 22,1  | 0,849 | 2,066 |
| 846 | 4,1 | 12    | 39,82 | 46,2  | 18,4  | 21,42 | 0,859 | 2,049 |
| 847 | 4,2 | 12,43 | 37,19 | 43,18 | 16,06 | 21,13 | 0,76  | 1,881 |
| 848 | 4,5 | 21,43 | 39,24 | 43,8  | 17,19 | 22,05 | 0,779 | 1,947 |
| 849 | 3,3 | 13,43 | 31,01 | 40,34 | 12,51 | 18,5  | 0,676 | 1,711 |
| 850 | 3,8 | 20,14 | 32,32 | 41,24 | 13,33 | 18,99 | 0,701 | 1,751 |
| 851 | 4,4 | 21    | 32,65 | 44,28 | 14,46 | 18,19 | 0,794 | 1,705 |
| 852 | 4,1 | 11,57 | 29,88 | 41,96 | 12,54 | 17,34 | 0,723 | 1,667 |
| 853 |     | 12,14 |       |       |       |       |       |       |
| 854 | 3,9 | 10,57 | 36,03 | 42,85 | 15,44 | 20,59 | 0,749 | 1,873 |
| 855 | 4,6 | 20    | 37,39 | 43,67 | 16,33 | 21,06 | 0,775 | 1,925 |
| 856 |     | 7,72  |       |       |       |       |       |       |
| 857 | 4,5 | 20,57 | 29,62 | 42,33 | 12,54 | 17,08 | 0,734 | 1,553 |

|     |     |       |       |       |       |       |       |       |
|-----|-----|-------|-------|-------|-------|-------|-------|-------|
| 858 | 4,2 | 12,57 | 29,69 | 42,74 | 12,69 | 17    | 0,746 | 1,517 |
| 859 | 4   | 10,43 | 30,19 | 42,03 | 12,69 | 17,5  | 0,725 | 1,615 |
| 860 | 3,7 | 19,57 | 31,39 | 42,97 | 13,49 | 17,9  | 0,753 | 1,697 |
| 861 | 4,5 | 12,86 | 38,54 | 45,48 | 17,53 | 21,01 | 0,834 | 2,047 |
| 862 | 4,9 | 28,14 | 39,51 | 45,93 | 18,15 | 21,36 | 0,849 | 2,097 |
| 863 | 4,1 | 21,14 | 39,02 | 45,95 | 17,93 | 21,09 | 0,85  | 2,064 |
| 864 | 4   | 19,72 | 36,94 | 44,15 | 16,31 | 20,63 | 0,79  | 1,834 |
| 865 | 3,8 | 12,72 | 37,3  | 44,02 | 16,42 | 20,88 | 0,786 | 1,801 |
| 866 | 5,1 | 12    |       |       |       |       |       |       |
| 867 | 5,4 | 20,57 | 56,3  | 49,92 | 28,11 | 28,19 | 0,997 | 2,442 |
| 868 | 4,8 | 20,57 | 33,55 | 43,6  | 14,63 | 18,92 | 0,773 | 1,856 |
| 869 | 4,8 | 12,14 | 33,56 | 43,77 | 14,69 | 18,87 | 0,778 | 1,795 |
| 870 | 4,2 | 20,43 | 30,28 | 41,8  | 12,66 | 17,62 | 0,718 | 1,673 |
| 871 | 3,4 | 11,28 | 29,31 | 41,28 | 12,1  | 17,21 | 0,703 | 1,591 |
| 872 | 3,7 | 20,57 | 32,96 | 40,01 | 13,19 | 19,77 | 0,667 | 1,927 |
| 873 | 3,4 | 11,57 | 33,73 | 40,67 | 13,72 | 20,01 | 0,685 | 1,914 |
| 874 | 4,8 | 20,14 | 31,58 | 42,65 | 13,47 | 18,11 | 0,743 | 1,659 |
| 875 | 4,5 | 12,86 | 32,02 | 42,62 | 13,65 | 18,37 | 0,743 | 1,632 |
| 876 |     | 12,28 |       |       |       |       |       |       |
| 877 | 4,1 | 19,86 | 35,04 | 44,17 | 15,48 | 19,56 | 0,791 | 1,778 |
| 878 | 3,1 | 12,28 | 34,22 | 43,83 | 15    | 19,22 | 0,78  | 1,751 |
| 879 | 3,6 | 19,86 | 33,52 | 44,15 | 14,8  | 18,72 | 0,79  | 1,866 |
| 880 | 3,7 | 12,86 | 32,47 | 44,22 | 14,36 | 18,11 | 0,792 | 1,803 |
| 881 | 3,5 | 12    | 47,61 | 47,82 | 22,77 | 24,84 | 0,916 | 2,272 |
| 882 | 3,7 | 20    | 45,84 | 46,48 | 21,31 | 24,53 | 0,868 | 2,226 |
| 883 | 3,5 | 19,86 | 35,05 | 43,82 | 15,36 | 19,69 | 0,78  | 1,883 |
| 884 | 3,7 | 11,86 | 33,45 | 41,88 | 14,01 | 19,44 | 0,72  | 1,883 |
| 885 | 4,2 | 20,14 | 39,64 | 45,2  | 17,92 | 21,72 | 0,825 | 1,802 |
| 886 | 4,1 | 12,43 | 37,11 | 43,97 | 16,32 | 20,79 | 0,784 | 1,734 |
| 887 |     | 12    |       |       |       |       |       |       |
| 888 | 5   | 20,86 | 34,05 | 44,28 | 15,08 | 18,97 | 0,794 | 1,785 |
| 889 | 4,3 | 13,28 | 34,51 | 44,59 | 15,39 | 19,12 | 0,804 | 1,733 |
| 890 | 4,5 | 13,14 | 32,14 | 42,9  | 13,79 | 18,35 | 0,751 | 1,832 |

|     |     |       |       |       |       |       |       |       |
|-----|-----|-------|-------|-------|-------|-------|-------|-------|
| 891 | 5,1 | 20,86 | 48,84 | 47,78 | 23,34 | 25,5  | 0,915 | 2,33  |
| 892 | 4,3 | 12    | 52,71 | 46,32 | 24,42 | 28,29 | 0,863 | 2,299 |
| 893 |     | 13    |       |       |       |       |       |       |
| 894 | 3,8 | 20,14 | 42,84 | 45,51 | 19,5  | 23,34 | 0,835 | 2,212 |
| 895 | 3,5 | 10,72 | 43,26 | 45,05 | 19,49 | 23,77 | 0,819 | 2,234 |
| 896 |     | 11,86 |       |       |       |       |       |       |
| 897 | 4,3 | 12,28 | 32,7  | 42,17 | 13,79 | 18,91 | 0,729 | 1,751 |
| 898 | 4,3 | 19,86 | 34,94 | 44,41 | 15,52 | 19,42 | 0,799 | 1,791 |
| 899 | 4   | 20,14 | 28,42 | 41,62 | 11,83 | 16,59 | 0,713 | 1,554 |
| 900 | 2,9 | 11,57 | 28,38 | 41,75 | 11,85 | 16,53 | 0,716 | 1,495 |
| 901 |     | 13,86 |       |       |       |       |       |       |
| 902 | 3,7 | 12,57 | 31,57 | 43,01 | 13,58 | 17,99 | 0,754 | 1,661 |
| 903 | 4,6 | 21,43 | 33,28 | 43,93 | 14,62 | 18,66 | 0,783 | 1,722 |
| 904 |     | 11,43 |       |       |       |       |       |       |
| 905 | 4,1 | 13,86 | 37,25 | 43,38 | 16,16 | 21,09 | 0,766 | 1,884 |
| 906 | 5,4 | 20,28 | 39,36 | 44,58 | 17,55 | 21,81 | 0,804 | 1,949 |
| 907 | 4,5 | 11,28 | 30,85 | 41,58 | 12,83 | 18,02 | 0,711 | 1,668 |
| 908 | 4,3 | 20,28 | 30,7  | 41,33 | 12,69 | 18,01 | 0,704 | 1,668 |
| 909 |     | 10,86 |       |       |       |       |       |       |
| 910 |     | 11,14 |       |       |       |       |       |       |
| 911 |     | 13,14 |       |       |       |       |       |       |
| 912 |     | 11,86 |       |       |       |       |       |       |
| 913 | 4,5 | 20,28 | 34,43 | 41,88 | 14,42 | 20,01 | 0,72  | 1,847 |
| 914 | 3,7 | 11,72 | 33,22 | 41,57 | 13,81 | 19,41 | 0,711 | 1,771 |
| 915 | 4,1 | 19,72 | 37,78 | 44,81 | 16,93 | 20,85 | 0,811 | 2,059 |
| 916 | 3,6 | 11,43 | 35,25 | 43,09 | 15,19 | 20,06 | 0,757 | 2,037 |
| 917 |     | 12,14 |       |       |       |       |       |       |
| 918 | 4,2 | 23,72 |       |       |       |       |       |       |
| 919 | 4,5 | 12,72 |       |       |       |       |       |       |
| 920 |     | 12    |       |       |       |       |       |       |
| 921 |     | 12,86 |       |       |       |       |       |       |
| 922 | 3,4 | 13,72 | 27,86 | 43,43 | 12,1  | 15,76 | 0,767 | 1,438 |
| 923 | 3,2 | 20,28 | 27,57 | 43,38 | 11,96 | 15,61 | 0,766 | 1,452 |

|     |     |       |       |       |       |       |       |       |
|-----|-----|-------|-------|-------|-------|-------|-------|-------|
| 924 |     | 12,86 |       |       |       |       |       |       |
| 925 | 4,4 | 27,72 | 37,82 | 46,35 | 17,53 | 20,29 | 0,863 | 1,856 |
| 926 | 3,4 | 11    | 35,58 | 44,32 | 15,77 | 19,81 | 0,796 | 1,838 |
| 927 | 4,2 | 21,28 | 33,3  | 43    | 14,32 | 18,98 | 0,754 | 1,687 |
| 928 | 3,6 | 11,28 | 30,65 | 40,84 | 12,52 | 18,13 | 0,69  | 1,63  |
| 929 | 3,8 | 20,43 | 32,8  | 41,98 | 13,77 | 19,03 | 0,723 | 1,697 |
| 930 | 3,8 | 12,86 | 32,21 | 41,41 | 13,34 | 18,87 | 0,706 | 1,669 |
| 931 | 4,1 | 12,72 | 34,86 | 44,52 | 15,52 | 19,34 | 0,802 | 1,736 |
| 932 | 4,3 | 20,43 |       |       |       |       |       |       |
| 933 | 3,6 | 11,43 | 39,88 | 44,5  | 17,75 | 22,13 | 0,802 | 1,962 |
| 934 | 3,5 | 11    | 33,82 | 43,31 | 14,65 | 19,17 | 0,764 | 1,811 |
| 935 | 4,3 | 20    | 32,33 | 43,61 | 14,1  | 18,23 | 0,773 | 1,707 |
| 936 | 4,7 | 20,28 |       |       |       |       |       |       |
| 937 | 4,6 | 12,28 | 43,14 | 44,92 | 19,38 | 23,76 | 0,815 | 2,241 |
| 938 | 4,2 | 20,28 | 34,67 | 47,27 | 16,39 | 18,28 | 0,896 | 1,837 |
| 939 | 4   | 12,28 | 32,61 | 45,35 | 14,79 | 17,82 | 0,829 | 1,791 |
| 940 | 4,5 | 20,72 | 36,9  | 43,44 | 16,03 | 20,87 | 0,768 | 1,985 |
| 941 | 3,8 | 11,14 | 37,03 | 43,42 | 16,08 | 20,95 | 0,767 | 1,997 |
| 942 | 5,4 | 20,28 | 36,99 | 42,57 | 15,75 | 21,24 | 0,741 | 1,992 |
| 943 | 4,3 | 12,28 |       |       |       |       |       |       |
| 944 |     | 13,57 |       |       |       |       |       |       |
| 945 | 4,7 | 24    | 31,49 | 40,93 | 12,89 | 18,6  | 0,693 | 1,741 |
| 946 | 4,4 | 12,28 | 31,08 | 41,11 | 12,78 | 18,3  | 0,698 | 1,694 |
| 947 | 4,1 | 12,86 | 31,04 | 42,2  | 13,1  | 17,94 | 0,73  | 1,802 |
| 948 | 4,9 | 19,86 | 38,76 | 46,51 | 18,03 | 20,73 | 0,869 | 2,126 |
| 949 | 4,6 | 11,86 | 37,22 | 45,35 | 16,88 | 20,34 | 0,829 | 2,094 |
| 950 | 5,5 | 20,57 | 35,19 | 41,94 | 14,76 | 20,43 | 0,722 | 2,003 |
| 951 | 4,8 | 12,86 | 33,87 | 41,39 | 14,02 | 19,85 | 0,706 | 1,956 |
| 952 |     | 12,28 |       |       |       |       |       |       |
| 953 | 4,1 | 12,57 | 36    | 43,22 | 15,56 | 20,44 | 0,761 | 1,833 |
| 954 | 4,9 | 20,72 | 31,5  | 41,2  | 12,98 | 18,52 | 0,7   | 1,721 |
| 955 | 4   | 12,57 | 29,53 | 39,65 | 11,71 | 17,82 | 0,657 | 1,671 |
| 956 | 5,7 | 21,14 | 34,68 | 42,7  | 14,81 | 19,87 | 0,745 | 2,028 |

|     |     |       |       |       |       |       |       |       |
|-----|-----|-------|-------|-------|-------|-------|-------|-------|
| 957 | 5,2 | 13,43 | 32,33 | 40,89 | 13,22 | 19,11 | 0,691 | 1,961 |
| 958 | 4,3 | 11,86 | 33,25 | 42,37 | 14,09 | 19,16 | 0,735 | 1,773 |
| 959 | 5,3 | 20,28 | 35,46 | 44,1  | 15,64 | 19,82 | 0,789 | 1,854 |
| 960 | 4   | 13    | 31,12 | 41,19 | 12,82 | 18,3  | 0,7   | 1,775 |
| 961 | 3,6 | 20,43 | 41,04 | 44,88 | 18,42 | 22,62 | 0,814 | 2,018 |
| 962 | 3,3 | 11,72 | 39,1  | 44,09 | 17,24 | 21,86 | 0,788 | 2,018 |
| 963 | 4,1 | 12,28 | 33,58 | 40,64 | 13,65 | 19,93 | 0,684 | 1,777 |
| 964 | 3,8 | 20,28 | 36,02 | 42,55 | 15,33 | 20,69 | 0,74  | 1,844 |
| 965 | 4,2 | 33    | 35,18 | 44,31 | 15,59 | 19,59 | 0,795 | 1,879 |
| 966 | 4,4 | 19,28 | 33,18 | 43,94 | 14,58 | 18,6  | 0,783 | 1,82  |
| 967 | 4,1 | 11,28 | 31,08 | 41,24 | 12,82 | 18,26 | 0,702 | 1,807 |
| 968 | 3,4 | 11,28 | 32,53 | 43,03 | 14    | 18,53 | 0,755 | 1,673 |
| 969 | 3,9 | 19,28 | 32,48 | 43,34 | 14,08 | 18,4  | 0,765 | 1,673 |
| 970 | 4,3 | 19,43 | 39,56 | 45,52 | 18,01 | 21,55 | 0,835 | 2,021 |
| 971 | 4   | 14,28 | 40,04 | 46,05 | 18,44 | 21,6  | 0,853 | 1,997 |
| 972 |     | 10,57 |       |       |       |       |       |       |
| 973 |     | 13,28 |       |       |       |       |       |       |
| 974 | 3,6 | 12,57 | 30,06 | 42,08 | 12,65 | 17,41 | 0,726 | 1,689 |
| 975 | 4,3 | 20    | 31    | 42,38 | 13,14 | 17,86 | 0,735 | 1,727 |
| 976 | 6,2 | 20,57 | 40,51 | 43,54 | 17,64 | 22,87 | 0,771 | 2,243 |
| 977 | 5,4 | 12,57 | 37,99 | 42,82 | 16,27 | 21,72 | 0,749 | 2,19  |
| 978 |     | 12,57 |       |       |       |       |       |       |
| 979 | 3,9 | 10,28 | 27,76 | 39,73 | 11,03 | 16,73 | 0,659 | 1,577 |
| 980 |     | 12,86 |       |       |       |       |       |       |
| 981 | 4,9 | 26,14 |       |       |       |       |       |       |
| 982 | 4,1 | 10,86 |       |       |       |       |       |       |
| 983 | 4,7 | 25,86 |       |       |       |       |       |       |
| 984 | 3,9 | 12    | 34,29 | 44,47 | 15,25 | 19,04 | 0,8   | 1,7   |
| 985 | 5,5 | 20,14 |       |       |       |       |       |       |
| 986 | 5,2 | 13,14 | 34,08 | 43,77 | 14,92 | 19,16 | 0,778 | 1,861 |
| 987 | 4   | 11,18 | 29,99 | 40,78 | 12,23 | 17,76 | 0,688 | 1,554 |
| 988 | 4,5 | 20,14 | 30,81 | 41,05 | 12,65 | 18,16 | 0,696 | 1,602 |
| 989 | 5,1 | 12,43 | 33,41 | 44,32 | 14,81 | 18,6  | 0,796 | 1,729 |

|      |     |       |       |       |       |       |       |       |
|------|-----|-------|-------|-------|-------|-------|-------|-------|
| 990  | 5,8 | 20,43 | 35,02 | 45,6  | 15,97 | 19,05 | 0,838 | 1,766 |
| 991  | 4,2 | 10,86 | 33,71 | 42,09 | 14,19 | 19,52 | 0,726 | 1,851 |
| 992  | 4,8 | 20,43 | 32,95 | 41,45 | 13,66 | 19,29 | 0,708 | 1,844 |
| 993  | 4,3 | 12,43 | 34,44 | 44,51 | 15,33 | 19,11 | 0,802 | 1,897 |
| 994  | 4   | 21    | 39,59 | 44,6  | 17,66 | 21,93 | 0,805 | 2,038 |
| 995  | 3,7 | 30,14 | 40,32 | 46,77 | 18,86 | 21,46 | 0,787 | 2,062 |
| 996  | 3,9 | 13,72 | 37,23 | 43,32 | 16,13 | 21,1  | 0,764 | 2,032 |
| 997  | 4,6 | 20,28 | 36,84 | 45,05 | 16,6  | 20,24 | 0,82  | 1,95  |
| 998  | 4,5 | 13,86 | 35,6  | 43,82 | 15,6  | 20    | 0,78  | 1,914 |
| 999  |     | 12    |       |       |       |       |       |       |
| 1000 |     | 12,28 |       |       |       |       |       |       |
| 1001 |     | 12,14 |       |       |       |       |       |       |
| 1002 |     | 12    |       |       |       |       |       |       |
| 1003 | 5,5 | 33,14 | 50,53 | 47,04 | 23,77 | 26,76 | 0,888 | 2,558 |
| 1004 | 5,5 | 20,28 | 49,46 | 48,84 | 24,16 | 25,3  | 0,954 | 2,5   |
| 1005 | 5,6 | 13,14 | 45,37 | 46,59 | 21,14 | 24,23 | 0,872 | 2,467 |
| 1006 | 5,5 | 30,43 | 46,49 | 46,28 | 21,52 | 24,97 | 0,861 | 2,294 |
| 1007 | 4,7 | 20,43 | 44,28 | 45,14 | 19,99 | 24,29 | 0,822 | 2,222 |
| 1008 | 6,3 | 12,72 | 43,87 | 45,11 | 19,79 | 24,08 | 0,821 | 2,144 |
| 1009 | 5   | 12,72 | 35,6  | 45,19 | 16,09 | 19,51 | 0,824 | 1,943 |
| 1010 | 5,2 | 19,72 | 35,83 | 44,48 | 15,94 | 19,89 | 0,801 | 1,983 |
| 1011 | 4,6 | 12,86 | 38,64 | 43,89 | 16,96 | 21,68 | 0,782 | 2,091 |
| 1012 | 4,6 | 21,28 | 51,57 | 48,32 | 24,92 | 26,65 | 0,935 | 2,103 |
| 1013 | 4,6 | 20,72 | 33,41 | 42,53 | 14,21 | 19,2  | 0,74  | 1,837 |
| 1014 | 4,3 | 11,28 | 32,02 | 42,09 | 13,48 | 18,54 | 0,727 | 1,787 |
| 1015 |     | 12,14 |       |       |       |       |       |       |
| 1016 | 4,8 | 19,86 | 27,73 | 42,33 | 11,74 | 15,99 | 0,734 | 1,491 |
| 1017 | 4,7 | 12,86 | 26,57 | 41,13 | 10,93 | 15,64 | 0,698 | 1,462 |
| 1018 |     | 11    |       |       |       |       |       |       |
| 1019 | 4,5 | 20,14 | 28,77 | 41,04 | 11,81 | 16,96 | 0,696 | 1,634 |
| 1020 | 4,1 | 12,28 | 27,13 | 39,43 | 10,7  | 16,43 | 0,651 | 1,592 |
| 1021 |     | 12,43 |       |       |       |       |       |       |
| 1022 | 3,9 | 11,43 | 37,43 | 41,62 | 15,58 | 21,85 | 0,713 | 1,902 |



|      |     |       |       |       |       |       |       |       |
|------|-----|-------|-------|-------|-------|-------|-------|-------|
| 1023 | 4,3 | 20,43 | 37,43 | 41,35 | 15,48 | 21,95 | 0,705 | 1,947 |
| 1024 | 3,8 | 12,57 | 36,57 | 43,15 | 15,78 | 20,79 | 0,759 | 2,22  |
| 1025 |     | 12    |       |       |       |       |       |       |
| 1026 |     | 12,14 |       |       |       |       |       |       |
| 1027 | 4,1 | 21,43 | 31,72 | 44,82 | 14,22 | 17,5  | 0,812 | 1,605 |
| 1028 | 4,1 | 12,28 | 30,89 | 44,12 | 13,63 | 17,26 | 0,789 | 1,563 |
| 1029 | 4   | 20    |       |       |       |       |       |       |
| 1030 | 3,4 | 12,57 | 30,78 | 40,77 | 12,55 | 18,23 | 0,688 | 1,723 |
| 1031 | 3,4 | 32,86 | 36    | 46,13 | 16,61 | 19,39 | 0,856 | 1,941 |
| 1032 | 3,5 | 19,86 | 35,25 | 44,93 | 15,84 | 19,41 | 0,816 | 1,93  |
| 1033 | 3,3 | 12,72 | 35,53 | 45,73 | 16,25 | 19,28 | 0,842 | 1,919 |
| 1034 | 4,1 | 19,72 | 38,73 | 42,7  | 16,54 | 22,19 | 0,745 | 2,091 |
| 1035 | 4,2 | 10,72 | 38,85 | 42,9  | 16,67 | 22,18 | 0,751 | 2,061 |
| 1036 | 4,1 | 12    | 35,81 | 42,41 | 15,19 | 20,62 | 0,736 | 2,096 |
| 1037 | 4,4 | 13,57 | 41,93 | 44,97 | 18,86 | 23,07 | 0,817 | 1,981 |
| 1038 |     | 12    |       |       |       |       |       |       |
| 1039 | 4,6 | 20,14 | 33,87 | 39,82 | 13,49 | 20,38 | 0,661 | 1,972 |
| 1040 | 4,3 | 12,57 | 33,4  | 39,49 | 13,19 | 20,21 | 0,652 | 1,922 |
| 1041 | 4   | 12    | 32,34 | 40,69 | 13,16 | 19,18 | 0,686 | 1,702 |
| 1042 | 4,8 | 20    | 33,19 | 41,45 | 13,76 | 19,43 | 0,708 | 1,744 |
| 1043 | 4,7 | 19,72 | 34,47 | 43,6  | 15,03 | 19,44 | 0,773 | 1,798 |
| 1044 | 3,9 | 12,14 | 33,29 | 42,5  | 14,15 | 19,14 | 0,739 | 1,772 |
| 1045 | 4,1 | 36,72 | 40,05 | 44,64 | 17,88 | 22,17 | 0,806 | 2,145 |
| 1046 | 3,8 | 12,28 | 37,15 | 43,17 | 16,04 | 21,11 | 0,759 | 2,05  |
| 1047 | 4,6 | 22,72 | 37,88 | 43,21 | 16,37 | 21,51 | 0,761 | 2,061 |
| 1048 |     | 14,28 |       |       |       |       |       |       |
| 1049 | 3,7 | 11,86 | 29,5  | 43,69 | 12,89 | 16,61 | 0,776 | 1,593 |
| 1050 | 4,1 | 20,14 | 33,84 | 44,73 | 15,14 | 18,7  | 0,809 | 1,62  |
| 1051 |     | 12,28 |       |       |       |       |       |       |
| 1052 | 4,5 | 19,72 | 28,06 | 42,19 | 11,84 | 16,22 | 0,729 | 1,462 |
| 1053 | 4,1 | 11,72 | 27,74 | 42,6  | 11,82 | 15,92 | 0,742 | 1,407 |
| 1054 | 3,8 | 11,43 | 31,01 | 43,92 | 13,62 | 17,39 | 0,783 | 1,609 |
| 1055 | 4   | 20,43 | 31,78 | 44,33 | 14,09 | 17,69 | 0,796 | 1,622 |

|      |     |       |       |       |       |       |       |       |
|------|-----|-------|-------|-------|-------|-------|-------|-------|
| 1056 |     | 11,57 |       |       |       |       |       |       |
| 1057 | 4   | 20,43 | 35,36 | 42,61 | 15,07 | 20,29 | 0,742 | 1,967 |
| 1058 | 3,9 | 12    | 34,68 | 41,83 | 14,51 | 20,17 | 0,719 | 1,914 |
| 1059 | 3,7 | 11,57 | 33,65 | 43,95 | 14,79 | 18,86 | 0,784 | 1,738 |
| 1060 | 3,9 | 32,86 | 38,71 | 46,44 | 17,98 | 20,73 | 0,867 | 1,92  |
| 1061 | 3,8 | 20,14 | 35,73 | 45,25 | 16,17 | 19,56 | 0,826 | 1,825 |
| 1062 | 4,6 | 20,14 | 39,24 | 45,41 | 17,82 | 21,43 | 0,831 | 1,996 |
| 1063 | 3,6 | 12,28 | 37,39 | 44,85 | 16,77 | 20,62 | 0,813 | 1,962 |
| 1064 | 4,3 | 20    | 35,8  | 42,73 | 15,3  | 20,5  | 0,746 | 2,22  |
| 1065 | 4,4 | 29,14 | 33,25 | 44,24 | 14,75 | 18,54 | 0,793 | 1,831 |
| 1066 | 4   | 12,43 | 34,97 | 45,38 | 15,87 | 19,1  | 0,83  | 1,784 |
| 1067 | 4,3 | 20,57 | 36,32 | 45,89 | 16,67 | 19,65 | 0,848 | 1,844 |
| 1068 | 4   | 30,14 | 32,7  | 46,05 | 15,06 | 17,64 | 0,853 | 1,82  |
| 1069 | 3,6 | 20,14 | 32,71 | 45,52 | 14,89 | 17,82 | 0,835 | 1,831 |
| 1070 | 4,1 | 12,14 | 32,24 | 44,75 | 14,43 | 17,81 | 0,81  | 1,807 |
| 1071 | 4   | 11,72 | 32,41 | 43,44 | 14,08 | 18,33 | 0,768 | 1,858 |
| 1072 | 4,5 | 19,72 | 34,16 | 44,49 | 15,2  | 18,96 | 0,801 | 1,844 |
| 1073 |     | 12,14 |       |       |       |       |       |       |
| 1074 |     | 11,57 |       |       |       |       |       |       |
| 1075 | 3,5 | 11,86 | 38,05 | 45,44 | 17,29 | 20,76 | 0,832 | 1,899 |
| 1076 | 4,1 | 19,72 | 39,43 | 46,91 | 18,5  | 20,93 | 0,883 | 1,912 |
| 1077 |     | 12,57 |       |       |       |       |       |       |
| 1078 | 3,7 | 10,86 | 33,21 | 42,78 | 14,21 | 19    | 0,747 | 1,723 |
| 1079 | 5,2 | 20,43 | 45,72 | 46,08 | 21,07 | 24,65 | 0,854 | 2,342 |
| 1080 | 4,6 | 14    | 44,91 | 45,98 | 20,65 | 24,26 | 0,851 | 2,321 |
| 1081 |     | 11,43 |       |       |       |       |       |       |
| 1082 | 4,2 | 21,14 | 33,92 | 44,22 | 15    | 18,92 | 0,792 | 1,799 |
| 1083 | 3,7 | 10,86 | 32,19 | 42,87 | 13,8  | 18,39 | 0,75  | 1,746 |
| 1084 | 4,4 | 20,14 | 31,92 | 41,13 | 13,13 | 18,79 | 0,698 | 1,842 |
| 1085 | 4,4 | 11,14 | 33,06 | 41,22 | 13,63 | 19,43 | 0,701 | 1,855 |
| 1086 | 4,3 | 12,28 | 35,57 | 44,02 | 15,66 | 19,91 | 0,786 | 1,957 |
| 1087 | 5,2 | 20,43 | 48,06 | 52,28 | 25,13 | 22,93 | 1,095 | 1,957 |
| 1088 | 3,8 | 11,72 | 29,69 | 44,12 | 13,1  | 16,59 | 0,789 | 1,483 |

|      |     |       |       |       |       |       |       |       |
|------|-----|-------|-------|-------|-------|-------|-------|-------|
| 1089 |     | 12,72 |       |       |       |       |       |       |
| 1090 | 2,9 | 20,72 | 26,59 | 40,2  | 10,69 | 15,9  | 0,672 | 1,475 |
| 1091 | 3,3 | 10,28 | 24,89 | 38,16 | 9,5   | 15,39 | 0,617 | 1,468 |
| 1092 |     | 11,43 |       |       |       |       |       |       |
| 1093 | 3,3 | 12    | 25,94 | 41,82 | 10,85 | 15,09 | 0,719 | 1,356 |
| 1094 |     | 11,43 |       |       |       |       |       |       |
| 1095 | 4,8 | 21    | 35,16 | 43,37 | 15,25 | 19,91 | 0,765 | 1,833 |
| 1096 | 5   | 12,28 | 36,58 | 44,45 | 16,26 | 20,32 | 0,8   | 1,806 |
| 1097 | 4,9 | 9,86  | 35,76 | 40,4  | 14,45 | 21,31 | 0,678 | 1,985 |
| 1098 | 5,7 | 19,57 |       |       |       |       |       |       |
| 1099 | 4,6 | 32,43 | 37,59 | 44,98 | 16,91 | 20,68 | 0,817 | 1,951 |
| 1100 | 4,3 | 21,28 | 34,86 | 43,31 | 15,1  | 19,76 | 0,764 | 1,864 |
| 1101 | 3,9 | 11,14 | 34,63 | 43,54 | 15,08 | 19,55 | 0,771 | 1,83  |
| 1102 |     | 12,28 |       |       |       |       |       |       |
| 1103 | 5   | 30    | 36,38 | 44,61 | 16,23 | 20,15 | 0,805 | 1,991 |
| 1104 | 5,3 | 20,72 | 34,24 | 43,34 | 14,84 | 19,4  | 0,764 | 1,931 |
| 1105 | 4,2 | 10,57 | 34,77 | 44,2  | 15,37 | 19,4  | 0,792 | 1,881 |
| 1106 | 3,8 | 21,14 | 32,67 | 43,52 | 14,22 | 18,45 | 0,77  | 1,697 |
| 1107 | 3,7 | 11,28 | 32,46 | 42,42 | 13,77 | 18,69 | 0,736 | 1,67  |
| 1108 | 4,1 | 20,72 | 37,3  | 46,4  | 17,31 | 19,99 | 0,865 | 1,913 |
| 1109 | 3   | 11,72 | 38,33 | 46,15 | 17,69 | 20,64 | 0,857 | 1,913 |
| 1110 | 4,5 | 32,14 | 36,11 | 42,53 | 15,36 | 20,75 | 0,74  | 1,852 |
| 1111 | 4,8 | 21,43 | 36,3  | 43,91 | 15,94 | 20,36 | 0,782 | 1,839 |
| 1112 | 4,4 | 12,43 | 34    | 42,2  | 14,35 | 19,65 | 0,73  | 1,786 |
| 1113 |     | 13,28 |       |       |       |       |       |       |
| 1114 | 5,1 | 21,72 | 35,51 | 43,64 | 15,5  | 20,01 | 0,774 | 1,891 |
| 1115 | 3,7 | 12,14 | 34    | 41,82 | 14,22 | 19,78 | 0,718 | 1,82  |
| 1116 |     | 12,72 |       |       |       |       |       |       |
| 1117 | 4,1 | 11,28 | 36,59 | 43,2  | 15,81 | 20,78 | 0,76  | 2,037 |
| 1118 | 4   | 28,28 | 38,97 | 44,29 | 17,26 | 21,71 | 0,795 | 2,152 |
| 1119 | 4   | 19,28 | 42,31 | 44,05 | 18,64 | 23,67 | 0,787 | 2,083 |
| 1120 |     | 12,57 |       |       |       |       |       |       |
| 1121 | 4,8 | 20,86 | 35,06 | 45,23 | 15,86 | 19,2  | 0,826 | 1,67  |

|      |     |       |       |       |       |       |       |       |
|------|-----|-------|-------|-------|-------|-------|-------|-------|
| 1122 | 4,8 | 12,28 | 32,71 | 43,25 | 14,15 | 18,56 | 0,762 | 1,615 |
| 1123 | 3,9 | 13,14 | 41,78 | 44,63 | 18,65 | 23,13 | 0,806 | 2,167 |
| 1124 | 4,3 | 20,14 | 42    | 44,71 | 18,78 | 23,22 | 0,808 | 2,19  |
| 1125 | 4,5 | 19,43 | 27,9  | 41,43 | 11,56 | 16,34 | 0,707 | 1,532 |
| 1126 | 3,9 | 12    | 26,56 | 40,28 | 10,7  | 15,86 | 0,674 | 1,481 |
| 1127 |     | 12,14 |       |       |       |       |       |       |
| 1128 | 4,4 | 20,28 | 40,3  | 45,13 | 18,19 | 22,11 | 0,822 | 2,151 |
| 1129 |     | 12,72 |       |       |       |       |       |       |
| 1130 | 4   | 12,28 | 39,74 | 44,81 | 17,81 | 21,93 | 0,812 | 2,118 |
| 1131 | 3,8 | 20,28 | 30,82 | 42,18 | 13    | 17,82 | 0,729 | 1,673 |
| 1132 | 3,8 | 12    | 30,48 | 42,15 | 12,85 | 17,63 | 0,728 | 1,554 |
| 1133 | 5,1 | 21,14 | 30,78 | 42,69 | 13,14 | 17,64 | 0,744 | 1,601 |
| 1134 | 3,8 | 12,43 | 31,72 | 40,54 | 12,86 | 18,86 | 0,681 | 1,659 |
| 1135 | 4,8 | 30,57 | 33,49 | 44,19 | 14,8  | 18,69 | 0,791 | 1,873 |
| 1136 | 4,5 | 20,28 | 31,82 | 41,57 | 13,23 | 18,59 | 0,711 | 1,833 |
| 1137 | 4,4 | 11,86 | 31,84 | 42,43 | 13,51 | 18,33 | 0,737 | 1,814 |
| 1138 | 4,5 | 20,28 | 34,79 | 46,42 | 16,15 | 18,64 | 0,866 | 1,712 |
| 1139 | 3,9 | 11,28 | 38,13 | 45,05 | 17,18 | 20,95 | 0,82  | 1,678 |
| 1140 |     | 11,43 |       |       |       |       |       |       |
| 1141 | 4,3 | 12,72 | 35,18 | 44,54 | 15,67 | 19,51 | 0,803 | 1,772 |
| 1142 | 4   | 12,72 | 34,04 | 43,24 | 14,72 | 19,32 | 0,761 | 1,778 |
| 1143 | 4,1 | 12    |       |       |       |       |       |       |
| 1144 | 3,4 | 13    | 29,99 | 41,34 | 12,4  | 17,59 | 0,704 | 1,578 |
| 1145 | 4,3 | 19,14 | 35,73 | 44,58 | 15,93 | 19,8  | 0,804 | 1,791 |
| 1146 | 4,6 | 20,86 | 36,46 | 43,58 | 15,89 | 20,57 | 0,772 | 1,911 |
| 1147 | 4,4 | 20,72 | 31,46 | 41,73 | 13,13 | 18,33 | 0,716 | 1,65  |
| 1148 | 4,5 | 12,43 | 35,48 | 42,81 | 15,19 | 20,29 | 0,748 | 1,911 |
| 1149 | 5   | 19,72 | 35,85 | 43,73 | 15,68 | 20,17 | 0,777 | 1,783 |
| 1150 | 4,9 | 12,14 | 35,32 | 43,71 | 15,44 | 19,88 | 0,776 | 1,721 |
| 1151 | 3,8 | 13,14 | 32,43 | 42,89 | 13,91 | 18,52 | 0,751 | 1,638 |
| 1152 | 4,4 | 20    | 31,5  | 41,42 | 13,05 | 18,45 | 0,707 | 1,65  |
| 1153 | 4   | 13    | 29,01 | 41,5  | 12,04 | 16,97 | 0,709 | 1,605 |
| 1154 |     | 12,72 |       |       |       |       |       |       |

|      |     |       |       |       |       |       |       |       |
|------|-----|-------|-------|-------|-------|-------|-------|-------|
| 1155 | 4,5 | 19,86 | 33,27 | 42,35 | 14,09 | 19,18 | 0,734 | 1,777 |
| 1156 | 3,5 | 11,86 | 34,42 | 44,47 | 15,31 | 19,11 | 0,801 | 1,749 |
| 1157 | 3,7 | 12,28 | 30,81 | 40,18 | 12,38 | 18,43 | 0,671 | 1,733 |
| 1158 | 3,6 | 19,43 | 34,81 | 45,33 | 15,78 | 19,03 | 0,829 | 1,762 |
| 1159 | 5,9 | 20,28 | 35,67 | 44,18 | 15,76 | 19,91 | 0,791 | 1,869 |
| 1160 | 5   | 12,86 | 33,32 | 42,43 | 14,14 | 19,18 | 0,737 | 1,818 |
| 1161 |     | 11,28 |       |       |       |       |       |       |
| 1162 | 4,4 | 20,57 | 31,61 | 41,5  | 13,12 | 18,49 | 0,709 | 1,714 |
| 1163 | 4,6 | 12,43 | 30,72 | 40,16 | 12,34 | 18,38 | 0,671 | 1,741 |
| 1164 |     | 11,86 |       |       |       |       |       |       |
| 1165 |     | 12,14 |       |       |       |       |       |       |
| 1166 |     | 13    |       |       |       |       |       |       |
| 1167 | 3,9 | 11,86 | 29,65 | 41,68 | 12,36 | 17,29 | 0,714 | 1,539 |
| 1168 |     | 11,43 |       |       |       |       |       |       |
| 1169 | 4,2 | 20,43 | 34,56 | 42,5  | 14,69 | 19,87 | 0,739 | 1,794 |
| 1170 | 4,2 | 11,72 | 33,85 | 42,51 | 14,39 | 19,46 | 0,739 | 1,739 |
| 1171 | 4,7 | 21,43 | 38,47 | 44,78 | 17,23 | 21,24 | 0,811 | 1,818 |
| 1172 | 4,2 | 19,72 | 33,82 | 45,38 | 15,35 | 18,47 | 0,831 | 1,788 |
| 1173 | 3,8 | 13,43 | 36,73 | 44,05 | 16,18 | 20,55 | 0,787 | 1,758 |
| 1174 | 3,6 | 12,28 | 32,52 | 44,15 | 14,36 | 18,16 | 0,79  | 1,751 |
| 1175 | 4,6 | 20,86 | 35,15 | 44,21 | 15,54 | 19,61 | 0,792 | 1,926 |
| 1176 | 5,1 | 11,86 | 36,02 | 43,33 | 15,61 | 20,41 | 0,764 | 1,938 |
| 1177 | 3,9 | 12,72 | 30,29 | 42,48 | 12,87 | 17,42 | 0,738 | 1,632 |
| 1178 | 4,2 | 20,14 | 30,82 | 43,47 | 13,4  | 17,42 | 0,769 |       |
| 1179 | 4,3 | 13,28 | 34,26 | 43,89 | 15,04 | 19,22 | 0,782 | 1,882 |
| 1180 |     | 12,14 |       |       |       |       |       |       |
| 1181 | 4,7 | 20,43 | 41,24 | 45,92 | 18,94 | 22,3  | 0,849 | 1,892 |
| 1182 | 4,3 | 12,57 | 34,91 | 42,53 | 14,85 | 20,06 | 0,74  | 1,82  |
| 1183 | 4,1 | 20,86 | 33,46 | 43,15 | 14,44 | 19,02 | 0,759 | 1,709 |
| 1184 | 3,9 | 21,28 | 35,8  | 43,51 | 15,58 | 20,22 | 0,77  | 1,87  |
| 1185 | 4,2 | 12,57 | 32,63 | 42,78 | 13,96 | 18,67 | 0,747 | 1,702 |
| 1186 | 4,1 | 12,86 | 32,68 | 43,14 | 14,1  | 18,58 | 0,758 | 1,64  |
| 1187 | 5,7 | 21,14 | 39,17 | 44,31 | 17,36 | 21,81 | 0,795 | 2,072 |

|      |     |       |       |       |       |       |       |       |
|------|-----|-------|-------|-------|-------|-------|-------|-------|
| 1188 | 3,6 | 11,72 | 34,4  | 42,93 | 14,77 | 19,63 | 0,752 | 1,807 |
| 1189 | 3,5 | 13,14 | 24,69 | 38,88 | 9,6   | 15,09 | 0,636 | 1,5   |
| 1190 | 5,6 | 13,14 | 37,65 | 43,85 | 16,51 | 21,14 | 0,78  | 2,003 |
| 1191 | 4,2 | 20    | 34,55 | 44,51 | 15,38 | 19,17 | 0,802 | 1,736 |
| 1192 | 4,5 | 36,14 | 40,78 | 45,95 | 18,74 | 22,04 | 0,85  | 2,05  |
| 1193 | 4,2 | 20,57 | 35,45 | 42,42 | 15,04 | 20,41 | 0,736 | 1,923 |
| 1194 | 4,7 | 12,72 | 37,96 | 42,67 | 16,2  | 21,76 | 0,744 | 2,062 |
| 1195 | 3,9 | 13    | 34,43 | 41,47 | 14,28 | 20,15 | 0,708 | 1,87  |
| 1196 | 4,8 | 19,86 | 41,01 | 45,15 | 18,52 | 22,49 | 0,823 | 2,042 |
| 1197 |     | 11,86 |       |       |       |       |       |       |
| 1198 | 3,5 | 12,28 | 32,25 | 43,34 | 13,98 | 18,27 | 0,765 | 1,704 |
| 1199 | 3,9 | 19,28 | 32,55 | 43,34 | 14,11 | 18,44 | 0,765 | 1,743 |
| 1200 |     | 13,14 |       |       |       |       |       |       |
| 1201 |     | 11,86 |       |       |       |       |       |       |
| 1202 |     | 11,86 |       |       |       |       |       |       |
| 1203 | 4,1 | 33,86 | 36,27 | 45,05 | 16,34 | 19,93 | 0,819 | 1,988 |
| 1204 | 3,4 | 27,86 | 34,49 | 44,12 | 15,22 | 19,27 | 0,789 | 1,885 |
| 1205 | 3,7 | 13,14 | 33,39 | 44,41 | 14,83 | 18,56 | 0,799 | 1,788 |
| 1206 | 4,8 | 19,86 | 33,77 | 43,61 | 14,73 | 19,04 | 0,773 | 1,813 |
| 1207 | 4,4 | 12,86 | 31,79 | 41,8  | 13,29 | 18,5  | 0,718 | 1,768 |
| 1208 | 4,5 | 11,43 | 32,37 | 43,71 | 14,15 | 18,22 | 0,776 | 1,632 |
| 1209 | 3,6 | 20,86 | 27,53 | 41,95 | 11,55 | 15,98 | 0,722 | 1,434 |
| 1210 | 4,1 | 12,86 | 35,76 | 42,39 | 15,16 | 20,6  | 0,735 | 1,909 |
| 1211 | 3,8 | 13,14 | 27,81 | 43,86 | 12,2  | 15,61 | 0,789 | 1,391 |
| 1212 |     | 12,43 |       |       |       |       |       |       |
| 1213 | 4,6 | 19,14 | 36,23 | 44,99 | 16,3  | 19,93 | 0,817 | 1,941 |
| 1214 | 4,6 | 12,14 | 32,81 | 39,98 | 13,12 | 19,69 | 0,666 | 1,818 |
| 1215 | 4,4 | 20,43 | 39,13 | 45,79 | 17,92 | 21,21 | 0,844 | 1,939 |
| 1216 | 3,6 | 13,72 | 34,84 | 43,48 | 15,15 | 19,69 | 0,769 | 1,885 |
| 1217 |     | 12,28 |       |       |       |       |       |       |
| 1218 | 4   | 10,57 | 37,88 | 45,24 | 17,14 | 20,74 | 0,826 | 1,902 |
| 1219 | 3,6 | 11,57 | 37,09 | 44,18 | 16,39 | 20,7  | 0,791 | 1,972 |
| 1220 | 5,2 | 20,72 | 32,01 | 41,08 | 13,15 | 18,86 | 0,697 | 1,862 |

|      |     |       |       |       |       |       |       |       |
|------|-----|-------|-------|-------|-------|-------|-------|-------|
| 1221 | 4,7 | 20,57 | 40,75 | 44,09 | 17,97 | 22,78 | 0,788 | 2,265 |
| 1222 |     | 12,28 |       |       |       |       |       |       |
| 1223 | 3,5 | 12,57 | 39,59 | 43,49 | 17,22 | 22,37 | 0,769 | 2,188 |
| 1224 | 3   | 20,57 | 37,12 | 43,69 | 16,22 | 20,9  | 0,776 | 2,02  |
| 1225 |     | 12    |       |       |       |       |       |       |
| 1226 | 4,2 | 12,57 | 37,51 | 44,14 | 16,56 | 20,95 | 0,79  | 1,979 |
| 1227 | 4   | 12,86 | 33,28 | 43,29 | 14,41 | 18,87 | 0,763 | 1,699 |
| 1228 | 4,5 | 22    | 36,78 | 43,82 | 16,12 | 20,66 | 0,78  | 1,93  |
| 1229 | 4   | 13,14 | 35,34 | 42,84 | 15,14 | 20,2  | 0,749 | 1,867 |
| 1230 |     | 11,86 |       |       |       |       |       |       |
| 1231 |     | 20,57 | 36,62 | 45,24 | 16,57 | 20,05 | 0,826 | 1,909 |
| 1232 | 3,3 | 13,72 | 34,82 | 45,08 | 15,7  | 19,12 | 0,821 | 1,885 |
| 1233 |     | 12    |       |       |       |       |       |       |
| 1234 |     | 11,86 |       |       |       |       |       |       |
| 1235 | 5,1 | 19,14 | 37,75 | 45,11 | 17,03 | 20,72 | 0,821 | 2,042 |
| 1236 | 3,5 | 12,72 | 36,55 | 44,35 | 16,21 | 20,34 | 0,796 | 2,014 |
| 1237 | 4,2 | 12    | 35,06 | 42,95 | 15,06 | 20    | 0,753 | 1,828 |
| 1238 | 4,3 | 21    | 37,14 | 44,02 | 16,35 | 20,79 | 0,786 | 1,894 |
| 1239 | 5   | 19,86 |       |       |       |       |       |       |
| 1240 | 4,3 | 12    | 34,31 | 45,2  | 15,51 | 18,8  | 0,825 | 1,725 |
| 1241 |     | 13,14 |       |       |       |       |       |       |
| 1242 | 4,7 | 21,28 | 33,37 | 44,71 | 14,92 | 18,45 | 0,808 | 1,768 |
| 1243 | 3,4 | 10,28 | 32,32 | 43,75 | 14,14 | 18,18 | 0,777 | 1,721 |
| 1244 |     | 11,86 |       |       |       |       |       |       |
| 1245 |     | 12,72 |       |       |       |       |       |       |
| 1246 | 4,3 | 11,57 | 34,33 | 43,78 | 15,03 | 19,3  | 0,778 | 1,765 |
| 1247 | 4,7 | 20,43 | 36,3  | 44,82 | 16,27 | 20,03 | 0,812 | 1,881 |
| 1248 |     | 11,86 |       |       |       |       |       |       |
| 1249 | 4,4 | 14,18 | 31,55 | 42,37 | 13,37 | 18,18 | 0,735 | 1,685 |
| 1250 | 3,4 | 20,28 | 29,89 | 43,29 | 12,94 | 16,95 | 0,763 | 1,513 |
| 1251 | 2,9 | 12,28 | 29,18 | 42,8  | 12,49 | 16,69 | 0,748 | 1,484 |
| 1252 | 4,9 | 20,14 | 35,59 | 41,69 | 14,84 | 20,75 | 0,715 | 1,905 |
| 1253 | 4,8 | 12,43 | 33,21 | 40,98 | 13,61 | 19,6  | 0,694 | 1,854 |

|      |     |       |       |       |       |       |       |       |
|------|-----|-------|-------|-------|-------|-------|-------|-------|
| 1254 | 4,2 | 20,14 | 37,13 | 43,38 | 16,11 | 21,02 | 0,766 | 1,914 |
| 1255 | 4,2 | 12,14 | 35,65 | 42,49 | 15,15 | 20,5  | 0,739 | 1,876 |
| 1256 |     | 12    |       |       |       |       |       |       |
| 1257 | 4,1 | 11,57 | 36,71 | 45,32 | 16,64 | 20,07 | 0,829 | 1,949 |
| 1258 | 4,4 | 19,57 | 36,71 | 45,54 | 16,72 | 19,99 | 0,836 | 1,949 |
| 1259 |     | 12    |       |       |       |       |       |       |
| 1260 | 3,9 | 20,14 | 35,19 | 42,99 | 15,13 | 20,06 | 0,754 | 1,699 |
| 1261 | 3,8 | 9,72  | 33,73 | 43,01 | 14,51 | 19,22 | 0,754 | 1,678 |
| 1262 |     | 12    |       |       |       |       |       |       |
| 1263 |     | 13,86 |       |       |       |       |       |       |
| 1264 | 4,9 | 20,86 | 42,9  | 42,44 | 18,21 | 24,69 | 0,737 | 2,687 |
| 1265 | 5,6 | 11,86 | 46,17 | 40,97 | 18,92 | 27,25 | 0,694 | 2,67  |
| 1266 | 3,9 | 11,14 | 37,45 | 44,32 | 16,6  | 20,85 | 0,796 | 2,02  |
| 1267 | 4,9 | 21    | 38,41 | 44,64 | 17,15 | 21,26 | 0,806 | 1,991 |
| 1268 | 4,4 | 13    | 35,78 | 43,01 | 15,39 | 20,39 | 0,754 | 1,906 |
| 1269 |     | 12    |       |       |       |       |       |       |
| 1270 |     | 12    |       |       |       |       |       |       |
| 1271 |     | 14,72 |       |       |       |       |       |       |
| 1272 | 4,4 | 19,57 | 36,79 | 42,89 | 15,78 | 21,01 | 0,751 | 1,862 |
| 1273 | 4,5 | 12,57 | 35,97 | 42,31 | 15,22 | 20,75 | 0,733 | 1,834 |
| 1274 | 3,9 | 20,14 | 30,51 | 42,21 | 12,88 | 17,63 | 0,73  | 1,694 |
| 1275 | 3,6 | 11,72 | 29,89 | 41,95 | 12,54 | 17,35 | 0,722 | 1,606 |
| 1276 |     | 11,72 |       |       |       |       |       |       |
| 1277 | 3,3 | 20    | 30,88 | 43,84 | 13,54 | 17,34 | 0,78  | 1,562 |
| 1278 | 3,2 | 13    | 29,24 | 43,05 | 12,59 | 16,65 | 0,756 | 1,513 |
| 1279 | 5   | 30,72 | 39,26 | 45,95 | 18,04 | 21,22 | 0,85  | 1,936 |
| 1280 | 4,7 | 20,18 | 40,27 | 45,81 | 18,45 | 21,82 | 0,845 | 1,865 |
| 1281 | 3,8 | 11,72 | 35,62 | 43,23 | 15,4  | 20,22 | 0,761 | 1,852 |
| 1282 | 3,8 | 20    | 32,55 | 42,51 | 13,84 | 18,71 | 0,739 | 1,706 |
| 1283 | 3,7 | 13    | 31,11 | 41,49 | 12,91 | 18,2  | 0,709 | 1,635 |
| 1284 |     | 11,43 |       |       |       |       |       |       |
| 1285 | 5,4 | 20    | 32,18 | 43,07 | 13,86 | 18,32 | 0,756 | 1,721 |
| 1286 | 4,2 | 11,43 | 31,04 | 41,14 | 12,77 | 18,27 | 0,698 | 1,714 |



|      |     |       |       |       |       |       |       |       |
|------|-----|-------|-------|-------|-------|-------|-------|-------|
| 1287 | 4   | 20,28 | 39,13 | 45,54 | 17,82 | 21,31 | 0,836 | 2,003 |
| 1288 | 3,7 | 10,72 | 36,41 | 43,77 | 15,94 | 20,47 | 0,778 | 1,911 |
| 1289 | 4   | 12,43 | 30,75 | 40,78 | 12,54 | 18,21 | 0,688 | 1,659 |
| 1290 | 4,4 | 21,28 | 33,13 | 42,25 | 14    | 19,13 | 0,731 | 1,714 |
| 1291 | 4,1 | 32,72 | 36,15 | 46,91 | 16,96 | 19,19 | 0,883 | 1,72  |
| 1292 | 4,3 | 22,72 | 31,92 | 43,2  | 13,79 | 18,13 | 0,76  | 1,628 |
| 1293 | 3,4 | 10,72 | 28,78 | 40,79 | 11,74 | 17,04 | 0,688 | 1,575 |
| 1294 | 3,8 | 20    | 32,38 | 43,69 | 14,15 | 18,23 | 0,776 | 1,737 |
| 1295 | 3,7 | 12,14 | 32,34 | 43,59 | 14,1  | 18,24 | 0,773 | 1,693 |
| 1296 |     | 12,72 |       |       |       |       |       |       |
| 1297 |     | 12,28 |       |       |       |       |       |       |
| 1298 | 3,9 | 20,43 | 30,36 | 42,49 | 12,9  | 17,46 | 0,738 | 1,689 |
| 1299 | 3,4 | 12,43 | 28,55 | 40,63 | 11,6  | 16,95 | 0,684 | 1,662 |
| 1300 |     | 12    |       |       |       |       |       |       |
| 1301 |     | 11,43 |       |       |       |       |       |       |
| 1302 | 4,8 | 21,86 | 35,17 | 42,87 | 15,08 | 20,09 | 0,75  | 1,991 |
| 1303 | 4,4 | 12,43 | 34,96 | 42,59 | 14,89 | 20,07 | 0,741 | 1,967 |
| 1304 | 3,4 | 12,28 | 33,51 | 41,39 | 13,87 | 19,64 | 0,706 | 1,553 |
| 1305 | 3,9 | 21,28 | 33,73 | 44,17 | 14,9  | 18,83 | 0,791 | 1,597 |
| 1306 | 3,7 | 35,28 | 37,35 | 45,19 | 16,88 | 20,47 | 0,824 | 1,87  |
| 1307 | 3,6 | 19,86 | 35,71 | 43,37 | 15,49 | 20,22 | 0,766 | 1,781 |
| 1308 | 3,1 | 12    | 34,38 | 43,6  | 14,99 | 19,39 | 0,773 | 1,733 |
| 1309 | 4   | 20,57 | 42,13 | 44,24 | 18,64 | 23,49 | 0,793 | 2,179 |
| 1310 | 4,1 | 12,57 | 39,82 | 42,84 | 17,06 | 22,76 | 0,749 | 2,144 |
| 1311 |     | 12,43 |       |       |       |       |       |       |
| 1312 | 4,3 | 20,86 | 33,89 | 41,39 | 14,03 | 19,86 | 0,706 | 1,831 |
| 1313 | 4   | 10,86 | 33,06 | 40,83 | 13,5  | 19,56 | 0,69  | 1,843 |
| 1314 | 4,3 | 19,43 | 37,23 | 43,54 | 16,21 | 21,02 | 0,771 | 2,232 |
| 1315 | 3,5 | 12,72 | 37,18 | 43,67 | 16,24 | 20,94 | 0,775 | 2,214 |
| 1316 | 4,2 | 19,72 | 36,5  | 43,61 | 15,92 | 20,58 | 0,773 | 1,892 |
| 1317 | 4,1 | 13,28 | 34,52 | 41,85 | 14,45 | 20,07 | 0,719 | 1,886 |
| 1318 | 3,9 | 18,14 | 38,58 | 45,12 | 17,41 | 21,17 | 0,822 | 2,014 |
| 1319 | 4,1 | 12,14 | 36,96 | 44,53 | 16,46 | 20,5  | 0,802 | 1,977 |

|      |     |       |       |       |       |       |       |       |
|------|-----|-------|-------|-------|-------|-------|-------|-------|
| 1320 | 5   | 20,28 | 39,1  | 44,34 | 17,34 | 21,76 | 0,796 | 2,024 |
| 1321 | 4,5 | 13,28 | 37,42 | 44,28 | 16,57 | 20,85 | 0,794 | 1,936 |
| 1322 | 3,5 | 13    | 31,24 | 43,69 | 13,65 | 17,59 | 0,776 | 1,685 |
| 1323 | 3,5 | 13    | 30,38 | 42,49 | 12,91 | 17,47 | 0,738 | 1,675 |
| 1324 | 4,2 | 20,14 | 35,19 | 45,18 | 15,9  | 19,29 | 0,824 | 1,723 |
| 1325 | 3,9 | 11,14 | 32,9  | 44,13 | 14,51 | 18,37 | 0,789 | 1,677 |
| 1326 | 3,7 | 20,14 | 35,36 | 45,3  | 16,02 | 19,34 | 0,828 | 1,747 |
| 1327 | 3,4 | 12,14 | 34,17 | 44,22 | 15,11 | 19,06 | 0,792 | 1,716 |
| 1328 |     | 10,57 |       |       |       |       |       |       |
| 1329 |     | 12,28 |       |       |       |       |       |       |
| 1330 |     | 12,28 |       |       |       |       |       |       |
| 1331 |     | 12,43 |       |       |       |       |       |       |
| 1332 | 4   | 11,43 | 28,26 | 43,02 | 12,16 | 16,1  | 0,755 | 1,584 |
| 1333 | 4,5 | 20,14 | 29,4  | 43,94 | 12,92 | 16,48 | 0,783 | 1,644 |
| 1334 |     | 13,14 |       |       |       |       |       |       |
| 1335 | 5,1 | 20,72 | 30    | 44,3  | 13,29 | 16,71 | 0,795 | 1,576 |
| 1336 | 4,3 | 12,86 | 29,41 | 43,48 | 12,79 | 16,62 | 0,769 | 1,576 |
| 1337 | 3,6 | 20    | 35,04 | 43,8  | 15,35 | 19,69 | 0,779 | 1,881 |
| 1338 | 3,5 | 12,28 | 33,9  | 43,95 | 14,9  | 19    | 0,784 | 1,818 |
| 1339 | 4,5 | 12,86 | 39,65 | 43,65 | 17,31 | 22,34 | 0,774 | 1,952 |
| 1340 | 4,8 | 20,86 | 40,16 | 43,89 | 17,63 | 22,53 | 0,782 | 1,977 |
| 1341 | 3,2 | 19,72 | 26,55 | 40,97 | 10,88 | 15,67 | 0,694 | 1,446 |
| 1342 | 3,2 | 11,72 | 26,65 | 42,92 | 11,44 | 15,21 | 0,752 | 1,376 |
| 1343 | 3,6 | 18,43 | 32,18 | 43,94 | 14,14 | 18,04 | 0,783 | 1,685 |
| 1344 | 3,2 | 13    | 32,14 | 43,34 | 13,93 | 18,21 | 0,764 | 1,672 |
| 1345 | 3,6 | 21    | 30,78 | 41,22 | 12,69 | 18,09 | 0,701 | 1,707 |
| 1346 | 3,3 | 12    | 31,37 | 39,52 | 12,4  | 18,97 | 0,653 | 1,672 |
| 1347 | 4   | 19,43 | 31,63 | 41,98 | 13,28 | 18,35 | 0,723 | 1,695 |
| 1348 | 3,1 | 10,72 | 30,13 | 40,88 | 12,32 | 17,81 | 0,691 | 1,643 |
| 1349 | 4,7 | 32,14 | 38,95 | 44,82 | 17,46 | 21,49 | 0,812 | 2,111 |
| 1350 | 4,5 | 12,28 | 28,69 | 40,92 | 11,74 | 16,95 | 0,692 | 1,709 |
| 1351 | 5,4 | 19,57 | 30,33 | 41,44 | 12,57 | 17,76 | 0,707 | 1,759 |
| 1352 | 3,3 | 12,43 |       |       |       |       |       |       |

|      |     |       |       |       |       |       |       |       |
|------|-----|-------|-------|-------|-------|-------|-------|-------|
| 1353 | 3,6 | 32    |       |       |       |       |       |       |
| 1354 | 3,8 | 19,86 |       |       |       |       |       |       |
| 1355 | 4,5 | 30,57 |       |       |       |       |       |       |
| 1356 | 4,4 | 24,28 |       |       |       |       |       |       |
| 1357 | 3,8 | 11    |       |       |       |       |       |       |
| 1358 | 3,7 | 12,57 | 37,01 | 43,74 | 16,19 | 20,82 | 0,777 | 1,955 |
| 1359 | 4,1 | 20,43 | 37,56 | 44,62 | 16,76 | 20,8  | 0,805 | 1,943 |
| 1360 | 3,6 | 12,28 | 34,31 | 42,11 | 14,45 | 19,86 | 0,727 | 1,806 |
| 1361 | 4,3 | 19,72 | 35,77 | 42,94 | 15,36 | 20,41 | 0,752 | 1,904 |
| 1362 |     | 12,28 |       |       |       |       |       |       |
| 1363 | 3,8 | 12,28 | 31,42 | 43,12 | 13,55 | 17,87 | 0,758 | 1,587 |
| 1364 | 4,2 | 20,28 | 32,08 | 43,17 | 13,85 | 18,23 | 0,759 | 1,63  |
| 1365 | 4   | 20,86 | 32,64 | 42,98 | 14,03 | 18,61 | 0,753 | 1,68  |
| 1366 | 3,6 | 12,86 | 31,46 | 41,73 | 13,13 | 18,33 | 0,716 | 1,644 |
| 1367 | 4,3 | 12,14 | 38,23 | 43,94 | 16,8  | 21,43 | 0,783 | 1,954 |
| 1368 | 4,5 | 20,14 | 38,78 | 44,55 | 17,28 | 21,5  | 0,803 | 1,978 |
| 1369 | 5   | 19,86 | 31,96 | 41,77 | 13,35 | 18,61 | 0,717 | 1,77  |
| 1370 | 4,1 | 12    |       |       |       |       |       |       |
| 1371 |     | 11,72 |       |       |       |       |       |       |
| 1372 | 4,3 | 11,72 | 30,14 | 42,7  | 12,87 | 17,27 | 0,745 | 1,657 |
| 1373 | 4,4 | 21,72 | 30,2  | 42,74 | 12,91 | 17,29 | 0,746 | 1,696 |
| 1374 | 3,8 | 12,43 | 35,88 | 44,62 | 16,01 | 19,87 | 0,805 | 1,859 |
| 1375 | 4,7 | 20,57 | 38,57 | 46,74 | 18,03 | 20,54 | 0,877 | 1,908 |
| 1376 | 4,3 | 20,14 |       |       |       |       |       |       |
| 1377 | 3,9 | 12,14 | 34,83 | 43,58 | 15,18 | 19,65 | 0,772 | 1,7   |
| 1378 | 4,7 | 20,14 | 30,56 | 42,76 | 13,07 | 17,49 | 0,747 | 1,585 |
| 1379 | 4   | 12,14 | 30,39 | 43,27 | 13,15 | 17,24 | 0,762 | 1,564 |
| 1380 | 4,4 | 12,57 | 34,66 | 43,24 | 14,99 | 19,67 | 0,762 | 1,823 |
| 1381 |     | 12,43 |       |       |       |       |       |       |
| 1382 | 4   | 20,43 | 34,72 | 42,88 | 14,89 | 19,83 | 0,75  | 1,739 |
| 1383 | 3,9 | 12,86 | 33,77 | 41,72 | 14,09 | 19,68 | 0,715 | 1,707 |
| 1384 | 4,1 | 13    | 35,39 | 44,22 | 15,65 | 19,74 | 0,792 | 1,822 |
| 1385 | 4,8 | 18,86 | 37,31 | 45,99 | 17,16 | 20,15 | 0,851 | 1,859 |

|      |     |       |       |       |       |       |       |       |
|------|-----|-------|-------|-------|-------|-------|-------|-------|
| 1386 | 6,1 | 30,43 |       |       |       |       |       |       |
| 1387 | 5,6 | 20,72 |       |       |       |       |       |       |
| 1388 | 4,4 | 12,43 |       |       |       |       |       |       |
| 1389 | 3,5 | 11,86 | 43,89 | 44,11 | 19,36 | 24,53 | 0,789 | 1,991 |
| 1390 | 4   | 20,28 | 37,1  | 44,17 | 16,39 | 20,71 | 0,791 | 1,991 |
| 1391 | 3,6 | 21,57 | 36,14 | 45,01 | 16,27 | 19,87 | 0,818 | 2,052 |
| 1392 | 3,4 | 11,57 | 33,15 | 42,14 | 13,97 | 19,18 | 0,728 | 2,04  |
| 1393 | 4,1 | 21,14 | 35,57 | 44,75 | 15,92 | 19,65 | 0,81  | 1,855 |
| 1394 | 4,1 | 12,14 | 34,47 | 43,98 | 15,16 | 19,31 | 0,785 | 1,767 |
| 1395 |     | 12,14 |       |       |       |       |       |       |
| 1396 | 4   | 20,43 | 36,98 | 45,02 | 16,65 | 20,33 | 0,818 | 1,907 |
| 1397 | 5,1 | 32,86 | 39,65 | 46,93 | 18,61 | 21,04 | 0,884 | 1,966 |
| 1398 | 3,7 | 12,43 | 35,99 | 44,92 | 16,17 | 19,82 | 0,815 | 1,876 |
| 1399 | 4   | 20    | 31,2  | 43,71 | 13,64 | 17,56 | 0,776 | 1,708 |
| 1400 | 3,9 | 12,43 | 31,32 | 43,86 | 13,74 | 17,58 | 0,781 | 1,689 |
| 1401 |     | 11,28 |       |       |       |       |       |       |
| 1402 | 3,7 | 20,43 | 32,54 | 45,32 | 14,75 | 17,79 | 0,829 | 1,714 |
| 1403 | 3,9 | 12,57 | 31,5  | 44,85 | 14,13 | 17,37 | 0,813 | 1,665 |
| 1404 |     | 12,14 |       |       |       |       |       |       |
| 1405 |     | 11,14 |       |       |       |       |       |       |
| 1406 |     | 12,14 |       |       |       |       |       |       |
| 1407 | 4,7 | 19,43 | 34,93 | 42,68 | 14,91 | 20,02 | 0,744 | 1,914 |
| 1408 | 4,9 | 11,72 | 35,05 | 42,68 | 14,96 | 20,09 | 0,744 | 1,878 |
| 1409 | 4,2 | 12,28 | 30,89 | 41,34 | 12,77 | 18,12 | 0,704 | 1,709 |
| 1410 | 4,3 | 20,86 | 32,92 | 43,71 | 14,39 | 18,53 | 0,776 | 1,762 |
| 1411 |     | 11,86 |       |       |       |       |       |       |
| 1412 | 5   | 20,28 | 32,02 | 43,94 | 14,07 | 17,95 | 0,783 | 1,704 |
| 1413 | 4,6 | 12,57 | 30,78 | 42,88 | 13,2  | 17,58 | 0,75  | 1,671 |
| 1414 | 3,8 | 11,72 | 31,24 | 41,19 | 12,87 | 18,37 | 0,7   | 1,687 |
| 1415 | 4,1 | 21,28 | 33,22 | 43,07 | 14,31 | 18,91 | 0,756 | 1,741 |
| 1416 | 3,9 | 12,72 | 33,98 | 42,28 | 14,37 | 19,61 | 0,732 | 1,778 |
| 1417 | 3,3 | 13    | 30,21 | 42,99 | 12,99 | 17,22 | 0,754 | 1,712 |
| 1418 | 4,1 | 20    | 30,8  | 44,02 | 13,56 | 17,24 | 0,786 | 1,758 |

|      |     |       |       |       |       |       |       |       |
|------|-----|-------|-------|-------|-------|-------|-------|-------|
| 1419 |     | 13    |       |       |       |       |       |       |
| 1420 | 4   | 10,86 | 33,16 | 44,24 | 14,67 | 18,49 | 0,793 | 1,645 |
| 1421 |     | 11,43 |       |       |       |       |       |       |
| 1422 | 4,5 | 12,14 | 30,72 | 43,03 | 13,22 | 17,5  | 0,755 | 1,669 |
| 1423 | 4,3 | 20,14 | 31,61 | 43,94 | 13,89 | 17,72 | 0,783 | 1,694 |
| 1424 | 4,1 | 13,57 | 31,45 | 41,52 | 13,06 | 18,39 | 0,71  | 1,669 |
| 1425 | 4,6 | 21,57 | 33,18 | 43,03 | 14,28 | 18,9  | 0,755 | 1,724 |
| 1426 | 3,1 | 20,72 | 29,42 | 43,09 | 12,68 | 16,74 | 0,757 | 1,636 |
| 1427 | 3,2 | 9,72  | 26,72 | 42,62 | 11,39 | 15,33 | 0,742 | 1,541 |
| 1428 | 4,2 | 19,72 | 35,56 | 44,15 | 15,7  | 19,86 | 0,79  | 1,907 |
| 1429 | 4   | 12,28 | 35,21 | 43,85 | 15,44 | 19,77 | 0,78  | 1,87  |
| 1430 | 4,1 | 13,72 |       |       |       |       |       |       |
| 1431 | 4,7 | 19,86 | 32,66 | 44,3  | 14,47 | 18,19 | 0,795 | 1,648 |
| 1432 | 3,9 | 20,86 | 38,98 | 45,38 | 17,69 | 21,29 | 0,83  | 2,037 |
| 1433 | 4   | 12,57 | 36,98 | 44,29 | 16,38 | 20,6  | 0,795 | 1,979 |
| 1434 | 4,9 | 19,57 | 33,66 | 45    | 15,15 | 18,51 | 0,818 | 1,839 |
| 1435 | 4,8 | 12,57 | 34,17 | 44,89 | 15,34 | 18,83 | 0,814 | 1,858 |
| 1436 | 4   | 26,28 | 32,83 | 41,94 | 13,77 | 19,06 | 0,722 | 1,938 |
| 1437 | 4,3 | 12,57 | 34,69 | 43,87 | 15,22 | 19,47 | 0,781 | 1,938 |
| 1438 | 4,1 | 28,57 | 32,45 | 41,72 | 13,54 | 18,91 | 0,716 | 1,938 |
| 1439 | 5,2 | 12,43 | 29,85 | 43,35 | 12,94 | 16,91 | 0,765 | 1,785 |
| 1440 | 4,9 | 19,86 | 29,36 | 42,67 | 12,53 | 16,83 | 0,744 | 1,83  |
| 1441 | 4,3 | 11    | 31,26 | 44,01 | 13,76 | 17,5  | 0,786 | 1,64  |
| 1442 | 4,7 | 21    | 32,53 | 44,85 | 14,59 | 17,94 | 0,813 | 1,682 |
| 1443 | 3,8 | 20,43 | 34,8  | 44,13 | 15,36 | 19,44 | 0,79  | 1,721 |
| 1444 | 3,7 | 12,43 | 34,21 | 43,87 | 15,01 | 19,2  | 0,781 | 1,687 |
| 1445 | 4,7 | 22    | 38,91 | 45,05 | 17,53 | 21,38 | 0,819 | 2,068 |
| 1446 | 4,4 | 12    | 37,19 | 44,04 | 16,38 | 20,81 | 0,787 | 2,009 |
| 1447 | 3,9 | 13,43 | 29,92 | 41,77 | 12,5  | 17,42 | 0,717 | 1,573 |
| 1448 | 3,9 | 21    | 31,2  | 42,59 | 13,29 | 17,91 | 0,742 | 1,616 |
| 1449 | 4,5 | 20,14 | 35,4  | 43,02 | 15,23 | 20,17 | 0,755 | 1,917 |
| 1450 | 4,6 | 12,14 | 33,9  | 42,12 | 14,28 | 19,62 | 0,727 | 1,885 |
| 1451 | 4,4 | 12,28 | 27,9  | 41,82 | 11,67 | 16,23 | 0,719 | 1,561 |

|      |     |       |       |       |       |       |       |       |
|------|-----|-------|-------|-------|-------|-------|-------|-------|
| 1452 | 5,2 | 20,28 | 29,01 | 42,6  | 12,36 | 16,65 | 0,742 | 1,615 |
| 1453 |     | 12,28 |       |       |       |       |       |       |
| 1454 | 4,5 | 11,14 | 37,41 | 43,59 | 16,31 | 21,1  | 0,772 | 2,031 |
| 1455 | 4,6 | 32    | 38,19 | 46,92 | 17,92 | 20,27 | 0,884 | 1,938 |
| 1456 | 4,2 | 13,86 | 35,06 | 43,55 | 15,27 | 19,79 | 0,771 | 1,866 |
| 1457 | 5,5 | 20    | 36,81 | 45,88 | 16,89 | 19,92 | 0,847 | 1,926 |
| 1458 | 5,2 | 19,86 | 30,88 | 42,97 | 13,27 | 17,61 | 0,753 | 1,563 |
| 1459 | 3,8 | 10,86 |       |       |       |       |       |       |
| 1460 | 3,7 | 12,28 | 31,72 | 42,93 | 13,62 | 18,1  | 0,752 | 1,64  |
| 1461 | 3,6 | 18,14 | 32,09 | 43,31 | 13,9  | 18,19 | 0,764 | 1,697 |
| 1462 | 4,9 | 12,72 | 31,43 | 42,6  | 13,39 | 18,04 | 0,742 | 1,578 |
| 1463 | 3,7 | 12,86 | 32,9  | 43,31 | 14,25 | 18,65 | 0,764 | 1,801 |
| 1464 | 4,1 | 20,14 | 33,88 | 44,51 | 15,08 | 18,8  | 0,802 | 1,795 |
| 1465 | 3,6 | 20,28 | 32,47 | 43,68 | 13,86 | 18,61 | 0,744 | 1,739 |
| 1466 | 3,5 | 11,28 | 31,68 | 42,55 | 13,48 | 18,2  | 0,74  | 1,685 |
| 1467 | 4,1 | 30,86 | 35,19 | 44,52 | 15,67 | 19,52 | 0,802 | 1,782 |
| 1468 | 4,1 | 21,14 | 34,44 | 44,04 | 15,17 | 19,27 | 0,787 | 1,728 |
| 1469 | 4,1 | 14,14 | 35,22 | 43,55 | 15,34 | 19,88 | 0,771 | 1,7   |
| 1470 |     | 28    |       |       |       |       |       |       |
| 1471 |     | 31,57 |       |       |       |       |       |       |
| 1472 |     | 40,14 |       |       |       |       |       |       |
| 1473 |     | 39,28 |       |       |       |       |       |       |
| 1474 | 4,2 | 12,14 | 33,71 | 42,71 | 14,4  | 19,31 | 0,745 | 1,762 |
| 1475 | 5,6 | 20,57 | 36,44 | 44,78 | 16,32 | 20,12 | 0,811 | 1,902 |
| 1476 | 5,6 | 13,14 | 35,19 | 44,1  | 15,52 | 19,67 | 0,789 | 1,866 |
| 1477 | 4,7 | 11,72 | 37,86 | 46,01 | 17,42 | 20,44 | 0,852 | 1,955 |
| 1478 | 4,7 | 20    | 32,08 | 45,48 | 14,59 | 17,49 | 0,834 | 1,669 |
| 1479 | 4,5 | 12,72 | 32,65 | 41,28 | 13,48 | 19,17 | 0,703 | 1,87  |
| 1480 | 4,2 | 12    | 29,99 | 43,64 | 13,09 | 16,9  | 0,774 | 1,617 |
| 1481 | 4,1 | 19,72 | 34,83 | 45,65 | 15,9  | 18,93 | 0,839 | 1,763 |
| 1482 | 3,7 | 12,72 | 33,31 | 43,96 | 14,64 | 18,67 | 0,784 | 1,732 |
| 1483 | 3,8 | 13,14 | 32,77 | 45,13 | 14,79 | 17,98 | 0,822 | 1,747 |
| 1484 | 4,1 | 20,14 | 33,32 | 45,25 | 15,08 | 18,24 | 0,826 | 1,772 |

|      |     |       |       |       |       |       |       |       |
|------|-----|-------|-------|-------|-------|-------|-------|-------|
| 1485 | 3,5 | 13    | 35,65 | 44,88 | 16    | 19,65 | 0,814 | 1,788 |
| 1486 | 4,6 | 12,28 | 30,46 | 42,28 | 12,88 | 17,58 | 0,732 | 1,549 |
| 1487 | 4,9 | 18,72 | 30,77 | 42,11 | 12,96 | 17,81 | 0,727 | 1,591 |
| 1488 | 5,2 | 12,14 | 29,41 | 41,58 | 12,23 | 17,18 | 0,711 | 1,544 |
| 1489 | 4,2 | 12,43 | 34,35 | 42,64 | 14,65 | 19,7  | 0,743 | 1,968 |
| 1490 | 3,7 | 11,57 | 31,77 | 43,68 | 13,88 | 17,89 | 0,775 | 1,619 |
| 1491 | 3,5 | 21,14 | 32,08 | 43,79 | 14,05 | 18,03 | 0,779 | 1,659 |
| 1492 | 4,6 | 12,28 | 32,86 | 44,12 | 14,5  | 18,36 | 0,789 | 1,825 |
| 1493 | 3,8 | 13    | 32,3  | 42,97 | 13,88 | 18,42 | 0,753 | 1,611 |
| 1494 | 3,5 | 20,57 | 31,31 | 41,32 | 12,94 | 18,37 | 0,704 | 1,654 |
| 1495 | 4,7 | 20,28 | 33,85 | 44,84 | 15,18 | 18,67 | 0,813 | 1,825 |
| 1496 | 4   | 10,72 | 31,04 | 43,07 | 13,37 | 17,67 | 0,756 | 1,743 |
| 1497 | 4,6 | 20,57 | 32,65 | 44,41 | 14,5  | 18,15 | 0,798 | 1,814 |
| 1498 | 3,9 | 12,43 | 30,81 | 42,74 | 13,17 | 17,64 | 0,746 | 1,673 |
| 1499 | 4,7 | 20,86 |       |       |       |       |       |       |
| 1500 | 4,9 | 13,14 | 32,88 | 43    | 14,14 | 18,74 | 0,754 | 1,824 |
| 1501 | 4,4 | 20,14 | 36,38 | 43,95 | 15,99 | 20,39 | 0,784 | 1,815 |
| 1502 | 4,4 | 20,57 | 34,06 | 43,95 | 14,97 | 19,09 | 0,784 | 1,873 |
| 1503 | 5,5 | 21,28 | 38,23 | 44,02 | 16,83 | 21,4  | 0,786 | 1,938 |
| 1504 | 3,5 | 12    | 30,38 | 43,18 | 13,12 | 17,26 | 0,76  | 1,563 |
| 1505 | 4,6 | 12,28 | 38,01 | 43,04 | 16,36 | 21,65 | 0,755 | 1,912 |
| 1506 | 4   | 12,28 | 28,99 | 41,73 | 12,1  | 16,89 | 0,716 | 1,62  |
| 1507 | 4,2 | 21,28 | 29,82 | 42,28 | 12,61 | 17,21 | 0,732 | 1,648 |
| 1508 | 4,1 | 13,57 | 30,98 | 41,28 | 12,79 | 18,19 | 0,703 | 1,677 |
| 1509 | 4,5 | 20,14 |       |       |       |       |       |       |
| 1510 | 4,2 | 12,14 | 36,8  | 44,61 | 16,42 | 20,38 | 0,805 | 1,807 |
| 1511 | 4,2 | 11,14 | 34,06 | 41,77 | 14,23 | 19,83 | 0,717 | 1,794 |
| 1512 | 4,6 | 20,57 | 30,71 | 41,22 | 12,66 | 18,05 | 0,701 | 1,69  |
| 1513 | 4,2 | 11,43 | 36,24 | 42,52 | 15,41 | 20,83 | 0,739 | 1,956 |
| 1514 | 3,9 | 20    | 31,9  | 41,37 | 13,2  | 18,7  | 0,705 | 1,731 |
| 1515 | 4,1 | 11,86 | 30,99 | 40,36 | 12,51 | 18,48 | 0,676 | 1,688 |
| 1516 | 4,4 | 12    | 33,11 | 42,94 | 14,22 | 18,89 | 0,752 | 1,85  |
| 1517 | 4,3 | 21,43 | 39,34 | 43,95 | 17,29 | 22,05 | 0,784 | 2,019 |

|      |     |       |       |       |       |       |       |       |
|------|-----|-------|-------|-------|-------|-------|-------|-------|
| 1518 | 4,6 | 21    | 32,48 | 42,98 | 13,96 | 18,52 | 0,753 | 1,826 |
| 1519 | 4,2 | 12,57 | 36,41 | 42,84 | 15,6  | 20,81 | 0,749 | 1,852 |
| 1520 | 3,5 | 11,86 | 33,14 | 42,15 | 13,97 | 19,17 | 0,728 | 1,712 |
| 1521 | 4,1 | 18,86 | 34,68 | 43,88 | 15,22 | 19,46 | 0,782 | 1,76  |
| 1522 | 3,5 | 12,28 | 39,97 | 45,15 | 18,05 | 21,92 | 0,823 | 1,997 |
| 1523 | 4,4 | 20    | 33,57 | 41,34 | 13,88 | 19,69 | 0,704 | 1,732 |
| 1524 | 3,6 | 12    | 32,94 | 42,1  | 13,87 | 19,07 | 0,727 | 1,673 |
| 1525 | 3,6 | 11    | 29,39 | 42,32 | 12,44 | 16,95 | 0,733 | 1,563 |
| 1526 | 4,1 | 19,72 | 31,78 | 43,54 | 13,84 | 17,94 | 0,771 | 1,712 |
| 1527 | 5,4 | 19    | 30,09 | 42,77 | 12,85 | 17,24 | 0,745 | 1,606 |
| 1528 | 4,2 | 11,72 | 30,71 | 41,97 | 12,89 | 17,82 | 0,723 | 1,738 |
| 1529 | 4,1 | 11,43 | 34,99 | 44,01 | 15,4  | 19,59 | 0,786 | 1,669 |
| 1530 |     | 20,43 | 36,97 | 45,14 | 16,69 | 20,28 | 0,822 | 1,712 |
| 1531 | 5,2 | 19,72 | 26,69 | 42,2  | 12,53 | 17,16 | 0,73  | 1,581 |
| 1532 | 4,7 | 19,57 | 34,32 | 45,51 | 15,62 | 18,7  | 0,835 | 1,754 |
| 1533 | 4,5 | 12,57 | 33,52 | 45,22 | 15,16 | 18,36 | 0,825 | 1,728 |
| 1534 | 4,1 | 12,14 | 30,35 | 40,82 | 12,39 | 17,96 | 0,689 | 1,64  |
| 1535 | 4,7 | 20,14 | 32,15 | 41,74 | 13,42 | 18,73 | 0,716 | 1,654 |
| 1536 | 4,6 | 12,43 | 37,35 | 42,67 | 15,94 | 21,41 | 0,744 | 2,116 |
| 1537 | 4,1 | 19,57 | 34,47 | 43,48 | 14,99 | 19,48 | 0,769 | 1,841 |
| 1538 | 4,8 | 10    | 33,84 | 43,2  | 14,62 | 19,22 | 0,76  | 1,818 |
| 1539 | 3,7 | 19,57 | 32,17 | 43,54 | 14,01 | 18,16 | 0,771 | 1,669 |
| 1540 | 5,2 | 11,28 | 35,14 | 42,11 | 14,8  | 20,34 | 0,727 | 1,965 |
| 1541 | 4,9 | 20,28 | 36,53 | 43,2  | 15,78 | 20,74 | 0,76  | 2,026 |
| 1542 | 3,2 |       | 30,14 | 41,77 | 12,59 | 17,55 | 0,717 | 1,611 |
| 1543 | 4,7 | 22    | 38,65 | 42,92 | 16,59 | 22,06 | 0,752 | 2,149 |
| 1544 | 4,9 | 20    | 28,65 | 41,01 | 11,75 | 16,9  | 0,695 | 1,624 |
| 1545 | 4,1 | 13,14 | 31,29 | 42,79 | 13,39 | 17,9  | 0,748 | 1,635 |
| 1546 | 4,6 | 12    | 26,85 | 39,36 | 10,57 | 16,28 | 0,649 | 1,59  |
| 1547 | 4,1 | 20    | 28,84 | 41,99 | 12,11 | 16,73 | 0,723 | 1,539 |
| 1548 | 4,5 | 12,28 | 28,08 | 40,7  | 11,43 | 16,65 | 0,686 | 1,567 |
| 1549 | 4   | 11,28 | 34,66 | 42    | 14,56 | 20,1  | 0,724 | 1,796 |
| 1550 | 3,6 | 19,86 | 33,02 | 42,15 | 13,92 | 19,1  | 0,728 | 1,728 |



|      |     |       |       |       |       |       |       |       |
|------|-----|-------|-------|-------|-------|-------|-------|-------|
| 1551 | 3,6 | 11,86 | 33,31 | 41,81 | 13,93 | 19,38 | 0,718 | 1,687 |
| 1552 | 4,1 | 13    | 34,21 | 41,82 | 14,31 | 19,9  | 0,719 | 1,768 |
| 1553 | 4,4 | 20    | 36,64 | 43,28 | 15,86 | 20,78 | 0,763 | 1,796 |
| 1554 | 4,5 | 11,57 | 36,43 | 45,92 | 16,73 | 19,7  | 0,849 | 1,825 |
| 1555 | 4,9 | 19,57 | 36,62 | 45,49 | 16,66 | 19,96 | 0,834 | 1,861 |
| 1556 | 3,9 | 11,86 | 32,18 | 41,79 | 13,45 | 18,73 | 0,718 | 1,721 |
| 1557 | 4,2 | 19,86 | 33,57 | 43,13 | 14,48 | 19,09 | 0,758 | 1,741 |
| 1558 | 4   | 12,28 | 31,78 | 41,59 | 13,22 | 18,56 | 0,712 | 1,725 |
| 1559 | 4,4 | 20,43 | 33,59 | 41,7  | 14,01 | 19,58 | 0,715 | 1,775 |
| 1560 | 3,6 | 21    | 34,88 | 44,35 | 15,47 | 19,41 | 0,797 | 1,861 |
| 1561 | 3,9 | 13,14 | 29,33 | 41,11 | 12,06 | 17,27 | 0,698 | 1,572 |
| 1562 | 4   | 20,86 | 35,22 | 44    | 15,5  | 19,72 | 0,786 | 1,791 |
| 1563 | 3,3 | 12,28 | 34,73 | 43,88 | 15,24 | 19,49 | 0,781 | 1,724 |
| 1564 | 4   | 19,14 | 30,87 | 42,3  | 13,06 | 17,81 | 0,733 | 1,587 |
| 1565 | 3,5 | 20,57 | 39,05 | 44,12 | 17,23 | 21,82 | 0,789 | 1,899 |
| 1566 | 3,5 | 11,72 | 37,56 | 44,19 | 16,6  | 20,96 | 0,791 | 1,833 |
| 1567 | 3,2 | 22    | 39,61 | 46,45 | 18,4  | 21,21 | 0,867 | 1,956 |
| 1568 | 3   | 12,43 | 37,72 | 46,07 | 17,38 | 20,34 | 0,854 | 1,845 |
| 1569 | 2,8 | 12,43 | 32,88 | 42,18 | 13,87 | 19,01 | 0,729 | 1,741 |
| 1570 | 4,3 | 14    | 30,23 | 40,72 | 12,31 | 17,92 | 0,686 | 1,751 |
| 1571 | 4   | 11,57 | 36,46 | 44,37 | 16,18 | 20,28 | 0,797 | 1,778 |
| 1572 | 4,1 | 21    | 32,41 | 42,73 | 13,85 | 18,56 | 0,746 | 1,668 |
| 1573 | 4,7 | 12,28 | 32,7  | 42,93 | 14,04 | 18,66 | 0,752 | 1,688 |
| 1574 | 4,8 | 20,57 | 31,04 | 41,55 | 12,9  | 18,14 | 0,711 | 1,776 |
| 1575 | 3,5 | 10    | 32,9  | 43,19 | 14,21 | 18,69 | 0,76  | 1,64  |
| 1576 | 4,2 | 19,57 | 34,58 | 43,2  | 14,94 | 19,64 | 0,76  | 1,818 |
| 1577 | 5,2 | 20,28 | 33,12 | 43,84 | 14,52 | 18,6  | 0,78  | 1,741 |
| 1578 | 3,7 | 21,14 | 39,95 | 44,6  | 17,82 | 22,13 | 0,805 | 1,918 |
| 1579 | 3,7 | 13,14 | 38,28 | 42,58 | 16,3  | 21,98 | 0,741 | 2,109 |
| 1580 | 4,6 | 20,43 | 38,94 | 43,47 | 16,93 | 22,01 | 0,769 | 2,151 |
| 1581 | 4,6 | 12,72 | 39,08 | 43,42 | 16,97 | 22,11 | 0,767 | 2,173 |
| 1582 | 3,7 | 20,28 | 37,02 | 45,62 | 16,89 | 20,13 | 0,839 | 1,895 |
| 1583 | 3,8 | 20,57 | 33,65 | 42,97 | 14,46 | 19,19 | 0,753 | 1,724 |

|      |     |       |       |       |       |       |       |       |
|------|-----|-------|-------|-------|-------|-------|-------|-------|
| 1584 | 4,1 | 11,57 | 33,35 | 42,81 | 14,28 | 19,07 | 0,748 | 1,683 |
| 1585 | 3,7 | 20,28 | 34,01 | 45,95 | 15,63 | 18,38 | 0,85  | 1,675 |
| 1586 | 3,8 | 13,57 | 36,73 | 45,65 | 16,77 | 19,96 | 0,84  | 1,833 |
| 1587 | 3,3 | 12,57 | 32,89 | 45,75 | 15,05 | 17,84 | 0,843 | 1,567 |
| 1588 | 5,5 | 11,86 | 30,45 | 42,69 | 13    | 17,45 | 0,744 | 1,656 |
| 1589 | 4,1 | 19,86 | 30,68 | 42,5  | 13,04 | 17,64 | 0,739 | 1,694 |
| 1590 | 3,7 | 12,72 | 34,22 | 40,38 | 13,82 | 20,4  | 0,677 | 1,769 |
| 1591 | 4,1 | 20,14 | 36,43 | 41,88 | 15,26 | 21,17 | 0,72  | 1,852 |
| 1592 | 4,7 | 12,28 | 37,13 | 44,54 | 16,54 | 20,59 | 0,803 | 1,82  |
| 1593 | 4,8 | 20,14 | 37,82 | 44,71 | 16,91 | 20,91 | 0,808 | 1,87  |
| 1594 | 3,9 | 12,28 | 29,64 | 41,9  | 12,42 | 17,22 | 0,721 | 1,563 |
| 1595 | 5   | 20,28 | 31,22 | 42,79 | 13,36 | 17,86 | 0,748 | 1,605 |
| 1596 | 3,3 | 12    | 30,55 | 40,52 | 12,38 | 18,17 | 0,681 | 1,738 |
| 1597 | 4,3 | 19,86 | 34,56 | 42,7  | 14,76 | 19,8  | 0,745 | 1,991 |
| 1598 | 4   | 14,28 | 28,24 | 42,17 | 11,91 | 16,33 | 0,729 | 1,51  |
| 1599 | 4,5 | 11,72 | 32,35 | 41,05 | 13,28 | 19,07 | 0,696 | 1,644 |
| 1600 | 4,3 | 20,72 | 33,26 | 42,63 | 14,18 | 19,08 | 0,743 | 1,712 |
| 1601 | 4,8 | 20,14 | 34,18 | 42,94 | 14,68 | 19,5  | 0,753 | 1,812 |
| 1602 | 3,6 | 10,72 | 32,68 | 42,59 | 13,92 | 18,76 | 0,742 | 1,706 |
| 1603 | 4,3 | 19,72 | 27,83 | 41,75 | 11,62 | 16,21 | 0,716 | 1,539 |
| 1604 | 3,9 | 12,43 | 44,06 | 45,77 | 20,17 | 23,89 | 0,844 | 2,374 |
| 1605 | 3,2 | 12,57 | 36,74 | 43,08 | 15,83 | 20,91 | 0,757 | 2,045 |
| 1606 | 4   | 20,86 | 36,61 | 44,08 | 16,14 | 20,47 | 0,788 | 1,973 |
| 1607 | 5,6 | 20,14 | 38,28 | 43,67 | 16,72 | 21,56 | 0,775 | 2,155 |
| 1608 | 4,3 | 20,14 | 36,95 | 44,49 | 16,44 | 20,51 | 0,801 | 2,067 |
| 1609 | 3,3 | 20,43 | 35,34 | 44,28 | 15,65 | 19,69 | 0,794 | 1,683 |
| 1610 | 4,1 | 20,72 | 35,95 | 44,81 | 16,11 | 19,84 | 0,811 | 1,837 |
| 1611 | 4,2 | 12,72 | 36,02 | 44,69 | 16,1  | 19,92 | 0,808 | 1,812 |
| 1612 | 4,3 | 20,43 | 30,33 | 42,99 | 13,04 | 17,29 | 0,754 | 1,714 |
| 1613 | 3,6 | 12,86 | 37    | 44,4  | 16,43 | 20,57 | 0,798 | 1,979 |
| 1614 | 2,9 | 12,57 | 34,87 | 44,04 | 15,36 | 19,51 | 0,787 | 1,654 |
| 1615 | 4,8 | 13,57 | 38,66 | 43,35 | 16,76 | 21,9  | 0,765 | 2,155 |
| 1616 | 4,1 | 11,72 | 29,4  | 42,44 | 12,48 | 16,92 | 0,737 | 1,675 |

|      |     |       |       |       |       |       |       |       |
|------|-----|-------|-------|-------|-------|-------|-------|-------|
| 1617 | 4,3 | 12,28 | 32,9  | 43,67 | 14,37 | 18,53 | 0,775 | 1,615 |
| 1618 | 4,8 | 22,28 | 32,83 | 43,74 | 14,36 | 18,47 | 0,777 | 1,688 |
| 1619 | 3,7 | 22    | 33,33 | 42,3  | 14,1  | 19,23 | 0,733 | 1,805 |
| 1620 | 3,4 | 13,14 | 32,17 | 42,05 | 13,53 | 18,64 | 0,725 | 1,738 |
| 1621 | 3,7 | 11,72 | 36,79 | 45,01 | 16,56 | 20,23 | 0,818 | 1,95  |
| 1622 | 4,1 | 20,28 | 36,97 | 45,79 | 16,93 | 20,04 | 0,844 | 1,996 |
| 1623 | 4   | 12,28 | 35,66 | 44,61 | 15,91 | 19,75 | 0,805 | 1,858 |
| 1624 | 3,9 | 12,28 | 29,06 | 40,98 | 11,91 | 17,15 | 0,694 | 1,567 |
| 1625 | 4,5 | 21,72 | 37,46 | 44,95 | 16,84 | 20,62 | 0,816 | 1,883 |
| 1626 | 4,2 | 20,86 | 32,81 | 41,84 | 13,73 | 19,08 | 0,719 | 1,802 |
| 1627 | 3,8 | 11,86 | 31,46 | 43,48 | 13,68 | 17,78 | 0,769 | 1,665 |
| 1628 | 4,4 | 11,86 | 33,06 | 42,8  | 14,15 | 18,91 | 0,748 | 1,789 |
| 1629 | 4,4 | 21,14 | 30,63 | 42,47 | 13,01 | 17,62 | 0,738 | 1,646 |
| 1630 | 4,4 | 13,14 | 30,48 | 42,65 | 13    | 17,48 | 0,743 | 1,619 |
| 1631 | 3,7 | 11,57 | 34,86 | 44,14 | 15,39 | 19,47 | 0,79  | 1,823 |
| 1632 | 4,3 | 20,28 | 32,2  | 40,71 | 13,11 | 19,09 | 0,686 | 1,836 |
| 1633 | 4,1 | 12,28 | 31,26 | 39,79 | 12,44 | 18,82 | 0,66  | 1,823 |
| 1634 | 3,9 | 19,86 | 31,57 | 41,74 | 13,18 | 18,39 | 0,716 | 1,645 |
| 1635 | 4,3 | 20,57 | 38,9  | 45,98 | 17,89 | 21,01 | 0,851 | 1,924 |
| 1636 | 3,6 | 11,86 | 30,78 | 41,09 | 12,65 | 18,13 | 0,697 | 1,616 |
| 1637 | 4   | 12,57 | 28,36 | 40,55 | 11,5  | 16,86 | 0,682 | 1,557 |
| 1638 | 5,1 | 12    | 33,15 | 44,52 | 14,76 | 18,39 | 0,802 | 1,772 |
| 1639 | 5,3 | 22    | 33,1  | 44,22 | 14,64 | 18,46 | 0,793 | 1,844 |
| 1640 | 4,8 | 12,57 | 29,95 | 41,13 | 12,32 | 17,63 | 0,698 | 1,663 |
| 1641 | 4,2 | 12,15 | 34,16 | 44,43 | 15,18 | 18,98 | 0,799 | 1,726 |
| 1642 | 4,8 | 19,57 | 31,93 | 42,87 | 13,69 | 18,24 | 0,75  | 1,69  |
| 1643 | 4,4 | 20,43 | 33,4  | 44,67 | 14,92 | 18,48 | 0,807 | 1,838 |
| 1644 | 4,4 | 20,72 | 37,19 | 44,44 | 16,53 | 20,66 | 0,8   | 2,002 |
| 1645 | 3,9 | 12,57 | 36,12 | 43,79 | 15,82 | 20,3  | 0,779 | 2,002 |
| 1646 | 4,2 | 12,57 | 32,75 | 44,94 | 14,72 | 18,03 | 0,816 | 1,802 |
| 1647 | 4,5 | 20,14 | 33,3  | 44,47 | 14,81 | 18,49 | 0,8   | 1,826 |
| 1648 | 3,9 | 12,14 | 31,62 | 43,95 | 13,9  | 17,72 | 0,784 | 1,727 |
| 1649 | 4,9 | 21,72 | 30,13 | 43,31 | 13,05 | 17,08 | 0,764 | 1,672 |

|      |     |       |       |       |       |       |       |       |
|------|-----|-------|-------|-------|-------|-------|-------|-------|
| 1650 | 4,8 | 12,28 | 28,27 | 42,02 | 11,88 | 16,69 | 0,724 | 1,607 |
| 1651 | 3,7 | 19,72 | 34,8  | 42,35 | 14,74 | 20,06 | 0,734 | 1,872 |
| 1652 | 4,3 | 11,86 | 34,24 | 41,85 | 14,33 | 19,91 | 0,719 | 1,834 |
| 1653 | 3,8 | 20,28 | 41,48 | 43,82 | 18,18 | 23,3  | 0,78  | 2,236 |
| 1654 | 4,4 | 20    | 35,22 | 42,75 | 15,06 | 20,16 | 0,747 | 1,815 |
| 1655 | 5   | 20,28 | 34,47 | 42,64 | 14,7  | 19,77 | 0,743 | 1,932 |
| 1656 | 4,7 | 13,57 | 36    | 42,72 | 15,38 | 20,62 | 0,745 | 1,865 |
| 1657 | 3,7 | 11,86 | 36,64 | 43,8  | 16,05 | 20,59 | 0,779 | 1,802 |
| 1658 | 3,8 | 12,28 | 33,77 | 42,4  | 14,32 | 19,45 | 0,736 | 1,925 |
| 1659 | 4,8 | 19,57 | 35,4  | 42,51 | 15,05 | 20,35 | 0,739 | 1,878 |
| 1660 | 3,6 | 12,28 | 41,32 | 44,04 | 18,2  | 23,12 | 0,787 | 2,218 |
| 1661 | 3,9 | 12,86 | 35,02 | 43,91 | 15,38 | 19,64 | 0,783 | 1,914 |
| 1662 | 4   | 11,57 | 37,77 | 44,55 | 16,83 | 20,94 | 0,803 | 1,886 |
| 1663 | 4,7 | 19,28 | 37,74 | 44,35 | 16,74 | 21    | 0,797 | 1,927 |
| 1664 | 5,4 | 19,86 | 37,78 | 42    | 15,87 | 21,91 | 0,724 | 2,129 |
| 1665 | 4,8 | 11,86 | 37,51 | 41,77 | 15,67 | 21,84 | 0,717 | 2,14  |
| 1666 | 4,9 | 20,14 | 39,85 | 46,19 | 18,41 | 21,44 | 0,858 | 1,965 |
| 1667 | 3,4 | 12,14 | 37,89 | 44,44 | 16,84 | 21,05 | 0,8   | 1,889 |
| 1668 | 3,3 | 12,86 | 34,48 | 42,48 | 14,65 | 19,83 | 0,738 | 1,806 |
| 1669 | 3,6 | 19,72 | 35,65 | 43,14 | 15,38 | 20,27 | 0,758 | 1,833 |
| 1670 | 3,3 | 11,72 | 35,94 | 44,07 | 15,84 | 20,1  | 0,788 | 1,702 |
| 1671 | 3,2 | 21,72 | 36,07 | 43,85 | 15,82 | 20,25 | 0,781 | 1,758 |
| 1672 | 3,8 | 20,14 | 30,05 | 42,32 | 12,72 | 17,33 | 0,733 | 1,659 |
| 1673 | 3,7 | 11,72 | 30,24 | 41,83 | 12,65 | 17,59 | 0,719 | 1,646 |
| 1674 | 4,6 | 13,14 | 34,74 | 42,51 | 14,77 | 19,97 | 0,739 | 2,052 |
| 1675 | 5   | 21,14 | 38,86 | 45,05 | 17,51 | 21,35 | 0,82  | 2,095 |
| 1676 | 4,3 | 12,14 | 31,14 | 39,65 | 12,35 | 18,79 | 0,657 | 1,794 |
| 1677 | 4,5 | 12,57 | 32,69 | 42,7  | 13,96 | 18,73 | 0,745 | 1,754 |
| 1678 | 5   | 20,57 | 33,35 | 43,17 | 14,4  | 18,95 | 0,759 | 1,794 |
| 1679 | 4,3 | 12,14 | 37,54 | 44,45 | 16,69 | 20,85 | 0,8   | 2,048 |
| 1680 | 4,4 | 20    | 38,11 | 44,71 | 17,04 | 21,07 | 0,808 | 2,059 |
| 1681 | 4,2 | 20    | 29,65 | 43,6  | 12,93 | 16,72 | 0,773 | 1,481 |
| 1682 | 3,8 | 12,43 | 29,86 | 43,7  | 13,05 | 16,81 | 0,776 | 1,466 |

|      |     |       |       |       |       |       |       |       |  |
|------|-----|-------|-------|-------|-------|-------|-------|-------|--|
| 1683 | 4,7 | 21,28 |       |       |       |       |       |       |  |
| 1684 | 4,8 | 12,86 | 29,83 | 41,43 | 12,36 | 17,47 | 0,707 | 1,646 |  |
| 1685 | 4,6 | 11,72 | 32,52 | 42,8  | 13,92 | 18,6  | 0,748 | 1,862 |  |
| 1686 | 4,9 | 19,72 | 36,47 | 44,03 | 16,06 | 20,41 | 0,786 | 1,926 |  |
| 1687 | 4,8 | 19,28 | 31,37 | 43,22 | 13,56 | 17,81 | 0,761 | 1,634 |  |
| 1688 | 4,1 | 12,72 | 31,97 | 43,44 | 13,89 | 18,08 | 0,768 | 1,625 |  |
| 1689 | 5   | 22,14 | 36    | 42,61 | 15,34 | 20,66 | 0,742 | 2,149 |  |
| 1690 | 4,4 | 12,14 | 34,87 | 41,12 | 14,34 | 20,53 | 0,698 | 2,138 |  |
| 1691 | 4,2 | 9,28  | 30,94 | 41,43 | 12,82 | 18,12 | 0,707 | 1,788 |  |
| 1692 | 5   | 20,28 | 29,75 | 40,13 | 11,94 | 17,81 | 0,67  | 1,795 |  |
| 1693 | 5,9 | 21,57 | 34,68 | 44,78 | 15,53 | 19,15 | 0,81  | 1,872 |  |
| 1694 | 4,7 | 12,72 | 34,36 | 45,6  | 15,67 | 18,69 | 0,838 | 1,836 |  |
| 1695 | 4,7 | 19,57 | 37,33 | 45,51 | 16,99 | 20,34 | 0,835 | 1,802 |  |
| 1696 | 4,6 | 13,14 | 36,2  | 44,3  | 16,04 | 20,16 | 0,795 | 1,749 |  |
| 1697 | 4   | 12    | 40,08 | 46,15 | 18,5  | 21,58 | 0,857 | 2,076 |  |
| 1698 | 4,3 | 20,28 | 33,62 | 44,22 | 14,87 | 18,75 | 0,793 | 1,714 |  |
| 1699 | 3,9 | 12,57 | 32,26 | 42,8  | 13,81 | 18,45 | 0,748 | 1,673 |  |
| 1700 | 2,7 | 26,14 | 35,19 | 44,67 | 15,72 | 19,47 | 0,807 | 1,818 |  |
| 1701 | 3   | 21,43 |       |       |       |       |       |       |  |
| 1702 | 3,4 | 32,86 | 36,49 | 45,73 | 16,69 | 19,8  | 0,842 | 1,837 |  |
| 1703 | 4,3 | 26,43 |       |       |       |       |       |       |  |
| 1704 | 4,1 | 30,86 | 54,12 | 53,82 | 29,13 | 24,99 | 1,165 | 2,33  |  |
| 1705 | 4,3 | 22,86 | 37,49 | 44,27 | 16,6  | 20,89 | 0,794 | 2,032 |  |
| 1706 | 3,3 | 21,28 | 35,27 | 44,34 | 15,64 | 19,63 | 0,796 | 1,78  |  |
| 1707 | 3,4 | 27,57 | 41,47 | 46,05 | 19,1  | 22,37 | 0,853 | 1,972 |  |
| 1708 | 2,7 | 29,43 | 40,27 | 46,61 | 18,77 | 21,5  | 0,873 | 1,967 |  |
| 1709 | 3,8 | 31,14 | 44,04 | 52,24 | 23,01 | 21,03 | 1,094 | 2,048 |  |
| 1710 | 4,4 | 31,28 |       |       |       |       |       |       |  |
| 1711 | 3,7 | 20,86 | 37,88 | 43,5  | 16,48 | 21,4  | 0,77  |       |  |
| 1712 | 3,4 | 26,72 | 39,23 | 45,75 | 17,95 | 21,28 | 0,843 | 2,002 |  |
| 1713 | 4,7 | 26,57 |       |       |       |       |       |       |  |
| 1714 | 2,4 | 29,72 |       |       |       |       |       |       |  |
| 1715 | 3,2 | 26,57 | 50,48 | 51,28 | 25,89 | 24,59 | 1,052 | 2,114 |  |

|      |     |       |       |       |       |       |       |       |
|------|-----|-------|-------|-------|-------|-------|-------|-------|
| 1716 | 3,9 | 27,28 | 47,23 | 49,05 | 23,17 | 24,06 | 0,963 | 2,176 |
| 1717 | 3,1 | 31,14 |       |       |       |       |       |       |
| 1718 | 4,2 | 31    |       |       |       |       |       |       |
| 1719 | 3,2 | 30,43 | 37,44 | 46,98 | 17,59 | 19,85 | 0,886 | 1,872 |
| 1720 | 3,1 | 31    |       |       |       |       |       |       |
| 1721 | 4,4 | 32,86 |       |       |       |       |       |       |
| 1722 | 5   | 30,14 | 39,84 | 47,84 | 19,06 | 20,78 | 0,917 | 1,899 |
| 1723 | 5   | 29,72 | 28,95 | 42,9  | 12,42 | 16,53 | 0,751 | 1,663 |
| 1724 | 4,7 | 25,14 | 49,92 | 46,29 | 23,11 | 26,81 | 0,86  |       |
| 1725 | 2   | 29,57 |       |       |       |       |       |       |
| 1726 | 4,8 | 30,43 | 37,85 | 46,28 | 17,52 | 20,33 | 0,861 | 1,907 |
| 1727 | 2,5 | 31,57 |       |       |       |       |       |       |
| 1728 | 3   | 31,72 | 47,34 | 45,24 | 21,42 | 25,92 | 0,826 | 2,154 |
| 1729 | 2,8 | 28,28 | 44,24 | 50,18 | 22,2  | 22,04 | 1,007 | 2,014 |
| 1730 | 2,9 | 31,28 |       |       |       |       |       |       |
| 1731 | 3,9 | 25,57 |       |       |       |       |       |       |
| 1732 | 3,8 | 29,86 | 43,02 | 48,83 | 21,01 | 22,01 | 0,954 | 1,877 |
| 1733 | 3,5 | 22,86 | 39,09 | 45,91 | 17,95 | 21,14 | 0,849 | 1,865 |
| 1734 | 2,9 | 32,57 |       |       |       |       |       |       |
| 1735 |     | 12,72 |       |       |       |       |       |       |
| 1736 | 2,8 | 27,57 | 35,55 | 46,01 | 16,36 | 19,19 | 0,852 | 1,819 |
| 1737 | 4,2 | 30,57 | 38,54 | 45,45 | 17,52 | 21,02 | 0,833 | 2,072 |
| 1738 | 4,3 | 20,28 | 34,62 | 42,83 | 14,83 | 19,79 | 0,749 | 1,979 |
| 1739 | 4,6 | 13,28 | 35,13 | 42,89 | 15,07 | 20,06 | 0,751 | 1,955 |
| 1740 | 4,4 | 28,57 | 43,85 | 46,33 | 20,32 | 23,53 | 0,863 | 2,157 |
| 1741 | 3,9 | 20    | 40,94 | 43,62 | 17,86 | 23,08 | 0,77  |       |
| 1742 | 3,5 | 13    | 38,72 | 43,2  | 16,73 | 21,99 | 0,76  |       |
| 1743 | 3,8 | 34,28 |       |       |       |       |       |       |
| 1744 | 5,9 | 32,72 | 67,23 | 55,89 | 37,58 | 29,65 | 1,267 | 2,915 |
| 1745 | 3,4 | 26,57 | 40,43 | 50,11 | 20,26 | 20,17 | 1,004 | 1,967 |
| 1746 | 3,8 | 12,28 | 35,79 | 43,72 | 15,65 | 20,14 | 0,777 | 1,854 |
| 1747 | 3,4 | 26,57 | 35,18 | 42,63 | 15    | 20,18 | 0,743 | 1,93  |
| 1748 | 3,2 | 32,86 |       |       |       |       |       |       |

|      |     |       |       |       |       |       |       |       |  |
|------|-----|-------|-------|-------|-------|-------|-------|-------|--|
| 1749 | 3,4 | 28,57 |       |       |       |       |       |       |  |
| 1750 | 3,1 | 32,72 |       |       |       |       |       |       |  |
| 1751 | 3,9 | 20,86 | 34,46 | 44,57 | 15,36 | 19,1  | 0,804 | 1,834 |  |
| 1752 | 3,5 | 12,86 | 33,92 | 44,51 | 15,1  | 18,82 | 0,802 | 1,77  |  |
| 1753 |     | 10,72 |       |       |       |       |       |       |  |
| 1754 | 3,1 | 26    |       |       |       |       |       |       |  |
| 1755 | 3,7 | 14,57 |       |       |       |       |       |       |  |
| 1756 | 3,4 | 13,28 | 37,6  | 43,72 | 16,44 | 21,16 | 0,78  |       |  |
| 1757 | 3,5 | 21,28 | 42,93 | 44,37 | 19,05 | 23,88 | 0,8   |       |  |
| 1758 |     | 32,57 |       |       |       |       |       |       |  |
| 1759 |     | 26,57 |       |       |       |       |       |       |  |
| 1760 |     | 24,14 |       |       |       |       |       |       |  |
| 1761 |     | 31,72 |       |       |       |       |       |       |  |
| 1762 |     | 33,28 |       |       |       |       |       |       |  |
| 1763 |     | 32,57 |       |       |       |       |       |       |  |
| 1764 |     | 26,14 |       |       |       |       |       |       |  |
| 1765 |     | 31,72 |       |       |       |       |       |       |  |
| 1766 |     | 32,72 |       |       |       |       |       |       |  |
| 1767 |     | 30,43 |       |       |       |       |       |       |  |
| 1768 |     | 31,28 |       |       |       |       |       |       |  |
| 1769 |     | 33,14 |       |       |       |       |       |       |  |
| 1770 |     | 32,86 |       |       |       |       |       |       |  |
| 1771 |     | 33,57 |       |       |       |       |       |       |  |
| 1772 |     | 25,28 |       |       |       |       |       |       |  |
| 1773 |     | 31,28 |       |       |       |       |       |       |  |
| 1774 |     | 27,57 |       |       |       |       |       |       |  |
| 1775 |     | 27,28 |       |       |       |       |       |       |  |
| 1776 |     | 32,14 |       |       |       |       |       |       |  |
| 1777 |     | 32,86 |       |       |       |       |       |       |  |
| 1778 |     | 27,28 |       |       |       |       |       |       |  |
| 1779 |     | 22,14 |       |       |       |       |       |       |  |
| 1780 |     | 33,57 |       |       |       |       |       |       |  |
| 1781 |     | 32,28 |       |       |       |       |       |       |  |

|      |     |       |       |       |       |       |       |       |
|------|-----|-------|-------|-------|-------|-------|-------|-------|
| 1782 |     | 31,14 |       |       |       |       |       |       |
| 1783 |     | 26,72 |       |       |       |       |       |       |
| 1784 |     | 30,28 |       |       |       |       |       |       |
| 1785 | 4,2 | 13,43 | 33,63 | 43,02 | 14,47 | 19,16 | 0,755 | 1,96  |
| 1786 | 4,2 | 20,86 | 36,37 | 44,59 | 16,22 | 20,15 | 0,804 | 1,993 |
| 1787 | 4   | 34,28 | 35,23 | 44,05 | 15,52 | 19,71 | 0,787 | 1,774 |
| 1788 | 3,2 | 37,86 | 41,85 | 48,98 | 20,5  | 21,35 | 0,96  | 2,058 |
| 1789 | 2,9 | 33,28 | 36,15 | 45,72 | 16,53 | 19,62 | 0,842 | 1,792 |
| 1790 | 3,6 | 35,14 | 39,16 | 44,15 | 17,29 | 21,87 | 0,79  | 1,81  |
| 1791 | 3,6 | 36,28 |       |       |       |       |       |       |
| 1792 | 3   | 38,57 | 33,09 | 43,78 | 14,49 | 18,6  | 0,779 | 1,756 |
| 1793 | 3,3 | 39,14 | 41,29 | 47,51 | 19,62 | 21,67 | 0,905 | 1,95  |
| 1794 | 3,5 | 34,43 | 38,99 | 46,49 | 18,13 | 20,86 | 0,869 | 1,902 |
| 1795 | 3,7 | 34,43 | 38,68 | 47,31 | 18,3  | 20,38 | 0,897 | 1,874 |
| 1796 | 4,2 | 39,43 |       |       |       |       |       |       |
| 1797 | 3,6 | 34    | 33,73 | 45,24 | 15,26 | 18,47 | 0,826 | 1,754 |
| 1798 | 3,1 | 36,72 | 35,66 | 46,71 | 16,66 | 19    | 0,876 | 1,649 |
| 1799 | 2,9 | 36    |       |       |       |       |       |       |
| 1800 | 3,8 | 39,43 | 36,52 | 44,93 | 16,41 | 20,11 | 0,816 | 1,709 |
| 1801 | 4,9 | 38    | 43,09 | 48,59 | 20,94 | 22,15 | 0,945 | 2,047 |
| 1802 | 3,3 | 32,43 | 34,7  | 47,49 | 16,48 | 18,22 | 0,904 | 1,76  |
| 1803 | 4,2 | 35    |       |       |       |       |       |       |
| 1804 | 3,8 | 39,28 | 38,48 | 46,98 | 18,08 | 20,4  | 0,886 | 1,856 |
| 1805 | 4,1 | 33,72 |       |       |       |       |       |       |
| 1806 | 3,1 | 37,28 | 43,06 | 48,65 | 20,95 | 22,11 | 0,947 | 1,979 |
| 1807 | 4,3 | 37    |       |       |       |       |       |       |
| 1808 | 3,8 | 37,86 | 44,32 | 54,98 | 24,37 | 19,95 | 1,221 | 1,872 |
| 1809 | 5,1 | 35,43 |       |       |       |       |       |       |
| 1810 | 3,6 | 39,72 | 41,7  | 50    | 20,85 | 20,85 | 1     | 1,789 |
| 1811 | 3,8 | 37,72 | 36,06 | 45,17 | 16,29 | 19,77 | 0,823 | 1,842 |
| 1812 | 5,3 | 29    |       |       |       |       |       |       |
| 1813 | 4,1 | 39    | 33,46 | 43,6  | 14,59 | 18,87 | 0,773 | 1,755 |
| 1814 | 3,1 | 38,14 | 43,11 | 49,38 | 21,29 | 21,82 | 0,975 | 1,932 |



|      |     |       |       |       |       |       |       |       |
|------|-----|-------|-------|-------|-------|-------|-------|-------|
| 1815 | 3,8 | 37,57 | 38,3  | 48,19 | 18,46 | 19,84 | 0,93  | 1,876 |
| 1816 | 2,6 | 37,57 |       |       |       |       |       |       |
| 1817 | 4,8 | 37,57 | 43,02 | 48,44 | 20,84 | 22,18 | 0,939 | 1,903 |
| 1818 | 3,2 | 38,72 | 37,74 | 47,72 | 18,01 | 19,73 | 0,912 | 1,717 |
| 1819 | 4,5 | 32,72 | 35,73 | 42,12 | 15,05 | 20,68 | 0,727 | 2,007 |
| 1820 | 3,6 | 38,57 | 47,36 | 52,42 | 24,83 | 22,53 | 1,102 | 2,155 |
| 1821 | 4   | 36,57 |       |       |       |       |       |       |
| 1822 | 4,8 | 38,28 | 44,03 | 48,42 | 21,32 | 22,71 | 0,938 | 2,026 |
| 1823 | 4,1 | 27    | 31,78 | 41,12 | 13,07 | 18,71 | 0,698 | 1,776 |
| 1824 | 3,4 | 38,28 |       |       |       |       |       |       |
| 1825 | 4   | 38    |       |       |       |       |       |       |
| 1826 | 3,8 | 37,43 |       |       |       |       |       |       |
| 1827 | 3,2 | 34,86 |       |       |       |       |       |       |
| 1828 | 4,3 | 39,72 |       |       |       |       |       |       |
| 1829 | 2,7 | 38,57 |       |       |       |       |       |       |
| 1830 | 4,3 | 38,14 |       |       |       |       |       |       |
| 1831 | 3,9 | 39,86 |       |       |       |       |       |       |
| 1832 | 3,8 | 35,86 |       |       |       |       |       |       |
| 1833 | 4,6 | 20,28 | 39,23 | 44,09 | 17,3  | 21,93 | 0,788 | 2,151 |
| 1834 | 5,4 | 13,28 | 40    | 44,62 | 17,85 | 22,15 | 0,805 | 2,119 |
| 1835 | 3,5 | 38,43 |       |       |       |       |       |       |
| 1836 | 3,3 | 39,14 | 37,89 | 47,98 | 18,18 | 19,71 | 0,922 | 1,861 |
| 1837 | 3,5 | 33,72 | 37,15 | 45,92 | 17,06 | 20,09 | 0,849 | 1,911 |
| 1838 | 4,1 | 35,72 | 34,84 | 43,88 | 15,29 | 19,55 | 0,782 | 1,895 |
| 1839 | 3,4 | 13,72 | 39,62 | 43,23 | 17,13 | 22,49 | 0,76  |       |
| 1840 | 3,5 | 20,72 | 39,03 | 43,14 | 16,84 | 22,19 | 0,76  |       |
| 1841 | 4,3 | 19,43 | 32,91 | 44,02 | 14,49 | 18,42 | 0,786 | 1,849 |
| 1842 | 4,1 | 36,57 | 39,04 | 47,92 | 18,71 | 20,33 | 0,92  | 1,89  |
| 1843 | 3,6 | 22,14 | 37,8  | 47,61 | 18    | 19,8  | 0,909 | 1,778 |
| 1844 | 4,6 | 32,86 | 37,86 | 48,57 | 18,39 | 19,47 | 0,944 | 1,867 |
| 1845 | 3,2 | 34,14 | 51,44 | 49,65 | 25,54 | 25,9  | 0,986 | 2,301 |
| 1846 | 4   | 36,72 | 48,39 | 49,24 | 23,83 | 24,56 | 0,97  | 2,301 |
| 1847 | 3,4 | 37    |       |       |       |       |       |       |

|      |     |       |       |       |       |       |       |       |
|------|-----|-------|-------|-------|-------|-------|-------|-------|
| 1848 | 4,4 | 27    | 40,85 | 45,75 | 18,69 | 22,16 | 0,843 | 1,977 |
| 1849 | 3,6 | 33,72 | 46,89 | 49,84 | 23,37 | 23,52 | 0,993 |       |
| 1850 | 3,1 | 35    | 34,33 | 44,27 | 15,2  | 19,13 | 0,794 | 1,805 |
| 1851 | 3,1 | 21    | 30,83 | 42,97 | 13,25 | 17,58 | 0,75  |       |
| 1852 | 4,8 | 23,72 | 33,68 | 42,22 | 14,22 | 19,46 | 0,73  |       |
| 1853 | 4,7 | 40,43 | 54,26 | 54,99 | 29,84 | 24,42 | 1,221 | 2,239 |
| 1854 | 3,8 | 39,28 | 32,45 | 45,63 | 14,81 | 17,64 | 0,839 | 1,687 |
| 1855 | 3,9 | 36,86 | 38,7  | 45,94 | 17,78 | 20,92 | 0,849 | 1,851 |
| 1856 | 3,6 | 33,86 | 34,25 | 47,53 | 16,28 | 17,97 | 0,905 | 1,63  |
| 1857 | 3,9 | 34,43 | 45,52 | 50,48 | 22,98 | 22,54 | 1,019 | 2,138 |
| 1858 | 4   | 37,43 |       |       |       |       |       |       |
| 1859 | 3,6 | 36,57 | 50,49 | 50,12 | 25,31 | 25,18 | 1,005 | 1,802 |
| 1860 | 3,8 | 24,43 | 40,28 | 46,17 | 18,6  | 21,68 | 0,857 | 1,748 |
| 1861 | 3,6 | 12,57 | 40,1  | 47,08 | 18,88 | 21,22 | 0,889 | 1,664 |
| 1862 | 2,5 | 35,28 |       |       |       |       |       |       |
| 1863 | 4   | 38,57 | 33,96 | 45,87 | 15,58 | 18,38 | 0,847 | 1,712 |
| 1864 | 3,6 | 40    |       |       |       |       |       |       |
| 1865 | 4,3 | 30,72 | 34,24 | 43,98 | 15,06 | 19,18 | 0,785 | 1,798 |
| 1866 | 3,4 | 39    |       |       |       |       |       |       |
| 1867 | 4,4 | 24,28 |       |       |       |       |       |       |
| 1868 | 3,5 | 37,28 | 43,43 | 50,25 | 21,82 | 21,61 | 1,009 | 1,99  |
| 1869 | 3,5 | 36    | 43,28 | 50,48 | 21,85 | 21,43 | 1,019 | 1,926 |
| 1870 | 5,9 | 37,57 | 55,39 | 46,45 | 25,73 | 29,66 | 0,867 | 1,938 |
| 1871 | 4,1 | 30,72 | 37,87 | 44,04 | 16,68 | 21,19 | 0,787 | 1,985 |
| 1872 | 3,9 | 38,86 | 46,04 | 46,85 | 21,57 | 24,47 | 0,881 | 2,137 |
| 1873 | 4,7 | 33,43 |       |       |       |       |       |       |
| 1874 | 3,7 | 34    | 38,97 | 49,63 | 19,11 | 19,86 | 0,962 | 1,909 |
| 1875 | 3,3 | 34,14 | 36,89 | 40,98 | 15,12 | 21,77 | 0,694 | 1,76  |
| 1876 | 4,2 | 19,43 | 30,25 | 41,22 | 12,47 | 17,78 | 0,701 | 1,653 |
| 1877 | 4   | 10,86 | 29,73 | 41,43 | 12,32 | 17,41 | 0,71  |       |
| 1878 | 4,9 | 38,86 | 58,22 | 51,78 | 30,15 | 28,07 | 1,074 | 2,58  |
| 1879 | 3,8 | 36,72 | 39,51 | 45,3  | 19,7  | 21,61 | 0,828 | 1,983 |
| 1880 | 4,5 | 36,57 | 34,23 | 44,02 | 15,07 | 19,16 | 0,786 | 1,728 |

|      |     |       |       |       |       |       |       |       |
|------|-----|-------|-------|-------|-------|-------|-------|-------|
| 1881 | 4   | 35    |       |       |       |       |       |       |
| 1882 |     | 36,57 | 61,63 | 49,05 | 30,23 | 31,4  | 0,962 | 2,364 |
| 1883 | 3,7 | 39,14 | 47,11 | 50,64 | 23,86 | 23,25 | 1,026 | 2,194 |
| 1884 | 3,8 | 37    | 40,03 | 45,14 | 18,07 | 21,96 | 0,822 | 2,157 |
| 1885 | 2,7 | 22,14 |       |       |       |       |       |       |
| 1886 |     | 10,43 |       |       |       |       |       |       |
| 1887 | 3,9 | 38,57 |       |       |       |       |       |       |
| 1888 |     | 11,72 |       |       |       |       |       |       |
| 1889 | 3,2 | 19,86 | 31,36 | 43,04 | 13,5  | 17,86 | 0,755 | 1,638 |
| 1890 | 3,3 | 34,28 | 37,57 | 47,1  | 17,7  | 19,87 | 0,89  | 1,775 |
| 1891 | 3,4 | 10,86 | 30,76 | 42,19 | 12,98 | 17,78 | 0,73  | 1,648 |
| 1892 |     | 11,14 |       |       |       |       |       |       |
| 1893 |     | 11,72 |       |       |       |       |       |       |
| 1894 | 4,3 | 22,43 | 32,17 | 43,82 | 14,1  | 18,07 | 0,78  | 1,63  |
| 1895 | 3,9 | 39,86 | 40,76 | 49,68 | 20,25 | 20,51 | 0,987 | 1,791 |
| 1896 | 3,6 | 13,43 | 31,7  | 42,8  | 13,57 | 18,13 | 0,748 | 1,609 |
| 1897 | 4   | 20,72 | 39,73 | 46,33 | 18,41 | 21,32 | 0,863 | 1,973 |
| 1898 | 3,6 | 12,28 | 37,77 | 44,55 | 16,83 | 20,94 | 0,803 | 1,938 |
| 1899 | 4,3 | 40,43 | 37,67 | 43,69 | 16,46 | 21,21 | 0,776 | 2,062 |
| 1900 | 4,5 | 20,86 | 36,87 | 43,47 | 16,03 | 20,84 | 0,769 | 1,955 |
| 1901 | 4,8 | 12,86 | 34,46 | 42,19 | 14,54 | 19,92 | 0,729 | 1,905 |
| 1902 | 3,6 | 29    | 31,8  | 42,61 | 13,55 | 18,25 | 0,742 | 1,791 |
| 1903 | 3,2 | 11,72 | 30,78 | 41,97 | 12,92 | 17,86 | 0,723 | 1,712 |
| 1904 | 3,3 | 20,28 | 30,76 | 42,23 | 12,99 | 17,77 | 0,731 | 1,712 |
| 1905 |     | 10,86 |       |       |       |       |       |       |
| 1906 | 3,5 | 11,72 | 33,39 | 43,33 | 14,47 | 18,92 | 0,764 | 1,74  |
| 1907 | 3,5 | 22,72 | 35,99 | 45,15 | 16,25 | 19,74 | 0,823 | 1,776 |
| 1908 | 3,4 | 36,57 | 44,7  | 51,85 | 23,18 | 21,52 | 1,077 | 1,947 |
| 1909 | 3,2 | 36,28 | 51,97 | 47,04 | 24,45 | 27,52 | 0,888 | 1,843 |
| 1910 | 3,9 | 11,14 | 30,52 | 42,72 | 13,04 | 17,48 | 0,745 | 1,596 |
| 1911 | 4,1 | 20,14 | 33,5  | 43,28 | 14,5  | 19    | 0,763 | 1,651 |
| 1912 | 3,5 | 24,14 | 36,35 | 44,29 | 16,1  | 20,25 | 0,795 | 1,844 |
| 1913 | 2,9 | 34,57 | 35,85 | 46,79 | 18,18 | 20,67 | 0,879 | 1,917 |

|      |     |       |       |       |       |       |       |       |
|------|-----|-------|-------|-------|-------|-------|-------|-------|
| 1914 | 3,6 | 10    |       |       |       |       |       |       |
| 1915 | 4,2 | 11,57 | 24,4  | 39,5  | 9,64  | 14,76 | 0,653 | 1,428 |
| 1916 | 3,4 | 37,14 | 37,51 | 46,33 | 17,38 | 20,13 | 0,863 | 1,878 |
| 1917 | 3,7 | 21,14 | 33,82 | 44,08 | 14,91 | 18,91 | 0,788 | 1,778 |
| 1918 | 3,4 | 13,72 |       |       |       |       |       |       |
| 1919 |     | 11,72 |       |       |       |       |       |       |
| 1920 | 4,4 | 21    | 33,28 | 43,84 | 14,59 | 18,69 | 0,78  | 1,728 |
| 1921 | 3,8 | 11,57 | 31,74 | 42,5  | 13,49 | 18,25 | 0,739 | 1,661 |
| 1922 | 5,3 | 11,57 | 43,15 | 43,82 | 18,91 | 24,24 | 0,78  | 2,299 |
| 1923 | 4,7 | 32,14 |       |       |       |       |       |       |
| 1924 | 4,9 | 20,72 |       |       |       |       |       |       |
| 1925 | 4,4 | 12,28 |       |       |       |       |       |       |
| 1926 | 3,9 | 38    | 49,02 | 49,12 | 24,08 | 24,94 | 0,965 | 2,271 |
| 1927 | 3,7 | 12,72 | 38,88 | 43,23 | 16,81 | 22,07 | 0,761 | 2,13  |
| 1928 | 3,4 | 20,43 | 39,8  | 45,87 | 18,26 | 21,54 | 0,847 | 2,014 |
| 1929 | 3,4 | 11,43 | 38,38 | 44,05 | 16,91 | 21,47 | 0,787 | 1,965 |
| 1930 | 4,3 | 12    |       |       |       |       |       |       |
| 1931 | 4,2 | 19,28 |       |       |       |       |       |       |
| 1932 | 6,4 | 32,14 |       |       |       |       |       |       |
| 1933 |     | 11,43 |       |       |       |       |       |       |
| 1934 |     | 12,86 |       |       |       |       |       |       |
| 1935 |     | 12,72 |       |       |       |       |       |       |
| 1936 |     | 35,86 |       |       |       |       |       |       |
| 1937 |     | 36,72 |       |       |       |       |       |       |
| 1938 |     | 38,72 |       |       |       |       |       |       |
| 1939 |     | 36,57 |       |       |       |       |       |       |
| 1940 |     | 33,86 |       |       |       |       |       |       |
| 1941 |     | 39,28 |       |       |       |       |       |       |
| 1942 |     | 35,57 |       |       |       |       |       |       |
| 1943 |     | 36,86 |       |       |       |       |       |       |
| 1944 |     | 36,57 |       |       |       |       |       |       |
| 1945 |     | 37,14 |       |       |       |       |       |       |
| 1946 |     | 38,43 |       |       |       |       |       |       |

|      |       |  |  |  |  |  |  |
|------|-------|--|--|--|--|--|--|
| 1947 | 33,72 |  |  |  |  |  |  |
| 1948 | 37,43 |  |  |  |  |  |  |
| 1949 | 37,86 |  |  |  |  |  |  |
| 1950 | 39,72 |  |  |  |  |  |  |
| 1951 | 33,57 |  |  |  |  |  |  |
| 1952 | 34,86 |  |  |  |  |  |  |
| 1953 | 38,57 |  |  |  |  |  |  |
| 1954 | 38,86 |  |  |  |  |  |  |
| 1955 | 38,14 |  |  |  |  |  |  |
| 1956 | 40,57 |  |  |  |  |  |  |
| 1957 | 35,72 |  |  |  |  |  |  |
| 1958 | 38,28 |  |  |  |  |  |  |
| 1959 | 36,28 |  |  |  |  |  |  |
| 1960 | 37,72 |  |  |  |  |  |  |
| 1961 | 33,72 |  |  |  |  |  |  |
| 1962 | 40,28 |  |  |  |  |  |  |
| 1963 | 36,72 |  |  |  |  |  |  |
| 1964 | 40    |  |  |  |  |  |  |
| 1965 | 35,86 |  |  |  |  |  |  |
| 1966 | 33,72 |  |  |  |  |  |  |
| 1967 | 35    |  |  |  |  |  |  |
| 1968 | 32,72 |  |  |  |  |  |  |
| 1969 | 38,28 |  |  |  |  |  |  |
| 1970 | 39    |  |  |  |  |  |  |
| 1971 | 38    |  |  |  |  |  |  |
| 1972 | 38,14 |  |  |  |  |  |  |
| 1973 | 36    |  |  |  |  |  |  |
| 1974 | 40,43 |  |  |  |  |  |  |
| 1975 | 39,14 |  |  |  |  |  |  |
| 1976 | 40,43 |  |  |  |  |  |  |
| 1977 | 40    |  |  |  |  |  |  |
| 1978 | 37,57 |  |  |  |  |  |  |
| 1979 | 35,57 |  |  |  |  |  |  |

|      |     |       |       |       |       |       |       |       |
|------|-----|-------|-------|-------|-------|-------|-------|-------|
| 1980 |     | 37,72 |       |       |       |       |       |       |
| 1981 |     | 35,72 |       |       |       |       |       |       |
| 1982 |     | 37,57 |       |       |       |       |       |       |
| 1983 |     | 30,57 |       |       |       |       |       |       |
| 1984 |     | 34,86 |       |       |       |       |       |       |
| 1985 |     | 36,28 |       |       |       |       |       |       |
| 1986 |     | 34,28 |       |       |       |       |       |       |
| 1987 |     | 38,86 |       |       |       |       |       |       |
| 1988 |     | 36,14 |       |       |       |       |       |       |
| 1989 | 5,7 | 20,72 | 35,82 | 43,99 | 15,76 | 20,06 | 0,785 | 1,878 |
| 1990 | 4,5 | 11,28 | 35,85 | 43,62 | 15,64 | 20,21 | 0,773 | 1,841 |
| 1991 | 4,2 | 22    | 34,08 | 42,89 | 14,62 | 19,46 | 0,751 | 1,879 |
| 1992 | 4,3 | 13    | 33,46 | 41,9  | 14,02 | 19,44 | 0,721 | 1,842 |
| 1993 | 4,2 | 11,43 | 33,08 | 42,53 | 14,07 | 19,01 | 0,74  | 1,783 |
| 1994 | 4,2 | 20    |       |       |       |       |       |       |
| 1995 | 3,5 | 19,86 | 38,01 | 44,61 | 16,96 | 21,05 | 0,805 | 1,973 |
| 1996 | 3,9 | 11,14 | 37,29 | 43,84 | 16,35 | 20,94 | 0,78  | 1,973 |
| 1997 | 4,9 | 10,57 | 33,21 | 42,33 | 14,06 | 19,15 | 0,734 | 1,741 |
| 1998 | 4   | 12,28 | 39,35 | 44,11 | 17,36 | 21,99 | 0,789 | 2,066 |
| 1999 | 4,1 | 21,14 | 30,99 | 43,14 | 13,37 | 17,62 | 0,758 | 1,639 |
| 2000 | 4,3 | 13,86 | 31,57 | 43,49 | 13,73 | 17,84 | 0,769 | 1,598 |
| 2001 | 4,3 | 20,43 | 35,14 | 41,57 | 14,61 | 20,53 | 0,711 | 1,881 |
| 2002 | 3,6 | 12,43 | 35,71 | 42,22 | 15,08 | 20,63 | 0,73  | 1,835 |
| 2003 | 4,3 | 20,57 | 38,34 | 42,61 | 16,34 | 22    | 0,742 | 2,224 |
| 2004 | 4,4 | 11,86 | 38,45 | 42,41 | 16,31 | 22,14 | 0,736 | 2,224 |
| 2005 | 3,4 | 25,86 | 33,39 | 42,31 | 14,14 | 19,25 | 0,734 | 1,688 |
| 2006 | 4   | 35,57 | 27,08 | 39,18 | 10,61 | 16,47 | 0,644 | 1,578 |
| 2007 | 5   | 27,72 |       |       |       |       |       |       |
| 2008 | 4,6 | 35    |       |       |       |       |       |       |
| 2009 | 3,4 | 36,57 | 29,69 | 42,13 | 12,51 | 17,18 | 0,728 | 1,532 |
| 2010 | 3,7 | 38,86 | 35,68 | 44    | 15,7  | 19,98 | 0,785 | 1,858 |
| 2011 | 3,5 | 37    |       |       |       |       |       |       |
| 2012 | 4,7 | 28,14 | 46,37 | 46,19 | 21,42 | 24,95 | 0,858 | 2,287 |

|      |     |       |       |       |       |       |       |       |
|------|-----|-------|-------|-------|-------|-------|-------|-------|
| 2013 | 3,9 | 40,72 | 32,49 | 43,89 | 14,26 | 18,23 | 0,782 | 1,838 |
| 2014 | 3,9 | 38,14 |       |       |       |       |       |       |
| 2015 | 5,3 | 40,43 |       |       |       |       |       |       |
| 2016 | 3,3 | 38,28 | 35,43 | 46,28 | 16,4  | 19,03 | 0,861 | 1,896 |
| 2017 | 3,5 | 40,43 |       |       |       |       |       |       |
| 2018 | 3,2 | 37,72 | 30,76 | 42,06 | 12,94 | 17,82 | 0,826 | 1,699 |
| 2019 | 3   | 38    | 39,88 | 45,73 | 18,24 | 21,64 | 0,842 | 1,95  |
| 2020 | 3,6 | 35,86 |       |       |       |       |       |       |
| 2021 | 4,9 | 36,72 |       |       |       |       |       |       |
| 2022 | 3,3 | 39,14 | 32,49 | 44,75 | 14,54 | 17,95 | 0,81  | 1,632 |
| 2023 | 3,1 | 35,86 |       |       |       |       |       |       |
| 2024 | 3,8 | 40    | 40,86 | 46,74 | 19,1  | 21,76 | 0,877 | 2,097 |
| 2025 | 3,6 | 33    | 36,17 | 46,33 | 16,76 | 19,41 | 0,863 | 1,909 |
| 2026 | 4,6 | 37,72 | 38,56 | 47,61 | 18,36 | 20,2  | 0,908 | 1,885 |
| 2027 | 4,9 | 36,86 |       |       |       |       |       |       |
| 2028 | 3,7 | 36    |       |       |       |       |       |       |
| 2029 | 3,8 | 37    | 36,03 | 44,21 | 15,93 | 20,1  | 0,792 | 1,866 |
| 2030 | 3,6 | 39,43 | 37,01 | 44,9  | 16,62 | 20,39 | 0,815 | 2,069 |
| 2031 | 4,2 | 39,72 |       |       |       |       |       |       |
| 2032 | 4,5 | 37,86 | 42,42 | 50,02 | 21,22 | 21,2  | 1     | 2,032 |
| 2033 | 2,8 | 35,28 |       |       |       |       |       |       |
| 2034 | 5,2 | 34,86 |       |       |       |       |       |       |
| 2035 | 3,5 | 39,72 |       |       |       |       |       |       |
| 2036 |     | 32,14 |       |       |       |       |       |       |
| 2037 | 4,9 | 21,86 |       |       |       |       |       |       |
| 2038 | 3,6 | 33,43 | 32,06 | 42,63 | 13,67 | 18,59 | 0,743 | 1,699 |
| 2039 | 2,8 | 35,28 | 41,36 | 46,08 | 19,06 | 22,3  | 0,854 | 2,003 |
| 2040 | 2,7 | 39,72 |       |       |       |       |       |       |
| 2041 | 3,1 | 39    |       |       |       |       |       |       |
| 2042 | 3,3 | 38,86 |       |       |       |       |       |       |
| 2043 | 4,6 | 37,28 |       |       |       |       |       |       |
| 2044 | 3,2 | 34,72 | 41,55 | 47,05 | 19,55 | 22    | 0,888 | 2,038 |
| 2045 | 3,9 | 38,43 | 32,03 | 43,7  | 14    | 18,03 | 0,776 | 1,667 |

|      |     |       |       |       |       |       |       |       |
|------|-----|-------|-------|-------|-------|-------|-------|-------|
| 2046 | 4,6 | 37,86 | 49,49 | 47,78 | 23,65 | 25,84 | 0,915 | 2,353 |
| 2047 | 3,3 | 38,28 |       |       |       |       |       |       |
| 2048 | 4,5 | 38    | 41,46 | 49,15 | 20,38 | 21,08 | 0,966 | 2,028 |
| 2049 | 4,7 | 19,86 |       |       |       |       |       |       |
| 2050 | 4,7 | 38    | 52,48 | 46,34 | 24,32 | 28,16 | 0,863 | 2,621 |
| 2051 | 4,3 | 38,86 | 58,42 | 47,55 | 27,78 | 30,64 | 0,906 | 2,435 |
| 2052 | 4,1 | 40,28 |       |       |       |       |       |       |
| 2053 | 4   | 30,43 | 39,38 | 43,19 | 17,01 | 22,37 | 0,76  | 2,224 |
| 2054 | 4,8 | 24,43 | 40,32 | 44,19 | 17,82 | 22,5  | 0,792 | 2,203 |
| 2055 | 4,2 | 19,57 | 36,63 | 46,13 | 16,9  | 19,73 | 0,856 | 2,088 |
| 2056 | 4,3 | 34,86 | 47,41 | 45,89 | 21,76 | 25,65 | 0,848 | 2,611 |
| 2057 | 3,3 | 36,72 | 46,93 | 52,22 | 24,51 | 22,42 | 1,093 | 2,102 |
| 2058 | 3,7 | 32,14 |       |       |       |       |       |       |
| 2059 | 4,1 | 34,14 | 36,01 | 44,7  | 16,1  | 19,91 | 0,808 | 1,865 |
| 2060 | 3,9 | 20    | 34,41 | 43,82 | 15,08 | 19,33 | 0,78  | 1,784 |
| 2061 | 3,7 | 12    | 33,16 | 43,24 | 14,34 | 18,82 | 0,761 | 1,749 |
| 2062 | 2,8 | 26,43 |       |       |       |       |       |       |
| 2063 | 3,3 | 34,14 | 43,15 | 44,95 | 19,4  | 23,75 | 0,816 | 2,053 |
| 2064 | 4   | 35,14 |       |       |       |       |       |       |
| 2065 | 4,2 | 33,57 | 36,02 | 44,19 | 15,92 | 20,1  | 0,792 | 1,87  |
| 2066 | 2,8 | 38    |       |       |       |       |       |       |
| 2067 | 3,2 | 40,14 | 38,47 | 48,99 | 18,85 | 19,62 | 0,96  | 1,85  |
| 2068 | 5,7 | 35,28 |       |       |       |       |       |       |
| 2069 | 3,2 | 35,28 | 39,08 | 49,12 | 19,2  | 19,88 | 0,965 | 1,861 |
| 2070 | 2,6 | 33,14 |       |       |       |       |       |       |
| 2071 | 3,5 | 36,72 | 36,62 | 47,7  | 17,47 | 19,15 | 0,912 | 1,761 |
| 2072 | 3,6 | 19    | 31,51 | 41,57 | 13,1  | 18,41 | 0,711 | 1,694 |
| 2073 | 4,6 | 30    | 32,35 | 41,73 | 13,5  | 18,85 | 0,716 | 1,825 |
| 2074 | 3,2 | 40    | 47,94 | 47,78 | 22,91 | 25,03 | 0,915 | 2,34  |
| 2075 | 4,3 | 32,86 | 40,49 | 44,28 | 17,93 | 22,56 | 0,794 | 2,165 |
| 2076 | 3,1 | 37,28 | 39,07 | 45,94 | 17,95 | 21,12 | 0,849 | 1,996 |
| 2077 |     | 12,72 |       |       |       |       |       |       |
| 2078 | 4   | 41    |       |       |       |       |       |       |



|      |     |       |       |       |       |       |       |       |
|------|-----|-------|-------|-------|-------|-------|-------|-------|
| 2079 | 3,8 | 36,28 | 42,44 | 50,61 | 21,48 | 20,96 | 1,024 | 1,926 |
| 2080 | 3,7 | 24,86 | 43,35 | 48,28 | 20,93 | 22,42 | 0,933 | 2,134 |
| 2081 | 3,6 | 34,14 | 39,98 | 43,39 | 17,35 | 22,63 | 0,766 | 2,258 |
| 2082 | 4,6 | 20,86 | 36,99 | 43,3  | 16,02 | 20,97 | 0,763 | 1,881 |
| 2083 | 4,2 | 31,28 | 35,1  | 44,27 | 15,54 | 19,56 | 0,794 | 1,811 |
| 2084 | 4,4 | 18,57 | 32,14 | 42,75 | 13,74 | 18,4  | 0,746 | 1,767 |
| 2085 | 4,2 | 10,57 | 30,64 | 42,19 | 12,93 | 17,71 | 0,73  | 1,695 |
| 2086 | 3,3 | 12,14 | 39,84 | 44,52 | 17,74 | 22,1  | 0,802 | 2,15  |
| 2087 | 3,9 | 34,14 |       |       |       |       |       |       |
| 2088 | 3,9 | 12,43 | 33,41 | 42,71 | 14,27 | 19,14 | 0,745 | 1,687 |
| 2089 | 4,4 | 20,43 | 34,69 | 43,35 | 15,04 | 19,65 | 0,765 | 1,768 |
| 2090 | 4,8 | 20,43 | 36,1  | 45,78 | 16,53 | 19,57 | 0,844 | 1,774 |
| 2091 | 3,8 | 11,43 | 33,26 | 43,68 | 14,53 | 18,73 | 0,775 | 1,71  |
| 2092 |     | 12,28 |       |       |       |       |       |       |
| 2093 | 5,4 | 32,72 | 35,55 | 44,33 | 15,76 | 19,79 | 0,796 | 1,783 |
| 2094 | 4,7 | 19,57 | 32,51 | 42,23 | 13,73 | 18,78 | 0,731 | 1,688 |
| 2095 | 3,4 | 8     | 30,13 | 41,25 | 12,43 | 17,7  | 0,7   |       |
| 2096 | 4,5 | 19,57 | 39,6  | 43,53 | 17,24 | 22,36 | 0,771 | 2,261 |
| 2097 | 5,2 | 11,57 | 39,94 | 43,28 | 17,29 | 22,65 | 0,763 | 2,258 |
| 2098 | 5,1 | 20,72 | 33,02 | 43,42 | 14,34 | 18,68 | 0,767 | 1,837 |
| 2099 | 4,3 | 12,72 | 32,23 | 43,25 | 13,94 | 18,29 | 0,762 | 1,736 |
| 2100 | 4,5 | 39,28 | 41,75 | 47,42 | 19,8  | 21,95 | 0,902 | 2,094 |
| 2101 | 4,7 | 21,57 | 38,84 | 47,28 | 18,84 | 21    | 0,897 | 1,985 |
| 2102 | 5,4 | 11,86 | 37,84 | 45,34 | 17,16 | 20,68 | 0,829 | 1,979 |
| 2103 |     | 13,14 |       |       |       |       |       |       |
| 2104 |     | 12,72 |       |       |       |       |       |       |
| 2105 |     | 11,43 |       |       |       |       |       |       |
| 2106 | 4,9 | 33,43 |       |       |       |       |       |       |
| 2107 | 4,3 | 18    |       |       |       |       |       |       |
| 2108 | 4,6 | 12    | 33,81 | 44,48 | 15,04 | 18,77 | 0,801 | 1,731 |
| 2109 |     | 12,72 |       |       |       |       |       |       |
| 2110 |     | 11,86 |       |       |       |       |       |       |
| 2111 | 4,2 | 18,43 | 37,29 | 44,08 | 16,44 | 20,85 | 0,788 | 1,925 |

|      |     |       |       |       |       |       |       |       |
|------|-----|-------|-------|-------|-------|-------|-------|-------|
| 2112 | 4,4 | 13,57 | 35,43 | 42,42 | 15,03 | 20,4  | 0,736 | 1,901 |
| 2113 | 3,4 | 12,28 | 33,71 | 45,83 | 15,45 | 18,26 | 0,846 | 7,796 |
| 2114 | 4   | 33,28 | 34,75 | 46,18 | 16,05 | 18,7  | 0,858 | 1,859 |
| 2115 | 4   | 20    | 33,71 | 45,17 | 15,23 | 18,48 | 0,824 | 1,802 |
| 2116 |     | 12,14 |       |       |       |       |       |       |
| 2117 | 3,7 | 12,28 | 28,28 | 41,05 | 11,61 | 16,67 | 0,696 | 1,549 |
| 2118 | 3,3 | 20,72 | 27,94 | 40,73 | 11,38 | 16,56 | 0,687 | 1,549 |
| 2119 | 5,1 | 20,43 | 32,09 | 44,99 | 14,44 | 17,65 | 0,818 | 1,707 |
| 2120 | 3,8 | 12,43 | 32,54 | 45,82 | 14,91 | 17,63 | 0,845 | 1,668 |
| 2121 | 3,6 | 20,57 | 38,94 | 42,91 | 16,71 | 22,23 | 0,751 | 2,269 |
| 2122 | 3,6 | 12,43 | 40,35 | 44,11 | 17,8  | 22,55 | 0,789 | 2,279 |
| 2123 | 3,7 | 38,57 | 39,48 | 48,12 | 19    | 20,48 | 0,927 | 1,936 |
| 2124 | 4,3 | 12,14 | 29,66 | 40,39 | 11,98 | 17,68 | 0,677 | 1,668 |
| 2125 | 5,1 | 21,86 | 31,78 | 41,44 | 13,17 | 18,61 | 0,707 | 1,749 |
| 2126 | 5,5 | 20,14 | 29,32 | 42,29 | 12,4  | 16,92 | 0,732 | 1,64  |
| 2127 | 4,3 | 12,72 | 30,13 | 43,51 | 13,11 | 17,02 | 0,77  | 1,621 |
| 2128 |     | 10,72 |       |       |       |       |       |       |
| 2129 | 4,6 | 20,72 | 34,56 | 44,35 | 15,33 | 19,23 | 0,797 | 1,805 |
| 2130 | 4,3 | 11,72 | 33,59 | 43,61 | 14,65 | 18,94 | 0,773 | 1,767 |
| 2131 | 4,6 | 20,72 | 29,36 | 43,69 | 12,83 | 16,53 | 0,776 | 1,601 |
| 2132 | 4,5 | 13,14 | 27,91 | 42,63 | 11,9  | 16,01 | 0,743 | 1,583 |
| 2133 | 4,4 | 35,86 | 38,88 | 45,13 | 17,55 | 21,33 | 0,822 | 1,991 |
| 2134 | 4,2 | 13,86 | 35,16 | 43,11 | 15,16 | 20    | 0,758 | 1,863 |
| 2135 | 4,9 | 20,57 | 36,54 | 44,77 | 16,36 | 20,18 | 0,81  | 1,906 |
| 2136 |     | 11,14 |       |       |       |       |       |       |
| 2137 | 3,7 | 19,14 | 32,04 | 42,88 | 13,74 | 18,3  | 0,75  | 1,678 |
| 2138 | 3,3 | 11,72 | 30,25 | 42,04 | 12,72 | 17,53 | 0,725 | 1,61  |
| 2139 | 5,2 | 19,28 | 32,06 | 42,07 | 13,49 | 18,57 | 0,726 | 1,716 |
| 2140 | 4,4 | 12,28 | 31,51 | 41,54 | 13,09 | 18,42 | 0,71  | 1,723 |
| 2141 | 3,6 | 11,86 | 39,83 | 46,29 | 18,44 | 21,39 | 0,862 | 1,973 |
| 2142 | 4,3 | 19,86 | 39,92 | 45,74 | 18,26 | 21,66 | 0,843 | 2,031 |
| 2143 |     | 12,28 |       |       |       |       |       |       |
| 2144 |     | 20,43 |       |       |       |       |       |       |

|      |   |       |       |       |       |       |       |       |
|------|---|-------|-------|-------|-------|-------|-------|-------|
| 2145 | 4 | 11,86 | 30,88 | 40,77 | 12,59 | 18,29 | 0,688 | 1,687 |
| 2146 |   | 39,72 |       |       |       |       |       |       |
| 2147 |   | 40    |       |       |       |       |       |       |
| 2148 |   | 26,72 |       |       |       |       |       |       |
| 2149 |   | 23,72 |       |       |       |       |       |       |
| 2150 |   | 31    |       |       |       |       |       |       |
| 2151 |   | 37    |       |       |       |       |       |       |
| 2152 |   | 39,14 |       |       |       |       |       |       |
| 2153 |   | 39,72 |       |       |       |       |       |       |
| 2154 |   | 38,57 |       |       |       |       |       |       |
| 2155 |   | 39    |       |       |       |       |       |       |
| 2156 |   | 39,28 |       |       |       |       |       |       |
| 2157 |   | 38    |       |       |       |       |       |       |
| 2158 |   | 27,14 |       |       |       |       |       |       |
| 2159 |   | 33,28 |       |       |       |       |       |       |
| 2160 |   | 33,28 |       |       |       |       |       |       |
| 2161 |   | 32,72 |       |       |       |       |       |       |
| 2162 |   | 40    |       |       |       |       |       |       |
| 2163 |   | 36,86 |       |       |       |       |       |       |
| 2164 |   | 37,28 |       |       |       |       |       |       |
| 2165 |   | 38    |       |       |       |       |       |       |
| 2166 |   | 39,43 |       |       |       |       |       |       |
| 2167 |   | 38,28 |       |       |       |       |       |       |
| 2168 |   | 37    |       |       |       |       |       |       |
| 2169 |   | 40,14 |       |       |       |       |       |       |
| 2170 |   | 38    |       |       |       |       |       |       |
| 2171 |   | 39,14 |       |       |       |       |       |       |
| 2172 |   | 39,72 |       |       |       |       |       |       |
| 2173 |   | 37,57 |       |       |       |       |       |       |
| 2174 |   | 39,43 |       |       |       |       |       |       |
| 2175 |   | 39,28 |       |       |       |       |       |       |
| 2176 |   | 36,43 |       |       |       |       |       |       |
| 2177 |   | 38,43 |       |       |       |       |       |       |

|      |     |       |       |       |       |       |       |       |  |
|------|-----|-------|-------|-------|-------|-------|-------|-------|--|
| 2178 |     | 36    |       |       |       |       |       |       |  |
| 2179 |     | 38,72 |       |       |       |       |       |       |  |
| 2180 |     | 33    |       |       |       |       |       |       |  |
| 2181 | 3,5 | 20,57 | 32,3  | 42,1  | 13,6  | 18,7  | 0,727 | 1,697 |  |
| 2182 | 3,3 | 11,57 | 32,41 | 41,99 | 13,61 | 18,8  | 0,723 | 1,669 |  |
| 2183 | 3,7 | 19,86 | 28,75 | 41    | 11,79 | 16,96 | 0,695 | 1,578 |  |
| 2184 | 3,2 | 11,86 | 27,93 | 40,42 | 11,29 | 16,64 | 0,678 | 1,563 |  |
| 2185 | 5   | 20,72 | 33,69 | 43,84 | 14,77 | 18,92 | 0,78  | 1,734 |  |
| 2186 | 4,5 | 12,72 | 32,05 | 42,12 | 13,5  | 18,55 | 0,727 | 1,678 |  |
| 2187 | 4,1 | 12,28 | 36,87 | 42,09 | 15,52 | 21,35 | 0,726 | 1,996 |  |
| 2188 | 5,5 | 20,14 | 37,19 | 42,51 | 15,81 | 21,38 | 0,739 | 2,008 |  |
| 2189 | 4,8 | 13,28 | 39,05 | 43,89 | 17,14 | 21,91 | 0,782 | 2,133 |  |
| 2190 | 5,9 | 19,86 | 40,53 | 44,85 | 18,18 | 22,35 | 0,813 | 2,188 |  |
| 2191 | 4,1 | 20,57 | 37,59 | 44,42 | 16,7  | 20,89 | 0,799 | 1,968 |  |
| 2192 | 4,2 | 12,57 | 37,01 | 44,17 | 16,35 | 20,66 | 0,791 | 1,937 |  |
| 2193 | 3,5 | 38,14 |       |       |       |       |       |       |  |
| 2194 | 3,5 | 27,72 |       |       |       |       |       |       |  |
| 2195 | 5,5 | 33,14 |       |       |       |       |       |       |  |
| 2196 | 4,7 | 26,86 | 44,14 | 44,92 | 19,82 | 24,31 | 0,815 | 2,268 |  |
| 2197 | 4,6 | 34,86 |       |       |       |       |       |       |  |
| 2198 | 5,7 | 24,14 |       |       |       |       |       |       |  |
| 2199 | 3,8 | 32,14 | 35,81 | 44,01 | 15,76 | 20,05 | 0,786 | 1,818 |  |
| 2200 | 4,1 | 24,14 | 35,71 | 44,6  | 15,93 | 19,78 | 0,805 | 1,768 |  |
| 2201 | 3,5 | 38,43 | 38,88 | 48,32 | 18,79 | 20,09 | 0,935 | 1,832 |  |
| 2202 | 4   | 14,28 | 29,95 | 41,43 | 12,41 | 17,54 | 0,71  |       |  |
| 2203 | 3,8 | 21    | 30,24 | 42,03 | 12,71 | 17,53 | 0,725 | 1,741 |  |
| 2204 | 3,5 | 35,57 |       |       |       |       |       |       |  |
| 2205 | 3,6 | 26,72 | 36,65 | 44,69 | 16,38 | 20,27 | 0,808 | 1,878 |  |
| 2206 | 4,9 | 35,86 | 33,48 | 44,11 | 14,77 | 18,71 | 0,789 | 1,85  |  |
| 2207 | 3,2 | 15,28 |       |       |       |       |       |       |  |
| 2208 | 3,7 | 35,43 | 39,74 | 43,78 | 17,4  | 22,34 | 0,778 | 2,144 |  |
| 2209 | 3,6 | 20,28 | 39,66 | 45,18 | 17,92 | 21,74 | 0,824 | 2,079 |  |
| 2210 |     | 12,14 |       |       |       |       |       |       |  |

|      |     |       |       |       |       |       |       |       |
|------|-----|-------|-------|-------|-------|-------|-------|-------|
| 2211 | 3,6 | 11,28 | 36,41 | 45,5  | 16,57 | 19,84 | 0,835 | 1,906 |
| 2212 | 5,7 | 32,72 | 30,56 | 45,25 | 13,83 | 16,73 | 0,826 | 1,667 |
| 2213 | 5   | 20,72 | 30,36 | 44,2  | 13,42 | 16,94 | 0,792 | 1,67  |
| 2214 | 4,4 | 12,72 | 29,08 | 44,01 | 12,8  | 16,28 | 0,786 | 1,602 |
| 2215 | 6,3 | 30,57 |       |       |       |       |       |       |
| 2216 | 4   | 12,14 |       |       |       |       |       |       |
| 2217 | 4,5 | 28,14 | 36,36 | 45,18 | 16,43 | 19,93 | 0,824 | 2,029 |
| 2218 | 4,1 | 12,28 | 35,3  | 44,7  | 15,78 | 19,52 | 0,808 | 1,973 |
| 2219 | 4,1 | 19,43 | 36,19 | 45,53 | 16,48 | 19,71 | 0,836 | 1,996 |
| 2220 | 4,3 | 21,43 | 34,13 | 42,57 | 14,53 | 19,6  | 0,741 | 1,766 |
| 2221 | 3,5 | 9,86  | 34    | 42,5  | 14,45 | 19,55 | 0,739 | 1,719 |
| 2222 |     | 12,28 |       |       |       |       |       |       |
| 2223 | 3,8 | 30,43 | 34,22 | 44,33 | 15,17 | 19,05 | 0,796 | 1,64  |
| 2224 | 3,8 | 21,14 | 31,13 | 43,27 | 13,47 | 17,66 | 0,762 | 1,611 |
| 2225 | 3,1 | 12,14 | 29,41 | 43,01 | 12,65 | 16,76 | 0,754 | 1,553 |
| 2226 | 4,7 | 33,72 |       |       |       |       |       |       |
| 2227 | 4,2 | 20,57 |       |       |       |       |       |       |
| 2228 | 3,7 | 13,72 |       |       |       |       |       |       |
| 2229 | 3,2 | 19,72 | 30,34 | 43,21 | 13,11 | 17,23 | 0,76  | 1,657 |
| 2230 | 2,6 | 10,72 | 30,91 | 42,54 | 13,15 | 17,76 | 0,74  | 1,683 |
| 2231 | 4,5 | 38,28 | 47,01 | 49,47 | 23,26 | 23,75 | 0,979 | 2,245 |
| 2232 | 4,3 | 10,72 | 38,81 | 44,8  | 17,39 | 21,42 | 0,811 | 2,031 |
| 2233 |     | 12,57 |       |       |       |       |       |       |
| 2234 | 4   | 21,43 | 34,25 | 43,29 | 14,83 | 19,42 | 0,763 | 1,852 |
| 2235 | 4   | 13,86 | 33,57 | 43,19 | 14,5  | 19,07 | 0,76  | 1,807 |
| 2236 |     | 19,86 | 41,81 | 44,55 | 18,63 | 23,18 | 0,803 | 2,213 |
| 2237 | 4,2 | 12,43 | 41,74 | 44,75 | 18,68 | 23,06 | 0,81  | 2,152 |
| 2238 | 4,5 | 31    | 38,41 | 43,21 | 16,6  | 21,81 | 0,761 | 2,05  |
| 2239 | 4,7 | 20    | 37,26 | 43,34 | 16,15 | 21,11 | 0,765 | 1,979 |
| 2240 | 4,4 | 13    | 37,22 | 43,33 | 16,13 | 21,09 | 0,764 | 1,973 |
| 2241 | 3,9 | 9,57  | 39,79 | 46,44 | 18,48 | 21,31 | 0,867 | 2,069 |
| 2242 | 4,2 | 20    | 40,12 | 46,23 | 18,55 | 21,57 | 0,859 | 2,08  |
| 2243 |     | 12,43 |       |       |       |       |       |       |

|      |     |       |       |       |       |       |       |       |
|------|-----|-------|-------|-------|-------|-------|-------|-------|
| 2244 | 4,9 | 12,86 | 35,95 | 42,89 | 15,42 | 20,53 | 0,751 | 1,992 |
| 2245 | 5,3 | 19,57 | 37,28 | 43,19 | 16,37 | 20,91 | 0,782 | 2,044 |
| 2246 | 4,2 | 12    | 38,84 | 45,9  | 17,83 | 21,01 | 0,848 | 2,065 |
| 2247 | 4,3 | 30,72 | 42,4  | 46,1  | 19,55 | 21,85 | 0,855 | 2,147 |
| 2248 | 4,1 | 19    | 38,41 | 45,4  | 17,44 | 20,97 | 0,831 | 2,097 |
| 2249 |     | 10,86 |       |       |       |       |       |       |
| 2250 |     | 12,72 |       |       |       |       |       |       |
| 2251 | 4,5 | 24,14 | 30,66 | 41,84 | 12,83 | 17,83 | 0,719 | 1,699 |
| 2252 |     | 12,43 |       |       |       |       |       |       |
| 2253 |     | 13,57 |       |       |       |       |       |       |
| 2254 | 4,8 | 31,57 |       |       |       |       |       |       |
| 2255 | 4,2 | 19,57 |       |       |       |       |       |       |
| 2256 | 3,6 | 14    |       |       |       |       |       |       |
| 2257 |     | 13,28 |       |       |       |       |       |       |
| 2258 |     | 37,57 |       |       |       |       |       |       |
| 2259 |     | 34,86 |       |       |       |       |       |       |
| 2260 |     | 35    |       |       |       |       |       |       |
| 2261 | 4,4 | 12,43 | 36,69 | 43,63 | 16,01 | 20,68 | 0,774 | 1,88  |
| 2262 | 4,9 | 20,43 | 37,48 | 43,59 | 16,34 | 21,14 | 0,772 | 2,015 |
| 2263 | 3,2 | 13,72 | 26,22 | 38,86 | 10,19 | 16,03 | 0,635 | 1,462 |
| 2264 | 3,6 | 20,86 | 27,72 | 39,68 | 11    | 16,72 | 0,657 | 1,674 |
| 2265 | 4,4 | 34,86 | 32,5  | 42,52 | 13,82 | 18,68 | 0,739 | 1,861 |
| 2266 | 4,6 | 35,72 | 33,68 | 42,93 | 14,46 | 19,22 | 0,752 | 1,816 |
| 2267 | 5,1 | 31    |       |       |       |       |       |       |
| 2268 |     | 12,86 |       |       |       |       |       |       |
| 2269 | 4   | 30,28 |       |       |       |       |       |       |
| 2270 | 3,4 | 35,28 |       |       |       |       |       |       |
| 2271 | 4,7 | 30    | 36,65 | 41,39 | 15,17 | 21,48 | 0,706 | 2,174 |
| 2272 | 4,6 | 26,14 | 32,35 | 43,8  | 14,17 | 18,18 | 0,779 | 1,618 |
| 2273 | 4,8 | 34,57 | 41,02 | 44,58 | 18,29 | 22,73 | 0,804 | 2,195 |
| 2274 | 4,5 | 35,43 | 28,64 | 41,79 | 11,97 | 16,67 | 0,718 | 1,57  |
| 2275 | 4,5 | 33    |       |       |       |       |       |       |
| 2276 | 4,8 | 24    |       |       |       |       |       |       |

|      |     |       |       |       |       |       |       |       |
|------|-----|-------|-------|-------|-------|-------|-------|-------|
| 2277 | 4,6 | 12,28 | 33,8  | 42,84 | 14,48 | 19,32 | 0,749 | 1,849 |
| 2278 | 4,4 | 20,14 | 35,17 | 43,84 | 15,42 | 19,75 | 0,78  | 1,891 |
| 2279 | 3,9 | 12    | 31,53 | 43,38 | 13,68 | 17,85 | 0,766 | 1,578 |
| 2280 | 5,1 | 22    | 30,96 | 42,63 | 13,2  | 17,76 | 0,743 | 1,599 |
| 2281 |     | 11,72 |       |       |       |       |       |       |
| 2282 |     | 12,86 |       |       |       |       |       |       |
| 2283 | 3,8 | 12,86 | 28,32 | 41,41 | 11,73 | 16,59 | 0,707 | 1,513 |
| 2284 | 3,8 | 20,86 | 29,15 | 42,09 | 12,27 | 16,88 | 0,726 | 1,576 |
| 2285 | 4,4 | 20,57 | 33,22 | 42,8  | 14,22 | 19    | 0,748 | 1,812 |
| 2286 | 4   | 12,57 | 32,66 | 42,62 | 13,92 | 18,74 | 0,742 | 1,746 |
| 2287 | 4   | 12,72 | 29,62 | 40,71 | 12,06 | 17,56 | 0,686 | 1,64  |
| 2288 | 4,8 | 19,86 | 34,72 | 42,74 | 14,84 | 19,88 | 0,746 | 1,695 |
| 2289 |     | 12    |       |       |       |       |       |       |
| 2290 | 4,4 | 20    | 28,05 | 42,78 | 12    | 16,05 | 0,747 | 1,591 |
| 2291 | 4,7 | 12,57 | 26,53 | 41,31 | 10,96 | 15,57 | 0,703 | 1,537 |
| 2292 | 4,2 | 20,28 | 29,92 | 42,04 | 12,58 | 17,34 | 0,725 | 1,563 |
| 2293 | 3,7 | 11,72 | 29,77 | 42,15 | 12,55 | 17,22 | 0,728 | 1,534 |
| 2294 | 5   | 13    | 33,84 | 45,77 | 15,49 | 18,35 | 0,844 | 1,847 |
| 2295 | 5,1 | 20    | 33,64 | 45,6  | 15,34 | 18,3  | 0,838 | 1,858 |
| 2296 | 4,6 | 20,86 | 32,51 | 43,92 | 14,28 | 18,23 | 0,783 | 1,738 |
| 2297 | 3,8 | 12,86 | 31,45 | 43,68 | 13,74 | 17,71 | 0,775 | 1,686 |
| 2298 | 4,5 | 12    | 31,62 | 43,8  | 13,85 | 17,77 | 0,779 | 1,639 |
| 2299 | 4,4 | 21    | 33,12 | 44,74 | 14,82 | 18,3  | 0,809 | 1,667 |
| 2300 | 3,3 | 12    | 30,77 | 43,09 | 13,26 | 17,51 | 0,757 | 1,67  |
| 2301 | 4,1 | 20    | 32,42 | 44,44 | 14,41 | 18,01 | 0,8   | 1,683 |
| 2302 | 4,5 | 11,14 | 33,93 | 41,14 | 13,96 | 19,97 | 0,699 | 1,869 |
| 2303 | 4,7 | 20,72 | 36,82 | 44,29 | 16,31 | 20,51 | 0,795 | 1,906 |
| 2304 | 4,3 | 12,57 | 36,67 | 45,4  | 16,65 | 20,02 | 0,831 | 1,891 |
| 2305 | 5,1 | 20    | 36,89 | 45,37 | 16,74 | 20,15 | 0,83  | 1,926 |
| 2306 | 3,3 | 11,86 | 30,94 | 43,6  | 13,49 | 17,45 | 0,773 | 1,519 |
| 2307 | 3,6 | 19,86 | 31,22 | 43,81 | 13,68 | 17,54 | 0,779 | 1,519 |
| 2308 |     | 13,14 |       |       |       |       |       |       |
| 2309 | 2,9 | 13,57 | 30    | 41,13 | 12,34 | 17,66 | 0,698 | 1,585 |

|      |     |       |       |       |       |       |       |       |
|------|-----|-------|-------|-------|-------|-------|-------|-------|
| 2310 | 4,4 | 20,57 | 30,96 | 41,63 | 12,89 | 18,07 | 0,713 | 1,62  |
| 2311 | 2,8 | 19    | 28,84 | 41,78 | 12,05 | 16,79 | 0,717 | 1,553 |
| 2312 | 2,5 | 12,86 | 28,55 | 41,89 | 11,96 | 16,59 | 0,72  | 1,51  |
| 2313 | 4,1 | 20,86 | 33,43 | 42,74 | 14,29 | 19,14 | 0,746 | 1,724 |
| 2314 | 3,5 | 11,28 | 33,9  | 42,53 | 14,42 | 19,48 | 0,74  | 1,711 |
| 2315 | 4,1 | 37,43 | 37,86 | 44,21 | 16,74 | 21,12 | 0,792 | 2,045 |
| 2316 | 4,3 | 20    | 37,32 | 44,39 | 16,57 | 20,75 | 0,798 | 1,961 |
| 2317 | 3,5 | 12,14 | 36,13 | 43,39 | 15,68 | 20,45 | 0,766 | 1,951 |
| 2318 |     | 11,86 |       |       |       |       |       |       |
| 2319 | 4,1 | 19,86 | 35,28 | 43,73 | 15,43 | 19,85 | 0,777 | 1,909 |
| 2320 | 4   | 11,43 | 35,78 | 44,35 | 15,87 | 19,91 | 0,797 | 1,885 |
| 2321 | 3,7 | 12    | 32,74 | 43,15 | 14,13 | 18,61 | 0,759 | 1,626 |
| 2322 | 3,8 | 13,43 | 31,16 | 42,84 | 13,35 | 17,81 | 0,749 | 1,688 |
| 2323 | 4,1 | 21,43 | 32,99 | 44,28 | 14,61 | 18,38 | 0,794 | 1,728 |
| 2324 | 4,9 | 19,57 | 36,57 | 44,92 | 16,43 | 20,14 | 0,815 | 1,765 |
| 2325 | 4,3 | 33,14 |       |       |       |       |       |       |
| 2326 | 3,1 | 40    | 42,34 | 50,28 | 21,29 | 21,05 | 1,011 | 2,041 |
| 2327 | 4,7 | 30,57 | 34,27 | 44,2  | 15,15 | 19,12 | 0,792 | 1,866 |
| 2328 | 3,5 | 34    | 37,26 | 44,49 | 16,58 | 20,68 | 0,801 | 1,944 |
| 2329 | 4,6 | 33,86 | 29,36 | 42,77 | 12,56 | 16,8  | 0,747 | 1,58  |
| 2330 | 4,3 | 37,43 |       |       |       |       |       |       |
| 2331 | 3   | 34,86 |       |       |       |       |       |       |
| 2332 | 4,4 | 12,28 | 35,19 | 44,1  | 15,52 | 19,67 | 0,789 | 1,876 |
| 2333 | 5   | 20,28 | 36,37 | 44,84 | 16,31 | 20,06 | 0,813 | 1,895 |
| 2334 | 3   | 32,57 | 27,42 | 43,69 | 11,98 | 15,44 | 0,775 | 1,501 |
| 2335 | 5,5 | 20    | 30,83 | 43,49 | 13,41 | 17,42 | 0,769 | 1,643 |
| 2336 | 5   | 12,43 | 31,23 | 43,41 | 13,56 | 17,67 | 0,767 | 1,656 |
| 2337 | 3,5 | 11    |       |       |       |       |       |       |
| 2338 | 4   | 12,72 | 27,89 | 43,02 | 12    | 15,89 | 0,755 | 1,486 |
| 2339 | 4,3 | 22,57 | 29,36 | 44,38 | 13,03 | 16,33 | 0,797 | 1,541 |
| 2340 | 4,8 | 11,72 | 27,45 | 39,34 | 10,8  | 16,65 | 0,648 | 1,641 |
| 2341 | 5,2 | 20,72 | 28,2  | 40,81 | 11,51 | 16,69 | 0,689 | 1,634 |
| 2342 |     | 11,72 |       |       |       |       |       |       |



|      |     |       |       |       |       |       |       |       |  |
|------|-----|-------|-------|-------|-------|-------|-------|-------|--|
| 2343 |     | 12,14 |       |       |       |       |       |       |  |
| 2344 | 3,8 | 12,72 | 34,69 | 45,02 | 15,62 | 19,07 | 0,819 | 1,805 |  |
| 2345 | 4   | 20,28 | 36,05 | 43,63 | 15,73 | 20,32 | 0,774 | 1,786 |  |
| 2346 | 3,6 | 19,14 | 34,8  | 44,22 | 15,39 | 19,41 | 0,792 | 1,855 |  |
| 2347 | 4   | 11,86 | 33,72 | 43,65 | 14,72 | 19    | 0,774 | 1,735 |  |
| 2348 | 4   | 12,28 | 35,85 | 43,62 | 15,64 | 20,21 | 0,773 | 1,76  |  |
| 2349 | 4,2 | 12    | 32,01 | 42,54 | 13,62 | 18,39 | 0,74  | 1,683 |  |
| 2350 | 4,4 | 19,72 | 34,45 | 44,35 | 15,28 | 19,17 | 0,797 | 1,78  |  |
| 2351 | 4,6 | 20    | 38,49 | 45,44 | 17,49 | 21    | 0,832 | 1,985 |  |
| 2352 |     | 28,43 | 34,71 | 44,1  | 15,31 | 19,4  | 0,789 | 1,829 |  |
| 2353 | 4,6 | 20,14 | 33,93 | 42,44 | 14,4  | 19,53 | 0,737 | 1,807 |  |
| 2354 | 3,9 | 12,72 | 32,89 | 41,98 | 13,81 | 19,08 | 0,723 | 1,761 |  |
| 2355 |     | 11,28 |       |       |       |       |       |       |  |
| 2356 | 3,9 | 11,86 | 33,43 | 42,08 | 14,07 | 19,36 | 0,726 | 1,816 |  |
| 2357 | 4,3 | 34,57 | 34,27 | 42,39 | 14,53 | 19,74 | 0,736 | 1,816 |  |
| 2358 | 4,1 | 19,86 | 34,38 | 43,13 | 14,83 | 19,55 | 0,758 | 1,791 |  |
| 2359 | 3,9 | 12    | 32,35 | 44,35 | 14,35 | 18    | 0,797 | 1,838 |  |
| 2360 | 3,1 | 19,72 | 28,94 | 43,91 | 12,71 | 16,23 | 0,783 | 1,501 |  |
| 2361 | 3,2 | 12,57 | 27,97 | 43,4  | 12,14 | 15,83 | 0,766 | 1,471 |  |
| 2362 | 3,4 | 12,86 |       |       |       |       |       |       |  |
| 2363 | 3,3 | 19,86 | 30,18 | 43,17 | 13,03 | 17,15 | 0,759 | 1,591 |  |
| 2364 | 3,2 | 12,43 | 23,16 | 40,71 | 9,43  | 13,73 | 0,686 | 1,29  |  |
| 2365 | 4,2 | 20    | 23,38 | 41,06 | 9,6   | 13,78 | 0,696 | 1,329 |  |
| 2366 | 4,4 | 31,86 | 35,81 | 43,67 | 15,64 | 20,17 | 0,775 | 1,763 |  |
| 2367 | 4,4 | 22,86 | 35,24 | 43,5  | 15,33 | 19,91 | 0,769 | 1,724 |  |
| 2368 | 4,2 | 12,14 | 34,73 | 43,43 | 15,08 | 19,64 | 0,767 | 1,707 |  |
| 2369 | 3,4 | 12,57 | 32,17 | 44,48 | 14,31 | 17,86 | 0,801 | 1,563 |  |
| 2370 |     | 30,43 |       |       |       |       |       |       |  |
| 2371 | 4,6 | 11,86 | 37,55 | 46,55 | 17,48 | 20,07 | 0,87  | 1,867 |  |
| 2372 | 4,9 | 11,28 | 37,57 | 43,91 | 16,5  | 21,07 | 0,783 | 1,902 |  |
| 2373 | 4,7 | 19,86 | 38,88 | 45,78 | 17,8  | 21,08 | 0,844 | 1,908 |  |
| 2374 | 4,3 | 20,86 | 38,08 | 47    | 17,9  | 20,18 | 0,887 | 1,949 |  |
| 2375 | 4,7 | 20,43 | 33,2  | 42,28 | 14,04 | 19,16 | 0,732 | 1,818 |  |

|      |     |       |       |       |       |       |       |       |
|------|-----|-------|-------|-------|-------|-------|-------|-------|
| 2376 | 4,2 | 12,43 | 32,84 | 42,38 | 13,92 | 18,92 | 0,735 | 1,812 |
| 2377 | 4,5 | 36,57 | 33,89 | 45,05 | 15,27 | 18,62 | 0,82  | 1,702 |
| 2378 | 4,3 | 33,86 | 40,11 | 43,72 | 17,54 | 22,57 | 0,777 | 2,026 |
| 2379 | 3,7 | 24,57 | 35,11 | 42,55 | 14,94 | 20,17 | 0,74  | 1,878 |
| 2380 | 2,8 | 34,28 |       |       |       |       |       |       |
| 2381 | 4,2 | 30,72 |       |       |       |       |       |       |
| 2382 | 4,1 | 31,14 | 34,47 | 44,47 | 15,33 | 19,14 | 0,8   | 1,725 |
| 2383 | 5,1 | 35    |       |       |       |       |       |       |
| 2384 | 4,5 | 37,14 |       |       |       |       |       |       |
| 2385 | 3,5 | 30    |       |       |       |       |       |       |
| 2386 | 5,1 | 28,43 | 28,32 | 44,06 | 12,48 | 15,84 | 0,787 | 1,471 |
| 2387 | 3,2 | 30,86 |       |       |       |       |       |       |
| 2388 | 3,4 | 38,72 |       |       |       |       |       |       |
| 2389 | 3,6 | 30,28 | 36,03 | 45,12 | 16,26 | 19,77 | 0,822 | 1,861 |
| 2390 | 4   | 38,86 |       |       |       |       |       |       |
| 2391 | 3,7 | 30,72 |       |       |       |       |       |       |
| 2392 | 4,8 | 32,14 | 34,29 | 44,32 | 15,2  | 19,09 | 0,796 | 1,72  |
| 2393 | 5,1 | 33,72 |       |       |       |       |       |       |
| 2394 | 4,5 | 25    |       |       |       |       |       |       |
| 2395 | 4,4 | 22,43 | 27,47 | 43,72 | 12,01 | 15,46 | 0,776 | 1,442 |
| 2396 | 3,9 | 32,57 | 31,23 | 42,58 | 13,3  | 17,93 | 0,741 | 1,602 |
| 2397 | 4,8 | 32,28 | 36,11 | 45,41 | 16,4  | 19,71 | 0,832 | 1,849 |
| 2398 | 5,1 | 20,43 | 42,58 | 44,78 | 19,07 | 23,51 | 0,811 | 2,376 |
| 2399 | 4,6 | 35,86 |       |       |       |       |       |       |
| 2400 | 4,3 | 24,14 | 42,73 | 46,54 | 19,89 | 22,84 | 0,87  | 2,026 |
| 2401 | 4,1 | 19,72 | 28,88 | 41,62 | 12,02 | 16,86 | 0,712 | 1,577 |
| 2402 | 3,5 | 11,86 | 28,5  | 41,33 | 11,78 | 16,72 | 0,704 | 1,527 |
| 2403 | 3,1 | 37,43 |       |       |       |       |       |       |
| 2404 | 5,3 | 20,14 | 30,71 | 44,44 | 13,65 | 17,06 | 0,8   | 1,601 |
| 2405 | 5,7 | 12,57 | 31,75 | 45,29 | 14,38 | 17,37 | 0,827 | 1,614 |
| 2406 |     | 11,72 |       |       |       |       |       |       |
| 2407 | 4,8 | 20,43 | 35    | 45,6  | 15,96 | 19,04 | 0,838 | 1,844 |
| 2408 | 4,8 | 12,43 | 34,42 | 44,94 | 15,47 | 18,95 | 0,816 | 1,77  |

|      |     |       |       |       |       |       |       |       |
|------|-----|-------|-------|-------|-------|-------|-------|-------|
| 2409 | 4,1 | 12,28 | 31,16 | 44,22 | 13,78 | 17,38 | 0,792 | 1,617 |
| 2410 | 4,3 | 20    | 30,82 | 43,34 | 13,36 | 17,46 | 0,765 | 1,617 |
| 2411 | 4,8 | 34,72 | 36,35 | 42,58 | 15,48 | 20,87 | 0,741 | 1,981 |
| 2412 | 5   | 20,72 | 37,02 | 42,78 | 15,84 | 21,18 | 0,747 | 1,985 |
| 2413 | 4,2 | 12,14 | 34,54 | 41,14 | 14,21 | 20,33 | 0,698 | 1,973 |
| 2414 | 4   | 11,86 | 30,53 | 43,39 | 13,25 | 17,28 | 0,766 | 1,494 |
| 2415 | 3,7 | 20,72 | 30,51 | 43,33 | 13,22 | 17,29 | 0,764 | 1,521 |
| 2416 |     | 11,43 |       |       |       |       |       |       |
| 2417 |     | 10,57 |       |       |       |       |       |       |
| 2418 | 3,7 | 11,43 | 29,07 | 41,83 | 12,16 | 16,91 | 0,719 | 1,505 |
| 2419 |     | 10,57 |       |       |       |       |       |       |
| 2420 | 4,5 | 12,28 | 31,87 | 41,66 | 13,28 | 18,59 | 0,714 | 1,702 |
| 2421 | 4,2 | 21,14 | 32,66 | 41,51 | 13,56 | 19,1  | 0,709 | 1,762 |
| 2422 | 3,7 | 20,28 | 37,82 | 44,34 | 16,77 | 21,05 | 0,796 | 1,955 |
| 2423 | 3,5 | 12,28 | 33,96 | 42,52 | 14,44 | 19,52 | 0,739 | 1,841 |
| 2424 | 4,7 | 20,14 |       |       |       |       |       |       |
| 2425 | 4,9 | 11,57 | 32,29 | 42,02 | 13,57 | 18,72 | 0,724 | 1,683 |
| 2426 |     | 12,57 |       |       |       |       |       |       |
| 2427 | 3,6 | 30,72 | 32,85 | 43,13 | 14,17 | 18,68 | 0,758 | 1,765 |
| 2428 | 3,8 | 18,86 | 30,72 | 42,02 | 12,91 | 17,81 | 0,724 | 1,658 |
| 2429 | 4,3 | 12,72 | 33,32 | 42,58 | 14,19 | 19,13 | 0,742 | 1,728 |
| 2430 | 3,9 | 20,43 | 34,1  | 43,22 | 14,74 | 19,36 | 0,764 | 1,741 |
| 2431 | 3,9 | 11    | 30,9  | 42,45 | 13,12 | 17,78 | 0,737 | 1,644 |
| 2432 | 3,9 | 13,14 | 29,22 | 41,2  | 12,04 | 17,18 | 0,7   | 1,544 |
| 2433 | 3,7 | 20,14 | 30,11 | 41,87 | 12,61 | 17,5  | 0,72  | 1,587 |
| 2434 |     | 12,57 |       |       |       |       |       |       |
| 2435 | 4,1 | 20    | 30,96 | 41,11 | 12,73 | 18,23 | 0,698 | 1,712 |
| 2436 | 3,8 | 12    | 29,77 | 40,07 | 11,93 | 17,84 | 0,668 | 1,658 |
| 2437 | 4,5 | 20,28 | 40,07 | 46,24 | 18,53 | 21,54 | 0,86  | 2,01  |
| 2438 | 4,6 | 12,28 | 37,82 | 44,55 | 16,85 | 20,97 | 0,803 | 2,026 |
| 2439 | 3,7 | 18,57 | 31,87 | 42,95 | 13,69 | 18,18 | 0,753 | 1,677 |
| 2440 | 3,1 | 10,72 | 30,88 | 42,03 | 12,98 | 17,9  | 0,725 | 1,635 |
| 2441 | 3,4 | 12,14 | 27,36 | 41,08 | 11,24 | 16,12 | 0,697 | 1,602 |

|      |     |       |       |       |       |       |       |       |
|------|-----|-------|-------|-------|-------|-------|-------|-------|
| 2442 | 3,7 | 23,43 | 28,94 | 41,81 | 12,1  | 16,84 | 0,718 | 1,667 |
| 2443 | 3,4 | 19,72 | 34,96 | 44,39 | 15,52 | 19,44 | 0,798 | 1,754 |
| 2444 | 3,7 | 13,14 | 33,76 | 44,07 | 14,88 | 18,88 | 0,788 | 1,687 |
| 2445 |     | 11,43 |       |       |       |       |       |       |
| 2446 | 3,6 | 21    | 30,87 | 44,63 | 13,78 | 17,09 | 0,806 | 1,578 |
| 2447 | 3   | 12,72 | 28,63 | 43,9  | 12,57 | 16,06 | 0,782 | 1,495 |
| 2448 | 4,3 | 12,57 | 30,32 | 42,28 | 12,82 | 17,5  | 0,732 | 1,616 |
| 2449 | 4,8 | 21,72 | 30,51 | 42,31 | 12,91 | 17,6  | 0,733 | 1,644 |
| 2450 | 5,4 | 20,72 | 32,08 | 43,17 | 13,85 | 18,23 | 0,759 | 1,772 |
| 2451 | 5,1 | 13,14 | 31,11 | 42,2  | 13,13 | 17,98 | 0,73  | 1,733 |
| 2452 | 3,7 | 12,14 | 29,41 | 42,5  | 12,5  | 16,91 | 0,739 | 1,005 |
| 2453 | 5   | 22,14 | 33,31 | 44,01 | 14,66 | 18,65 | 0,786 | 1,704 |
| 2454 |     | 33,72 |       |       |       |       |       |       |
| 2455 |     | 29,43 |       |       |       |       |       |       |
| 2456 |     | 34,28 |       |       |       |       |       |       |
| 2457 | 3,9 | 35,86 | 36,92 | 41,73 | 15,41 | 21,51 | 0,716 | 1,949 |
| 2458 | 3,6 | 11,86 |       |       |       |       |       |       |
| 2459 | 3,2 | 30,57 | 31,29 | 43,63 | 13,66 | 17,63 | 0,774 | 1,541 |
| 2460 | 5   | 32,72 | 36,35 | 46,21 | 16,8  | 19,55 | 0,859 | 2     |
| 2461 | 4,4 | 19,86 | 36,01 | 44,59 | 16,06 | 19,95 | 0,805 | 1,876 |
| 2462 | 4,3 | 11,28 | 35,36 | 43,94 | 15,54 | 19,82 | 0,784 | 1,838 |
